# Supplementary material
Source: PubMed Central journal article supplement (PMC6547819)
Supplement: NIHMS1029870-supplement-Supporting_Information.pdf [file NIHMS1029870-supplement-Supporting_Information.pdf]

# Nickel-Catalyzed Asymmetric C-Alkylation of Nitroalkanes: Synthesis of Enantioenriched $\beta$ -Nitroamides

Vijayarajan Devannah, Rajgopal Sharma and Donald A. Watson\*

*Department of Chemistry and Biochemistry, University of Delaware*

*Newark, Delaware 19716*

## Supporting Information

| Index:                                                                        | Page |
|-------------------------------------------------------------------------------|------|
| 1. General Experimental Details                                               | S2   |
| 2. Instrumentation and Chromatography                                         | S2   |
| 3. Observations on Copper-Catalyzed Nitroalkane Alkylation                    | S3   |
| 4. Additional Optimization Studies of Asymmetric Alkylation Reaction          | S4   |
| 5. Preparation of Novel 1,2-Diamine Ligands                                   | S9   |
| 6. Preparation of Novel $\alpha$ -Bromo Amides                                | S16  |
| 7. Preparation of Novel Starting Nitroalkanes                                 | S21  |
| 8. Synthesis of the Single-Component Precatalyst <b>8</b> and X-ray Structure | S21  |
| 9. Description of Thermoelectric Cooling Block                                | S22  |
| 10. Asymmetric Alkylation of Nitroalkanes                                     | S24  |
| 11. Down Stream Functionalization of Alkylated Products                       | S37  |
| 12. Mechanistic Studies                                                       | S41  |
| 13. Assignment of Absolute Stereochemistry of $\beta$ -Nitroamides            | S46  |
| 14. X-ray Structural Solution and Refinement                                  | S47  |
| 15. References                                                                | S48  |
| 16. Spectral and HPLC Data                                                    | S50  |

## 1. General Experimental Details:

Benzene, diethyl ether, dichloromethane, tetrahydrofuran, dimethyl formamide and dioxane were dried on alumina according to a published procedure.<sup>1</sup> Copper bromide, nickel(II)bromide methoxyethyl ether, nickel(II) chloride ethylene glycol dimethyl ether, potassium *tert*-butoxide, lithium methoxide, lithium *tert*-butoxide, lithium trimethylsilanolate sodium methoxide, sodium *tert*-butoxide, potassium trimethylsilanolate and potassium methoxide were purchased commercially; the bulk was stored in a N<sub>2</sub> filled glovebox. All hot glassware was oven dried for a minimum of two hours or flame-dried under vacuum prior to use. *N*-((2*Z*,4*E*)-4-((2,6-dimethylphenyl)imino)pent-2-en-2-yl)-2,6-dimethylaniline,<sup>2</sup> *N*-((2*Z*,4*E*)-4-((2,6-diisopropylphenyl)imino)pent-2-en-2-yl)-2,6-diisopropylaniline,<sup>2</sup> 2-methyl-1-nitropropane,<sup>3</sup> 6-nitrohex-1-ene,<sup>4</sup> 4-nitrobutyl acetate,<sup>5-6</sup> methyl 4-nitrobutanoate,<sup>7</sup> 5-nitropentan-2-one,<sup>8</sup> 2-methyl-2-(3-nitropropyl)-1,3-dioxolane,<sup>9</sup> (2-nitroethyl)benzene,<sup>10</sup> 5-(2-nitroethyl)benzo[d][1,3]dioxole,<sup>11-13</sup> methyl 4-nitropentanoate,<sup>14</sup> 2-bromo-*N*-methoxy-*N*,2-dimethylpropanamide,<sup>15</sup> allyl *tert*-butyl carbonate,<sup>16</sup> 2-bromo-*N*-methoxy-*N*-methylpropanamide,<sup>17</sup> *N*-benzyl-2-bromo-*N*-phenylbutanamide,<sup>18</sup> 2-bromo-*N*,*N*-diethylpropanamide<sup>15</sup> and *N*-benzyl-2-bromo-*N*-phenylhexanamide<sup>18</sup> were synthesized according to the published procedures. Bis(1,5-cyclooctadiene) nickel was purchased commercially and stored in a nitrogen filled glovebox freezer at -35 °C. All other substrates and reagents were purchased in highest analytical purity from commercial suppliers and used as received. Reaction optimization (Table 1 and Table S.1 to S.7) was conducted on a 250 μmol scale in 17 x 60 mm vials with Teflon lined caps. All yields determined by <sup>1</sup>H NMR analysis using 1,3,5-trimethoxybenzene as an internal standard. All reactions performed outside the glovebox were set up using standard Schlenk technique. "Double manifold" refers to a standard Schlenk-line gas manifold equipped with N<sub>2</sub> and vacuum (ca. 0.1 mm Hg). Reactions were heated with stirring in temperature-controlled oil baths or AI heating blocks. Reactions run at subambient temperature were cooled with stirring using a thermoelectric cooling block (see below for details).

## 2. Instrumentation and Chromatography:

400 MHz <sup>1</sup>H, 101 MHz <sup>13</sup>C, and 376 MHz <sup>19</sup>F spectra were obtained on a 400 MHz FT-NMR spectrometer equipped with a Bruker CryoPlatform. 600 MHz <sup>1</sup>H and 151 MHz <sup>13</sup>C NMR spectra were obtained on a 600 MHz FTNMR spectrometer equipped with a Bruker SMART probe. <sup>13</sup>C NMR spectra were recorded using Attached Proton Test phase pulse sequence; carbons with an odd number of protons are phased down and those with an even number of protons are phased up.<sup>19</sup> All samples were analyzed in the indicated deuterio-solvent and were recorded at ambient temperatures. Chemical shifts are reported in ppm. <sup>1</sup>H NMR spectra were calibrated using the residual protio-signal in deuterio-solvents as a standard. <sup>13</sup>C NMR spectra were calibrated using the deuterio-solvent as a standard. IR spectra were recorded on a Nicolet Magma-IR 560 FT-IR spectrometer as thin films on NaCl plates or using KBr pellets. Unless otherwise noted, column chromatography was performed with 40-63 μm silica gel with the eluent reported in parentheses. Where noted 5-20 μm silica gel was used to improve separation. Analytical thin-layer chromatography (TLC) was performed on pre-coated glass plates and visualized by UV or by staining with KMnO<sub>4</sub>. GCMS data was collected using an Agilent 6850 series GC and 5973 MS detectors. Low resolution ESI data was collected on a Thermo LCQ Advantage running in positive ion mode. High resolution MS data was obtained on a Waters GCT Premier spectrometer using chemical ionization (CI) or liquid injection field desorption ionization (LIFDI) or on a Thermo Scientific, Q Exactive model Orbitrap instrument using electrospray ionization (ESI).



**3. Observations on Copper-Catalyzed Nitroalkane Alkylation:** While studying the reaction illustrated below, we observed a small but reproducible change in the diastereoselection of the transformation that depended upon the structure of the ligand. This strongly suggests that the ligand is involved in the C-C bond forming step, and argues against the previously believe outer-sphere mechanism.

**Experimental Procedure for the Copper-Catalyzed Nitroalkane Alkylation:** In a nitrogen filled glovebox, a stir bar, CuBr (0.0125 mmol), ligand (0.0125 mmol), base (0.275 mmol), dichloromethane (1.5 mL), 1-nitropropane (0.300 mmol) and  $\alpha$ -bromoamide (0.25 mmol). The vial was sealed with a Teflon lined cap and heated in an aluminum block on a temperature controlled stir plate to 40 °C with vigorous stirring for 24 h. The vial was removed from the glovebox, opened to air, diluted with a solution of 1,3,5-trimethoxybenzene (0.25 equiv. internal standard) in ethyl acetate (1 mL) and filtered through Celite and concentrated *in vacuo* to give crude material. This material was dissolved in CDCl<sub>3</sub> and quantified by <sup>1</sup>H NMR. The product  $\beta$ -nitroamide is a known compound and its spectra are in accordance with literature data.<sup>15</sup>

**Ligand Effects on Copper-Catalyzed Nitroalkane Alkylation:**

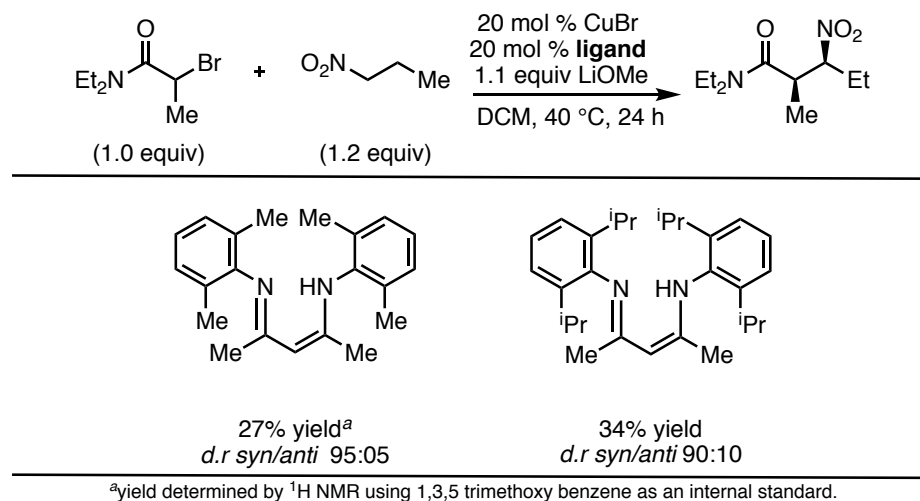

#### 4. Additional Optimization Studies of Asymmetric Alkylation Reaction

**Experimental Details for Optimization of the Nickel-Catalyzed Nitroalkane Alkylation:** In a nitrogen-filled glovebox, a stir bar, Ni(COD)<sub>2</sub> (0.0125 mmol), ligand (0.0125 mmol), and the base (0.275 mmol) were added to a 1-dram vial, followed by Et<sub>2</sub>O (2.5 mL). The vial was sealed with Teflon-line screw cap and the mixture was stirred for 30 min in the glovebox at ambient temperature. Then, 1-nitropropane (0.30 mmol), was added and the suspension was stirred for 1 min.  $\alpha$ -Bromoamide (0.25 mmol) was then added as solid and the suspension was stirred at rt for 24 h. The vial was removed from the glovebox, opened to air, diluted with a solution of 1,3,5-trimethoxybenzene (0.25 equiv. internal standard) in diethyl ether (1 mL) and filtered through Celite and concentrated *in vacuo* to give crude material. This material was dissolved in CDCl<sub>3</sub> and quantified by <sup>1</sup>H NMR. The ee of the crude material was determined using chiral HPLC analysis.

**Optimization of the Ligand:** Outlined in Table S1 is the series of experiments aimed at the optimization of the chiral 1,2 diamine ligand in the nickel catalyzed nitroalkane alkylation. The modular nature of the ligand scaffold allowed us to vary steric and electronic properties at various position in the aromatic ring. After extensive study, ligand **7** found to be optimal for the desired transformation. Synthesis of ligand **7**, **5**, **6** and **S1-S18** were carried out using reductive amination procedure as described in the literature.<sup>20-21</sup>

Table S1: Optimization of Ligand

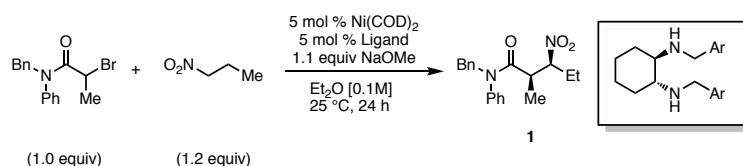

| Entry | Ligand     | Ar                                                   | %Yield <b>1</b> <sup>a</sup> | d.r<br><i>syn/anti</i> | %ee<br><i>syn</i> <sup>b</sup> |
|-------|------------|------------------------------------------------------|------------------------------|------------------------|--------------------------------|
| 1     | <b>7</b>   | 3,5- CF <sub>3</sub> - C <sub>6</sub> H <sub>3</sub> | 82                           | 85:15                  | 88                             |
| 2     | <b>5</b>   | C <sub>6</sub> H <sub>5</sub>                        | 80                           | 82:18                  | 79                             |
| 3     | <b>S1</b>  | 4-OMe-C <sub>6</sub> H <sub>4</sub>                  | 70                           | 79:21                  | 80                             |
| 2     | <b>S2</b>  | 4-NMe <sub>2</sub> -C <sub>6</sub> H <sub>4</sub>    | 84                           | 76:24                  | 79                             |
| 5     | <b>S3</b>  | 4-Me-C <sub>6</sub> H <sub>4</sub>                   | 69                           | 77:23                  | 80                             |
| 6     | <b>S4</b>  | 4-CF <sub>3</sub> -C <sub>6</sub> H <sub>4</sub>     | 63                           | 81:19                  | 80                             |
| 7     | <b>6</b>   | 3,5-Me- C <sub>6</sub> H <sub>3</sub>                | 80                           | 84:16                  | 82                             |
| 7     | <b>S6</b>  | 3,5- <sup>t</sup> Bu- C <sub>6</sub> H <sub>3</sub>  | 52                           | 83:17                  | 86                             |
| 8     | <b>S7</b>  | 1-naphthyl                                           | 20                           | 80:20                  | 79                             |
| 9     | <b>S8</b>  | 2-naphthyl                                           | 55                           | 81:19                  | 82                             |
| 10    | <b>S9</b>  | cyclohexyl                                           | 58                           | 67:33                  | 66                             |
| 11    | <b>S10</b> | C <sub>6</sub> F <sub>5</sub>                        | 16                           | 70:30                  | 86                             |
| 12    | <b>S11</b> | 2-pyridyl                                            | 08                           | 62:38                  | 74                             |
| 13    | <b>S12</b> | 4-OCF <sub>3</sub> -C <sub>6</sub> H <sub>4</sub>    | 68                           | 79:21                  | 77                             |
| 14    | <b>S13</b> | 3-CF <sub>3</sub> -C <sub>6</sub> H <sub>4</sub>     | 58                           | 79:21                  | 82                             |
| 15    | <b>S14</b> | 3,4,5-F-C <sub>6</sub> H <sub>2</sub>                | 58                           | 79:21                  | 80                             |
| 16    | <b>S15</b> | 3,5-F- C <sub>6</sub> H <sub>3</sub>                 | 57                           | 81:19                  | 80                             |
| 17    | <b>S16</b> | 2-MeO- C <sub>6</sub> H <sub>4</sub>                 | 22                           | 64:36                  | 72                             |
| 18    | <b>S17</b> | 3-MeO- C <sub>6</sub> H <sub>4</sub>                 | 66                           | 85:15                  | 84                             |
| 19    | <b>S18</b> | 3,5-MeO- C <sub>6</sub> H <sub>3</sub>               | 64                           | 85:15                  | 86                             |

<sup>a</sup>Yield determined by <sup>1</sup>H NMR using 1,3,5-trimethoxybenzene as an internal standard

<sup>b</sup> Determined by chiral HPLC analysis

### Effect of Bases:

As shown in Table S2, NaOMe found to be optimal base for the desired transformation.

Table S2: Optimization of Bases

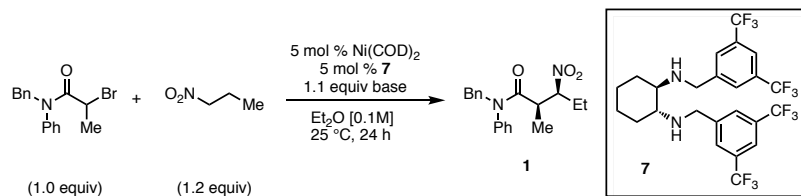

| Entry | Base                | % Yield<br>1 <sup>a</sup> | d.r<br><i>syn/anti</i> | % ee<br><i>syn</i> <sup>b</sup> |
|-------|---------------------|---------------------------|------------------------|---------------------------------|
| 1     | LiO <sup>t</sup> Bu | 56                        | 77:23                  | 18                              |
| 2     | LiOMe               | 17                        | 76:24                  | 37                              |
| 3     | NaO <sup>t</sup> Bu | 53                        | 79:21                  | 82                              |
| 4     | NaOMe               | 82                        | 85:15                  | 88                              |
| 5     | KOMe                | 75                        | 76:24                  | 88                              |
| 6     | KO <sup>t</sup> Bu  | 85                        | 76:24                  | 84                              |

<sup>a</sup>Yield determined by <sup>1</sup>H NMR using 1,3,5-trimethoxybenzene as an internal standard.

<sup>b</sup> Determined by chiral HPLC analysis

### Effect of Solvents:

As shown in Table S3, Et<sub>2</sub>O found to be optimal solvent for the desired transformation.

Table S3: Optimization of Solvents

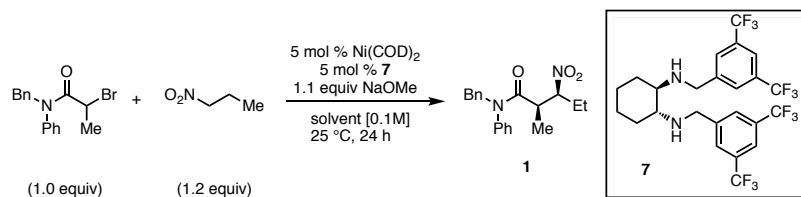

| Entry | Solvent           | % Yield<br>1 <sup>a</sup> | d.r<br><i>syn/anti</i> | % ee<br><i>syn</i> <sup>b</sup> |
|-------|-------------------|---------------------------|------------------------|---------------------------------|
| 1     | DMF               | 34                        | 60:40                  | 27                              |
| 2     | hexane            | 44                        | 82:18                  | 80                              |
| 3     | dioxane           | 70                        | 73:27                  | 82                              |
| 4     | DCM               | 23                        | 70:30                  | 84                              |
| 5     | benzene           | 45                        | 71:29                  | 84                              |
| 6     | THF               | 61                        | 74:26                  | 85                              |
| 7     | Et <sub>2</sub> O | 82                        | 85:15                  | 88                              |

<sup>a</sup>Yield determined by <sup>1</sup>H NMR using 1,3,5-trimethoxybenzene as an internal standard.

<sup>b</sup> Determined by chiral HPLC analysis

### Effect of $\alpha$ -Substitution on the Electrophile:

As outlined in Table S4 on switching methyl to ethyl group at the  $\alpha$  position of the electrophile drastically decreased the reactivity. Hence a better catalytic system was needed for this transformation.

Table S4: Comparison of Methyl vs Ethyl Substitution

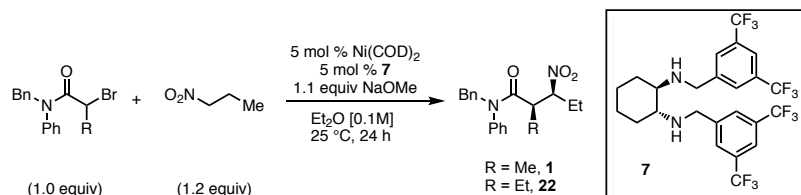

| Entry | R  | % Yield <sup>a</sup> | d.r.<br><i>syn/anti</i> | % ee<br><i>syn</i> <sup>b</sup> |
|-------|----|----------------------|-------------------------|---------------------------------|
| 1     | Me | 74                   | 81:19                   | 88                              |
| 2     | Et | 34                   | 62:38                   | 84                              |

<sup>a</sup>Yield determined by  $^1\text{H}$  NMR using 1,3,5-trimethoxybenzene as an internal standard.

<sup>b</sup>Determined by chiral HPLC analysis

### Effect of Internal Reductants:

As outlined in Table S5 Ni(II) precursor,  $\text{NiBr}_2$ -diglyme is reduced *in situ* to an active Ni(0) using several internal reductants.  $\text{Et}_2\text{Zn}$  was found to be the optimal reductant with excellent reactivity compared to the  $\text{Ni}(\text{COD})_2$  condition (Table S4). Importantly, under this catalytic condition diastereo- and enantioselectivity were comparable to the  $\text{Ni}(\text{COD})_2$  condition (Table S4).

Table S5: Survey of Different Reductants.

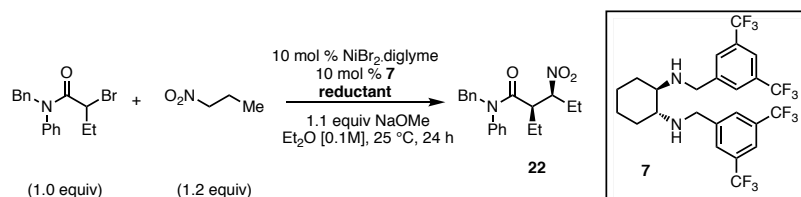

| Entry | Reductant                          | % Yield<br><b>22</b> <sup>a</sup> | d.r.<br><i>syn/anti</i> | % ee<br><i>syn</i> <sup>b</sup> |
|-------|------------------------------------|-----------------------------------|-------------------------|---------------------------------|
| 1     | none                               | <1                                | -                       | -                               |
| 2     | Zn (3.0 equiv)                     | <1                                | -                       | -                               |
| 3     | Mn (3.0 equiv)                     | <1                                | -                       | -                               |
| 4     | Ph-Bpin (20 mol %)                 | 12                                | 55:45                   | -                               |
| 5     | MeMgCl (20 mol %)                  | 76                                | 57:43                   | 80                              |
| 6     | MeMgCl (10 mol %)                  | 49                                | 59:41                   | 80                              |
| 7     | MeMgCl (5 mol %)                   | 18                                | 60:40                   | 82                              |
| 8     | $\text{Et}_2\text{Zn}$ (10 mol %)  | 48                                | 62:38                   | 40                              |
| 9     | $\text{Et}_2\text{Zn}$ (5 mol %)   | 88                                | 58:42                   | 69                              |
| 10    | $\text{Et}_2\text{Zn}$ (2.5 mol %) | 89                                | 62:38                   | 75                              |
| 11    | $\text{Et}_2\text{Zn}$ (1 mol %)   | 95                                | 60:40                   | 84                              |

<sup>a</sup>Yield determined by  $^1\text{H}$  NMR using 1,3,5-trimethoxybenzene as an internal standard.

<sup>b</sup>Determined by chiral HPLC analysis

### Effect of Single Component Catalyst on the Functionalized Nitroalkanes:

As outlined in Table S6, single component catalyst was effective for the functionalized nitroalkane.

Table S6: Comparison of Single Component Vs Multicomponent Catalyst With Functionalized Nitroalkane.

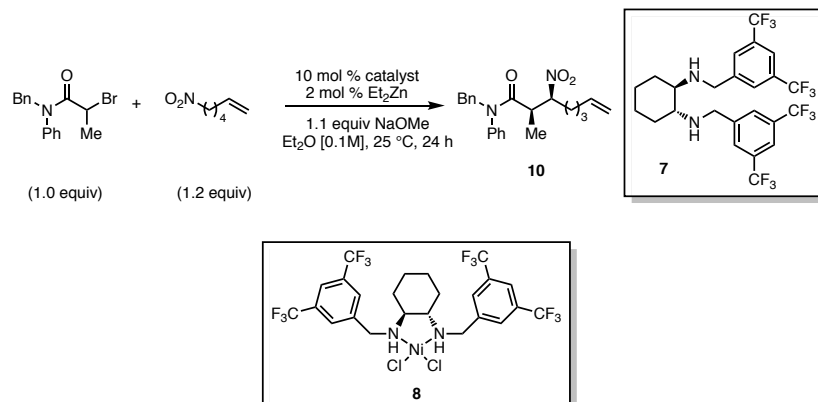

| Entry | catalyst                         | % Yield | d.r                      | % ee                          |
|-------|----------------------------------|---------|--------------------------|-------------------------------|
| 1     | NiCl <sub>2</sub> ·dme/ <b>7</b> | 25      | 95:05<br><i>syn/anti</i> | 88<br><i>syn</i> <sup>b</sup> |
| 2     | <b>8</b>                         | 70      | 88:12                    | 88                            |

<sup>a</sup>Yield determined by <sup>1</sup>H NMR using 1,3,5-trimethoxybenzene as an internal standard. <sup>b</sup> Determined by chiral HPLC analysis

### Effect of Catalyst Loading:

As outlined in Table S7, greater concentration of Ni(II) compared to Et<sub>2</sub>Zn is necessary for the efficient catalytic system. Presumably, this indicates that only a little low valent Ni generated is generated.

Table S7: Optimization of Catalyst Loading

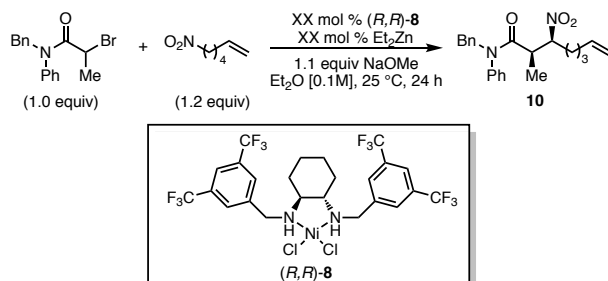

| Entry | <b>8</b> mol % | Et <sub>2</sub> Zn mol % | % Yield 10 <sup>a</sup> | d.r <i>syn/anti</i> | % ee <i>syn</i> <sup>b</sup> |
|-------|----------------|--------------------------|-------------------------|---------------------|------------------------------|
| 1     | 2.5            | 0.25                     | 2                       | -                   | -                            |
| 2     | 5              | 0.5                      | 23                      | 91:9                | 87                           |
| 3     | 10             | 1                        | 76                      | 89:11               | 87                           |
| 4     | 20             | 2                        | 90                      | 77:23               | 87                           |
| 5     | 2.5            | 1                        | 64                      | 81:19               | 87                           |
| 6     | 5              | 1                        | 65                      | 85:15               | 87                           |
| 7     | 10             | 1                        | 76                      | 88:12               | 87                           |
| 8     | 20             | 1                        | 48                      | 96:04               | 87                           |

<sup>a</sup>Yield determined by <sup>1</sup>H NMR using 1,3,5-trimethoxybenzene as an internal standard.

<sup>b</sup> Determined by chiral HPLC analysis

## 5. Preparation of Novel 1,2-Diamine Ligands

**Note:** All yields in this section are unoptimized.

Chiral 1,2 diamine ligands were synthesized based on previously published procedure.<sup>21</sup>

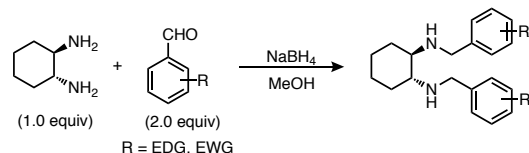

### General Protocol A:

A 25 mL oven-dried round-bottom flask equipped with a stirbar and rubber septum is cooled under a stream of nitrogen. The flask was opened to air, (1*R*,2*R*)-(-)-1,2-diaminocyclohexane (1.0 equiv) and anhydrous methanol were sequentially added under air. The rubber septum was replaced, purged with nitrogen for ca. 3 min and then aromatic aldehyde (2.0 equiv) was added dropwise over 3 minutes via syringe. The flask was fitted with condenser and refluxed (oil bath, 70 °C) for 1:30 h with stirring. The reaction was cooled to rt, and reflux condenser was removed. The reaction cooled to 0 °C in an ice-water bath, and NaBH<sub>4</sub> (2.1 equiv) was added portion-wise under air. After the vigorous effervescence subsided, the reaction flask was fitted with condenser and refluxed (oil bath, 70 °C) for 1 h with stirring. The reaction was then cooled to 0 °C in an ice-water bath and quenched the excess NaBH<sub>4</sub> by adding H<sub>2</sub>O until the bubbling subsides. The aqueous layer extracted with DCM (3x) and combined organic layers were dried over magnesium sulfate, filtered and the filtrate was concentrated *in vacuo*. The product was purified by silica gel flash chromatography.

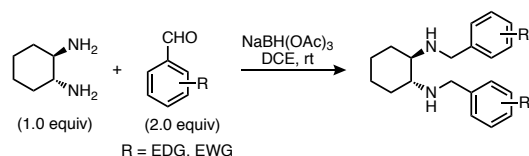

Several chiral 1,2 diamine ligands were synthesized by reductive amination using sodium triacetoxy borohydride.<sup>20</sup>

### General Protocol B:

A 100 mL oven-dried round-bottom flask equipped with a stirbar and rubber septum is cooled under a stream of nitrogen. The flask was opened to air, (1*R*,2*R*)-(-)-1,2-diaminocyclohexane (1.0 equiv) and anhydrous 1,2-dichloroethane were sequentially added under air. The rubber septum was replaced, purged with nitrogen for ca. 3 min and then aromatic aldehyde (2.0 equiv) was added dropwise over 3 minutes via syringe. The rubber septum was removed and NaBH(OAc)<sub>3</sub> (2.5 equiv) was added portion-wise over 10 minutes, septum replaced and stirred at rt overnight under nitrogen. The reaction mixture was quenched with NaHCO<sub>3</sub> extracted with DCM (3x) and combined organic layers were dried over magnesium sulfate, filtered and the filtrate was concentrated *in vacuo*. The product was purified by silica gel flash chromatography.

### Preparation of Ligands:

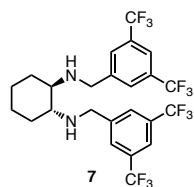

**(7):** According to general protocol B: (1*R*,2*R*)-(-)-1,2-diaminocyclohexane (500 mg, 4.38 mmol), 3,5-bis(trifluoromethyl)benzaldehyde, (1.44 mL, 8.77 mmol), and anhydrous 1,2 DCE (16.0 mL) were combined under air and NaBH(OAc)<sub>3</sub> (2.32 g, 11.0 mmol) was added portion-wise over 10 minutes and stirred at rt overnight. The reaction was worked up according to the general protocol B. The crude reaction was purified by flash silica gel chromatography (98:2 DCM : triethyl amine) to afford **7** (1.93 g, 78%). Note: Impure fractions can be further purified by recrystallization using EtOH/H<sub>2</sub>O mixture. [ $\alpha$ ]<sub>D</sub><sup>25</sup> = -45.0° (c = 1.00, CHCl<sub>3</sub>); <sup>1</sup>H NMR (600 MHz, CDCl<sub>3</sub>):  $\delta$  7.78 (s, 4H), 7.74 (s, 2H), 4.01 (d, *J* = 14.1 Hz, 2H), 3.81 (d, *J* = 14.0 Hz, 2H), 2.34 – 2.23 (m, 2H), 2.16 (dt, *J* = 13.9, 2.6 Hz, 2H), 1.86 (s, 2H), 1.75 (dtd, *J* = 9.8, 6.6, 6.1, 2.8 Hz, 2H), 1.32 – 1.19 (m, 2H), 1.11 – 0.99 (m, 2H); <sup>13</sup>C NMR (101 MHz, CDCl<sub>3</sub>)  $\delta$  143.8, 131.6 (q, *J* = 33 Hz), 128.0, 123.4 (q, *J* = 273 Hz), 120.9, 61.5, 50.2, 31.6, 24.8; <sup>19</sup>F NMR (565 MHz, CDCl<sub>3</sub>)  $\delta$  -63.01; FTIR (cm<sup>-1</sup>): 3258, 2933, 2866, 1493, 1382, 1281, 1127, 705; mp = 66-68 °C. HRMS (ESI) (M+H)<sup>+</sup> m/z calculated for [C<sub>24</sub>H<sub>23</sub>N<sub>2</sub>F<sub>12</sub>]<sup>+</sup>: 567.1670; found: 567.1659.

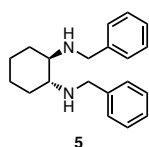

**(5):** According to general protocol A: (1*R*,2*R*)-(-)-1,2-diaminocyclohexane (500 mg, 4.4 mmol), benzaldehyde, (0.89 mL, 8.8 mmol), and anhydrous MeOH (3.0 mL) were combined under air and refluxed for 1:30 h with stirring. The solution allowed to cool to 0 °C in an ice-bath and NaBH<sub>4</sub> (347 mg, 9.2 mmol) was added portion-wise. After the vigorous effervescence had subsided the mixture was refluxed for 1 h with stirring. The reaction was worked up according to the general protocol A. The crude reaction was purified by flash silica

gel chromatography (98:2 DCM : triethyl amine) to afford **5** (1.00 g, 78%) as a viscous yellow oil. [ $\alpha$ ]<sub>D</sub><sup>25</sup> = -83.4° (c = 1.00, CHCl<sub>3</sub>); <sup>1</sup>H NMR (400 MHz, CDCl<sub>3</sub>):  $\delta$  7.29 – 7.21 (m, 8H), 7.21 – 7.15 (m, 2H), 3.84 (d, *J* = 13.2 Hz, 2H), 3.60 (d, *J* = 13.1 Hz, 2H), 2.26 – 2.16 (m, 2H), 2.11 (dt, *J* = 13.2, 2.5 Hz, 2H), 1.85 (s, 2H), 1.66 (dp, *J* = 9.3, 3.5 Hz, 2H), 1.26 – 1.10 (m, 2H), 1.05 – 0.91 (m, 2H); <sup>13</sup>C NMR (101 MHz, CDCl<sub>3</sub>)  $\delta$  141.0, 128.2, 127.9, 126.6, 60.8, 50.8, 31.4, 24.9; FTIR (cm<sup>-1</sup>): 3300, 2926, 2853, 1603, 1452, 1117, 1028, 857, 697. HRMS (ESI) (M+H)<sup>+</sup> m/z calculated for [C<sub>20</sub>H<sub>27</sub>N<sub>2</sub>]<sup>+</sup>: 295.2174; found: 295.2162.

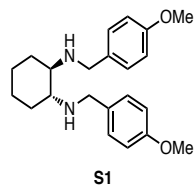

**(S1):** According to general protocol B: (1*R*,2*R*)-(-)-1,2-diaminocyclohexane (500 mg, 4.4 mmol), 4-methoxy benzaldehyde, (1.06 mL, 8.8 mmol), and anhydrous 1,2 DCE (16.0 mL) were combined under air and NaBH(OAc)<sub>3</sub> (2.32 g, 11.0 mmol) was added portion-wise over 10 minutes and stirred at rt overnight. The reaction was worked up according to the general protocol B. The crude reaction was purified by flash silica gel chromatography (98:2 DCM : triethyl amine) to afford **S1** as a white solid (1.10 g, 71%).

[ $\alpha$ ]<sub>D</sub><sup>25</sup> = -62.5° (c = 1.00, CHCl<sub>3</sub>); <sup>1</sup>H NMR (400 MHz, CDCl<sub>3</sub>):  $\delta$  7.25 – 7.20 (m, 4H), 6.87 – 6.81 (m, 4H), 3.83 (d, *J* = 12.9 Hz, 2H), 3.80 (s, 6H), 3.58 (d, *J* = 12.9 Hz, 2H), 2.27 – 2.18 (m, 2H), 2.15 (dt, *J* = 13.4, 2.8 Hz, 2H), 1.83 – 1.66 (m, 4H), 1.22 (tdd, *J* = 9.8, 3.4, 2.0 Hz, 2H), 1.01 (dq, *J* = 16.3, 6.7, 3.7 Hz, 2H); <sup>13</sup>C NMR (101 MHz, CDCl<sub>3</sub>)  $\delta$  164.4, 158.4, 133.2, 129.1, 113.6, 60.7, 55.2, 50.2, 31.5, 25.0; FTIR (cm<sup>-1</sup>): 3207, 2922, 1612, 1510, 1446, 1246, 1178, 1032, 817; mp = 78-80 °C. HRMS (ESI) (M+H)<sup>+</sup> m/z calculated for [C<sub>22</sub>H<sub>31</sub>N<sub>2</sub>O<sub>2</sub>]<sup>+</sup>: 355.2386; found: 355.2366.

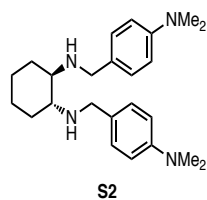

**(S2):** According to general protocol B: (1*R*,2*R*)-(-)-1,2-diaminocyclohexane (500 mg, 4.4 mmol), 4-(dimethylamino)benzaldehyde, (1.30 g, 8.8 mmol), and anhydrous 1,2 DCE (16.0 mL) were combined under air and NaBH(OAc)<sub>3</sub> (2.32 g, 11.0 mmol) was added portion-wise over 10 minutes and stirred at rt overnight. The reaction was worked up according to the general protocol B. The crude reaction was purified by flash silica gel chromatography (98:2 DCM : triethyl amine) to afford **S2** as a white solid (697 mg, 42%).

[ $\alpha$ ]<sub>D</sub><sup>25</sup> = -58.5° (c = 1.00, CHCl<sub>3</sub>); <sup>1</sup>H NMR (400 MHz, CDCl<sub>3</sub>):  $\delta$  7.20 – 7.16 (m, 4H), 6.73 – 6.67 (m, 4H), 3.82 (d, *J* = 12.8 Hz, 2H), 3.57 (d, *J* = 12.7 Hz, 2H), 2.93 (s, 12H), 2.36 – 2.22 (m, 2H), 2.22 – 2.09 (m, 2H), 1.79 – 1.65 (m, 2H), 1.22 (td, *J* = 9.7, 9.0, 4.9 Hz, 2H), 1.07 (d, *J* = 11.5 Hz, 2H); <sup>13</sup>C NMR (101 MHz, CDCl<sub>3</sub>)  $\delta$  149.7, 128.9, 112.7, 60.4, 50.0, 40.7, 31.2, 24.9; FTIR (cm<sup>-1</sup>): 3299, 2925, 1615, 1522, 1445, 1346, 1163, 947, 804; mp = 108-110 °C. HRMS (ESI) (M+H)<sup>+</sup> m/z calculated for [C<sub>24</sub>H<sub>37</sub>N<sub>4</sub>]<sup>+</sup>: 381.3018; found: 381.3003.



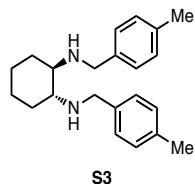

**(S3):** According to general protocol A: (1*R*,2*R*)-(-)-1,2-diaminocyclohexane (500 mg, 4.4 mmol), 4-methyl benzaldehyde, (1.04 mL, 8.8 mmol), and anhydrous MeOH (3.0 mL) were combined under air and refluxed for 1:30 h with stirring. The solution allowed to cool to 0 °C in an ice-bath and NaBH<sub>4</sub> (347 mg, 9.2 mmol) was added portion-wise. After the vigorous effervescence had subsided the mixture was refluxed for 1 h with stirring. The reaction was worked up according to the general protocol A. The crude reaction was purified by flash silica gel chromatography (98:2 DCM : triethyl amine) to afford **S3** (973 mg, 69%).  $[\alpha]_D^{25} = -78.0^\circ$  (*c* = 1.00, CHCl<sub>3</sub>); <sup>1</sup>H NMR (400 MHz, CDCl<sub>3</sub>): δ 7.20 (d, *J* = 8.0 Hz, 4H), 7.12 (d, *J* = 7.8 Hz, 4H), 3.87 (d, *J* = 13.0 Hz, 2H), 3.62 (d, *J* = 13.0 Hz, 2H), 2.33 (s, 6H), 2.31 – 2.22 (m, 4H), 2.16 (dq, *J* = 11.4, 2.4 Hz, 2H), 1.71 (tq, *J* = 15.8, 6.2, 4.6 Hz, 2H), 1.31 – 1.15 (m, 2H), 1.14 – 0.98 (m, 2H); <sup>13</sup>C NMR (101 MHz, CDCl<sub>3</sub>) δ 137.6, 136.3, 130.0, 128.0, 60.6, 50.4, 31.3, 24.9, 21.1; FTIR (cm<sup>-1</sup>): 3299, 2924, 1514, 1456, 1355, 1112, 803. HRMS (ESI) (M+H)<sup>+</sup> *m/z* calculated for [C<sub>22</sub>H<sub>31</sub>N<sub>2</sub>]<sup>+</sup>: 323.2487; found: 323.2479.

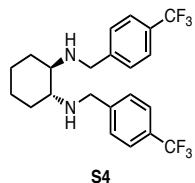

**(S4):** According to general protocol A: (1*R*,2*R*)-(-)-1,2-diaminocyclohexane (500 mg, 4.4 mmol), 4-(trifluoromethyl)benzaldehyde, (1.2 mL, 8.8 mmol), and anhydrous MeOH (3.0 mL) were combined under air and refluxed for 1:30 h with stirring. The solution allowed to cool to 0 °C in an ice-bath and NaBH<sub>4</sub> (347 mg, 9.2 mmol) was added portion-wise. After the vigorous effervescence had subsided the mixture was refluxed for 1 h with stirring. The reaction was worked up according to the general protocol A. The crude reaction was purified by flash silica gel chromatography (98:2 DCM : triethyl amine) to afford **S4** (1.41 g, 75%).  $[\alpha]_D^{25} = -62.2^\circ$  (*c* = 1.00, CHCl<sub>3</sub>); <sup>1</sup>H NMR (400 MHz, CDCl<sub>3</sub>): δ 7.56 (d, *J* = 8.0 Hz, 4H), 7.41 (d, *J* = 8.0 Hz, 4H), 3.94 (d, *J* = 13.7 Hz, 2H), 3.71 (d, *J* = 13.7 Hz, 2H), 2.30 – 2.19 (m, 2H), 2.15 (dt, *J* = 13.0, 2.4 Hz, 2H), 1.85 (s, 2H), 1.74 (dq, *J* = 8.4, 3.0 Hz, 2H), 1.32 – 1.14 (m, 2H), 1.12 – 0.95 (m, 2H); <sup>13</sup>C NMR (101 MHz, CDCl<sub>3</sub>) δ 145.1, 129.0 (q, *J* = 32 Hz), 128.15, 125.2 (q, *J* = 4 Hz), 124.2 (q, *J* = 272 Hz), 60.9, 50.3, 31.5, 24.9; <sup>19</sup>F NMR (565 MHz, CDCl<sub>3</sub>) δ -62.4; FTIR (cm<sup>-1</sup>): 3299, 2931, 1619, 1458, 1328, 1124, 823. HRMS (ESI) (M+H)<sup>+</sup> *m/z* calculated for [C<sub>22</sub>H<sub>25</sub>N<sub>2</sub>F<sub>6</sub>]<sup>+</sup>: 431.1922; found: 431.1908.

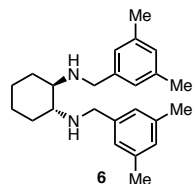

**(6):** According to general protocol B: (1*R*,2*R*)-(-)-1,2-diaminocyclohexane (500 mg, 4.38 mmol), 3,5-dimethylbenzaldehyde, (1.18 mL, 8.77 mmol), and anhydrous 1,2 DCE (16.0 mL) were combined under air and NaBH(OAc)<sub>3</sub> (2.32 g, 11.0 mmol) was added portion-wise over 10 minutes and stirred at rt overnight. The reaction was worked up according to the general protocol B. The crude reaction was purified by flash silica gel chromatography (98:2 DCM : triethyl amine) to afford **6** (0.890 mg, 58%) as yellow oil.  $[\alpha]_D^{25} = -59.2^\circ$  (*c* = 1.00, CHCl<sub>3</sub>); <sup>1</sup>H NMR (400 MHz, CDCl<sub>3</sub>): δ 6.95 (s, 4H), 6.87 (s, 2H), 3.83 (d, *J* = 12.8 Hz, 2H), 3.58 (d, *J* = 12.8 Hz, 2H), 2.29 (s, 14H), 2.17 (dt, *J* = 13.4, 2.5 Hz, 2H), 1.85 (s, 2H), 1.73 (qt, *J* = 9.7, 4.1 Hz, 2H), 1.33 – 1.18 (m, 2H), 1.15 – 1.00 (m, 2H); <sup>13</sup>C NMR (101 MHz, CDCl<sub>3</sub>) δ 141.0, 137.7, 128.3, 125.8, 61.1, 50.9, 31.6, 25.1, 21.2; FTIR (cm<sup>-1</sup>): 3300, 2924, 2854, 1607, 1458, 1118, 841. HRMS (ESI) (M+H)<sup>+</sup> *m/z* calculated for [C<sub>24</sub>H<sub>35</sub>N<sub>2</sub>]<sup>+</sup>: 351.2800; found: 351.2790.

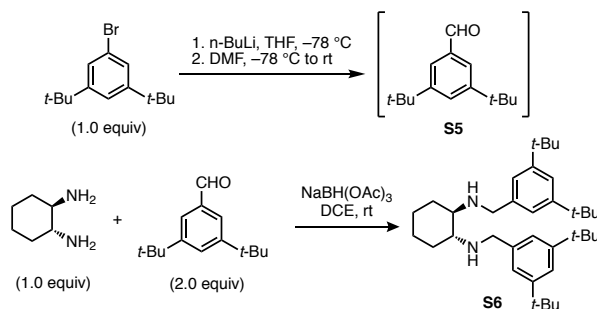

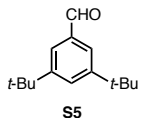

**(S5):** A flame-dried 100mL round bottomed flask equipped with a magnetic stir bar and a rubber septum was cooled under stream of N<sub>2</sub> for 10 minutes. 1-Bromo-3,5-di-*tert*-butylbenzene (4.0 g, 14.8 mmol), and anhydrous THF (24.0 mL) was added sequentially via syringe. The mixture was cooled to -78 °C in a dry-ice/acetone bath. *n*-BuLi (6.21 mL of a 2.62 M solution in hexane, 16.3 mmol) was added to the flask via syringe slowly, and the reaction allowed to stir for 45 minutes at -78 °C. After 45 minutes, at -78 °C, anhydrous DMF (1.48 mL, 19.2 mmol) was added into the reaction, warmed to rt, and stirred overnight. The rubber septum was removed, and the reaction was quenched with saturated aqueous NH<sub>4</sub>Cl (50.0 mL) and extracted into Et<sub>2</sub>O (75.0 mL). The aqueous layer was back extracted into Et<sub>2</sub>O (2x 30 mL). The combined organic layer was dried over magnesium sulfate, concentrated in vacuo to afford **S5** (3.05 g, 95%) as a viscous oil. The crude material was taken to the next step without further purification.

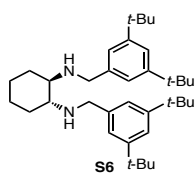

**(S6):** According to general protocol B: (1*R*,2*R*)-(-)-1,2-diaminocyclohexane (797 mg, 6.99 mmol), 3,5-di-*tert*-butylbenzaldehyde, (3.050 g, 14.0 mmol), and anhydrous 1,2-DCE (25.0 mL) were combined under air and NaBH(OAc)<sub>3</sub> (3.70 g, 17.5 mmol) was added portion-wise over 10 minutes and stirred at rt overnight. The reaction was worked up according to the general protocol B. The crude reaction was purified by flash silica gel chromatography (98:2 DCM : triethyl amine) to **S6** (2.46 g, 68%). [ $\alpha$ ]<sub>D</sub><sup>25</sup> = -37.3° (c = 1.00, CHCl<sub>3</sub>); <sup>1</sup>H NMR (400 MHz, CDCl<sub>3</sub>):  $\delta$  7.28 (t, *J* = 1.9 Hz, 2H), 7.14 (d, *J* = 1.9 Hz, 4H), 3.90 (d, *J* = 12.9 Hz, 2H), 3.65 (d, *J* = 12.9 Hz, 2H), 2.34 – 2.24 (m, 2H), 2.24 – 2.14 (m, 2H), 1.83 (s, 2H), 1.78 – 1.65 (m, 2H), 1.34 – 1.31 (m, 2H), 1.28 (s, 36H), 1.05 (d, *J* = 11.3 Hz, 2H); <sup>13</sup>C NMR (101 MHz, CDCl<sub>3</sub>)  $\delta$  150.5, 140.0, 122.3, 120.7, 61.0, 51.7, 34.7, 31.6, 31.5, 25.0; FTIR (cm<sup>-1</sup>): 2962, 2361, 1600, 1457, 1248, 871, 713; mp = 56-58 °C. HRMS (ESI) (M+H)<sup>+</sup> *m/z* calculated for [C<sub>36</sub>H<sub>59</sub>N<sub>2</sub>]<sup>+</sup>: 519.4678; found: 519.4663.

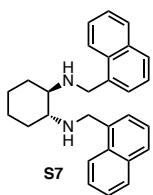

**(S7):** According to general protocol A: (1*R*,2*R*)-(-)-1,2-diaminocyclohexane (500 mg, 4.4 mmol), 1-naphthaldehyde, (1.2 mL, 8.8 mmol), and anhydrous MeOH (3.0 mL) were combined under air and refluxed for 1:30 h with stirring. The solution allowed to cool to 0 °C in an ice-bath and NaBH<sub>4</sub> (347 mg, 9.2 mmol) was added portion-wise. After the vigorous effervescence had subsided the mixture was refluxed for 1 h with stirring. The reaction was worked up according to the general protocol A. The crude reaction was purified by flash silica gel chromatography (98:2 DCM : triethyl amine) to afford **S7** (1.05 g, 61%) as thick viscous colorless oil. [ $\alpha$ ]<sub>D</sub><sup>25</sup> = -12.9° (c = 1.00, CHCl<sub>3</sub>); <sup>1</sup>H NMR (400 MHz, CDCl<sub>3</sub>):  $\delta$  8.01 (td, *J* = 8.5, 0.9 Hz, 2H), 7.84 – 7.79 (m, 2H), 7.73 (dd, *J* = 7.4, 2.0 Hz, 2H), 7.42 – 7.36 (m, 2H), 7.36 – 7.30 (m, 4H), 7.23 (ddd, *J* = 8.3, 6.9, 1.4 Hz, 2H), 4.31 (d, *J* = 12.9 Hz, 2H), 4.02 (d, *J* = 12.9 Hz, 2H), 2.42 – 2.29 (m, 4H), 1.86 – 1.73 (m, 2H), 1.66 (s, 2H), 1.41 – 1.24 (m, 2H), 1.13 (d, *J* = 11.5 Hz, 2H); <sup>13</sup>C NMR (101 MHz, CDCl<sub>3</sub>)  $\delta$  136.3, 133.7, 131.7, 128.4, 127.5, 125.8, 125.8, 125.4, 125.2, 123.8, 61.4, 48.7, 31.6, 25.1; FTIR (cm<sup>-1</sup>): 3299, 3045, 2925, 1597, 1509, 1456, 1115, 790. HRMS (ESI) (M+H)<sup>+</sup> *m/z* calculated for [C<sub>28</sub>H<sub>31</sub>N<sub>2</sub>]<sup>+</sup>: 395.2487; found: 395.2489.

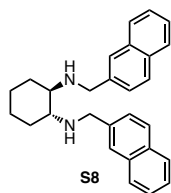

**(S8):** According to general protocol A: (1*R*,2*R*)-(-)-1,2-diaminocyclohexane (500 mg, 4.4 mmol), 2-naphthaldehyde, (1.2 mL, 8.8 mmol), and anhydrous MeOH (3.0 mL) were combined under air and refluxed for 1:30 h with stirring. The solution allowed to cool to 0 °C in an ice-bath and NaBH<sub>4</sub> (347 mg, 9.2 mmol) was added portion-wise. After the vigorous effervescence had subsided the mixture was refluxed for 1 h with stirring. The reaction was worked up according to the general protocol A. The crude reaction was purified by flash silica gel chromatography (98:2 DCM : triethyl amine) to afford **S8** (948 mg, 55%) as a white solid. [ $\alpha$ ]<sub>D</sub><sup>25</sup> = -13.8° (c = 1.00, CHCl<sub>3</sub>); <sup>1</sup>H NMR (400 MHz, CDCl<sub>3</sub>):  $\delta$  7.84 – 7.80 (m, 2H), 7.79 (s, 1H), 7.77 – 7.72 (m, 5H), 7.49 – 7.42 (m, 6H), 4.08 (d, *J* = 13.3 Hz, 2H), 3.83 (d, *J* = 13.3 Hz, 2H), 2.43 – 2.29 (m, 2H), 2.27 – 2.16 (m, 2H), 2.08 (s, 2H), 1.85 – 1.63 (m, 2H), 1.24 (td, *J* = 9.7, 9.1, 4.7 Hz, 2H), 1.16 – 1.00 (m, 2H); <sup>13</sup>C NMR (101 MHz, CDCl<sub>3</sub>)  $\delta$  136.3, 133.7, 131.7, 128.4, 127.5, 125.8, 125.8, 125.4, 125.2, 123.8, 61.4, 48.8, 31.6, 25.1; FTIR (cm<sup>-1</sup>): 3296, 3051, 2925, 1507, 1456, 1124, 855, 815, 790; mp = 72-74 °C. HRMS (ESI) (M+H)<sup>+</sup> *m/z* calculated for [C<sub>28</sub>H<sub>31</sub>N<sub>2</sub>]<sup>+</sup>: 395.2487; found: 395.2483.

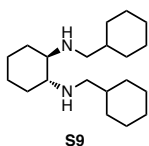

**(S9):** According to general protocol A: (1*R*,2*R*)-(-)-1,2-diaminocyclohexane (500 mg, 4.4 mmol), cyclohexanecarbaldehyde, (1.06 mL, 8.8 mmol), and anhydrous MeOH (3.0 mL) were combined under air and refluxed for 1:30 h with stirring. The solution allowed to cool to 0 °C in an ice-bath and NaBH<sub>4</sub> (347 mg, 9.2 mmol) was added portion-wise. After the vigorous effervescence had subsided the mixture was refluxed for 1 h with stirring. The reaction was worked up according to the general protocol A. The crude reaction was purified by flash silica gel chromatography (98:2 DCM : triethyl amine) to afford two diastereomerically pure products **S9** as a colorless oil (817 mg, 61%). [ $\alpha$ ]<sub>D</sub><sup>25</sup> = -60.0° (c = 1.00, CHCl<sub>3</sub>); <sup>1</sup>H NMR (400 MHz, CDCl<sub>3</sub>):  $\delta$  2.55 (dd, *J* = 11.4, 6.4 Hz, 2H), 2.23 (dd, *J* = 11.4, 6.8 Hz, 2H), 2.12 – 1.98 (m, 4H), 1.82 – 1.56 (m, 14H), 1.44 – 1.31 (m, 2H), 1.31 – 1.06 (m, 8H), 1.04 – 0.81 (m, 6H); <sup>13</sup>C NMR (101 MHz, CDCl<sub>3</sub>)  $\delta$  61.8, 53.7, 38.3, 31.7, 31.5, 31.4, 26.7, 26.0, 25.1; FTIR (cm<sup>-1</sup>): 3310, 2921, 2850, 1448, 1355, 1133, 730. HRMS (ESI) (M+H)<sup>+</sup> *m/z* calculated for [C<sub>20</sub>H<sub>38</sub>N<sub>2</sub>]<sup>+</sup>: 307.3035; found: 307.3109.

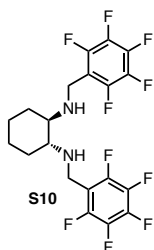

**(S10):** According to general protocol B: (1*R*,2*R*)-(-)-1,2-diaminocyclohexane (500 mg, 4.38 mmol), 2,3,4,5,6-pentafluorobenzaldehyde, (1.08 mL, 8.77 mmol), and anhydrous 1,2 DCE (16.0 mL) were combined under air and NaBH(OAc)<sub>3</sub> (2.32 g, 11.0 mmol) was added portion-wise over 10 minutes and stirred at rt overnight. The reaction was worked up according to the general protocol B. The crude reaction was purified by flash silica gel chromatography (98:2 DCM : triethyl amine) to afford **S10** as a white solid (1.22 g, 59%). [ $\alpha$ ]<sub>D</sub><sup>25</sup> = -38.0° (c = 1.00, CHCl<sub>3</sub>); <sup>1</sup>H NMR (400 MHz, CDCl<sub>3</sub>):  $\delta$  3.94 (d, *J* = 13.3 Hz, 2H), 3.79 (d, *J* = 13.2 Hz, 2H), 2.18 – 2.02 (m, 4H), 1.86 – 1.69 (m, 4H), 1.31 – 1.16 (m, 2H), 1.08 – 0.93 (m, 2H); <sup>13</sup>C NMR (101 MHz, CDCl<sub>3</sub>)  $\delta$  146.6 – 146.3 (m), 144.1 – 143.9 (m), 141.8 – 141.4 (m), 139.2 – 138.9 (m), 138.8 – 138.4 (m), 136.3 – 135.9 (m), 114.0 – 113.6 (m), 60.6, 37.9, 31.4, 24.8; <sup>19</sup>F NMR (565 MHz, CDCl<sub>3</sub>)  $\delta$  -144.7 (dd, *J* = 22.5, 8.5 Hz), -155.9 (t, *J* = 20.7 Hz), -162.3 (td, *J* = 22.3, 8.6 Hz); FTIR (cm<sup>-1</sup>): 3293, 2924, 2851, 1447, 1366, 1134, 888, 727; mp = 44-46 °C. HRMS (ESI) (M+H)<sup>+</sup> *m/z* calculated for [C<sub>20</sub>H<sub>17</sub>N<sub>2</sub>F<sub>10</sub>]<sup>+</sup>: 475.1232; found: 475.1219.

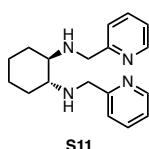

**(S11):** According to general protocol A: (1*R*,2*R*)-(-)-1,2-diaminocyclohexane (500 mg, 4.4 mmol), 2-pyridinecarboxaldehyde, (0.83 mL, 8.8 mmol), and anhydrous MeOH (3.0 mL) were combined under air and refluxed for 1:30 h with stirring. The solution allowed to cool to 0 °C in an ice-bath and NaBH<sub>4</sub> (347 mg, 9.2 mmol) was added portion-wise. After the vigorous effervescence had subsided the mixture was refluxed for 1 h with stirring. The reaction was worked up according to the general protocol A. The crude reaction was purified by flash silica gel chromatography (98:2 DCM : triethyl amine) to afford **S11** as a yellow oil (933 mg, 72%). [ $\alpha$ ]<sub>D</sub><sup>25</sup> = -61.6° (c = 1.00, CHCl<sub>3</sub>); <sup>1</sup>H NMR (400 MHz, CDCl<sub>3</sub>):  $\delta$  8.51 (d, *J* = 4.9 Hz, 2H), 7.61 (td, *J* = 7.7, 1.8 Hz, 2H), 7.39 (dt, *J* = 7.8, 1.1 Hz, 2H), 7.13 (ddd, *J* = 7.5, 4.8, 1.2 Hz, 2H), 4.02 (d, *J* = 14.1 Hz, 2H), 3.84 (d, *J* = 14.2 Hz, 2H), 2.44 (s, 2H), 2.36 – 2.27 (m, 2H), 2.14 (dt, *J* = 13.2, 2.5 Hz, 2H), 1.77 – 1.65 (m, 2H), 1.30 – 1.15 (m, 2H), 1.13 – 0.99 (m, 2H); <sup>13</sup>C NMR (101 MHz, CDCl<sub>3</sub>)  $\delta$  160.4, 148.9, 136.2, 122.1, 121.6, 61.1, 52.3, 31.4, 24.8; FTIR (cm<sup>-1</sup>): 3292, 2926, 2853, 1591, 1433, 1121, 993, 757. HRMS (ESI) (M+H)<sup>+</sup> *m/z* calculated for [C<sub>18</sub>H<sub>25</sub>N<sub>4</sub>]<sup>+</sup>: 297.2079; found: 297.2069.

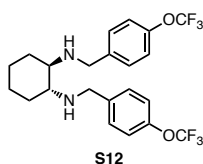

**(S12):** According to general protocol B: (1*R*,2*R*)-(-)-1,2-diaminocyclohexane (500 mg, 4.38 mmol), 4-(trifluoromethoxy)benzaldehyde, (1.25 mL, 8.77 mmol), and anhydrous 1,2 DCE (16.0 mL) were combined under air and NaBH(OAc)<sub>3</sub> (2.32 g, 11.0 mmol) was added portion-wise over 10 minutes and stirred at rt overnight. The reaction was worked up according to the general protocol B. The crude reaction was purified by flash silica gel chromatography (98:2 DCM : triethyl amine) to afford **S12** (1.29 g, 64%). [ $\alpha$ ]<sub>D</sub><sup>25</sup> = -62.9° (c = 1.00, CHCl<sub>3</sub>); <sup>1</sup>H NMR (400 MHz, CDCl<sub>3</sub>):  $\delta$  7.35 – 7.29 (m, 4H), 7.18 – 7.12 (m, 4H), 3.89 (d, *J* = 13.4 Hz, 2H), 3.65 (d, *J* = 13.4 Hz, 2H), 2.29 – 2.20 (m, 2H), 2.19 – 2.12 (m, 2H), 1.86 (s, 2H), 1.79 – 1.67 (m, 2H), 1.32 – 1.15 (m, 2H), 1.11 – 0.95 (m, 2H); <sup>13</sup>C NMR (101 MHz, CDCl<sub>3</sub>)  $\delta$  148.0, 139.8, 129.2, 120.9, 120.4 (q, *J* = 258 Hz), 60.9, 50.1, 31.5, 24.9; <sup>19</sup>F NMR (565 MHz, CDCl<sub>3</sub>)  $\delta$  -57.9; FTIR (cm<sup>-1</sup>): 3300, 2930, 2857, 1508, 1263, 1161, 920, 846. HRMS (ESI) (M+H)<sup>+</sup> *m/z* calculated for [C<sub>22</sub>H<sub>25</sub>N<sub>2</sub>O<sub>2</sub>F<sub>6</sub>]<sup>+</sup>: 463.1743; found: 463.1809.

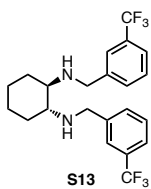

**(S13):** According to general protocol B: (1*R*,2*R*)-(-)-1,2-diaminocyclohexane (500 mg, 4.38 mmol), 3-(trifluoromethyl)benzaldehyde, (1.17 mL, 8.77 mmol), and anhydrous 1,2 DCE (16.0 mL) were combined under air and NaBH(OAc)<sub>3</sub> (2.32 g, 11.0 mmol) was added portion-wise over 10 minutes and stirred at rt overnight. The reaction was worked up according to the general protocol B. The crude reaction was purified by flash silica gel chromatography (98:2 DCM : triethyl amine) to afford **S13** (1.35 g, 72%) as a pale yellow oil.  $[\alpha]_D^{25} = -50.2^\circ$  ( $c = 1.00$ , CHCl<sub>3</sub>); <sup>1</sup>H NMR (400 MHz, CDCl<sub>3</sub>):  $\delta$  7.58 (s, 2H), 7.50 (dt,  $J = 8.3, 1.6$  Hz, 4H), 7.41 (t,  $J = 7.6$  Hz, 2H), 3.95 (d,  $J = 13.5$  Hz, 2H), 3.71 (d,  $J = 13.5$  Hz, 2H), 2.31 – 2.21 (m, 2H), 2.17 (dt,  $J = 13.1, 2.5$  Hz, 2H), 1.85 (s, 2H), 1.80 – 1.69 (m, 2H), 1.33 – 1.17 (m, 2H), 1.10 – 0.97 (m, 2H); <sup>13</sup>C NMR (101 MHz, CDCl<sub>3</sub>)  $\delta$  142.0, 131.3, 130.6 (q,  $J = 32$  Hz), 128.8, 124.6, 124.2 (q,  $J = 272$  Hz), 123.7, 61.1, 50.5, 31.6, 24.9; <sup>19</sup>F NMR (565 MHz, CDCl<sub>3</sub>)  $\delta$  - 62.6; FTIR (cm<sup>-1</sup>): 3298, 2930, 2857, 1449, 1329, 1123, 796, 702. HRMS (ESI) (M+H)<sup>+</sup>  $m/z$  calculated for [C<sub>22</sub>H<sub>25</sub>N<sub>2</sub>F<sub>6</sub>]<sup>+</sup>: 431.1743; found: 431.1913.

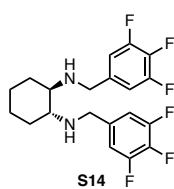

**(S14):** According to general protocol B: (1*R*,2*R*)-(-)-1,2-diaminocyclohexane (500 mg, 4.38 mmol), 3,4,5-trifluorobenzaldehyde, (0.99 mL, 8.77 mmol), and anhydrous 1,2 DCE (16.0 mL) were combined under air and NaBH(OAc)<sub>3</sub> (2.32 g, 11.0 mmol) was added portion-wise over 10 minutes and stirred at rt overnight. The reaction was worked up according to the general protocol B. The crude reaction was purified by flash silica gel chromatography (98:2 DCM : triethyl amine) to afford **S14** as a white solid (1.19 g, 68%).  $[\alpha]_D^{25} = -66.0^\circ$  ( $c = 1.00$ , CHCl<sub>3</sub>); <sup>1</sup>H NMR (400 MHz, CDCl<sub>3</sub>):  $\delta$  6.99 – 6.90 (m, 4H), 3.82 (d,  $J = 14.0$  Hz, 2H), 3.62 (d,  $J = 14.0$  Hz, 2H), 2.24 – 2.14 (m, 2H), 2.13 – 2.05 (m, 2H), 1.84 – 1.67 (m, 4H), 1.21 (t,  $J = 11.8, 7.9, 5.9$  Hz, 2H), 1.06 – 0.91 (m, 2H); <sup>13</sup>C NMR (101 MHz, CDCl<sub>3</sub>)  $\delta$  152.3 (dd,  $J = 10.0, 3.9$  Hz), 149.8 (dd,  $J = 9.9, 3.9$  Hz), 139.7 (t,  $J = 15.4$  Hz), 137.6 – 137.0 (m), 111.5 (d,  $J = 21.2$  Hz), 60.9, 49.7, 31.4, 24.8; <sup>19</sup>F NMR (565 MHz, CDCl<sub>3</sub>)  $\delta$  - 134.8 (d,  $J = 22$  Hz), -163.1 (t,  $J = 22$  Hz); FTIR (cm<sup>-1</sup>): 3294, 2930, 2863, 1618, 1526, 1444, 1226, 1038, 857; mp = 60-62 °C. HRMS (ESI) (M+H)<sup>+</sup>  $m/z$  calculated for [C<sub>20</sub>H<sub>21</sub>N<sub>2</sub>F<sub>6</sub>]<sup>+</sup>: 403.1609; found: 403.1611.

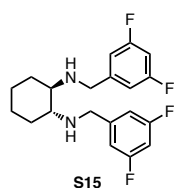

**(S15):** According to general protocol B: (1*R*,2*R*)-(-)-1,2-diaminocyclohexane (500 mg, 4.38 mmol), 3,5-difluorobenzaldehyde, (0.96 mL, 8.77 mmol), and anhydrous 1,2 DCE (16.0 mL) were combined under air and NaBH(OAc)<sub>3</sub> (2.32 g, 11.0 mmol) was added portion-wise over 10 minutes and stirred at rt overnight. The reaction was worked up according to the general protocol B. The crude reaction was purified by flash silica gel chromatography (98:2 DCM : triethyl amine) to afford **S15** (1.11 g, 70%) as yellow oil.  $[\alpha]_D^{25} = -60.0^\circ$  ( $c = 1.00$ , CHCl<sub>3</sub>); <sup>1</sup>H NMR (400 MHz, CDCl<sub>3</sub>):  $\delta$  6.89 – 6.81 (m, 4H), 6.67 (tt,  $J = 9.0, 2.4$  Hz, 2H), 3.87 (d,  $J = 14.0$  Hz, 2H), 3.66 (d,  $J = 14.0$  Hz, 2H), 2.27 – 2.17 (m, 2H), 2.16 – 2.08 (m, 2H), 1.84 (s, 2H), 1.78 – 1.67 (m, 2H), 1.30 – 1.14 (m, 2H), 1.01 (tdd,  $J = 17.0, 8.4, 4.0$  Hz, 2H); <sup>13</sup>C NMR (101 MHz, CDCl<sub>3</sub>)  $\delta$  164.2 (d,  $J = 12.8$  Hz), 161.7 (d,  $J = 12.8$  Hz), 145.3 (t,  $J = 8.5$  Hz), 111.4 – 109.6 (m), 102.1 (t,  $J = 25.5$  Hz), 60.8, 50.1, 31.5, 24.8; <sup>19</sup>F NMR (565 MHz, CDCl<sub>3</sub>)  $\delta$  -110.32; FTIR (cm<sup>-1</sup>): 2930, 2856, 1652, 1596, 1457, 1315, 1116, 1044, 847. HRMS (ESI) (M+H)<sup>+</sup>  $m/z$  calculated for [C<sub>20</sub>H<sub>23</sub>N<sub>2</sub>F<sub>4</sub>]<sup>+</sup>: 366.1719; found: 366.1791.

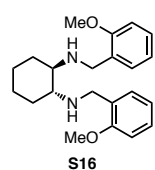

**(S16):** According to general protocol A: (1*R*,2*R*)-(-)-1,2-diaminocyclohexane (500 mg, 4.4 mmol), 2-methoxybenzaldehyde, (1.2 g, 8.8 mmol), and anhydrous MeOH (3.0 mL) were combined under air and refluxed for 1:30 h with stirring. The solution allowed to cool to 0 °C in an ice-bath and NaBH<sub>4</sub> (347 mg, 9.2 mmol) was added portion-wise. After the vigorous effervescence had subsided the mixture was refluxed for 1 h with stirring. The reaction was worked up according to the general protocol A. The crude reaction was purified by flash silica gel chromatography (99:1 DCM : triethyl amine) to afford **S16** (0.945 g, 61%).  $[\alpha]_D^{25} = -95.2^\circ$  ( $c = 1.00$ , CHCl<sub>3</sub>); <sup>1</sup>H NMR (600 MHz, CDCl<sub>3</sub>)  $\delta$  7.28 (dd,  $J = 7.4, 1.7$  Hz, 2H), 7.20 (td,  $J = 7.8, 1.8$  Hz, 2H), 6.90 (td,  $J = 7.4, 1.1$  Hz, 2H), 6.82 (dd,  $J = 8.2, 1.0$  Hz, 2H), 3.90 (d,  $J = 13.4$  Hz, 2H), 3.74 (s, 6H), 3.64 (d,  $J = 13.4$  Hz, 2H), 2.32 – 2.21 (m, 2H), 2.18 – 2.12 (m, 2H), 2.06 (s, 2H), 1.78 – 1.65 (m, 2H), 1.30 – 1.16 (m, 2H), 1.14 – 1.00 (m, 2H); <sup>13</sup>C NMR (151 MHz, CDCl<sub>3</sub>)  $\delta$  157.5, 129.3, 127.7, 120.2, 110.0, 61.0, 55.0, 45.9, 31.6, 25.1; FTIR (cm<sup>-1</sup>): 3300, 2930, 2855, 1604, 1492, 1242, 1105, 1029, 753. HRMS (ESI) (M+H)<sup>+</sup>  $m/z$  calculated for [C<sub>22</sub>H<sub>31</sub>N<sub>2</sub>O<sub>2</sub>]<sup>+</sup>: 355.2386; found: 355.2382.

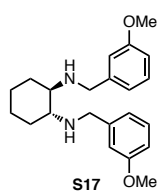

**(S17):** According to general protocol A: (1*R*,2*R*)-(-)-1,2-diaminocyclohexane (500 mg, 4.4 mmol), 3-methoxybenzaldehyde, (1.07 mL, 8.8 mmol), and anhydrous MeOH (3.0 mL) were combined under air and refluxed for 1:30 h with stirring. The solution allowed to cool to 0 °C in an ice-bath and NaBH<sub>4</sub> (347 mg, 9.2 mmol) was added portion-wise. After the vigorous effervescence had subsided the mixture was refluxed for 1 h with stirring. The reaction was worked up according to the general protocol A. The crude reaction was purified by flash silica gel chromatography (99:1 DCM : triethyl amine) to afford **S17** (1.13 g, 73%).  $[\alpha]_D^{25} = -61.2^\circ$  (c = 1.00, CHCl<sub>3</sub>); <sup>1</sup>H NMR (600 MHz, CDCl<sub>3</sub>): δ 7.21 (t, *J* = 7.8 Hz, 2H), 6.92 – 6.88 (m, 4H), 6.79 – 6.75 (m, 2H), 3.89 (d, *J* = 13.2 Hz, 2H), 3.76 (s, 6H), 3.64 (d, *J* = 13.2 Hz, 2H), 2.31 – 2.23 (m, 2H), 2.16 (d, *J* = 13.6, 2.6 Hz, 2H), 1.88 (s, 2H), 1.78 – 1.68 (m, 2H), 1.30 – 1.18 (m, 2H), 1.09 – 0.99 (m, 2H); <sup>13</sup>C NMR (151 MHz, CDCl<sub>3</sub>) δ 159.7, 142.8, 129.2, 120.3, 113.3, 112.3, 60.9, 55.0, 50.9, 31.6, 25.0; FTIR (cm<sup>-1</sup>): 2929, 2834, 1600, 1488, 1263, 1153, 1044, 781. HRMS (ESI) (M+H)<sup>+</sup> m/z calculated for [C<sub>22</sub>H<sub>31</sub>N<sub>2</sub>O<sub>2</sub>]<sup>+</sup>: 355.2386; found: 355.2376.

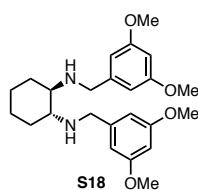

**(S18):** According to general protocol B: (1*R*,2*R*)-(-)-1,2-diaminocyclohexane (500 mg, 4.38 mmol), 3,5-dimethoxybenzaldehyde, (1.46 g, 8.77 mmol), and anhydrous 1,2 DCE (16.0 mL) were combined under air and NaBH(OAc)<sub>3</sub> (2.32 g, 11.0 mmol) was added portion-wise over 10 minutes and stirred at rt overnight. The reaction was worked up according to the general protocol B. The reaction was worked up according to the general protocol B. The crude reaction was purified by flash silica gel chromatography (98:2 DCM : triethyl amine) to afford **S18** (1.34 g, 74%) as a yellow oil.  $[\alpha]_D^{25} = -54.3^\circ$  (c = 1.00, CHCl<sub>3</sub>); <sup>1</sup>H NMR (400 MHz, CDCl<sub>3</sub>): δ 6.49 (d, *J* = 2.3 Hz, 4H), 6.33 (t, *J* = 2.3 Hz, 2H), 3.88 (d, *J* = 13.2 Hz, 2H), 3.73 (s, 12H), 3.61 (d, *J* = 13.3 Hz, 2H), 2.83 (s, 2H), 2.37 – 2.26 (m, 2H), 2.16 (d, *J* = 13.4, 2.6 Hz, 2H), 1.80 – 1.66 (m, 2H), 1.32 – 1.01 (m, 4H); <sup>13</sup>C NMR (101 MHz, CDCl<sub>3</sub>) δ 160.7, 142.6, 105.8, 98.9, 60.5, 55.1, 50.7, 31.1, 24.8; FTIR (cm<sup>-1</sup>): 3298, 2930, 2837, 1596, 1461, 1204, 1152, 1063, 857. HRMS (ESI) (M+H)<sup>+</sup> m/z calculated for [C<sub>24</sub>H<sub>35</sub>N<sub>2</sub>O<sub>4</sub>]<sup>+</sup>: 415.2597; found: 415.2587.

## 7. Preparation of Novel $\alpha$ -Bromo Amides:

**Note:** All yields in this section are unoptimized.

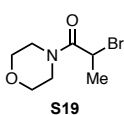

**(S19):** A hot 500 mL round bottom flask equipped with a magnetic stir bar and rubber septum was attached via needle to a double manifold and cooled under vacuum. The flask was evacuated and backfilled with  $N_2$  three times. Anhydrous THF (104.0 mL), triethylamine (8.0 mL, 57.4 mmol), and morpholine (5.02 mL, 57.4 mmol) were added to the flask sequentially via syringe and the reaction flask was cooled to 0 °C. 2-Bromopropionyl bromide (5.41 mL, 51.7 mmol) was added dropwise via syringe. Once the addition is complete, ice bath was removed and the reaction stirred overnight at rt. The septum was removed and the reaction was quenched with 1 M HCl (50.0 mL) and extracted with  $Et_2O$  (2x 50 mL). The combined organic layers are washed once with  $H_2O$  (50.0 mL). The organic layer was dried over magnesium sulfate, and concentrated in vacuo. The crude reaction was purified by flash silica gel chromatography (60:40 hexanes : ethyl acetate) to afford **S19** (8.3 g, 65% yield) as a colorless oil:  $^1H$  NMR (400 MHz,  $CDCl_3$ ):  $\delta$  4.51 (q,  $J$  = 6.6 Hz, 1H), 3.83 (ddd,  $J$  = 13.3, 5.2, 3.5 Hz, 1H), 3.77 – 3.66 (m, 3H), 3.62 (dt,  $J$  = 17.7, 3.8 Hz, 1H), 3.47 (dddd,  $J$  = 13.6, 10.6, 6.9, 4.0 Hz, 2H), 1.84 (d,  $J$  = 6.6 Hz, 3H);  $^{13}C$  NMR (101 MHz,  $CDCl_3$ )  $\delta$  167.6, 66.6, 66.2, 46.5, 42.5, 37.7, 21.5; FTIR ( $cm^{-1}$ ): 2970, 2857, 1653, 1434, 1375, 1248, 1115, 1029, 847. HRMS (ESI) ( $M+H$ ) $^+$  m/z calculated for  $[C_7H_{13}NO_2Br]^+$ : 222.00051; found: 222.01230.

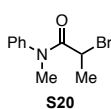

**(S20):** A hot 250 mL round bottom flask equipped with a magnetic stir bar and rubber septum was attached via needle to a double manifold and cooled under vacuum. The flask was evacuated and backfilled with  $N_2$  three times. Anhydrous THF (50.0 mL), triethylamine (3.8 mL, 27.5 mmol), and N-methylaniline (3.0 mL, 27.5 mmol) were added to the flask sequentially via syringe and the reaction flask was cooled to 0 °C. 2-Bromopropionyl bromide (2.61 mL, 25.0 mmol) was added dropwise via syringe. Once the addition is complete, ice bath was removed and the reaction stirred overnight at rt. The septum was removed and the reaction was quenched with 1 M HCl (50.0 mL) and extracted with  $Et_2O$  (2x 50 mL). The combined organic layers are washed once with  $H_2O$  (50.0 mL). The organic layer was dried over magnesium sulfate, and concentrated in vacuo. The crude reaction was purified by flash silica gel chromatography (90:10 hexanes : ethyl acetate) to afford **S20** (3.75 g, 62% yield) as off white solid:  $^1H$  NMR (400 MHz,  $CDCl_3$ ):  $\delta$  7.50 – 7.37 (m, 3H), 7.29 (d,  $J$  = 7.6 Hz, 2H), 4.27 (q,  $J$  = 6.7 Hz, 1H), 3.30 (s, 3H), 1.74 (d,  $J$  = 6.7 Hz, 3H);  $^{13}C$  NMR (101 MHz,  $CDCl_3$ )  $\delta$  169.5, 142.8, 129.9, 128.4, 127.1, 39.1, 38.1, 21.8; FTIR ( $cm^{-1}$ ): 2923, 1668, 1595, 1495, 1388, 1120, 700; mp = 35-37 °C. HRMS (ESI) ( $M+H$ ) $^+$  m/z calculated for  $[C_{10}H_{13}NOBr]^+$ : 242.0102; found: 242.0173.

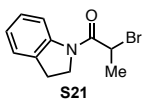

**(S21):** A hot 250 mL round bottom flask equipped with a magnetic stir bar and rubber septum was attached via needle to a double manifold and cooled under vacuum. The flask was evacuated and backfilled with  $N_2$  three times. Anhydrous THF (50.0 mL), triethylamine (3.8 mL, 27.5 mmol), and indoline (3.08 mL, 27.5 mmol) were added to the flask sequentially via syringe and the reaction flask was cooled to 0 °C. 2-Bromopropionyl bromide (2.61 mL, 25.0 mmol) was added dropwise via syringe. Once the addition is complete, ice bath was removed and the reaction stirred overnight at rt. The septum was removed and the reaction was quenched with 1 M HCl (30.0 mL) and extracted with ethyl acetate (2x 30 mL). The combined organic layers are washed once with  $H_2O$  (30.0 mL). The organic layer was dried over magnesium sulfate, and concentrated in vacuo. The crude reaction was purified by recrystallization using Ethyl acetate to afford **S21** (4.31 g, 68% yield) as pale brown crystalline solid:  $^1H$  NMR (400 MHz,  $DMSO-d_6$ ):  $\delta$  8.09 (d,  $J$  = 8.0 Hz, 1H), 7.27 (dd,  $J$  = 7.5, 1.4 Hz, 1H), 7.18 (t,  $J$  = 8.0 Hz, 1H), 7.05 (td,  $J$  = 7.4, 1.1 Hz, 1H), 4.98 (q,  $J$  = 6.5 Hz, 1H), 4.32 – 4.23 (m, 1H), 4.20 – 4.11 (m, 1H), 3.28 – 3.09 (m, 2H), 1.75 (d,  $J$  = 6.4 Hz, 3H);  $^{13}C$  NMR (101 MHz,  $DMSO-d_6$ )  $\delta$  166.9, 142.6, 132.2, 127.1, 125.0, 124.0, 116.4, 47.4, 42.6, 27.4, 21.3; FTIR ( $cm^{-1}$ ): 2923, 1647, 1594, 1480, 1370, 1162, 758; mp = 138-140 °C. HRMS (ESI) ( $M+H$ ) $^+$  m/z calculated for  $[C_{11}H_{13}NOBr]^+$ : 254.0102; found: 254.0169.

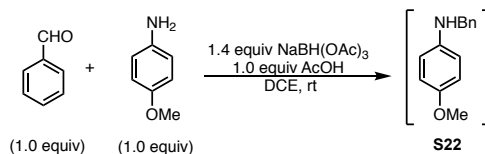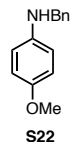

**(S22):** A 250 mL oven-dried round-bottom flask equipped with a stir bar and rubber septum is cooled under a stream of nitrogen. The flask was opened to air, 4-methoxy aniline (2.7 mL, 23.6 mmol) and anhydrous 1,2-dichloroethane (80.0 mL) were sequentially added under air. The rubber septum was replaced, purged with nitrogen for ca. 3 min and then benzaldehyde (2.4 mL, 23.6 mmol) was added dropwise over 3 minutes via syringe. The rubber septum was removed,  $\text{NaBH(OAc)}_3$  (7.0 g, 33 mmol) was added portion-wise over 15 minutes, and then acetic acid (1.35 mL, 23.6 mmol) was added slowly via pipette, septum replaced, and stirred at rt overnight under nitrogen. The reaction mixture was quenched with  $\text{NaHCO}_3$  extracted with DCM (3x 30 mL) and combined organic layers were dried over magnesium sulfate, filtered and the filtrate was concentrated in vacuo to afford **S22** (5.0g). The product was taken to the next step without further purification.

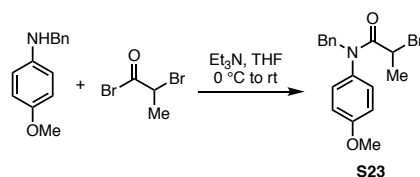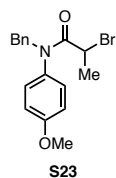

**(S23):** A hot 250 mL round bottom flask equipped with a magnetic stir bar and rubber septum was attached via needle to a double manifold and cooled under vacuum. The flask was backfilled with  $\text{N}_2$ , the septum was removed, and the **S22** (5.0 g, 23.2 mmol) was added. The septum was replaced, the flask was attached to a double manifold, and evacuated and backfilled with  $\text{N}_2$  three times. Anhydrous THF (45.0 mL), and triethylamine (3.56 mL, 25.5 mmol), were added to the flask sequentially via syringe and the reaction flask was cooled to 0 °C. 2-Bromopropionyl bromide (2.42 mL, 23.2mmol) was added dropwise via syringe. Once the addition is complete, ice bath was removed and the reaction stirred overnight at rt. The septum was removed and the reaction was quenched with 1 M HCl (50.0 mL) and extracted with  $\text{Et}_2\text{O}$  (2x 50 mL). The combined organic layers are washed once with  $\text{H}_2\text{O}$  (50.0 mL). The organic layer was dried over magnesium sulfate, and concentrated in vacuo. The crude reaction was purified by flash silica gel chromatography (95:05  $\rightarrow$  90:10 hexanes : ethyl acetate) to afford **S23** (5.25 g, 65% yield) as a colorless oil:  $^1\text{H NMR}$  (400 MHz,  $\text{CDCl}_3$ ):  $\delta$  7.31 – 7.23 (m, 3H), 7.21 – 7.17 (m, 2H), 6.95 (s, 2H), 6.86 – 6.80 (m, 2H), 4.94 (d,  $J = 14.1$  Hz, 1H), 4.75 (d,  $J = 14.2$  Hz, 1H), 4.25 (q,  $J = 6.7$  Hz, 1H), 3.80 (s, 3H), 1.76 (d,  $J = 6.6$  Hz, 3H);  $^{13}\text{C NMR}$  (101 MHz,  $\text{CDCl}_3$ )  $\delta$  169.7, 159.2, 136.8, 133.4, 129.2, 128.7, 128.3, 127.4, 114.5, 55.3, 53.5, 39.4, 21.6; FTIR ( $\text{cm}^{-1}$ ): 2932, 2850, 1668, 1511, 1444, 1251, 1180, 1038, 838. HRMS (ESI) ( $\text{M}+\text{H}$ ) $^+$   $m/z$  calculated for  $[\text{C}_{17}\text{H}_{19}\text{NO}_2\text{Br}]^+$ : 348.0599; found: 348.0593.

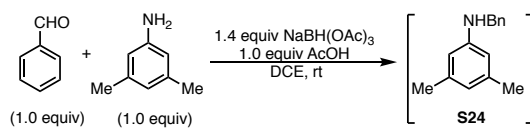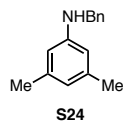

**(S24):** A 250 mL oven-dried round-bottom flask equipped with a stir bar and rubber septum is cooled under a stream of nitrogen. The flask was opened to air, 3,5-dimethyl aniline (2.95 mL, 23.6 mmol) and anhydrous 1,2-dichloroethane (80.0 mL) were sequentially added under air. The rubber septum was replaced, purged with nitrogen for ca. 3 min and then benzaldehyde (2.4 mL, 23.6 mmol) was added dropwise over 3 minutes via syringe. The rubber septum was removed,  $\text{NaBH(OAc)}_3$  (7.0 g, 33 mmol) was added portion-wise over 15 minutes, and then acetic acid (1.35 mL, 23.6 mmol) was added slowly via pipette, septum replaced, and stirred at rt overnight under nitrogen. The

reaction mixture was quenched with  $\text{NaHCO}_3$  extracted with DCM (3x 30 mL) and combined organic layers were dried over magnesium sulfate, filtered and the filtrate was concentrated in vacuo to afford **S24** (4.5 g). The product was taken to the next step without further purification.

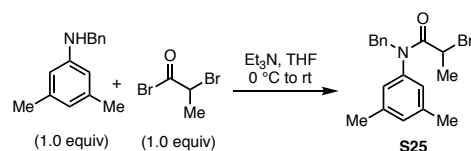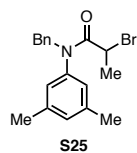

**(S25):** A hot 250 mL round bottom flask equipped with a magnetic stir bar and rubber septum was attached via needle to a double manifold and cooled under vacuum. The flask was backfilled with  $\text{N}_2$ , the septum was removed, and the **S24** (4.5 g, 21.2 mmol) was added. The septum was replaced, the flask was attached to a double manifold, and evacuated and backfilled with  $\text{N}_2$  three times. Anhydrous THF (40.0 mL), and triethylamine (3.25 mL, 23.3 mmol), were added to the flask sequentially via syringe and the reaction flask was cooled to 0 °C. 2-Bromopropionyl bromide (2.42 mL, 21.2 mmol) was added dropwise via syringe. Once the addition is complete, ice bath was removed and the reaction stirred overnight at rt. The septum was removed and the reaction was quenched with 1 M HCl (50.0 mL) and extracted with  $\text{Et}_2\text{O}$  (2x 50 mL). The combined organic layers are washed once with  $\text{H}_2\text{O}$  (50.0 mL). The organic layer was dried over magnesium sulfate, and concentrated in vacuo. The crude reaction was purified by flash silica gel chromatography (95:05  $\rightarrow$  90:10 hexanes : ethyl acetate) to afford **S25** (4.3 g, 62% yield) as a viscous yellow oil:  $^1\text{H}$  NMR (600 MHz,  $\text{CDCl}_3$ ):  $\delta$  7.31 – 7.22 (m, 3H), 7.23 – 7.18 (m, 2H), 6.96 (s, 1H), 6.66 (s, 2H), 4.94 (d,  $J$  = 14.3 Hz, 1H), 4.75 (d,  $J$  = 14.3 Hz, 1H), 4.28 (d,  $J$  = 6.7 Hz, 1H), 2.26 (s, 6H), 1.76 (d,  $J$  = 6.7 Hz, 3H);  $^{13}\text{C}$  NMR (101 MHz,  $\text{CDCl}_3$ )  $\delta$  169.5, 140.9, 139.3, 136.8, 130.1, 128.6, 128.3, 127.3, 125.5, 53.5, 39.5, 21.8, 21.0; FTIR ( $\text{cm}^{-1}$ ): 2920, 1668, 1594, 1399, 1236, 1184, 1061, 855, 710. HRMS (ESI) ( $\text{M}+\text{H}$ ) $^+$   $m/z$  calculated for  $[\text{C}_{17}\text{H}_{17}\text{NO}_2\text{Br}]^+$ : 346.0807; found: 346.0802.

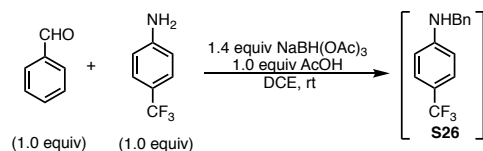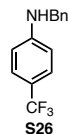

**(S26):** A 250 mL oven-dried round-bottom flask equipped with a stir bar and rubber septum is cooled under a stream of nitrogen. The flask was opened to air, 4-(trifluoromethyl) aniline (2.96 mL, 23.6 mmol) and anhydrous 1,2-dichloroethane (80.0 mL) were sequentially added under air. The rubber septum was replaced, purged with nitrogen for ca. 3 min and then benzaldehyde (2.4 mL, 23.6 mmol) was added dropwise over 3 minutes via syringe. The rubber septum was removed,  $\text{NaBH}(\text{OAc})_3$  (7.0 g, 33 mmol) was added portion-wise over 15 minutes, and then acetic acid (1.35 mL, 23.6 mmol) was added slowly via pipette, septum replaced, and stirred at rt overnight under nitrogen. The reaction mixture was quenched with  $\text{NaHCO}_3$  extracted with DCM (3x 30 mL) and combined organic layers were dried over magnesium sulfate, filtered and the filtrate was concentrated in vacuo to afford **S26** (5.0 g) as a yellow oil. The product was taken to the next step without further purification.



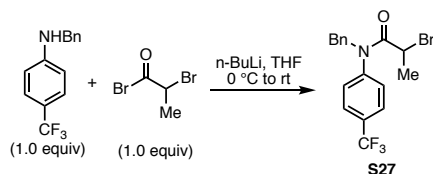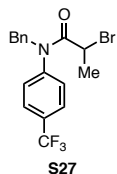

**(S27)**: A flame-dried 100mL round bottomed flask equipped with a magnetic stir bar and a rubber septum was cooled under stream of N<sub>2</sub> for 10 minutes. **S26** (5.0 g, 19.9 mmol), and anhydrous THF (40.0 mL) was added sequentially via syringe. The mixture was cooled to 0 °C in an ice bath. n-BuLi (8.64 mL of a 2.60 M solution in hexane, 21.9 mmol) was added to the flask via syringe slowly, and the reaction allowed to stir for 30 minutes at 0 °C. 2-Bromopropionyl bromide (2.3 mL, 21.9 mmol) was added dropwise via syringe. Once the addition is complete, ice bath was removed and the reaction stirred overnight at rt. The septum was removed and the reaction was quenched with saturated NH<sub>4</sub>Cl (50.0 mL) and extracted with Et<sub>2</sub>O (2x 50 mL). The combined organic layers are washed once with H<sub>2</sub>O (50.0 mL). The organic layer was dried over magnesium sulfate, and concentrated in vacuo. The crude reaction was purified by flash silica gel chromatography (95:05 → 90:10 hexanes : ethyl acetate) to afford **S27** (2.5 g, 33% yield) as a pale yellow solid: <sup>1</sup>H NMR (600 MHz, CDCl<sub>3</sub>): δ 7.62 (d, *J* = 8.2 Hz, 2H), 7.32 – 7.27 (m, 3H), 7.23 – 7.16 (m, 4H), 5.00 (d, *J* = 14.4 Hz, 1H), 4.80 (d, *J* = 14.4 Hz, 1H), 4.13 (q, *J* = 6.6 Hz, 1H), 1.79 (d, *J* = 6.6 Hz, 3H); <sup>13</sup>C NMR (101 MHz, CDCl<sub>3</sub>) δ 169.2, 144.2, 136.3, 130.8 (q, *J* = 33 Hz), 128.9, 128.8, 128.7, 127.9, 126.9, 123.6 (q, *J* = 273 Hz), 53.6, 39.1, 21.7; <sup>19</sup>F NMR (565 MHz, CDCl<sub>3</sub>) δ -63.6; FTIR (cm<sup>-1</sup>): 2928, 1672, 1613, 1324, 1169, 1069, 851; mp = 48-50 °C. HRMS (ESI) (M+H)<sup>+</sup> *m/z* calculated for [C<sub>17</sub>H<sub>16</sub>NOBrF<sub>3</sub>]<sup>+</sup>: 386.0367; found: 386.0369.

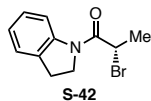

**S-42**: A hot 100 mL round bottom flask equipped with a magnetic stir bar and rubber septum was purged with a stream of nitrogen until cool. Indoline (1.1 mL, 9.8 mmol), (S)-(-)-2-bromopropanoic acid (0.88 mL, 9.80 mmol), DCM (33.0 mL), and triethylamine (1.37 mL, 9.8 mmol), were added to the flask sequentially via syringe and the reaction flask was cooled to 0 °C in an ice bath. The rubber septum was removed, HATU (4.1 g, 10.8 mmol) was added portion-wise over 3 min, septum replaced and stirred at 0 °C for 2 hours and upon completion (as monitored by TLC) the reaction was quenched with brine (30 mL) and diluted with DCM (30 mL). The resulting biphasic mixture was then transferred to separatory funnel and the layers were separated. The organic layer was washed with brine (2x 30 mL), dried over magnesium sulfate, filtered through a glass frit and concentrated in vacuo to give crude product. The crude reaction was purified by recrystallization using DCM to afford **S-42** (1.27 g, 51% yield) as white crystalline solid. The <sup>1</sup>H NMR and <sup>13</sup>C NMR matches with racemic **S21**; mp = 138-140 °C; [α]<sub>D</sub><sup>24</sup> = +143.0° (c = 1.00, CHCl<sub>3</sub>) HRMS (ESI) (M+H)<sup>+</sup> *m/z* calculated for [C<sub>11</sub>H<sub>13</sub>NOBr]<sup>+</sup>: 254.0102; found: 254.0169.

**R-42** was prepared based on the above procedure and <sup>1</sup>H, <sup>13</sup>C, NMR matches with racemic **S21** and **R-42**; specific rotation [α]<sub>D</sub><sup>24</sup> = -143.0°.

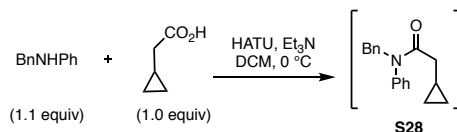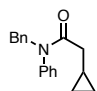

**(S28)**: A hot 100 mL round bottom flask equipped with a magnetic stir bar and rubber septum was purged with a stream of nitrogen until cool. N-Benzylaniline (2.0 g, 11.0 mmol), cyclopropyl acetic acid (1.0 g, 10.0 mmol), DCM (33.0 mL), and diisopropylethylamine (5.2 mL, 30.0 mmol), were added to the flask sequentially via syringe and the reaction flask was cooled to 0 °C in an ice bath. The rubber septum was removed, HATU (4.5 g, 12.0 mmol) was added portion-wise over 3 min, septum replaced and stirred at rt for 2 hours and upon completion (as monitored by TLC) the reaction was quenched with brine (30 mL) and diluted with DCM (30 mL). The resulting biphasic mixture was then transferred to separatory funnel and the layers were separated. The organic layer was washed with brine (2x 30 mL),

dried over magnesium sulfate, filtered through a glass frit and concentrated in vacuo to give crude product. The crude reaction was partially purified by flash silica gel chromatography (95:05 → 90:10 hexanes : ethyl acetate) to afford of slightly impure **S28** (1.72 g). The product was taken to the next step without further purification.

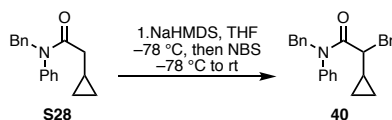

**(40)**: A flame-dried 100mL round bottomed flask equipped with a magnetic stir bar and a rubber septum was cooled under stream of N<sub>2</sub> for 10 minutes. **S28** (1.0 g, 3.76 mmol), and anhydrous THF (35 mL) was added sequentially via syringe. The mixture was cooled to -78 °C in a dry-ice/acetone bath. NaHMDS (2.8 mL of a 2.0 M solution in THF, 5.64 mmol) was added to the flask via syringe slowly, and the reaction allowed to stir for 45 minutes at to -78 °C. N-Bromosuccinimide (0.8 g, 4.5 mmol) was dissolved in 8 mL THF and then, the solution was added dropwise via syringe. Once the addition is complete, dry-ice/acetone bath was removed and the reaction stirred overnight at rt. The septum was removed and the reaction was quenched with saturated H<sub>2</sub>O (50.0 mL) and extracted with EtOAc (2x 100 mL). The combined organic layers are washed once with H<sub>2</sub>O (50.0 mL). The organic layer was dried over magnesium sulfate, and concentrated in vacuo. The crude reaction was purified by flash silica gel chromatography (95:05 hexanes : ethyl acetate) to afford **40** (0.672 g, 52% yield) as a white solid: <sup>1</sup>H NMR (400 MHz, CDCl<sub>3</sub>): δ 7.35 – 7.31 (m, 3H), 7.30 – 7.26 (m, 3H), 7.20 (dd, *J* = 7.3, 2.2 Hz, 2H), 7.07 – 6.98 (m, 2H), 5.03 (d, *J* = 14.2 Hz, 1H), 4.77 (d, *J* = 14.3 Hz, 1H), 3.38 (d, *J* = 10.3 Hz, 1H), 1.83 (dddd, *J* = 12.9, 10.0, 8.1, 4.9 Hz, 1H), 0.89 – 0.81 (m, 1H), 0.81 – 0.72 (m, 1H), 0.28 – 0.14 (m, 2H); <sup>13</sup>C NMR (101 MHz, CDCl<sub>3</sub>) δ 168.5, 141.0, 136.7, 129.7, 128.8, 128.6, 128.4, 128.2, 127.5, 53.4, 51.2, 16.1, 9.2, 6.8; FTIR (cm<sup>-1</sup>): 3062, 1667, 1594, 1498, 1409, 1178, 699; mp = 103-105 °C; HRMS (ESI) (M+H)<sup>+</sup> *m/z* calculated for [C<sub>18</sub>H<sub>19</sub>NOBr]<sup>+</sup>: 344.0572; found: 344.0638.

## 7. Preparation of Novel Starting Nitroalkanes

**Note:** All yields in this section are unoptimized.

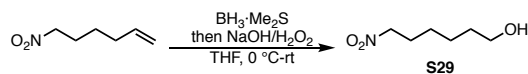

**(S29):** A flame-dried 250 mL round bottom flask equipped with a magnetic stir bar and a rubber septum was charged with the 6-nitrohex-1-ene (3.0 g, 23.2 mmol) and the flask was purged with a stream of nitrogen for 5 minutes and cooled to 0 °C in an ice-water bath. Anhydrous THF (100 mL) was added via syringe. Borane-dimethylsulfide complex (~18.0 mL of a 2M solution in THF, 34.8 mmol) was added to the flask slowly via syringe. The mixture was stirred at 0 °C for 25 minutes, then warmed to rt and stirred for 4 hours. The mixture was stirred was cooled to 0 °C in an ice-water bath and 3M NaOH (12 mL, 34.8 mmol) was added slowly via syringe (*caution: vigorous gas evolution*). Next, 30% aqueous  $\text{H}_2\text{O}_2$  (4.0 mL) was added via syringe. The mixture was warmed to rt and stirred overnight. The septum was removed, and the mixture was diluted EtOAc (80 mL) and the layer were separated. The organic layer was washed with brine (50 mL). The combined aqueous layers were extracted with EtOAc (50 mL). The combined organic layers were again washed with brine (50 mL), dried with magnesium sulfate, filtered and concentrated in vacuo. The crude reaction was purified by flash silica gel chromatography (70:30 hexanes : ethyl acetate) to afford **S29** (2.5 g, 74% yield) as a colorless oil:  $^1\text{H}$  NMR (600 MHz,  $\text{CDCl}_3$ ):  $\delta$  4.39 (t,  $J$  = 7.0 Hz, 2H), 3.65 (t,  $J$  = 6.5 Hz, 2H), 2.14 – 1.84 (m, 2H), 1.58 (tdd,  $J$  = 6.9, 5.4, 2.6 Hz, 2H), 1.43 (p,  $J$  = 3.7 Hz, 4H);  $^{13}\text{C}$  NMR (151 MHz,  $\text{CDCl}_3$ )  $\delta$  75.5, 62.4, 32.2, 27.3, 26.0, 25.0; FTIR ( $\text{cm}^{-1}$ ): 3355, 2935, 1551, 1434, 1383, 1055, 733. HRMS (ESI) ( $\text{M}+\text{H}$ ) $^+$   $m/z$  calculated for  $[\text{C}_6\text{H}_{14}\text{NO}_3]^+$ : 148.0895; found: 148.0962.

## 8. Synthesis of the Single-Component Precatalyst **8** and X-ray Structure

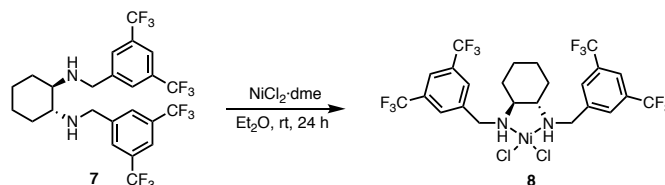

A 100 mL oven-dried round-bottom flask equipped with magnetic stir bar was sealed with a septum and cooled under a stream of nitrogen. The septum was partly removed and the diamine ligand **7** (1.36 g, 2.4 mmol) and anhydrous  $\text{NiCl}_2 \cdot \text{dme}$  (0.54 g, 2.4 mmol) were added. The septum was replaced, purged with nitrogen for ca. 3 min and anhydrous  $\text{Et}_2\text{O}$  (64 mL) was added under nitrogen. The reaction mixture was stirred under nitrogen at rt for 24 h. The reaction was concentrated under reduced pressure and the contents were dissolved in DCM (10 mL). The insoluble particles were removed using filtration through filter paper and product recrystallized by vapor diffusion (DCM/hexanes) to afford green crystals. X-ray quality crystals were obtained by slow evaporation of saturated solution of complex **8** in toluene. The complex **8** crystallized as tetrameric species. To further characterize **8**, the DCM was decanted and the green crystals were washed with hexane. The crystals were transferred to a new vial via spatula and crushed to provide a green powder. The resulting complex **8** was dried under vacuum to afford 1.43 g, 85 % yield. Anal. Calculated: C, 41.42%; H, 3.48%; N, 4.02%; Found: C, 41.32%; H, 3.15%; N, 4.95%. mp = >300 °C. HRMS (LIFDI) ( $\text{M}$ ) $^+$   $m/z$ , calculated for  $[\text{C}_{24}\text{H}_{22}\text{Cl}_2\text{F}_{12}\text{N}_2\text{Ni}]^+$ : 694.0322; found: 694.0334.

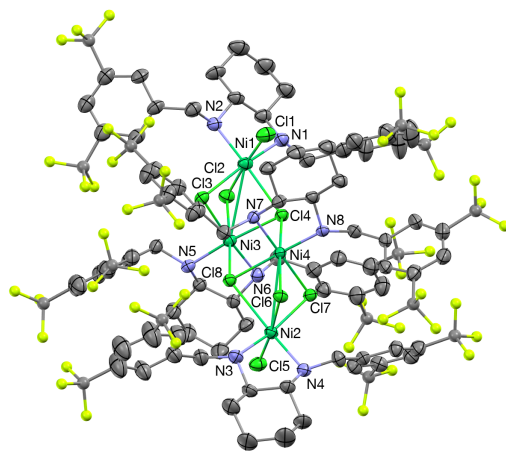

X-ray Structure of **8** (Tetramer in Solid State)

## 9. Description of Thermoelectric Cooling Block

It is important to mention that the asymmetric alkylation of nitroalkane reaction was air sensitive and attempts to run the reaction on the bench-top adversely affected the yield. Consequently, the reaction was performed in the oxygen-free glove box. The enantioselectivity of the reaction was slightly higher at 0 °C, hence we designed and built a thermoelectric cooling block which could be used inside the glove box. The pictorial representation of the cooling block is depicted below.

The low cost solid state cooling apparatus capable of chilling magnetically stirred sample vials in an inert glovebox without the potential to introduce moisture or other contaminants to the environment.

At the center of the cooling unit is an aluminum block with multiple machined holes designed to hold sample vials. Cooling is achieved by thermoelectric elements mounted on either side of the block. The cold side of each thermoelectric element is mounted to opposite ends of the cooling block and the warm side of each element is mounted to a heatsink and fan assembly designed to remove heat and allow for optimal cooling. A thermocouple is mounted onto the top of the cooling block to provide temperature measurement. The thermoelectric elements and fans are powered by a single 12Vdc power supply. In this configuration, the thermoelectric elements are running at full power and will lower the temperature of the block to a uniform temperature approximately 30 °C below the interior temperature of the glovebox. The entire apparatus can be easily placed on top of a magnetic stir plate. The close proximity between the stir bar in the bottom of the vial and the top of the stir plate allows for strong magnetic coupling ensuring consistent and reliable stirring.

Details of thermoelectric cooling block is provided below and specific part numbers of items are included for reference however, similar parts from other manufacturer serve the same purpose.

The thermoelectric element, fan and heatsink were purchased as a complete set from Adafruit.com (Part number 1135). The element is a 12VDC 5A thermoelectric Peltier part number TEC1-12706. Binzet model 1210 power supply was used but any generic 12VDC 10 Amp power supply can be used.

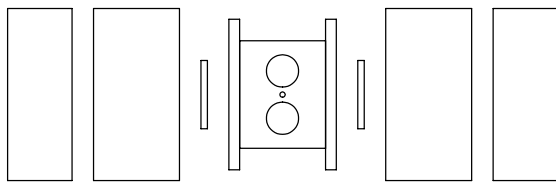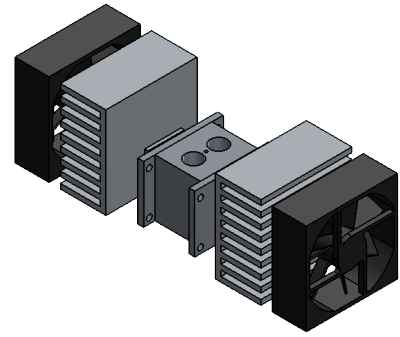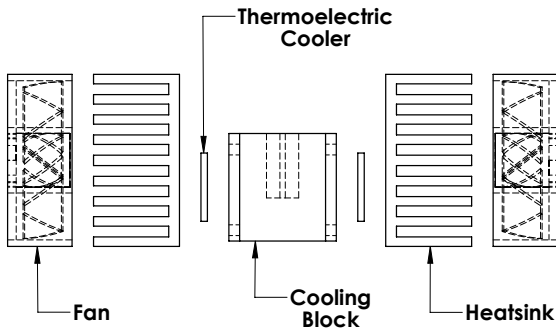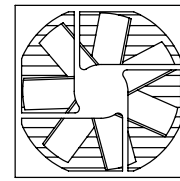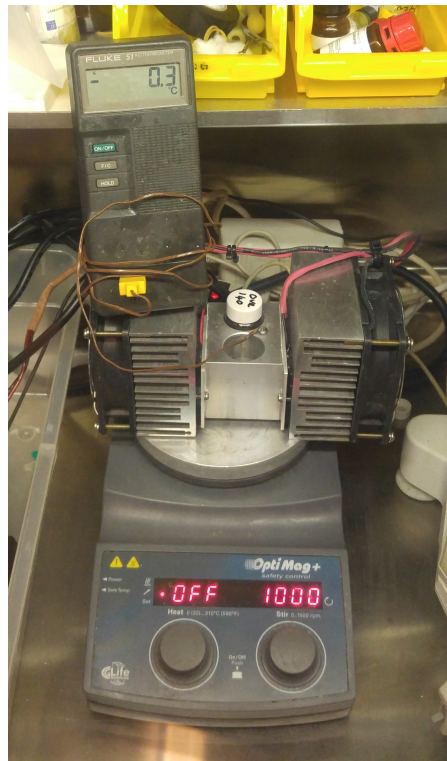

## 10. Asymmetric Alkylation of Nitroalkanes

**General Protocol C:** Synthesis of enantioenriched  $\beta$ -nitroamide at 0 °C (5 min prestirring): In a nitrogen-filled glovebox, **8** (0.1 equiv) and anhydrous Et<sub>2</sub>O (4.0 mL) was added into a 20 mL vial containing magnetic stir bar, which was sealed with a Teflon-lined screw cap and the resulting mixture was stirred at rt for 30 min. In a separate 20 mL vial, base (1.1 equiv), nitroalkane (1.2 equiv), anhydrous Et<sub>2</sub>O (4.0 mL), and stir bar were added sequentially, the vial was capped with a Teflon-lined screw cap. The resulting suspension then stirred at rt for 5 min. After 5 min, the electrophile (1.0 equiv) was added as a solid (unless otherwise noted) to vial containing nitronate anion, and was cooled to 0 °C. Et<sub>2</sub>Zn was then added into the vial containing catalyst, stirred for 2 minutes at rt, and then was cooled to 0 °C. The resulting brown, homogeneous catalyst solution was transferred to vial containing nitronate anion via pipette; followed by 2.0 mL Et<sub>2</sub>O rinse. The reaction mixture was then stirred vigorously at 0 °C for indicated time (ca. 20-26 h). Once completed, the reaction was warmed to rt and removed from the glovebox. The reaction mixture was then opened to air, diluted with Et<sub>2</sub>O (10 mL) and filtered through Celite, which was then rinsed with Et<sub>2</sub>O (15 mL). The filtrate was concentrated *in vacuo* and the crude reaction was purified by silica gel flash chromatography.

**General Protocol D:** Synthesis of enantioenriched  $\beta$ -nitroamide at 0 °C (30 min prestirring): In a nitrogen-filled glovebox, **8** (0.1 equiv) and anhydrous Et<sub>2</sub>O (4.0 mL) was added into a 20 mL vial containing magnetic stir bar, which was sealed with a Teflon-lined screw cap and the resulting mixture was stirred at rt for 30 min. In a separate 20 mL vial, base (1.1 equiv), nitroalkane (1.2 equiv), anhydrous Et<sub>2</sub>O (4.0 mL), and stir bar were added sequentially, the vial was capped with a Teflon-lined screw cap. The resulting suspension then stirred at rt for 30 min. After 30 min, the electrophile (1.0 equiv) was added as a solid (unless otherwise noted) to vial containing nitronate anion, and was cooled to 0 °C. Et<sub>2</sub>Zn was then added into the vial containing catalyst, stirred for 2 minutes at rt, and then was cooled to 0 °C. The resulting brown, homogeneous catalyst solution was transferred to vial containing nitronate anion via pipette; followed by 2.0 mL Et<sub>2</sub>O rinse. The reaction mixture was then stirred vigorously at 0 °C for indicated time (ca. 20-26 h). Once completed, the reaction was warmed to room temperature and removed from the glovebox. The reaction mixture was then opened to air, diluted with Et<sub>2</sub>O (10 mL) and filtered through Celite, which was then rinsed with Et<sub>2</sub>O (15 mL). The filtrate was concentrated *in vacuo* and the crude reaction was purified by silica gel flash chromatography.

**General Protocol E:** Synthesis of enantioenriched  $\beta$ -nitroamide at rt (5 min prestirring): In a nitrogen-filled glovebox, **8** (0.1 equiv) and anhydrous Et<sub>2</sub>O (4.0 mL) was added into a 20 mL vial containing magnetic stir bar, which was sealed with a Teflon-lined screw cap and the resulting mixture was stirred at rt for 30 min. In a separate 20 mL vial, base (1.1 equiv), nitroalkane (1.2 equiv), anhydrous Et<sub>2</sub>O (4.0 mL), and stir bar were added sequentially, the vial was capped with a Teflon-lined screw cap. The resulting suspension then stirred at rt for 5 min. After 5 min, the electrophile (1.0 equiv) was added as a solid (unless otherwise noted) to vial containing nitronate anion. Et<sub>2</sub>Zn was then added into the vial containing catalyst, stirred for 2 minutes at rt. The resulting brown, homogeneous catalyst solution was transferred to vial containing nitronate anion via pipette; followed by 2.0 mL Et<sub>2</sub>O rinse. The reaction mixture was then stirred vigorously at rt for indicated time (ca. 20-26 h). Once completed, the reaction was warmed to room temperature and removed from the glovebox. The reaction mixture was then opened to air, diluted with Et<sub>2</sub>O (10 mL) and filtered through Celite, which was then rinsed with Et<sub>2</sub>O (15 mL). The filtrate was concentrated *in vacuo* and the crude reaction was purified by silica gel flash chromatography.

### Asymmetric Alkylation Reactions:

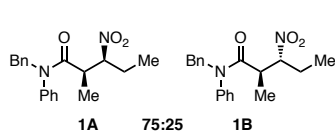

(1) According to general protocol C: **8** (34.7 mg, 0.05 mmol), N-benzyl-2-bromo-N-phenylpropanamide (318 mg, 1.0 mmol), 1-nitropropane (107  $\mu$ L, 1.2 mmol), sodium methoxide (59.4 mg, 1.1 mmol), diethyl zinc (1 M in hexane, 0.01 mmol, 10  $\mu$ L) and anhydrous Et<sub>2</sub>O (10.0 mL) were combined under N<sub>2</sub> cooled to 0 °C with rapid stirring for 24 h. The reaction was worked up according to the general protocol. NMR analysis of the crude reaction mixture revealed a 75:25 mixture

of syn and anti isomers. The crude reaction was purified by flash silica gel chromatography (95:5 → 90:10 hexanes : ethyl acetate) to afford two diastereomerically pure products **1** (290 mg, 89% combined).

**1A** (syn diastereomer) (91%ee, 221 mg, 68%, clear oil): The enantiomeric excess was determined to be 91% by chiral HPLC analysis (CHIRALPAK IB, 1.0 mL/min, 0.8% *i*-PrOH/hexane,  $\lambda=220$  nm);  $t_R$ (major) = 13.858 min,  $t_R$ (minor) = 15.236 min.  $[\alpha]_D^{24}=-49.2^\circ$  ( $c = 1.00$ ,  $\text{CHCl}_3$ );  $^1\text{H NMR}$  (600 MHz,  $\text{CDCl}_3$ ):  $\delta$  7.40 – 7.34 (m, 3H), 7.31 – 7.23 (m, 3H), 7.19 – 7.12 (m, 2H), 6.95 – 6.89 (m, 2H), 4.87 (q, 2H), 4.70 (td,  $J = 10.6$ , 3.1 Hz, 1H), 2.82 (dq,  $J = 10.3$ , 6.7 Hz, 1H), 1.85 (dq,  $J = 14.9$ , 7.5, 3.1 Hz, 1H), 1.77 (ddq,  $J = 14.3$ , 10.8, 7.2 Hz, 1H), 1.08 (d,  $J = 6.6$  Hz, 3H), 0.92 (t,  $J = 7.3$  Hz, 3H);  $^{13}\text{C NMR}$  (151 MHz,  $\text{CDCl}_3$ )  $\delta$  171.9, 141.2, 136.9, 130.0, 128.9, 128.7, 128.5, 128.4, 127.7, 93.4, 53.2, 41.0, 25.8, 15.7, 10.4; FTIR ( $\text{cm}^{-1}$ ): 2974, 2881, 1653, 1545, 1405, 1200, 812, 700. HRMS (ESI) ( $\text{M}+\text{H}$ ) $^+$   $m/z$  calculated for  $[\text{C}_{19}\text{H}_{23}\text{N}_2\text{O}_3]^+$ : 327.1703; found: 327.1704.

**1B** (anti diastereomer) (83%ee, 70 mg, 21%, off-white solid): The enantiomeric excess was determined to be 83% by chiral HPLC analysis (CHIRALPAK IB, 1.0 mL/min, 0.8% *i*-PrOH/hexane,  $\lambda=220$  nm);  $t_R$ (major) = 36.585 min,  $t_R$ (minor) = 40.556 min.  $[\alpha]_D^{24}=+54.5^\circ$  ( $c = 1.00$ ,  $\text{CHCl}_3$ );  $^1\text{H NMR}$  (600 MHz,  $\text{CDCl}_3$ ):  $\delta$  7.38 – 7.30 (m, 3H), 7.29 – 7.20 (m, 3H), 7.15 – 7.09 (m, 2H), 7.11 – 7.05 (m, 2H), 4.90 (d,  $J = 14.3$  Hz, 1H), 4.86 (ddd,  $J = 10.1$ , 8.7, 3.5 Hz, 1H), 4.78 (d,  $J = 14.3$  Hz, 1H), 3.01 (dq,  $J = 10.1$ , 7.0 Hz, 1H), 1.96 (dq,  $J = 14.9$ , 7.5, 3.6 Hz, 1H), 1.67 (ddq,  $J = 14.7$ , 8.8, 7.3 Hz, 1H), 1.06 (d,  $J = 7.0$  Hz, 3H), 0.85 (t,  $J = 7.4$  Hz, 3H);  $^{13}\text{C NMR}$  (151 MHz,  $\text{CDCl}_3$ )  $\delta$  172.9, 141.4, 137.1, 129.6, 128.7, 128.6, 128.4, 128.3, 127.4, 90.5, 53.2, 39.2, 23.9, 14.5, 9.3; FTIR ( $\text{cm}^{-1}$ ): 2975, 1653, 1545, 1407, 1259, 810, 700; mp = 101-103 °C. HRMS (ESI)  $m/z$  calculated for  $[\text{C}_{19}\text{H}_{23}\text{N}_2\text{O}_3]^+$  ( $\text{M}+\text{H}$ ) $^+$ : 327.1703; found: 327.1704.

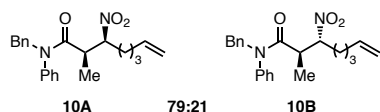

**(10)** According to general protocol C: **8** (69.4 mg, 0.1 mmol), N-benzyl-2-bromo-N-phenylpropionamide (318 mg, 1.0 mmol), 1-nitrohexene (164  $\mu\text{L}$ , 1.2 mmol), sodium methoxide (59.4 mg, 1.1 mmol), diethyl zinc (1 M in hexane, 0.02 mmol, 20  $\mu\text{L}$ ) and anhydrous  $\text{Et}_2\text{O}$  (10.0 mL) were combined under  $\text{N}_2$  cooled to 0 °C with rapid stirring for 24 h. The reaction was worked up according to the general protocol. NMR analysis of the crude reaction mixture revealed a 79:21 mixture of syn and anti isomers. The crude reaction was purified by flash silica gel chromatography (100:0 → 95:05 hexanes : ethyl acetate) to afford two diastereomerically pure products **10** (307 mg, 84% combined).

**10A** (syn diastereomer) (91%ee, 241 mg, 66%, clear oil): The enantiomeric excess was determined to be 91% by chiral HPLC analysis (CHIRALPAK IC, 1.0 mL/min, 2.0% *i*-PrOH/hexane,  $\lambda=210$  nm);  $t_R$ (major) = 18.968 min,  $t_R$ (minor) = 15.837 min.  $[\alpha]_D^{24}=-30.1^\circ$  ( $c = 1.00$ ,  $\text{CHCl}_3$ );  $^1\text{H NMR}$  (600 MHz,  $\text{CDCl}_3$ ):  $\delta$  7.37 (dp,  $J = 5.5$ , 2.0 Hz, 3H), 7.29 – 7.26 (m, 3H), 7.19 – 7.12 (m, 2H), 6.94 – 6.86 (m, 2H), 5.73 (ddt,  $J = 17.0$ , 10.2, 6.7 Hz, 1H), 5.06 – 4.93 (m, 3H), 4.81 – 4.70 (m, 2H), 2.81 (dq,  $J = 10.3$ , 6.7 Hz, 1H), 2.14 – 1.97 (m, 2H), 1.82 – 1.70 (m, 2H), 1.49 – 1.36 (m, 1H), 1.37 – 1.26 (m, 1H), 1.08 (d,  $J = 6.6$  Hz, 3H);  $^{13}\text{C NMR}$  (151 MHz,  $\text{CDCl}_3$ )  $\delta$  171.8, 141.2, 137.4, 137.0, 130.0, 129.0, 128.7, 128.5, 128.4, 127.7, 115.5, 91.8, 53.3, 41.1, 32.8, 31.7, 24.9, 15.6; FTIR ( $\text{cm}^{-1}$ ): 3064, 2929, 1653, 1549, 1405, 1262, 915, 701. HRMS (ESI) ( $\text{M}+\text{H}$ ) $^+$   $m/z$  calculated for  $[\text{C}_{22}\text{H}_{27}\text{N}_2\text{O}_3]^+$ : 367.2016; found: 327.2014.

**10B** (anti diastereomer) (79%ee, 66 mg, 18%, clear oil): The enantiomeric excess was determined to be 79% by chiral HPLC analysis (CHIRALPAK IB, 1.0 mL/min, 0.8% *i*-PrOH/hexane,  $\lambda=210$  nm);  $t_R$ (major) = 31.082 min,  $t_R$ (minor) = 28.802 min.  $[\alpha]_D^{24}=+50.3^\circ$  ( $c = 1.00$ ,  $\text{CHCl}_3$ );  $^1\text{H NMR}$  (600 MHz,  $\text{CDCl}_3$ ):  $\delta$  7.38 – 7.32 (m, 3H), 7.29 – 7.21 (m, 3H), 7.14 – 7.10 (m, 2H), 7.10 – 7.02 (m, 2H), 5.68 (ddt,  $J = 16.9$ , 10.2, 6.7 Hz, 1H), 5.00 – 4.92 (m, 2H), 4.92 – 4.84 (m, 2H), 4.78 (d,  $J = 14.3$  Hz, 1H), 2.99 (dq,  $J = 10.1$ , 7.0 Hz, 1H), 2.10 – 1.95 (m, 2H), 1.88 – 1.79 (m, 1H), 1.64 (dtd,  $J = 14.8$ , 9.8, 5.1 Hz, 1H), 1.34 (ddd,  $J = 16.3$ , 13.5, 10.9, 6.5 Hz, 2H), 1.06 (d,  $J = 7.0$  Hz, 3H);  $^{13}\text{C NMR}$  (151 MHz,  $\text{CDCl}_3$ )  $\delta$  172.8, 141.3, 137.3, 137.0, 129.6, 128.7, 128.3, 128.3, 127.4, 89.3, 53.1, 39.8, 32.7, 30.0, 24.1, 14.5; FTIR ( $\text{cm}^{-1}$ ): 3064, 2930, 1653, 1548, 1409, 1251, 916, 701. HRMS (ESI) ( $\text{M}+\text{H}$ ) $^+$   $m/z$  calculated for  $[\text{C}_{22}\text{H}_{27}\text{N}_2\text{O}_3]^+$ : 367.2016; found: 367.2015.

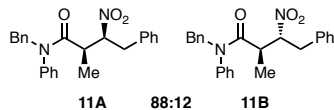

**(11)** According to general protocol E: **8** (34.7 mg, 0.05 mmol), N-benzyl-2-bromo-N-phenylpropionamide (318 mg, 1.0 mmol), 2-phenylnitroethane (181 mg, 1.2 mmol), sodium methoxide (59.4 mg, 1.1 mmol), diethyl zinc (1 M in hexane, 0.01 mmol, 10  $\mu$ L) and anhydrous Et<sub>2</sub>O (10.0 mL) were combined under N<sub>2</sub> and stirred rapidly at rt for 24 h. The reaction was worked up according to the general protocol. NMR analysis of the crude reaction mixture revealed an 88:12 mixture of syn and anti isomers. The crude reaction was purified by flash silica gel chromatography (95:05  $\rightarrow$  85:15 hexanes : ethyl acetate) to afford two diastereomerically pure products **11** (321 mg, 83% combined).

**11A** (syn diastereomer) (87%ee, 274 mg, 71%, clear oil): The enantiomeric excess was determined to be 87% by chiral HPLC analysis (CHIRALPAK IA, 1.0 mL/min, 5.0% *i*-PrOH/hexane,  $\lambda$ =220 nm);  $t_R$ (major) = 11.475 min,  $t_R$ (minor) = 10.712 min.  $[\alpha]_D^{24} = -58.2^\circ$  (c = 1.00, CHCl<sub>3</sub>); <sup>1</sup>H NMR (600 MHz, CDCl<sub>3</sub>):  $\delta$  7.39 (p,  $J$  = 3.5 Hz, 2H), 7.31 – 7.21 (m, 6H), 7.21 – 7.16 (m, 2H), 7.15 – 7.10 (m, 2H), 6.95 (dd,  $J$  = 6.6, 3.0 Hz, 2H), 5.04 – 4.94 (m, 2H), 4.83 (d,  $J$  = 14.1 Hz, 1H), 3.14 (dd,  $J$  = 14.3, 2.9 Hz, 1H), 3.00 – 2.87 (m, 3H), 1.11 (d,  $J$  = 6.7 Hz, 3H); <sup>13</sup>C NMR (151 MHz, CDCl<sub>3</sub>)  $\delta$  171.7, 141.1, 136.9, 135.4, 128.9, 128.7, 128.6, 128.5, 128.4, 127.7, 127.4, 93.3, 53.3, 41.1, 38.4, 15.5; FTIR (cm<sup>-1</sup>): 3031, 2980, 1652, 1553, 1456, 1258, 859, 747. HRMS (ESI) (M+H)<sup>+</sup>  $m/z$  calculated for [C<sub>24</sub>H<sub>25</sub>N<sub>2</sub>O<sub>3</sub>]<sup>+</sup>: 389.1859; found: 389.1860.

**11B** (anti diastereomer) (68%ee, 47 mg, 12%, clear oil): The enantiomeric excess was determined to be 68% by chiral HPLC analysis (CHIRALPAK IA, 1.0 mL/min, 5.0% *i*-PrOH/hexane,  $\lambda$ =254 nm);  $t_R$ (major) = 23.708 min,  $t_R$ (minor) = 13.292 min.  $[\alpha]_D^{24} = +46.5^\circ$  (c = 1.00, CHCl<sub>3</sub>); <sup>1</sup>H NMR (600 MHz, CDCl<sub>3</sub>):  $\delta$  7.35 – 7.28 (m, 3H), 7.27 – 7.20 (m, 6H), 7.14 – 7.09 (m, 2H), 7.04 – 6.98 (m, 4H), 5.09 (td,  $J$  = 9.4, 3.8 Hz, 1H), 4.92 (d,  $J$  = 14.3 Hz, 1H), 4.75 (d,  $J$  = 14.4 Hz, 1H), 3.21 (dd,  $J$  = 14.7, 3.8 Hz, 1H), 3.04 (dq,  $J$  = 9.7, 6.9 Hz, 1H), 2.91 (dd,  $J$  = 14.7, 9.0 Hz, 1H), 1.18 (d,  $J$  = 6.9 Hz, 3H); <sup>13</sup>C NMR (151 MHz, CDCl<sub>3</sub>)  $\delta$  172.6, 141.3, 137.0, 134.9, 129.6, 128.7, 128.7, 128.7, 128.4, 128.3, 127.4, 127.4, 90.5, 53.1, 39.6, 36.9, 14.6; FTIR (cm<sup>-1</sup>): 3648, 2360, 1653, 1558, 1456, 1250, 858, 699. HRMS (ESI) (M+H)<sup>+</sup>  $m/z$  calculated for [C<sub>24</sub>H<sub>25</sub>N<sub>2</sub>O<sub>3</sub>]<sup>+</sup>: 389.1859; found: 389.1861.

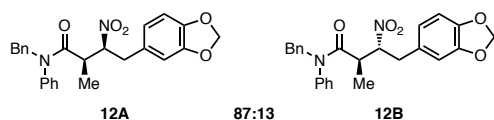

**(12)** According to general protocol C: **8** (69.4 mg, 0.1 mmol), N-benzyl-2-bromo-N-phenylpropionamide (318 mg, 1.0 mmol), 5-(2-nitroethyl)benzo[1,3]dioxole (234 mg, 1.2 mmol), sodium methoxide (59.4 mg, 1.1 mmol), diethyl zinc (1 M in hexane, 0.02 mmol, 20  $\mu$ L) and anhydrous Et<sub>2</sub>O (10.0 mL) were

combined under N<sub>2</sub> cooled to 0 °C with rapid stirring for 24 h. The reaction was worked up according to the general protocol. NMR analysis of the crude reaction mixture revealed a 83:17 mixture of syn and anti isomers. The crude reaction was purified by flash silica gel chromatography (90:10  $\rightarrow$  80:20 hexanes : ethyl acetate) to afford two diastereomerically pure products **12** (346 mg, 80% combined).

**12A** (syn diastereomer) (89%ee, 295 mg, 68%, clear oil): The enantiomeric excess was determined to be 89% by chiral HPLC analysis (CHIRALPAK IA, 1.0 mL/min, 3.0% *i*-PrOH/hexane,  $\lambda$ =220 nm);  $t_R$ (major) = 31.504 min,  $t_R$ (minor) = 34.915 min.  $[\alpha]_D^{24} = -77.5^\circ$  (c = 1.00, CHCl<sub>3</sub>); <sup>1</sup>H NMR (600 MHz, CDCl<sub>3</sub>):  $\delta$  7.44 – 7.36 (m, 3H), 7.32 – 7.25 (m, 3H), 7.19 (dd,  $J$  = 7.3, 2.3 Hz, 2H), 7.00 – 6.91 (m, 2H), 6.70 (d,  $J$  = 7.9 Hz, 1H), 6.63 (d,  $J$  = 1.7 Hz, 1H), 6.57 (dd,  $J$  = 7.9, 1.7 Hz, 1H), 5.93 (s, 2H), 4.99 – 4.91 (m, 2H), 4.84 (d,  $J$  = 14.1 Hz, 1H), 3.05 (dd,  $J$  = 14.2, 2.8 Hz, 1H), 2.92 – 2.84 (m, 2H), 1.11 (d,  $J$  = 6.7 Hz, 3H); <sup>13</sup>C NMR (151 MHz, CDCl<sub>3</sub>)  $\delta$  171.6, 147.9, 146.9, 141.0, 136.9, 130.0, 129.0, 128.9, 128.8, 128.5, 128.4, 127.7, 121.9, 109.0, 108.4, 101.0, 93.6, 53.3, 41.0, 38.2, 15.5; FTIR (cm<sup>-1</sup>): 2979, 1652, 1550, 1492, 1249, 1039, 701. HRMS (ESI) (M+H)<sup>+</sup>  $m/z$  calculated for [C<sub>25</sub>H<sub>25</sub>N<sub>2</sub>O<sub>5</sub>]<sup>+</sup>: 433.1758; found: 433.1764.

**12B** (anti diastereomer) (81%ee, 51 mg, 12%, clear oil): The enantiomeric excess was determined to be 81% by chiral HPLC analysis (CHIRALPAK IB, 1.0 mL/min, 3.0% *i*-PrOH/hexane,  $\lambda$ =220 nm);  $t_R$ (major) = 28.783 min,  $t_R$ (minor) = 25.203 min.  $[\alpha]_D^{24} = +6.4^\circ$  (c = 1.00, CHCl<sub>3</sub>); <sup>1</sup>H NMR (600 MHz, CDCl<sub>3</sub>):  $\delta$  7.36 – 7.29 (m, 3H), 7.27 – 7.20 (m, 3H), 7.14 – 7.09 (m, 2H), 7.05 – 6.97 (m, 2H), 6.65 (d,  $J$  = 7.9 Hz, 1H), 6.49 (s, 1H), 6.45 (dd,  $J$  = 8.0, 1.7 Hz, 1H), 5.92 (d, 2H), 5.02 (td,  $J$  = 9.4, 3.8 Hz, 1H), 4.91 (d,  $J$  = 14.3 Hz, 1H), 4.75 (d,  $J$  = 14.3 Hz, 1H), 3.12 (dd,  $J$  = 14.8, 3.8 Hz, 1H), 3.02 (dq,  $J$  = 9.8, 7.0 Hz, 1H), 2.82 (dd,  $J$  = 14.7,



9.1 Hz, 1H), 1.16 (d,  $J = 7.0$  Hz, 3H);  $^{13}\text{C}$  NMR (151 MHz,  $\text{CDCl}_3$ )  $\delta$  172.5, 147.7, 146.9, 141.2, 136.9, 129.6, 128.7, 128.4, 128.3, 128.3, 127.4, 121.9, 109.0, 108.4, 101.0, 90.7, 53.0, 39.6, 36.7, 14.6; FTIR ( $\text{cm}^{-1}$ ): 2936, 2337, 1653, 1550, 1446, 1250, 1039, 701. HRMS (ESI) ( $\text{M}+\text{H}$ ) $^+$   $m/z$  calculated for  $[\text{C}_{24}\text{H}_{25}\text{N}_2\text{O}_3]^+$ : 433.1758; found: 433.1762.

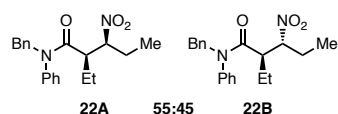

**(22)** According to general protocol C: **8** (69.4 mg, 0.1 mmol), N-benzyl-2-bromo-N-phenylbutanamide (332 mg, 1.0 mmol), 1-nitropropane (107  $\mu\text{L}$ , 1.2 mmol), sodium methoxide (59.4 mg, 1.1 mmol), diethyl zinc (1 M in hexane, 0.02 mmol, 20  $\mu\text{L}$ ) and anhydrous  $\text{Et}_2\text{O}$  (10.0 mL) were combined under  $\text{N}_2$  cooled to 0  $^\circ\text{C}$  with rapid stirring for 24 h. The reaction was worked up according to the general protocol. NMR analysis of the crude reaction mixture revealed a 55:45 mixture of syn and anti isomers. The crude reaction was purified by flash silica gel chromatography (95:05  $\rightarrow$  90:10 hexanes : ethyl acetate) to afford two diastereomerically pure products **22** (305 mg, 90% combined).

**22A** (syn diastereomer) (85%ee, 162 mg, 48%, clear oil): The enantiomeric excess was determined to be 85% by chiral HPLC analysis (CHIRALPAK IC, 1.0 mL/min, 3.0% *i*-PrOH/hexane,  $\lambda=220$  nm);  $t_{\text{R}}$ (major) = 16.928 min,  $t_{\text{R}}$ (minor) = 13.016 min.  $[\alpha]_{\text{D}}^{24} = -16.8^\circ$  ( $c = 1.00$ ,  $\text{CHCl}_3$ );  $^1\text{H}$  NMR (600 MHz,  $\text{CDCl}_3$ ):  $\delta$  7.40 – 7.33 (m, 3H), 7.27 (dd,  $J = 5.0, 2.0$  Hz, 3H), 7.17 (dd,  $J = 6.5, 2.9$  Hz, 2H), 6.95 – 6.89 (m, 2H), 4.90 (q,  $J = 14.0$  Hz, 2H), 4.66 (td,  $J = 10.0, 4.3$  Hz, 1H), 2.83 (td,  $J = 9.5, 3.9$  Hz, 1H), 1.91 – 1.76 (m, 2H), 1.75 – 1.64 (m, 1H), 1.35 (dtd,  $J = 13.7, 7.4, 4.0$  Hz, 1H), 0.91 (t,  $J = 7.3$  Hz, 3H), 0.87 (t,  $J = 7.5$  Hz, 3H);  $^{13}\text{C}$  NMR (151 MHz,  $\text{CDCl}_3$ )  $\delta$  170.7, 141.0, 137.0, 129.7, 129.1, 129.1, 128.5, 128.4, 127.6, 92.8, 53.5, 46.6, 25.7, 23.9, 10.9, 10.5; FTIR ( $\text{cm}^{-1}$ ): 2970, 1653, 1549, 1495, 1276, 1079, 701. HRMS (ESI) ( $\text{M}+\text{H}$ ) $^+$   $m/z$  calculated for  $[\text{C}_{25}\text{H}_{25}\text{N}_2\text{O}_5]^+$ : 341.1859; found: 341.1854.

**22B** (anti diastereomer) (81%ee, 143 mg, 42%, off-white solid): The enantiomeric excess was determined to be 81% by chiral HPLC analysis (CHIRALPAK IF, 1.0 mL/min, 3.0% *i*-PrOH/hexane,  $\lambda=220$  nm);  $t_{\text{R}}$ (major) = 21.365 min,  $t_{\text{R}}$ (minor) = 23.468 min.  $[\alpha]_{\text{D}}^{24} = +51.1^\circ$  ( $c = 1.00$ ,  $\text{CHCl}_3$ );  $^1\text{H}$  NMR (600 MHz,  $\text{CDCl}_3$ ):  $\delta$  7.36 – 7.29 (m, 3H), 7.28 – 7.20 (m, 3H), 7.16 – 7.12 (m, 2H), 7.09 – 7.02 (m, 2H), 4.91 – 4.83 (m, 3H), 3.00 (ddd,  $J = 9.7, 7.4, 4.4$  Hz, 1H), 1.92 (ddq,  $J = 14.9, 7.4, 3.4$  Hz, 1H), 1.70 (ddq,  $J = 14.5, 9.6, 7.2$  Hz, 1H), 1.60 – 1.46 (m, 2H), 0.86 (t,  $J = 7.5$  Hz, 6H);  $^{13}\text{C}$  NMR (151 MHz,  $\text{CDCl}_3$ )  $\delta$  171.4, 141.2, 137.1, 129.4, 128.9, 128.8, 128.3, 128.2, 127.4, 90.0, 53.3, 45.0, 23.8, 22.0, 10.6, 9.7; FTIR ( $\text{cm}^{-1}$ ): 2972, 1652, 1546, 1495, 1270, 1079, 700; mp = 88-90  $^\circ\text{C}$ . HRMS (ESI) ( $\text{M}+\text{H}$ ) $^+$   $m/z$  calculated for  $[\text{C}_{20}\text{H}_{25}\text{N}_2\text{O}_3]^+$ : 341.1859; found: 341.1854.

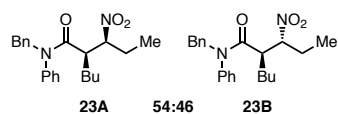

**(23)** According to general protocol C: **8** (69.4 mg, 0.1 mmol), N-benzyl-2-bromo-N-phenylhexanamide (360 mg, 1.0 mmol), 1-nitropropane (107  $\mu\text{L}$ , 1.2 mmol), sodium methoxide (59.4 mg, 1.1 mmol), diethyl zinc (1 M in hexane, 0.02 mmol, 20  $\mu\text{L}$ ) and anhydrous  $\text{Et}_2\text{O}$  (10.0 mL) were combined under  $\text{N}_2$  cooled to 0  $^\circ\text{C}$  with rapid stirring for 24 h. The reaction was worked up according to the general protocol. NMR analysis of the crude reaction mixture revealed a 54:46 mixture of syn and anti isomers. The crude reaction was purified by flash silica gel chromatography (95:05  $\rightarrow$  90:10 hexanes : ethyl acetate) to afford mixture of diastereomers **23A** and **23B** (327 mg, 89% combined, isolated dr 53:47). The enantiomeric excess was determined to be 83% by chiral HPLC analysis for syn diastereomer, **23A** (CHIRALPAK IE, 1.0 mL/min, 3.0% *i*-PrOH/hexane,  $\lambda=254$  nm);  $t_{\text{R}}$ (major) = 13.522 min,  $t_{\text{R}}$ (minor) = 15.697 min; The enantiomeric excess was determined to be 77% by chiral HPLC analysis for anti diastereomer, **23B** (CHIRALPAK IE, 1.0 mL/min, 3.0% *i*-PrOH/hexane,  $\lambda=254$  nm);  $t_{\text{R}}$ (major) = 42.670 min,  $t_{\text{R}}$ (minor) = 55.276 min. Optical rotation for the mixture of diastereomers **23A** and **23B**  $[\alpha]_{\text{D}}^{24} = -5.9^\circ$  ( $c = 1.00$ ,  $\text{CHCl}_3$ ); The reported spectra are for a mixture of two diastereomers  $^1\text{H}$  NMR (400 MHz, Chloroform-*d*)  $\delta$  7.41 – 7.30 (m, 7H), 7.29 – 7.22 (m, 4H), 7.20 – 7.11 (m, 5H), 7.04 (d,  $J = 6.7$  Hz, 2H), 6.94 – 6.89 (m, 2H), 4.94 – 4.88 (m, 3H), 4.87 – 4.79 (m, 2H), 4.63 (ddd,  $J = 9.9, 8.7, 5.6$  Hz, 1H), 3.02 (ddd,  $J = 9.6, 7.8, 4.2$  Hz, 1H), 2.85 (td,  $J = 9.6, 3.2$  Hz, 1H), 1.92 (ddt,  $J = 14.9, 7.5, 3.8$  Hz, 1H), 1.87 – 1.78 (m, 2H), 1.77 – 1.64 (m, 2H), 1.55 – 1.45 (m, 1H), 1.45 – 1.34 (m, 1H), 1.32 – 1.22 (m, 2H), 1.17 (td,  $J = 6.3, 5.1, 2.9$  Hz, 7H), 0.94 – 0.80 (m, 12H);  $^{13}\text{C}$  NMR (101 MHz,  $\text{CDCl}_3$ )  $\delta$  171.7, 170.9, 141.1, 140.9, 137.1, 136.9, 129.7, 129.4, 129.1, 129.1, 128.9, 128.8, 128.6, 128.4, 128.3, 128.2, 127.7, 127.4, 93.1, 90.3, 53.5, 53.3, 45.6, 44.2,

30.7, 28.8, 28.6, 28.2, 25.7, 23.9, 22.9, 22.7, 13.8, 13.8, 10.6, 9.8; FTIR (cm<sup>-1</sup>): 2958, 1653, 1595, 1495, 1198, 1080, 701. HRMS (ESI) (M+H)<sup>+</sup> m/z calculated for [C<sub>22</sub>H<sub>29</sub>N<sub>2</sub>O<sub>3</sub>]<sup>+</sup>: 369.2172; found: 369.2166.

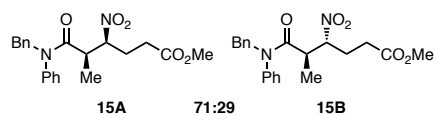

**(15)** According to general protocol E: **8** (34.7 mg, 0.05 mmol), N-benzyl-2-bromo-N-phenylpropionamide (318 mg, 1.0 mmol), methyl 4-nitrobutyrate (152 μL, 1.2 mmol), sodium methoxide (59.4 mg, 1.1 mmol), diethyl zinc (1 M in hexane, 0.01 mmol, 10 μL) and anhydrous Et<sub>2</sub>O (10.0 mL) were combined under N<sub>2</sub> and stirred rapidly at rt for 24 h. The reaction was worked up according to the general protocol. NMR analysis of the crude reaction mixture revealed a 71:29 mixture of syn and anti isomers. The crude reaction was purified by flash silica gel chromatography (90:10 → 80:20 hexanes : ethyl acetate) to afford two diastereomerically pure products **15** (298 mg, 78% combined).

**15A** (syn diastereomer) (87%ee, 208 mg, 54%, clear oil): The enantiomeric excess was determined to be 87% by chiral HPLC analysis (CHIRALPAK IA, 1.0 mL/min, 1.5% *i*-PrOH/hexane, λ=220 nm); t<sub>R</sub>(major) = 46.611 min, t<sub>R</sub>(minor) = 34.712 min. [α]<sub>D</sub><sup>24</sup> = -27.9° (c = 1.00, CHCl<sub>3</sub>); <sup>1</sup>H NMR (600 MHz, CDCl<sub>3</sub>): δ 7.40 – 7.35 (m, 3H), 7.30 – 7.26 (m, 3H), 7.19 – 7.14 (m, 2H), 6.96 – 6.92 (m, 2H), 4.90 (d, *J* = 14.1 Hz, 1H), 4.83 (d, *J* = 14.1 Hz, 1H), 4.79 (td, *J* = 10.5, 2.9 Hz, 1H), 3.70 (s, 3H), 2.85 (dq, *J* = 10.1, 6.7 Hz, 1H), 2.37 (ddd, *J* = 16.1, 9.7, 6.3 Hz, 1H), 2.28 (ddd, *J* = 16.5, 9.7, 5.1 Hz, 1H), 2.20 (dddd, *J* = 16.2, 9.5, 6.3, 2.9 Hz, 1H), 2.14 – 2.05 (m, 1H), 1.09 (d, *J* = 6.6 Hz, 3H); <sup>13</sup>C NMR (101 MHz, CDCl<sub>3</sub>) δ 171.9, 171.4, 140.9, 136.8, 130.0, 128.9, 128.7, 128.5, 128.3, 127.7, 90.8, 53.2, 51.9, 40.9, 30.4, 27.3, 15.6; FTIR (cm<sup>-1</sup>): 2950, 1734, 1653, 1550, 1495, 1257, 989, 702. HRMS (ESI) (M+H)<sup>+</sup> m/z calculated for [C<sub>21</sub>H<sub>25</sub>N<sub>2</sub>O<sub>5</sub>]<sup>+</sup>: 385.4320; found: 385.1752.

**15B** (anti diastereomer) (63%ee, 90 mg, 24%, off-white solid): The enantiomeric excess was determined to be 63% by chiral HPLC analysis (CHIRALPAK IB, 1.0 mL/min, 5.0% *i*-PrOH/hexane, λ=254 nm); t<sub>R</sub>(major) = 14.988 min, t<sub>R</sub>(minor) = 16.460 min. [α]<sub>D</sub><sup>24</sup> = +45.7° (c = 1.00, CHCl<sub>3</sub>); <sup>1</sup>H NMR (600 MHz, CDCl<sub>3</sub>): δ 7.40 – 7.31 (m, 3H), 7.26 – 7.19 (m, 3H), 7.15 – 7.04 (m, 4H), 4.95 – 4.86 (m, 2H), 4.77 (d, *J* = 14.3 Hz, 1H), 3.65 (s, 3H), 2.98 (dq, *J* = 10.0, 7.0 Hz, 1H), 2.43 – 2.15 (m, 3H), 1.89 (dddd, *J* = 15.1, 10.1, 7.9, 5.2 Hz, 1H), 1.11 (d, *J* = 7.0 Hz, 3H); <sup>13</sup>C NMR (101 MHz, CDCl<sub>3</sub>) δ 172.5, 172.2, 141.2, 136.9, 129.7, 128.7, 128.4, 127.4, 88.5, 53.1, 51.9, 39.9, 29.6, 25.9, 14.5; FTIR (cm<sup>-1</sup>): 2951, 1738, 1654, 1549, 1495, 1257, 1079, 702; mp = 97-99 °C. HRMS (ESI) (M+H)<sup>+</sup> m/z calculated for [C<sub>21</sub>H<sub>25</sub>N<sub>2</sub>O<sub>5</sub>]<sup>+</sup>: 385.1758; found: 385.1755.

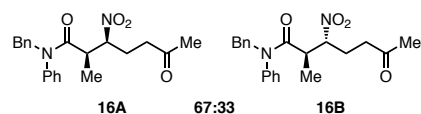

**(16)** According to general protocol D: **8** (69.4 mg, 0.1 mmol), N-benzyl-2-bromo-N-phenylpropionamide (318 mg, 1.0 mmol), 5-nitro-2-pentanone (157 mg, 1.2 mmol), sodium methoxide (59.4 mg, 1.1 mmol), diethyl zinc (1 M in hexane, 0.02 mmol, 20 μL) and anhydrous Et<sub>2</sub>O (10.0 mL) were combined under N<sub>2</sub> cooled to 0 °C with rapid stirring for 24 h. The reaction was worked up according to the general protocol. NMR analysis of the crude reaction mixture revealed a 67:33 mixture of syn and anti isomers. The crude reaction was purified by flash silica gel chromatography (90:10 → 80:20 hexanes : ethyl acetate) to afford two diastereomerically pure products **16** (261 mg, 71% combined).

**16A** (syn diastereomer) (85%ee, 174 mg, 47%, clear oil): The enantiomeric excess was determined to be 87% by chiral HPLC analysis (CHIRALPAK IA, 1.0 mL/min, 3.0% *i*-PrOH/hexane, λ=254 nm); t<sub>R</sub>(major) = 29.473 min, t<sub>R</sub>(minor) = 26.210 min. [α]<sub>D</sub><sup>24</sup> = -31.4° (c = 1.00, CHCl<sub>3</sub>); <sup>1</sup>H NMR (600 MHz, CDCl<sub>3</sub>): δ 7.41 – 7.35 (m, 3H), 7.31 – 7.24 (m, 3H), 7.16 (dd, *J* = 7.4, 2.1 Hz, 2H), 6.99 – 6.94 (m, 2H), 4.90 (d, *J* = 14.1 Hz, 1H), 4.83 (d, *J* = 14.1 Hz, 1H), 4.73 (td, *J* = 10.6, 2.9 Hz, 1H), 2.85 (dq, *J* = 10.1, 6.6 Hz, 1H), 2.51 (ddd, *J* = 18.1, 9.9, 5.5 Hz, 1H), 2.37 (ddd, *J* = 18.1, 10.2, 4.9 Hz, 1H), 2.17 (ddt, *J* = 14.7, 4.7, 2.2 Hz, 1H), 2.14 (s, 3H), 2.05 – 1.95 (m, 1H), 1.08 (d, *J* = 6.6 Hz, 3H); <sup>13</sup>C NMR (151 MHz, CDCl<sub>3</sub>) δ 205.7, 171.5, 141.0, 136.8, 130.0, 128.9, 128.7, 128.5, 128.4, 127.7, 91.0, 53.3, 41.0, 39.7, 29.9, 26.1, 15.6; FTIR (cm<sup>-1</sup>): 2938, 1718, 1653, 1594, 1495, 1256, 1079, 702. HRMS (ESI) (M+H)<sup>+</sup> m/z calculated for [C<sub>21</sub>H<sub>25</sub>N<sub>2</sub>O<sub>4</sub>]<sup>+</sup>: 369.1808; found: 369.1807.

**16B** (anti diastereomer) (84%ee, 87 mg, 24%, clear oil): The enantiomeric excess was determined to be 84% by chiral HPLC analysis (CHIRALPAK IA, 1.0 mL/min, 3.0% *i*-PrOH/hexane,  $\lambda=254$  nm);  $t_R(\text{major}) = 49.050$  min,  $t_R(\text{minor}) = 43.622$  min.  $[\alpha]_D^{24} = +66.2^\circ$  ( $c = 1.00$ ,  $\text{CHCl}_3$ );  $^1\text{H NMR}$  (600 MHz,  $\text{CDCl}_3$ ):  $\delta$  7.38 – 7.32 (m, 3H), 7.28 – 7.21 (m, 3H), 7.13 – 7.09 (m, 2H), 7.09 – 7.05 (m, 2H), 4.88 (d,  $J = 14.3$  Hz, 1H), 4.84 (td,  $J = 10.3, 3.1$  Hz, 1H), 4.78 (d,  $J = 14.3$  Hz, 1H), 2.96 (dq,  $J = 10.1, 7.0$  Hz, 1H), 2.53 (dt,  $J = 18.5, 7.6$  Hz, 1H), 2.42 (ddd,  $J = 18.4, 8.1, 5.1$  Hz, 1H), 2.26 – 2.15 (m, 1H), 2.12 (s, 3H), 1.76 (dddd,  $J = 15.4, 10.5, 7.9, 5.2$  Hz, 1H), 1.11 (d,  $J = 7.0$  Hz, 3H);  $^{13}\text{C NMR}$  (151 MHz,  $\text{CDCl}_3$ )  $\delta$  206.1, 172.6, 140.9, 136.9, 129.6, 128.7, 128.6, 128.4, 127.4, 88.8, 53.1, 40.2, 38.8, 30.1, 24.7, 14.6; FTIR ( $\text{cm}^{-1}$ ): 2938, 1717, 1653, 1548, 1495, 1256, 1079, 701. HRMS (ESI) ( $\text{M}+\text{H}$ ) $^+$   $m/z$  calculated for  $[\text{C}_{21}\text{H}_{25}\text{N}_2\text{O}_4]^+$ : 369.1808; found: 369.1807.

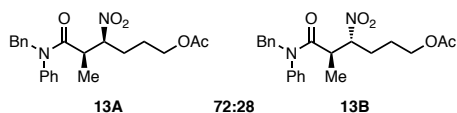

**(13)** According to general protocol D: **8** (69.4 mg, 0.1 mmol), N-benzyl-2-bromo-N-phenylpropionamide (318 mg, 1.0 mmol), 4-nitrobutyl acetate (172  $\mu\text{L}$ , 1.2 mmol), sodium methoxide (59.4 mg, 1.1 mmol), diethyl zinc (1 M in hexane, 0.02 mmol, 20  $\mu\text{L}$ ) and anhydrous  $\text{Et}_2\text{O}$  (10.0 mL) were combined under  $\text{N}_2$  cooled to  $0^\circ\text{C}$  with rapid stirring for 24 h. The reaction was worked up according to the general protocol. NMR analysis of the crude reaction mixture revealed a 72:28 mixture of syn and anti isomers. The crude reaction was purified by flash silica gel chromatography (90:10:1  $\rightarrow$  80:20:1 hexanes : ethyl acetate : acetic acid) to afford two diastereomerically pure products **13** (281 mg, 71% combined).

**13A** (syn diastereomer) (91%ee, 203 mg, 51%, clear oil): The enantiomeric excess was determined to be 91% by chiral HPLC analysis (CHIRALPAK IB, 1.0 mL/min, 1.0% *i*-PrOH/hexane,  $\lambda=220$  nm);  $t_R(\text{major}) = 33.625$  min,  $t_R(\text{minor}) = 30.039$  min.  $[\alpha]_D^{24} = -14.0^\circ$  ( $c = 1.00$ ,  $\text{CHCl}_3$ );  $^1\text{H NMR}$  (600 MHz,  $\text{CDCl}_3$ ):  $\delta$  7.40 – 7.34 (m, 3H), 7.29 – 7.23 (m, 3H), 7.18 – 7.13 (m, 2H), 6.95 – 6.89 (m, 2H), 4.90 (d,  $J = 14.1$  Hz, 1H), 4.84 – 4.73 (m, 2H), 4.10 – 3.99 (m, 2H), 2.82 (dq,  $J = 10.1, 6.7$  Hz, 1H), 2.06 (s, 3H), 1.89 – 1.79 (m, 2H), 1.66 (ddq,  $J = 13.0, 9.3, 6.5$  Hz, 1H), 1.55 (ddq,  $J = 12.8, 9.1, 6.0$  Hz, 1H), 1.08 (d,  $J = 6.6$  Hz, 3H);  $^{13}\text{C NMR}$  (101 MHz,  $\text{CDCl}_3$ )  $\delta$  171.5, 170.9, 140.9, 136.8, 130.0, 128.8, 128.7, 128.4, 128.2, 127.6, 91.3, 63.0, 53.2, 41.0, 29.0, 25.1, 20.9, 15.6; FTIR ( $\text{cm}^{-1}$ ): 2938, 1739, 1654, 1550, 1494, 1240, 1079, 702. HRMS (ESI) ( $\text{M}+\text{H}$ ) $^+$   $m/z$  calculated for  $[\text{C}_{22}\text{H}_{27}\text{N}_2\text{O}_5]^+$ : 399.1914; found: 399.1921.

**13B** (anti diastereomer) (76%ee, 78 mg, 20%, clear oil): The enantiomeric excess was determined to be 77% by chiral HPLC analysis (CHIRALPAK IA, 1.0 mL/min, 5.0% *i*-PrOH/hexane,  $\lambda=210$  nm);  $t_R(\text{major}) = 24.744$  min,  $t_R(\text{minor}) = 16.721$  min.  $[\alpha]_D^{24} = +35.6^\circ$  ( $c = 1.00$ ,  $\text{CHCl}_3$ );  $^1\text{H NMR}$  (600 MHz,  $\text{CDCl}_3$ ):  $\delta$  7.38 – 7.32 (m, 3H), 7.28 – 7.21 (m, 3H), 7.14 – 7.10 (m, 2H), 7.09 – 7.04 (m, 2H), 4.95 – 4.86 (m, 2H), 4.78 (d,  $J = 14.3$  Hz, 1H), 4.07 – 3.97 (m, 2H), 3.00 (dq,  $J = 10.1, 7.0$  Hz, 1H), 2.01 (s, 3H), 1.98 – 1.88 (m, 1H), 1.78 – 1.67 (m, 1H), 1.65 – 1.53 (m, 2H), 1.08 (d,  $J = 7.0$  Hz, 3H);  $^{13}\text{C NMR}$  (101 MHz,  $\text{CDCl}_3$ )  $\delta$  172.6, 170.9, 141.1, 136.9, 129.6, 128.6, 128.4, 128.4, 127.4, 88.9, 63.1, 53.1, 39.7, 27.3, 24.4, 20.8, 14.5; FTIR ( $\text{cm}^{-1}$ ): 2938, 1738, 1655, 1549, 1495, 1243, 1074, 702. HRMS (ESI) ( $\text{M}+\text{H}$ ) $^+$   $m/z$  calculated for  $[\text{C}_{22}\text{H}_{27}\text{N}_2\text{O}_5]^+$ : 399.1914; found: 399.1923.

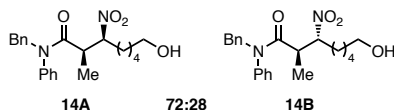

**(14)** According to general protocol D: **8** (69.4 mg, 0.1 mmol), N-benzyl-2-bromo-N-phenylpropionamide (318 mg, 1.0 mmol), 6-nitrohexanol, **S29** (164  $\mu\text{L}$ , 1.2 mmol), sodium methoxide (59.4 mg, 1.1 mmol), diethyl zinc (1 M in hexane, 0.02 mmol, 20  $\mu\text{L}$ ) and anhydrous  $\text{Et}_2\text{O}$  (10.0 mL) were combined under  $\text{N}_2$  cooled to  $0^\circ\text{C}$  with rapid stirring for 24 h. The reaction was worked up according to the general protocol. NMR analysis of the crude reaction mixture revealed a 72:28 mixture of syn and anti isomers. The crude reaction was purified by flash silica gel chromatography (85:15:1  $\rightarrow$  60:40:1 hexanes : ethyl acetate : acetic acid) to afford two diastereomerically pure products **14** (260 mg, 68% combined).

**14A** (syn diastereomer) (88%ee, 181 mg, 47%, clear oil): The enantiomeric excess was determined to be 88% by chiral HPLC analysis (CHIRALPAK IA, 1.0 mL/min, 5.0% *i*-PrOH/hexane,  $\lambda=210$  nm);  $t_R(\text{minor}) = 24.526$  min,  $t_R(\text{major}) = 43.331$  min.  $[\alpha]_D^{24} = -28.0^\circ$  ( $c = 1.00$ ,  $\text{CHCl}_3$ );  $^1\text{H NMR}$  (600 MHz,  $\text{CDCl}_3$ ):  $\delta$  7.40 – 7.36 (m, 3H), 7.30 – 7.26 (m, 3H), 7.19 – 7.14 (m, 2H), 6.95 – 6.90 (m, 2H), 4.91 (d,  $J = 14.1$  Hz, 1H), 4.81 (d,  $J = 14.1$  Hz, 1H), 4.77 (dt,  $J = 9.9, 5.0$  Hz, 1H), 3.64 (q,  $J = 6.2$  Hz, 2H), 2.81 (dq,  $J = 10.3, 6.7$  Hz, 1H),

1.84 – 1.73 (m, 2H), 1.57 – 1.50 (m, 2H), 1.46 – 1.32 (m, 3H), 1.29 – 1.22 (m, 2H), 1.08 (d,  $J = 6.7$  Hz, 3H);  $^{13}\text{C}$  NMR (101 MHz,  $\text{CDCl}_3$ )  $\delta$  171.8, 141.0, 136.9, 130.0, 128.9, 128.7, 128.5, 128.3, 127.7, 91.7, 62.6, 53.2, 41.1, 32.2, 25.6, 24.8, 15.6; FTIR ( $\text{cm}^{-1}$ ): 3421, 2935, 2862, 1653, 1549, 1495, 1200, 1077, 701. HRMS (ESI) ( $\text{M}+\text{H}$ ) $^+$   $m/z$  calculated for  $[\text{C}_{22}\text{H}_{29}\text{N}_2\text{O}_4]^+$ : 385.2121; found: 385.2129.

**14B** (anti diastereomer) (77%ee, 79 mg, 21%, clear oil): The enantiomeric excess was determined to be 77% by chiral HPLC analysis (CHIRALPAK IB, 1.0 mL/min, 5.0% *i*-PrOH/hexane,  $\lambda=210$  nm);  $t_{\text{R}}$ (major) = 10.167 min,  $t_{\text{R}}$ (minor) = 12.878 min.  $[\alpha]_{\text{D}}^{24} = +35.5^\circ$  ( $c = 1.00$ ,  $\text{CHCl}_3$ );  $^1\text{H}$  NMR (600 MHz,  $\text{CDCl}_3$ ):  $\delta$  7.30 – 7.23 (m, 2H), 7.21 – 7.12 (m, 4H), 7.06 – 7.01 (m, 2H), 6.98 (d,  $J = 6.9$  Hz, 2H), 4.83 – 4.78 (m, 2H), 4.70 (d,  $J = 14.3$  Hz, 1H), 3.51 (t,  $J = 6.5$  Hz, 2H), 2.91 (dq,  $J = 10.0, 7.0$  Hz, 1H), 1.75 (dtt,  $J = 14.3, 5.5, 3.3$  Hz, 1H), 1.57 (dtd,  $J = 14.5, 9.5, 5.0$  Hz, 1H), 1.47 – 1.39 (m, 2H), 1.35 – 1.13 (m, 4H), 0.98 (d,  $J = 7.0$  Hz, 3H);  $^{13}\text{C}$  NMR (101 MHz,  $\text{CDCl}_3$ )  $\delta$  172.8, 141.4, 137.1, 129.6, 128.7, 128.6, 128.4, 128.4, 127.4, 89.4, 62.5, 53.2, 39.9, 32.2, 30.7, 25.1, 24.9, 14.6; FTIR ( $\text{cm}^{-1}$ ): 3431, 2933, 2862, 1653, 1548, 1495, 1279, 1074, 701. HRMS (ESI) ( $\text{M}+\text{H}$ ) $^+$   $m/z$  calculated for  $[\text{C}_{22}\text{H}_{29}\text{N}_2\text{O}_4]^+$ : 385.2121; found: 385.2127.

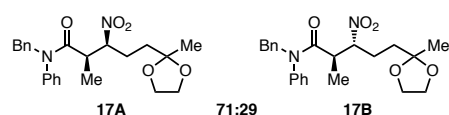

**(17)** According to general protocol D: **8** (34.7 mg, 0.05 mmol), N-benzyl-2-bromo-N-phenylpropionamide (318 mg, 1.0 mmol), 2-methyl-2-(3-nitropropyl)-1,3-dioxolane (210 mg, 1.2 mmol), sodium methoxide (59.4 mg, 1.1 mmol), diethyl zinc (1 M in hexane, 0.01 mmol, 10  $\mu\text{L}$ ) and anhydrous  $\text{Et}_2\text{O}$  (10.0 mL) were combined under  $\text{N}_2$  cooled to  $0^\circ\text{C}$  with rapid stirring for 24 h. The reaction was worked up according to the general protocol. NMR analysis of the crude reaction mixture revealed a 71:29 mixture of syn and anti isomers. The crude reaction was purified by flash silica gel chromatography (90:10:1  $\rightarrow$  80:20:1 hexanes : ethyl acetate : acetic acid) to afford two diastereomerically pure products **17** (353 mg, 86% combined).

**17A** (syn diastereomer) (89%ee, 249 mg, 61%, clear oil): The enantiomeric excess was determined to be 89% by chiral HPLC analysis (CHIRALPAK IA, 1.0 mL/min, 3.0% *i*-PrOH/hexane,  $\lambda=220$  nm);  $t_{\text{R}}$ (major) = 24.103 min,  $t_{\text{R}}$ (minor) = 16.561 min.  $[\alpha]_{\text{D}}^{24} = -37.3^\circ$  ( $c = 1.00$ ,  $\text{CHCl}_3$ );  $^1\text{H}$  NMR (600 MHz,  $\text{CDCl}_3$ ):  $\delta$  7.40 – 7.34 (m, 3H), 7.30 – 7.25 (m, 3H), 7.20 – 7.14 (m, 2H), 6.95 – 6.90 (m, 2H), 5.02 (d,  $J = 14.2$  Hz, 1H), 4.83 (td,  $J = 10.5, 3.0$  Hz, 1H), 4.70 (d,  $J = 14.2$  Hz, 1H), 4.00 – 3.84 (m, 4H), 2.81 (dq,  $J = 10.3, 6.6$  Hz, 1H), 1.94 (dddd,  $J = 13.7, 10.6, 5.9, 3.0$  Hz, 1H), 1.84 (dtd,  $J = 14.6, 10.3, 4.8$  Hz, 1H), 1.67 (ddd,  $J = 14.0, 10.0, 5.9$  Hz, 1H), 1.56 – 1.51 (m, 1H), 1.28 (s, 3H), 1.08 (d,  $J = 6.6$  Hz, 3H);  $^{13}\text{C}$  NMR (101 MHz,  $\text{CDCl}_3$ )  $\delta$  171.7, 141.1, 137.0, 130.0, 128.9, 128.7, 128.5, 128.3, 127.6, 108.9, 91.6, 64.7, 53.2, 41.1, 34.9, 27.0, 24.0, 15.6; FTIR ( $\text{cm}^{-1}$ ): 2982, 1654, 1550, 1495, 1257, 1075, 857, 702. HRMS (ESI) ( $\text{M}+\text{H}$ ) $^+$   $m/z$  calculated for  $[\text{C}_{23}\text{H}_{29}\text{N}_2\text{O}_5]^+$ : 413.1998; found: 413.2070.

**17A** (syn diastereomer) (89%ee, 249 mg, 61%, clear oil): The enantiomeric excess was determined to be 89% by chiral HPLC analysis (CHIRALPAK IA, 1.0 mL/min, 3.0% *i*-PrOH/hexane,  $\lambda=220$  nm);  $t_{\text{R}}$ (major) = 24.103 min,  $t_{\text{R}}$ (minor) = 16.561 min.  $[\alpha]_{\text{D}}^{24} = -37.3^\circ$  ( $c = 1.00$ ,  $\text{CHCl}_3$ );  $^1\text{H}$  NMR (600 MHz,  $\text{CDCl}_3$ ):  $\delta$  7.40 – 7.34 (m, 3H), 7.30 – 7.25 (m, 3H), 7.20 – 7.14 (m, 2H), 6.95 – 6.90 (m, 2H), 5.02 (d,  $J = 14.2$  Hz, 1H), 4.83 (td,  $J = 10.5, 3.0$  Hz, 1H), 4.70 (d,  $J = 14.2$  Hz, 1H), 4.00 – 3.84 (m, 4H), 2.81 (dq,  $J = 10.3, 6.6$  Hz, 1H), 1.94 (dddd,  $J = 13.7, 10.6, 5.9, 3.0$  Hz, 1H), 1.84 (dtd,  $J = 14.6, 10.3, 4.8$  Hz, 1H), 1.67 (ddd,  $J = 14.0, 10.0, 5.9$  Hz, 1H), 1.56 – 1.51 (m, 1H), 1.28 (s, 3H), 1.08 (d,  $J = 6.6$  Hz, 3H);  $^{13}\text{C}$  NMR (101 MHz,  $\text{CDCl}_3$ )  $\delta$  171.7, 141.1, 137.0, 130.0, 128.9, 128.7, 128.5, 128.3, 127.6, 108.9, 91.6, 64.7, 53.2, 41.1, 34.9, 27.0, 24.0, 15.6; FTIR ( $\text{cm}^{-1}$ ): 2982, 1654, 1550, 1495, 1257, 1075, 857, 702. HRMS (ESI) ( $\text{M}+\text{H}$ ) $^+$   $m/z$  calculated for  $[\text{C}_{23}\text{H}_{29}\text{N}_2\text{O}_5]^+$ : 413.1998; found: 413.2070.

**17B** (anti diastereomer) (75%ee, 104 mg, 25%, off white solid): The enantiomeric excess was determined to be 75% by chiral HPLC analysis (CHIRALPAK IA, 1.0 mL/min, 3.0% *i*-PrOH/hexane,  $\lambda=220$  nm);  $t_{\text{R}}$ (major) = 36.984 min,  $t_{\text{R}}$ (minor) = 22.725 min.  $[\alpha]_{\text{D}}^{24} = +38.1^\circ$  ( $c = 1.00$ ,  $\text{CHCl}_3$ );  $^1\text{H}$  NMR (600 MHz,  $\text{CDCl}_3$ ):  $\delta$  7.39 – 7.31 (m, 3H), 7.28 – 7.20 (m, 3H), 7.12 (d, 2H), 7.07 (d,  $J = 7.3$  Hz, 2H), 4.94 – 4.86 (m, 2H), 4.78 (d,  $J = 14.3$  Hz, 1H), 3.93 – 3.87 (m, 2H), 3.87 – 3.80 (m, 2H), 2.99 (dq,  $J = 10.0, 7.0$  Hz, 1H), 1.99 (dtd,  $J = 14.9, 11.4, 4.0$  Hz, 1H), 1.78 – 1.67 (m, 1H), 1.63 (td,  $J = 13.6, 11.1, 4.7$  Hz, 1H), 1.59 – 1.50 (m, 1H), 1.24 (s, 3H), 1.08 (d,  $J = 7.0$  Hz, 3H);  $^{13}\text{C}$  NMR (101 MHz,  $\text{CDCl}_3$ )  $\delta$  172.7, 141.2, 136.9, 129.6, 128.6, 128.5, 128.4, 128.3, 127.4, 108.9, 89.3, 64.6, 53.1, 39.7, 34.2, 25.1, 23.82, 14.5; FTIR ( $\text{cm}^{-1}$ ): 2982, 1655, 1548, 1495, 1257, 858, 701; mp = 107-109  $^\circ\text{C}$ . HRMS (ESI) ( $\text{M}+\text{H}$ ) $^+$   $m/z$  calculated for  $[\text{C}_{22}\text{H}_{29}\text{N}_2\text{O}_5]^+$ : 413.1998; found: 413.2071.

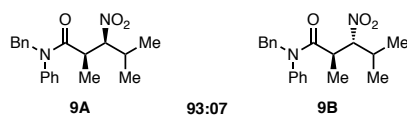

**(9)** According to general protocol C: **8** (69.4 mg, 0.1 mmol), N-benzyl-2-bromo-N-phenylpropionamide (318 mg, 1.0 mmol), 2-methyl-1-nitropropane (130  $\mu\text{L}$ , 1.2 mmol), sodium methoxide (59.4 mg, 1.1 mmol), diethyl zinc (1 M in hexane, 0.02 mmol, 20  $\mu\text{L}$ ) and anhydrous  $\text{Et}_2\text{O}$  (10.0 mL) were combined under  $\text{N}_2$  cooled to  $0^\circ\text{C}$  with rapid stirring for 24 h. The reaction was worked up according to the general protocol. NMR analysis of the crude reaction mixture revealed an 93:07 mixture of syn and anti isomers. The crude reaction was purified by flash silica gel chromatography (95:05  $\rightarrow$  90:10 hexanes : ethyl acetate) to afford two diastereomerically pure products **9** (295 mg, 87% combined).

**9A** (syn diastereomer) (87%ee, 295 mg, 87%, clear oil): The enantiomeric excess was determined to be 87% by chiral HPLC analysis (CHIRALPAK IA, 1.0 mL/min, 3.0% *i*-PrOH/hexane,  $\lambda=220$  nm);  $t_{\text{R}}$ (major) = 24.103 min,  $t_{\text{R}}$ (minor) = 16.561 min.  $[\alpha]_{\text{D}}^{24} = -37.3^\circ$  ( $c = 1.00$ ,  $\text{CHCl}_3$ );  $^1\text{H}$  NMR (600 MHz,  $\text{CDCl}_3$ ):  $\delta$  7.40 – 7.34 (m, 3H), 7.30 – 7.25 (m, 3H), 7.20 – 7.14 (m, 2H), 6.95 – 6.90 (m, 2H), 5.02 (d,  $J = 14.2$  Hz, 1H), 4.83 (td,  $J = 10.5, 3.0$  Hz, 1H), 4.70 (d,  $J = 14.2$  Hz, 1H), 4.00 – 3.84 (m, 4H), 2.81 (dq,  $J = 10.3, 6.6$  Hz, 1H), 1.94 (dddd,  $J = 13.7, 10.6, 5.9, 3.0$  Hz, 1H), 1.84 (dtd,  $J = 14.6, 10.3, 4.8$  Hz, 1H), 1.67 (ddd,  $J = 14.0, 10.0, 5.9$  Hz, 1H), 1.56 – 1.51 (m, 1H), 1.28 (s, 3H), 1.08 (d,  $J = 6.6$  Hz, 3H);  $^{13}\text{C}$  NMR (101 MHz,  $\text{CDCl}_3$ )  $\delta$  171.7, 141.1, 137.0, 130.0, 128.9, 128.7, 128.5, 128.3, 127.6, 108.9, 91.6, 64.7, 53.2, 41.1, 34.9, 27.0, 24.0, 15.6; FTIR ( $\text{cm}^{-1}$ ): 2982, 1654, 1550, 1495, 1257, 1075, 857, 702. HRMS (ESI) ( $\text{M}+\text{H}$ ) $^+$   $m/z$  calculated for  $[\text{C}_{23}\text{H}_{29}\text{N}_2\text{O}_5]^+$ : 413.1998; found: 413.2070.

**9A** (syn diastereomer) (94%ee, 270 mg, 80%, clear oil): The enantiomeric excess was determined to be 94% by chiral HPLC analysis (CHIRALPAK IA, 1.0 mL/min, 1.0% *i*-PrOH/hexane,  $\lambda=220$  nm);  $t_R(\text{major}) = 17.559$  min,  $t_R(\text{minor}) = 22.117$  min.  $[\alpha]_D^{24} = -74.1^\circ$  ( $c = 1.00$ ,  $\text{CHCl}_3$ );  $^1\text{H NMR}$  (600 MHz,  $\text{CDCl}_3$ ):  $\delta$  7.40 – 7.35 (m, 3H), 7.29 – 7.26 (m, 3H), 7.17 – 7.12 (m, 2H), 6.99 – 6.94 (m, 2H), 4.90 (d,  $J = 14.1$  Hz, 1H), 4.82 (d,  $J = 14.1$  Hz, 1H), 4.77 (dd,  $J = 10.2, 4.7$  Hz, 1H), 2.92 (dq,  $J = 10.2, 6.6$  Hz, 1H), 2.15 (pd,  $J = 6.9, 4.7$  Hz, 1H), 1.13 (d,  $J = 6.6$  Hz, 3H), 1.00 (d,  $J = 6.9$  Hz, 3H), 0.84 (d,  $J = 6.8$  Hz, 3H);  $^{13}\text{C NMR}$  (101 MHz,  $\text{CDCl}_3$ )  $\delta$  171.9, 141.0, 136.9, 129.9, 128.9, 128.7, 128.4, 128.2, 127.6, 96.2, 53.2, 38.4, 30.1, 20.1, 17.0, 16.0; FTIR ( $\text{cm}^{-1}$ ): 2972, 1654, 1545, 1495, 1200, 1079, 701. HRMS (ESI) (M+H)<sup>+</sup>  $m/z$  calculated for  $[\text{C}_{20}\text{H}_{25}\text{N}_2\text{O}_3]^+$ : 341.1859; found: 341.1849.

**9B** (anti diastereomer) (76%ee, 25 mg, 7%, clear oil): The enantiomeric excess was determined to be 76% by chiral HPLC analysis (CHIRALPAK IA, 1.0 mL/min, 5.0% *i*-PrOH/hexane,  $\lambda=220$  nm);  $t_R(\text{major}) = 16.688$  min,  $t_R(\text{minor}) = 8.950$  min.  $[\alpha]_D^{24} = +27.2^\circ$  ( $c = 1.00$ ,  $\text{CHCl}_3$ );  $^1\text{H NMR}$  (600 MHz,  $\text{CDCl}_3$ ):  $\delta$  7.39 – 7.31 (m, 3H), 7.25 – 7.20 (m, 3H), 7.16 – 7.08 (m, 4H), 4.91 (d,  $J = 14.3$  Hz, 1H), 4.85 (dd,  $J = 10.7, 2.8$  Hz, 1H), 4.77 (d,  $J = 14.3$  Hz, 1H), 3.12 (dq,  $J = 10.7, 7.0$  Hz, 1H), 2.03 (ddq,  $J = 13.7, 6.8, 3.5, 2.9$  Hz, 1H), 1.09 (d,  $J = 6.9$  Hz, 3H), 1.05 (d,  $J = 7.0$  Hz, 3H), 0.68 (d,  $J = 6.8$  Hz, 3H);  $^{13}\text{C NMR}$  (101 MHz,  $\text{CDCl}_3$ )  $\delta$  173.1, 141.3, 137.0, 129.5, 128.6, 128.4, 128.3, 127.4, 94.0, 53.0, 37.8, 27.8, 20.6, 15.5, 14.6; FTIR ( $\text{cm}^{-1}$ ): 2970, 1655, 1545, 1495, 1259, 1079, 700. HRMS (ESI) (M+H)<sup>+</sup>  $m/z$  calculated for  $[\text{C}_{20}\text{H}_{25}\text{N}_2\text{O}_3]^+$ : 341.1859; found: 341.1847.

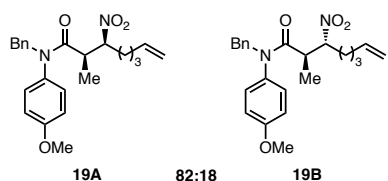

**(19)** According to general protocol C: **8** (69.4 mg, 0.1 mmol), N-benzyl-2-bromo-N-(4-methoxyphenyl)propanamide (**S23**, 348 mg, 1.0 mmol), 1-nitrohexene (164  $\mu\text{L}$ , 1.2 mmol), sodium methoxide (59.4 mg, 1.1 mmol), diethyl zinc (1 M in hexane, 0.02 mmol, 20  $\mu\text{L}$ ) and anhydrous  $\text{Et}_2\text{O}$  (10.0 mL) were combined under  $\text{N}_2$  cooled to  $0^\circ\text{C}$  with rapid stirring for 24 h. The reaction was worked up according to the general protocol.

NMR analysis of the crude reaction mixture revealed a 82:18 mixture of syn and anti isomers. The crude reaction was purified by flash silica gel chromatography (95:05  $\rightarrow$  90:10 hexanes : ethyl acetate) to afford two diastereomerically pure products **19** (312 mg, 79% combined).

**19A** (syn diastereomer) (90%ee, 260 mg, 66%, white solid): The enantiomeric excess was determined to be 90% by chiral HPLC analysis (CHIRALPAK IC, 1.0 mL/min, 2.0% *i*-PrOH/hexane,  $\lambda=220$  nm);  $t_R(\text{major}) = 29.259$  min,  $t_R(\text{minor}) = 22.363$  min.  $[\alpha]_D^{24} = -35.4^\circ$  ( $c = 1.00$ ,  $\text{CHCl}_3$ );  $^1\text{H NMR}$  (600 MHz,  $\text{CDCl}_3$ ):  $\delta$  7.30 – 7.24 (m, 3H), 7.19 – 7.13 (m, 2H), 6.87 – 6.83 (m, 2H), 6.80 (d,  $J = 9.1$  Hz, 2H), 5.73 (ddt,  $J = 17.0, 10.2, 6.7$  Hz, 1H), 5.05 – 4.97 (m, 2H), 4.94 (d,  $J = 14.0$  Hz, 1H), 4.79 – 4.73 (m, 1H), 4.70 (d,  $J = 14.0$  Hz, 1H), 3.82 (s, 3H), 2.84 (dq,  $J = 10.3, 6.6$  Hz, 1H), 2.14 – 1.99 (m, 2H), 1.75 (td,  $J = 8.1, 6.4$  Hz, 2H), 1.47 – 1.38 (m, 1H), 1.32 (dddd,  $J = 15.1, 13.3, 8.1, 6.6$  Hz, 1H), 1.07 (d,  $J = 6.7$  Hz, 3H);  $^{13}\text{C NMR}$  (151 MHz,  $\text{CDCl}_3$ )  $\delta$  172.1, 159.3, 137.4, 137.1, 133.7, 129.3, 128.9, 128.4, 127.6, 115.4, 115.0, 91.8, 55.4, 53.2, 40.9, 32.7, 31.7, 25.0, 15.5; FTIR ( $\text{cm}^{-1}$ ): 2933, 1653, 1549, 1405, 1250, 1037, 701; mp = 66-68  $^\circ\text{C}$ . HRMS (ESI) (M+H)<sup>+</sup>  $m/z$  calculated for  $[\text{C}_{23}\text{H}_{29}\text{N}_2\text{O}_4]^+$ : 397.2121; found: 397.2103.

**19B** (anti diastereomer) (82%ee, 52 mg, 13%, clear oil): The enantiomeric excess was determined to be 82% by chiral HPLC analysis (CHIRALPAK IB, 1.0 mL/min, 0.8% *i*-PrOH/hexane,  $\lambda=254$  nm);  $t_R(\text{major}) = 44.576$  min,  $t_R(\text{minor}) = 40.614$  min.  $[\alpha]_D^{24} = +34.7^\circ$  ( $c = 1.00$ ,  $\text{CHCl}_3$ );  $^1\text{H NMR}$  (600 MHz,  $\text{CDCl}_3$ ):  $\delta$  7.29 – 7.21 (m, 3H), 7.15 – 7.09 (m, 2H), 6.96 (d,  $J = 9.2$  Hz, 2H), 6.87 – 6.81 (m, 2H), 5.68 (ddt,  $J = 17.0, 10.3, 6.7$  Hz, 1H), 4.99 – 4.93 (m, 2H), 4.88 (td,  $J = 9.8, 3.4$  Hz, 1H), 4.85 (d,  $J = 14.3$  Hz, 1H), 4.74 (d,  $J = 14.2$  Hz, 1H), 3.80 (s, 3H), 3.00 (dq,  $J = 10.1, 7.0$  Hz, 1H), 2.11 – 1.96 (m, 2H), 1.89 – 1.79 (m, 1H), 1.65 (dtd,  $J = 14.9, 9.7, 5.3$  Hz, 1H), 1.42 – 1.29 (m, 2H), 1.05 (d,  $J = 7.0$  Hz, 3H);  $^{13}\text{C NMR}$  (151 MHz,  $\text{CDCl}_3$ )  $\delta$  173.2, 159.2, 137.3, 137.1, 133.9, 128.8, 128.4, 127.4, 115.5, 114.6, 89.3, 55.3, 53.2, 39.7, 32.7, 30.0, 24.1, 14.5; FTIR ( $\text{cm}^{-1}$ ): 2932, 1653, 1549, 1409, 1250, 916, 700. HRMS (ESI) (M+H)<sup>+</sup>  $m/z$  calculated for  $[\text{C}_{23}\text{H}_{29}\text{N}_2\text{O}_4]^+$ : 397.2121; found: 397.2103.

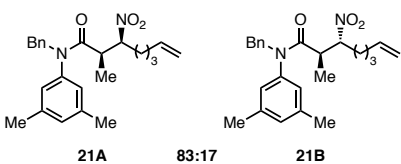

**(21)** According to general protocol C: **8** (69.4 mg, 0.1 mmol), 1-nitrohexene (164  $\mu$ L, 1.2 mmol), N-benzyl-2-bromo-N-(3,5-dimethylphenyl)propanamide (**S25**, 346 mg, 1.0 mmol), sodium methoxide (59.4 mg, 1.1 mmol), diethyl zinc (1 M in hexane, 0.02 mmol, 20  $\mu$ L) and anhydrous Et<sub>2</sub>O (10.0 mL) were combined under N<sub>2</sub> cooled to 0 °C with rapid stirring for 24 h. The reaction was worked up according to the general protocol. NMR analysis of the crude reaction mixture revealed a 83:17 mixture of syn and anti isomers. The crude reaction was purified by flash silica gel chromatography (95:05  $\rightarrow$  90:10 hexanes : ethyl acetate) to afford two diastereomerically pure products **21** (300 mg, 76% combined).

**21A** (syn diastereomer) (91%ee, 250 mg, 63%, clear oil): The enantiomeric excess was determined to be 91% by chiral HPLC analysis (CHIRALPAK IC, 1.0 mL/min, 2.0% *i*-PrOH/hexane,  $\lambda$ =220 nm);  $t_R$ (major) = 21.293 min,  $t_R$ (minor) = 17.692 min.  $[\alpha]_D^{24} = -49.0^\circ$  ( $c = 1.00$ , CHCl<sub>3</sub>); <sup>1</sup>H NMR (600 MHz, CDCl<sub>3</sub>):  $\delta$  7.32 – 7.24 (m, 3H), 7.20 – 7.14 (m, 2H), 6.98 (s, 1H), 6.49 (s, 2H), 5.72 (ddt,  $J = 17.0, 10.2, 6.7$  Hz, 1H), 5.05 – 4.95 (m, 2H), 4.91 (d,  $J = 14.0$  Hz, 1H), 4.82 – 4.73 (m, 1H), 4.71 (d,  $J = 14.1$  Hz, 1H), 2.85 (dq,  $J = 10.3, 6.7$  Hz, 1H), 2.26 (s, 6H), 2.15 – 1.96 (m, 2H), 1.80 – 1.69 (m, 2H), 1.50 – 1.36 (m, 1H), 1.36 – 1.24 (m, 1H), 1.07 (d,  $J = 6.7$  Hz, 3H); <sup>13</sup>C NMR (101 MHz, CDCl<sub>3</sub>)  $\delta$  171.7, 141.0, 139.6, 137.4, 137.1, 130.3, 128.9, 128.3, 127.5, 125.8, 115.4, 91.8, 53.2, 40.9, 32.8, 31.7, 24.9, 21.1, 15.7; FTIR (cm<sup>-1</sup>): 2925, 1653, 1555, 1403, 1217, 915, 711. HRMS (ESI) (M+H)<sup>+</sup>  $m/z$  calculated for [C<sub>24</sub>H<sub>31</sub>N<sub>2</sub>O<sub>3</sub>]<sup>+</sup>: 395.2329; found: 395.2312.

**21B** (anti diastereomer) (83%ee, 50 mg, 13%, off white solid): The enantiomeric excess was determined to be 83% by chiral HPLC analysis (CHIRALPAK IC, 1.0 mL/min, 8.0% *i*-PrOH/hexane,  $\lambda$ =254 nm);  $t_R$ (major) = 39.319 min,  $t_R$ (minor) = 50.571 min.  $[\alpha]_D^{24} = +32.2^\circ$  ( $c = 1.00$ , CHCl<sub>3</sub>); <sup>1</sup>H NMR (600 MHz, CDCl<sub>3</sub>):  $\delta$  7.30 – 7.20 (m, 3H), 7.16 – 7.09 (m, 2H), 6.95 (s, 1H), 6.65 (s, 2H), 5.69 (ddt,  $J = 17.0, 10.2, 6.7$  Hz, 1H), 5.02 – 4.87 (m, 2H), 4.85 (td, 1H), 4.82 (q, 2H), 3.03 (dq,  $J = 10.0, 7.0$  Hz, 1H), 2.26 (s, 6H), 2.13 – 1.94 (m, 2H), 1.90 – 1.76 (m, 1H), 1.72 – 1.59 (m, 1H), 1.44 – 1.28 (m, 2H), 1.06 (d,  $J = 7.0$  Hz, 3H); <sup>13</sup>C NMR (101 MHz, CDCl<sub>3</sub>)  $\delta$  172.8, 141.2, 137.4, 137.2, 129.9, 128.6, 128.3, 127.3, 115.5, 89.3, 53.1, 39.8, 32.8, 29.9, 24.2, 21.1, 14.7; FTIR (cm<sup>-1</sup>): 2924, 1654, 1549, 1406, 1233, 915, 711; mp = 84-86 °C. HRMS (ESI) (M+H)<sup>+</sup>  $m/z$  calculated for [C<sub>24</sub>H<sub>31</sub>N<sub>2</sub>O<sub>3</sub>]<sup>+</sup>: 395.2329; found: 395.2310.

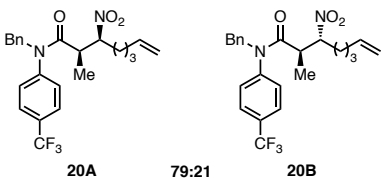

**(20)** According to general protocol C: **8** (69.4 mg, 0.1 mmol), 1-nitrohexene (164  $\mu$ L, 1.2 mmol), N-benzyl-2-bromo-N-(4-(trifluoromethyl)phenyl)propanamide (**S27**, 386 mg, 1.0 mmol), sodium methoxide (59.4 mg, 1.1 mmol), diethyl zinc (1 M in hexane, 0.02 mmol, 20  $\mu$ L) and anhydrous Et<sub>2</sub>O (10.0 mL) were combined under N<sub>2</sub> cooled to 0 °C with rapid stirring for 24 h. The reaction was worked up according to the general protocol. NMR analysis of the crude reaction mixture revealed an 79:21 mixture of syn and anti isomers. The crude reaction was purified by flash silica gel chromatography (95:05  $\rightarrow$  90:10 hexanes : ethyl acetate) to afford two diastereomerically pure products **20** (342 mg, 79% combined).

**20A** (syn diastereomer) (89%ee, 274 mg, 63%, off white solid): The enantiomeric excess was determined to be 89% by chiral HPLC analysis (CHIRALPAK IC, 1.0 mL/min, 2.0% *i*-PrOH/hexane,  $\lambda$ =220 nm);  $t_R$ (major) = 12.618 min,  $t_R$ (minor) = 10.102 min.  $[\alpha]_D^{24} = -29.7^\circ$  ( $c = 1.00$ , CHCl<sub>3</sub>); <sup>1</sup>H NMR (600 MHz, CDCl<sub>3</sub>):  $\delta$  7.65 (d,  $J = 8.2$  Hz, 2H), 7.33 – 7.27 (m, 3H), 7.18 – 7.12 (m, 2H), 7.04 (d,  $J = 8.0$  Hz, 2H), 5.73 (ddt,  $J = 17.0, 10.2, 6.7$  Hz, 1H), 5.06 – 4.94 (m, 3H), 4.80 – 4.72 (m, 2H), 2.74 (dq,  $J = 10.0, 6.7$  Hz, 1H), 2.16 – 2.00 (m, 2H), 1.76 (dt,  $J = 9.8, 6.7$  Hz, 2H), 1.50 – 1.40 (m, 1H), 1.38 – 1.29 (m, 1H), 1.10 (d,  $J = 6.7$  Hz, 3H); <sup>13</sup>C NMR (151 MHz, CDCl<sub>3</sub>)  $\delta$  171.4, 144.3, 137.4, 136.4, 131.0 (q,  $J = 33$  Hz), 129.0, 128.9, 128.7, 128.0, 127.3, 127.2, 123.5 (q,  $J = 273$  Hz), 115.6, 91.5, 53.2, 41.3, 32.8, 31.7, 25.0, 15.6; <sup>19</sup>F NMR (565 MHz, CDCl<sub>3</sub>)  $\delta$  -62.7; FTIR (cm<sup>-1</sup>): 2932, 1661, 1555, 1404, 1325, 852, 701; mp = 89-91 °C. HRMS (ESI) (M+H)<sup>+</sup>  $m/z$  calculated for [C<sub>23</sub>H<sub>26</sub>N<sub>2</sub>O<sub>3</sub>F<sub>3</sub>]<sup>+</sup>: 435.1890; found: 435.1887.

**20B** (anti diastereomer) (80%ee, 68 mg, 16%, clear oil): The enantiomeric excess was determined to be 80% by chiral HPLC analysis (CHIRALPAK IC, 1.0 mL/min, 5.0% *i*-PrOH/hexane,  $\lambda$ =220 nm);  $t_R$ (major) = 24.873 min,  $t_R$ (minor) = 30.304 min.  $[\alpha]_D^{24} = +37.3^\circ$  ( $c = 1.00$ , CHCl<sub>3</sub>); <sup>1</sup>H NMR (600 MHz, CDCl<sub>3</sub>):  $\delta$  7.63 (d,

$J = 8.1$  Hz, 2H), 7.31 – 7.23 (m, 3H), 7.21 (d,  $J = 8.0$  Hz, 2H), 7.13 – 7.06 (m, 2H), 5.68 (ddt,  $J = 17.0, 10.3, 6.7$  Hz, 1H), 5.03 – 4.93 (m, 2H), 4.93 – 4.86 (m, 2H), 4.79 (d,  $J = 14.4$  Hz, 1H), 2.92 (dq,  $J = 10.1, 7.0$  Hz, 1H), 2.12 – 1.95 (m, 2H), 1.90 – 1.80 (m, 1H), 1.64 (dtd,  $J = 14.9, 9.8, 5.2$  Hz, 1H), 1.42 – 1.28 (m, 2H), 1.07 (d,  $J = 7.0$  Hz, 3H);  $^{13}\text{C}$  NMR (151 MHz,  $\text{CDCl}_3$ )  $\delta$  172.5, 144.6, 137.2, 136.5, 130.6 (q,  $J = 33$  Hz), 129.1, 128.7, 128.6, 127.8, 126.8, 126.8, 123.6 (q,  $J = 273$  Hz), 115.6, 89.3, 53.1, 40.0, 32.7, 30.0, 24.2, 14.6;  $^{19}\text{F}$  NMR (565 MHz,  $\text{CDCl}_3$ )  $\delta$  -62.6; FTIR ( $\text{cm}^{-1}$ ): 2932, 1661, 1550, 1408, 1325, 853, 700. HRMS (ESI) (M+H) $^+$   $m/z$  calculated for  $[\text{C}_{23}\text{H}_{26}\text{N}_2\text{O}_3\text{F}_3]^+$ : 435.1890; found: 435.1887.

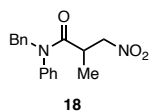

**(18)** According to general protocol C: **8** (69.4 mg, 0.1 mmol), N-benzyl-2-bromo-N-phenylpropanamide (318 mg, 1.0 mmol), nitromethane (322  $\mu\text{L}$ , 1.2 mmol), sodium methoxide (59.4 mg, 1.1 mmol), diethyl zinc (1 M in hexane, 0.02 mmol, 20  $\mu\text{L}$ ) and anhydrous  $\text{Et}_2\text{O}$  (10.0 mL) were combined under  $\text{N}_2$  cooled to 0  $^\circ\text{C}$  with rapid stirring for 24 h. The reaction was worked up according to the general protocol. The crude reaction was purified by flash silica gel chromatography (90:10 hexanes : ethyl acetate) to afford **18** (82% ee, 121 mg, 41% Yield) as a white solid. The enantiomeric excess was determined to be 84% by chiral HPLC analysis (CHIRALPAK IA, 1.0 mL/min, 3.0% *i*-PrOH/hexane,  $\lambda = 210$  nm);  $t_{\text{R}}$ (major) = 20.837 min,  $t_{\text{R}}$ (minor) = 18.654 min.  $[\alpha]_{\text{D}}^{24} = +73.0^\circ$  ( $c = 1.00$ ,  $\text{CHCl}_3$ );  $^1\text{H}$  NMR (600 MHz,  $\text{CDCl}_3$ ):  $\delta$  7.38 – 7.31 (m, 3H), 7.30 – 7.22 (m, 3H), 7.19 – 7.14 (m, 2H), 7.13 – 7.07 (m, 2H), 4.97 (dd,  $J = 14.4, 10.6$  Hz, 2H), 4.81 (d,  $J = 14.3$  Hz, 1H), 4.17 (dd,  $J = 14.4, 4.0$  Hz, 1H), 3.18 (dddd,  $J = 14.1, 10.9, 7.1, 3.9$  Hz, 1H), 1.05 (d,  $J = 7.1$  Hz, 3H);  $^{13}\text{C}$  NMR (151 MHz,  $\text{CDCl}_3$ )  $\delta$  172.5, 141.3, 137.0, 129.7, 128.7, 128.6, 128.4, 128.4, 127.4, 76.7, 53.3, 35.0, 14.9; FTIR ( $\text{cm}^{-1}$ ): 2982, 1653, 1551, 1414, 1380, 1079, 699; mp = 110–112  $^\circ\text{C}$ . HRMS (ESI) (M+H) $^+$   $m/z$  calculated for  $[\text{C}_{23}\text{H}_{26}\text{N}_2\text{O}_3\text{F}_3]^+$ : 299.1390; found: 299.1386.

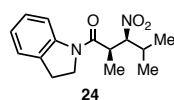

**(24)** According to general protocol E: **8** (69.4 mg, 0.1 mmol), 2-bromo-1-(indolin-1-yl)propan-1-one (**S21**, 254 mg, 1.0 mmol), 2-methyl-1-nitropropane (128  $\mu\text{L}$ , 1.2 mmol), sodium methoxide (59.4 mg, 1.1 mmol), diethyl zinc (1 M in hexane, 0.02 mmol, 20  $\mu\text{L}$ ) and anhydrous  $\text{Et}_2\text{O}$  (10.0 mL) were combined under  $\text{N}_2$  and stirred rapidly at rt for 24 h. The reaction was worked up according to the general protocol. NMR analysis of the crude reaction mixture revealed a 95:05 mixture of syn and anti isomers. The crude reaction was purified by flash silica gel chromatography (90:10 hexanes : ethyl acetate) to afford diastereomerically pure product **24** (99% ee, 242 mg, 88% Yield) as off-white solid. The enantiomeric excess was determined to be 99% by chiral HPLC analysis (CHIRALPAK IA, 1.0 mL/min, 1.0% *i*-PrOH/hexane,  $\lambda = 254$  nm);  $t_{\text{R}}$ (major) = 15.458 min,  $t_{\text{R}}$ (minor) = 17.698 min.  $[\alpha]_{\text{D}}^{24} = -58.3^\circ$  ( $c = 1.00$ ,  $\text{CHCl}_3$ );  $^1\text{H}$  NMR (400 MHz,  $\text{DMSO}-d_6$ ):  $\delta$  8.07 (d,  $J = 8.0$  Hz, 1H), 7.26 (d,  $J = 7.4$  Hz, 1H), 7.16 (t,  $J = 7.8$  Hz, 1H), 7.03 (t,  $J = 7.6$  Hz, 1H), 4.73 (dd,  $J = 8.8, 6.7$  Hz, 1H), 4.36 – 4.13 (m, 2H), 3.38 – 3.27 (m, 2H), 3.20 (t,  $J = 8.4$  Hz, 1H), 2.35 – 2.13 (m,  $J = 6.8$  Hz, 1H), 1.17 (d,  $J = 6.7$  Hz, 3H), 0.93 (t,  $J = 6.8$  Hz, 6H);  $^{13}\text{C}$  NMR (101 MHz,  $\text{DMSO}-d_6$ )  $\delta$  169.9, 142.6, 132.3, 127.0, 124.9, 123.9, 116.5, 95.5, 47.7, 39.5, 29.9, 27.4, 19.0, 17.6, 14.1; FTIR ( $\text{cm}^{-1}$ ): 2970, 1656, 1545, 1482, 1413, 1161, 758; mp = 129–131  $^\circ\text{C}$ . HRMS (ESI) (M+H) $^+$   $m/z$  calculated for  $[\text{C}_{15}\text{H}_{21}\text{N}_2\text{O}_3]^+$ : 277.1546; found: 277.1540.

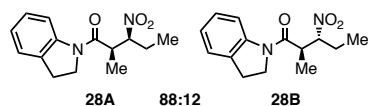

**(28)** According to general protocol E: **8** (69.4 mg, 0.1 mmol), 2-bromo-1-(indolin-1-yl)propan-1-one (**S21**, 254 mg, 1.0 mmol), 1-nitropropane (108  $\mu\text{L}$ , 1.2 mmol), sodium methoxide (59.4 mg, 1.1 mmol), diethyl zinc (1 M in hexane, 0.02 mmol, 20  $\mu\text{L}$ ) and anhydrous  $\text{Et}_2\text{O}$  (10.0 mL) were combined under  $\text{N}_2$  and stirred rapidly at rt for 24 h. The reaction was worked up according to the general protocol. NMR analysis of the crude reaction mixture revealed a 88:12 mixture of syn and anti isomers. The crude reaction was purified by flash silica gel chromatography (95:05  $\rightarrow$  80:20 hexanes : ethyl acetate) to afford two diastereomerically pure products **28** (225 mg, 86% combined).

**28A** (syn diastereomer) (85% ee, 198 mg, 76%, white solid): The enantiomeric excess was determined to be 85% by chiral HPLC analysis (CHIRALPAK IA, 1.0 mL/min, 1.0% *i*-PrOH/hexane,  $\lambda = 254$  nm);  $t_{\text{R}}$ (major) = 17.566 min,  $t_{\text{R}}$ (minor) = 21.375 min.  $[\alpha]_{\text{D}}^{24} = -59.4^\circ$  ( $c = 1.00$ ,  $\text{CHCl}_3$ );  $^1\text{H}$  NMR (400 MHz,  $\text{DMSO}-d_6$ ):  $\delta$  8.09 (d,  $J = 8.1$  Hz, 1H), 7.26 (dd,  $J = 7.5, 1.5$  Hz, 1H), 7.16 (t,  $J = 7.8, 1.5$  Hz, 1H), 7.04 (t,  $J = 7.4, 1.1$  Hz, 1H), 4.68 (td,  $J = 10.6, 9.3, 3.3$  Hz, 1H), 4.33 – 4.14 (m, 2H), 3.29 – 3.21 (m, 1H), 3.18 (t,  $J = 8.5$  Hz, 2H), 1.95 (ddq,  $J = 14.4, 10.6, 7.2$  Hz, 1H), 1.78 (dq,  $J = 14.7, 7.5, 3.3$  Hz, 1H), 1.16 (d,  $J = 6.7$  Hz, 3H), 0.86

(t,  $J = 7.3$  Hz, 3H);  $^{13}\text{C}$  NMR (101 MHz, DMSO- $d_6$ )  $\delta$  169.8, 142.5, 132.4, 127.0, 124.9, 124.0, 116.5, 92.8, 47.8, 42.0, 27.4, 25.2, 14.4, 10.2; FTIR ( $\text{cm}^{-1}$ ): 2973, 1653, 1548, 1482, 1263, 940, 759; mp = 72-74 °C. HRMS (ESI) ( $\text{M}+\text{H}$ ) $^+$   $m/z$  calculated for  $[\text{C}_{15}\text{H}_{21}\text{N}_2\text{O}_3]^+$ : 263.1317; found: 263.1386.

**28B** (anti diastereomer) (64%ee, 27 mg, 10%, white solid): The enantiomeric excess was determined to be 64% by chiral HPLC analysis (CHIRALPAK IA, 1.0 mL/min, 5.0% *i*-PrOH/hexane,  $\lambda=220$  nm);  $t_{\text{R}}$ (major) = 15.807 min,  $t_{\text{R}}$ (minor) = 11.990 min.  $[\alpha]_{\text{D}}^{24} = +21.9^\circ$  ( $c = 1.00$ ,  $\text{CHCl}_3$ );  $^1\text{H}$  NMR (400 MHz, DMSO- $d_6$ ):  $\delta$  8.00 (d,  $J = 8.0$  Hz, 1H), 7.25 (d,  $J = 7.3$  Hz, 1H), 7.14 (t,  $J = 7.7$  Hz, 1H), 7.01 (dd,  $J = 8.1, 6.9$  Hz, 1H), 4.86 (td,  $J = 9.7, 8.3, 3.6$  Hz, 1H), 4.21 (ddd,  $J = 9.6, 7.8, 2.6$  Hz, 2H), 3.45 – 3.35 (m, 1H), 3.20 (t,  $J = 8.5$  Hz, 2H), 2.16 – 2.02 (m, 1H), 1.92 – 1.77 (m, 1H), 1.20 (d,  $J = 6.9$  Hz, 3H), 0.89 (t,  $J = 7.4$  Hz, 3H);  $^{13}\text{C}$  NMR (101 MHz, DMSO- $d_6$ )  $\delta$  171.5, 142.6, 132.1, 127.0, 124.9, 123.8, 116.3, 90.1, 47.6, 40.6, 27.4, 23.7, 13.5, 9.2; FTIR ( $\text{cm}^{-1}$ ): 2975, 1655, 1548, 1420, 1278, 1132, 759; mp = 102-104 °C. HRMS (ESI) ( $\text{M}+\text{H}$ ) $^+$   $m/z$  calculated for  $[\text{C}_{15}\text{H}_{21}\text{N}_2\text{O}_3]^+$ : 263.1317; found: 263.1391.

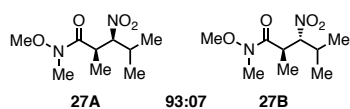

**(27)** According to general protocol E: **8** (69.4 mg, 0.1 mmol), 2-bromo-N-methoxy-N-methylpropanamide (196 mg, 1.0 mmol), 2-methyl-1-nitropropane (130  $\mu\text{L}$ , 1.2 mmol), potassium tert-butoxide (123 mg, 1.1 mmol), diethyl zinc (1 M in hexane, 0.02 mmol, 20  $\mu\text{L}$ ) and anhydrous  $\text{Et}_2\text{O}$  (10.0 mL) were combined under  $\text{N}_2$  and stirred rapidly at rt for 24 h. The reaction was worked up according to the general protocol. NMR analysis of the crude reaction mixture revealed a 93:07 mixture of syn and anti isomers. The crude reaction was purified by flash silica gel chromatography (90:10 hexanes : ethyl acetate) to afford a mixture of diastereomers **27** (90%ee, isolated dr 96:04, 161 mg, 74% Yield) as clear oil: The enantiomeric excess was determined to be 90% for **27A** by chiral HPLC analysis (CHIRALPAK IB, 1.0 mL/min, 2.0% *i*-PrOH/hexane,  $\lambda=210$  nm);  $t_{\text{R}}$ (major) = 7.159 min,  $t_{\text{R}}$ (minor) = 7.980 min.  $[\alpha]_{\text{D}}^{24} = -22.3^\circ$  ( $c = 1.00$ ,  $\text{CHCl}_3$ ); The enantiomeric excess was determined to be 44% for **27B** by chiral HPLC analysis (CHIRALPAK IB, 1.0 mL/min, 2.0% *i*-PrOH/hexane,  $\lambda=210$  nm);  $t_{\text{R}}$ (major) = 13.241 min,  $t_{\text{R}}$ (minor) = 12.513 min.  $^1\text{H}$  NMR (400 MHz,  $\text{CDCl}_3$ ): mixture of diastereomers; useful diagnostic peaks for each compound are listed. See attached spectra for details):  $\delta$  **27A**: 4.68 (dd,  $J = 10.4, 5.2$  Hz, 1H), 3.75 (s, 3H), 3.58 (dq,  $J = 10.1, 6.8$  Hz, 1H), 3.18 (s, 3H), 2.15 (pd,  $J = 6.9, 5.3$  Hz, 1H), 1.17 (d,  $J = 6.8$  Hz, 3H), 0.97 (dd,  $J = 6.9, 2.7$  Hz, 6H), **27B**: 4.81 (dd,  $J = 11.0, 3.1$  Hz, 1H), 1.12 (d,  $J = 6.9$  Hz, 3H);  $^{13}\text{C}$  NMR (101 MHz,  $\text{CDCl}_3$ )  $\delta$  **27A**: 173.4, 95.6, 61.7, 36.8, 32.3, 30.2, 19.7, 17.0, 15.4, **27B**: 93.1, 61.4, 27.8, 20.6, 13.8; FTIR ( $\text{cm}^{-1}$ ): 2973, 1664, 1548, 1464, 1376, 1178, 996. HRMS (ESI) ( $\text{M}+\text{H}$ ) $^+$   $m/z$  calculated for  $[\text{C}_9\text{H}_{19}\text{N}_2\text{O}_4]^+$ : 219.1267; found: 219.1339.

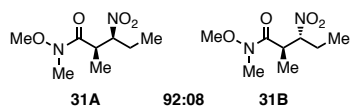

**(31)** According to general protocol E: **8** (69.4 mg, 0.1 mmol), 2-bromo-N-methoxy-N-methylpropanamide (196 mg, 1.0 mmol), 1-nitropropane (108  $\mu\text{L}$ , 1.2 mmol), sodium methoxide (59.4 mg, 1.1 mmol), diethyl zinc (1 M in hexane, 0.02 mmol, 20  $\mu\text{L}$ ) and anhydrous  $\text{Et}_2\text{O}$  (10.0 mL) were combined under  $\text{N}_2$  and stirred rapidly at rt for 24 h. The reaction was worked up according to the general protocol. NMR analysis of the crude reaction mixture revealed a 92:08 mixture of syn and anti isomers. The crude reaction was purified by flash silica gel chromatography (95:05  $\rightarrow$  90:10 hexanes : ethyl acetate) to afford a mixture of diastereomers **31** (85%ee, isolated dr 93:07, 147 mg, 74% Yield) as clear oil: The enantiomeric excess was determined to be 85% for **31A** by chiral HPLC analysis (CHIRALPAK IF, 1.0 mL/min, 2.0% *i*-PrOH/hexane,  $\lambda=210$  nm);  $t_{\text{R}}$ (major) = 11.489 min,  $t_{\text{R}}$ (minor) = 14.258 min.  $[\alpha]_{\text{D}}^{24} = -47.3^\circ$  ( $c = 1.00$ ,  $\text{CHCl}_3$ ); The enantiomeric excess was determined to be 52% for **31B** by chiral HPLC analysis (CHIRALPAK IB, 1.0 mL/min, 2.0% *i*-PrOH/hexane,  $\lambda=210$  nm);  $t_{\text{R}}$ (major) = 28.742 min,  $t_{\text{R}}$ (minor) = 33.026 min.  $^1\text{H}$  NMR (600 MHz,  $\text{CDCl}_3$ ): mixture of diastereomers; useful diagnostic peaks for each compound are listed. See attached spectra for details):  $\delta$  **31A**: 4.63 (td,  $J = 10.6, 3.0$  Hz, 1H), 3.74 (s, 3H), 3.42 (dq,  $J = 13.3, 6.8$  Hz, 1H), 3.20 (s, 3H), 1.89 (ddq,  $J = 14.4, 10.5, 7.2$  Hz, 1H), 1.77 (dq,  $J = 14.8, 7.4, 3.0$  Hz, 1H), 1.17 (d,  $J = 6.8$  Hz, 3H), 0.94 (t,  $J = 7.3$  Hz, 3H), **31B**: 4.81 (td,  $J = 10.2, 8.7, 3.5$  Hz, 1H), 3.78 (s, 3H), 3.52 (dq,  $J = 8.5$  Hz, 1H), 3.18 (s, 3H), 2.08 (ddt,  $J = 11.0, 7.5, 3.6$  Hz, 1H), 0.98 (t,  $J = 7.4$  Hz, 3H),  $^{13}\text{C}$  NMR (101 MHz,  $\text{CDCl}_3$ )  $\delta$  **31A**: 172.9, 92.8, 61.8, 39.4, 32.1, 25.9, 15.0, 10.3, **31B**: 89.5, 61.4, 38.1, 31.9, 23.9, 13.6, 9.3; FTIR ( $\text{cm}^{-1}$ ):



1): 2975, 1663, 1550, 1462, 1376, 1178, 994. HRMS (ESI) (M+H)<sup>+</sup> m/z calculated for [C<sub>8</sub>H<sub>17</sub>N<sub>2</sub>O<sub>4</sub>]<sup>+</sup>: 205.1110; found: 205.1183.

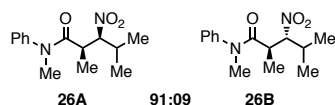

**(26)** According to general protocol E: **8** (69.4 mg, 0.1 mmol), 2-bromo-N-methyl-N-Phenylpropanamide (**S20**, 242 mg, 1.0 mmol), 2-methyl-1-nitropropane (128  $\mu$ L, 1.2 mmol), sodium methoxide (59.4 mg, 1.1 mmol), diethyl zinc (1 M in hexane, 0.02 mmol, 20  $\mu$ L) and anhydrous Et<sub>2</sub>O (10.0 mL) were combined under N<sub>2</sub> and stirred rapidly at rt for 24 h. The reaction was worked up according to the general protocol. NMR analysis of the crude reaction mixture revealed a 91:09 mixture of syn and anti isomers. The crude reaction was purified by flash silica gel chromatography (90:10:01 hexanes:ethyl acetate : acetic acid) to afford diastereomerically pure product **26** (211 mg, 80% combined).

**26A** (syn diastereomer) (90%ee, 170mg, 64%, clear oil): The enantiomeric excess was determined to be 90% by chiral HPLC analysis (CHIRALPAK ID, 1.0 mL/min, 1.0% *i*-PrOH/hexane,  $\lambda$ =220 nm); t<sub>R</sub>(major) = 15.659 min, t<sub>R</sub>(minor) = 17.670 min. [ $\alpha$ ]<sub>D</sub><sup>24</sup>=-135.2° (c = 1.00, CHCl<sub>3</sub>); <sup>1</sup>H NMR (400 MHz, CDCl<sub>3</sub>):  $\delta$  7.51 – 7.39 (m, 3H), 7.23 – 7.18 (m, 2H), 4.72 (dd, *J* = 10.3, 4.5 Hz, 1H), 3.27 (s, 3H), 2.99 (dq, *J* = 10.3, 6.6 Hz, 1H), 2.10 (pd, *J* = 6.9, 4.5 Hz, 1H), 1.12 (d, *J* = 6.6 Hz, 3H), 0.99 (d, *J* = 6.9 Hz, 3H), 0.82 (d, *J* = 6.8 Hz, 3H); <sup>13</sup>C NMR (101 MHz, CDCl<sub>3</sub>)  $\delta$  172.0, 142.9, 130.1, 128.6, 127.0, 96.2, 38.1, 37.7, 30.0, 20.0, 16.9, 15.9; FTIR (cm<sup>-1</sup>): 2972, 1653, 1541, 1496, 1271, 1032, 703. HRMS (ESI) (M+H)<sup>+</sup> m/z calculated for [C<sub>14</sub>H<sub>21</sub>N<sub>2</sub>O<sub>3</sub>]<sup>+</sup>: 265.1474; found: 265.1536.

**26B** (anti diastereomer) (43%ee, 41mg, 16%, combined **26A** and **26B**, clear oil): The enantiomeric excess was determined to be 43% by chiral HPLC analysis (CHIRALPAK IA, 1.0 mL/min, 5.0% *i*-PrOH/hexane,  $\lambda$ =220 nm); t<sub>R</sub>(major) = 11.390 min, t<sub>R</sub>(minor) = 7.949 min. The diastereomer **26B** is contaminated with diastereomer **26A**: <sup>1</sup>H NMR (400 MHz, CDCl<sub>3</sub>: mixture of diastereomers; useful diagnostic peaks for each compound are listed. See attached spectra for details):  $\delta$  **26A**: 4.72 (dd, *J* = 10.3, 4.5 Hz, 1H), 3.27 (s, 3H), 2.99 (dq, *J* = 10.3, 6.6 Hz, 1H), 2.10 (pd, *J* = 6.9, 4.5 Hz, 1H), 1.12 (d, *J* = 6.6 Hz, 3H), 0.99 (d, *J* = 6.8 Hz, 3H), 0.83 (d, *J* = 6.8 Hz, 3H), **26B**: 4.82 (dd, *J* = 10.7, 2.9 Hz, 1H), 3.23 (s, 3H), 3.16 (dq, *J* = 10.7, 7.1 Hz, 1H), 2.03 (td, *J* = 6.9, 2.6 Hz, 1H), 1.08 (d, *J* = 6.9 Hz, 3H), 1.02 (d, *J* = 7.0 Hz, 3H), 0.69 (d, *J* = 6.8 Hz, 3H); <sup>13</sup>C NMR (101 MHz, CDCl<sub>3</sub>)  $\delta$  **26A**: 172.0, 142.9, 130.1, 128.6, 127.0, 96.2, 38.1, 37.7, 30.0, 20.0, 16.9, 15.9, **26B**: 173.0, 143.2, 129.8, 128.2, 127.4, 93.9, 37.6, 37.5, 27.8, 20.5, 16.0, 14.5; FTIR (cm<sup>-1</sup>): 2969, 1654, 1538, 1458, 1274, 1123, 701. HRMS (ESI) (M+H)<sup>+</sup> m/z calculated for [C<sub>14</sub>H<sub>21</sub>N<sub>2</sub>O<sub>3</sub>]<sup>+</sup>: 265.1474; found: 265.1544.

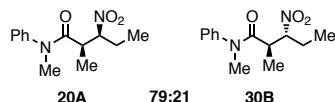

**(30)** According to general protocol E: **8** (69.4 mg, 0.1 mmol), 2-bromo-N-methyl-N-Phenylpropanamide (**S20**, 242 mg, 1.0 mmol), 1-nitropropane (108  $\mu$ L, 1.2 mmol), sodium methoxide (59.4 mg, 1.1 mmol), diethyl zinc (1 M in hexane, 0.02 mmol, 20  $\mu$ L) and anhydrous Et<sub>2</sub>O (10.0 mL) were combined under N<sub>2</sub> and stirred rapidly at rt for 24 h. The reaction was worked up according to the general protocol. NMR analysis of the crude reaction mixture revealed a 79:21 mixture of syn and anti isomers. The crude reaction was purified by flash silica gel chromatography (95:05  $\rightarrow$  85:15 hexanes : ethyl acetate) to afford two diastereomerically pure products **30** (210 mg, 84% combined).

**30A** (syn diastereomer) (84%ee, 168mg, 67%, clear oil): The enantiomeric excess was determined to be 84% by chiral HPLC analysis (CHIRALPAK IB, 1.0 mL/min, 1.0% *i*-PrOH/hexane,  $\lambda$ =220 nm); t<sub>R</sub>(major) = 13.082 min, t<sub>R</sub>(minor) = 14.879 min. [ $\alpha$ ]<sub>D</sub><sup>24</sup>=-101.1° (c = 1.00, CHCl<sub>3</sub>); <sup>1</sup>H NMR (400 MHz, CDCl<sub>3</sub>):  $\delta$  7.52 – 7.44 (m, 2H), 7.44 – 7.38 (m, 1H), 7.20 – 7.15 (m, 2H), 4.65 (td, *J* = 10.4, 3.5 Hz, 1H), 3.27 (s, 3H), 2.87 (dq, *J* = 10.3, 6.7 Hz, 1H), 1.92 – 1.68 (m, 2H), 1.07 (d, *J* = 6.7 Hz, 3H), 0.91 (t, *J* = 7.3 Hz, 3H); <sup>13</sup>C NMR (101 MHz, CDCl<sub>3</sub>)  $\delta$  171.9, 142.9, 130.2, 128.5, 127.2, 93.4, 40.7, 37.6, 25.8, 15.6, 10.4; FTIR (cm<sup>-1</sup>): 2974, 1655, 1596, 1549, 1496, 1390, 1120, 1029, 701. HRMS (ESI) (M+H)<sup>+</sup> m/z calculated for [C<sub>13</sub>H<sub>19</sub>N<sub>2</sub>O<sub>3</sub>]<sup>+</sup>: 251.1317; found: 251.1387.

**30B** (anti diastereomer) (54%ee, 42mg, 17%, white solid): The enantiomeric excess was determined to be 54% by chiral HPLC analysis (CHIRALPAK IB, 1.0 mL/min, 1.0% *i*-PrOH/hexane,  $\lambda$ =220 nm); t<sub>R</sub>(major) =

27.086 min,  $t_R(\text{minor}) = 33.261$  min.  $[\alpha]_D^{24} = +27.5^\circ$  ( $c = 1.00$ ,  $\text{CHCl}_3$ );  $^1\text{H NMR}$  (400 MHz,  $\text{CDCl}_3$ ):  $\delta$  7.47 (dd,  $J = 8.2, 7.0$  Hz, 2H), 7.41 – 7.37 (m, 1H), 7.34 – 7.29 (m, 2H), 4.81 (td,  $J = 10.0, 8.9, 3.5$  Hz, 1H), 3.23 (s, 3H), 3.05 (dq,  $J = 10.1, 7.0$  Hz, 1H), 1.93 (dq,  $J = 14.9, 7.5, 3.5$  Hz, 1H), 1.66 (ddq,  $J = 14.7, 9.0, 7.3$  Hz, 1H), 1.04 (d,  $J = 7.0$  Hz, 3H), 0.85 (t,  $J = 7.4$  Hz, 3H);  $^{13}\text{C NMR}$  (101 MHz,  $\text{CDCl}_3$ )  $\delta$  172.9, 143.2, 129.9, 128.2, 127.4, 90.5, 39.0, 37.6, 23.9, 14.4, 9.4; FTIR ( $\text{cm}^{-1}$ ): 2975, 1653, 1558, 1446, 1378, 1280, 1071, 709; mp = 95–97 °C. HRMS (ESI) (M+H)<sup>+</sup>  $m/z$  calculated for  $[\text{C}_{13}\text{H}_{19}\text{N}_2\text{O}_3]^+$ : 251.1317; found: 251.1387.

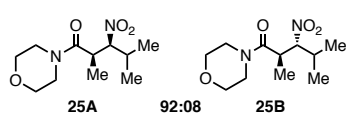

**(25)** According to general protocol E: **8** (69.4 mg, 0.1 mmol),  $\alpha$ -bromomorpholinopropanamide (**S19**, 222 mg, 1.0 mmol), 2-methyl-1-nitropropane (128  $\mu\text{L}$ , 1.2 mmol), sodium methoxide (59.4 mg, 1.1 mmol), diethyl zinc (1 M in hexane, 0.02 mmol, 20  $\mu\text{L}$ ) and anhydrous  $\text{Et}_2\text{O}$  (10.0 mL) were combined under  $\text{N}_2$  and stirred rapidly at rt for 24 h. The reaction was worked up according to the general protocol. NMR analysis of the crude reaction mixture revealed a 92:08 mixture of syn and anti isomers. The crude reaction was purified by flash silica gel chromatography (90:10:1  $\rightarrow$  80:20:1 hexanes : ethyl acetate : acetic acid) to afford single diastereomer **25** (88% ee, 199 mg, 82%) as clear oil. The enantiomeric excess was determined to be 88% by chiral HPLC analysis (CHIRALPAK IA, 1.0 mL/min, 5.0% *i*-PrOH/hexane,  $\lambda = 220$  nm);  $t_R(\text{major}) = 8.623$  min,  $t_R(\text{minor}) = 10.790$  min.  $[\alpha]_D^{24} = -23.0^\circ$  ( $c = 1.00$ ,  $\text{CHCl}_3$ );  $^1\text{H NMR}$  (400 MHz,  $\text{CDCl}_3$ ):  $\delta$  4.80 (ddd,  $J = 10.3, 4.8, 1.3$  Hz, 1H), 3.77 – 3.63 (m, 5H), 3.62 – 3.51 (m, 3H), 3.34 (dq,  $J = 10.5, 6.9, 1.0$  Hz, 1H), 2.20 (dtdd,  $J = 13.6, 6.8, 4.9, 1.2$  Hz, 1H), 1.16 (dd,  $J = 6.8, 1.3$  Hz, 3H), 0.97 (ddd,  $J = 14.0, 6.9, 1.2$  Hz, 6H);  $^{13}\text{C NMR}$  (101 MHz,  $\text{CDCl}_3$ )  $\delta$  170.6, 95.8, 66.6, 46.1, 42.1, 36.6, 29.8, 19.7, 16.5, 15.7; FTIR ( $\text{cm}^{-1}$ ): 2971, 1639, 1545, 1437, 1226, 1116, 849. HRMS (ESI) (M+H)<sup>+</sup>  $m/z$  calculated for  $[\text{C}_{11}\text{H}_{21}\text{N}_2\text{O}_4]^+$ : 245.1495; found: 245.1490.

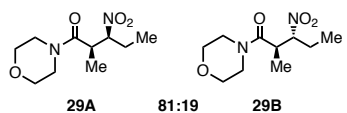

**(29)** According to general protocol E: **8** (69.4 mg, 0.1 mmol),  $\alpha$ -bromomorpholinopropanamide (**S19**, 222 mg, 1.0 mmol), 1-nitropropane (108  $\mu\text{L}$ , 1.2 mmol), sodium methoxide (59.4 mg, 1.1 mmol), diethyl zinc (1 M in hexane, 0.02 mmol, 20  $\mu\text{L}$ ) and anhydrous  $\text{Et}_2\text{O}$  (10.0 mL) were combined under  $\text{N}_2$  and stirred rapidly at rt for 24 h. The reaction was worked up according to the general protocol. NMR analysis of the crude reaction mixture revealed an 81:19 mixture of syn and anti isomers. The crude reaction was purified by flash silica gel chromatography (90:10:1  $\rightarrow$  75:25:1 hexanes : ethyl acetate : acetic acid) to afford two diastereomerically pure products **29** (200 mg, 87% combined).

**29A** (syn diastereomer) (82% ee, 164 mg, 71%, clear oil): The enantiomeric excess was determined to be 82% by chiral HPLC analysis (CHIRALPAK IA, 1.0 mL/min, 5.0% *i*-PrOH/hexane,  $\lambda = 220$  nm);  $t_R(\text{major}) = 11.920$  min,  $t_R(\text{minor}) = 9.460$  min.  $[\alpha]_D^{24} = -28.9^\circ$  ( $c = 1.00$ ,  $\text{CHCl}_3$ );  $^1\text{H NMR}$  (400 MHz,  $\text{CDCl}_3$ ):  $\delta$  4.80 (ddd,  $J = 10.3, 4.8, 1.3$  Hz, 1H), 3.77 – 3.63 (m, 5H), 3.62 – 3.51 (m, 3H), 3.34 (dq,  $J = 10.5, 6.9, 1.0$  Hz, 1H), 2.20 (dtdd,  $J = 13.6, 6.8, 4.9, 1.2$  Hz, 1H), 1.16 (dd,  $J = 6.8, 1.3$  Hz, 3H), 0.97 (ddd,  $J = 14.0, 6.9, 1.2$  Hz, 6H);  $^{13}\text{C NMR}$  (101 MHz,  $\text{CDCl}_3$ )  $\delta$  170.6, 95.8, 66.6, 46.1, 42.1, 36.6, 29.8, 19.7, 16.5, 15.7; FTIR ( $\text{cm}^{-1}$ ): 2974, 2858, 1645, 1548, 1457, 1225, 1116, 1028, 813. HRMS (ESI) (M+H)<sup>+</sup>  $m/z$  calculated for  $[\text{C}_{10}\text{H}_{19}\text{N}_2\text{O}_4]^+$ : 231.1267; found: 231.1337.

**29B** (anti diastereomer) (49% ee, 36 mg, 16%, clear oil): The enantiomeric excess was determined to be 49% by chiral HPLC analysis (CHIRALPAK IA, 1.0 mL/min, 5.0% *i*-PrOH/hexane,  $\lambda = 220$  nm);  $t_R(\text{major}) = 16.599$  min,  $t_R(\text{minor}) = 19.398$  min.  $[\alpha]_D^{24} = +31.2^\circ$  ( $c = 1.00$ ,  $\text{CHCl}_3$ );  $^1\text{H NMR}$  (600 MHz,  $\text{CDCl}_3$ ):  $\delta$  4.86 (td,  $J = 9.8, 8.6, 3.5$  Hz, 1H), 3.77 – 3.58 (m, 6H), 3.55 – 3.45 (m, 2H), 3.38 (dq,  $J = 9.8, 7.2$  Hz, 1H), 2.10 (dq,  $J = 15.0, 7.5, 3.5$  Hz, 1H), 1.85 (ddq,  $J = 14.7, 8.8, 7.3$  Hz, 1H), 1.17 (d,  $J = 7.2$  Hz, 3H), 0.98 (t,  $J = 7.4$  Hz, 3H);  $^{13}\text{C NMR}$  (101 MHz,  $\text{CDCl}_3$ )  $\delta$  171.56, 90.17, 66.60, 46.18, 42.32, 37.49, 24.05, 14.06, 9.36; FTIR ( $\text{cm}^{-1}$ ): 2974, 2857, 1643, 1548, 1439, 1378, 1115, 809. HRMS (ESI) (M+H)<sup>+</sup>  $m/z$  calculated for  $[\text{C}_{10}\text{H}_{19}\text{N}_2\text{O}_4]^+$ : 231.1267; found: 231.1340.

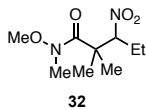

**(32)** According to general protocol E: **8** (69.4 mg, 0.1 mmol), 2-bromo-*N*-methoxy-*N*,2-dimethylpropanamide (210 mg, 1.0 mmol), 1-nitropropane (107  $\mu$ L, 1.2 mmol), sodium methoxide (59.4 mg, 1.1 mmol), diethyl zinc (1 M in hexane, 0.02 mmol, 20  $\mu$ L) and anhydrous Et<sub>2</sub>O (10.0 mL) were combined under N<sub>2</sub> and stirred rapidly at rt for 24 h. The reaction was worked up according to the general protocol. The crude reaction was purified by flash silica gel chromatography (90:10 hexanes : ethyl acetate) to afford **32** (78%ee, 83 mg, 38%) as clear oil. The enantiomeric excess was determined to be 78% by chiral HPLC analysis (CHIRALPAK IA, 1.0 mL/min, 1.0% *i*-PrOH/hexane,  $\lambda$ =220 nm);  $t_R$ (major) = 11.341 min,  $t_R$ (minor) = 12.722 min.  $[\alpha]_D^{24} = +29.1^\circ$  ( $c$  = 1.00, CHCl<sub>3</sub>); <sup>1</sup>H NMR (400 MHz, CDCl<sub>3</sub>):  $\delta$  5.07 (dd,  $J$  = 11.6, 2.2 Hz, 1H), 3.73 (s, 3H), 3.19 (s, 3H), 2.10 (ddq,  $J$  = 14.3, 11.7, 7.1 Hz, 1H), 1.58 (dq,  $J$  = 14.8, 7.4, 2.2 Hz, 1H), 1.33 (s, 6H), 0.95 (t,  $J$  = 7.3 Hz, 3H); <sup>13</sup>C NMR (101 MHz, CDCl<sub>3</sub>)  $\delta$  174.6, 94.3, 60.8, 46.5, 34.1, 22.3, 22.1, 20.3, 11.2; FTIR (cm<sup>-1</sup>): 2976, 1649, 1548, 1462, 1365, 1295, 997. HRMS (ESI) (M+H)<sup>+</sup>  $m/z$  calculated for [C<sub>9</sub>H<sub>19</sub>N<sub>2</sub>O<sub>4</sub>]<sup>+</sup>: 219.1267; found: 219.1331.

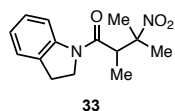

**(33)** According to general protocol E: **8** (69.4 mg, 0.1 mmol), 2-bromo-1-(indolin-1-yl)propan-1-one (**S21**, 254 mg, 1.0 mmol), 2-nitropropane (108  $\mu$ L, 1.2 mmol), sodium methoxide (59.4 mg, 1.1 mmol), diethyl zinc (1 M in hexane, 0.02 mmol, 20  $\mu$ L) and anhydrous Et<sub>2</sub>O (10.0 mL) were combined under N<sub>2</sub> and stirred rapidly at rt for 24 h. The reaction was worked up according to the general protocol. The crude reaction was purified by flash silica gel chromatography (95:05 hexanes : ethyl acetate) to afford **33** (61%ee, 107 mg, 41%) as white solid. The enantiomeric excess was determined to be 61% by chiral HPLC analysis (CHIRALPAK IA, 1.0 mL/min, 1.0% *i*-PrOH/hexane,  $\lambda$ =220 nm);  $t_R$ (major) = 21.497 min,  $t_R$ (minor) = 16.497 min.  $[\alpha]_D^{24} = -18.2^\circ$  ( $c$  = 1.00, CHCl<sub>3</sub>); <sup>1</sup>H NMR (400 MHz, CDCl<sub>3</sub>):  $\delta$  8.20 (d,  $J$  = 8.0 Hz, 1H), 7.22 – 7.16 (m, 2H), 7.07 – 7.02 (m, 1H), 4.34 (td,  $J$  = 9.7, 7.6 Hz, 1H), 4.15 (td,  $J$  = 9.8, 7.2 Hz, 1H), 3.58 (q,  $J$  = 7.1 Hz, 1H), 3.33 – 3.17 (m, 2H), 1.78 (s, 3H), 1.75 (s, 3H), 1.27 (d,  $J$  = 7.1 Hz, 3H); <sup>13</sup>C NMR (101 MHz, CDCl<sub>3</sub>)  $\delta$  170.8, 142.6, 131.4, 127.5, 124.6, 124.1, 117.5, 91.0, 48.6, 45.5, 27.9, 23.9, 13.7; FTIR (cm<sup>-1</sup>): 2988, 1653, 1539, 1482, 1418, 1264, 757; mp = 126-128 °C. HRMS (ESI) (M+H)<sup>+</sup>  $m/z$  calculated for [C<sub>14</sub>H<sub>19</sub>N<sub>2</sub>O<sub>3</sub>]<sup>+</sup>: 263.1317; found: 263.1386.

## 11. Down Stream Functionalization of Alkylated Products

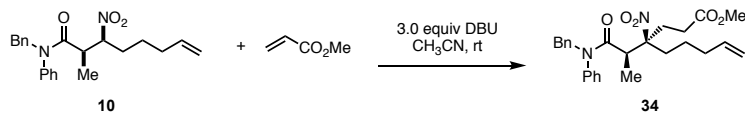

| Entry | 10<br>dr | 10<br>% ee | 34<br>dr | 34<br>% ee <sup>a</sup> | % Yield<br>34 |
|-------|----------|------------|----------|-------------------------|---------------|
| 1     | >95:05   | 91         | >95:05   | 91                      | 84            |
| 2     | 79:21    | 91/82      | >95:05   | 89                      | 83            |

<sup>a</sup> Determined by chiral HPLC analysis

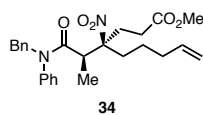

(**34**) To a 25 mL round bottom flask equipped with a magnetic stir bar was added **10** (Run 1: 200 mg, 0.54 mmol, dr: >95:05, 91% ee), (Run 2: 200 mg, 0.54 mmol, dr: >79:21, 91/82% ee), acetonitrile (5.5 mL), methyl acrylate (147  $\mu$ L, 1.63 mmol), and DBU (243  $\mu$ L, 1.63 mmol). The reaction was sealed with a polypropylene cap. The resulting homogenous solution was stirred at rt for 1 h. The reaction was diluted with ethyl acetate (10 mL), washed with brine (2X 10 mL), dried over magnesium sulfate and concentrated *in vacuo*. NMR analysis of the crude reaction mixture revealed a >95:05 mixture of syn- and anti-isomers for both runs. The crude reaction was purified by flash silica gel chromatography (90:10 hexanes : ethyl acetate) to afford **34** (Run 1: 91%ee, 205mg, 84% yield), (Run 2: 89%ee, 202mg, 83% yield) as a clear oil. The enantiomeric excess was determined to be 91% for Run 1 and 89% for Run 2 by chiral HPLC analysis (CHIRALPAK IF, 1.0 mL/min, 3.0% *i*-PrOH/hexane,  $\lambda$ =220 nm);  $t_R$ (major) = 31.502 min,  $t_R$ (minor) = 25.165 min.  $[\alpha]_D^{24} = -30.8^\circ$  ( $c$  = 1.00, CHCl<sub>3</sub>); <sup>1</sup>H NMR (600 MHz, CDCl<sub>3</sub>):  $\delta$  7.34 (dd,  $J$  = 5.2, 2.0 Hz, 1H), 7.26 (d,  $J$  = 5.9 Hz, 2H), 7.19 – 7.13 (m, 1H), 6.97 (s, 1H), 5.70 (ddt,  $J$  = 17.0, 10.3, 6.7 Hz, 0H), 5.03 – 4.95 (m, 1H), 4.85 (s, 1H), 3.67 (s, 1H), 3.03 (q,  $J$  = 7.1 Hz, 0H), 2.48 (ddd,  $J$  = 14.1, 10.5, 5.3 Hz, 0H), 2.40 – 2.25 (m, 1H), 2.14 (ddd,  $J$  = 14.6, 12.7, 4.1 Hz, 0H), 2.02 (q,  $J$  = 7.2 Hz, 1H), 1.95 (ddd,  $J$  = 14.6, 12.5, 4.7 Hz, 0H), 1.33 (dddd,  $J$  = 19.8, 12.4, 7.2, 4.6 Hz, 0H), 1.26 – 1.16 (m, 1H); <sup>13</sup>C NMR (151 MHz, CDCl<sub>3</sub>)  $\delta$  172.8, 171.8, 141.5, 137.4, 137.0, 129.8, 128.9, 128.5, 128.4, 128.3, 127.5, 115.6, 94.9, 53.2, 51.8, 42.4, 34.4, 33.6, 29.0, 28.5, 23.2, 14.3; FTIR (cm<sup>-1</sup>): 2950, 1738, 1660, 1540, 1403, 1198, 993, 702. HRMS (ESI) (M+H)<sup>+</sup>  $m/z$  calculated for [C<sub>26</sub>H<sub>33</sub>N<sub>2</sub>O<sub>5</sub>]<sup>+</sup>: 453.2311; found: 453.2390.

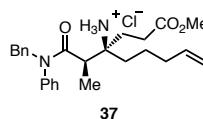

(**37**): **34** (200 mg, 0.44 mmol, 91%ee), ethyl acetate (13 mL), ethanol (18 mL), and HCl (6 M, 15.8 mmol, 2.64 mL) were added to a 100 mL round bottom flask equipped with a magnetic stir bar. The flask was cooled to 0 °C and Zn dust (1.44g, 22.1 mmol) was added in 3 portions over 10 minutes under air. The mixture was warmed to room temperature and stirred for 1 h. The resulting mixture was quenched with brine (50 mL) and extracted with ethyl acetate (50mL, 1x). The aqueous layer contains insoluble zinc salts was filtered through celite and back extracted with ethyl acetate (30mL, 3x). The combined organic layer was dried over magnesium sulfate and concentrated *in vacuo* to afford **37** (88%ee, 189mg, 94% yield) as a white solid. The enantiomeric excess was determined to be 88% by reverse-phase chiral HPLC analysis (CHIRALPAK IF-3, 1.0 mL/min, 10% CH<sub>3</sub>CN/water isocratic 1 minute, then 30 minute gradient 35% CH<sub>3</sub>CN/water, 30 minute isocratic 35% CH<sub>3</sub>CN/water  $\lambda$ =210 nm);  $t_R$ (major) = 38.342 min,  $t_R$ (minor) = 41.382 min.  $[\alpha]_D^{24} = -20.3^\circ$  ( $c$  = 1.00, CHCl<sub>3</sub>); <sup>1</sup>H NMR (600 MHz, CDCl<sub>3</sub>):  $\delta$  8.37 (s, 3H), 7.38 (dd,  $J$  = 5.1, 1.9 Hz, 3H), 7.28 (dd,  $J$  = 5.0, 1.9 Hz, 3H), 7.13 (dd,  $J$  = 6.6, 2.9 Hz, 2H), 6.93 (dd,  $J$  = 6.4, 2.8 Hz, 2H), 5.67 (ddt,  $J$  = 16.9, 10.2, 6.6 Hz, 1H), 4.95 – 4.89 (m, 3H), 4.81 (d,  $J$  = 14.0 Hz, 1H), 3.71 (s, 3H), 2.72 (ddd,  $J$  = 16.7, 11.3, 5.5 Hz, 1H), 2.41 (q,  $J$  = 7.1 Hz, 1H), 2.31 (ddd,  $J$  = 16.3, 11.1, 4.8 Hz, 1H), 2.19 (ddd,  $J$  = 15.5, 11.1, 5.6 Hz, 1H), 2.09 – 1.92 (m, 2H), 1.93 – 1.72 (m, 3H), 1.27 (d,  $J$  = 7.1 Hz, 3H), 1.21 – 1.11 (m, 1H), 0.82 (dh,  $J$  = 12.8, 6.3 Hz, 1H); <sup>13</sup>C NMR (101 MHz, CDCl<sub>3</sub>)  $\delta$  175.3, 172.8, 140.5, 137.4, 136.2, 130.1, 129.1, 128.9, 128.6, 127.9, 127.8, 115.7, 61.0, 53.1, 52.1, 39.2, 33.0, 31.2, 29.4, 28.0, 21.5, 12.8; FTIR (cm<sup>-1</sup>): 2942, 1735, 1634, 1592, 1493, 1201, 914, 703; mp = 68-70 °C. HRMS (ESI) (M)<sup>+</sup>  $m/z$  calculated for [C<sub>26</sub>H<sub>35</sub>N<sub>2</sub>O<sub>3</sub>]<sup>+</sup>: 423.2642; found: 423.2652.

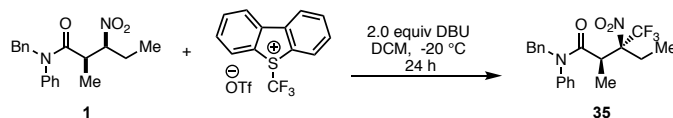

| Entry | <b>1</b><br>dr | <b>1</b><br>% ee | <b>35</b><br>dr | <b>35</b><br>% ee <sup>a</sup> | % Yield<br><b>35</b> |
|-------|----------------|------------------|-----------------|--------------------------------|----------------------|
| 1     | >95:05         | 90               | >95:05          | 89                             | 67                   |
| 2     | 76:24          | 90/84            | >95:05          | 86                             | 67                   |

<sup>a</sup> Determined by chiral HPLC analysis

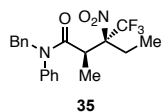

**(35)** A hot 25 mL round bottom flask equipped with a magnetic stir bar and a rubber septum was attached via needle to a double manifold and cooled under vacuum. Once cooled, the flask was backfilled with N<sub>2</sub>, the septum was removed, and **1** (Run 1: 215 mg, 0.66 mmol, dr: >95:05, 90% ee), (Run 2: 215 mg, 0.66 mmol, dr: 76:24, 90/84% ee), and Umemoto's reagent (344 mg, 0.86 mmol) were added. The septum was replaced, the flask was reattached to a double manifold and evacuated and backfilled with N<sub>2</sub> three times. Anhydrous dichloromethane was added via syringe and the flask was lowered into a pre-cooled -25 °C cooling bath and stirred. DBU (197 μL, 1.32 mmol) was then added dropwise via syringe. The resulting homogenous solution was stirred at -25 °C for 24 h after which the flask was removed from the cooling unit and the septum was removed. The reaction mixture was washed with brine (10 mL, 1x), dried over magnesium sulfate, and concentrated *in vacuo* onto Celite. The product was purified by silica gel flash chromatography (100:0 → 95:05 hexanes : ethyl acetate) to afford **35** (Run 1: 88% ee, 174mg, 67% yield), (Run 2: 86% ee, 174mg, 67% yield) as a clear oil. The enantiomeric excess was determined to be 89% for Run 1 and 86% for Run 2 by chiral HPLC analysis (CHIRALPAK IA, 1.0 mL/min, 2.0% *i*-PrOH/hexane, λ=254 nm); t<sub>R</sub>(major) = 9.605 min, t<sub>R</sub>(minor) = 6.687 min. [α]<sub>D</sub><sup>24</sup> = -59.1° (c = 1.00, CHCl<sub>3</sub>); <sup>1</sup>H NMR (600 MHz, CDCl<sub>3</sub>): δ 7.40 – 7.34 (m, 3H), 7.31 – 7.24 (m, 3H), 7.16 – 7.11 (m, 2H), 7.05 – 6.94 (m, 2H), 4.81 (q, 2H), 3.51 (q, J = 7.1 Hz, 1H), 3.07 (dq, J = 15.1, 7.5, 2.5 Hz, 1H), 2.14 (dq, J = 14.9, 7.3 Hz, 1H), 1.31 (d, J = 7.1 Hz, 3H), 1.13 (t, J = 7.3, 3.9 Hz, 3H); <sup>13</sup>C NMR (101 MHz, CDCl<sub>3</sub>) δ 170.1, 140.8, 136.6, 129.7, 128.8, 128.6, 128.4, 127.5, 122.9 (q, J = 288 Hz), 94.9 (q, J = 24 Hz), 53.3, 40.0, 22.9, 14.0, 8.5; <sup>19</sup>F NMR (565 MHz, CDCl<sub>3</sub>) δ - 67.2; FTIR (cm<sup>-1</sup>): 2986, 1665, 1562, 1495, 1408, 1202, 1120, 824, 701. HRMS (ESI) (M+H)<sup>+</sup> m/z calculated for [C<sub>20</sub>H<sub>22</sub>N<sub>2</sub>O<sub>3</sub>F<sub>3</sub>]<sup>+</sup>: 395.1504; found: 395.1568.

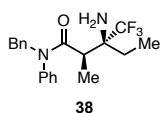

**(38)** α-Trifluoromethylnitroalkane **35** (190 mg, 0.48 mmol, 88% ee), ethyl acetate (15 mL), ethanol (19 mL), and HCl (6 M, 17.3 mmol, 2.9 mL) were added to a 100 mL round bottom flask equipped with a magnetic stir bar. The flask was cooled to 0 °C and Zn dust (1.57g, 24.0 mmol) was added in 3 portions over 10 minutes. The mixture was warmed to room temperature and stirred for 1 h. The resulting mixture was quenched with 1.0 M aqueous NaOH (50 mL) and extracted with ethyl acetate (50mL, 1x). The aqueous layer contains insoluble zinc salts was filtered through Celite and back extracted with ethyl acetate (30mL, 3x). The combined organic layer was dried over magnesium sulfate and concentrated *in vacuo* onto Celite. The crude reaction was purified by flash silica gel chromatography (90:10 → 80:20 hexanes : ethyl acetate) to afford **38** (88% ee, 142mg, 81% yield) as a clear oil. The enantiomeric excess was determined to be 88% by chiral HPLC analysis (CHIRALPAK IA, 1.0 mL/min, 5.0% *i*-PrOH/hexane, λ=220 nm); t<sub>R</sub>(major) = 17.099 min, t<sub>R</sub>(minor) = 20.364 min. [α]<sub>D</sub><sup>24</sup> = -75.3° (c = 1.00, CHCl<sub>3</sub>); <sup>1</sup>H NMR (600 MHz, CDCl<sub>3</sub>): δ 7.34 – 7.28 (m, 3H), 7.26 – 7.21 (m, 3H), 7.19 – 7.13 (m, 2H), 6.96 (s, 2H), 4.86 (q, J = 14.2 Hz, 2H), 2.62 (q, J = 6.9 Hz, 1H), 2.24 (s, 2H), 1.66 (dq, J = 15.2, 7.6 Hz, 1H), 1.49 – 1.37 (m, 1H), 1.17 (d, J = 6.9 Hz, 3H), 0.66 (t, J = 7.9, 1.8 Hz, 3H); <sup>13</sup>C NMR (101 MHz, CDCl<sub>3</sub>) δ 174.4, 141.5, 137.1, 129.4, 128.9, 128.3, 128.2, 128.0 (q, J = 288 Hz), 127.3, 60.5 (q, J = 24.1 Hz), 52.8, 35.4, 27.4, 12.9, 7.5; <sup>19</sup>F NMR (565 MHz, CDCl<sub>3</sub>) δ - 74.5; FTIR (cm<sup>-1</sup>): 3403, 2974, 1656, 1593, 1495, 1403, 1143, 915, 701; mp = 55-57 °C. HRMS (ESI) (M+H)<sup>+</sup> m/z calculated for [C<sub>20</sub>H<sub>24</sub>N<sub>2</sub>O<sub>3</sub>F<sub>3</sub>]<sup>+</sup>: 365.1835; found: 365.1827.

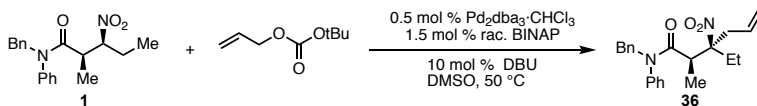

**(36)** **36** was synthesized by modification of a previously published procedure.<sup>22</sup> A hot 10 mL round bottom flask equipped with a magnetic stir bar and a rubber septum was attached via needle to a double manifold and cooled under vacuum. Once cooled, the flask was backfilled with N<sub>2</sub>, the septum was removed, and tris(dibenzylideneacetone)dipalladium(0)-chloroform adduct (3.4 mg, 3.3 μmol), (±)-BINAP (6.2 mg, 6.6 μmol), and **1** (215 mg, 0.66 mmol, 90% ee) were added. The septum was replaced, the flask was reattached to a double manifold and evacuated and backfilled with N<sub>2</sub> three times. Anhydrous DMSO (0.66 mL) was added via syringe and the reaction was stirred at rt for 5 minutes. DBU (10 μL, 66 μmol), and tert-butyl allyl carbonate (144 μL, 0.79 mmol) were added via syringe. The resulting brown solution was stirred in an oil bath at 50 °C for 48 h. Once complete, the reaction was cooled to rt, opened to air, diluted with ethyl acetate (40 mL) and it was filtered through celite. The filtrate was washed with water (20 mL, 3x). The organic layer was dried over magnesium sulfate and concentrated *in vacuo* onto Celite. The crude reaction was purified by flash silica gel chromatography (95:05 hexanes : ethyl acetate) to afford **36** (90% ee, 178 mg, 74% yield) as a clear oil. The enantiomeric excess was determined to be 90% by chiral HPLC analysis (CHIRALPAK IE, 1.0 mL/min, 3.0% *i*-PrOH/hexane, λ=254 nm); t<sub>R</sub>(major) = 38.353 min, t<sub>R</sub>(minor) = 29.727 min. [α]<sub>D</sub><sup>24</sup> = -46.4° (c = 1.00, CHCl<sub>3</sub>); <sup>1</sup>H NMR (600 MHz, CDCl<sub>3</sub>): δ 7.36 – 7.29 (m, 3H), 7.29 – 7.21 (m, 3H), 7.20 – 7.14 (m, 2H), 7.01 – 6.94 (m, 2H), 5.54 (ddt, *J* = 17.1, 10.1, 7.0 Hz, 1H), 5.09 (dd, *J* = 17.2, 1.9 Hz, 1H), 5.02 (d, 1H), 4.86 (q, 2H), 3.04 (q, *J* = 7.0 Hz, 1H), 2.91 (dd, *J* = 15.2, 6.7 Hz, 1H), 2.72 (dd, *J* = 15.2, 7.4 Hz, 1H), 2.35 (dq, *J* = 14.9, 7.5 Hz, 1H), 1.96 (dq, *J* = 14.7, 7.4 Hz, 1H), 1.18 (d, *J* = 7.0 Hz, 3H), 0.86 (t, *J* = 7.4 Hz, 3H); <sup>13</sup>C NMR (101 MHz, CDCl<sub>3</sub>) δ 172.2, 141.5, 137.1, 131.9, 129.6, 128.9, 128.4, 128.4, 128.3, 127.4, 95.5, 53.1, 41.8, 37.5, 27.7, 14.2, 8.4; FTIR (cm<sup>-1</sup>): 3063, 2979, 1658, 1594, 1494, 1403, 1245, 924, 702. HRMS (ESI) (M+H)<sup>+</sup> *m/z* calculated for [C<sub>22</sub>H<sub>27</sub>N<sub>2</sub>O<sub>3</sub>]<sup>+</sup>: 367.2016; found: 367.2005.

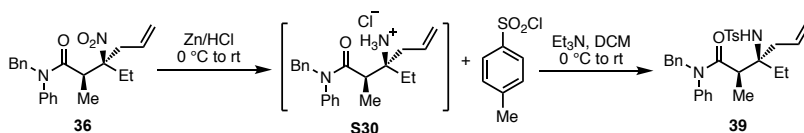

**(S30)** **36** (350 mg, 0.96 mmol, 90% ee), ethyl acetate (29 mL), ethanol (38 mL), and HCl (6 M, 34.4 mmol, 5.7 mL) were added to a 200 mL round bottom flask equipped with a magnetic stir bar. The flask was cooled to 0 °C and Zn dust (3.125 g, 47.8 mmol) was added in 3 portions over 10 minutes. The mixture was warmed to room temperature and stirred for 1 h. The resulting mixture was quenched with brine (100 mL) and extracted with ethyl acetate (80 mL, 1x). The aqueous layer contains insoluble zinc salts was filtered through celite and back extracted with ethyl acetate (50 mL, 3x). The combined organic layer was dried over magnesium sulfate and concentrated *in vacuo* to afford crude (336 mg) as a white solid. The crude material was taken to the next step without further purification.

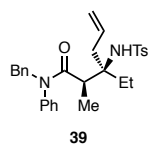

**(39)** A hot 10 mL round bottom flask equipped with a magnetic stir bar and rubber septum was attached via needle to a double manifold and cooled under vacuum. The flask was backfilled with N<sub>2</sub>, the septum was removed, and the **S30** (120 mg, 0.32 mmol), *p*-toluene sulfonyl chloride (68 mg, 0.35 mmol), and 4-(dimethylamino) pyridine (8 mg, 0.064 mmol), was added sequentially. The septum was replaced, the flask was attached to a double manifold, and evacuated and backfilled with N<sub>2</sub> three times. Anhydrous dichloromethane (1.6 mL), and triethylamine (90 μL, 0.64 mmol), were added to the flask sequentially via syringe and the reaction stirred at rt for 8 h. The septum was removed and the reaction was diluted with dichloromethane (10.0 mL) and washed with water (10 mL, 2x). The aqueous layer was back extracted with dichloromethane (10 mL, 1x). The organic layers were combined, dried over magnesium sulfate, and concentrated *in vacuo*. The crude reaction was purified by flash silica gel chromatography (90:10 hexanes : ethyl acetate) to afford **39** (96% ee, 133 mg, 85% yield) as a white solid. The enantiomeric excess was determined to be 96% by chiral HPLC analysis (CHIRALPAK IB, 1.0 mL/min, 3.0% *i*-PrOH/hexane, λ=210 nm); t<sub>R</sub>(major) = 25.128 min, t<sub>R</sub>(minor) = 23.737 min. [α]<sub>D</sub><sup>24</sup> = -11.8° (c = 1.00, CHCl<sub>3</sub>); <sup>1</sup>H NMR (400 MHz, CDCl<sub>3</sub>): δ 7.76 (d, 2H), 7.51 (s, 1H), 7.37 – 7.31 (m, 4H), 7.29 – 7.26 (m, 2H), 7.24 – 7.20 (m, 2H), 7.16 (dd, *J* = 6.7, 2.9 Hz, 2H), 6.99 – 6.88 (m, 2H), 5.97

– 5.82 (m, 1H), 5.08 – 4.98 (m, 2H), 4.92 (d,  $J = 14.1$  Hz, 1H), 4.75 (d,  $J = 14.0$  Hz, 1H), 2.39 (s, 3H), 2.38 – 2.26 (m, 2H), 2.20 (dd,  $J = 14.3, 7.8$  Hz, 1H), 1.94 (dq,  $J = 15.0, 7.5$  Hz, 1H), 1.51 – 1.38 (m, 1H), 0.89 (d,  $J = 6.9$  Hz, 3H), 0.31 (t,  $J = 7.5$  Hz, 3H);  $^{13}\text{C}$  NMR (101 MHz,  $\text{CDCl}_3$ )  $\delta$  175.9, 142.2, 141.5, 141.2, 136.8, 133.7, 129.7, 129.2, 129.0, 128.5, 128.1, 127.6, 127.0, 117.8, 64.0, 52.8, 42.7, 39.8, 29.5, 23.6, 21.5, 13.2, 7.1; FTIR ( $\text{cm}^{-1}$ ): 3220, 2975, 1635, 1594, 1495, 1404, 1340, 1149, 702; mp = 120–122 °C. HRMS (ESI) ( $\text{M}+\text{H}$ ) $^+$   $m/z$  calculated for  $[\text{C}_{29}\text{H}_{35}\text{N}_2\text{O}_3\text{S}]^+$ : 491.2290; found: 491.2342. Crystals for X-ray analysis were obtained by slow evaporation of diethyl ether.

## 12. Mechanistic Studies:

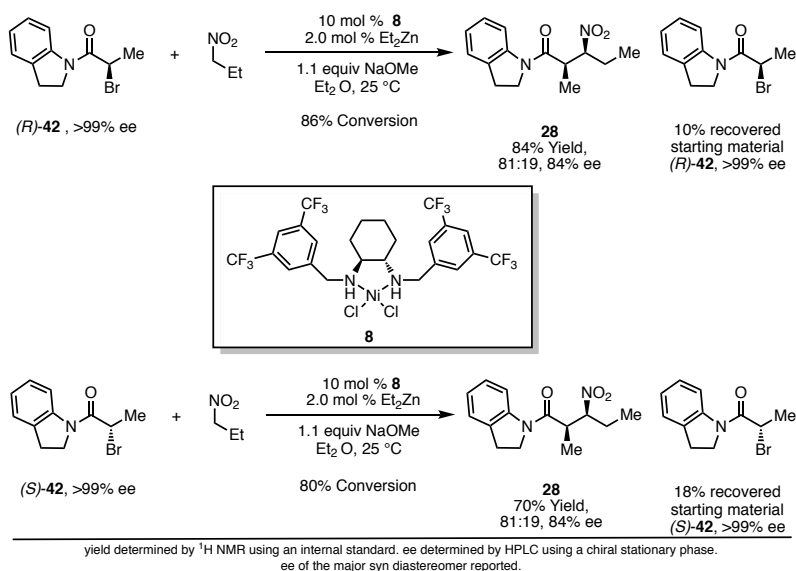

### Reaction beginning with (R)-42:

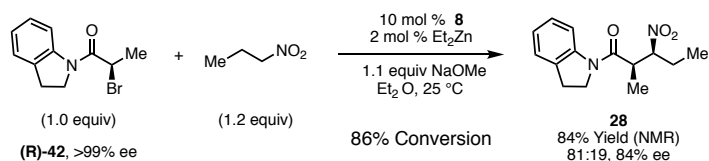

According to general protocol E: **8** (17.3 mg, 0.025 mmol), (R)-2-bromo-1-(indolin-1-yl) propan-1-one (**42**, 64 mg, 0.25 mmol), 1-nitropropane (28  $\mu\text{L}$ , 0.3 mmol), sodium methoxide (14.9 mg, 0.275 mmol), diethyl zinc (1 M in hexane, 0.005 mmol, 5  $\mu\text{L}$ ) and anhydrous  $\text{Et}_2\text{O}$  (2.5 mL) were combined under  $\text{N}_2$  and stirred rapidly at rt. After 30 min, the reaction was removed from the glovebox and quenched by opening the reaction to air. 1,3,5-trimethoxybenzene (10.5 mg, 0.0625 mmol) was added as an internal standard and the reaction was worked up according to the general protocol E.  $^1\text{H}$  NMR analysis of the crude reaction mixture revealed a diastereomeric ratio of 81:19 favoring of syn isomer and 86% conversion of starting material (**R**)-**42** and 84% yield of **28**. The chiral HPLC analysis of starting material (**R**)-**42** showed ee of 99% and a product **28** ee of 84%. (CHIRALPAK IA, 1.0 mL/min, 1.0% *i*-PrOH/hexane,  $\lambda=254$  nm; starting material (**R**)-**42**:  $t_{\text{R}}$ (major) = 26.099 min,  $t_{\text{R}}$ (minor) = 32.910 min; product **28**:  $t_{\text{R}}$ (major) = 16.738 min,  $t_{\text{R}}$ (minor) = 20.710 min).

## Reaction beginning with (S)-42

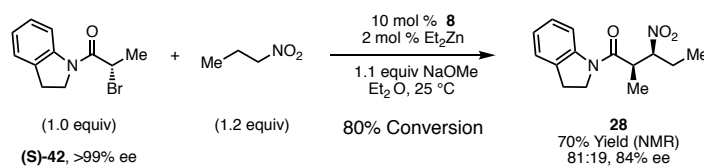

According to general protocol E: **8** (17.3 mg, 0.025 mmol), (S)-2-bromo-1-(indolin-1-yl) propan-1-one (**42**, 64 mg, 0.25 mmol), 1-nitropropane (28  $\mu\text{L}$ , 0.3 mmol), sodium methoxide (14.9 mg, 0.275 mmol), diethyl zinc (1 M in hexane, 0.005 mmol, 5  $\mu\text{L}$ ) and anhydrous  $\text{Et}_2\text{O}$  (2.5 mL) were combined under  $\text{N}_2$  and stirred rapidly at rt. After 30 min, the reaction was removed from the glovebox and quenched by opening the reaction to air. 1,3,5-trimethoxybenzene (10.5 mg, 0.0625 mmol) was added as an internal standard and the reaction was worked up according to the general protocol E.  $^1\text{H}$  NMR analysis of the crude reaction mixture revealed a diastereomeric ratio of 81:19 favoring of syn isomer and 80% conversion of starting material (**S**)-**42** and 70% yield of **28**. The chiral HPLC analysis of starting material (**S**)-**42** showed ee of 99% and a product **28** ee of 84%. (CHIRALPAK IA, 1.0 mL/min, 1.0% *i*-PrOH/hexane,  $\lambda=254$  nm; starting material (**S**)-**42**:  $t_{\text{R}}$ (major) = 32.910 min,  $t_{\text{R}}$ (minor) = 26.099 min; product **28**:  $t_{\text{R}}$ (major) = 16.509 min,  $t_{\text{R}}$ (minor) = 20.422 min).

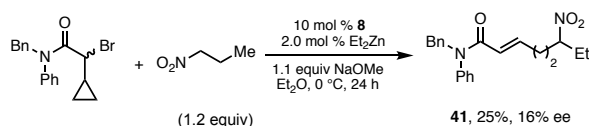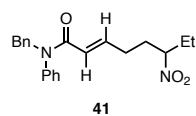

(**41**) According to general protocol E: **8** (69.4 mg, 0.1 mmol), N-benzyl-2-bromo-2-cyclopropyl-N-phenylpropionamide (**40**, 222 mg, 1.0 mmol), 1-nitropropane (108  $\mu\text{L}$ , 1.2 mmol), sodium methoxide (59.4 mg, 1.1 mmol), diethyl zinc (1 M in hexane, 0.02 mmol, 20  $\mu\text{L}$ ) and anhydrous  $\text{Et}_2\text{O}$  (10.0 mL) were combined under  $\text{N}_2$  and stirred rapidly at rt for 24 h. The reaction was worked up according to the general protocol. The crude reaction was purified by flash silica gel chromatography (75:25:01 hexanes : ethyl acetate : acetic acid) to afford **41** (16% ee, 87 mg, 25% yield) as a clear oil. The enantiomeric excess was determined to be 16% by chiral HPLC analysis (CHIRALPAK IA, 1.0 mL/min, 5.0% *i*-PrOH/hexane,  $\lambda=220$  nm);  $t_{\text{R}}$ (major) = 22.898 min,  $t_{\text{R}}$ (minor) = 25.021 min.  $[\alpha]_{\text{D}}^{24} = +5.9^\circ$  ( $c = 1.00$ ,  $\text{CHCl}_3$ );  $^1\text{H}$  NMR (400 MHz,  $\text{CDCl}_3$ ):  $\delta$  7.38 – 7.29 (m, 3H), 7.29 – 7.18 (m, 5H), 7.03 – 6.96 (m, 2H), 6.85 (dt,  $J = 15.1, 6.9$  Hz, 1H), 5.72 (d,  $J = 15.2$  Hz, 1H), 4.96 (s, 2H), 4.32 (tt,  $J = 9.1, 4.3$  Hz, 1H), 2.06 (dtdd,  $J = 20.8, 14.5, 9.6, 7.7$  Hz, 3H), 1.91 (ddt,  $J = 14.6, 9.3, 7.3$  Hz, 1H), 1.80 – 1.64 (m, 2H), 0.91 (t,  $J = 7.4$  Hz, 3H);  $^{13}\text{C}$  NMR (101 MHz,  $\text{CDCl}_3$ )  $\delta$  165.4, 142.9, 141.7, 137.3, 129.4, 128.6, 128.3, 128.3, 127.8, 127.3, 123.3, 89.2, 53.1, 31.8, 28.4, 27.2, 10.1; FTIR ( $\text{cm}^{-1}$ ): 3060, 1665, 1594, 1495, 1410, 1242, 958, 700. HRMS (ESI) ( $\text{M}+\text{H}$ ) $^+$   $m/z$  calculated for  $[\text{C}_{21}\text{H}_{25}\text{N}_2\text{O}_3]^+$ : 353.1787; found: 353.1844.



## Non-Linear Studies

To probe the possible catalyst aggregation in the nickel-catalyzed enantioselective C-alkylation reaction, we investigated the dependence of product enantiomeric excess on catalyst ee. To perform this study we prepared ligand (S,S)-7, and mixed with ligand (R,R)-7 to afford 75%, 50%, 25% and 0% ee of the catalyst. As outlined in Table S8, a linear correlation was observed by plotting the ee of syn-isomer of **31** (Chart S1) against the ee of the catalyst **7** and similar linearity was observed for the anti-isomer **31** (Chart S2) This linear relationship between enantiomeric excess and catalyst ee reveals that the active catalyst is likely a monomeric species.

Table S8: Study of Product ee and Catalyst ee

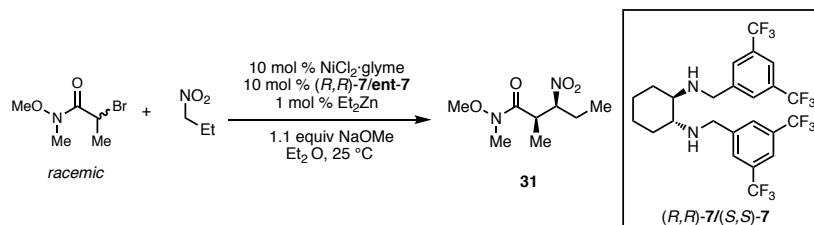

| Entry | % ee of the ligand <b>7</b> | % Yield <b>31</b> <sup>a</sup> | d.r<br><i>syn/anti</i> | % ee<br><i>syn/anti</i> <sup>b</sup><br><b>31</b> |
|-------|-----------------------------|--------------------------------|------------------------|---------------------------------------------------|
| 1     | 100                         | 77                             | 88:12                  | 85/42                                             |
| 2     | 75                          | 70                             | 89:11                  | 64/33                                             |
| 3     | 50                          | 70                             | 91:09                  | 46/20                                             |
| 4     | 25                          | 71                             | 90:10                  | 26/10                                             |
| 5     | 0                           | 71                             | 90:10                  | 0/0                                               |

<sup>a</sup>Yield determined by <sup>1</sup>H NMR using 1,3,5-trimethoxybenzene as an internal standard

<sup>b</sup>Determined by chiral HPLC analysis

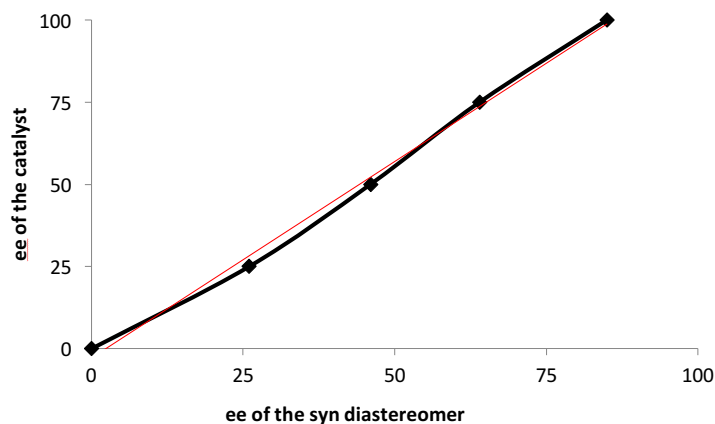

Chart S1: Plot of enantiomeric excess of the catalyst **7** Vs enantiomeric excess of the *syn* diastereomer **31**

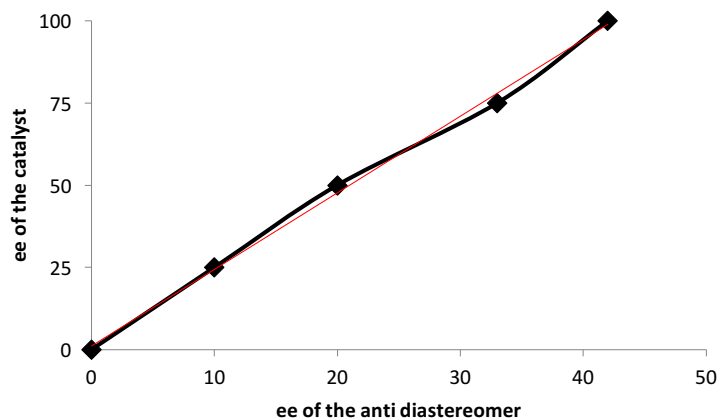

Chart S2: Plot of enantiomeric excess of the catalyst **7** Vs enantiomeric excess of the *anti* diastereomer **31**

### Initial Studies Using DBU as the Base

Under our unoptimized conditions, using DBU as the base we found enantioselectivity and diastereoselectivity of the desired product **S31** was not reproducible as shown in Table S9. This suggests that the product **S31** was not stable under the reaction conditions.

Table S9: Inconsistent Results Using DBU as the Base

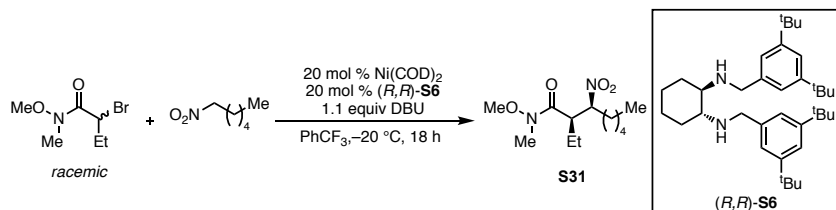

| Entry | Run | % Yield <b>S31</b> <sup>a</sup> | d.r<br><i>syn/anti</i> | % ee<br><i>syn/anti</i> <sup>b</sup><br><b>S31</b> |
|-------|-----|---------------------------------|------------------------|----------------------------------------------------|
| 1     | A   | 62                              | 74:26                  | 77/40                                              |
| 2     | B   | 64                              | 63:36                  | 62/58                                              |
| 3     | C   | 65                              | 74:26                  | 81/32                                              |
| 4     | D   | 69                              | 80:20                  | 80/42                                              |

<sup>a</sup>Yield determined by <sup>1</sup>H NMR using 1,3,5-trimethoxybenzene as an internal standard

<sup>b</sup>Determined by chiral HPLC analysis

We performed the following experiment to study the kinetic stability of *syn* and *anti* diastereomers of **S31**. On subjecting racemic, *syn* diastereomer of **S31** into the nickel-catalyzed enantioselective reaction, the *syn* diastereomer was epimerized to mixture of diastereomers (*syn:anti* 61:39, Figure 1, top) and similar results were obtained on subjecting racemic, *anti* diastereomer **S31** to the reaction conditions (Figure 1, bottom).

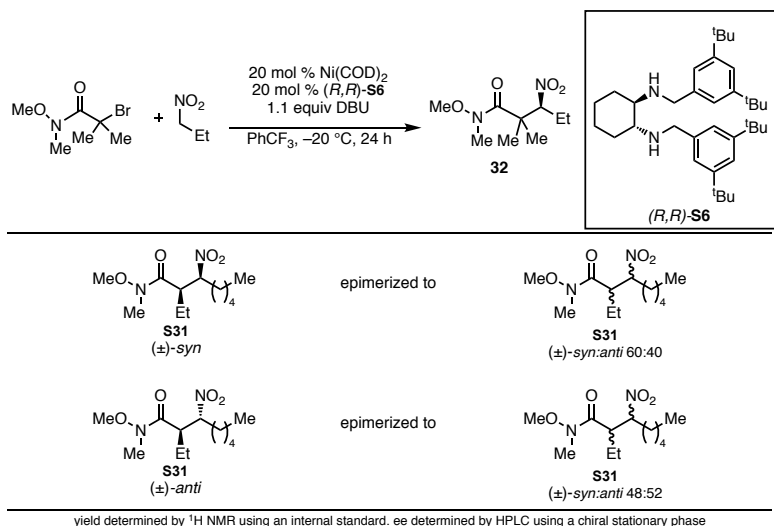

Figure 1: Studies on Diastereomer Stability.

Based on our previous studies between DBU and nitroalkanes using <sup>1</sup>H NMR spectroscopy, the deprotonation event is slow, taking about 10 minutes for a 2:1 mixture of nitroalkane and nitronate anion to reach equilibrium at -25 °C.<sup>23</sup> Hence, there would be a significant concentration of soluble DBU and soluble nitronate anion under the homogeneous reaction conditions. Presumably, the soluble DBU deprotonates the formed **S31** slowly, consequently the product loses its configurational integrity (Figure 2, top).

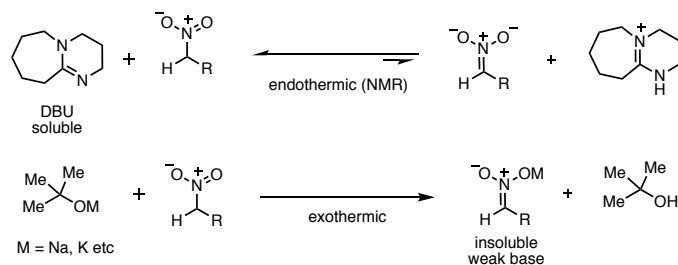

Figure 2: Rationalization for Epimerization of **S31** and Proposed Solution

**Investigation of Metal alkoxide Bases:** To avoid this epimerization issue, we utilized a much stronger base than DBU, such as metal alkoxides. As shown in Table S10, potassium tert-butoxide found to be superior. Significantly the ee's were reproducible and this suggests that the enantioenriched product **S31** does not epimerize under this heterogeneous reaction conditions. Our mechanistic working hypothesis is, presumably KO<sup>t</sup>Bu would quantitatively deprotonates the nitroalkane generating weakly basic metal nitronate anions which are sparingly soluble in the non-polar reaction media (Figure 2, bottom). Importantly, the heterogeneous reaction media might prevent the formed enantioenriched product (it would be in solution phase) from epimerization as the weakly basic metal nitronate anion would be in the solid phase.

Table S10: Investigation of Metal Alkoxide Bases

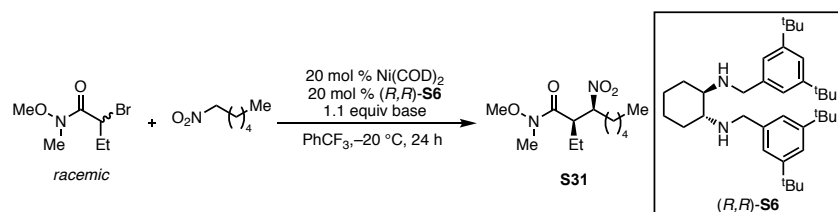

| Entry | Base                               | % Yield S31 <sup>a</sup> | d.r syn/anti | % ee syn/anti <sup>b</sup> S31 |
|-------|------------------------------------|--------------------------|--------------|--------------------------------|
| 1     | LiO <sup>t</sup> Bu                | 17                       | 71:29        | 00/00                          |
| 2     | Mg(O <sup>t</sup> Bu) <sub>2</sub> | 09                       | 78:28        | 81/36                          |
| 3     | NaO <sup>t</sup> Bu                | 31                       | 77:23        | 49/28                          |
| 4     | KO <sup>t</sup> Bu                 | 51                       | 75:25        | 58/32                          |

<sup>a</sup>Yield determined by <sup>1</sup>H NMR using 1,3,5-trimethoxybenzene as an internal standard

<sup>b</sup>Determined by chiral HPLC analysis

### 13. Assignment of Absolute Stereochemistry of β-nitroamides

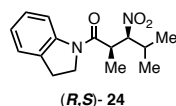

The relative and absolute stereochemistry of **24** (major diastereomer) was determined by X-ray crystallographic analysis. This compound was prepared using general procedure F from **S21** and 2-methyl-1-nitropropane with **8** as catalyst.

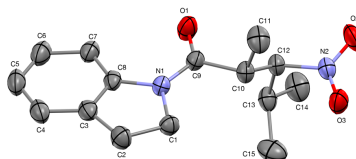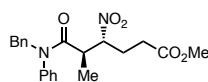

The relative and absolute stereochemistry of **15** (minor diastereomer) was determined by X-ray crystallographic analysis. This compound was prepared using general procedure E from N-benzyl-2-bromo-N-phenylpropionamide and methyl-4-nitrobutanoate with **8** as catalyst.

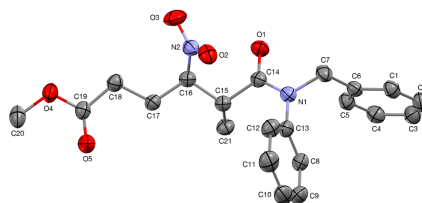

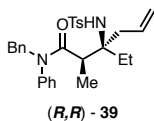

The relative and absolute stereochemistry of **39** was determined by X-ray crystallographic analysis. This compound was prepared by reducing **36** followed by tosylation.

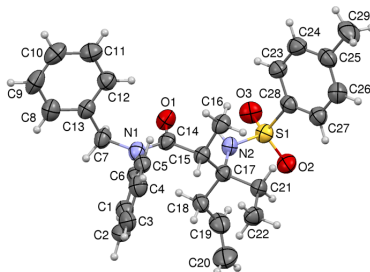

#### 14. X-ray Structural Solution and Refinement:

Crystals were mounted using viscous oil onto a plastic mesh and cooled to the data collection temperature. Data were collected on a Bruker-AXS APEX II DUO CCD diffractometer with graphite-monochromated Mo-K $\alpha$  radiation ( $\lambda=0.71073$  Å) for **59** and Cu-K $\alpha$  radiation ( $\lambda = 1.54178$  Å) focused with Goebel mirrors for **15**, **24** and **39**. Unit cell parameters were obtained from 36 data frames,  $0.5^\circ \omega$ , from three different sections of the Ewald sphere. The unit cell parameters, and systematic absences in the diffraction data are consistent with P21 (4) and P21/m (11) for **59**; and, uniquely, for P212121 for **63**, **71** and **73**. The non-centrosymmetric space groups are consistent with the chiral compound molecules and they yielded chemically reasonable and computationally stable results of refinement. Refinement of the absolute structure parameters to nil indicates the true hands of the data have been determined. The data were treated with multi-scan absorption corrections.<sup>24</sup> The structures were solved using intrinsic phasing methods and refined with full-matrix, least-squares procedures on F<sup>2</sup>.

Compound **8** consistently packs inefficiently leading to multiple crystal growth, high mosaicity and disorder at the CF<sub>3</sub> groups. The results herein represent the best of several trials. Two symmetry unique but chemically identical compound molecules and seven cocrystallized toluene solvent molecules were found in the asymmetric unit of **8**. In order to converge the chemically reasonable model, the CF<sub>3</sub> groups and toluene solvent molecules were treated as idealized rigid groups and three-dimensional rigid bond restraints were required.

All non-hydrogen atoms were refined with anisotropic displacement parameters. Hydrogen atoms were treated as idealized contributions with geometrically calculated positions and with U<sub>iso</sub> equal to 1.2 (or 1.5 for methyl) U<sub>eq</sub> of the attached atom. Atomic scattering factors are contained in the SHELXTL program library.<sup>25</sup>

## 16. References:

1. Pangborn, A. B.; Giardello, M. A.; Grubbs, R. H.; Rosen, R. K.; Timmers, F. J., Safe and Convenient Procedure for Solvent Purification. *Organometallics* **1996**, *15*, 1518-1520.
2. Budzelaar, Peter H. M.; Moonen, Nicolle N. P.; Gelder, René d.; Smits, Jan M. M.; Gal, Anton W., Rhodium and Iridium  $\beta$ -Diiminate Complexes – Olefin Hydrogenation Step by Step. *European Journal of Inorganic Chemistry* **2000**, *2000*, 753-769.
3. Skiles, J. W.; Fuchs, V.; Miao, C.; Sorcek, R.; Grozinger, K. G.; Mauldin, S. C.; Vitous, J.; Mui, P. W.; Jacober, S., Inhibition of human leukocyte elastase (HLE) by N-substituted peptidyl trifluoromethyl ketones. *J. Med. Chem.* **1992**, *35*, 641-662.
4. Marsh, G. P.; Parsons, P. J.; McCarthy, C.; Corniquet, X. G., An Efficient Synthesis of Nitroalkenes by Alkene Cross Metathesis: Facile Access to Small Ring Systems. *Org. Lett.* **2007**, *9*, 2613-2616.
5. Cho, S.-D.; Chung, J.-W.; Choi, W.-Y.; Kim, S.-K.; Yoon, Y.-J., Synthesis of novel pyridazine acyclonucleosides. *J. Heterocycl. Chem.* **1994**, *31*, 1199-1208.
6. Ballini, R.; Barboni, L.; Giarlo, G., The First Conversion of Primary Alkyl Halides to Nitroalkanes under Aqueous Medium. *J. Org. Chem.* **2004**, *69*, 6907-6908.
7. Bobál, P.; Lightner, D. A., An improved coupling procedure for the barton-zard pyrrole synthesis. *J. Heterocycl. Chem.* **2001**, *38*, 527-530.
8. Wahlström, N.; Stensland, B.; Bergman, J., Synthesis of the marine alkaloid caulersin. *Tetrahedron* **2004**, *60*, 2147-2153.
9. Motokura, K.; Fujita, N.; Mori, K.; Mizugaki, T.; Ebitani, K.; Kaneda, K., An Acidic Layered Clay Is Combined with A Basic Layered Clay for One-Pot Sequential Reactions. *J. Am. Chem. Soc.* **2005**, *127*, 9674-9675.
10. Gildner, P. G.; Gietter, A. A. S.; Cui, D.; Watson, D. A., Benzylolation of Nitroalkanes Using Copper-Catalyzed Thermal Redox Catalysis: Toward the Facile C-Alkylation of Nitroalkanes. *J. Am. Chem. Soc.* **2012**, *134*, 9942-9945.
11. Sinhababu, A. K.; Borchardt, R. T., Silica gel-assisted reduction of nitrostyrenes to 2-aryl-1-nitroalkanes with sodium borohydride. *Tetrahedron Lett.* **1983**, *24*, 227-230.
12. Bhattacharjya, A.; Mukhopadhyay, R.; Pakrashi, S. C., Sodium Borohydride Reduction of Nitrostyrenes by Reverse Addition: A Simple and Efficient Method for the Large-Scale Preparation of Phenylnitroethanes. *Synthesis* **1985**, *1985*, 886-887.
13. McNulty, J.; Steere, J. A.; Wolf, S., The ultrasound promoted Knoevenagel condensation of aromatic aldehydes. *Tetrahedron Lett.* **1998**, *39*, 8013-8016.
14. Ballini, R.; Bosica, G., Conjugated Addition Reactions of Nitroalkanes with Electrophilic Alkenes in Aqueous Media. *Eur. J. Org. Chem.* **1998**, *1998*, 355-357.
15. Gietter, A. A. S.; Gildner, P. G.; Cinderella, A. P.; Watson, D. A., General Route for Preparing  $\beta$ -Nitrocarbonyl Compounds Using Copper Thermal Redox Catalysis. *Org. Lett.* **2014**, *16*, 3166-3169.
16. Kraus, J. M.; Gits, H. C.; Silverman, R. B., High yielding allylation of a chiral secondary alcohol containing base sensitive functional groups. *Tetrahedron Lett.* **2012**, *53*, 1319-1322.
17. Donohoe, T. J.; Fishlock, L. P.; Basutto, J. A.; Bower, J. F.; Procopiou, P. A.; Thompson, A. L., Synthesis of substituted pyridines and pyridazines via ring closing metathesis. *Chem. Commun.* **2009**, 3008-3010.
18. Fischer, C.; Fu, G. C., Asymmetric Nickel-Catalyzed Negishi Cross-Couplings of Secondary  $\alpha$ -Bromo Amides with Organozinc Reagents. *J. Am. Chem. Soc.* **2005**, *127*, 4594-4595.
19. Patt, S. L.; Shoolery, J. N., Attached proton test for carbon-13 NMR. *J. Magn. Reson.* **1982**, *46*, 535-539.
20. Abdel-Magid, A. F.; Carson, K. G.; Harris, B. D.; Maryanoff, C. A.; Shah, R. D., Reductive Amination of Aldehydes and Ketones with Sodium Triacetoxyborohydride. Studies on Direct and Indirect Reductive Amination Procedures. *J. Org. Chem.* **1996**, *61*, 3849-3862.
21. Tye, H.; Eldred, C.; Wills, M., An efficient method for the synthesis of N,N'-dimethyl-1,2-diamines. *Tetrahedron Lett.* **2002**, *43*, 155-158.
22. Maki, K.; Kanai, M.; Shibasaki, M., Pd-Catalyzed allylic alkylation of secondary nitroalkanes. *Tetrahedron* **2007**, *63*, 4250-4257.
23. Gietter-Burch, A. A. S.; Devannah, V.; Watson, D. A., Trifluoromethylation of Secondary Nitroalkanes. *Org. Lett.* **2017**, *19*, 2957-2960.

24. Apex3 software suite; Bruker AXS, I., Madison, WI, 2015, Apex3 software suite; Bruker AXS, Inc., Madison, WI, 2015.
25. Sheldrick, G., Crystal structure refinement with SHELXL. *Acta Crystallogr. Sect. C* **2015**, *71*, 3-8.

| Parameter                | Value           |
|--------------------------|-----------------|
| 1 Title                  | DVR05078B.1.fid |
| 2 Solvent                | CDCI3           |
| 3 Temperature            | 298.2           |
| 4 Number of Scans        | 16              |
| 5 Receiver Gain          | 7               |
| 6 Relaxation Delay       | 1.0000          |
| 7 Pulse Width            | 15.0000         |
| 8 Spectrometer Frequency | 400.13          |
| 9 Nucleus                | <sup>1</sup> H  |

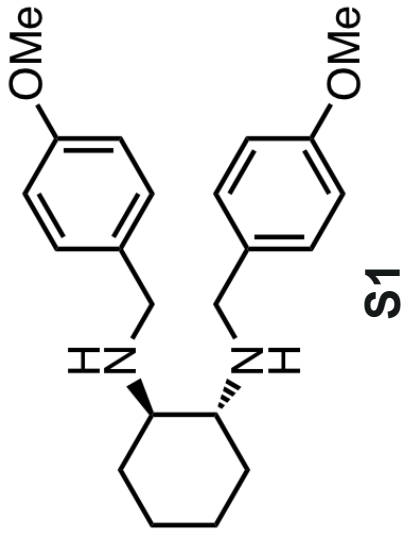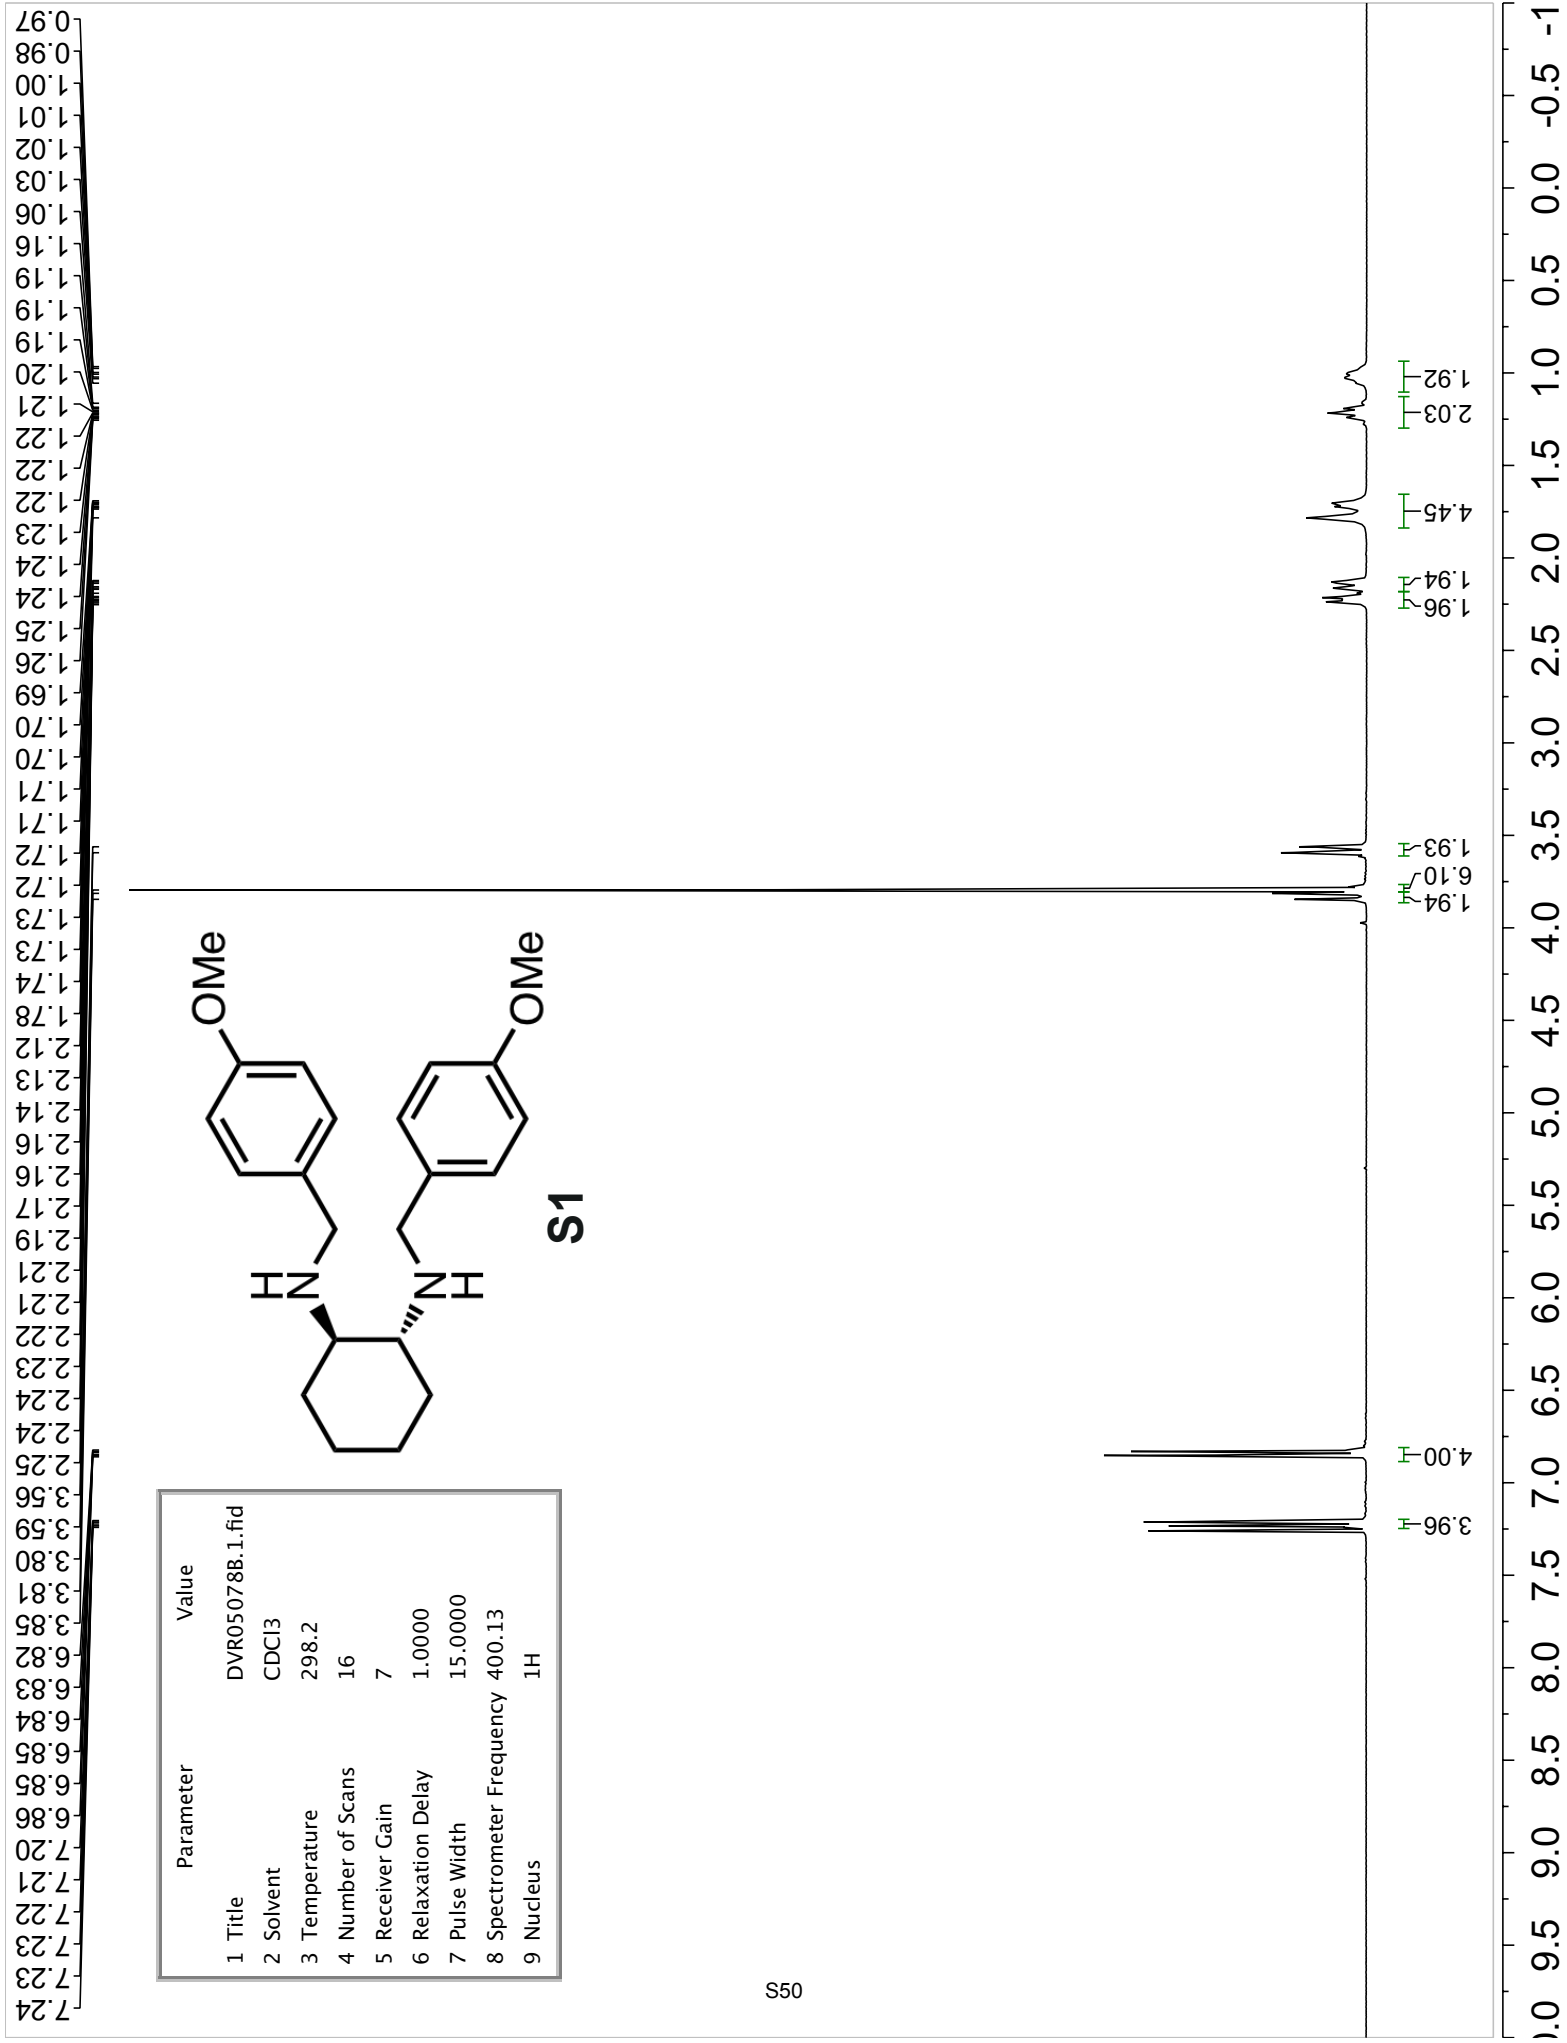



| Parameter                | Value               |
|--------------------------|---------------------|
| 1 Title                  | DVR05078B C13.1.fid |
| 2 Solvent                | CDCl3               |
| 3 Temperature            | 298.2               |
| 4 Number of Scans        | 1024                |
| 5 Receiver Gain          | 512                 |
| 6 Relaxation Delay       | 3.0000              |
| 7 Pulse Width            | 9.2500              |
| 8 Spectrometer Frequency | 100.62              |
| 9 Nucleus                | 13C                 |

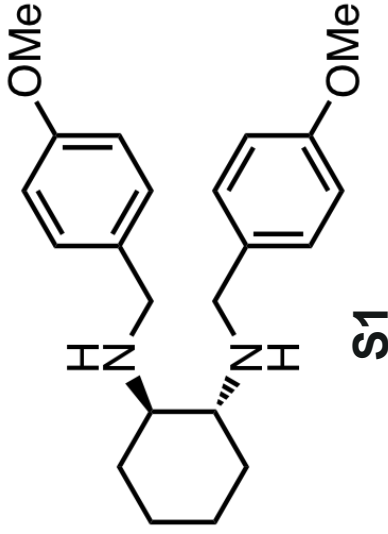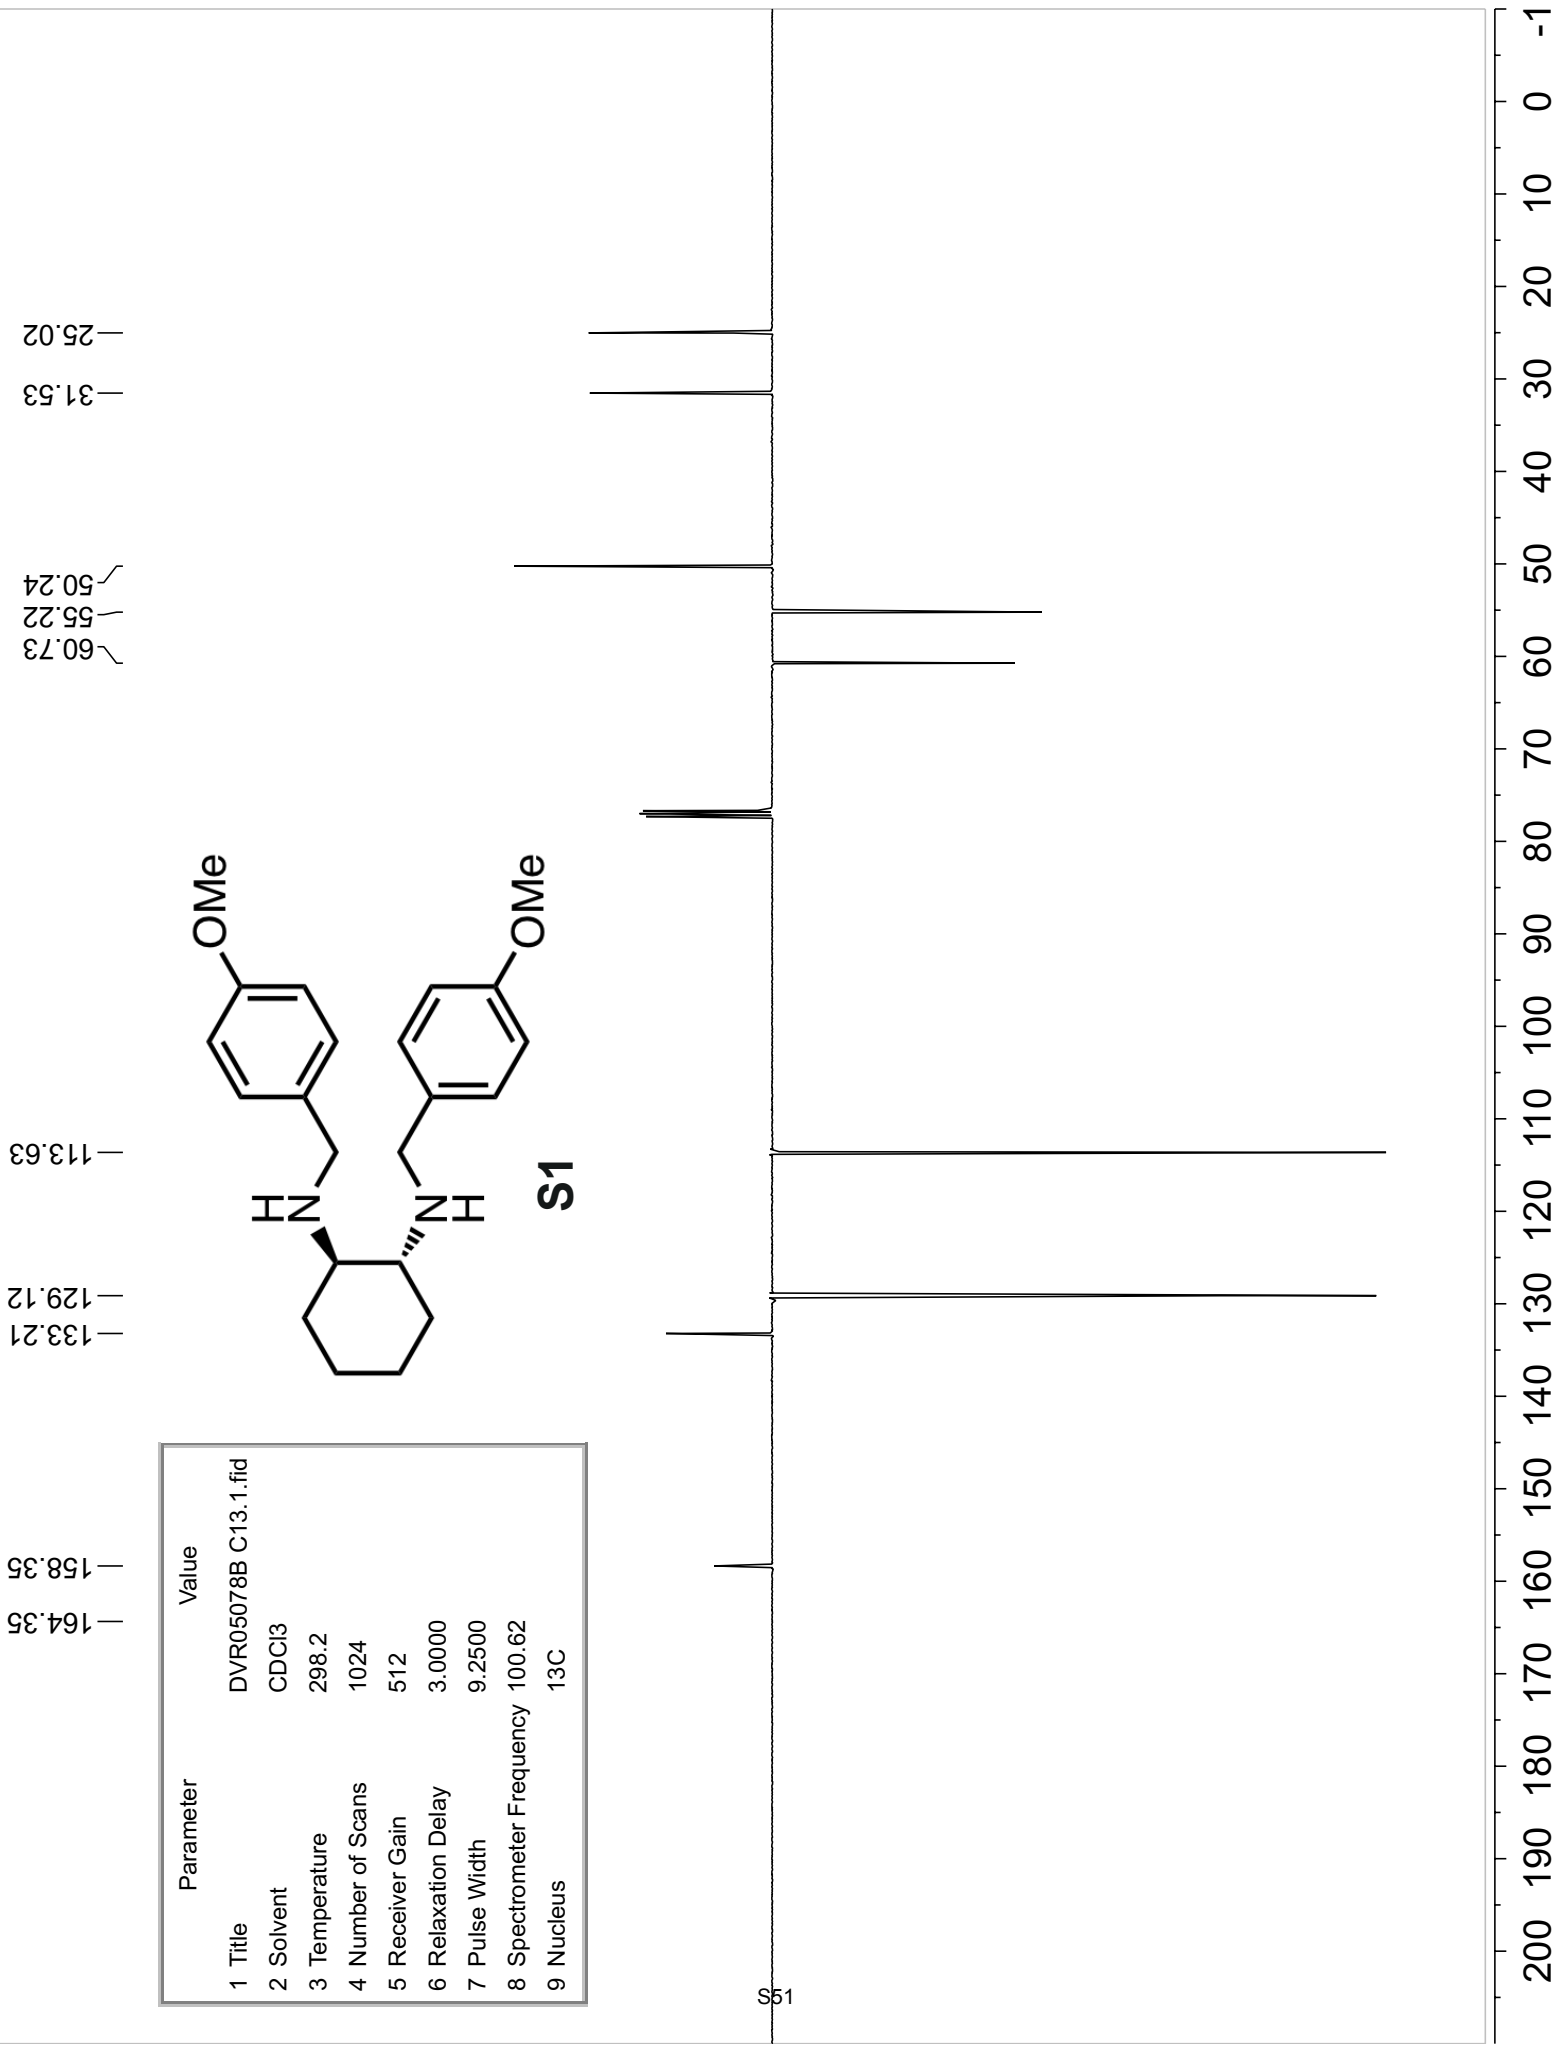

7.20  
7.19  
7.19  
7.17  
7.17  
7.16  
6.72  
6.71  
6.70  
6.69  
6.69  
6.68  
6.67  
3.84  
3.82  
3.80  
3.58  
3.55  
2.93  
2.29  
2.28  
2.28  
2.27  
2.18  
2.17  
2.17  
2.14  
2.14  
2.13  
2.12  
2.11  
2.10  
1.21  
1.19  
1.08  
1.05

| Parameter                | Value           |
|--------------------------|-----------------|
| 1 Title                  | DVR05078A.1.fid |
| 2 Solvent                | CDCl3           |
| 3 Temperature            | 298.2           |
| 4 Number of Scans        | 16              |
| 5 Receiver Gain          | 7               |
| 6 Relaxation Delay       | 1.0000          |
| 7 Pulse Width            | 15.0000         |
| 8 Spectrometer Frequency | 400.13          |
| 9 Nucleus                | 1H              |

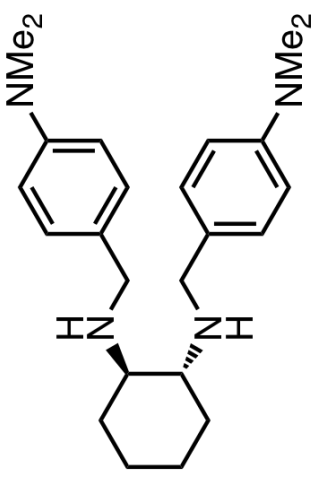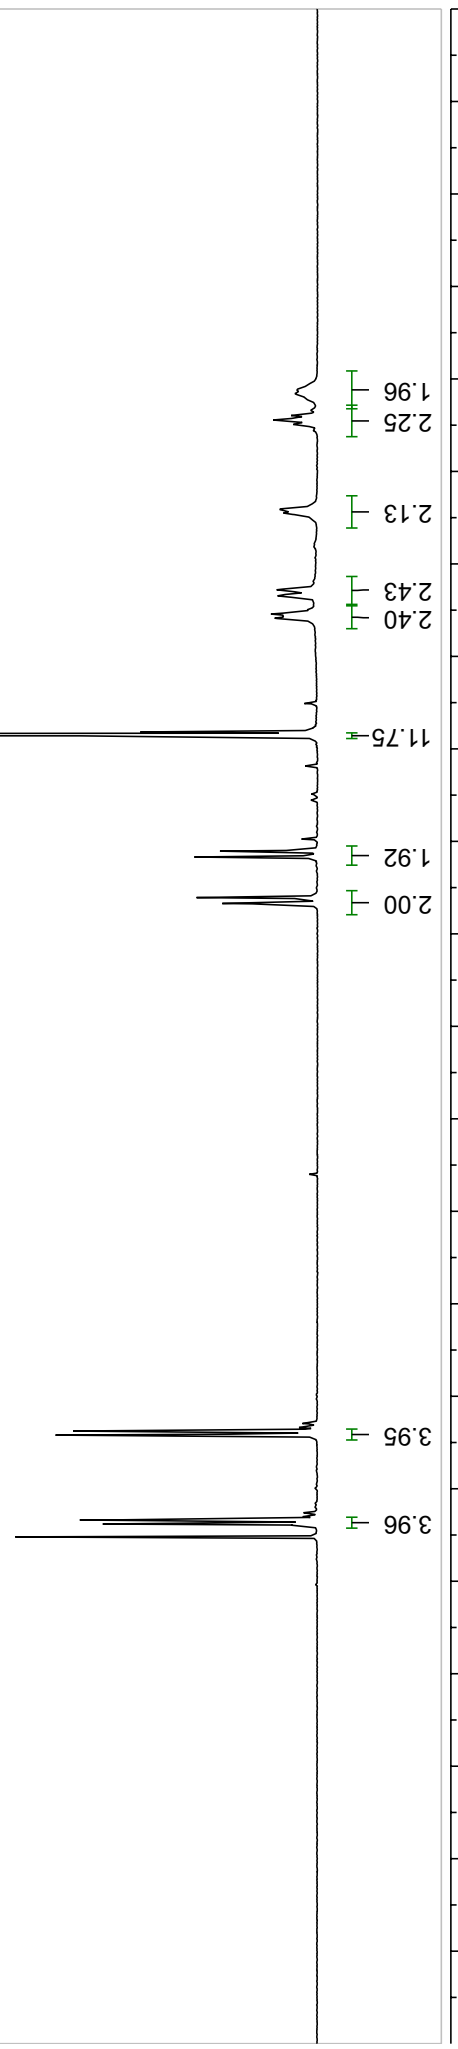

9.5 9.0 8.5 8.0 7.5 7.0 6.5 6.0 5.5 5.0 4.5 4.0 3.5 3.0 2.5 2.0 1.5 1.0 0.5 0.0 -0.5 -1

| Parameter                | Value               |
|--------------------------|---------------------|
| 1 Title                  | DVR05078A C13.1.fid |
| 2 Solvent                | CDCl3               |
| 3 Temperature            | 298.2               |
| 4 Number of Scans        | 1024                |
| 5 Receiver Gain          | 512                 |
| 6 Relaxation Delay       | 3.0000              |
| 7 Pulse Width            | 9.2500              |
| 8 Spectrometer Frequency | 100.62              |
| 9 Nucleus                | <sup>13</sup> C     |

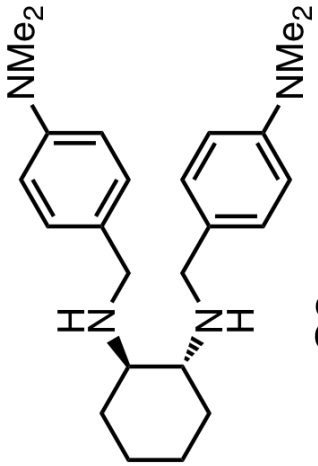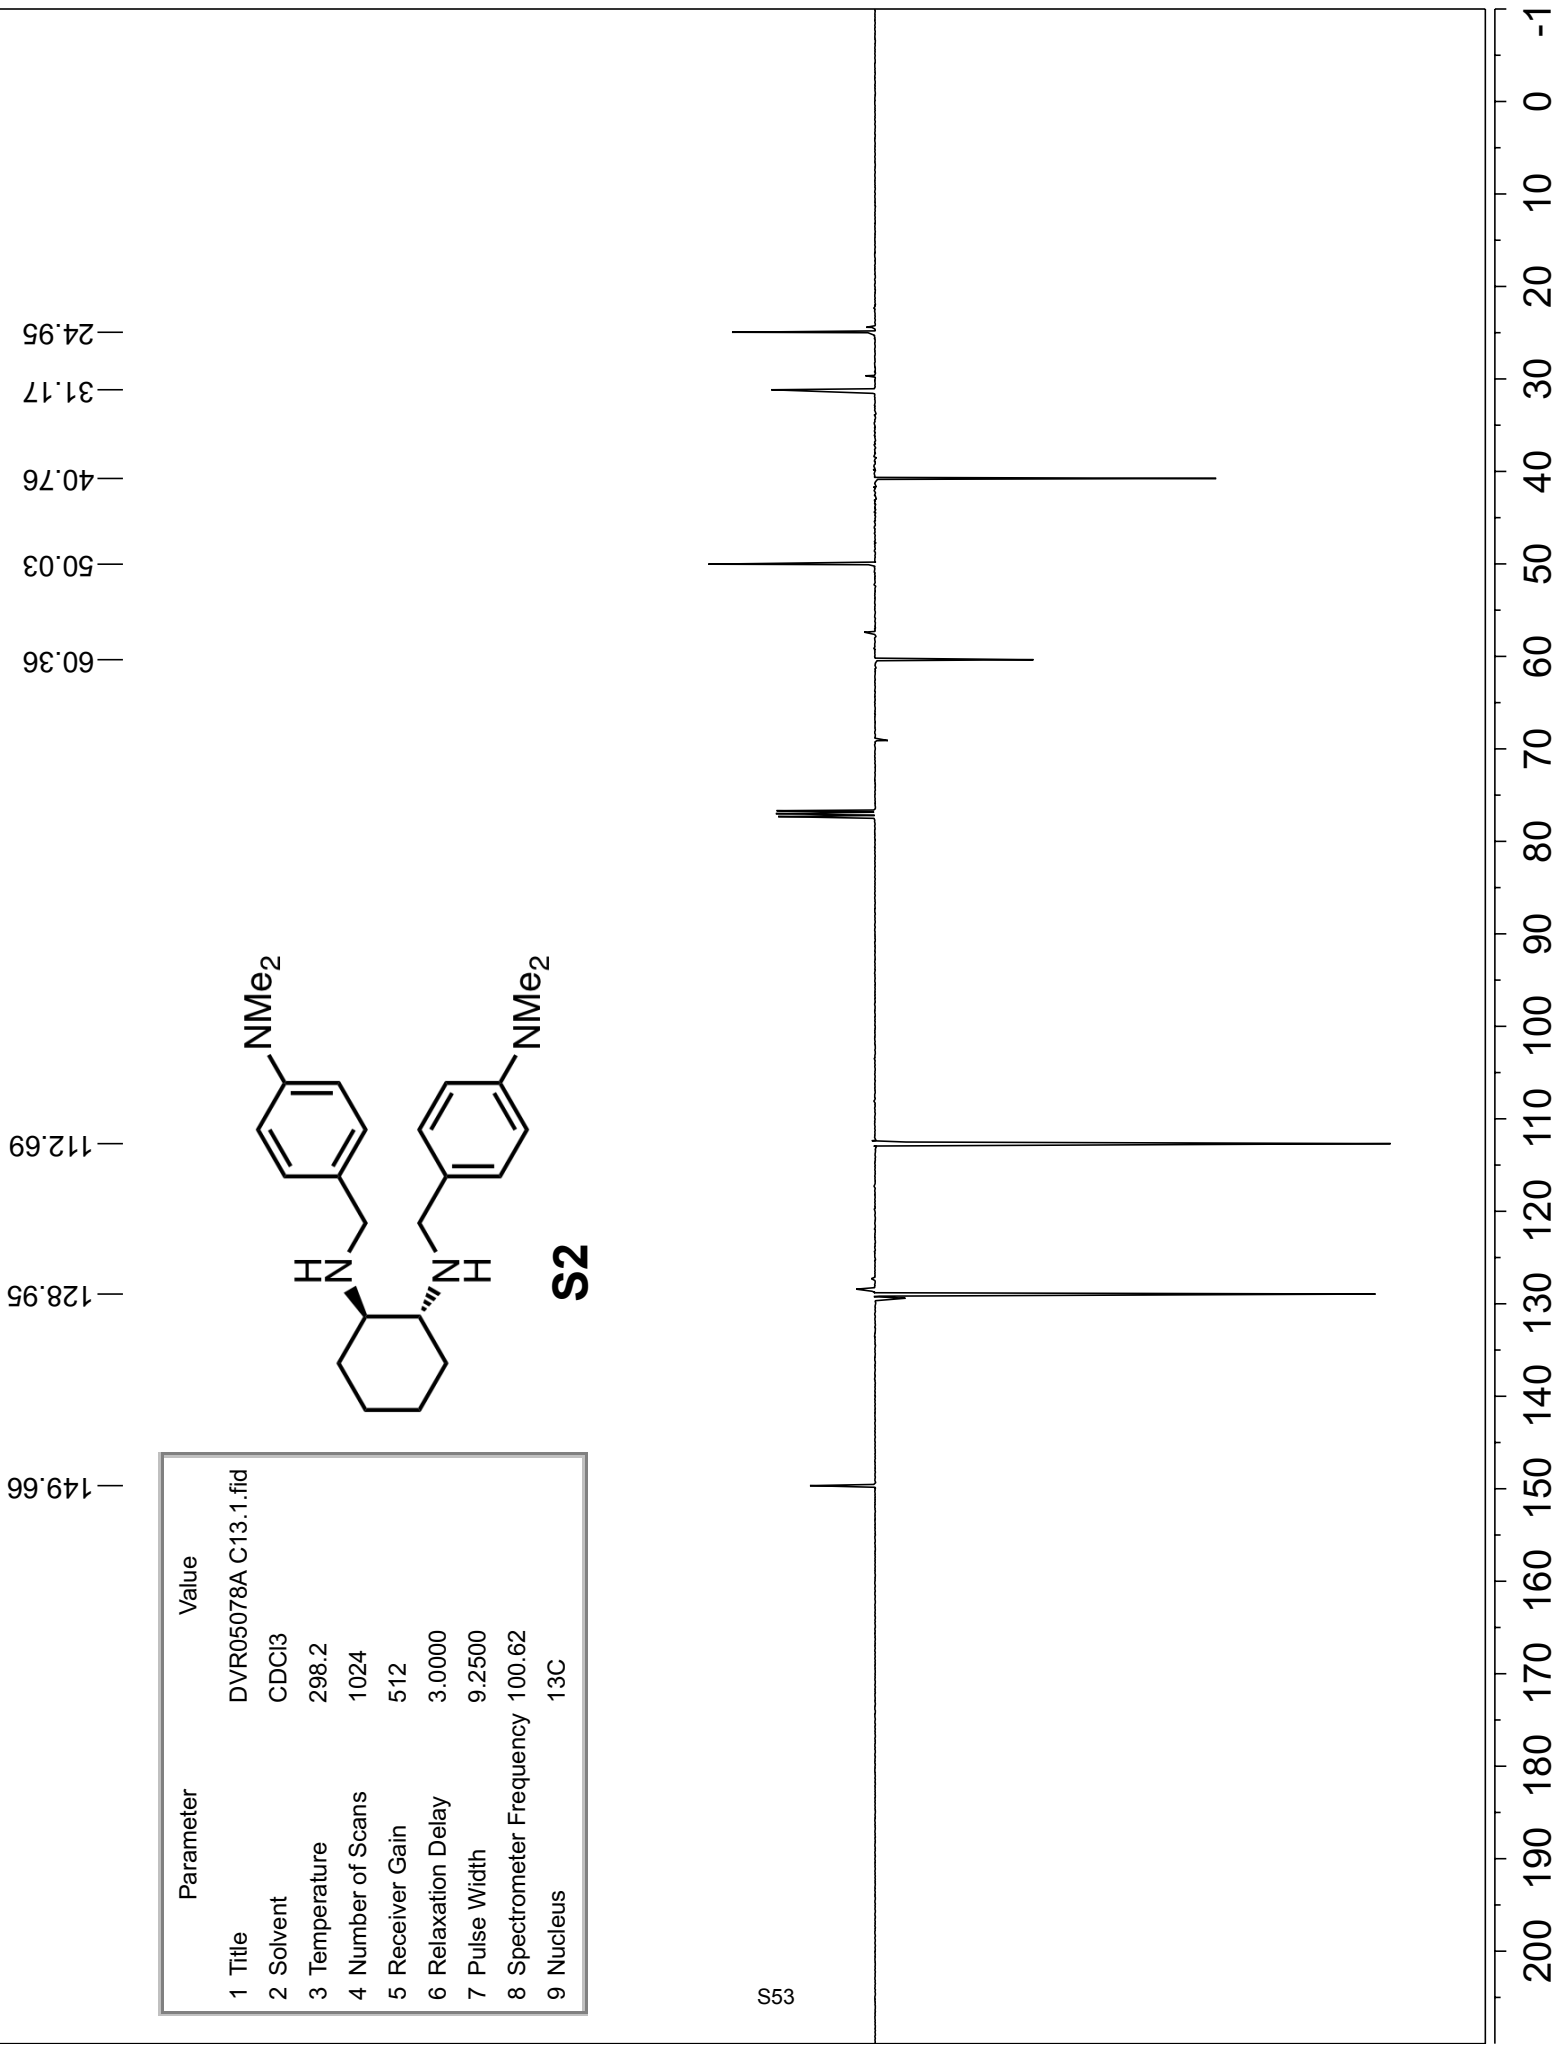

| Parameter                | Value           |
|--------------------------|-----------------|
| 1 Title                  | DVR05078C.1.fid |
| 2 Solvent                | CDCI3           |
| 3 Temperature            | 298.2           |
| 4 Number of Scans        | 16              |
| 5 Receiver Gain          | 7               |
| 6 Relaxation Delay       | 1.0000          |
| 7 Pulse Width            | 15.0000         |
| 8 Spectrometer Frequency | 400.13          |
| 9 Nucleus                | <sup>1</sup> H  |

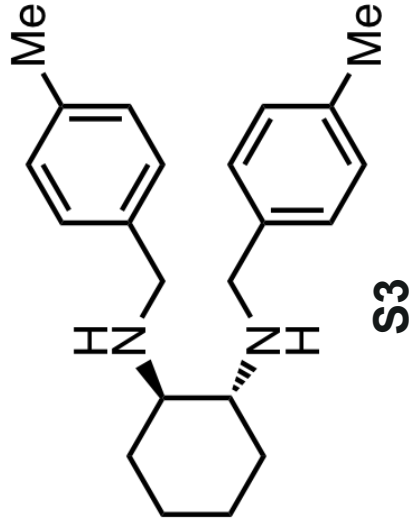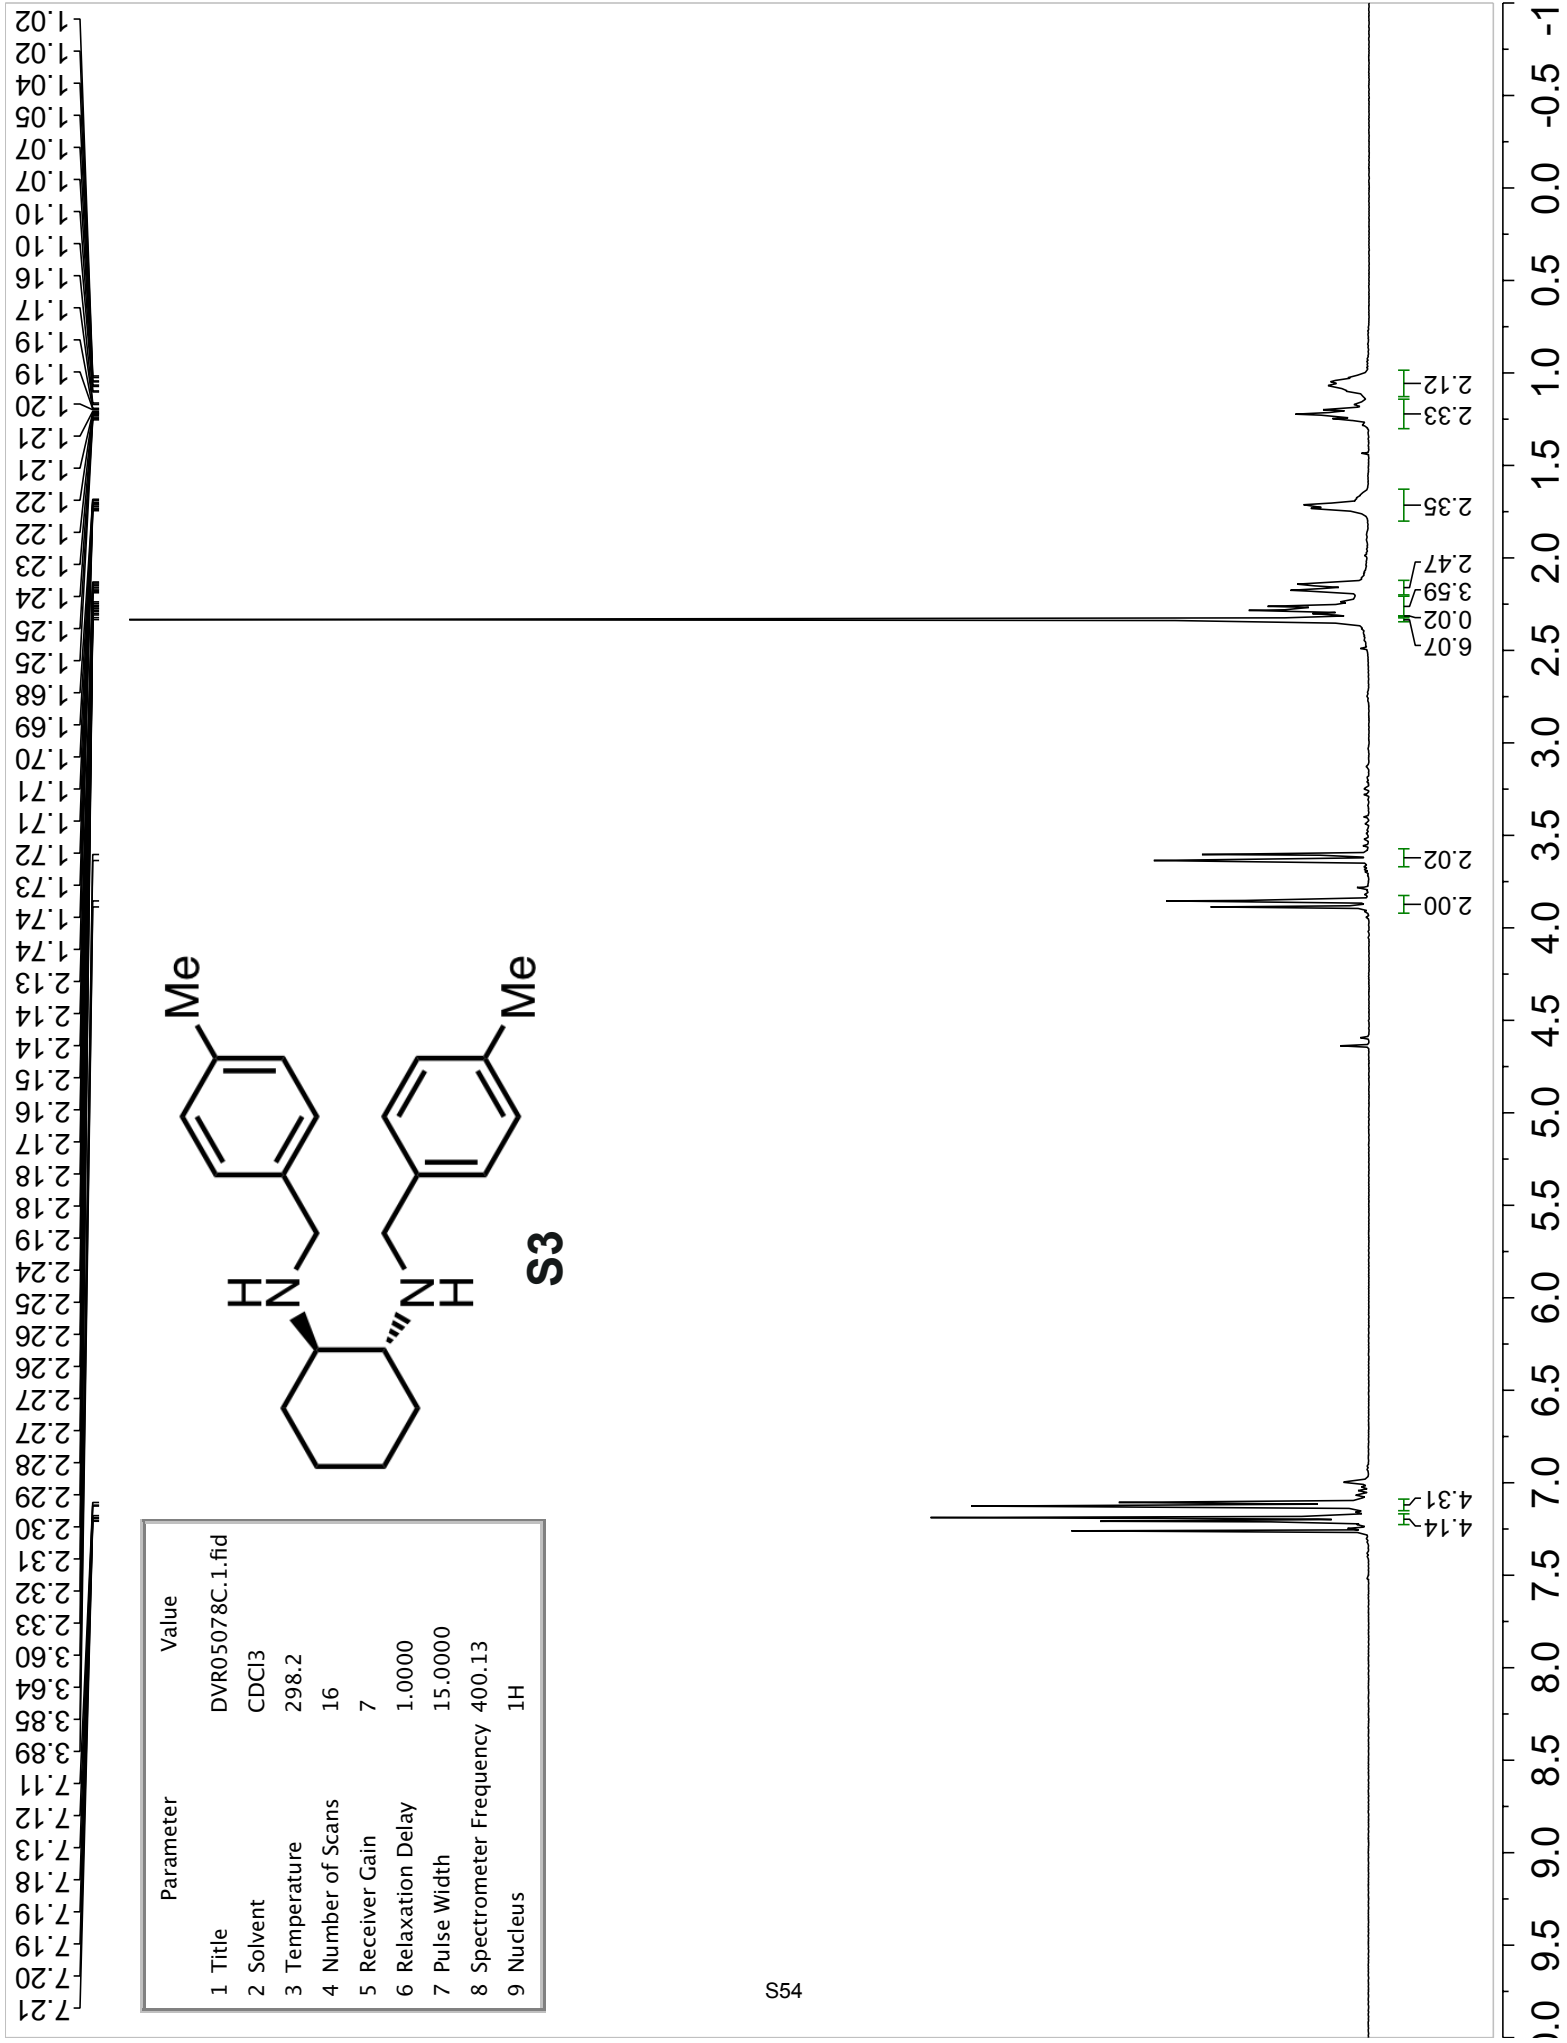

| Parameter                | Value               |
|--------------------------|---------------------|
| 1 Title                  | DVR05078C C13.1.fid |
| 2 Solvent                | CDCl3               |
| 3 Temperature            | 298.2               |
| 4 Number of Scans        | 1024                |
| 5 Receiver Gain          | 512                 |
| 6 Relaxation Delay       | 3.0000              |
| 7 Pulse Width            | 9.2500              |
| 8 Spectrometer Frequency | 100.62              |
| 9 Nucleus                | 13C                 |

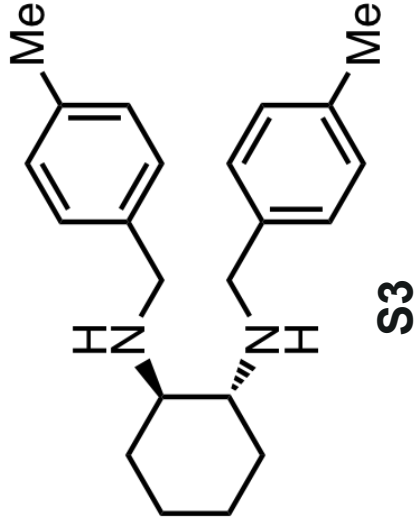

137.56  
136.28  
128.97  
127.97  
60.56  
50.36  
31.28  
24.93  
21.06

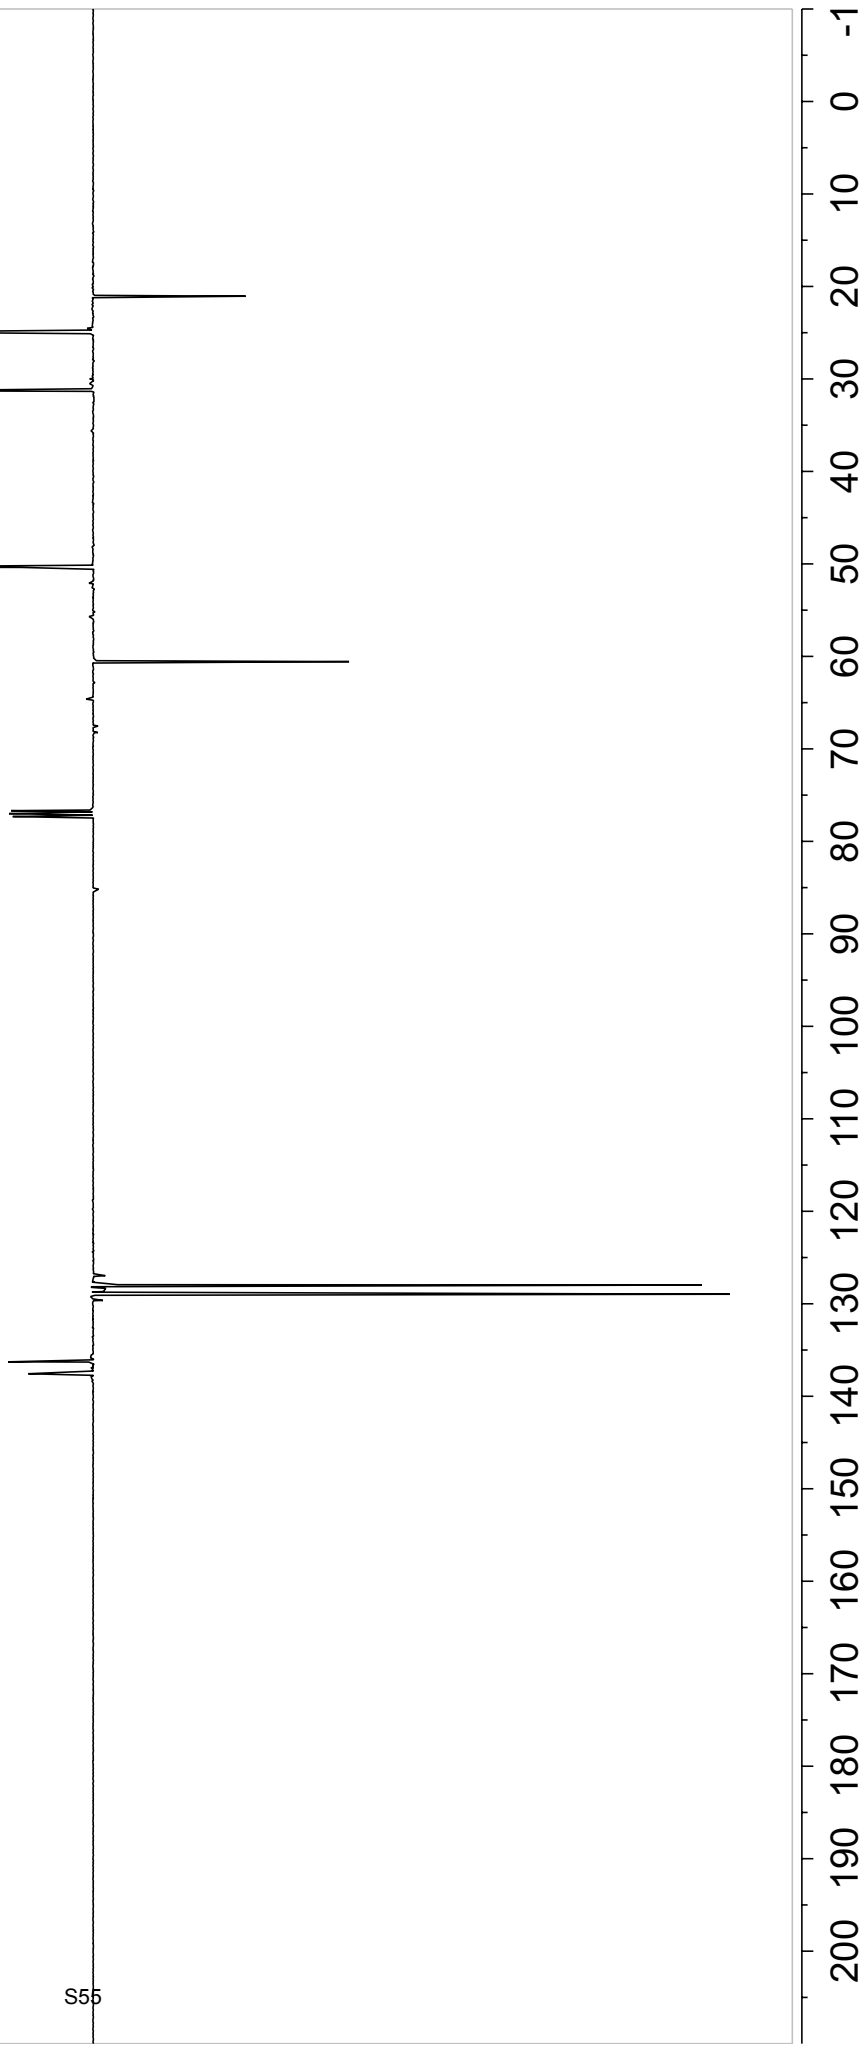

| Parameter                | Value           |
|--------------------------|-----------------|
| 1 Title                  | DVR05078D.1.fid |
| 2 Solvent                | CDCl3           |
| 3 Temperature            | 298.1           |
| 4 Number of Scans        | 16              |
| 5 Receiver Gain          | 6               |
| 6 Relaxation Delay       | 1.0000          |
| 7 Pulse Width            | 15.0000         |
| 8 Spectrometer Frequency | 400.13          |
| 9 Nucleus                | <sup>1</sup> H  |

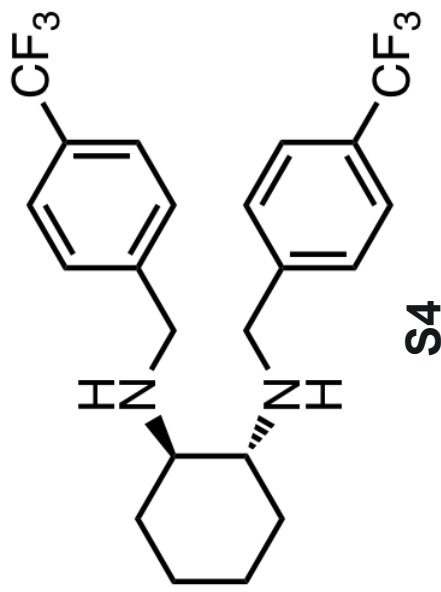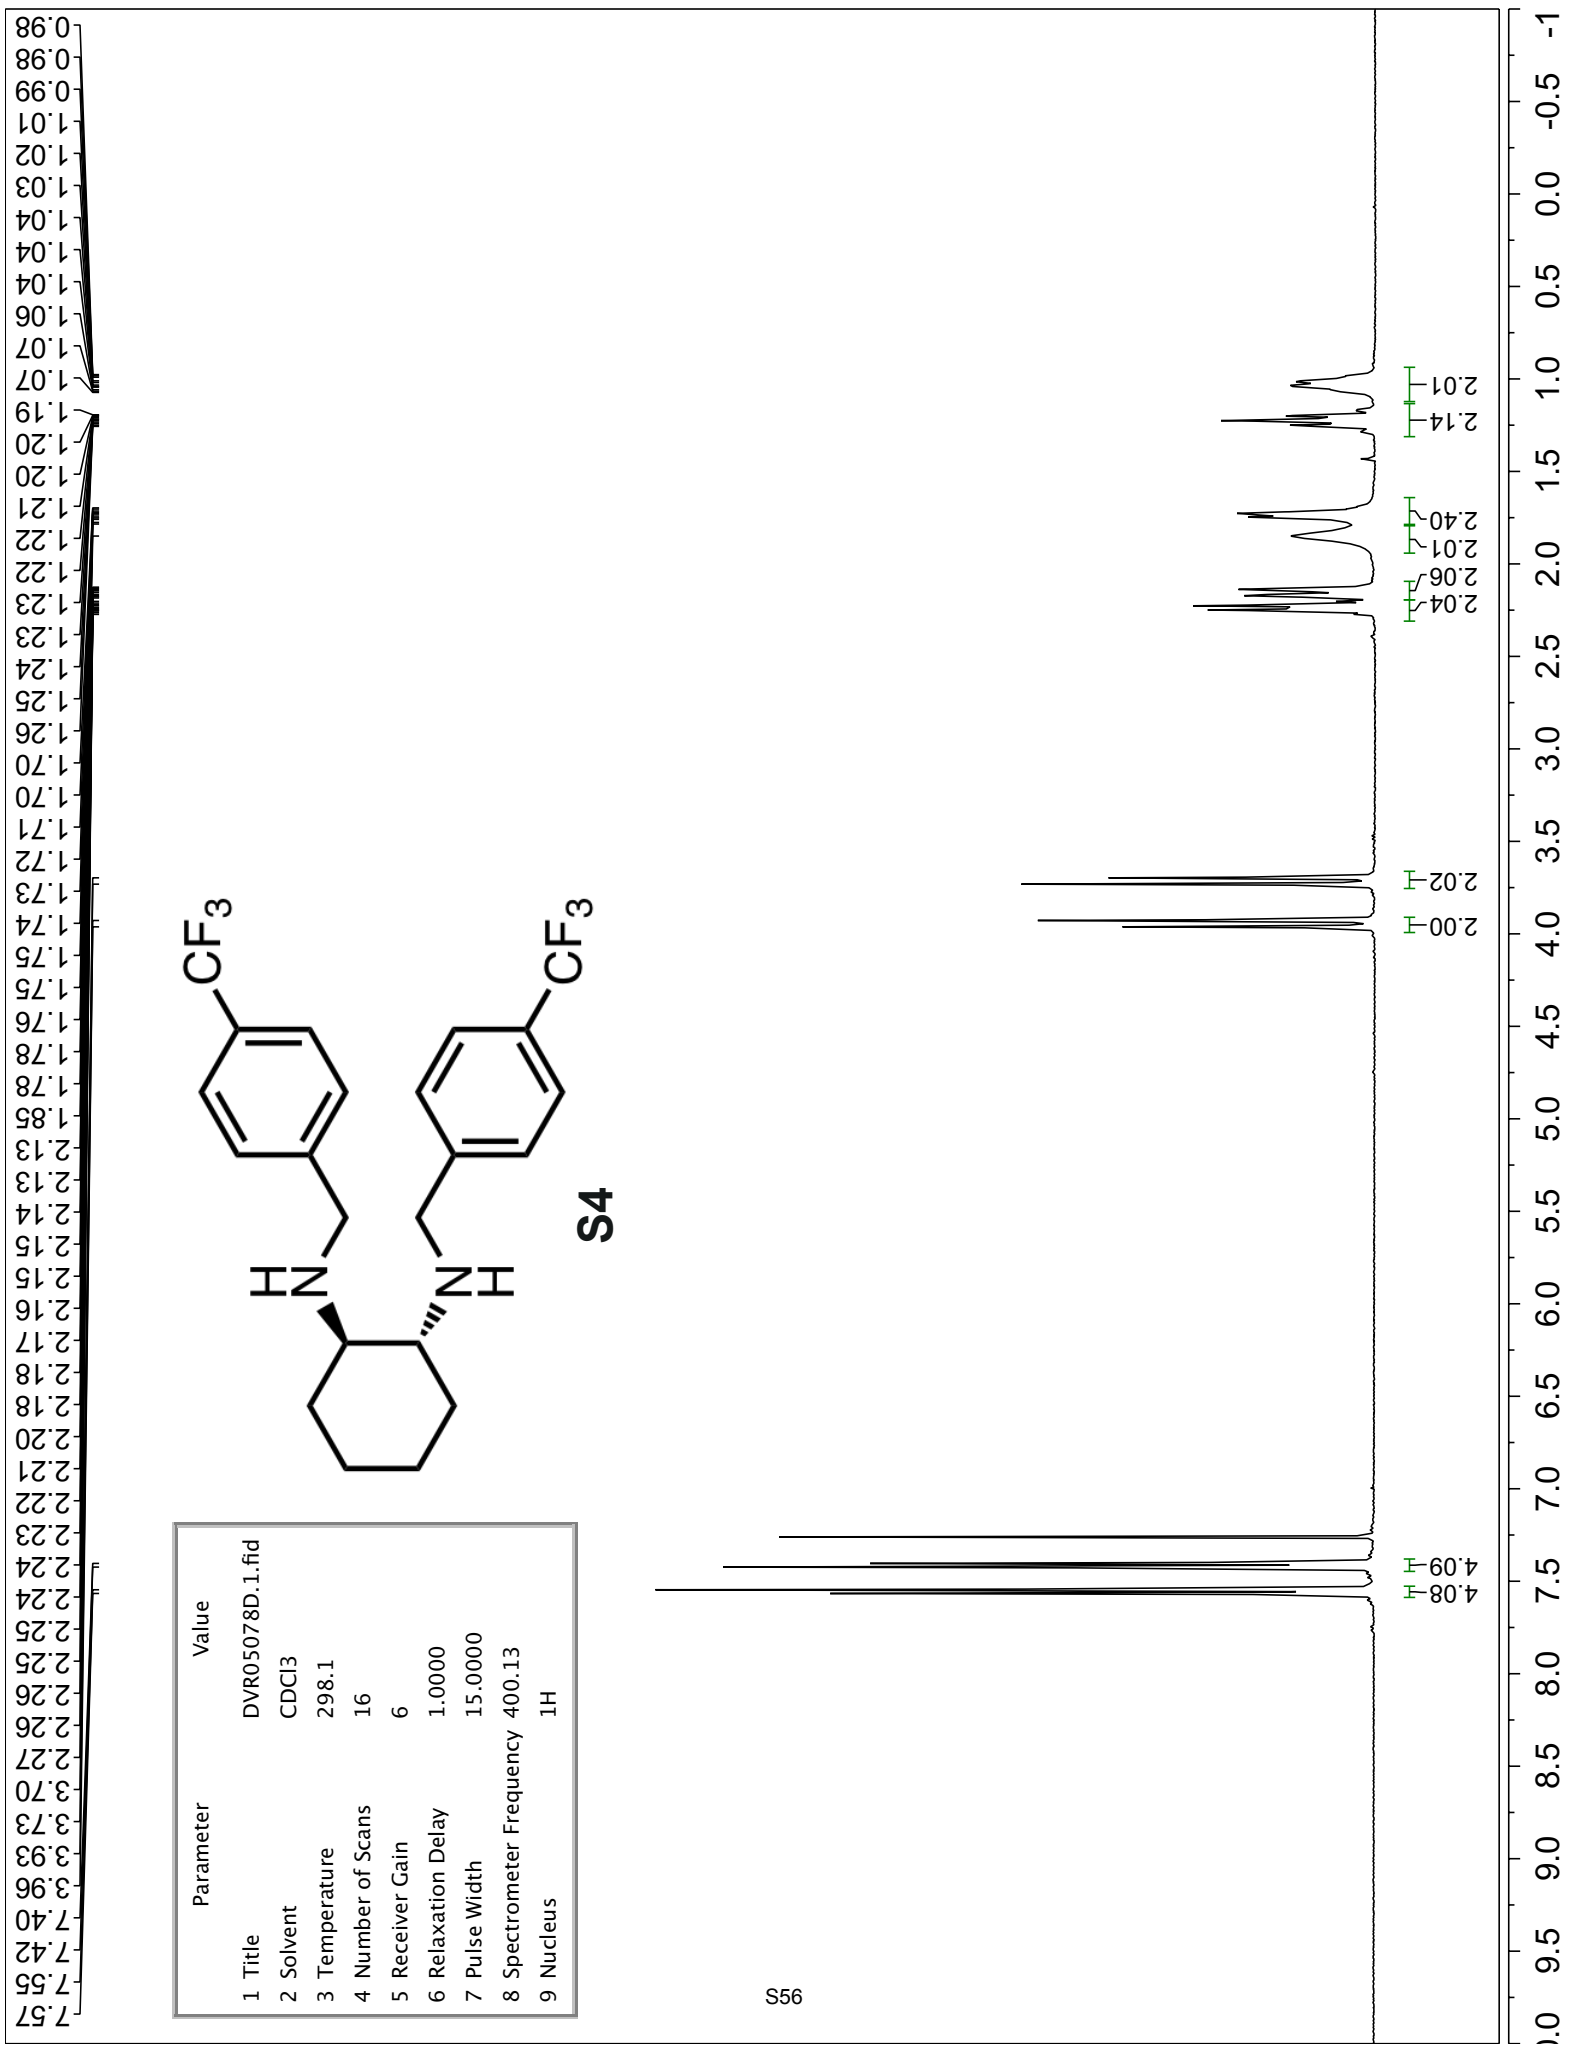

| Parameter                | Value               |
|--------------------------|---------------------|
| 1 Title                  | DVR05078D C13.1.fid |
| 2 Solvent                | CDCl3               |
| 3 Temperature            | 298.2               |
| 4 Number of Scans        | 1024                |
| 5 Receiver Gain          | 512                 |
| 6 Relaxation Delay       | 3.0000              |
| 7 Pulse Width            | 9.2500              |
| 8 Spectrometer Frequency | 100.62              |
| 9 Nucleus                | <sup>13</sup> C     |

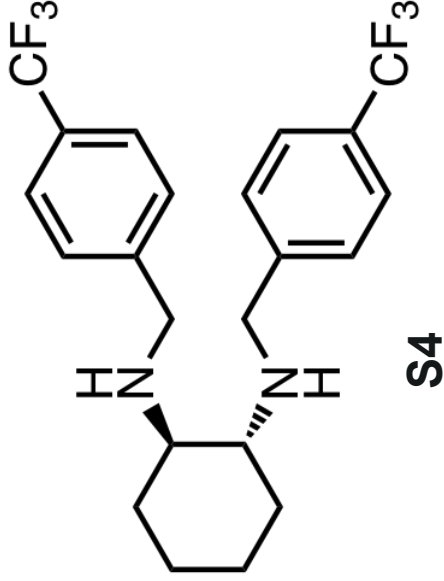

145.11  
129.49  
129.17  
128.85  
128.53  
128.15  
127.87  
125.57  
125.29  
125.25  
125.21  
125.17  
122.86  
120.16

60.94  
50.36  
31.47  
24.89

758

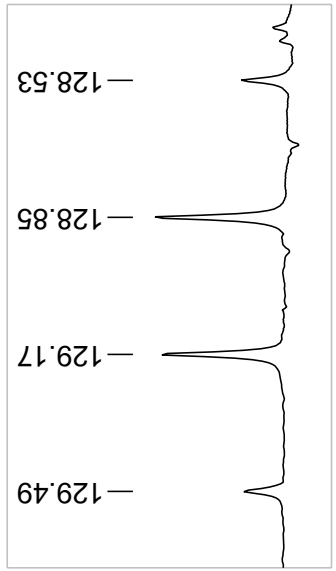

129.6 129.2 128.8 128.4

200 190 180 170 160 150 140 130 120 110 100 90 80 70 60 50 40 30 20 10 0 -1

| Parameter                | Value               |
|--------------------------|---------------------|
| 1 Title                  | DVR05078D F19.1.fid |
| 2 Solvent                | CDCl3               |
| 3 Temperature            | 297.5               |
| 4 Number of Scans        | 16                  |
| 5 Receiver Gain          | 181                 |
| 6 Relaxation Delay       | 3.0000              |
| 7 Pulse Width            | 11.6000             |
| 8 Spectrometer Frequency | 564.81              |
| 9 Nucleus                | 19F                 |

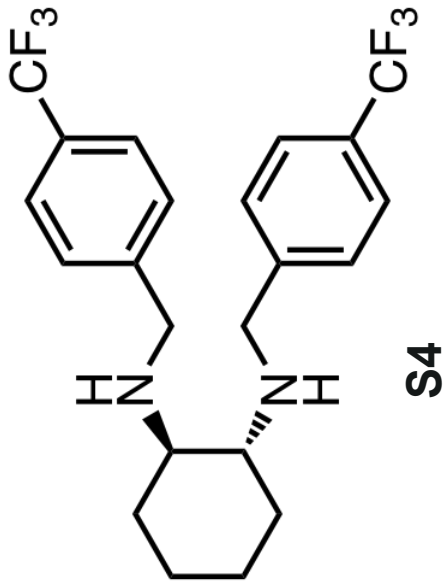**S4**



| Parameter                | Value           |
|--------------------------|-----------------|
| 1 Title                  | DVR05078E.1.fid |
| 2 Solvent                | CDCl3           |
| 3 Temperature            | 298.2           |
| 4 Number of Scans        | 16              |
| 5 Receiver Gain          | 7               |
| 6 Relaxation Delay       | 1.0000          |
| 7 Pulse Width            | 15.0000         |
| 8 Spectrometer Frequency | 400.13          |
| 9 Nucleus                | <sup>1</sup> H  |

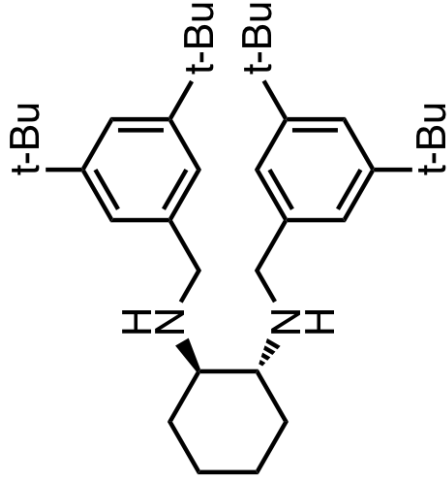

**S6**

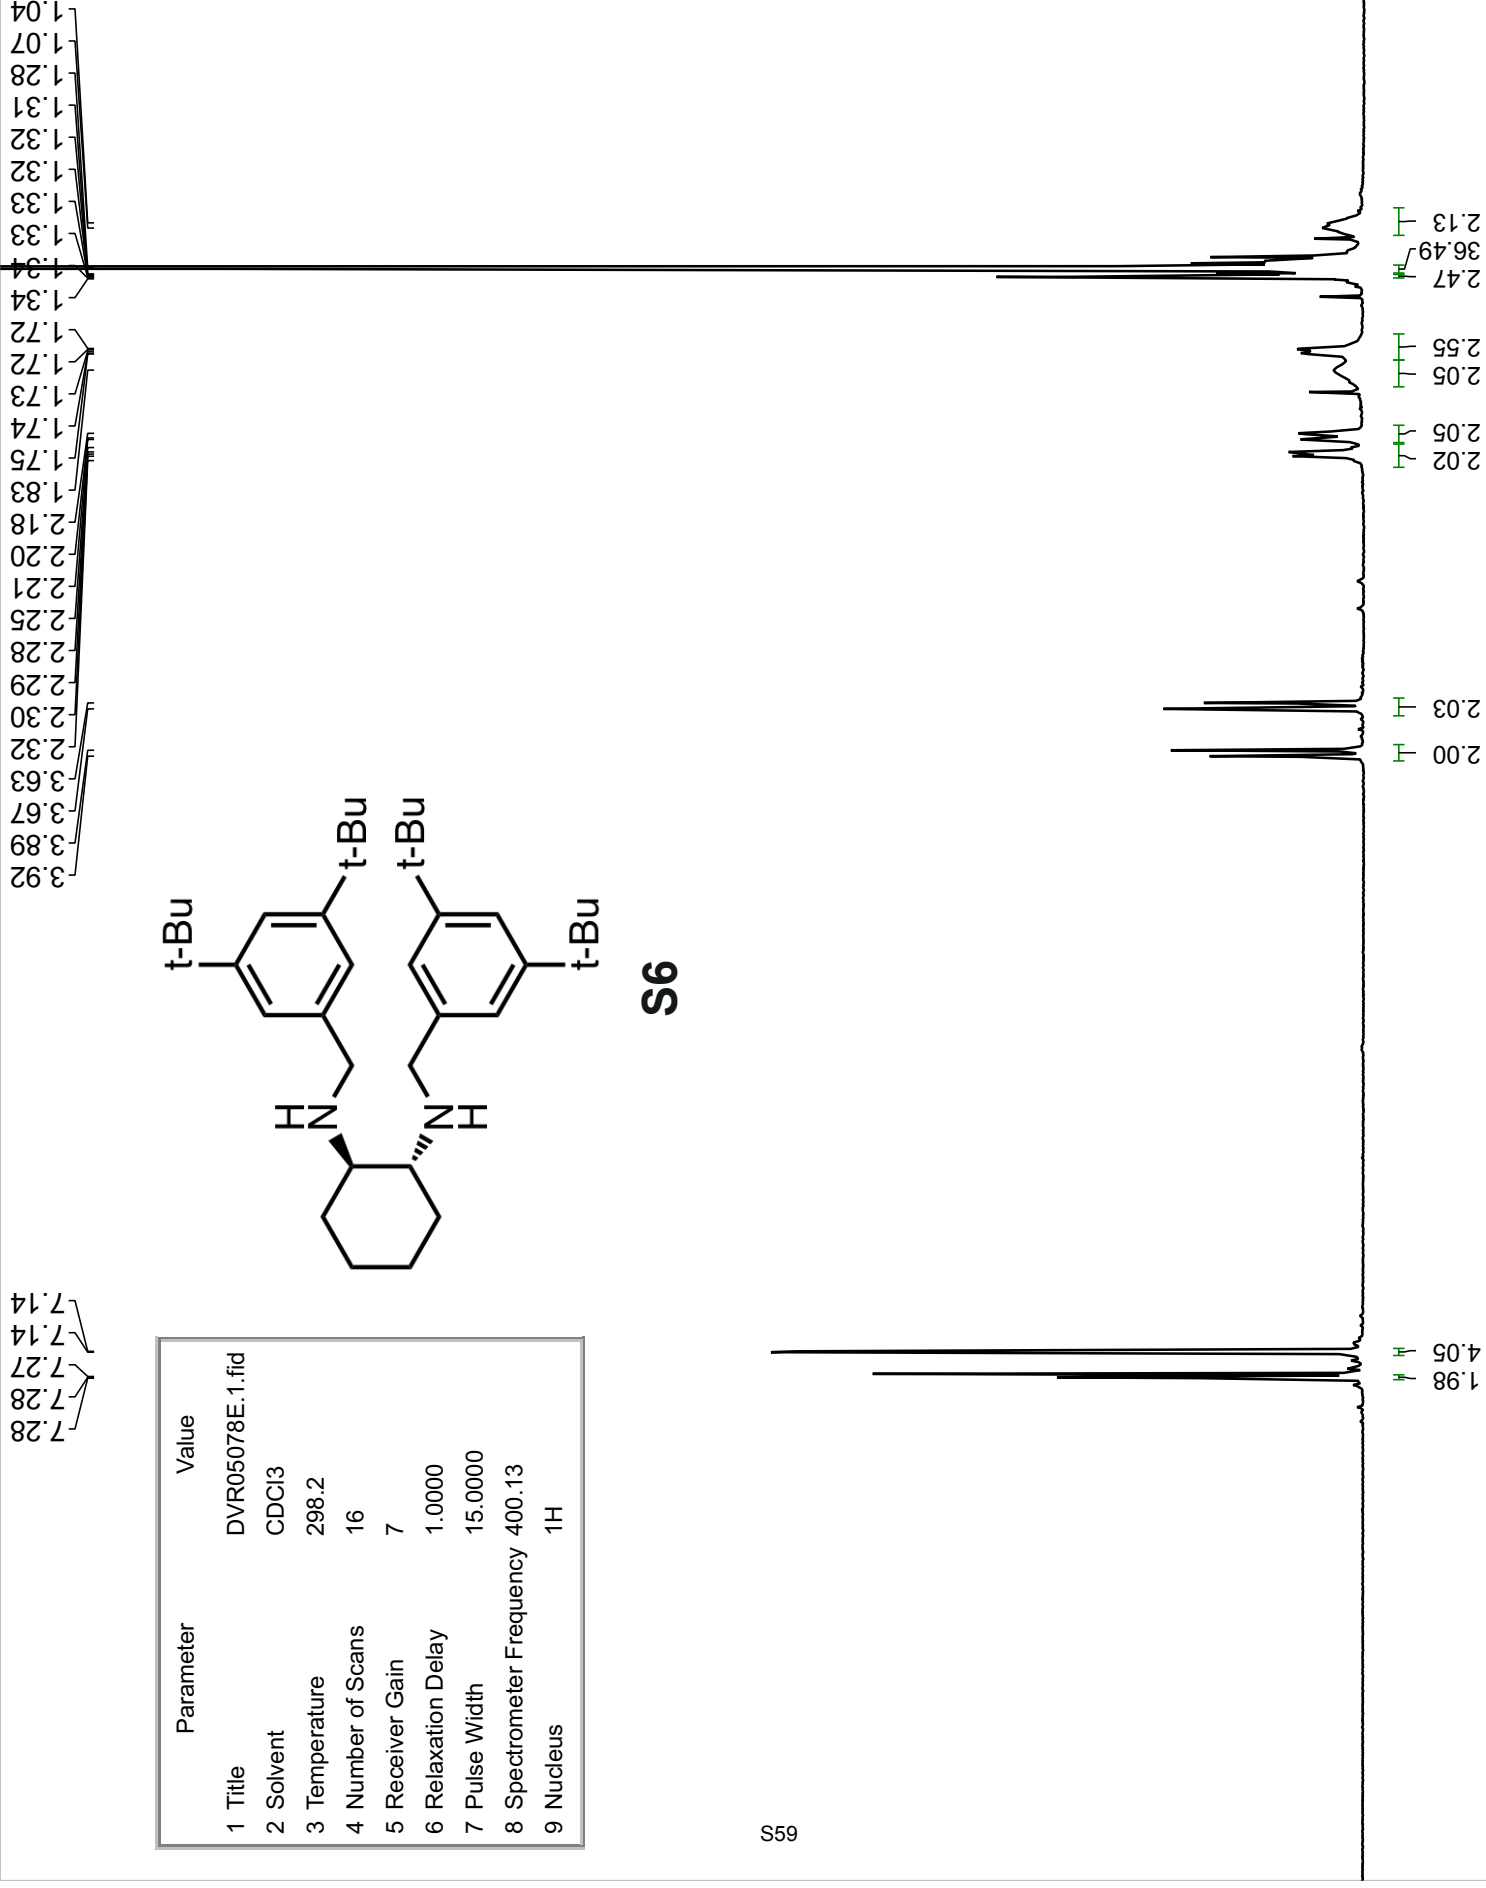

| Parameter                | Value               |
|--------------------------|---------------------|
| 1 Title                  | DVR05078E C13.1.fid |
| 2 Solvent                | CDCl3               |
| 3 Temperature            | 298.2               |
| 4 Number of Scans        | 1024                |
| 5 Receiver Gain          | 512                 |
| 6 Relaxation Delay       | 3.0000              |
| 7 Pulse Width            | 9.2500              |
| 8 Spectrometer Frequency | 100.62              |
| 9 Nucleus                | 13C                 |

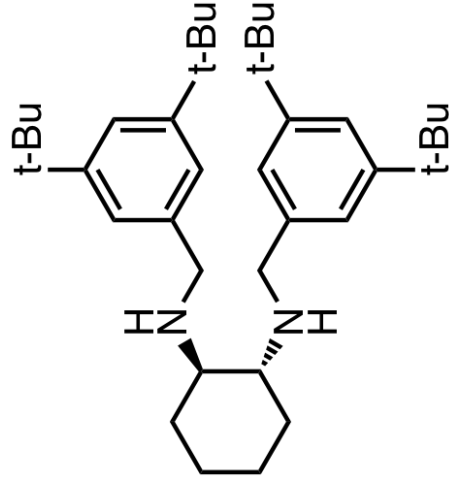

-150.53  
 -140.01  
 -122.27  
 -120.72  
 -61.02  
 -51.72  
 -34.72  
 -31.58  
 -31.47  
 -25.04

**S6**

099

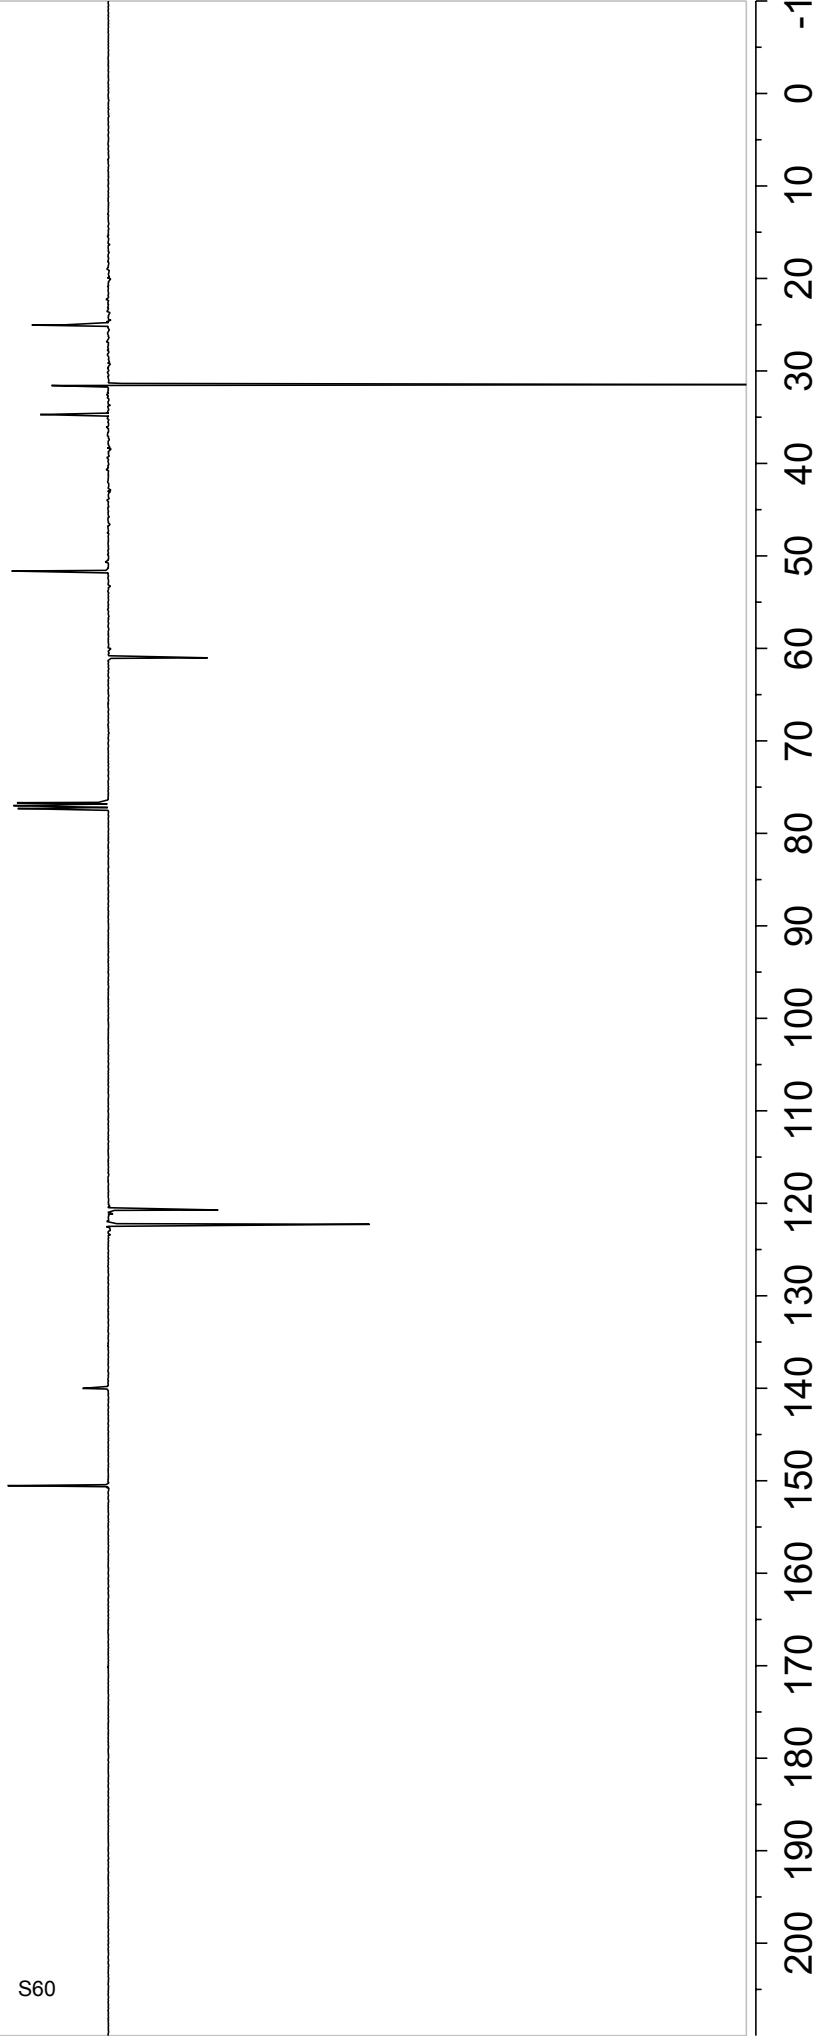





7.83  
7.82  
7.81  
7.80  
7.79  
7.76  
7.75  
7.75  
7.74  
7.74  
7.73  
7.48  
7.47  
7.46  
7.46  
7.45  
7.45  
7.44  
7.43  
7.42  
4.10  
4.06  
3.84  
3.81  
2.38  
2.35  
2.34  
2.34  
2.33  
2.33  
2.31  
2.23  
2.23  
2.20  
2.13  
2.03  
1.76  
1.75  
1.74  
1.73  
1.73  
1.72  
1.30  
1.27  
1.26  
1.25  
1.25  
1.24  
1.23  
1.22  
1.22  
1.19  
1.19  
1.10  
1.07

| Parameter                | Value           |
|--------------------------|-----------------|
| 1 Title                  | DVR05078G.1.fid |
| 2 Solvent                | CDCI3           |
| 3 Temperature            | 298.2           |
| 4 Number of Scans        | 16              |
| 5 Receiver Gain          | 7               |
| 6 Relaxation Delay       | 1.0000          |
| 7 Pulse Width            | 15.0000         |
| 8 Spectrometer Frequency | 400.13          |
| 9 Nucleus                | <sup>1</sup> H  |

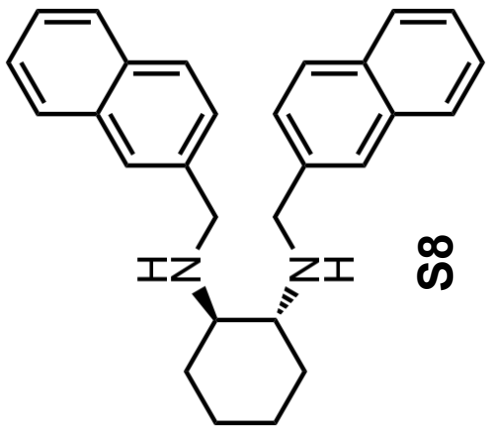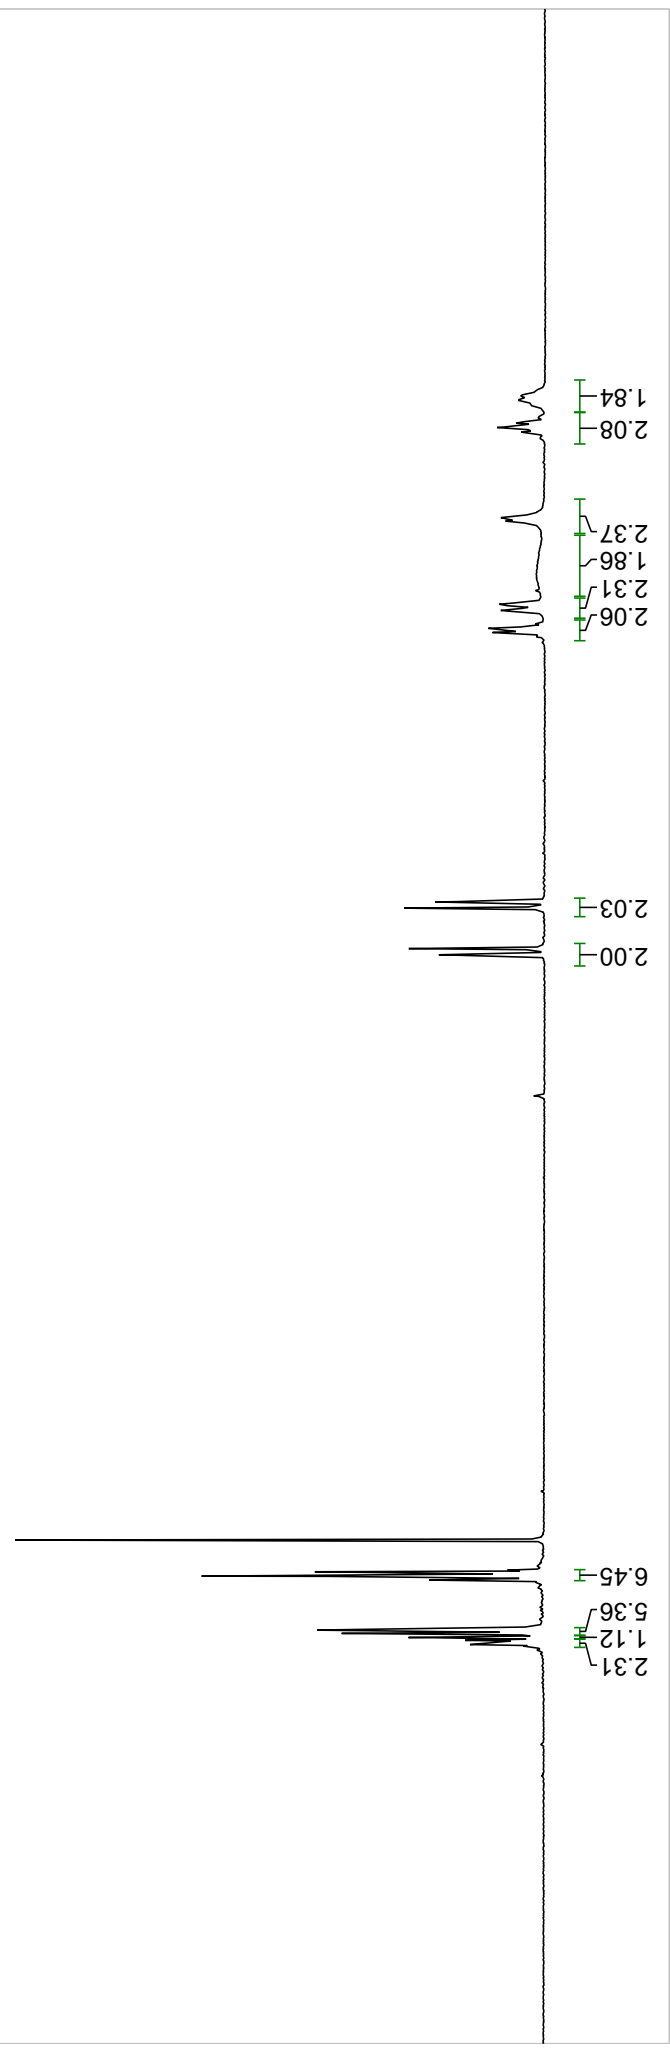

| Parameter                | Value               |
|--------------------------|---------------------|
| 1 Title                  | DVR05078F C13.1.fid |
| 2 Solvent                | CDCl3               |
| 3 Temperature            | 298.2               |
| 4 Number of Scans        | 1024                |
| 5 Receiver Gain          | 512                 |
| 6 Relaxation Delay       | 3.0000              |
| 7 Pulse Width            | 9.2500              |
| 8 Spectrometer Frequency | 100.62              |
| 9 Nucleus                | <sup>13</sup> C     |

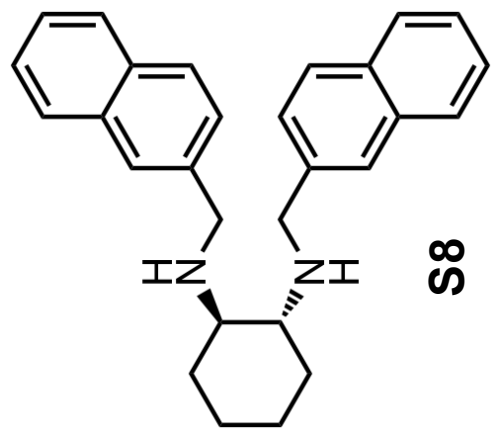

136.26  
133.69  
131.71  
128.42  
127.49  
125.83  
125.81  
125.42  
125.22  
123.81

61.39  
48.75  
31.57  
25.05

210 200 190 180 170 160 150 140 130 120 110 100 90 80 70 60 50 40 30 20 10 0

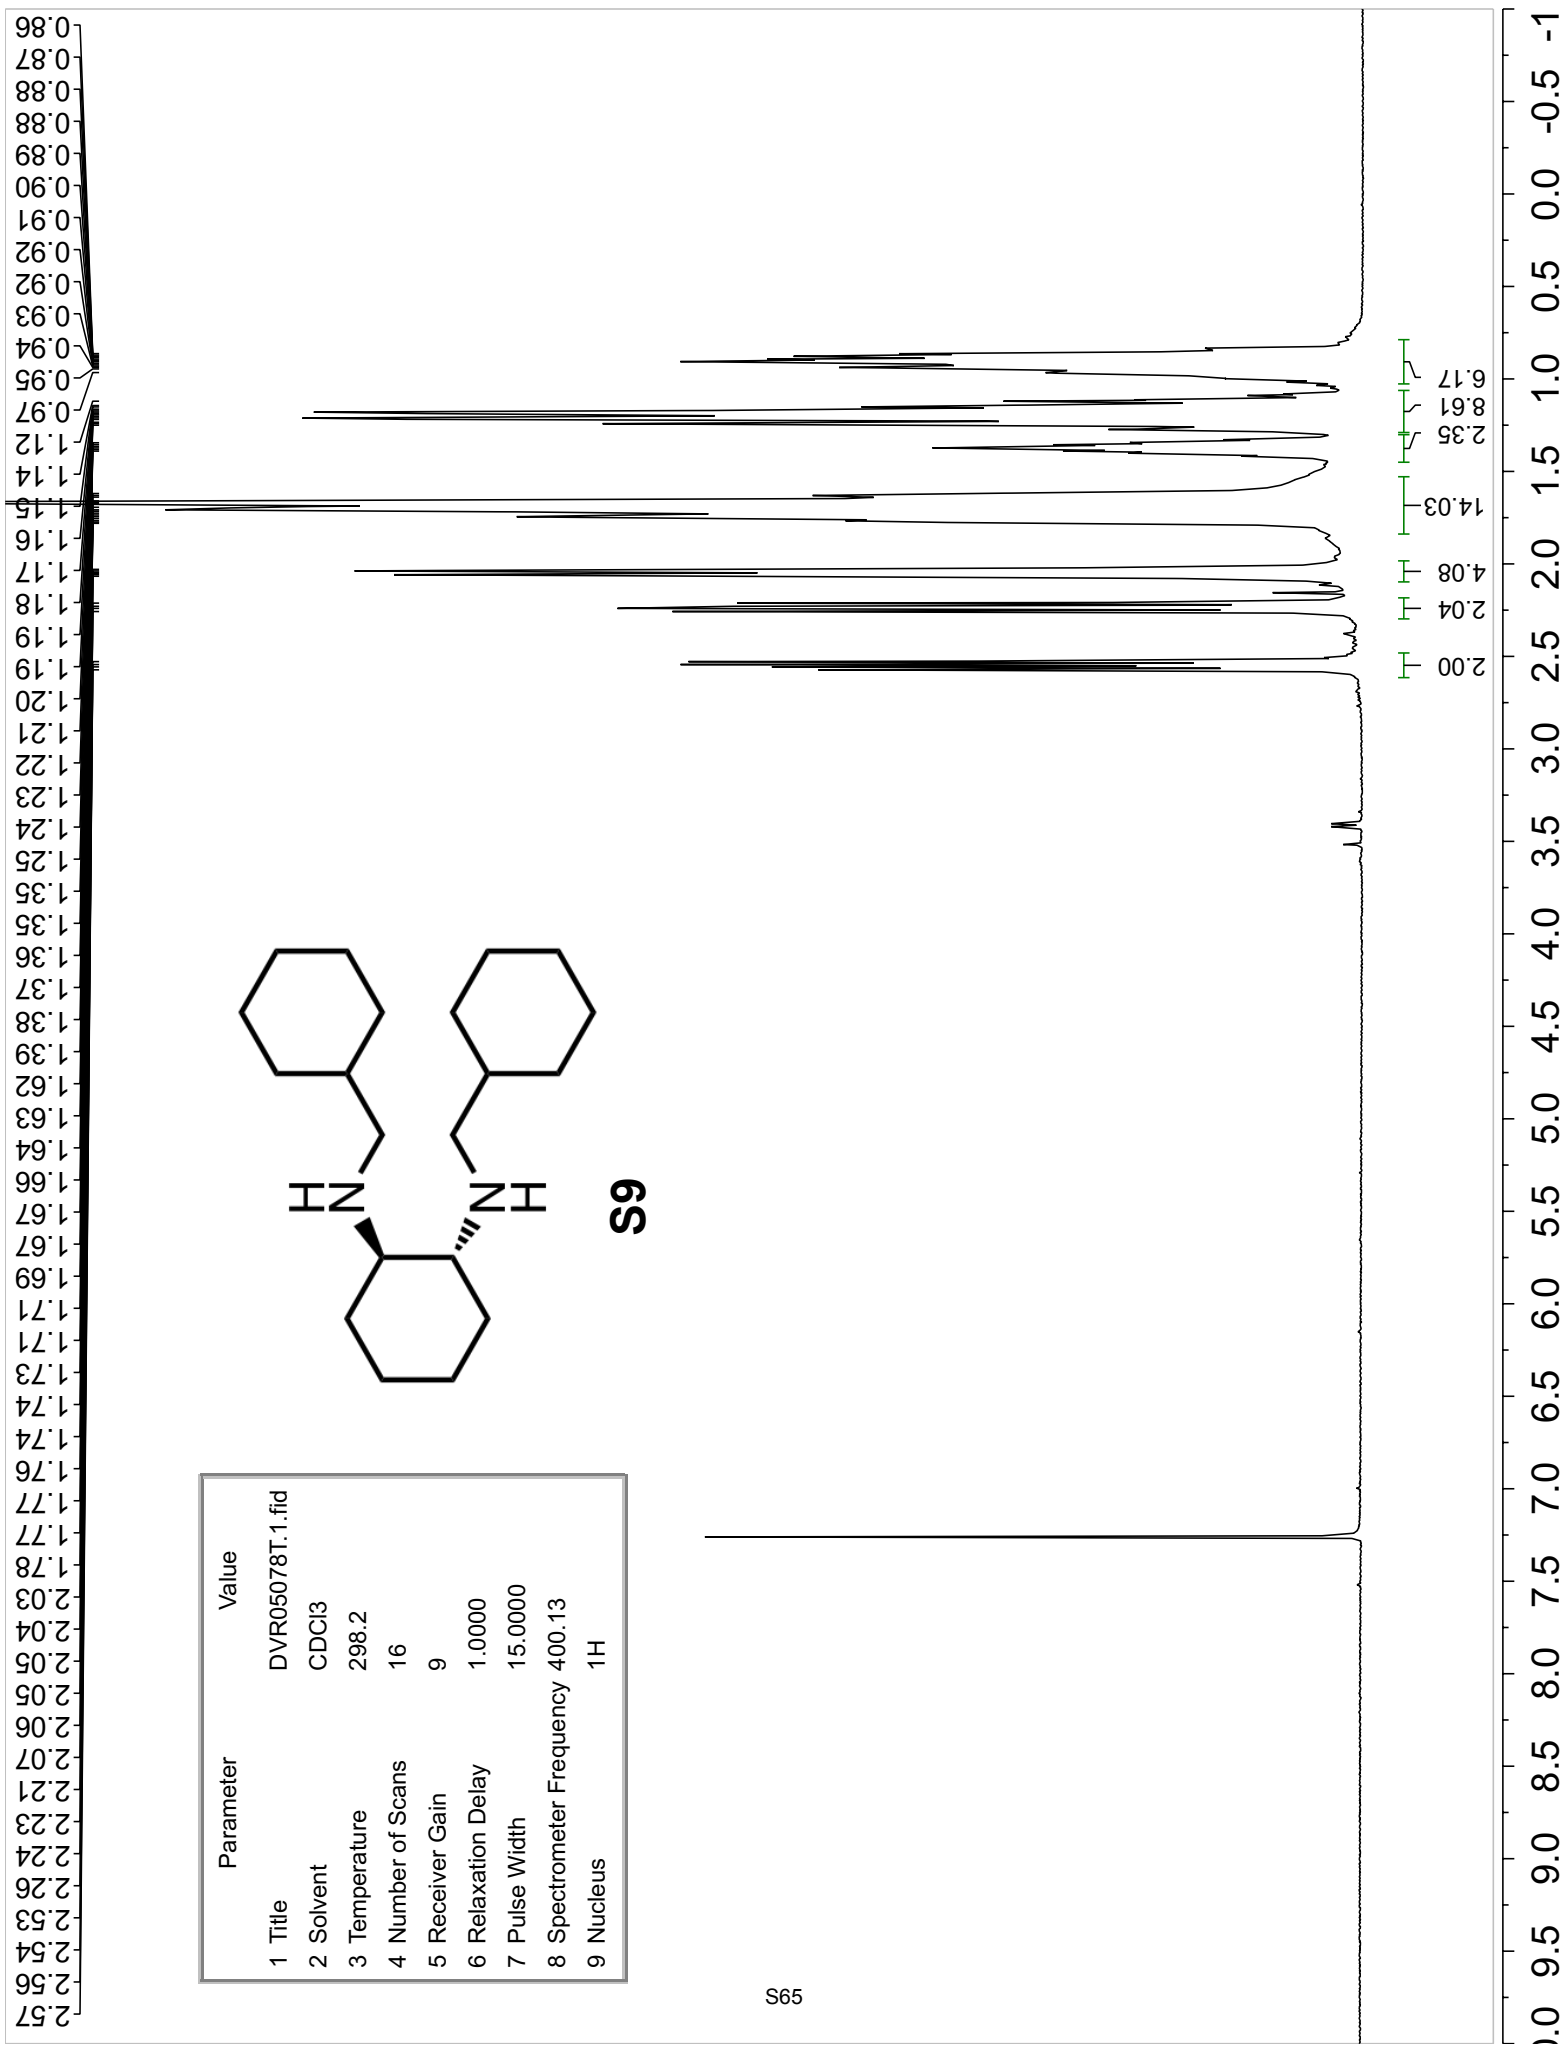

| Parameter                | Value           |
|--------------------------|-----------------|
| 1 Title                  | DVR05078T.1.fid |
| 2 Solvent                | CDCl3           |
| 3 Temperature            | 298.2           |
| 4 Number of Scans        | 16              |
| 5 Receiver Gain          | 9               |
| 6 Relaxation Delay       | 1.0000          |
| 7 Pulse Width            | 15.0000         |
| 8 Spectrometer Frequency | 400.13          |
| 9 Nucleus                | <sup>1</sup> H  |

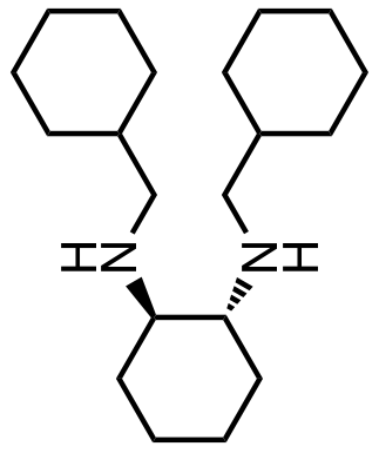

S9

| Parameter                | Value               |
|--------------------------|---------------------|
| 1 Title                  | DVR05078T C13.1.fid |
| 2 Solvent                | CDCl3               |
| 3 Temperature            | 298.2               |
| 4 Number of Scans        | 1024                |
| 5 Receiver Gain          | 512                 |
| 6 Relaxation Delay       | 3.0000              |
| 7 Pulse Width            | 9.2500              |
| 8 Spectrometer Frequency | 100.62              |
| 9 Nucleus                | 13C                 |

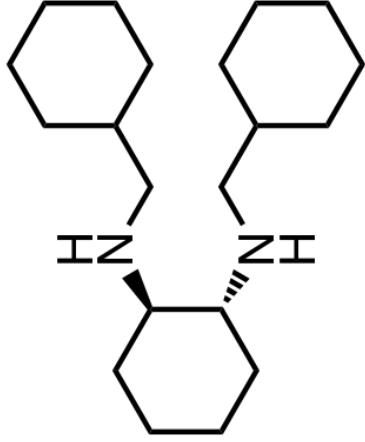

**S9**

61.83  
53.74  
38.35  
31.72  
31.53  
31.41  
26.71  
26.04  
25.12

200 190 180 170 160 150 140 130 120 110 100 90 80 70 60 50 40 30 20 10 0 -1



| Parameter                | Value           |
|--------------------------|-----------------|
| 1 Title                  | DVR050781.1.fid |
| 2 Solvent                | CDCl3           |
| 3 Temperature            | 298.2           |
| 4 Number of Scans        | 16              |
| 5 Receiver Gain          | 9               |
| 6 Relaxation Delay       | 1.0000          |
| 7 Pulse Width            | 15.0000         |
| 8 Spectrometer Frequency | 400.13          |
| 9 Nucleus                | <sup>1</sup> H  |

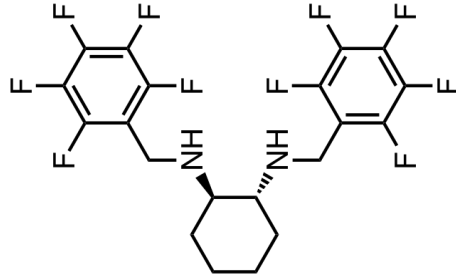

**S10**

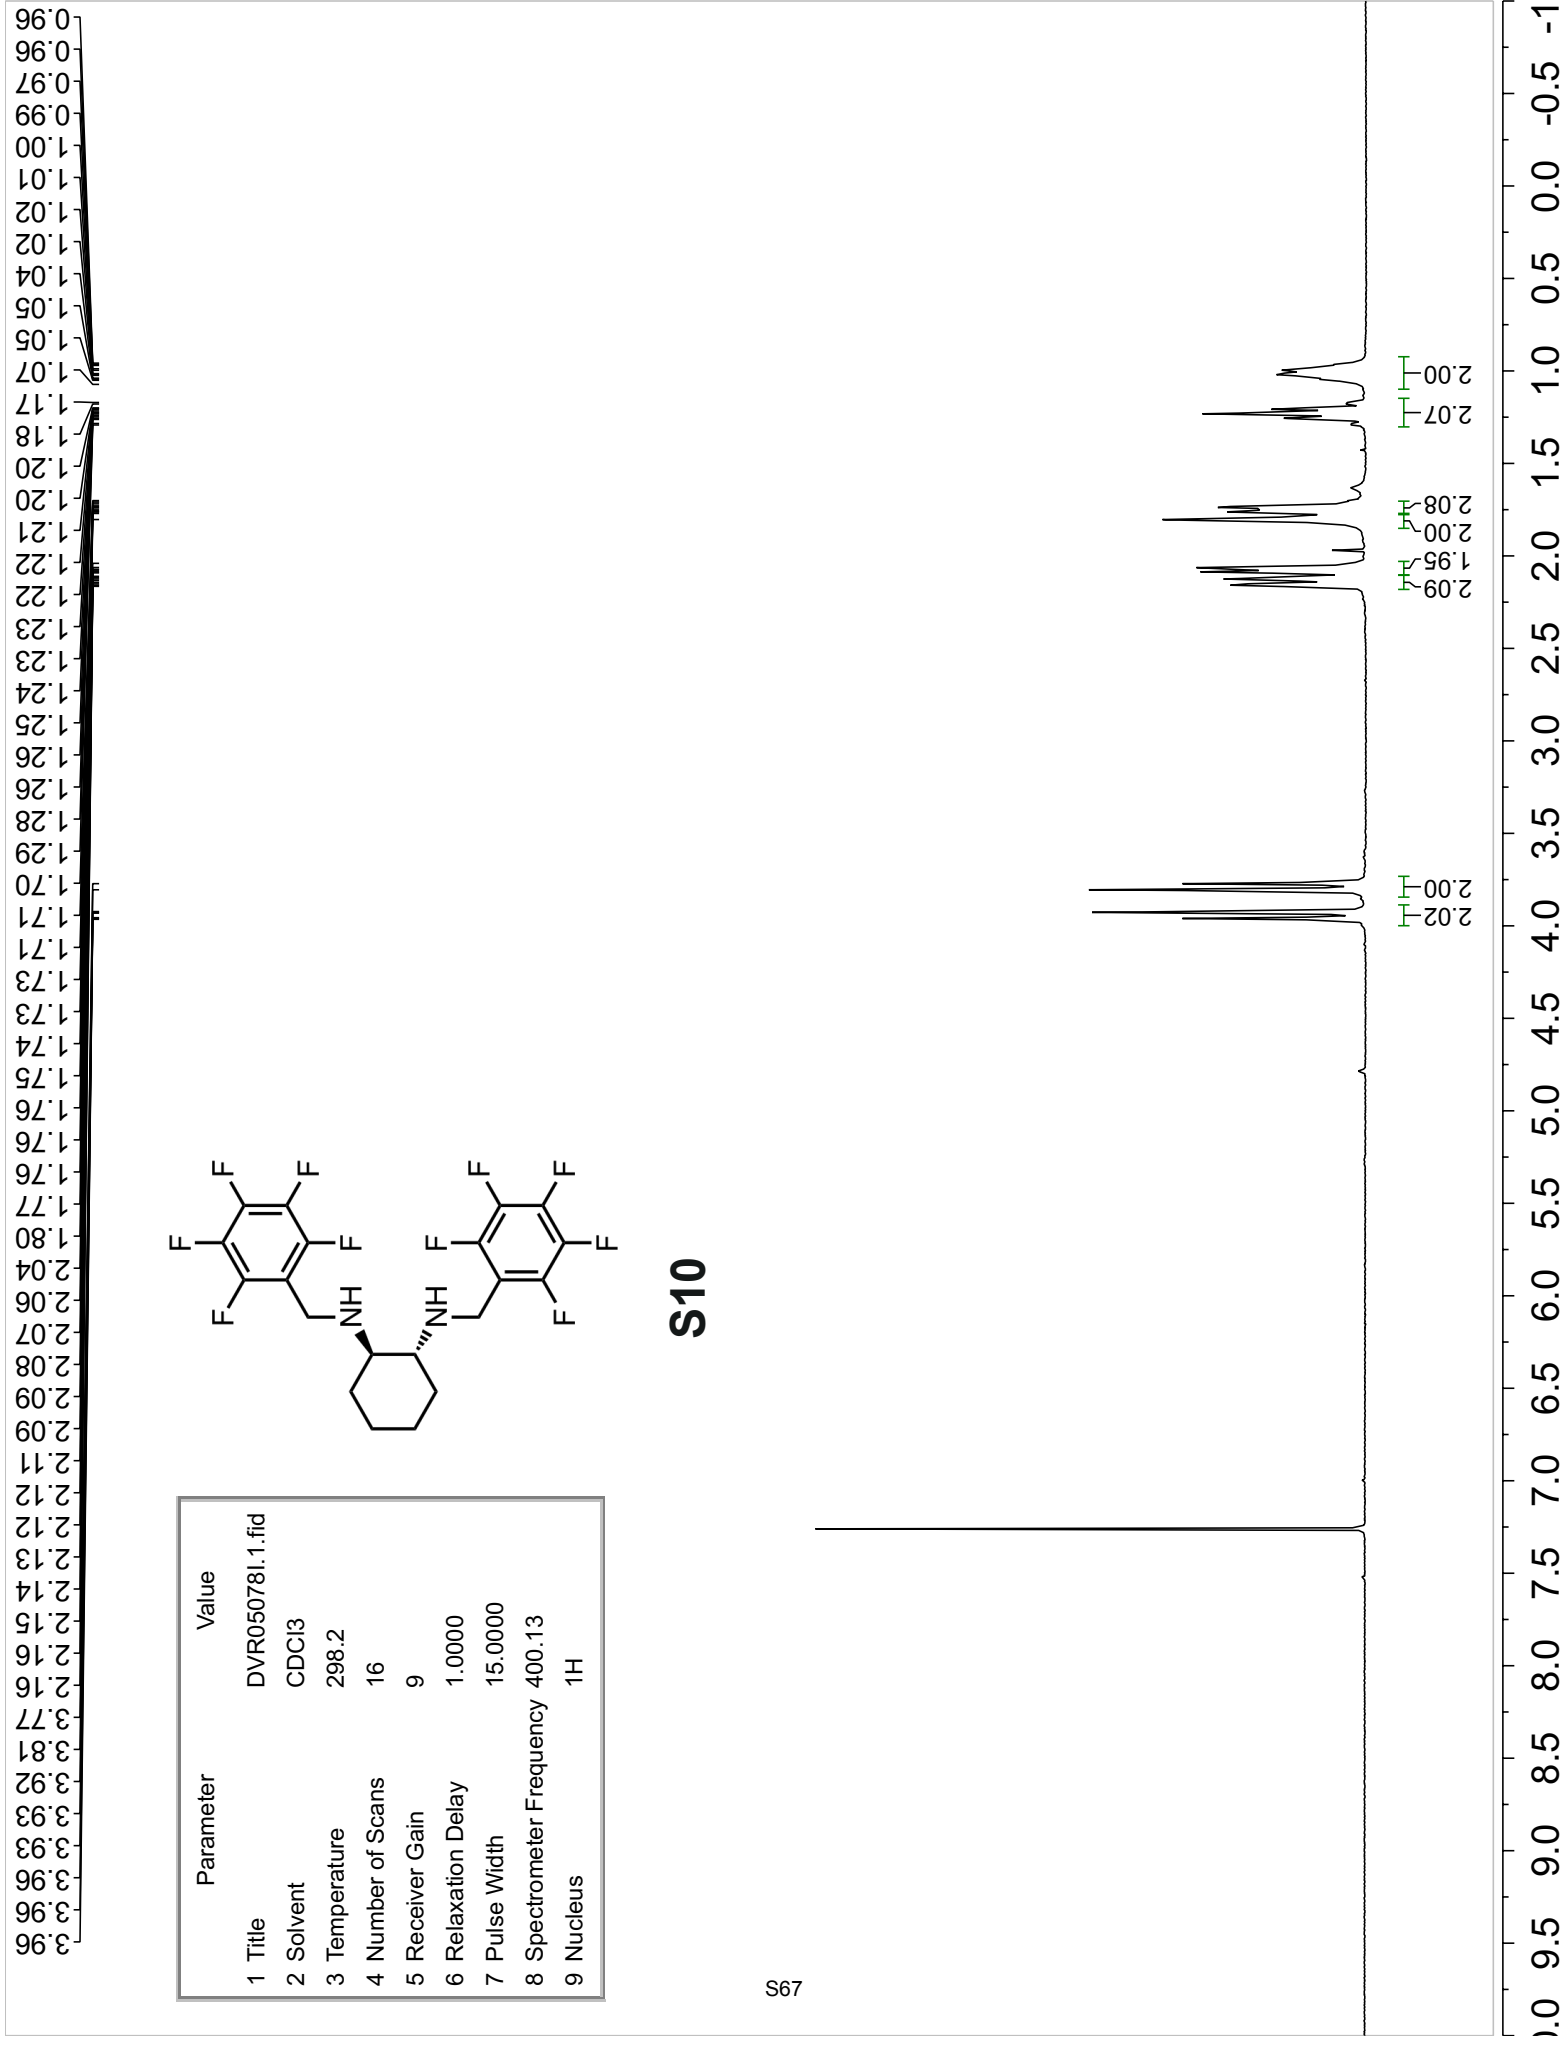

146.59  
146.32  
144.14  
143.87  
141.78  
141.38  
139.26  
138.94  
138.75  
138.41  
136.26  
135.92  
113.99  
113.58

| Parameter                | Value               |
|--------------------------|---------------------|
| 1 Title                  | DVR050781 C13.1.fid |
| 2 Solvent                | CDCI3               |
| 3 Temperature            | 298.2               |
| 4 Number of Scans        | 1024                |
| 5 Receiver Gain          | 512                 |
| 6 Relaxation Delay       | 3.0000              |
| 7 Pulse Width            | 9.2500              |
| 8 Spectrometer Frequency | 100.62              |
| 9 Nucleus                | 13C                 |

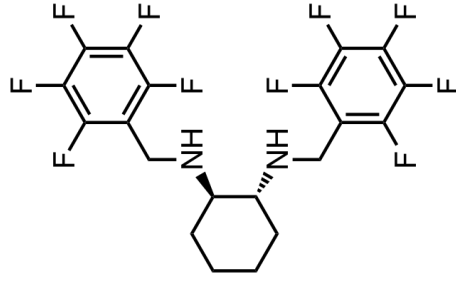

**S10**

60.63  
37.87  
31.40  
24.83

210 200 190 180 170 160 150 140 130 120 110 100 90 80 70 60 50 40 30 20 10 0 -10

| Parameter                | Value               |
|--------------------------|---------------------|
| 1 Title                  | DVR050781 F19.1.fid |
| 2 Solvent                | CDCI3               |
| 3 Temperature            | 297.5               |
| 4 Number of Scans        | 16                  |
| 5 Receiver Gain          | 456                 |
| 6 Relaxation Delay       | 3.0000              |
| 7 Pulse Width            | 11.6000             |
| 8 Spectrometer Frequency | 564.81              |
| 9 Nucleus                | <sup>19</sup> F     |

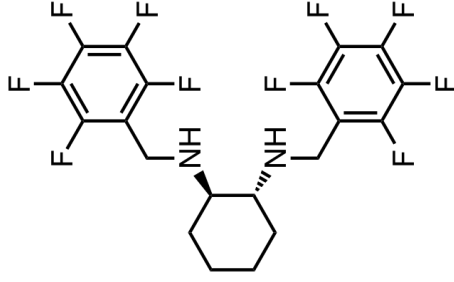

**S10**

-144.63  
-144.64  
-144.67  
-144.68  
-155.89  
-155.92  
-155.96  
-162.25  
-162.27  
-162.29  
-162.31  
-162.33  
-162.35

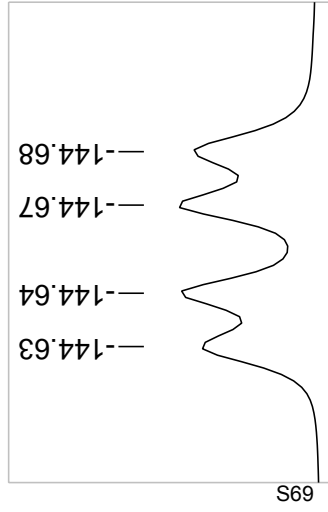

-144.60 -144.66 -144.72

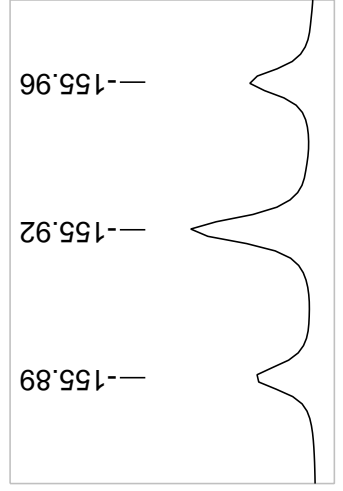

-155.90 -155.94 -155.98

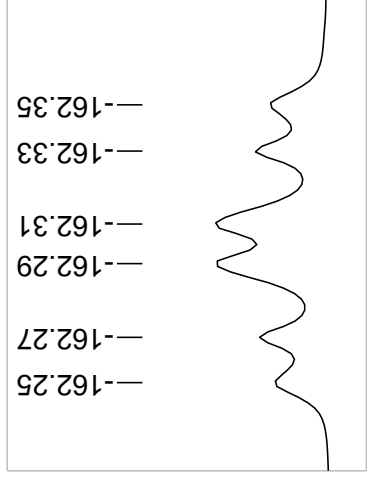

-162.25 -162.30 -162.35

10 0 -10 -20 -30 -40 -50 -60 -70 -80 -90 -100 -110 -120 -130 -140 -150 -160 -170 -180 -190 -200 -210

| Parameter                | Value           |
|--------------------------|-----------------|
| 1 Title                  | DVR05078J.1.fid |
| 2 Solvent                | CDCl3           |
| 3 Temperature            | 298.2           |
| 4 Number of Scans        | 16              |
| 5 Receiver Gain          | 9               |
| 6 Relaxation Delay       | 1.0000          |
| 7 Pulse Width            | 15.0000         |
| 8 Spectrometer Frequency | 400.13          |
| 9 Nucleus                | <sup>1</sup> H  |

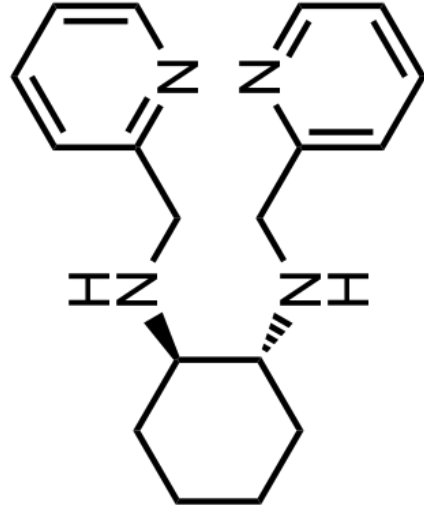

**S11**

05

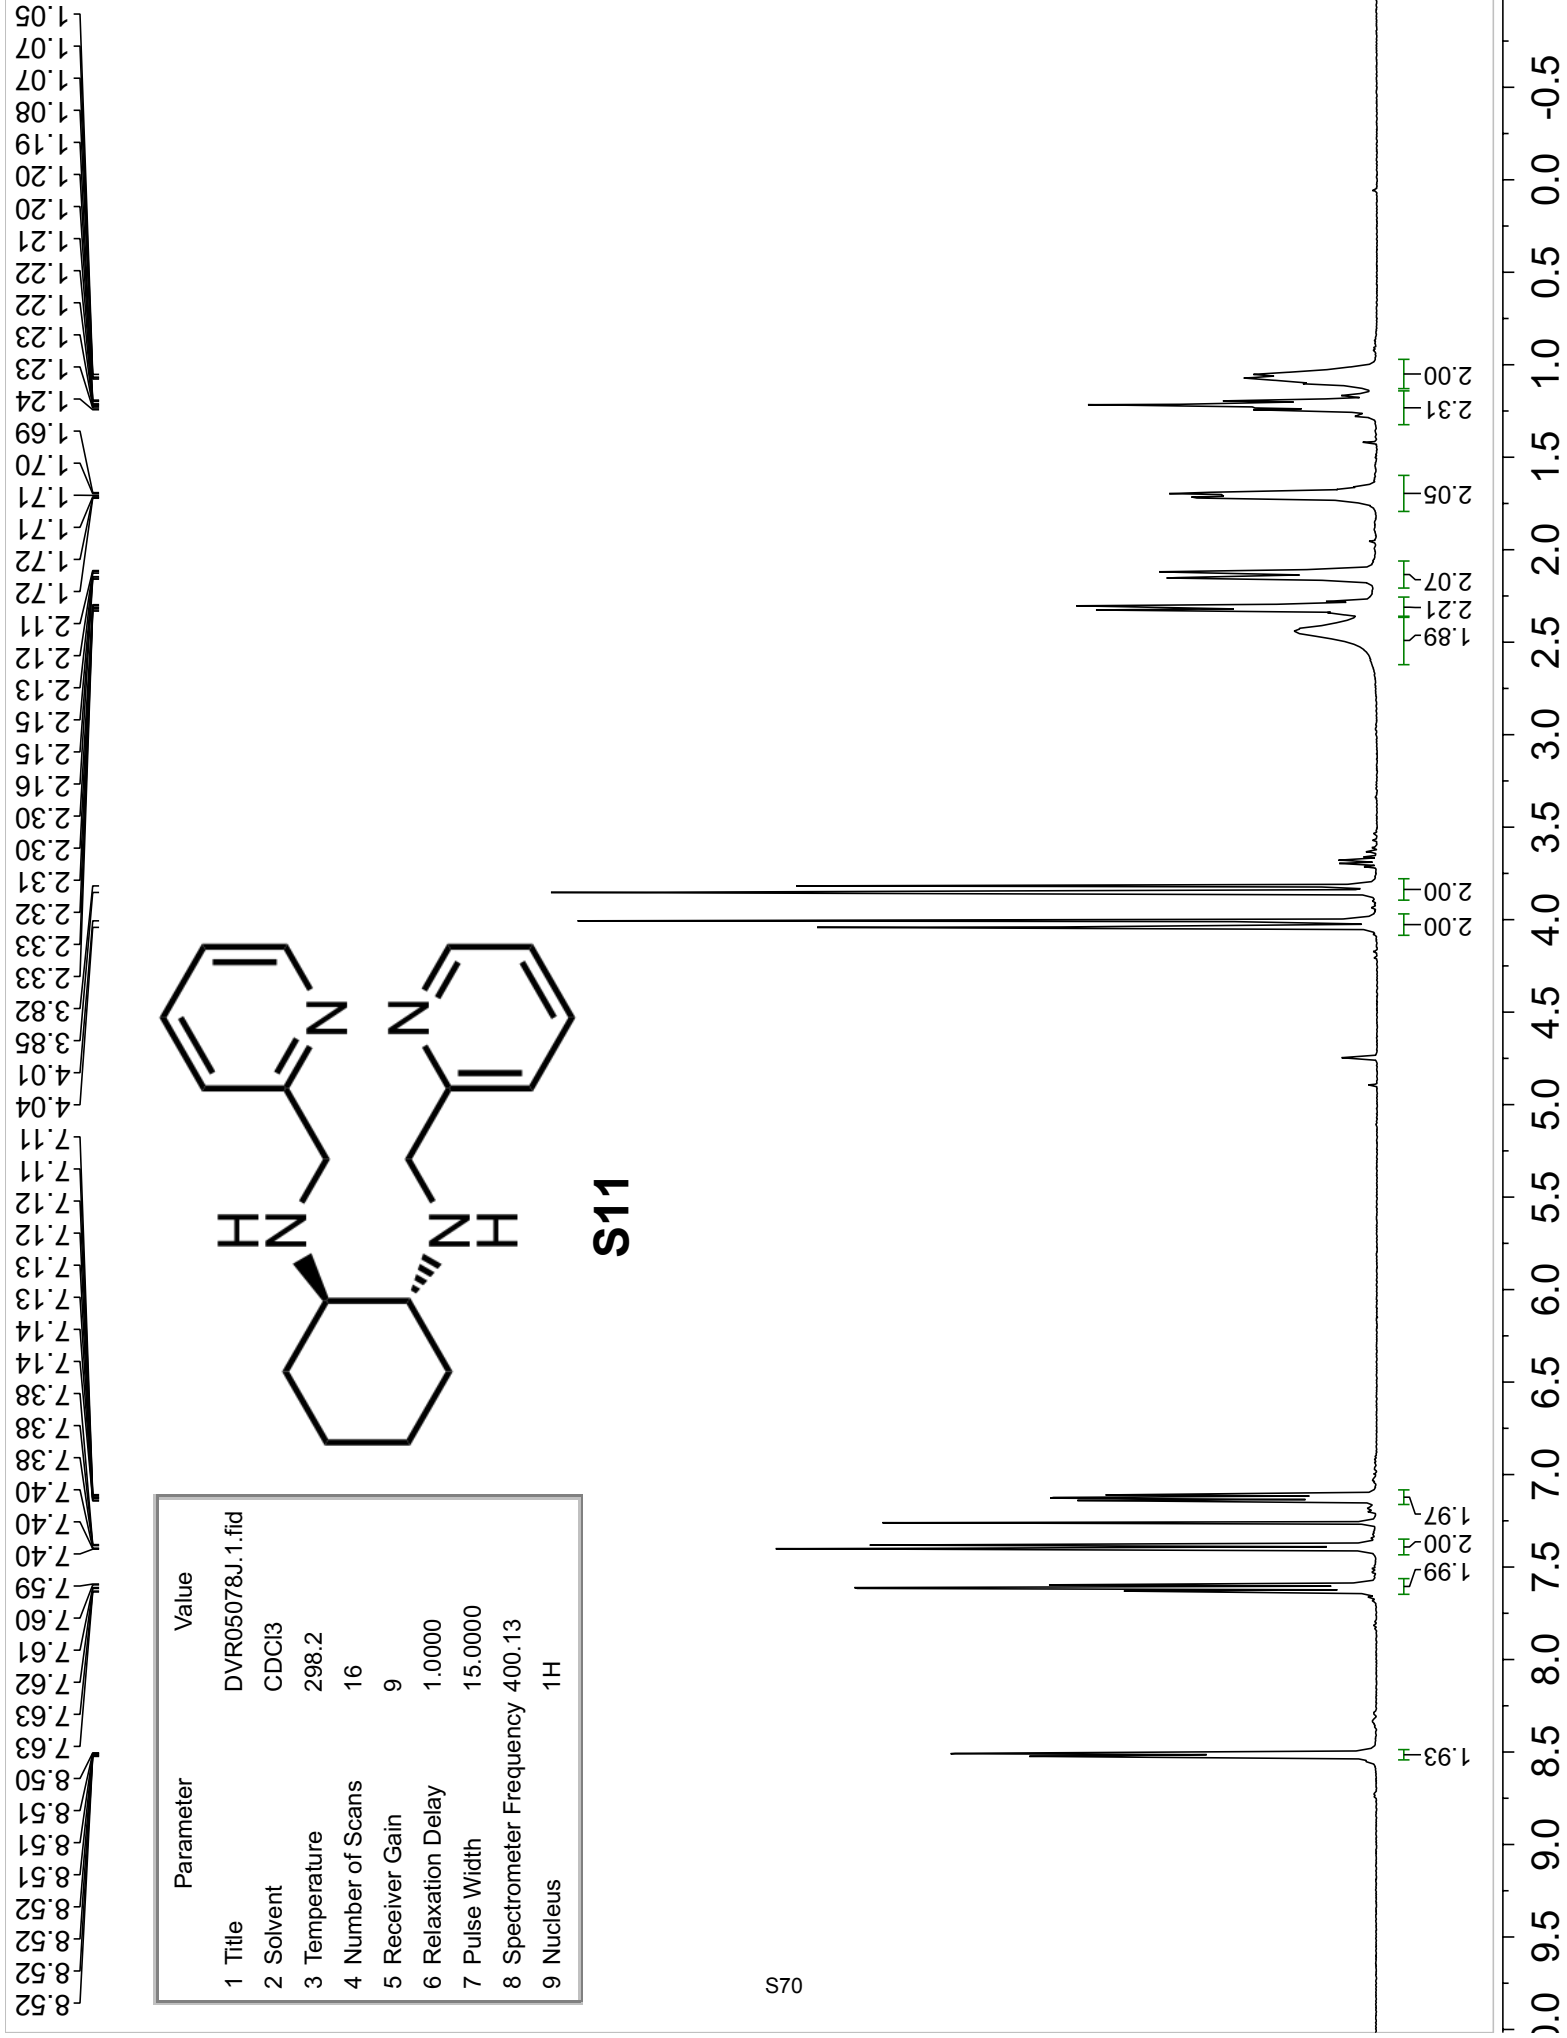

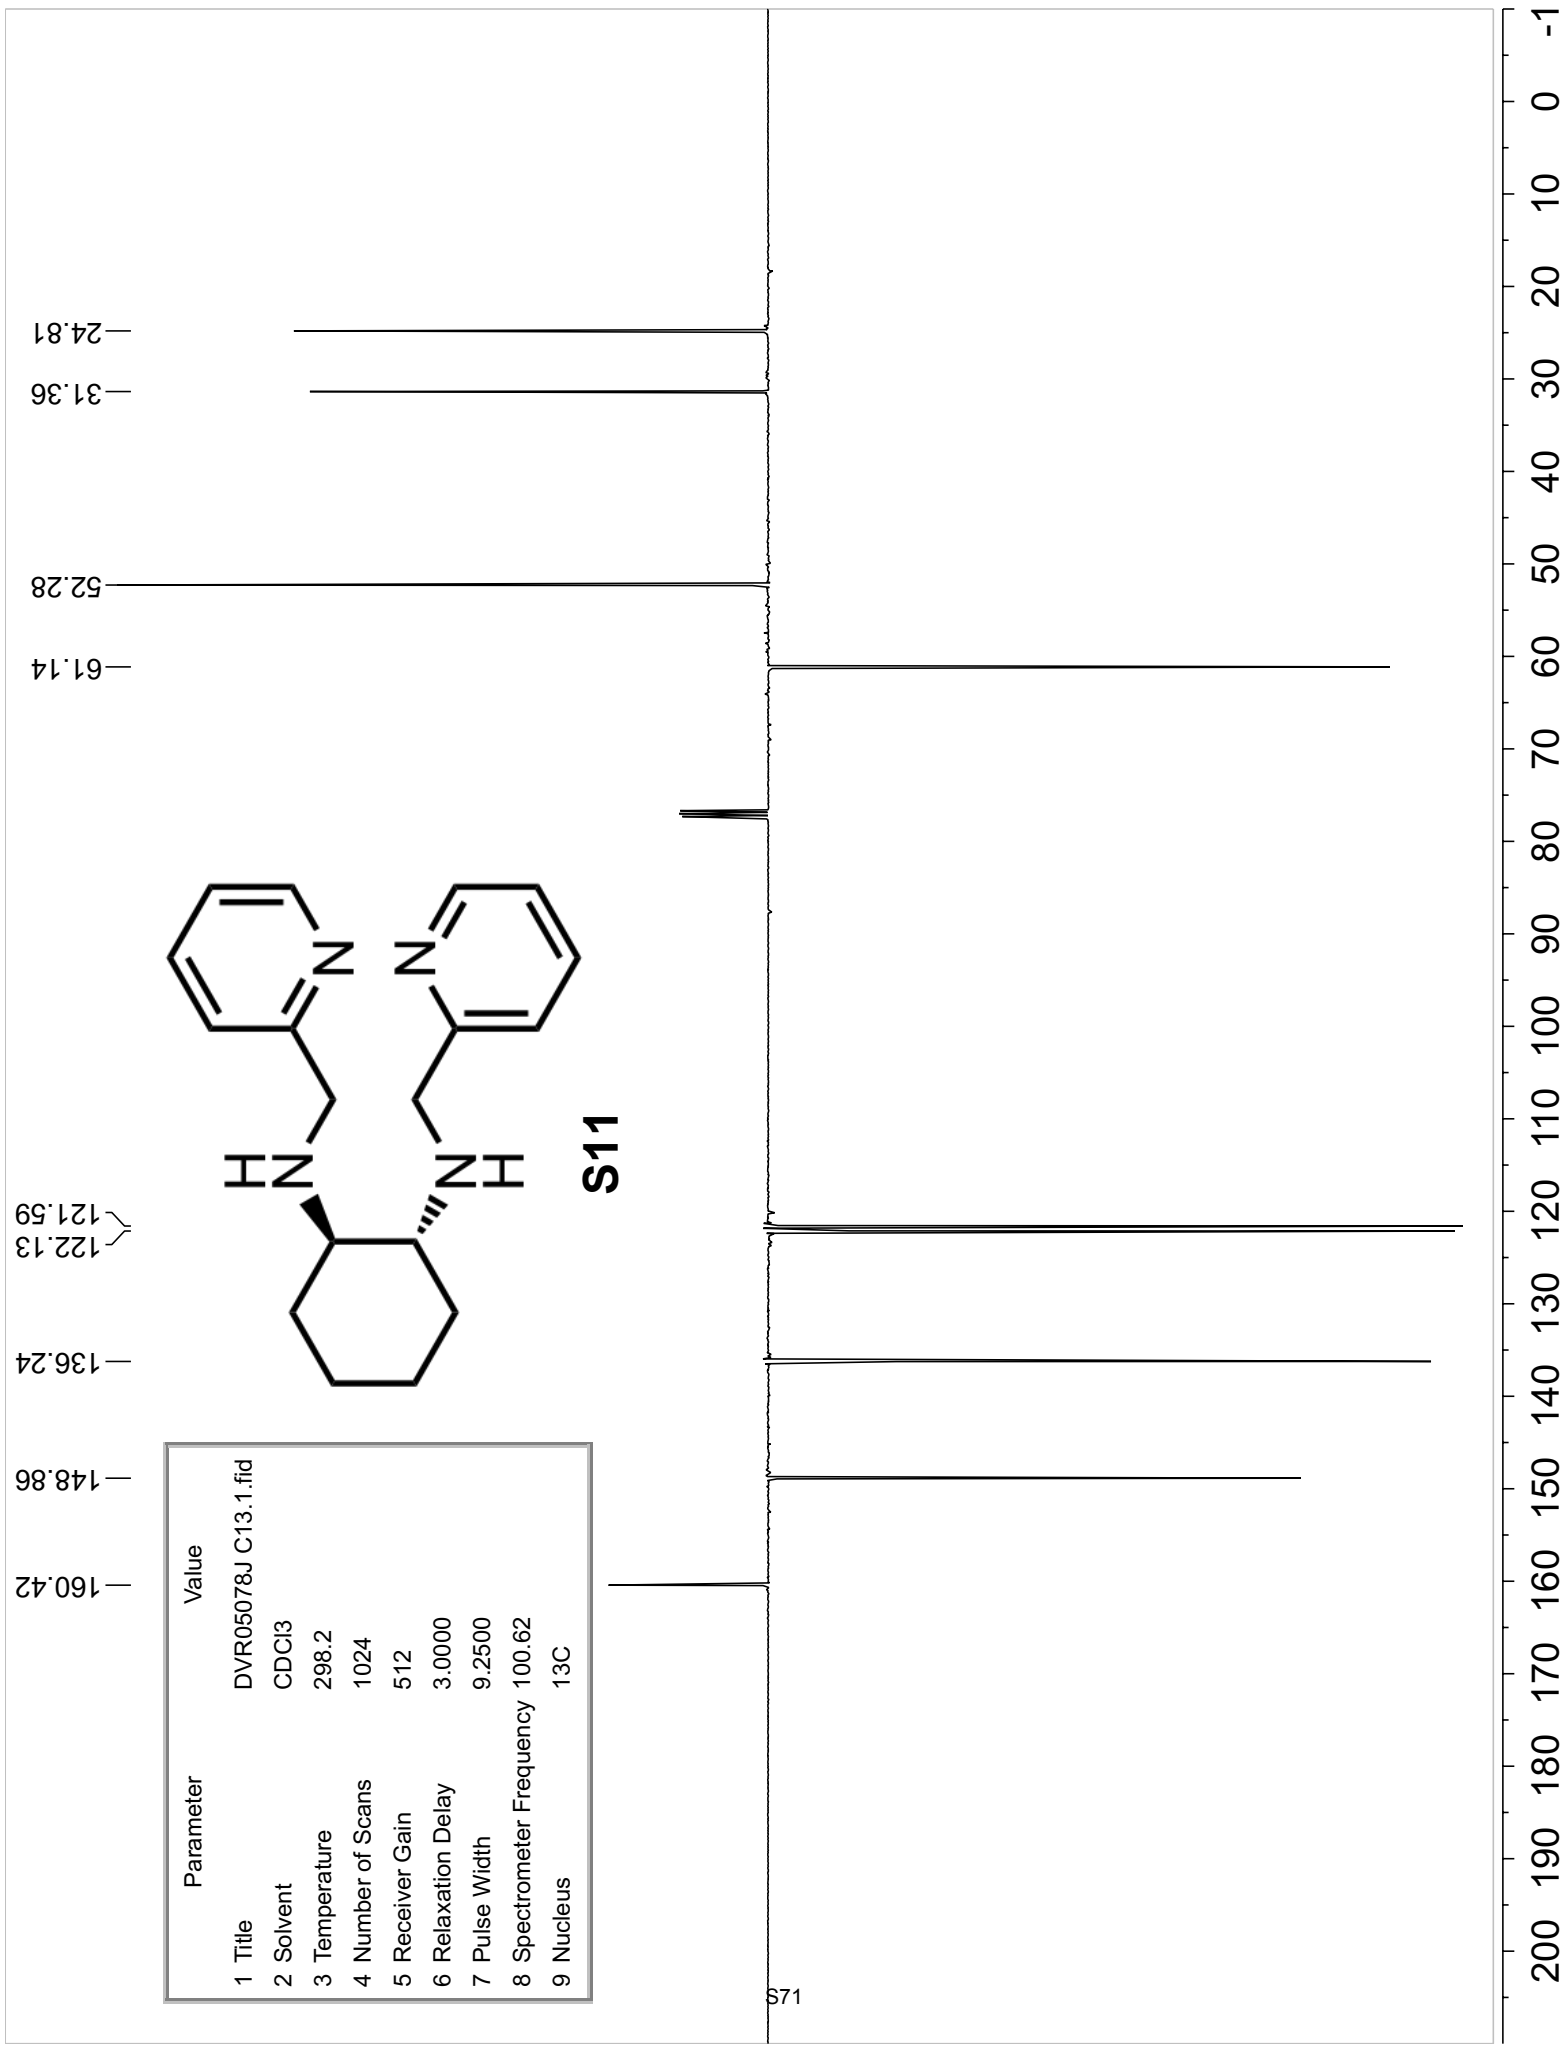

| Parameter                | Value           |
|--------------------------|-----------------|
| 1 Title                  | DVR05078K.1.fid |
| 2 Solvent                | CDCl3           |
| 3 Temperature            | 298.2           |
| 4 Number of Scans        | 16              |
| 5 Receiver Gain          | 8               |
| 6 Relaxation Delay       | 1.0000          |
| 7 Pulse Width            | 15.0000         |
| 8 Spectrometer Frequency | 400.13          |
| 9 Nucleus                | <sup>1</sup> H  |

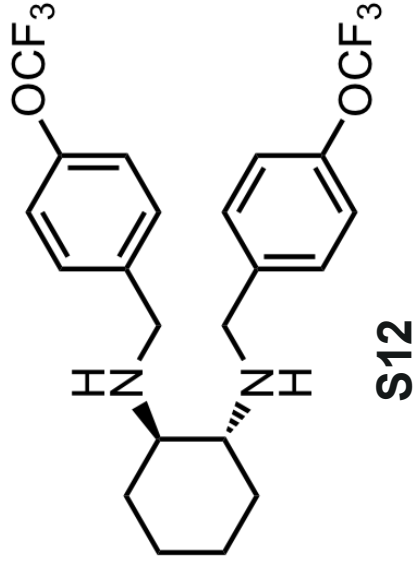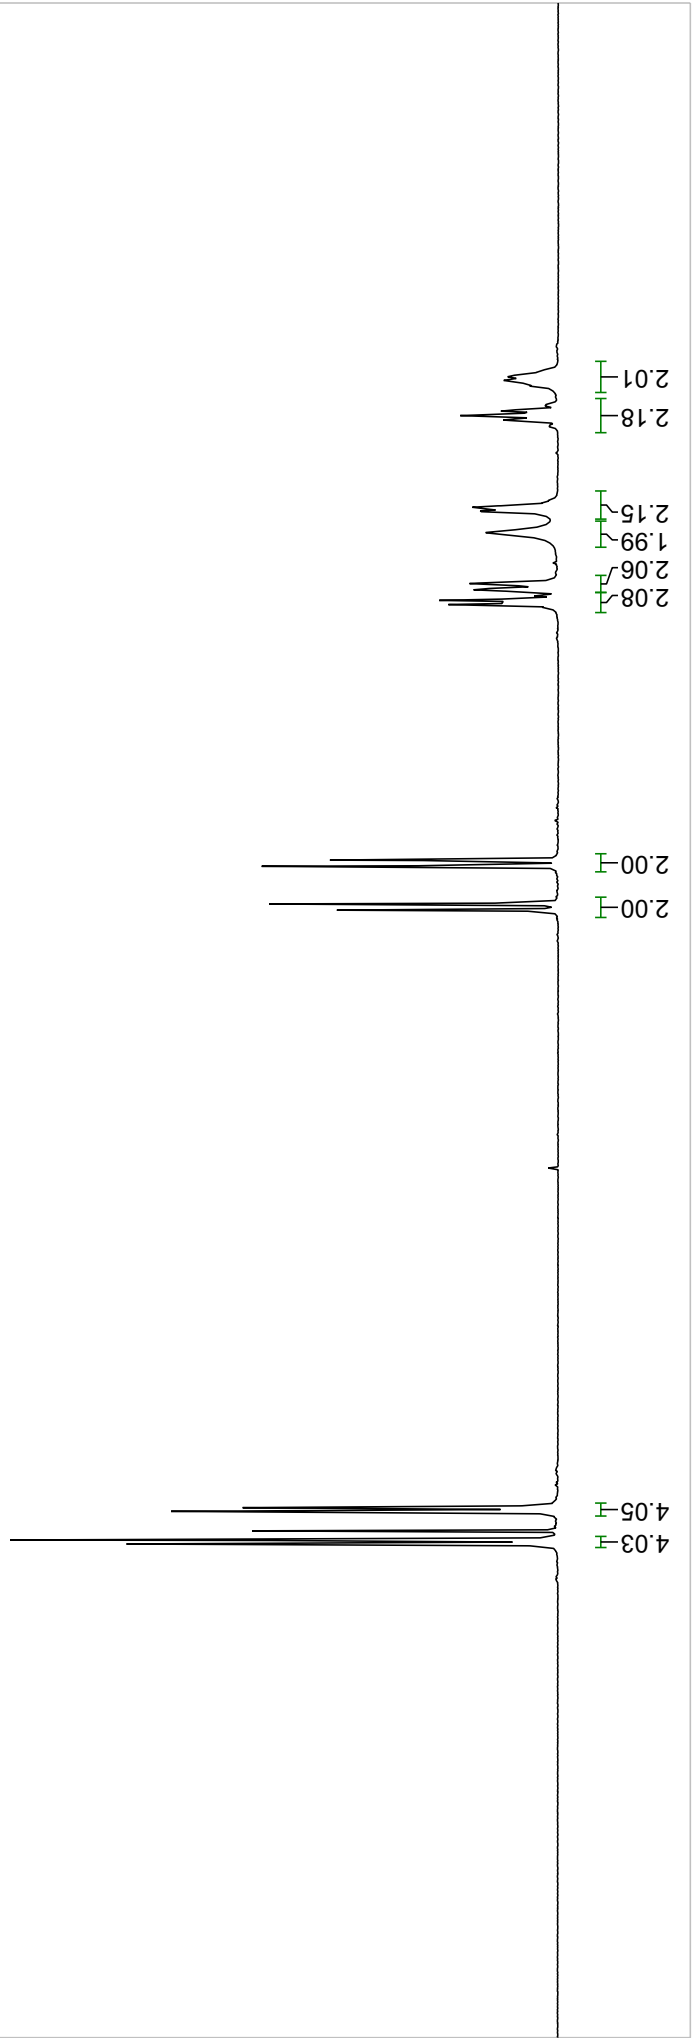

147.98  
 139.75  
 129.20  
 124.27  
 121.72  
 120.84  
 119.17  
 116.61  
 60.93  
 50.07  
 31.49  
 24.91

| Parameter                | Value               |
|--------------------------|---------------------|
| 1 Title                  | DVR05078K C13.1.fid |
| 2 Solvent                | CDCl3               |
| 3 Temperature            | 298.2               |
| 4 Number of Scans        | 1024                |
| 5 Receiver Gain          | 512                 |
| 6 Relaxation Delay       | 3.0000              |
| 7 Pulse Width            | 9.2500              |
| 8 Spectrometer Frequency | 100.62              |
| 9 Nucleus                | <sup>13</sup> C     |

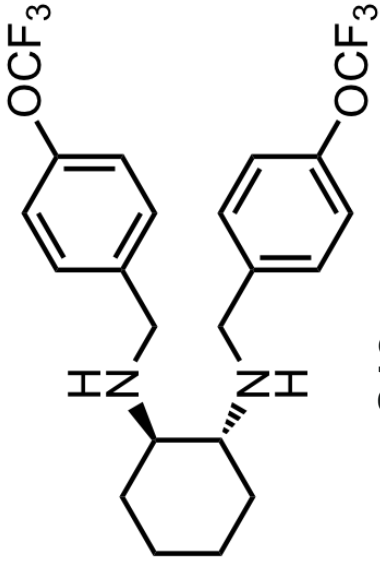

**S12**

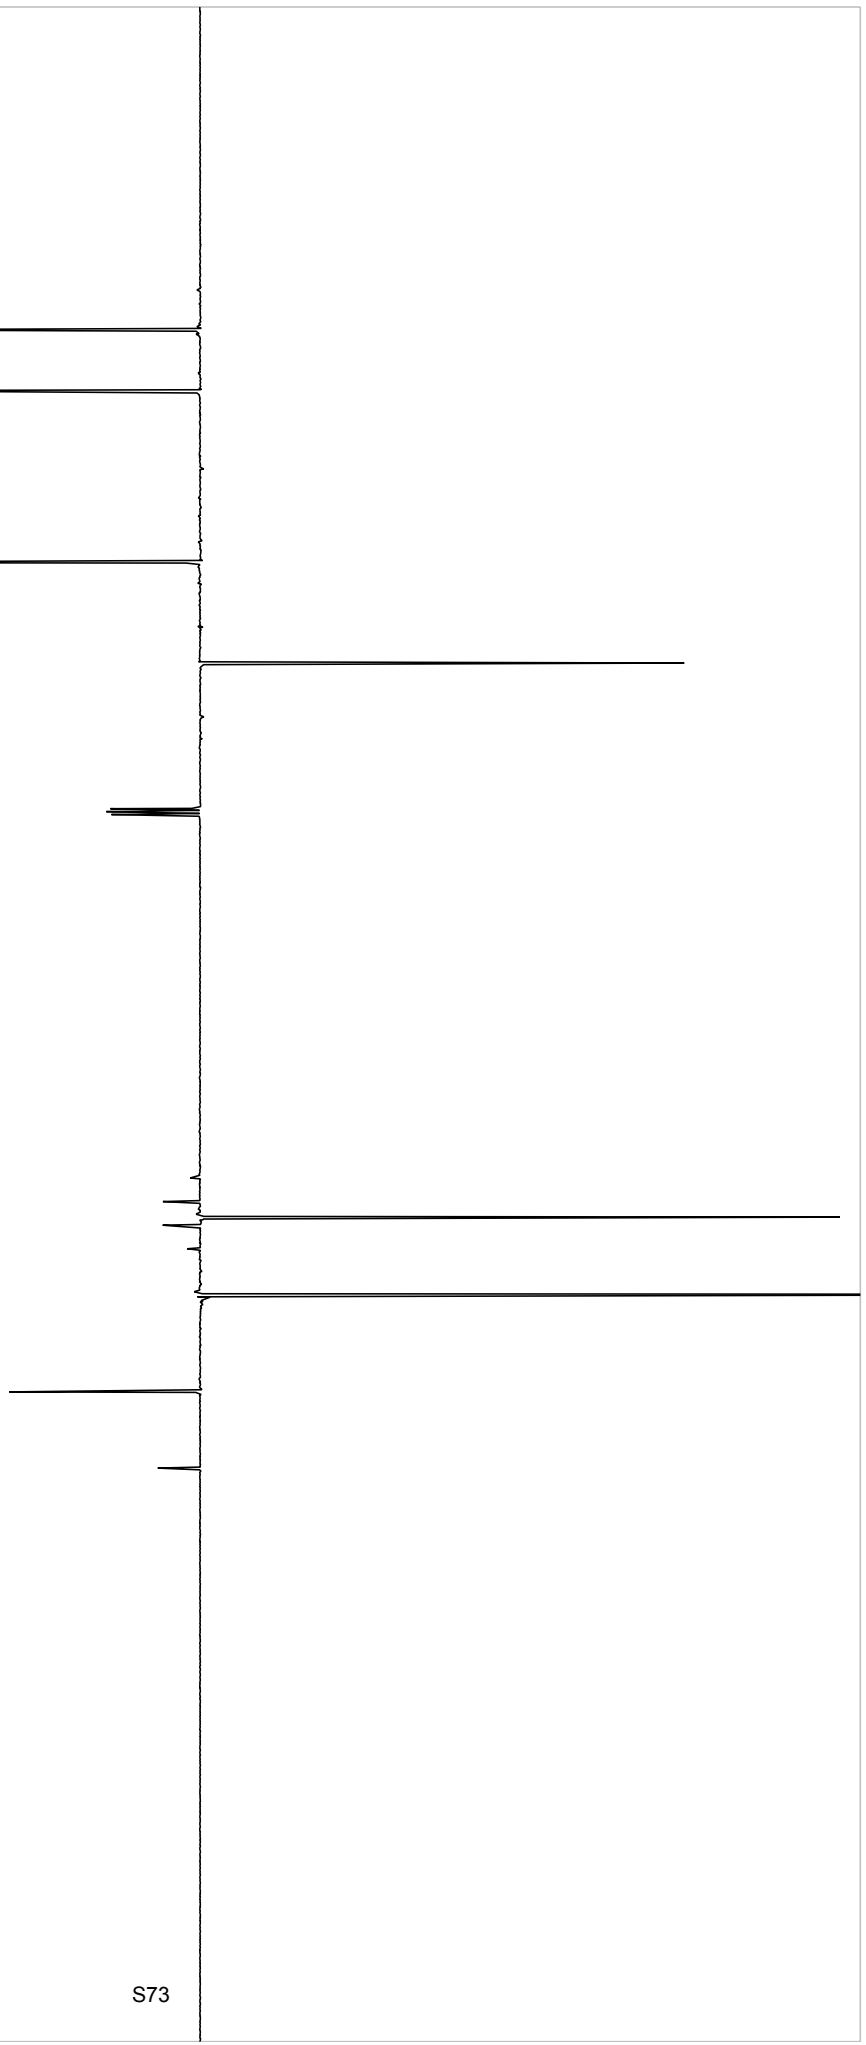

200 190 180 170 160 150 140 130 120 110 100 90 80 70 60 50 40 30 20 10 0 -1

-57.93

| Parameter                | Value               |
|--------------------------|---------------------|
| 1 Title                  | DVR05078K F19.1.fid |
| 2 Solvent                | CDCl3               |
| 3 Temperature            | 297.5               |
| 4 Number of Scans        | 16                  |
| 5 Receiver Gain          | 181                 |
| 6 Relaxation Delay       | 3.0000              |
| 7 Pulse Width            | 11.6000             |
| 8 Spectrometer Frequency | 564.81              |
| 9 Nucleus                | 19F                 |

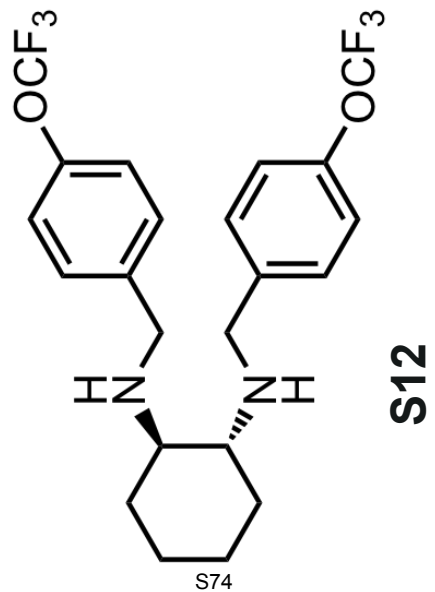

0 -5 -10 -15 -20 -25 -30 -35 -40 -45 -50 -55 -60 -65 -70 -75 -80 -85 -90 -95 -100



| Parameter                | Value           |
|--------------------------|-----------------|
| 1 Title                  | DVR05078L.1.fid |
| 2 Solvent                | CDCl3           |
| 3 Temperature            | 298.2           |
| 4 Number of Scans        | 16              |
| 5 Receiver Gain          | 10              |
| 6 Relaxation Delay       | 1.0000          |
| 7 Pulse Width            | 15.0000         |
| 8 Spectrometer Frequency | 400.13          |
| 9 Nucleus                | <sup>1</sup> H  |

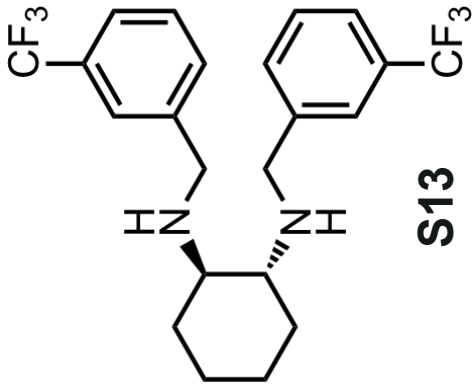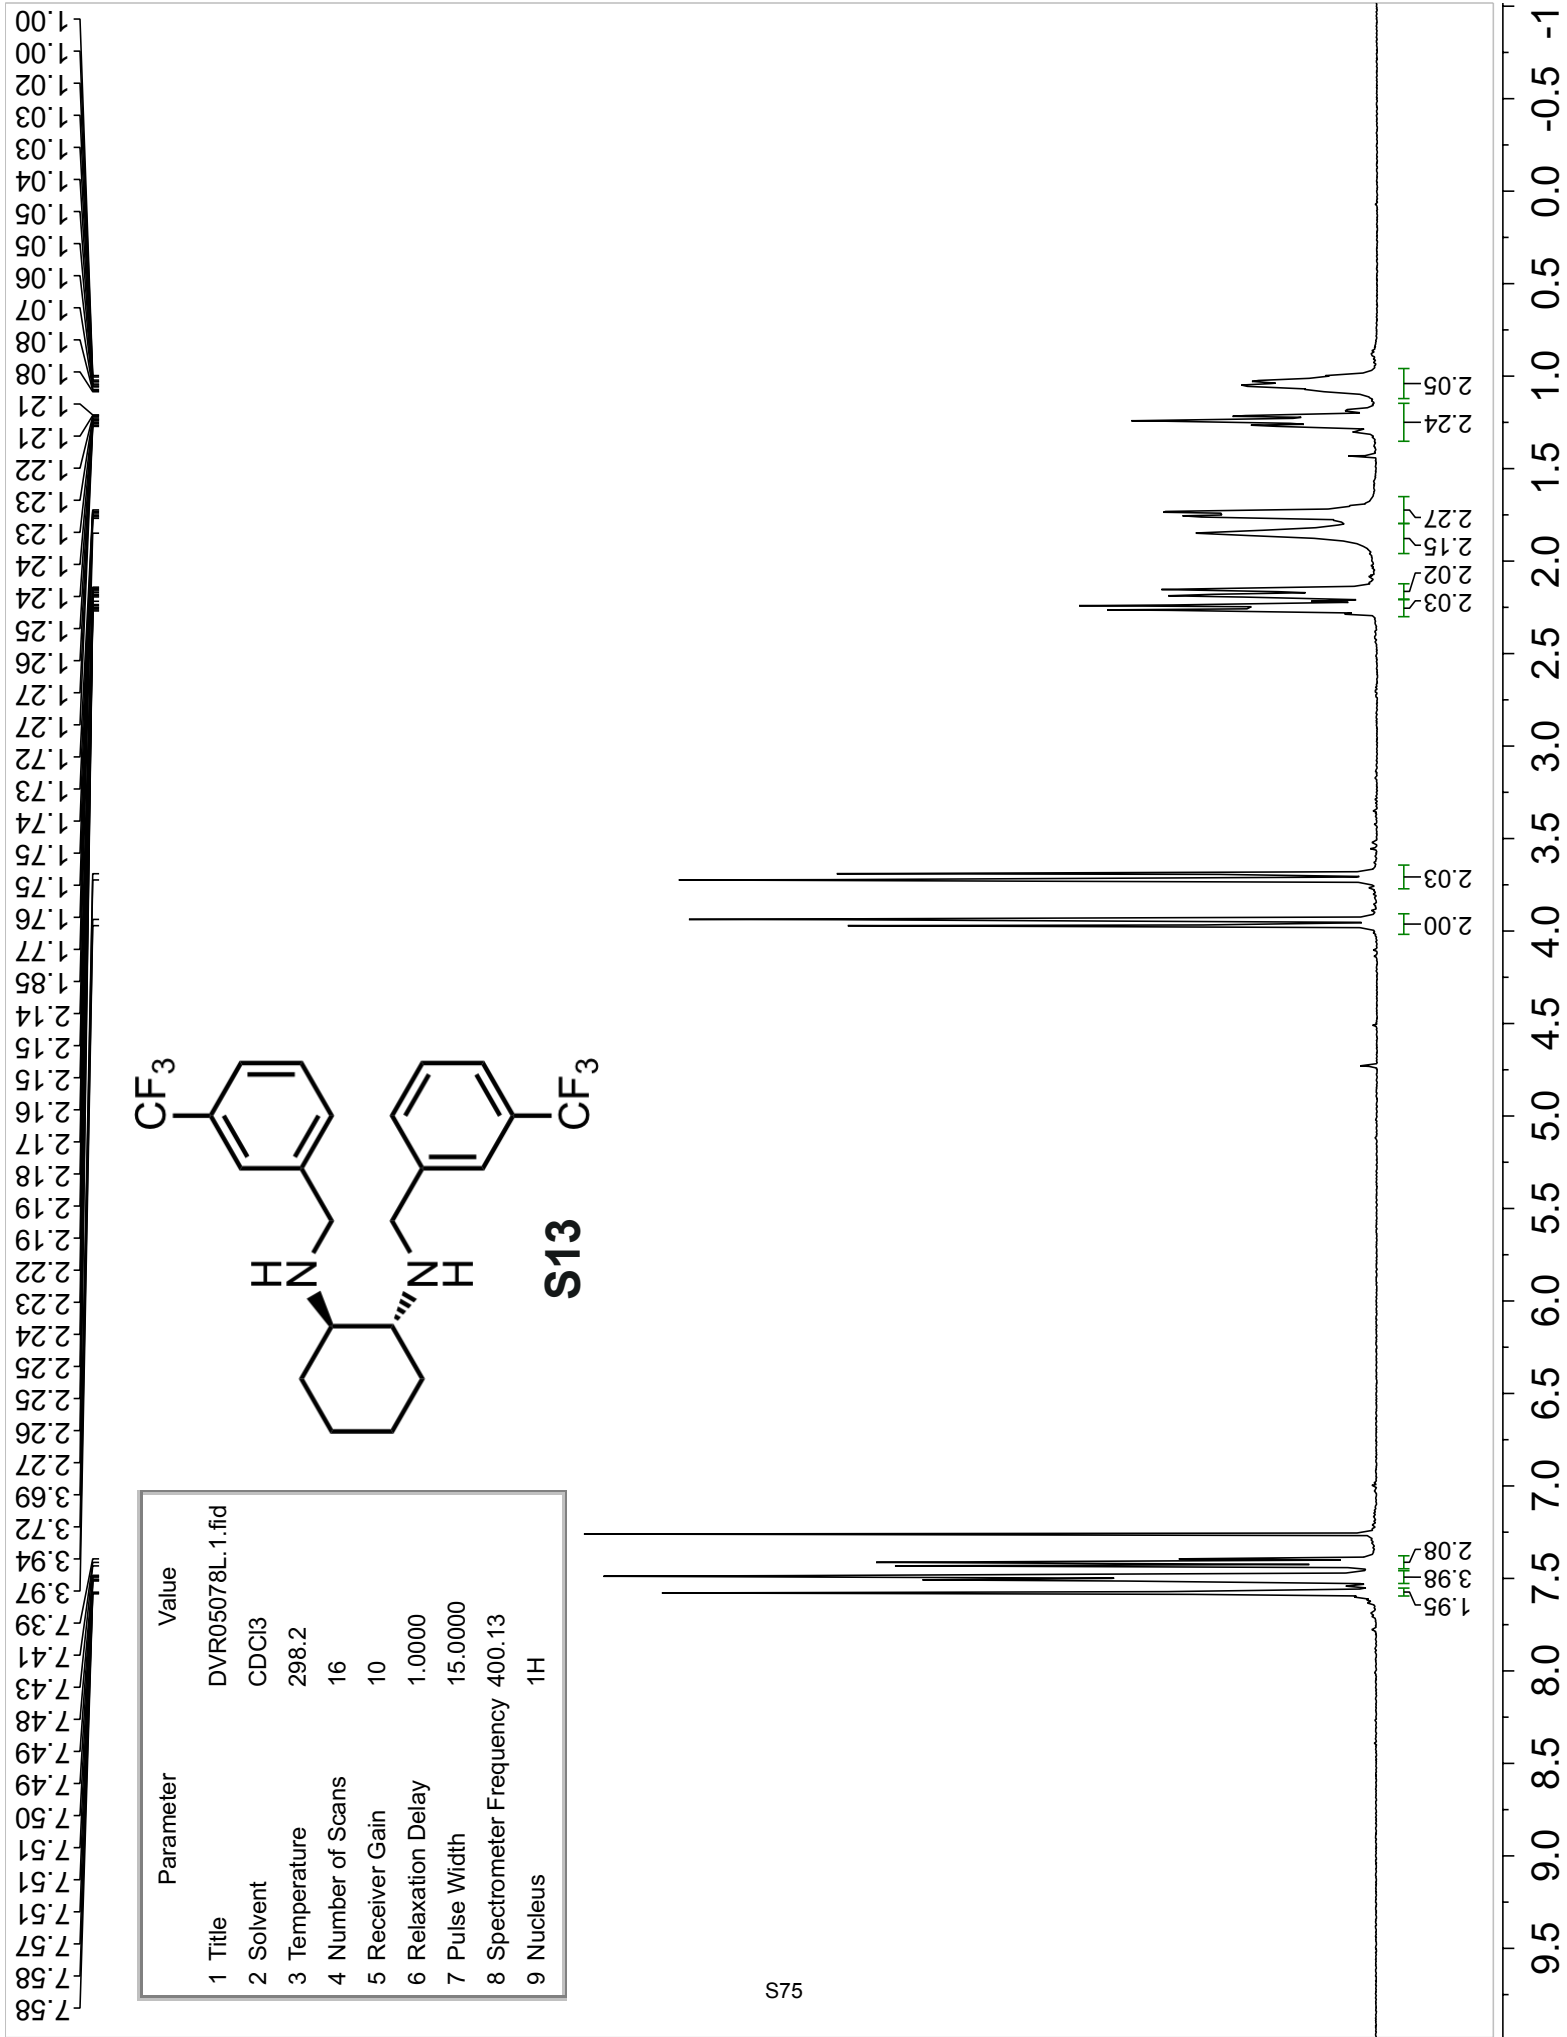

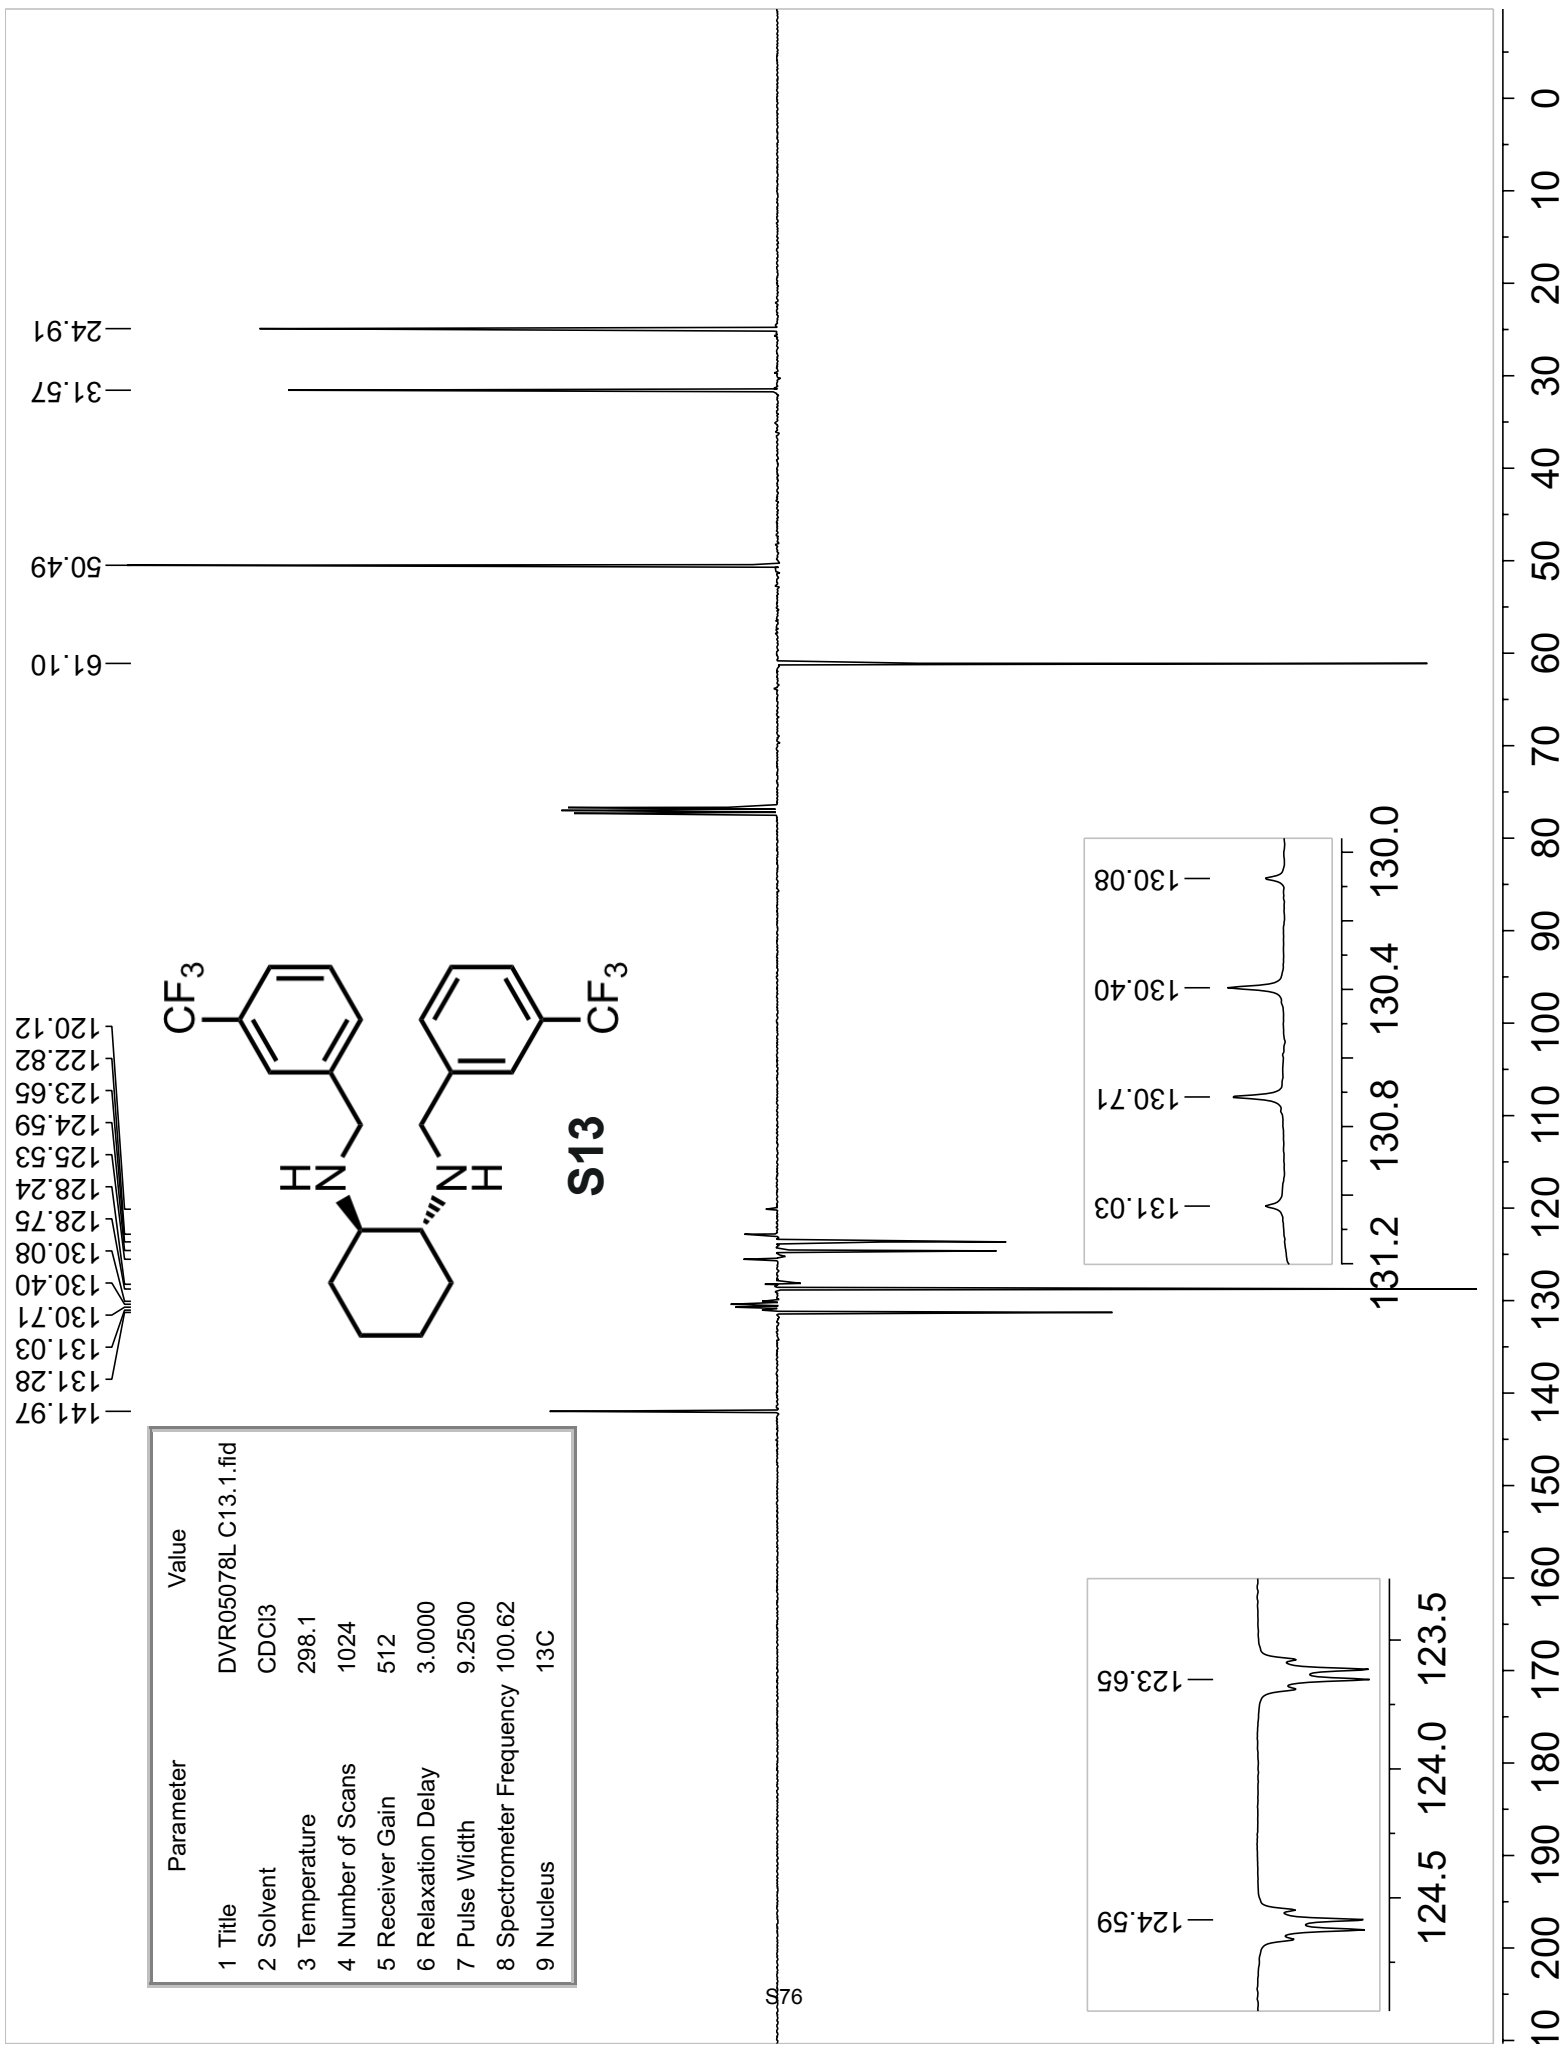

| Parameter                | Value               |
|--------------------------|---------------------|
| 1 Title                  | DVR05078L C13.1.fid |
| 2 Solvent                | CDCl3               |
| 3 Temperature            | 298.1               |
| 4 Number of Scans        | 1024                |
| 5 Receiver Gain          | 512                 |
| 6 Relaxation Delay       | 3.0000              |
| 7 Pulse Width            | 9.2500              |
| 8 Spectrometer Frequency | 100.62              |
| 9 Nucleus                | <sup>13</sup> C     |

141.97  
131.28  
131.03  
130.71  
130.40  
130.08  
128.75  
128.24  
125.53  
124.59  
123.65  
122.82  
120.12

61.10  
50.49  
31.57  
24.91

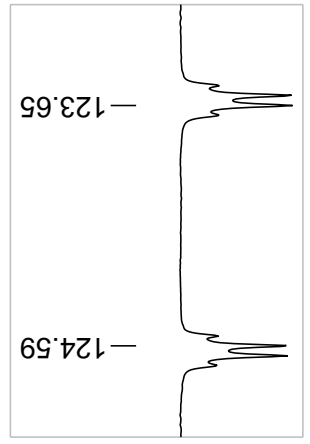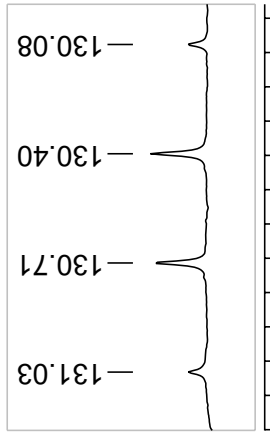

131.2 130.8 130.4 130.0

124.5 124.0 123.5

10 20 30 40 50 60 70 80 90 100 110 120 130 140 150 160 170 180 190 200

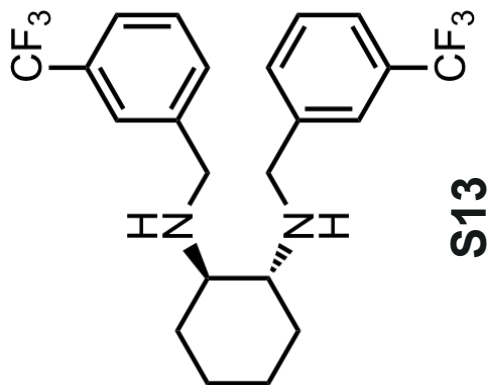

| Parameter                | Value               |
|--------------------------|---------------------|
| 1 Title                  | DVR05078L F19.1.fid |
| 2 Solvent                | CDCl3               |
| 3 Temperature            | 297.4               |
| 4 Number of Scans        | 16                  |
| 5 Receiver Gain          | 203                 |
| 6 Relaxation Delay       | 3.0000              |
| 7 Pulse Width            | 11.6000             |
| 8 Spectrometer Frequency | 564.81              |
| 9 Nucleus                | 19F                 |

| Parameter                | Value           |
|--------------------------|-----------------|
| 1 Title                  | DVR05078M.1.fid |
| 2 Solvent                | CDCl3           |
| 3 Temperature            | 298.2           |
| 4 Number of Scans        | 16              |
| 5 Receiver Gain          | 9               |
| 6 Relaxation Delay       | 1.0000          |
| 7 Pulse Width            | 15.0000         |
| 8 Spectrometer Frequency | 400.13          |
| 9 Nucleus                | <sup>1</sup> H  |

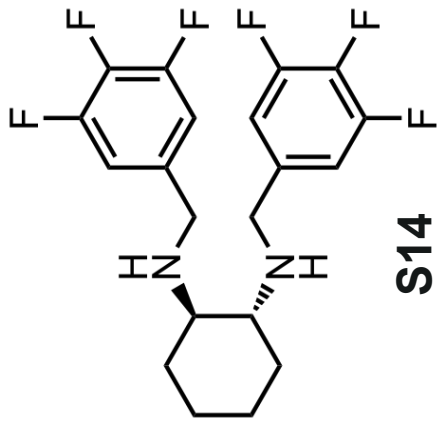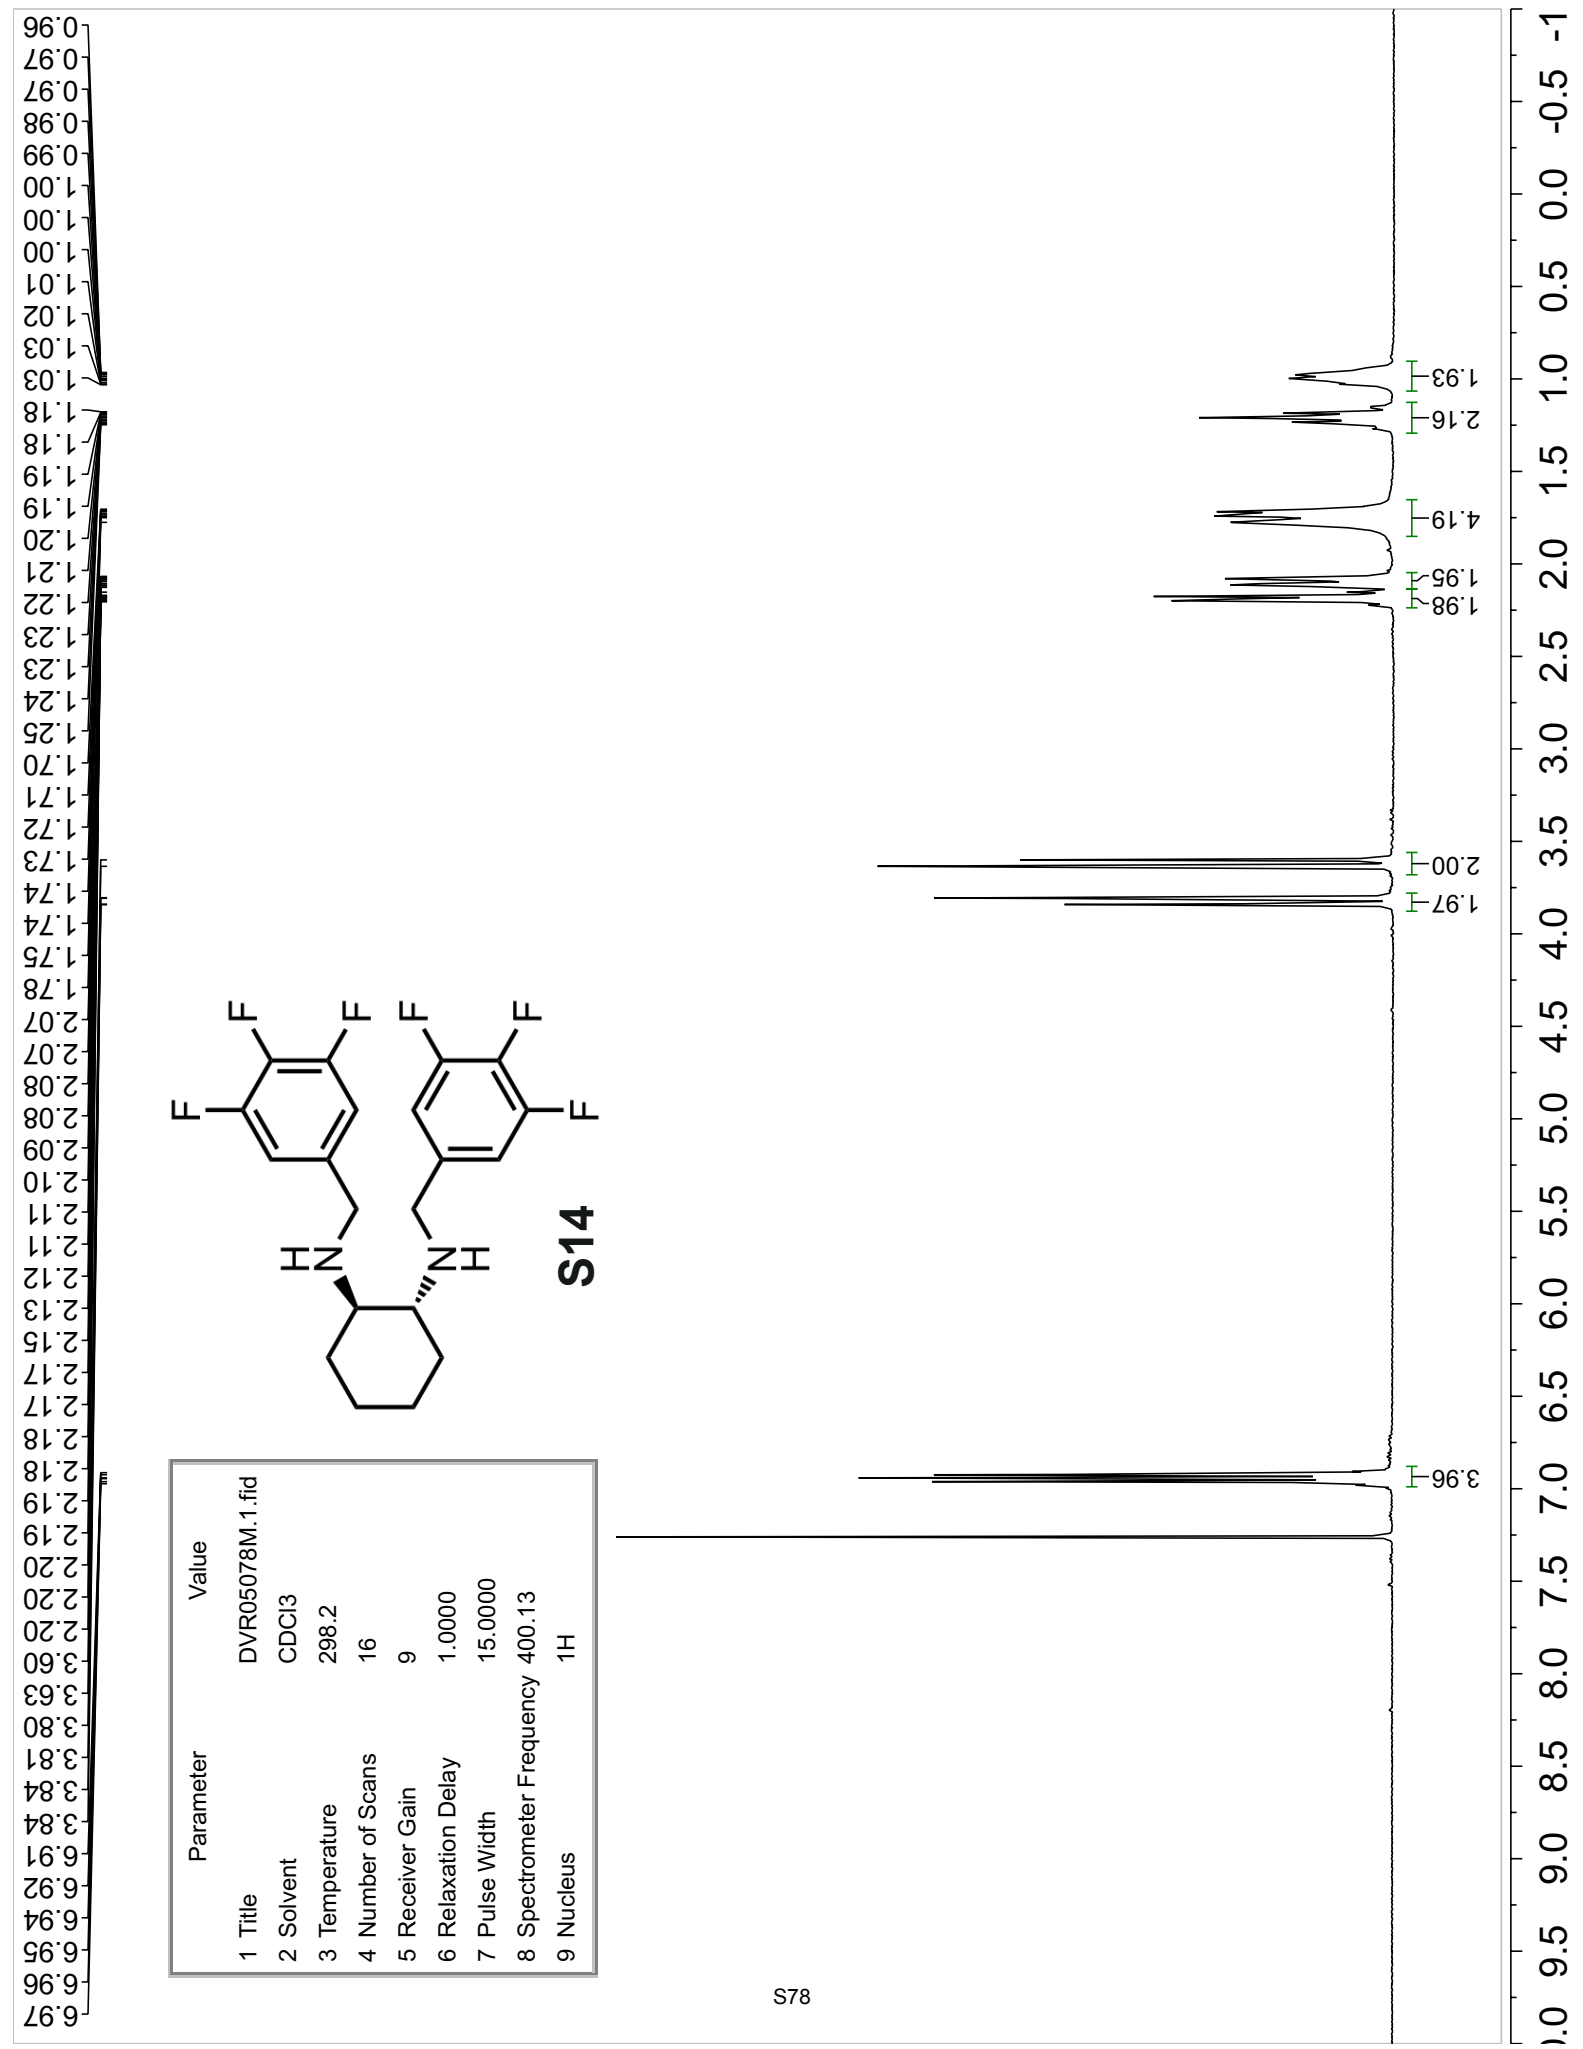

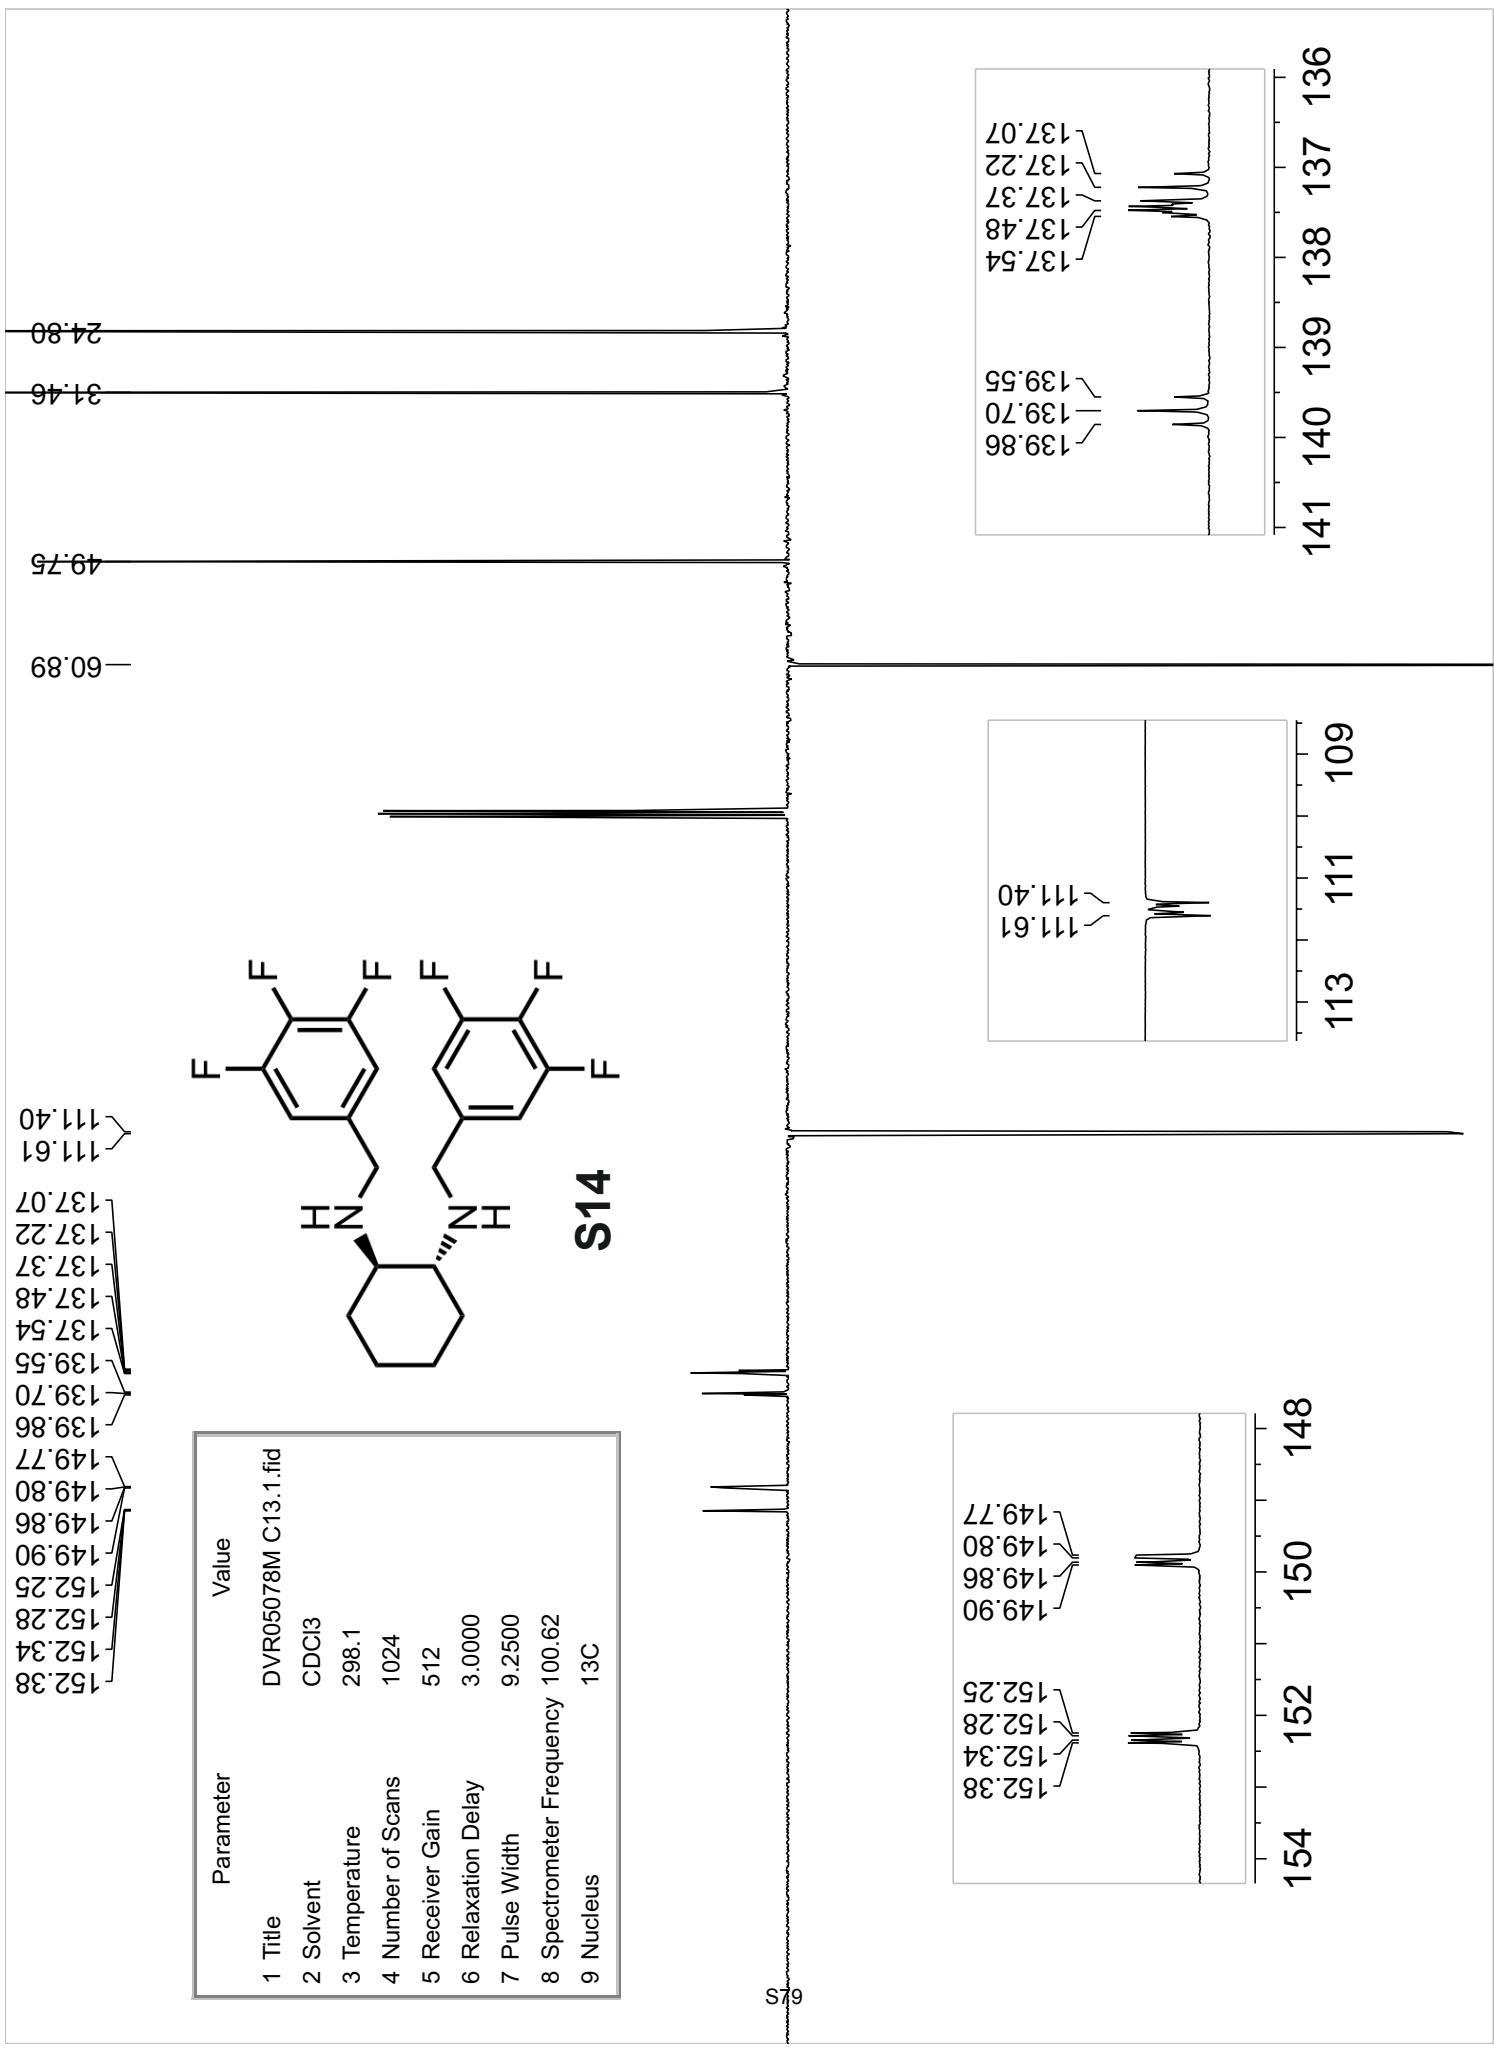

| Parameter                | Value               |
|--------------------------|---------------------|
| 1 Title                  | DVR05078M C13.1.fid |
| 2 Solvent                | CDCI3               |
| 3 Temperature            | 298.1               |
| 4 Number of Scans        | 1024                |
| 5 Receiver Gain          | 512                 |
| 6 Relaxation Delay       | 3.0000              |
| 7 Pulse Width            | 9.2500              |
| 8 Spectrometer Frequency | 100.62              |
| 9 Nucleus                | <sup>13</sup> C     |

- 152.38
- 152.34
- 152.28
- 152.25
- 149.90
- 149.86
- 149.80
- 149.77
- 139.86
- 139.70
- 139.55
- 137.54
- 137.48
- 137.37
- 137.22
- 137.07
- 111.61
- 111.40

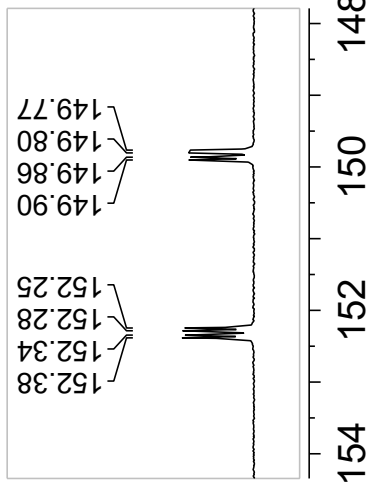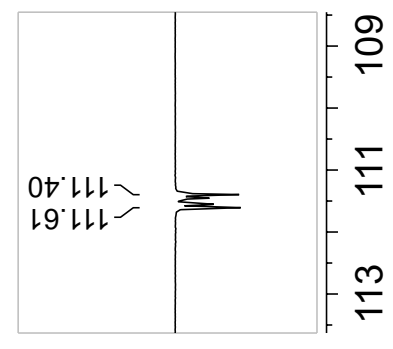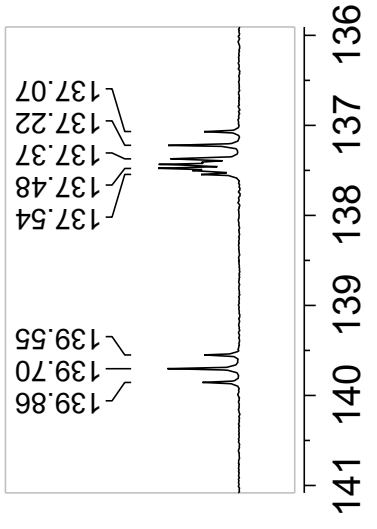

200 190 180 170 160 150 148 140 130 120 110 100 90 80 70 60 50 40 30 20 10 0 -1

| Parameter                | Value               |
|--------------------------|---------------------|
| 1 Title                  | DVR05078M F19.1.fid |
| 2 Solvent                | CDCI3               |
| 3 Temperature            | 297.4               |
| 4 Number of Scans        | 16                  |
| 5 Receiver Gain          | 287                 |
| 6 Relaxation Delay       | 3.0000              |
| 7 Pulse Width            | 11.6000             |
| 8 Spectrometer Frequency | 564.81              |
| 9 Nucleus                | <sup>19</sup> F     |

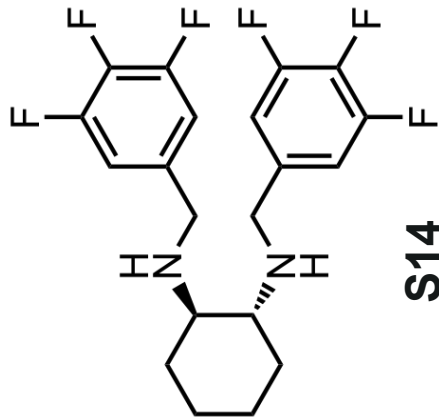

-163.07  
-163.10  
-163.14

-134.73  
-134.77

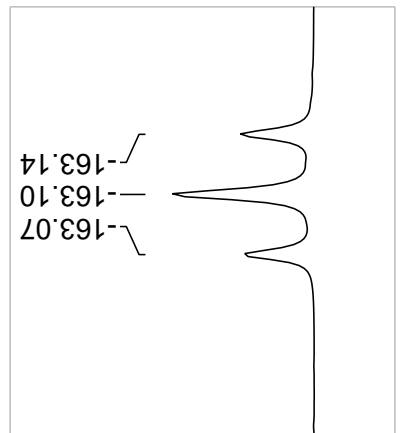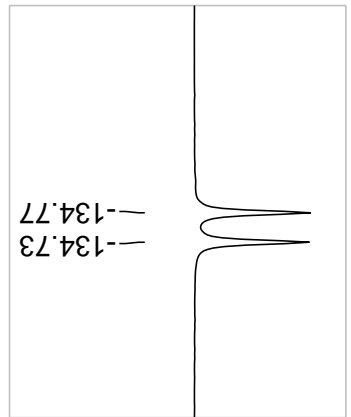

-163.00 -163.10 -163.20 -134.6 -134.8 -135.0

10 0 -10 -20 -30 -40 -50 -60 -70 -80 -90 -100 -110 -120 -130 -140 -150 -160 -170 -180 -190 -200 -210

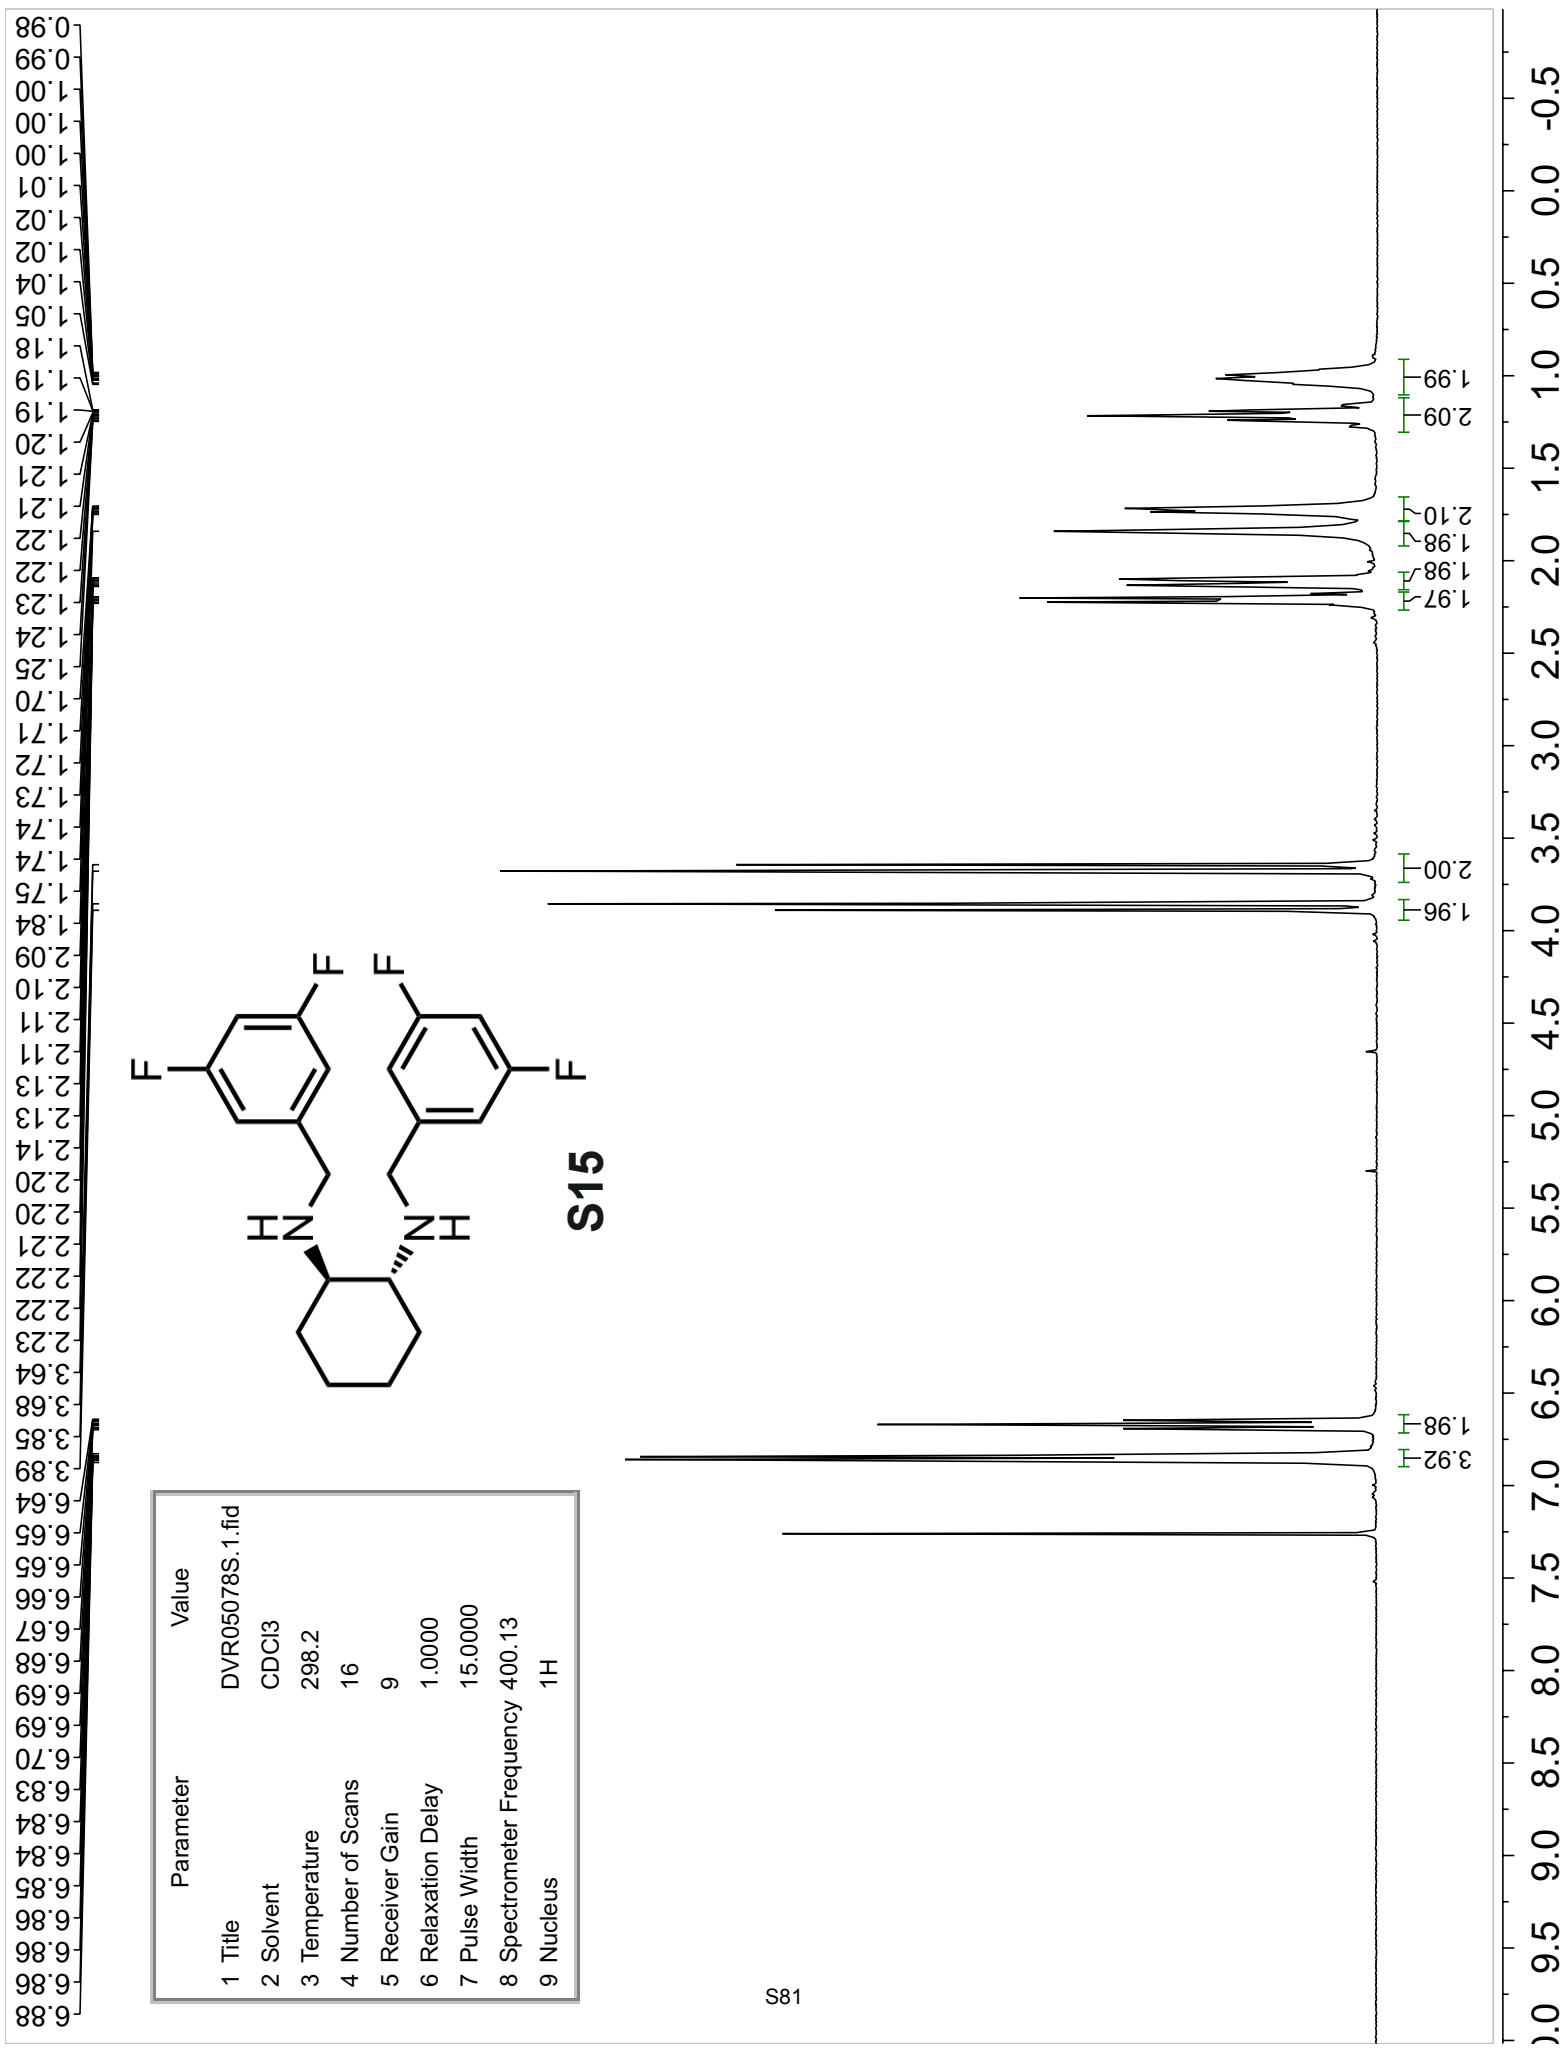

| Parameter                | Value           |
|--------------------------|-----------------|
| 1 Title                  | DVR05078S.1.fid |
| 2 Solvent                | CDCl3           |
| 3 Temperature            | 298.2           |
| 4 Number of Scans        | 16              |
| 5 Receiver Gain          | 9               |
| 6 Relaxation Delay       | 1.0000          |
| 7 Pulse Width            | 15.0000         |
| 8 Spectrometer Frequency | 400.13          |
| 9 Nucleus                | 1H              |

**S15**

164.26  
164.13  
161.79  
161.67  
145.34  
145.26  
145.17

110.54  
110.47  
110.35  
110.29  
102.32  
102.06  
101.81

60.83  
50.07  
31.45  
24.82

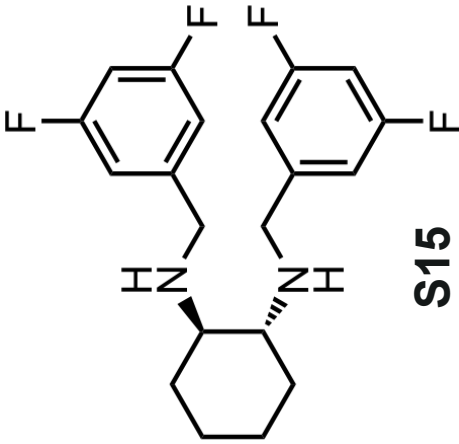

| Parameter                | Value               |
|--------------------------|---------------------|
| 1 Title                  | DVR05078S C13.1.fid |
| 2 Solvent                | CDCl3               |
| 3 Temperature            | 298.2               |
| 4 Number of Scans        | 1024                |
| 5 Receiver Gain          | 512                 |
| 6 Relaxation Delay       | 3.0000              |
| 7 Pulse Width            | 9.2500              |
| 8 Spectrometer Frequency | 100.62              |
| 9 Nucleus                | 13C                 |

289

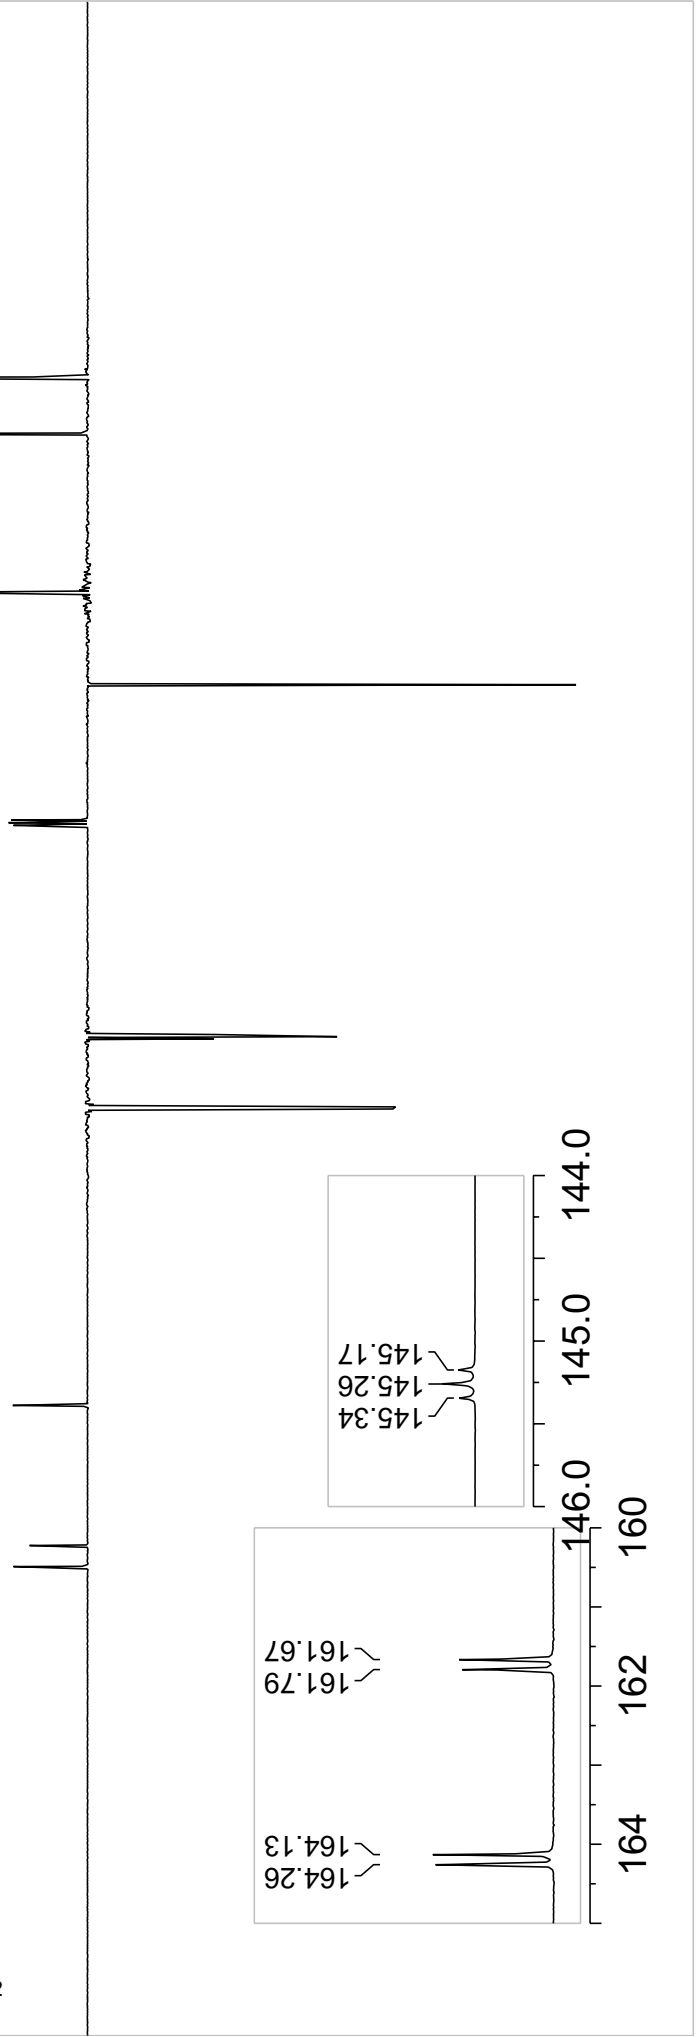



| Parameter                | Value               |
|--------------------------|---------------------|
| 1 Title                  | DVR05078S F19.1.fid |
| 2 Solvent                | CDCI3               |
| 3 Temperature            | 297.4               |
| 4 Number of Scans        | 16                  |
| 5 Receiver Gain          | 203                 |
| 6 Relaxation Delay       | 3.0000              |
| 7 Pulse Width            | 11.6000             |
| 8 Spectrometer Frequency | 564.81              |
| 9 Nucleus                | 19F                 |

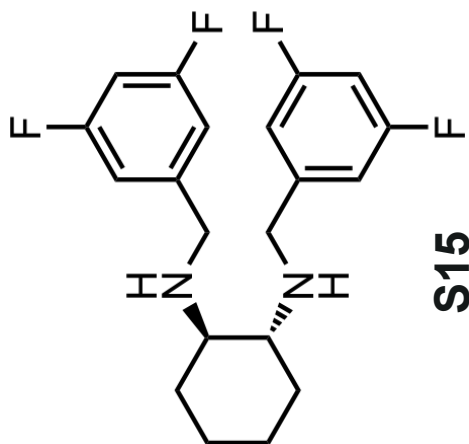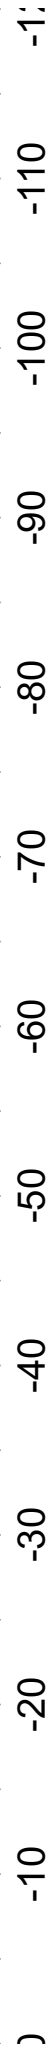

1.05  
1.06  
1.06  
1.07  
1.07  
1.07  
1.07  
1.08  
1.21  
1.21  
1.21  
1.22  
1.22  
1.23  
1.24  
1.24  
1.25  
1.25  
1.69  
1.70  
1.70  
1.71  
1.72  
1.72  
1.73  
2.06  
2.13  
2.13  
2.14  
2.15  
2.15  
2.16  
2.25  
2.25  
2.26  
2.26  
2.27  
2.27  
3.63  
3.65  
3.74  
3.89  
3.91  
6.81  
6.82  
6.83  
6.83  
6.88  
6.89  
6.90  
6.90  
6.91  
6.91  
7.19  
7.19  
7.20  
7.21  
7.22  
7.22  
7.28  
7.28  
7.29  
7.29

| Parameter                | Value              |
|--------------------------|--------------------|
| 1 Title                  | DVR05078Q H1.1.fid |
| 2 Solvent                | CDCl3              |
| 3 Temperature            | 300.0              |
| 4 Number of Scans        | 16                 |
| 5 Receiver Gain          | 57                 |
| 6 Relaxation Delay       | 1.0000             |
| 7 Pulse Width            | 10.7300            |
| 8 Spectrometer Frequency | 600.32             |
| 9 Nucleus                | 1H                 |

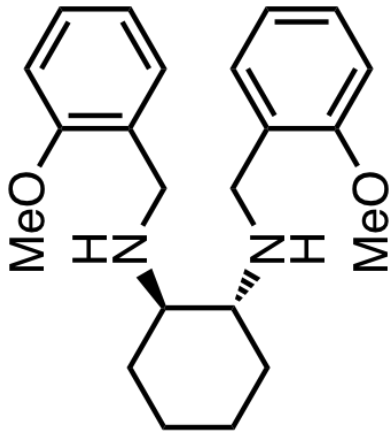

**S16**

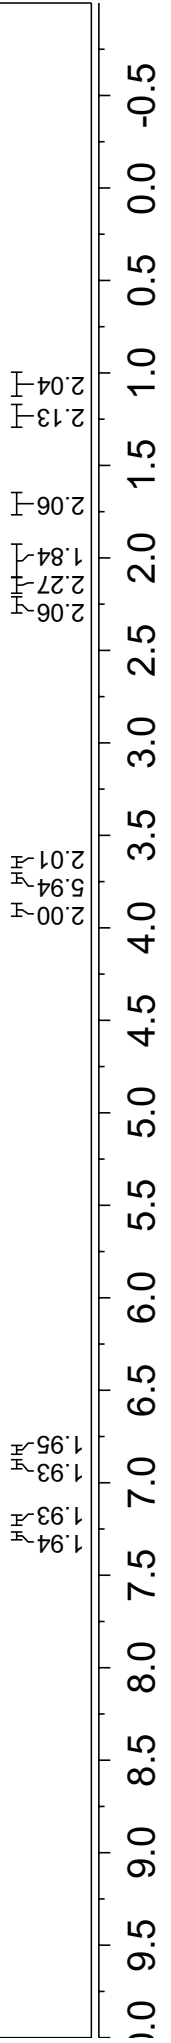

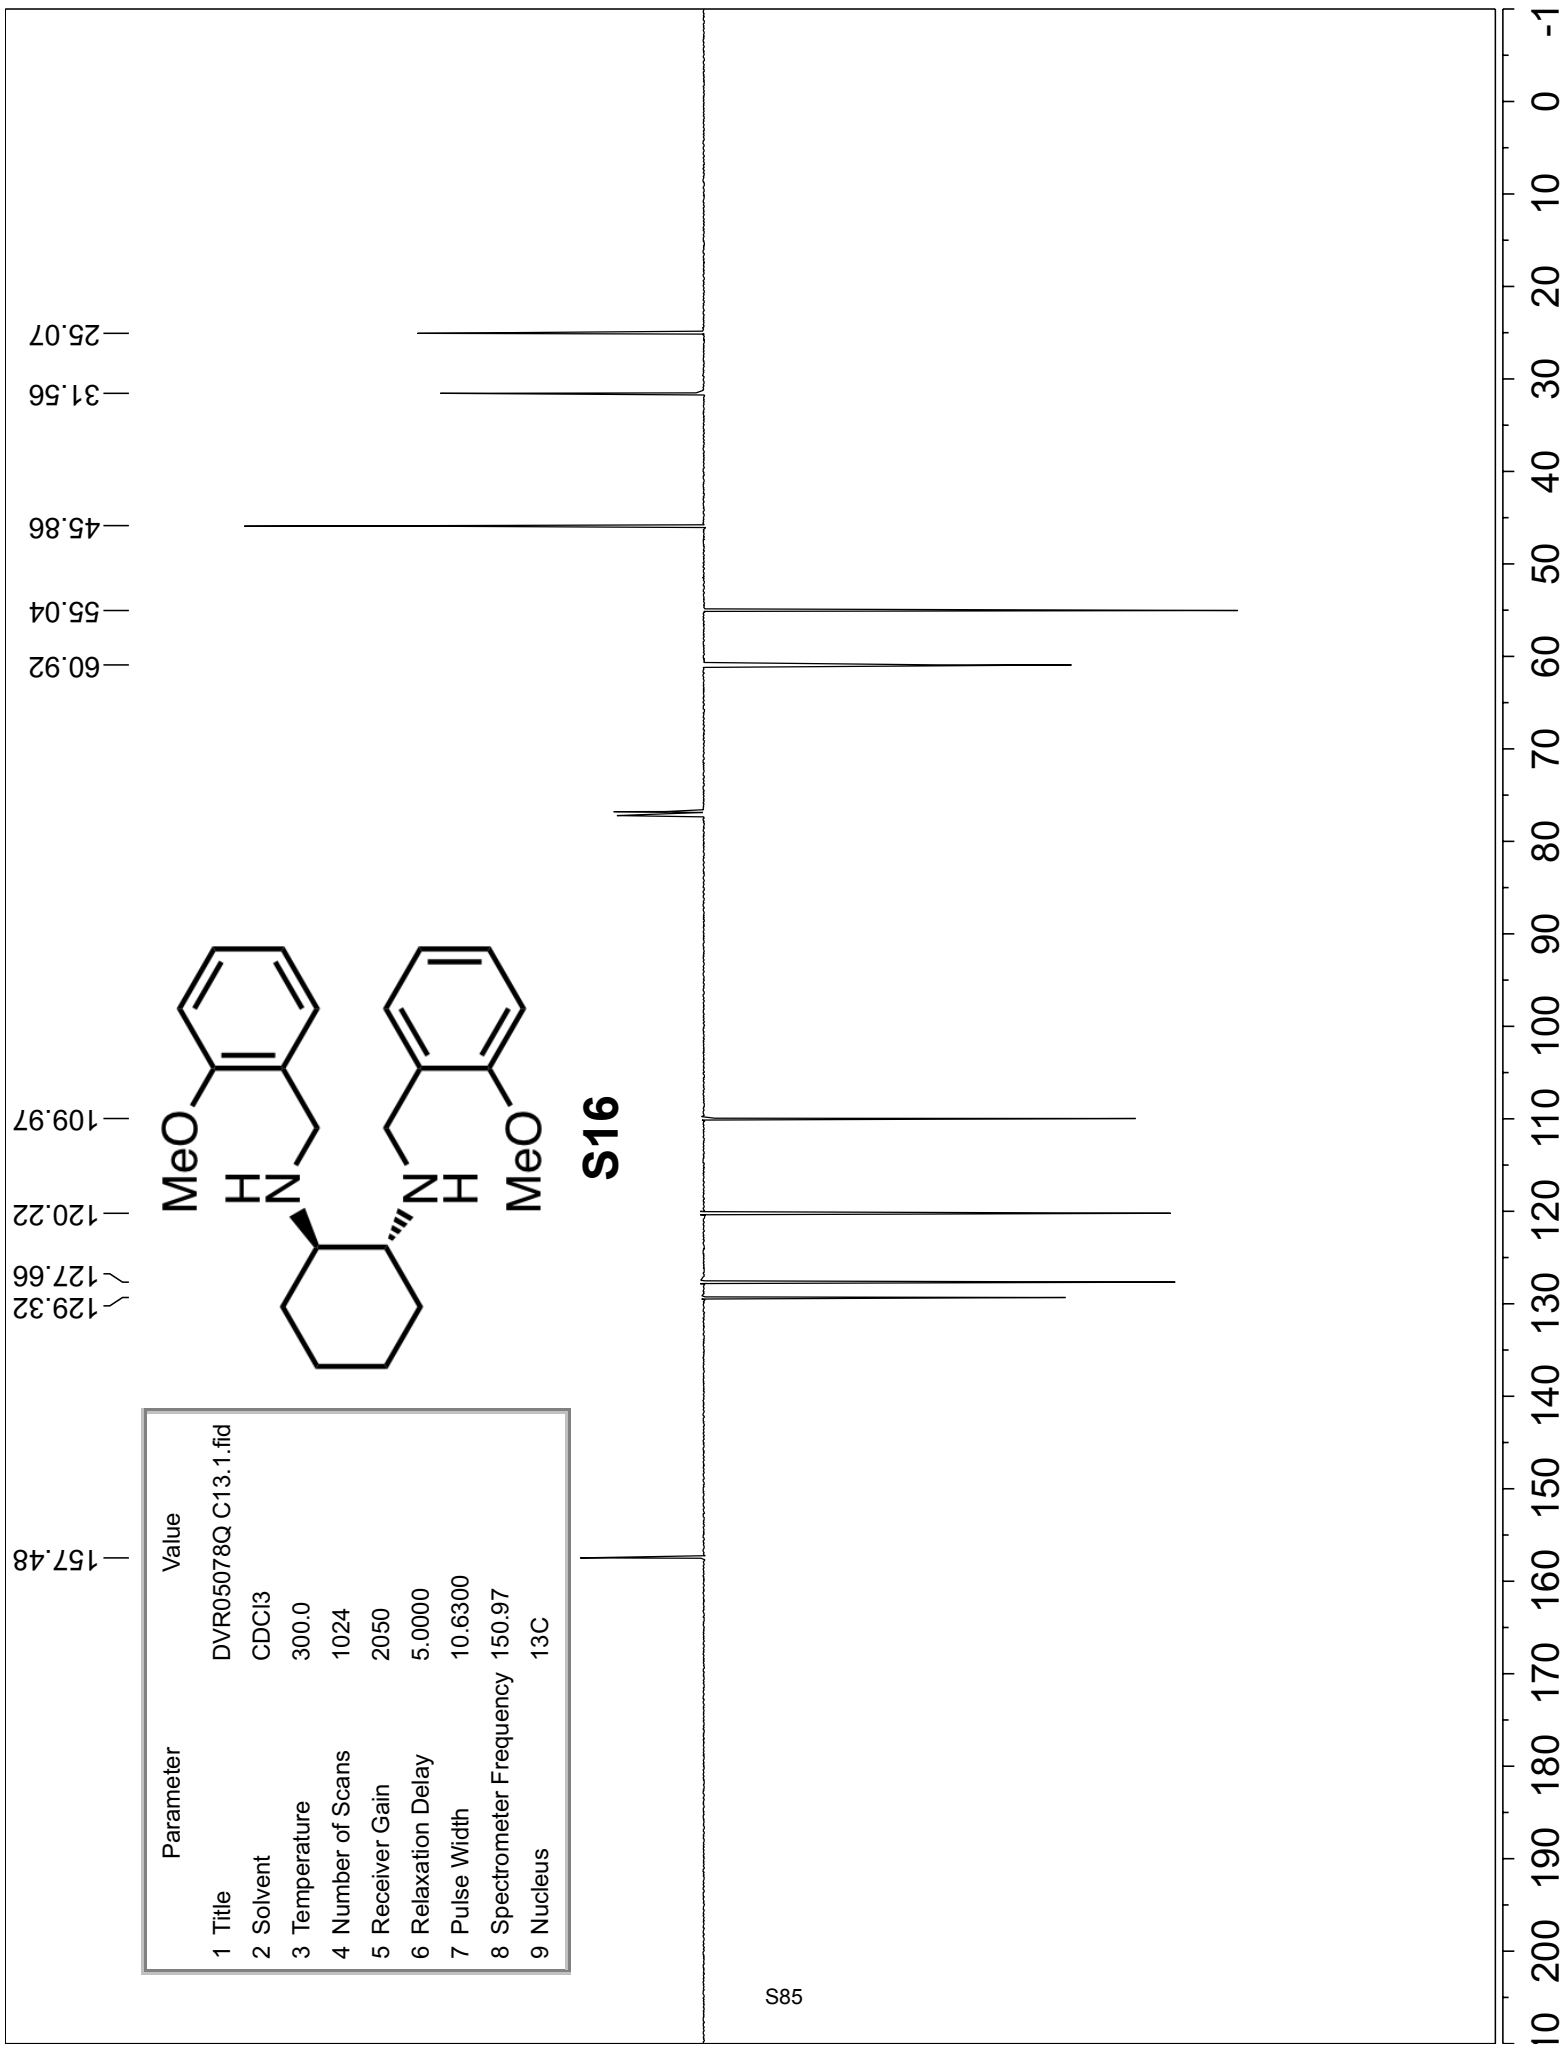

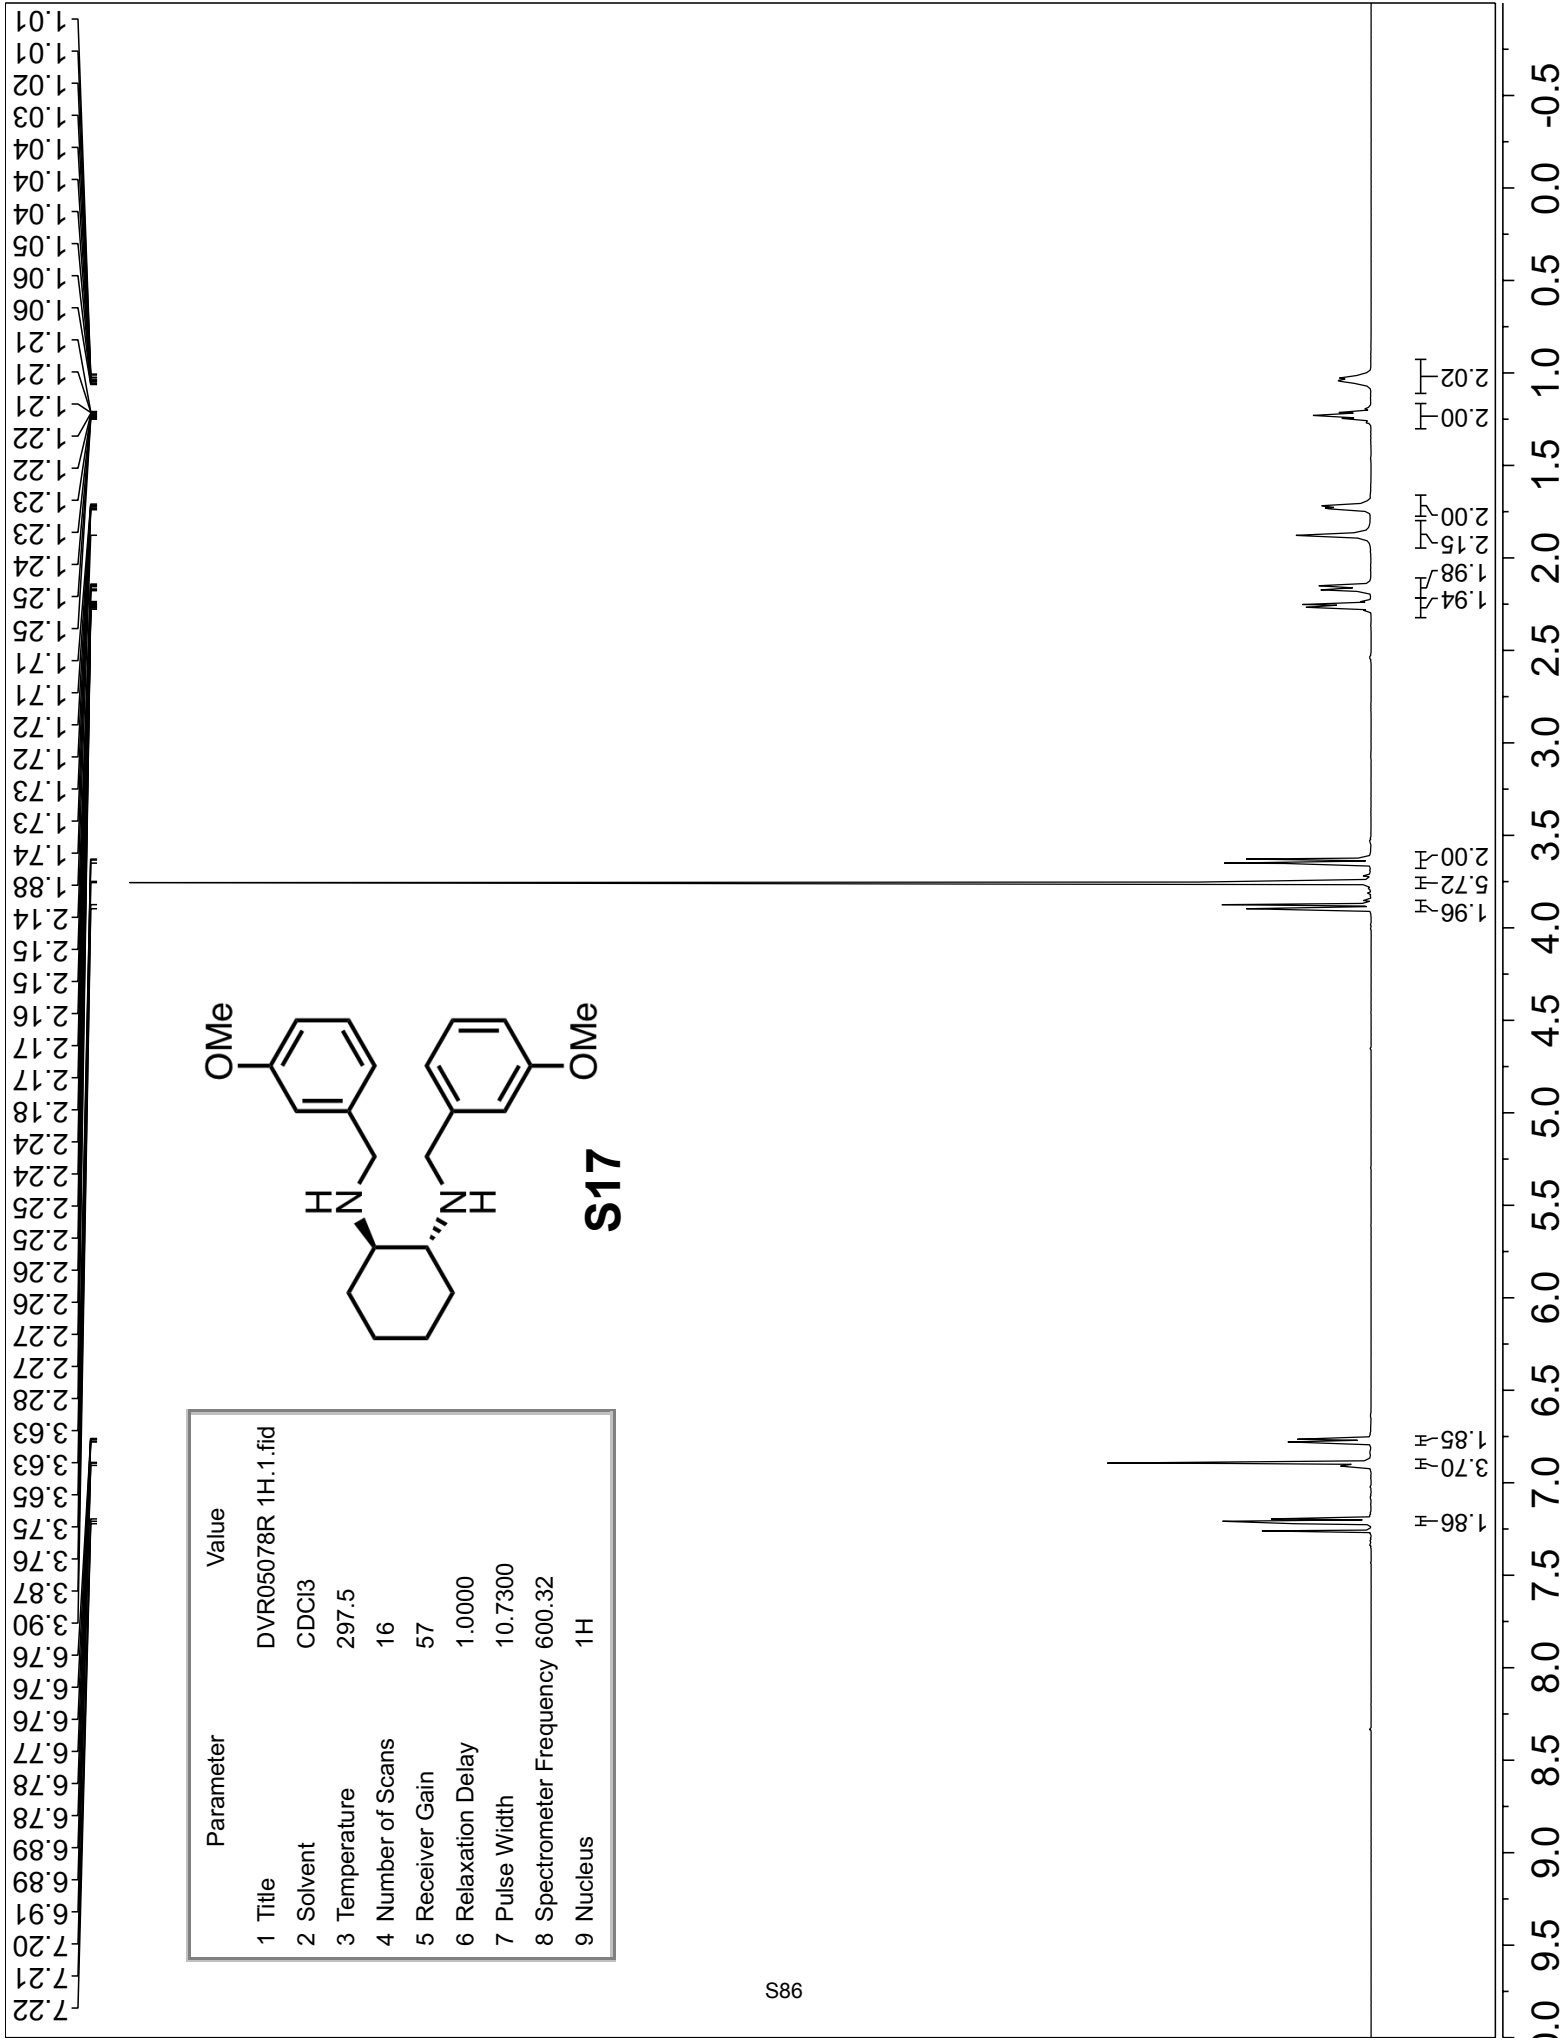

| Parameter                | Value              |
|--------------------------|--------------------|
| 1 Title                  | DVR05078R 1H.1.fid |
| 2 Solvent                | CDCl3              |
| 3 Temperature            | 297.5              |
| 4 Number of Scans        | 16                 |
| 5 Receiver Gain          | 57                 |
| 6 Relaxation Delay       | 1.0000             |
| 7 Pulse Width            | 10.7300            |
| 8 Spectrometer Frequency | 600.32             |
| 9 Nucleus                | 1H                 |

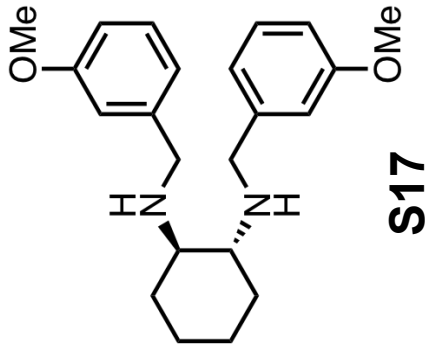

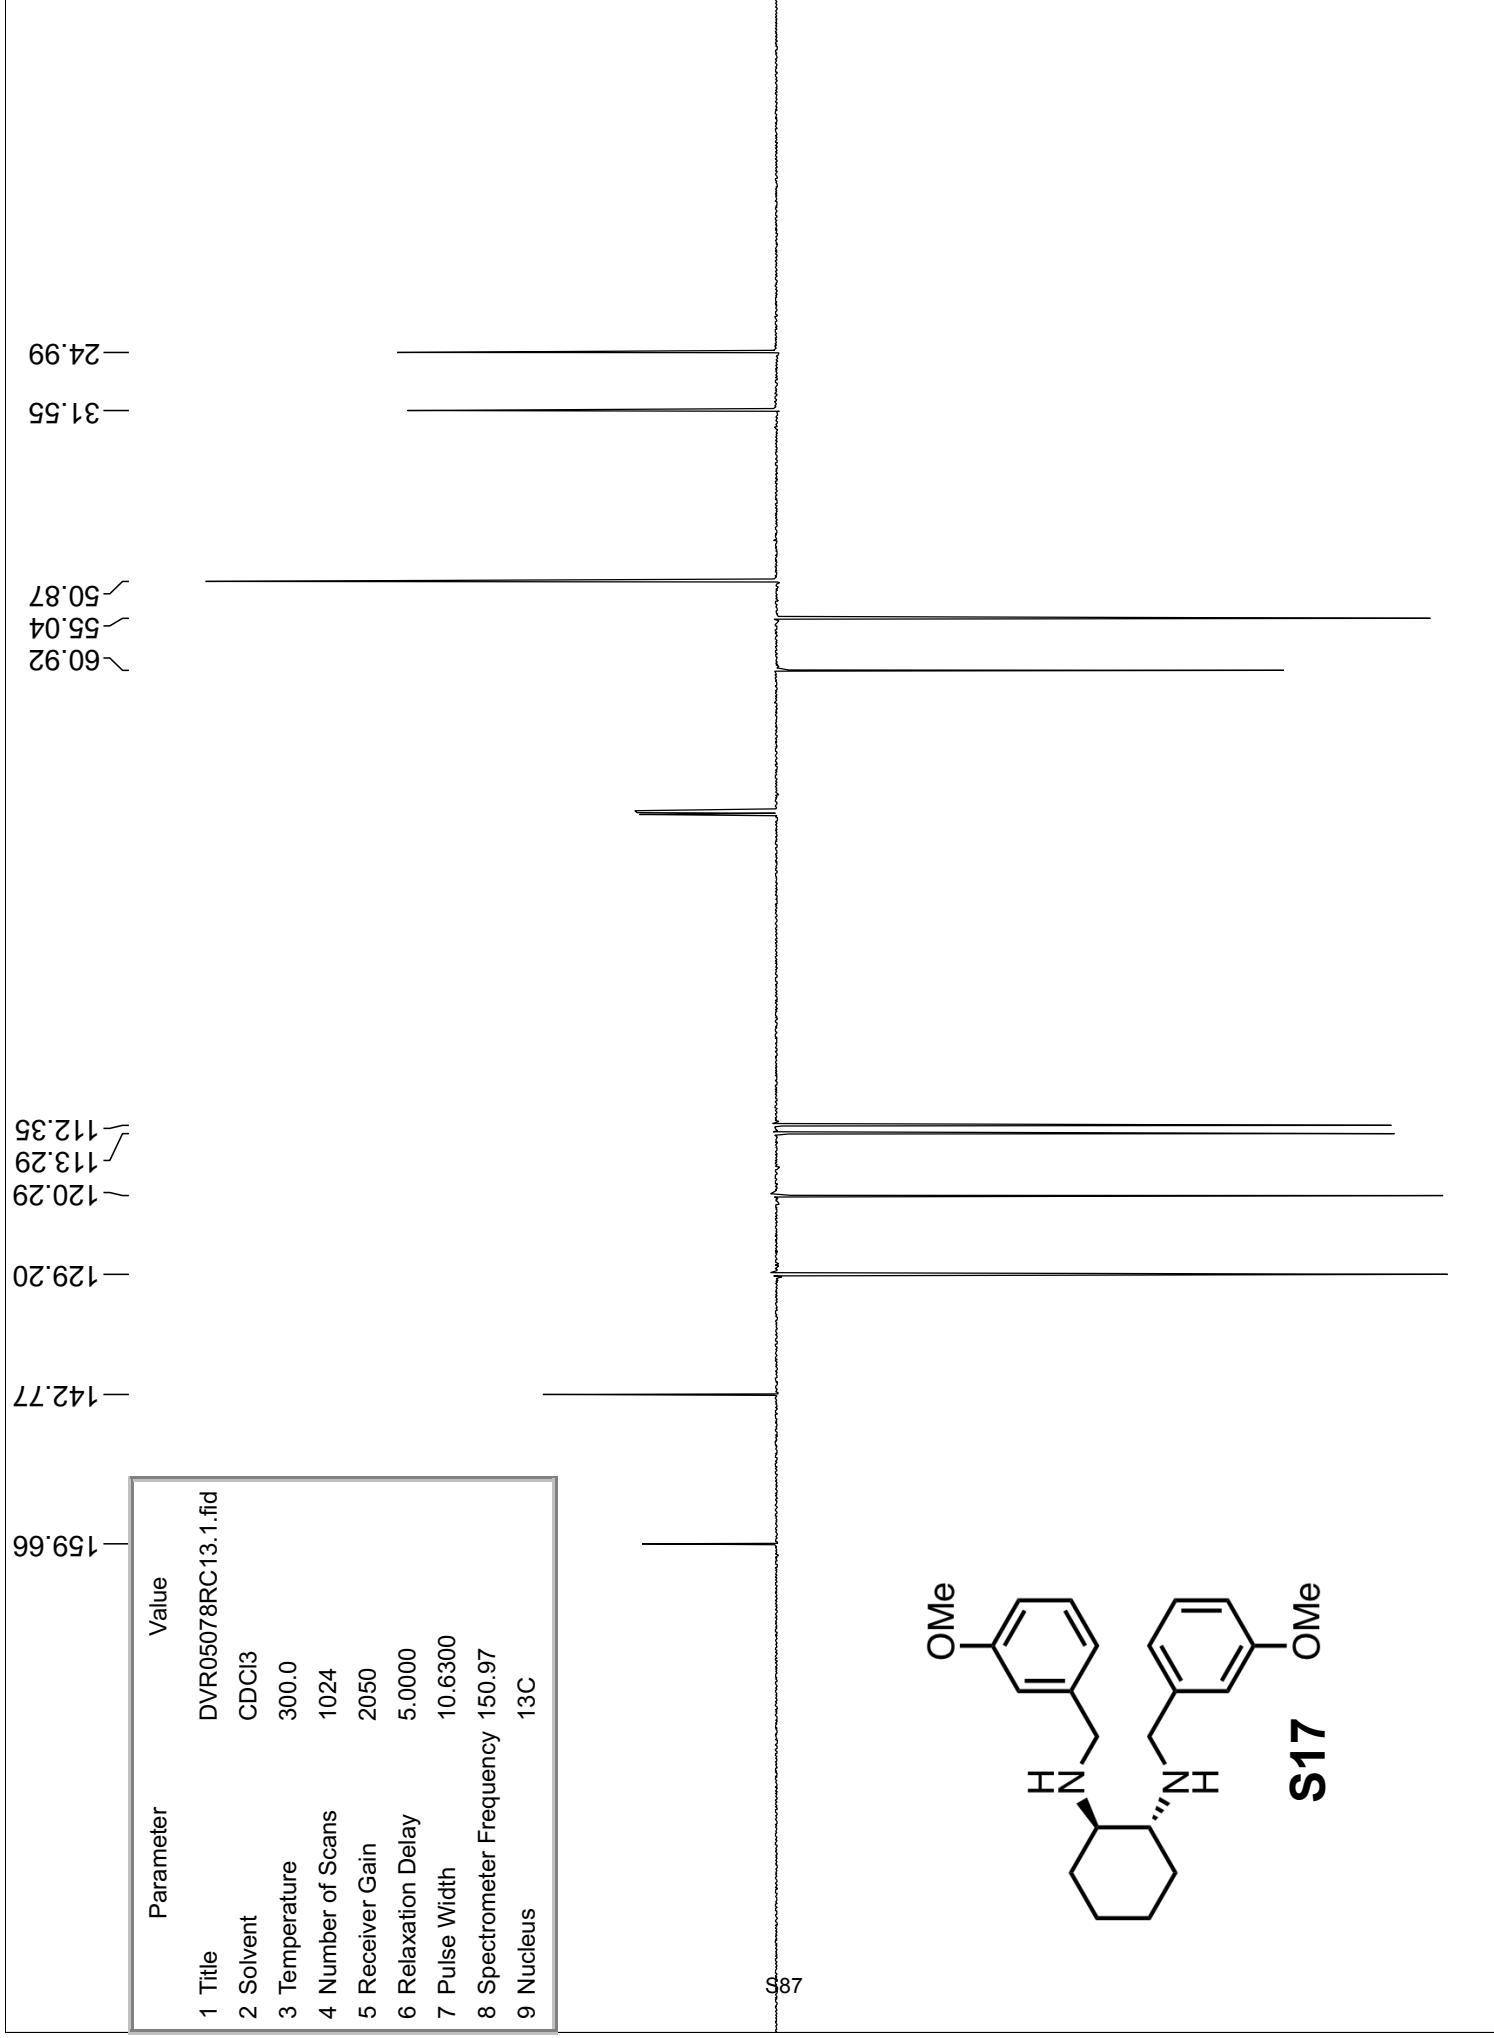

210 200 190 180 170 160 150 140 130 120 110 100 90 80 70 60 50 40 30 20 10 0 -10

6.49  
6.48  
6.33  
6.33  
6.32  
3.89  
3.86  
3.76  
3.73  
3.63  
3.59  
2.90  
2.89  
2.83  
2.32  
2.31  
2.31  
2.30  
2.29  
2.28  
2.19  
2.18  
2.17  
2.16  
2.16  
2.15  
2.14  
1.75  
1.74  
1.74  
1.73  
1.72  
1.72  
1.72  
1.71  
1.26  
1.25  
1.25  
1.24  
1.23  
1.22  
1.21  
1.21  
1.20  
1.18  
1.17  
1.11  
1.08

| Parameter                | Value           |
|--------------------------|-----------------|
| 1 Title                  | DVR05078N.1.fid |
| 2 Solvent                | CDC13           |
| 3 Temperature            | 298.2           |
| 4 Number of Scans        | 16              |
| 5 Receiver Gain          | 9               |
| 6 Relaxation Delay       | 1.0000          |
| 7 Pulse Width            | 15.0000         |
| 8 Spectrometer Frequency | 400.13          |
| 9 Nucleus                | <sup>1</sup> H  |

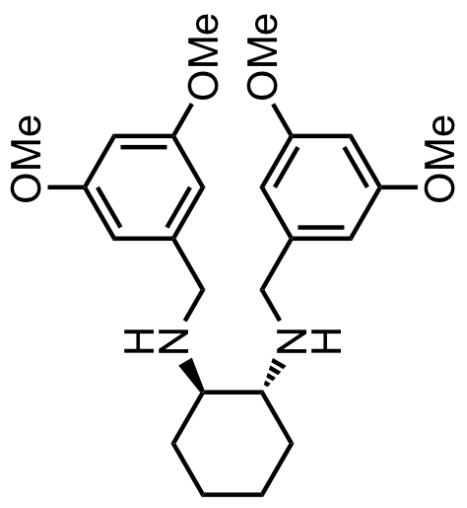

**S18**

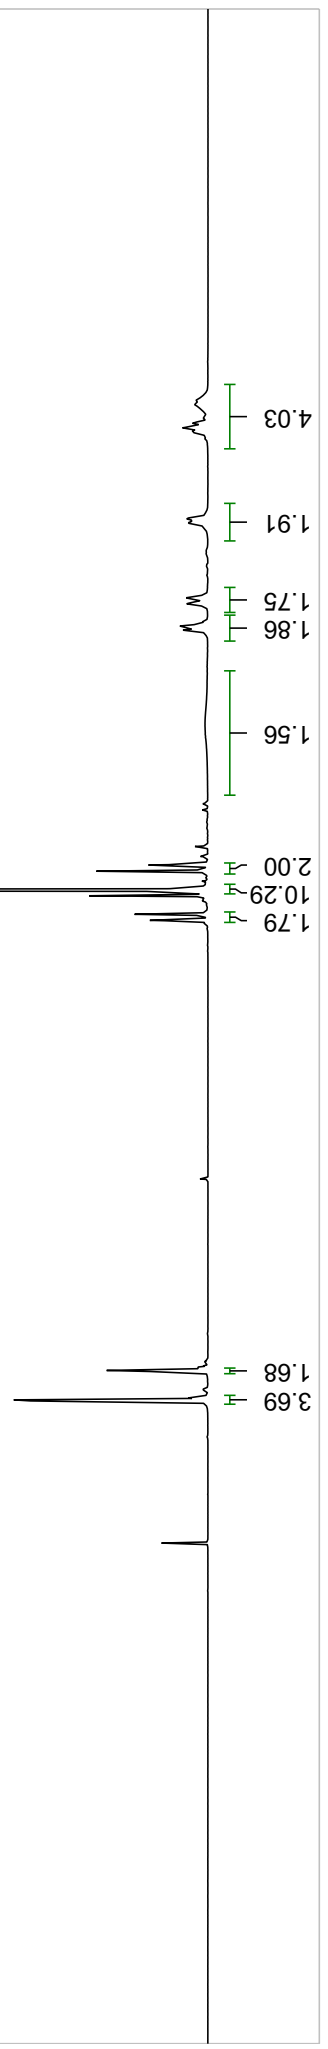

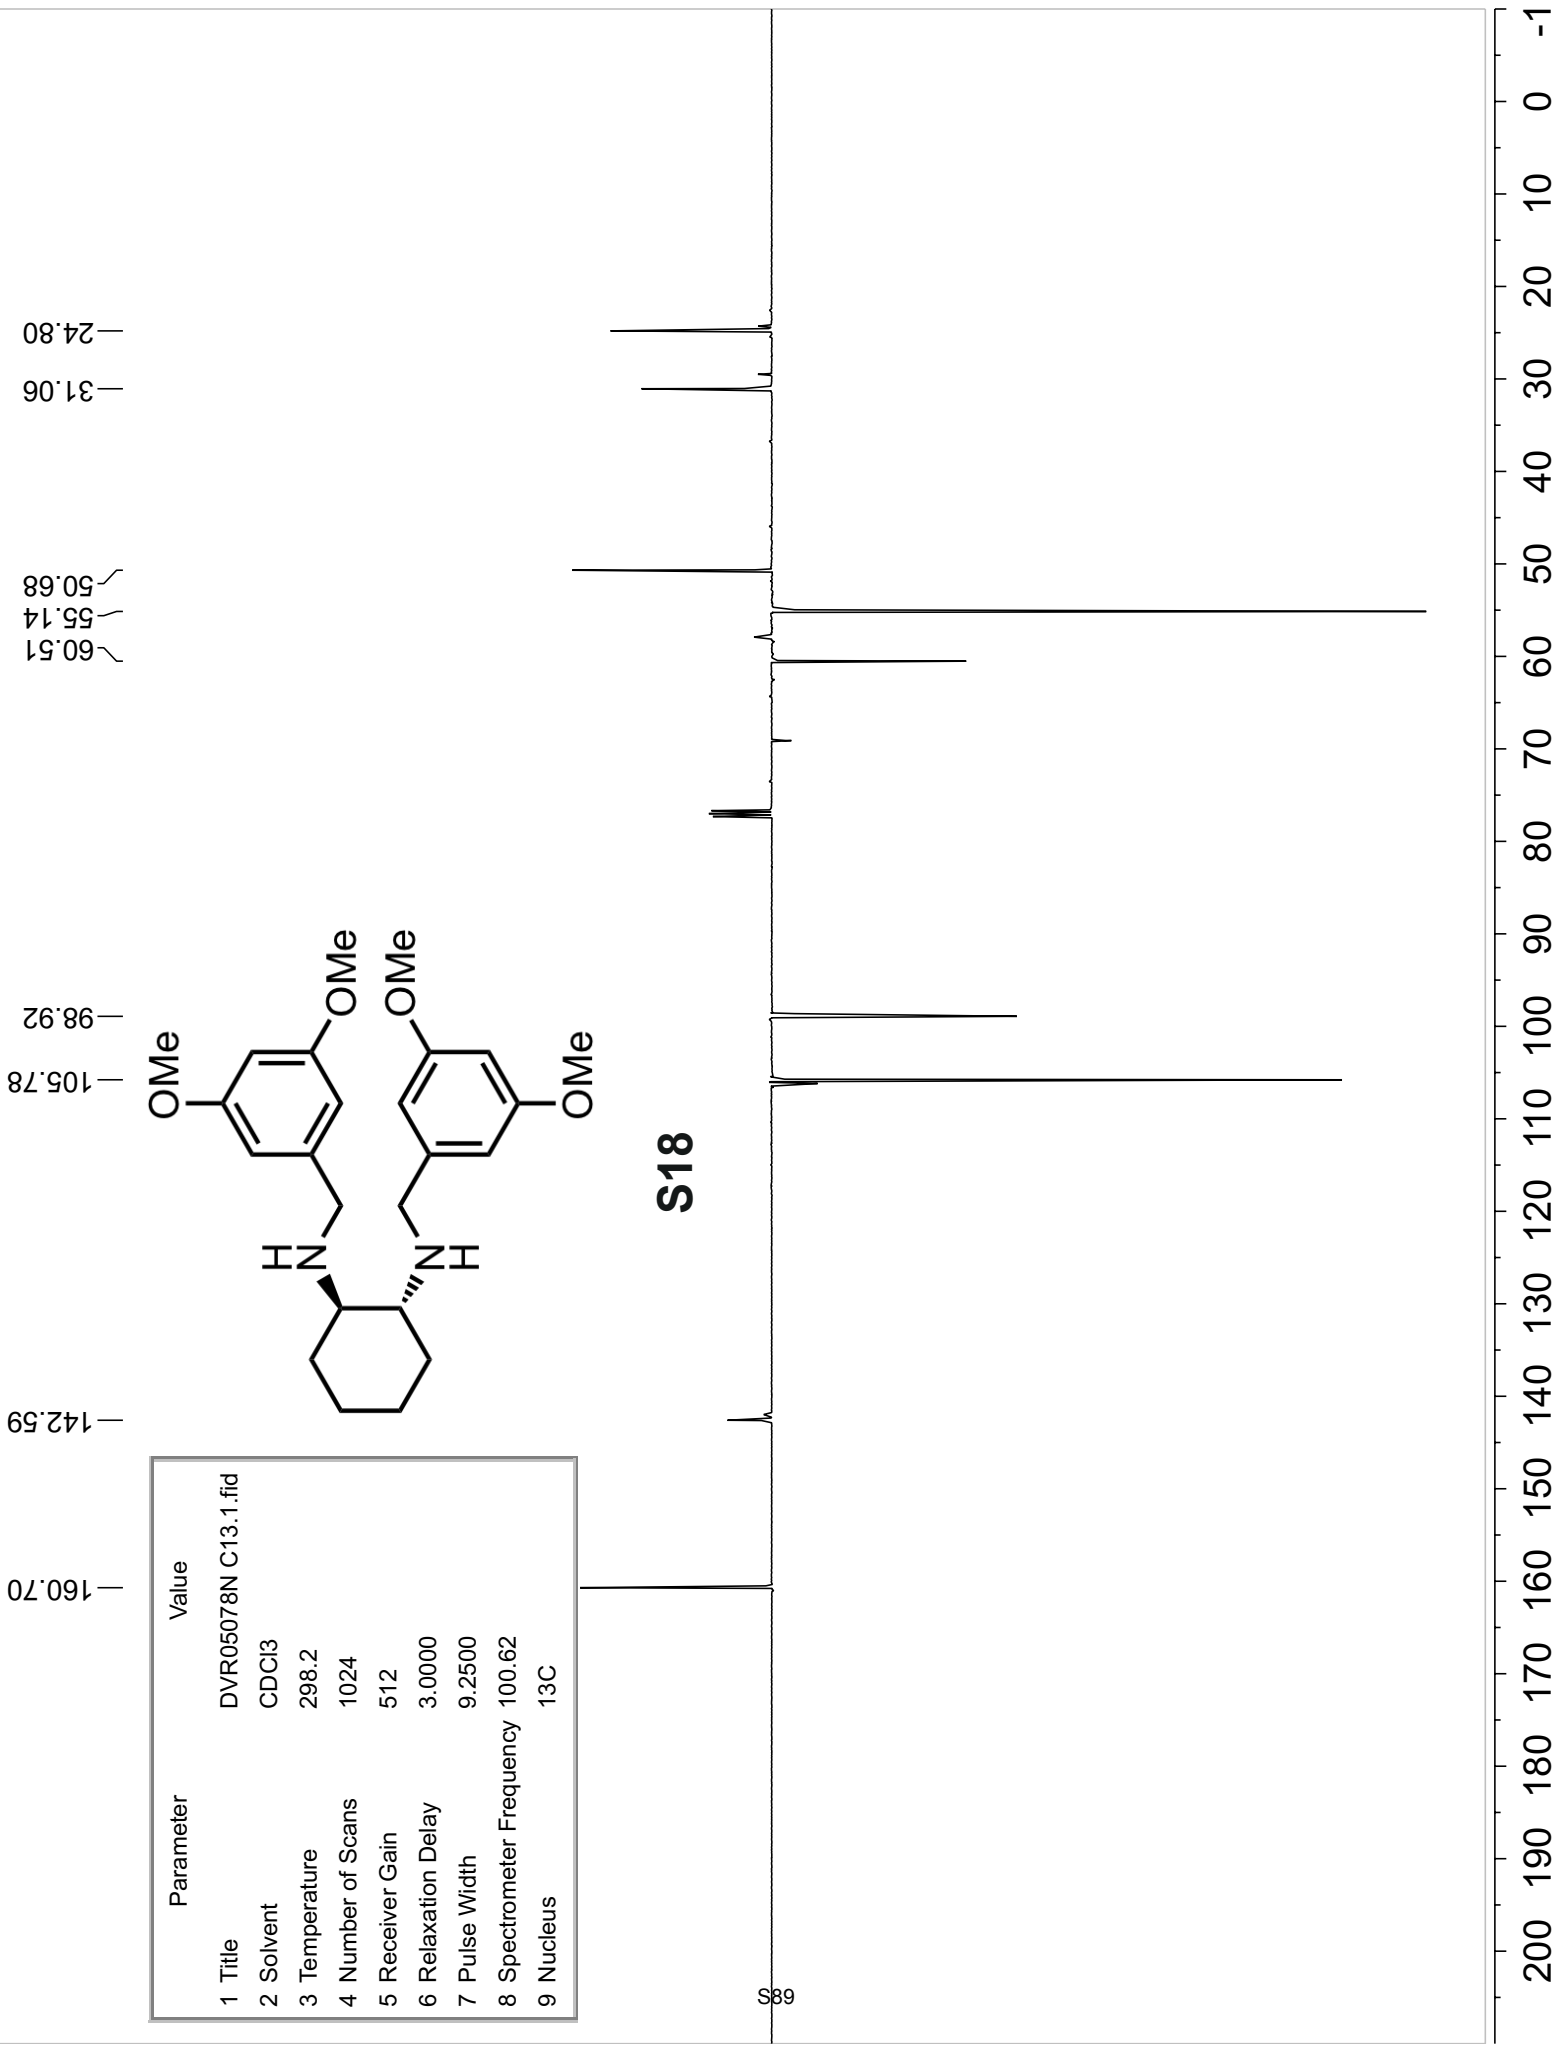

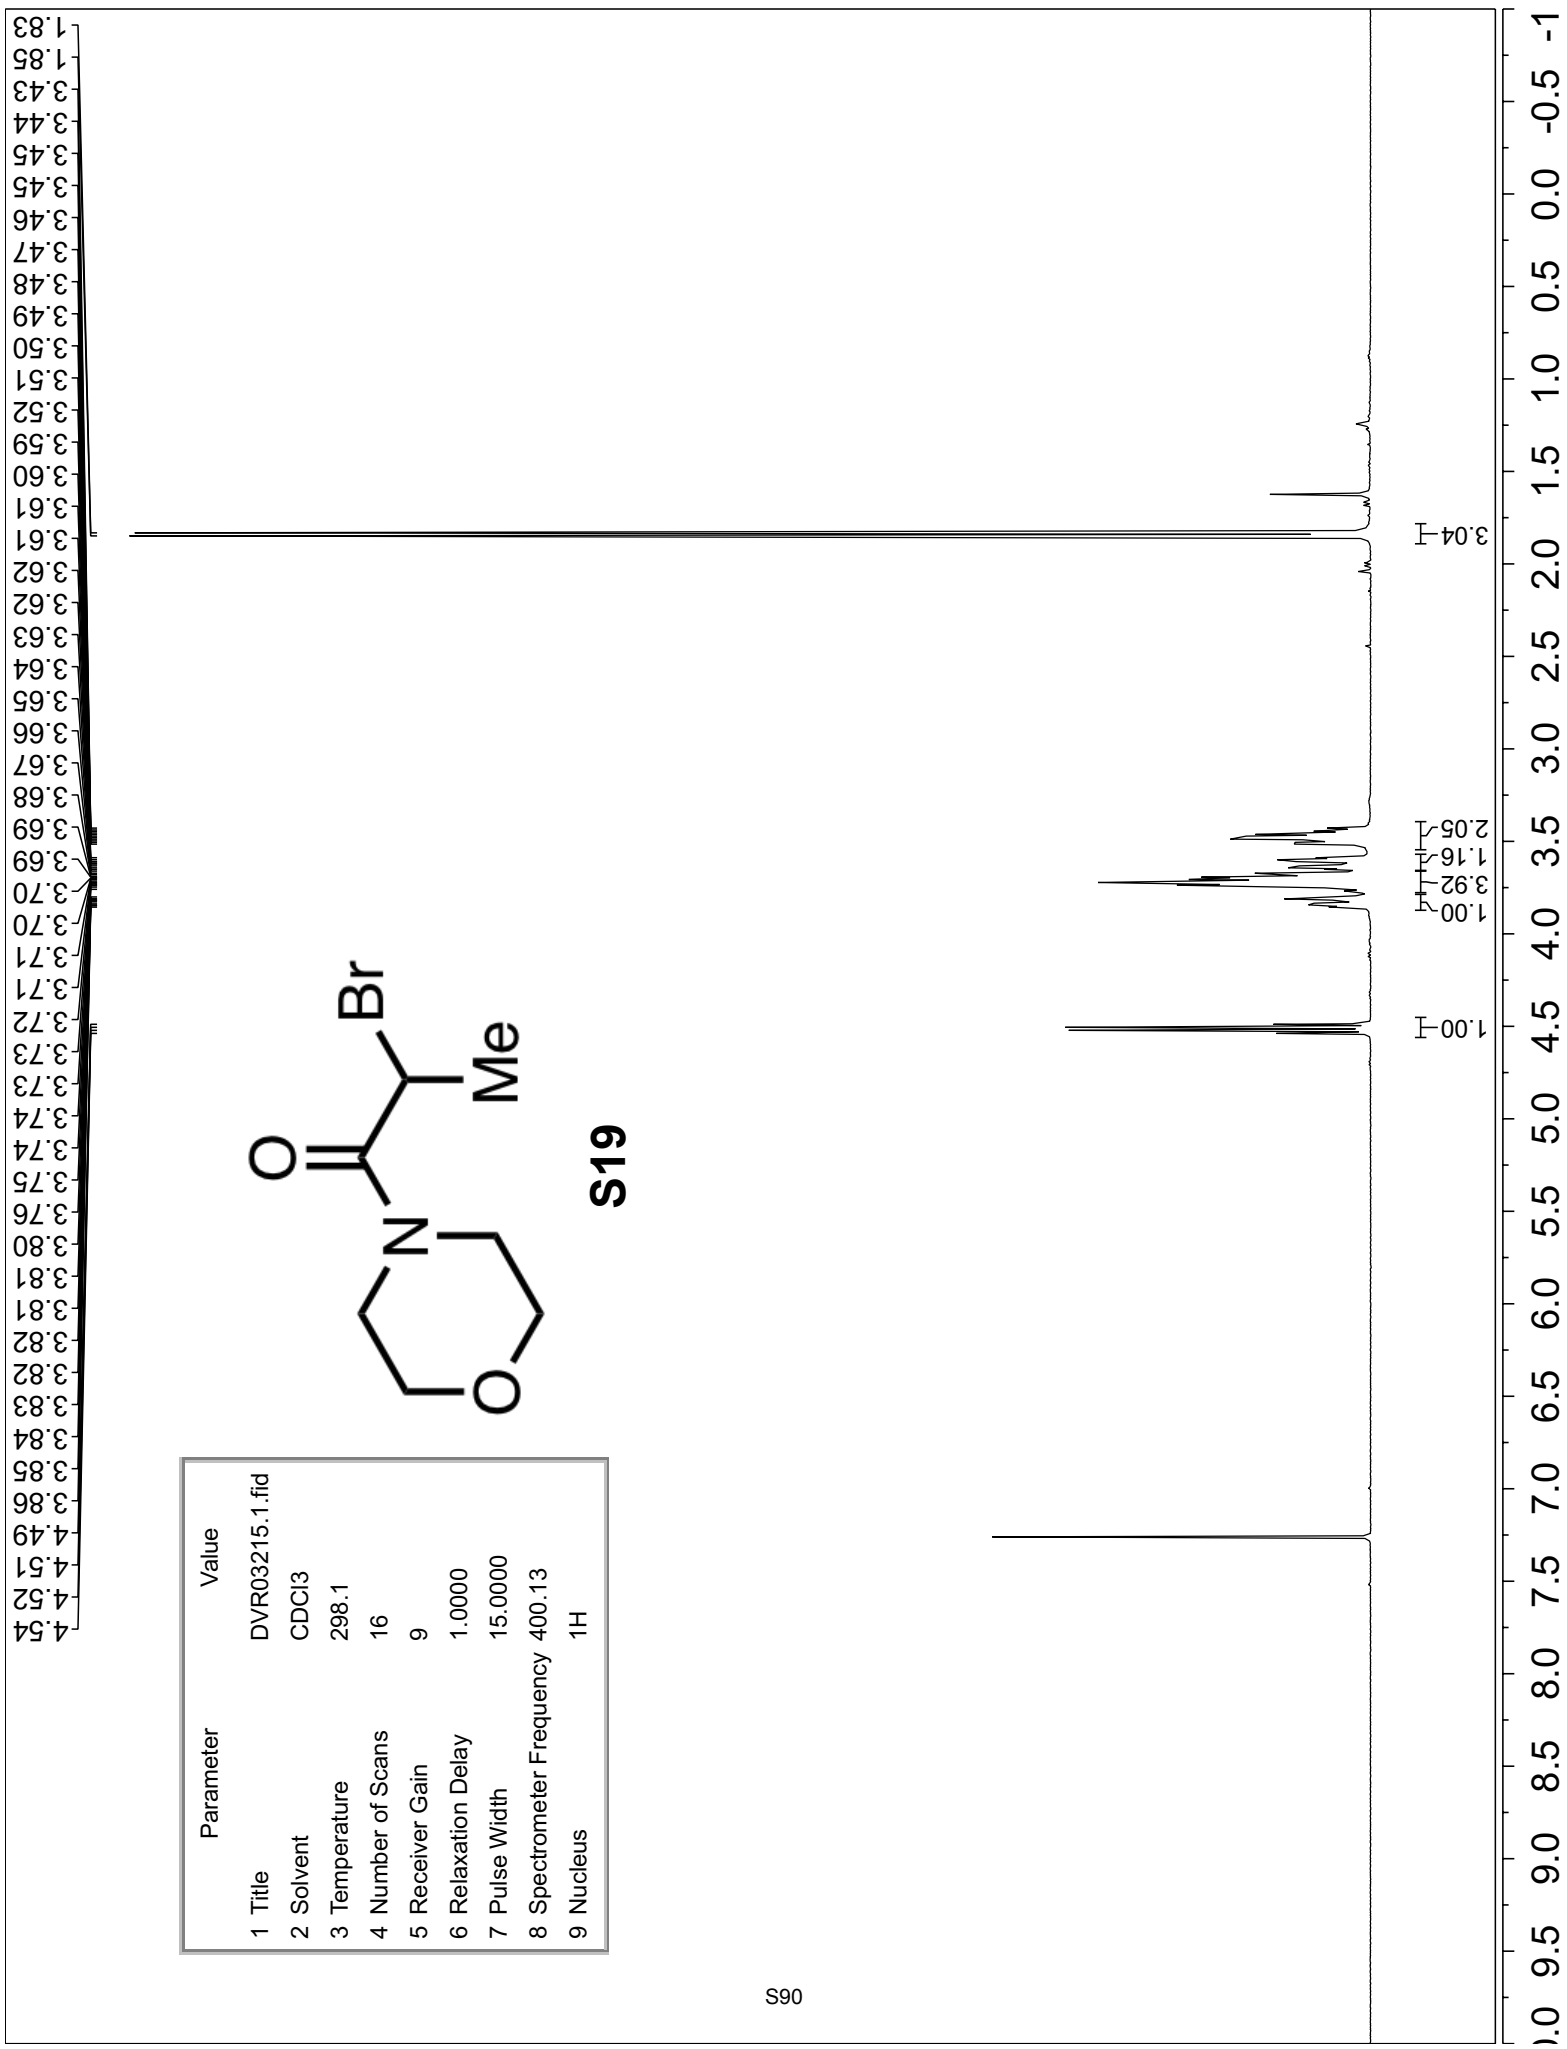

| Parameter                | Value          |
|--------------------------|----------------|
| 1 Title                  | DVR03215.1.fid |
| 2 Solvent                | CDCl3          |
| 3 Temperature            | 298.1          |
| 4 Number of Scans        | 16             |
| 5 Receiver Gain          | 9              |
| 6 Relaxation Delay       | 1.0000         |
| 7 Pulse Width            | 15.0000        |
| 8 Spectrometer Frequency | 400.13         |
| 9 Nucleus                | <sup>1</sup> H |



167.58

| Parameter                | Value             |
|--------------------------|-------------------|
| 1 Title                  | DVR03215C13.1.fid |
| 2 Solvent                | CDCl3             |
| 3 Temperature            | 298.2             |
| 4 Number of Scans        | 1024              |
| 5 Receiver Gain          | 512               |
| 6 Relaxation Delay       | 3.0000            |
| 7 Pulse Width            | 9.2500            |
| 8 Spectrometer Frequency | 100.62            |
| 9 Nucleus                | <sup>13</sup> C   |

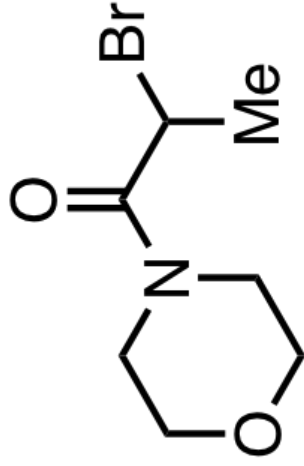

S19

66.57  
66.18

46.45  
42.54  
37.65

21.46

167

200 190 180 170 160 150 140 130 120 110 100 90 80 70 60 50 40 30 20 10 0 -1

1.73  
1.74

3.30

4.25  
4.26  
4.28  
4.30

7.28  
7.30  
7.38  
7.38  
7.38  
7.39  
7.40  
7.41  
7.41  
7.42  
7.42  
7.44  
7.44  
7.44  
7.45  
7.46  
7.46  
7.48  
7.48

| Parameter                | Value          |
|--------------------------|----------------|
| 1 Title                  | DVR03045.1.fid |
| 2 Solvent                | CDCl3          |
| 3 Temperature            | 298.2          |
| 4 Number of Scans        | 16             |
| 5 Receiver Gain          | 10             |
| 6 Relaxation Delay       | 1.0000         |
| 7 Pulse Width            | 15.0000        |
| 8 Spectrometer Frequency | 400.13         |
| 9 Nucleus                | <sup>1</sup> H |

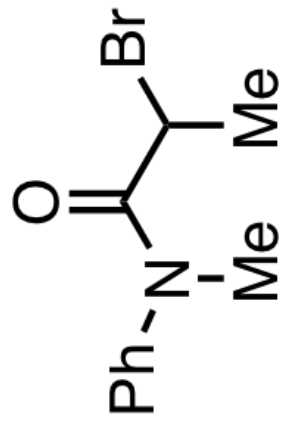

S20

3.08

3.05

1.00

1.94  
3.10

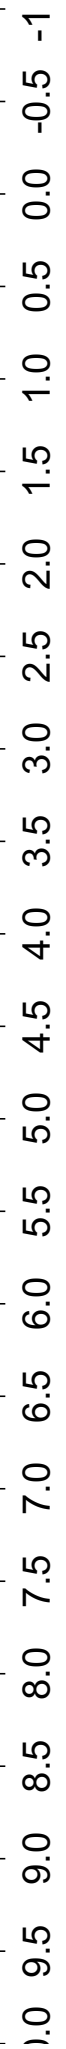

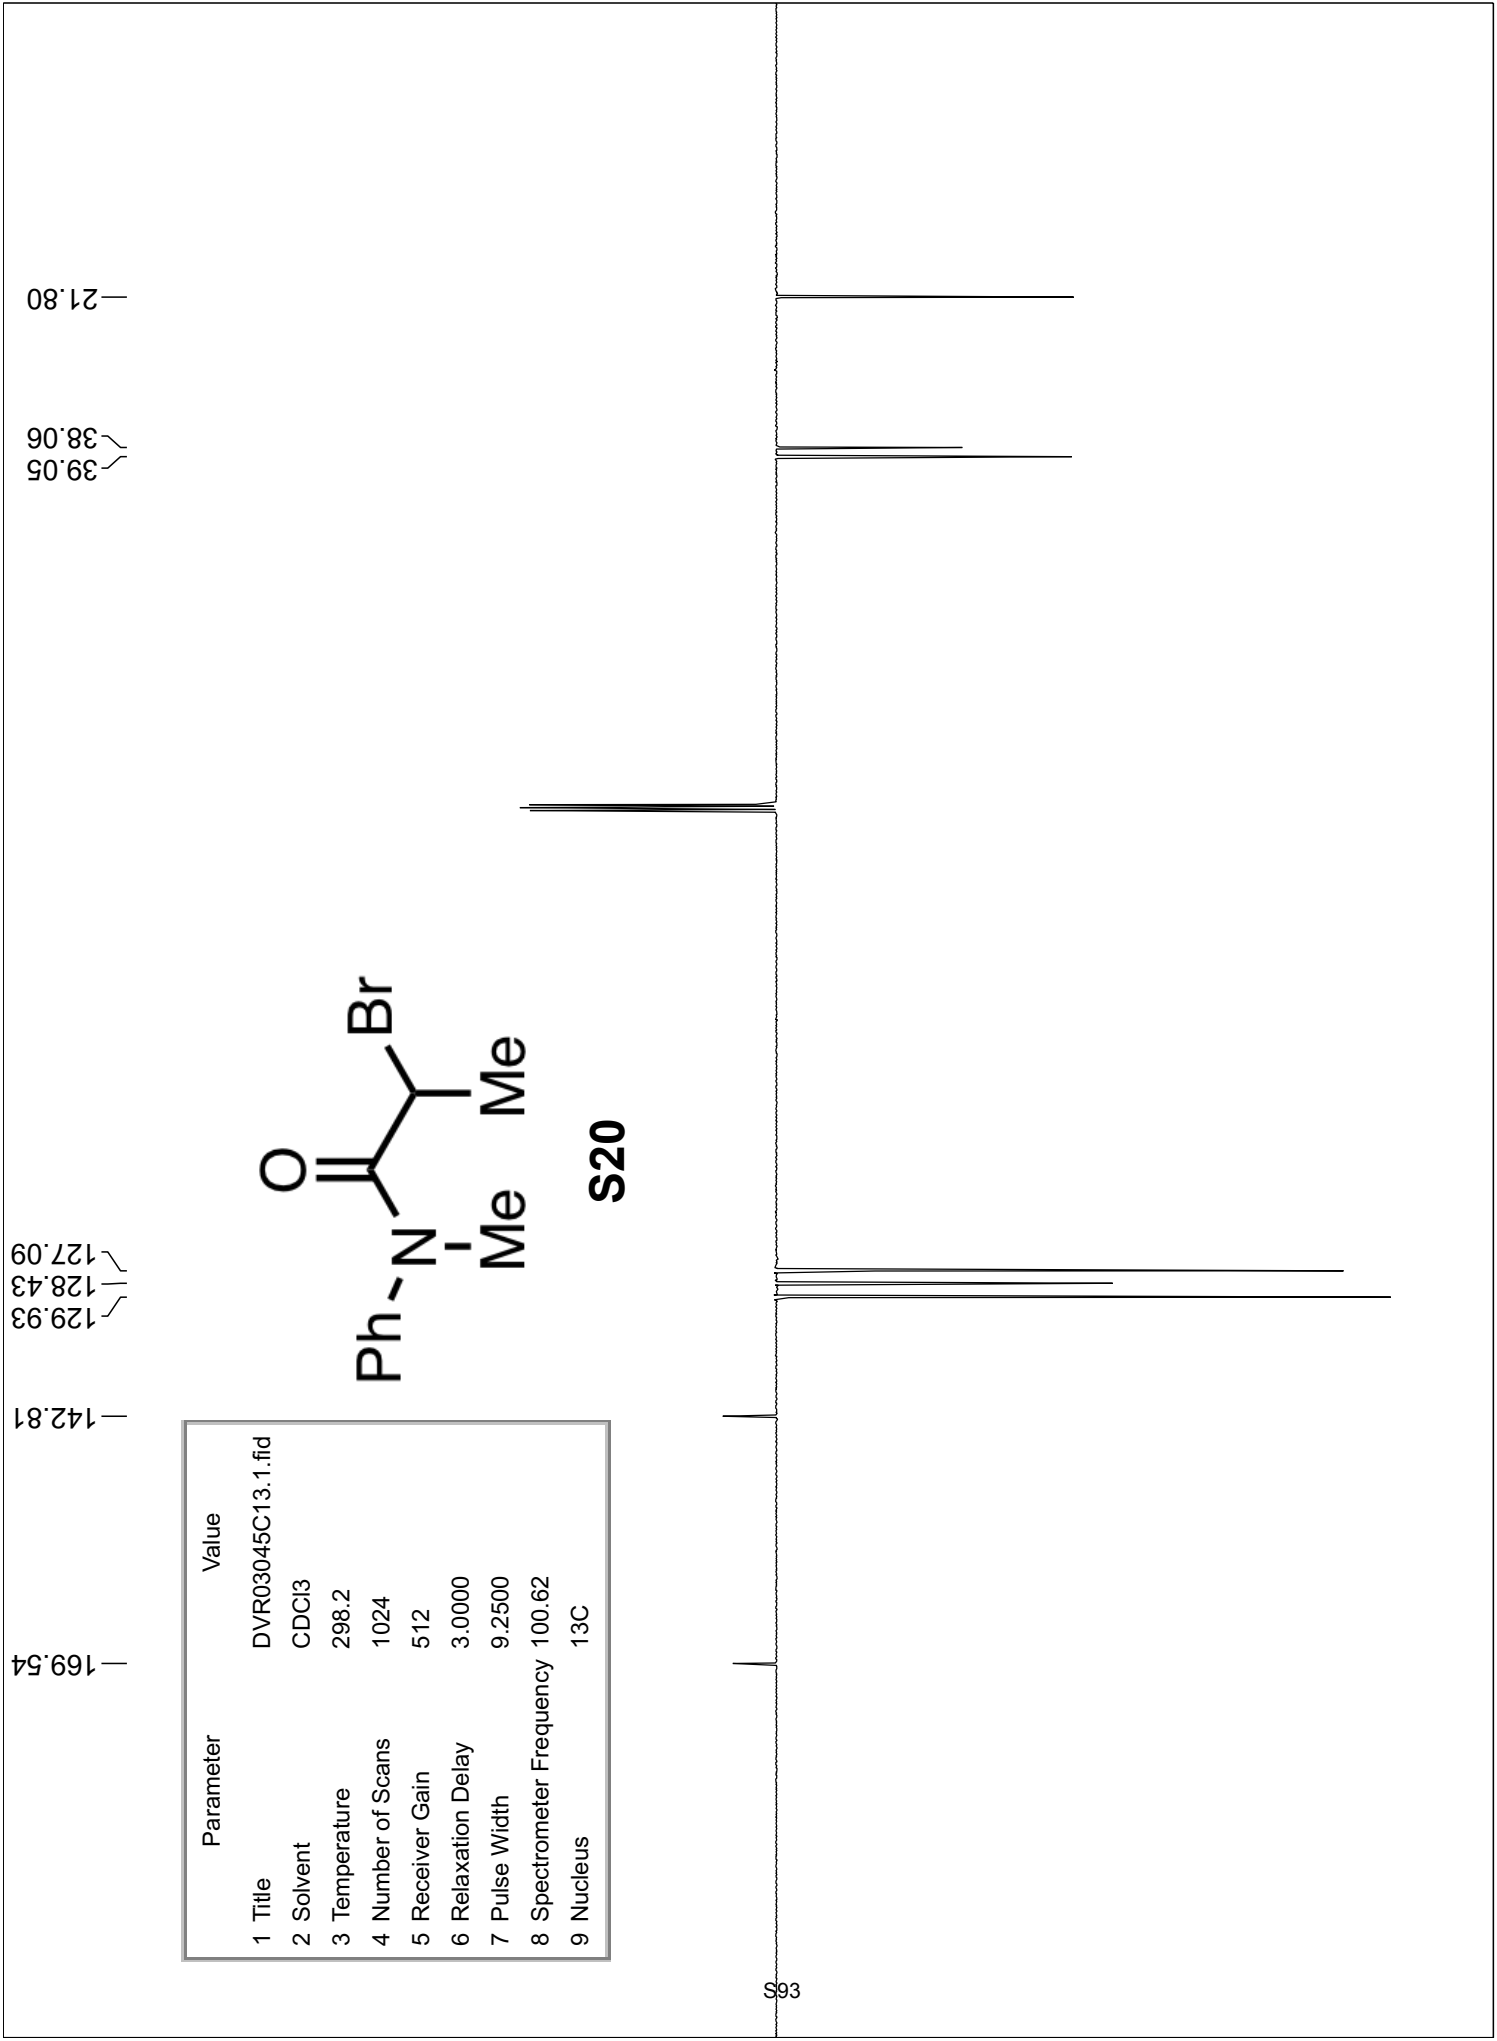

8.10  
8.08  
8.08  
7.28  
7.27  
7.26  
7.26  
7.21  
7.20  
7.19  
7.18  
7.17  
7.16  
7.07  
7.06  
7.05  
7.05  
7.03  
7.03  
5.01  
4.99  
4.97  
4.96  
4.30  
4.29  
4.28  
4.26  
4.25  
4.24  
4.19  
4.17  
4.16  
4.15  
4.14  
4.14  
3.25  
3.23  
3.21  
3.19  
3.18  
3.17  
3.17  
3.15  
3.13  
3.11  
1.76  
1.75

| Parameter                | Value          |
|--------------------------|----------------|
| 1 Title                  | DVR02235.1.fid |
| 2 Solvent                | DMSO           |
| 3 Temperature            | 298.2          |
| 4 Number of Scans        | 16             |
| 5 Receiver Gain          | 8              |
| 6 Relaxation Delay       | 1.0000         |
| 7 Pulse Width            | 15.0000        |
| 8 Spectrometer Frequency | 400.13         |
| 9 Nucleus                | <sup>1</sup> H |

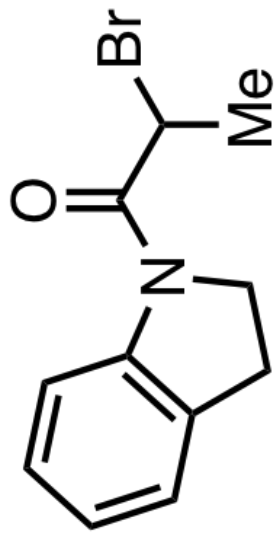

**S21**

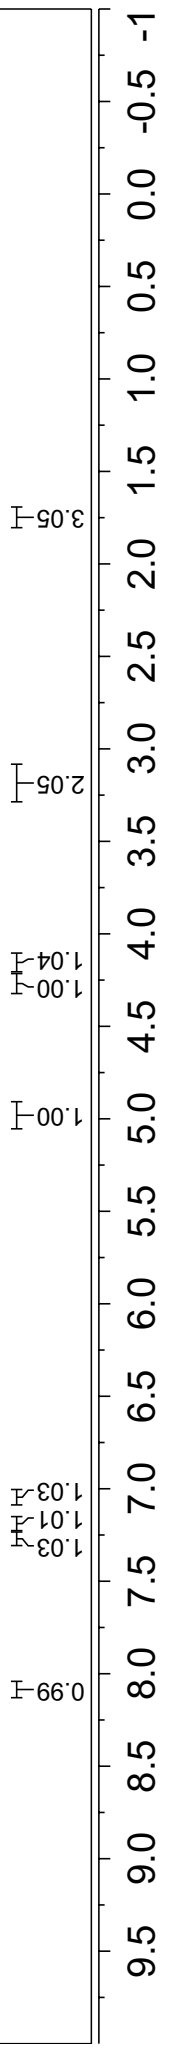

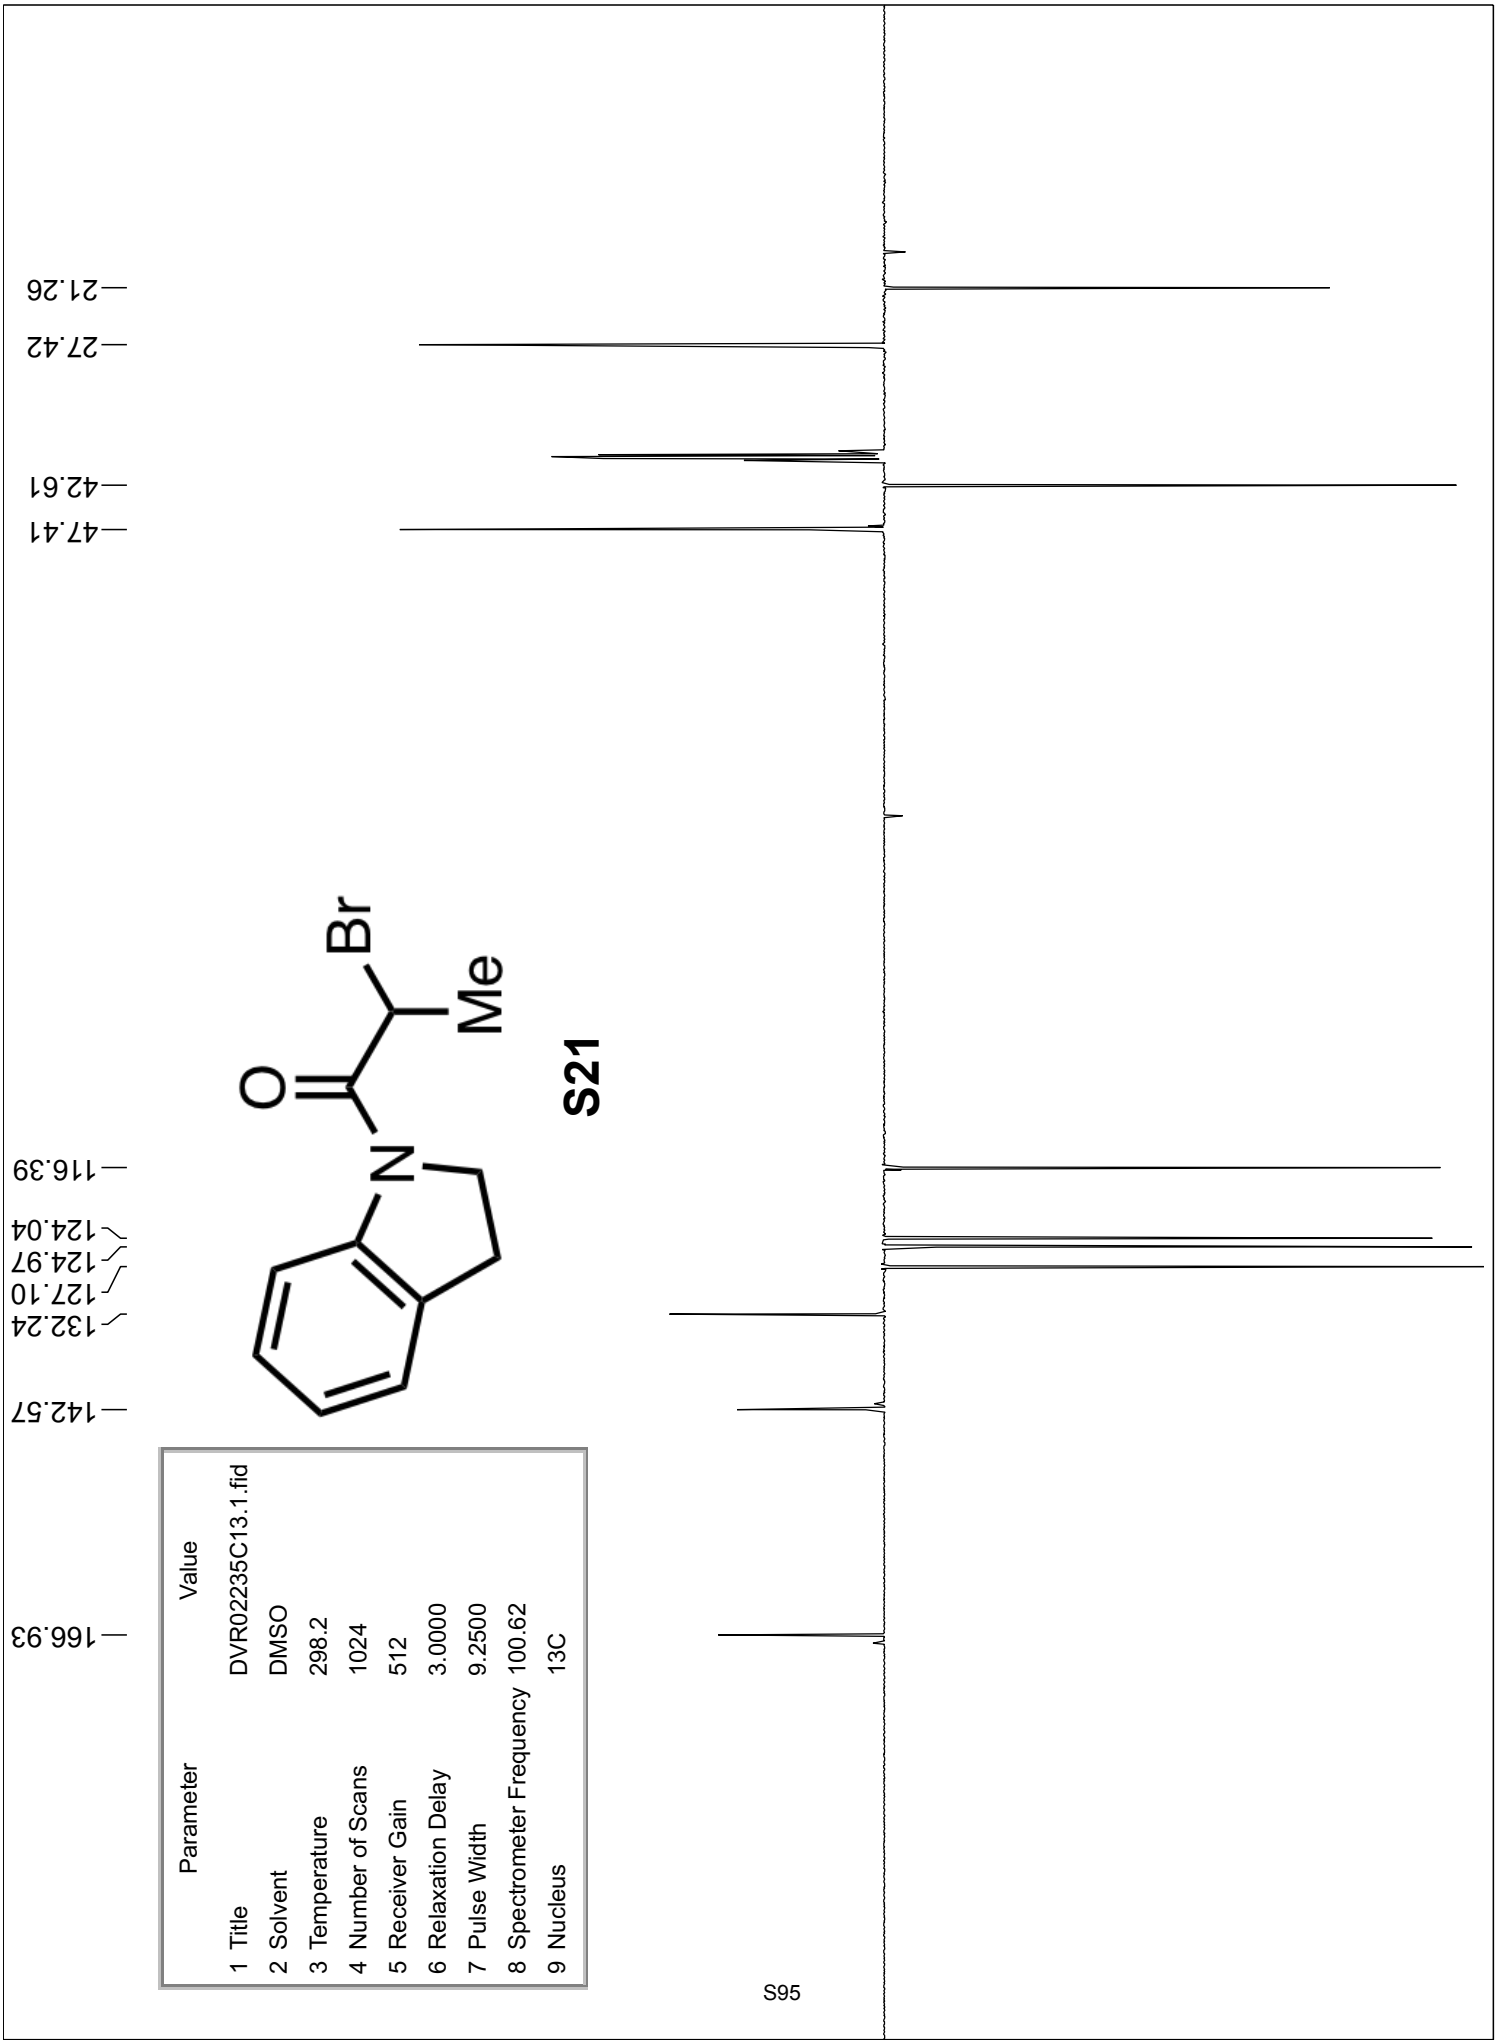

7.29  
7.29  
7.28  
7.28  
7.27  
7.27  
7.27  
7.27  
7.27  
7.26  
7.26  
7.26  
7.26  
7.26  
7.26  
7.25  
7.25  
7.25  
7.20  
7.20  
7.19  
7.19  
7.19  
7.18  
6.95  
6.84  
6.84  
6.83  
6.82  
6.82  
6.82  
4.95  
4.93  
4.76  
4.74  
4.26  
4.25  
4.24  
4.23  
3.80  
1.76  
1.75

| Parameter                | Value            |
|--------------------------|------------------|
| 1 Title                  | DVR05082A1.1.fid |
| 2 Solvent                | CDCl3            |
| 3 Temperature            | 296.9            |
| 4 Number of Scans        | 16               |
| 5 Receiver Gain          | 101              |
| 6 Relaxation Delay       | 1.0000           |
| 7 Pulse Width            | 10.7300          |
| 8 Spectrometer Frequency | 600.32           |
| 9 Nucleus                | <sup>1</sup> H   |

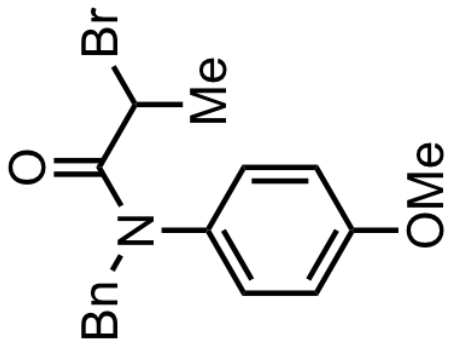

**S23**

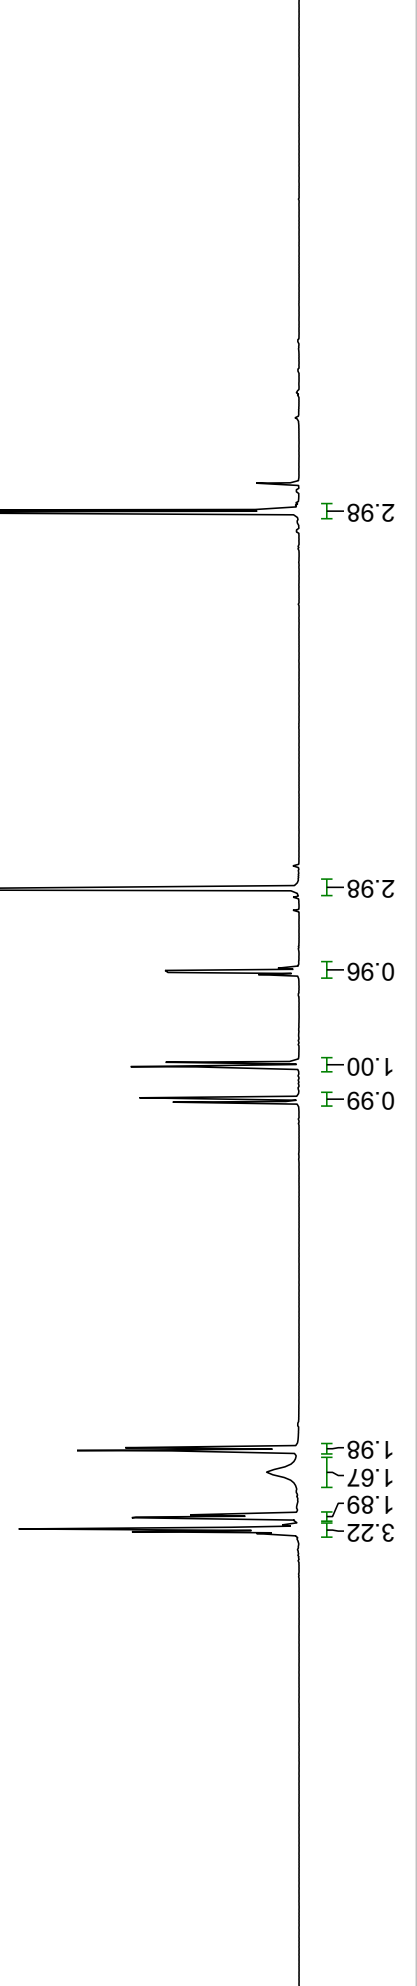

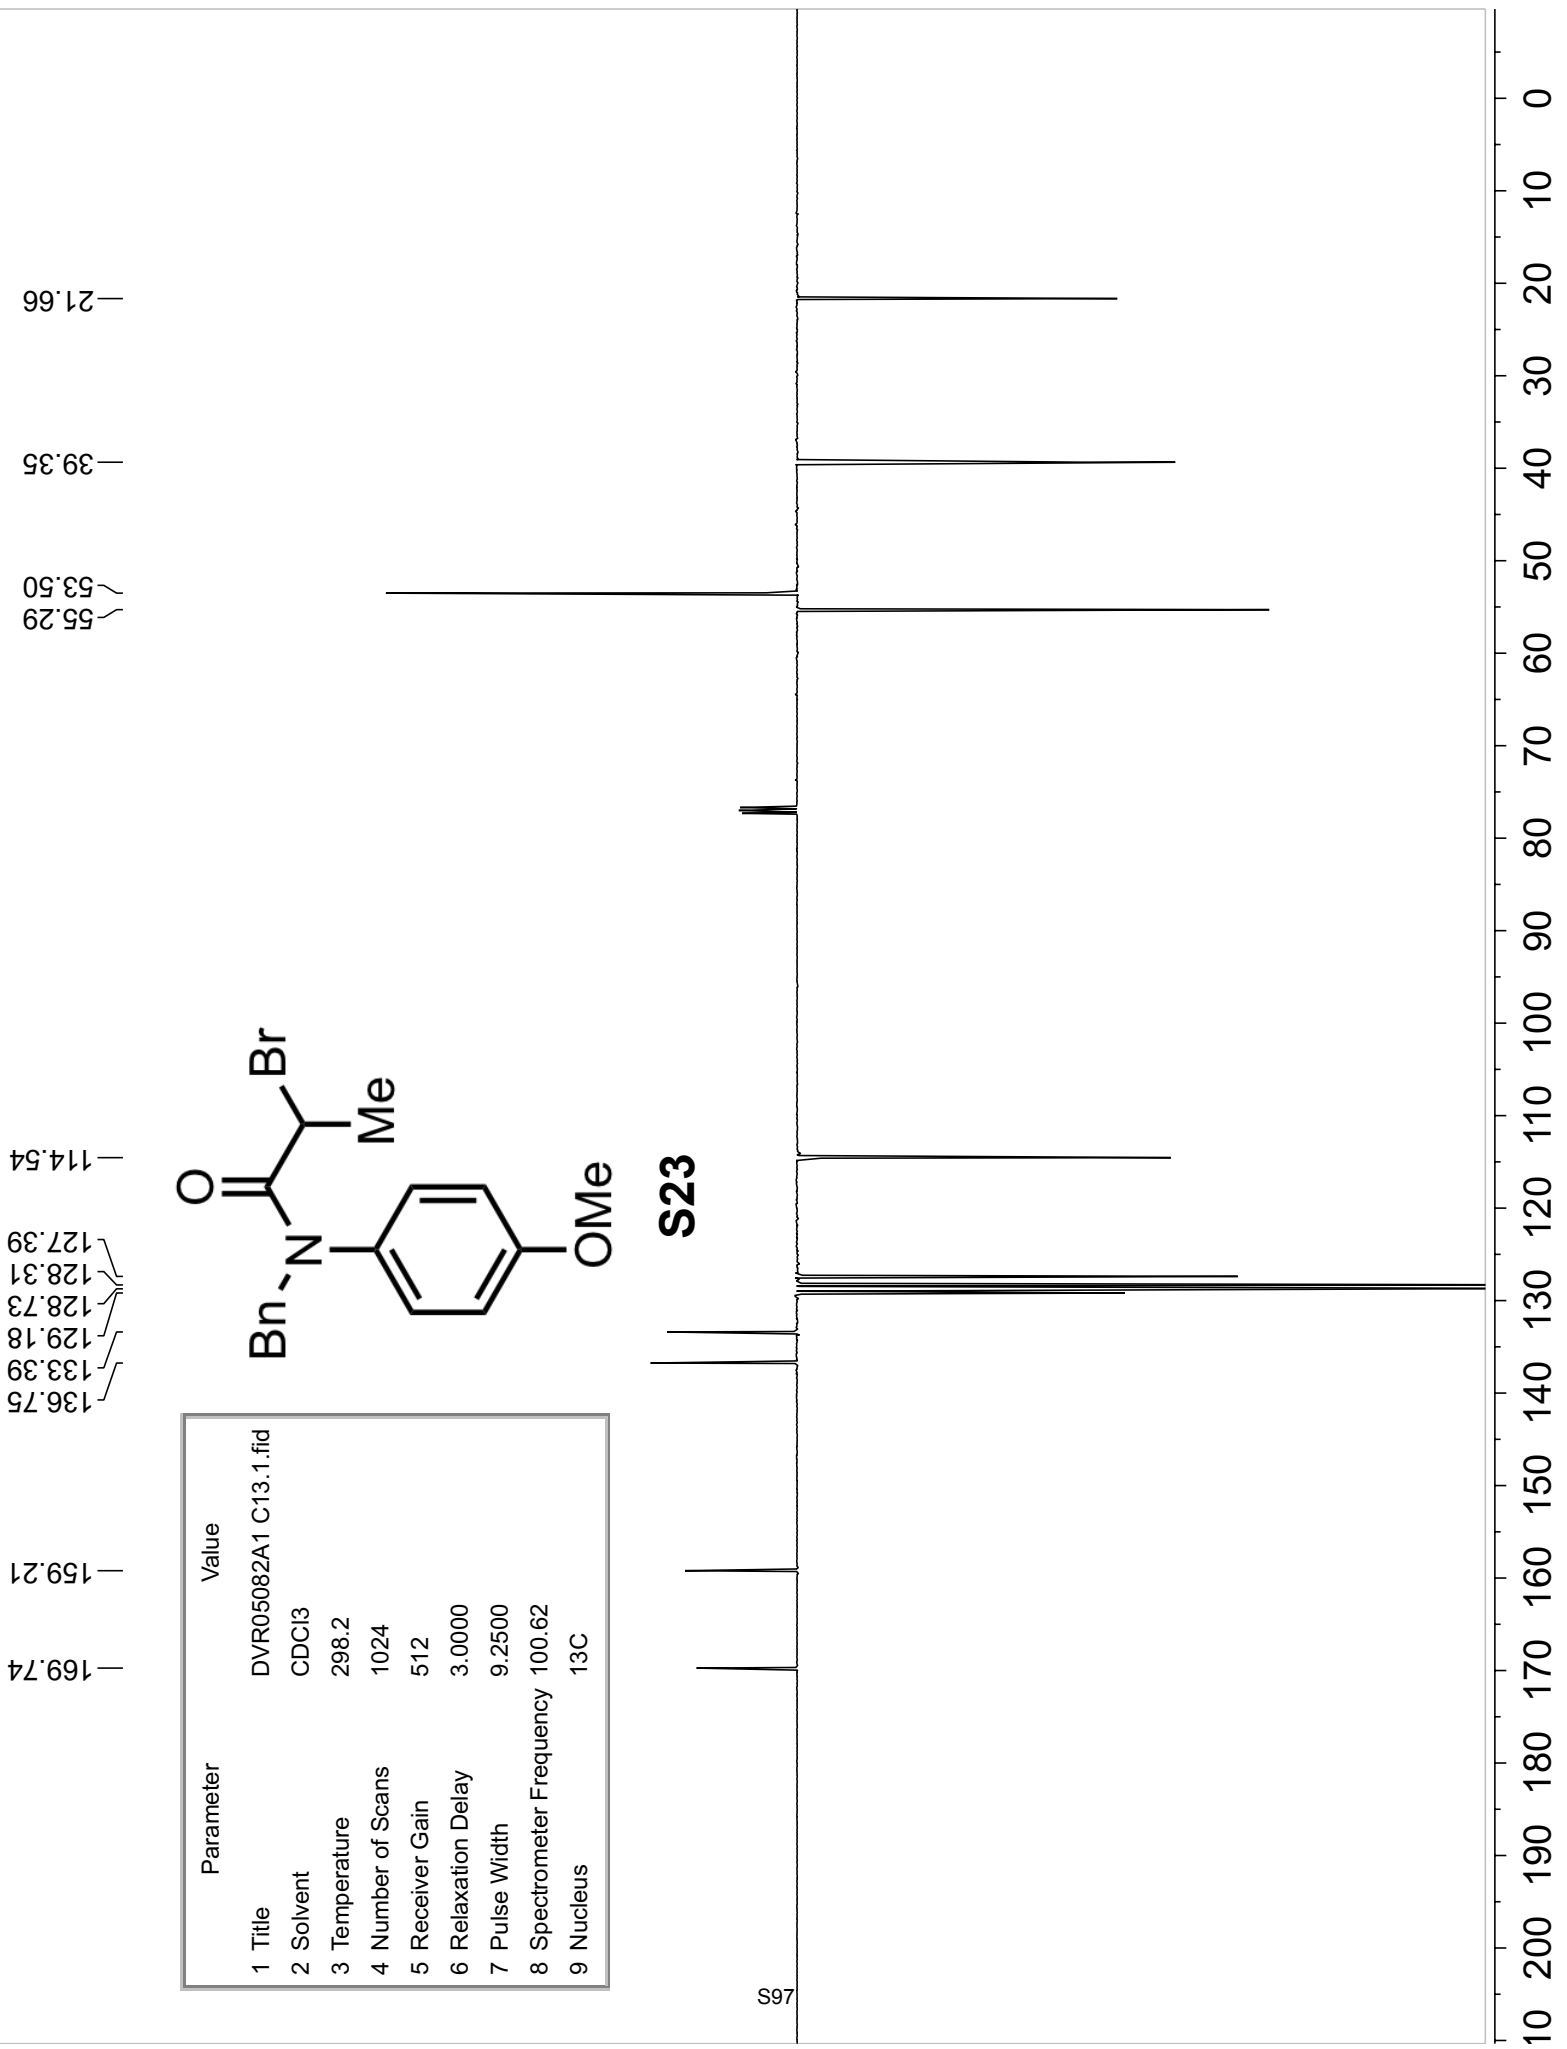

7.30  
7.29  
7.29  
7.28  
7.27  
7.27  
7.26  
7.26  
7.26  
7.25  
7.24  
7.24  
7.24  
7.24  
7.23  
7.21  
7.21  
7.20  
6.96  
6.66  
4.96  
4.93  
4.76  
4.74  
4.30  
4.29  
4.28  
4.27  
4.27  
4.26  
2.26  
1.77  
1.76  
1.75

| Parameter                | Value            |
|--------------------------|------------------|
| 1 Title                  | DVR05082C1.1.fid |
| 2 Solvent                | CDCl3            |
| 3 Temperature            | 296.9            |
| 4 Number of Scans        | 16               |
| 5 Receiver Gain          | 101              |
| 6 Relaxation Delay       | 1.0000           |
| 7 Pulse Width            | 10.7300          |
| 8 Spectrometer Frequency | 600.32           |
| 9 Nucleus                | <sup>1</sup> H   |

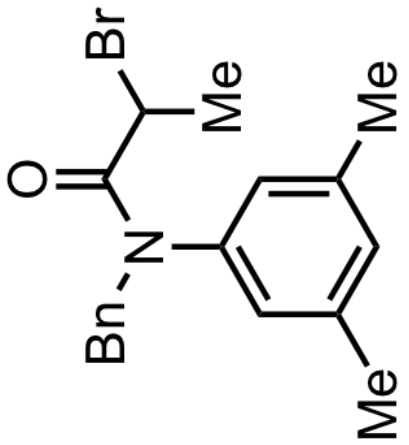

**S25**

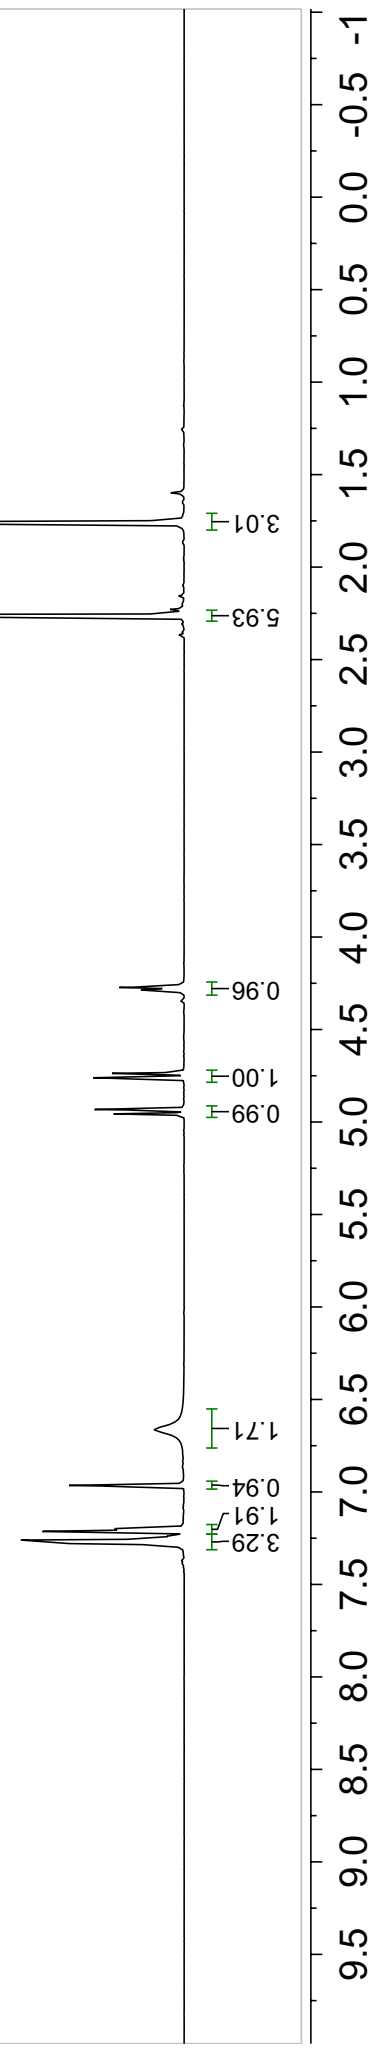



169.49  
140.88  
139.28  
136.84  
130.07  
128.62  
128.25  
127.33  
125.50  
53.48  
39.55  
21.80  
21.04

| Parameter                | Value                |
|--------------------------|----------------------|
| 1 Title                  | DVR05082C1 C13.1.fid |
| 2 Solvent                | CDCl3                |
| 3 Temperature            | 298.2                |
| 4 Number of Scans        | 1024                 |
| 5 Receiver Gain          | 512                  |
| 6 Relaxation Delay       | 3.0000               |
| 7 Pulse Width            | 9.2500               |
| 8 Spectrometer Frequency | 100.62               |
| 9 Nucleus                | <sup>13</sup> C      |

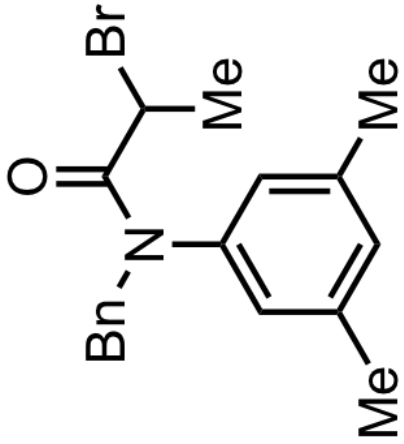

S25

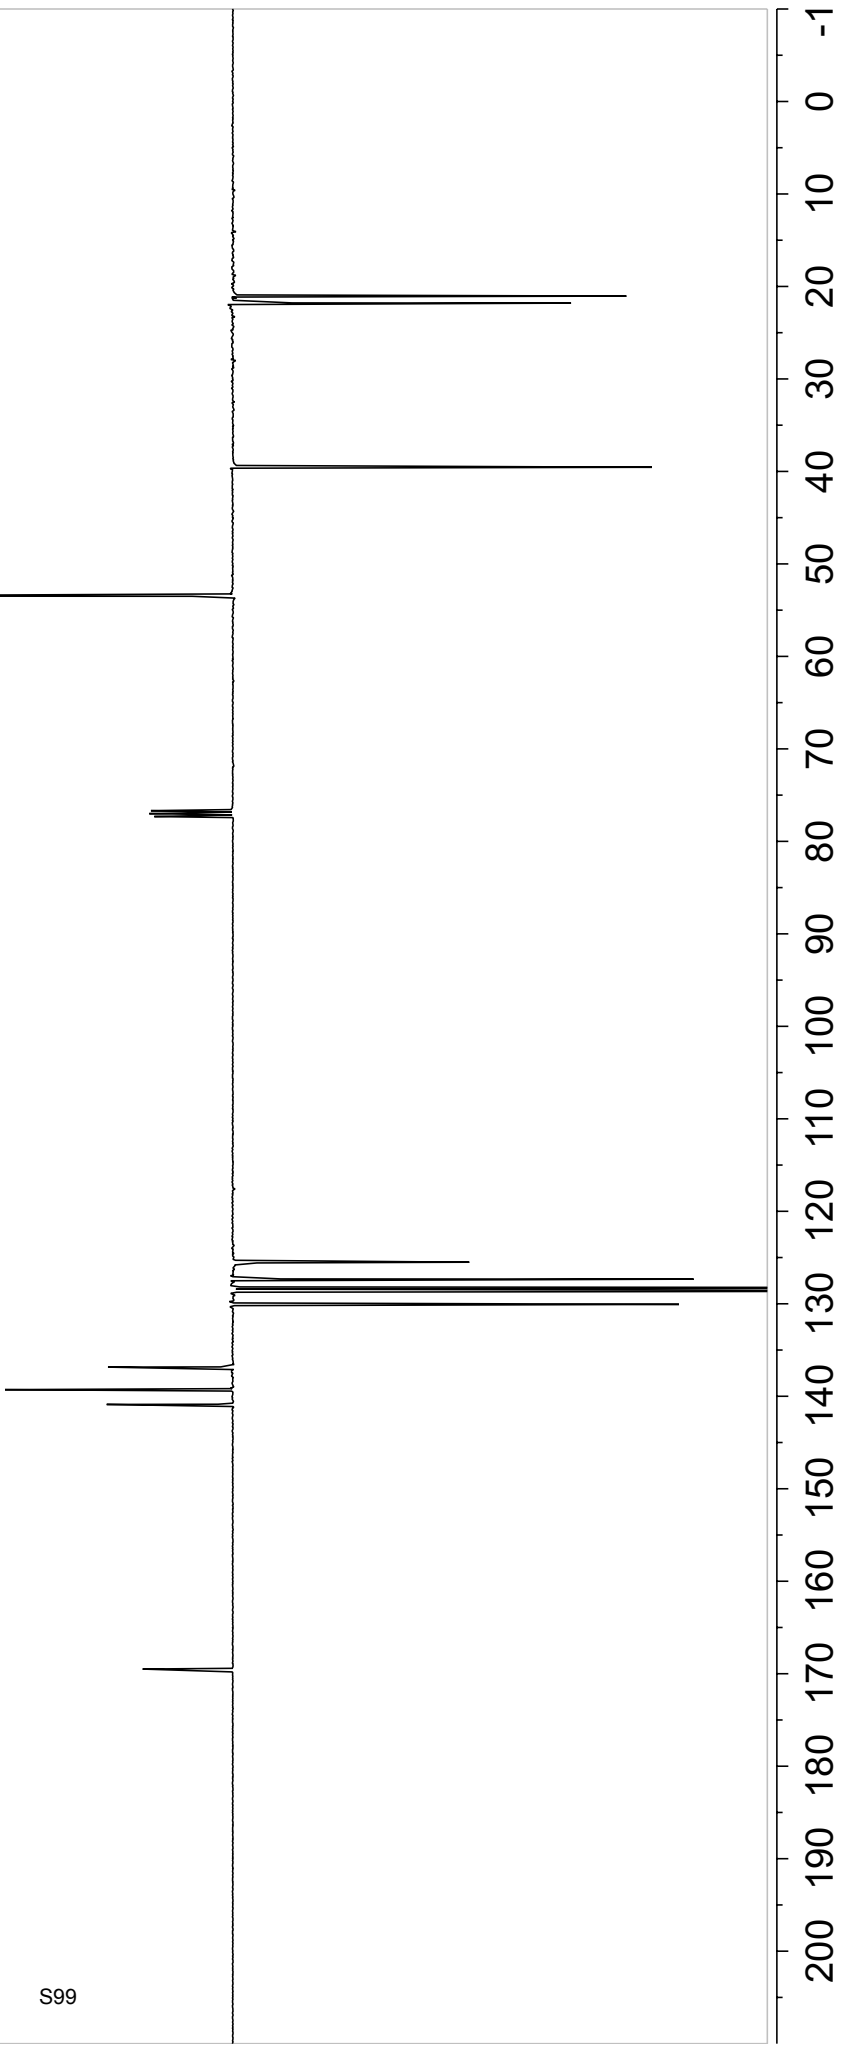

7.63  
7.62  
7.31  
7.30  
7.29  
7.28  
7.28  
7.27  
7.22  
7.20  
7.19  
7.19  
7.18  
7.17  
5.01  
4.99  
4.81  
4.79  
4.15  
4.14  
4.13  
4.12  
1.79  
1.78

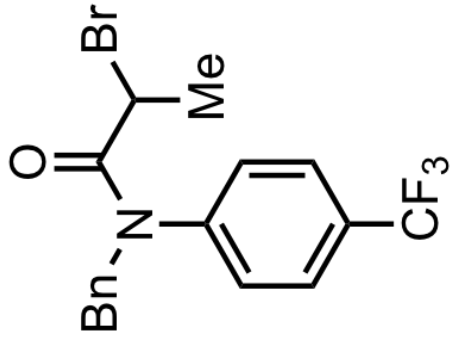

| Parameter                | Value           |
|--------------------------|-----------------|
| 1 Title                  | DVR05082B.1.fid |
| 2 Solvent                | CDCl3           |
| 3 Temperature            | 296.9           |
| 4 Number of Scans        | 16              |
| 5 Receiver Gain          | 128             |
| 6 Relaxation Delay       | 1.0000          |
| 7 Pulse Width            | 10.7300         |
| 8 Spectrometer Frequency | 600.32          |
| 9 Nucleus                | <sup>1</sup> H  |

**S27**

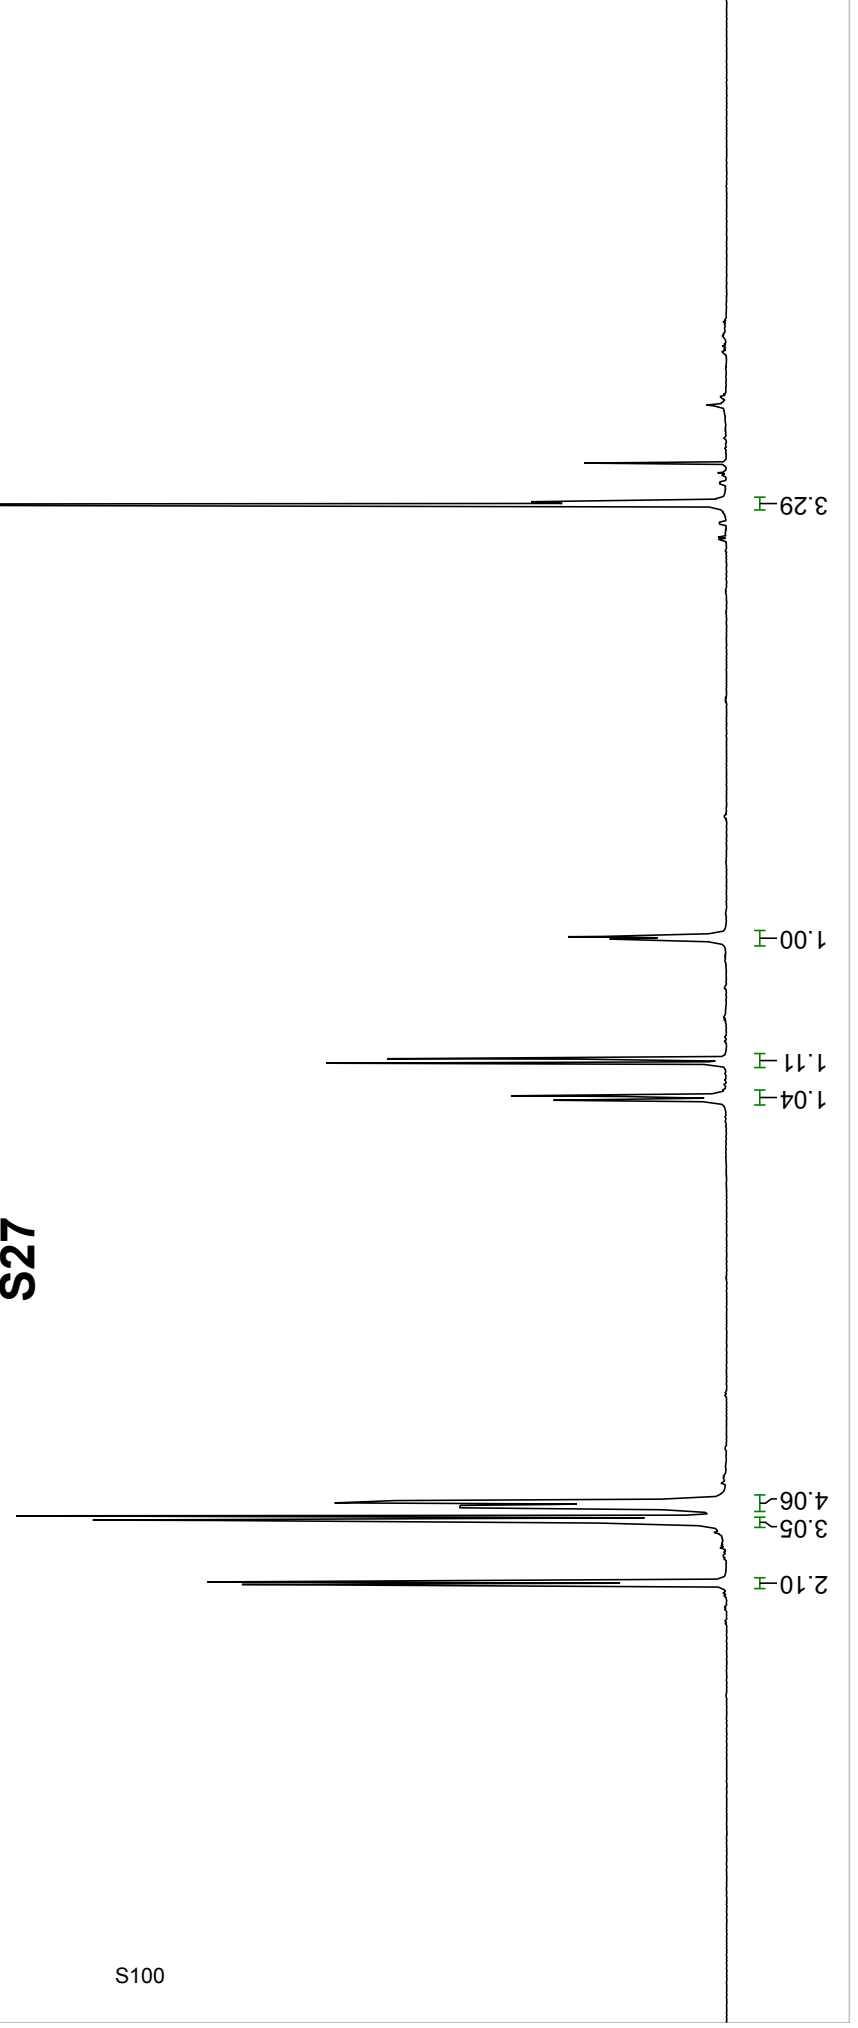

169.17  
144.17  
136.28  
131.27  
130.94  
130.61  
130.28  
128.93  
128.75  
128.68  
127.89  
127.62  
126.91  
126.87  
124.92  
122.21  
119.50

| Parameter                | Value               |
|--------------------------|---------------------|
| 1 Title                  | DVR05082B C13.1.fid |
| 2 Solvent                | CDCl3               |
| 3 Temperature            | 298.1               |
| 4 Number of Scans        | 1024                |
| 5 Receiver Gain          | 512                 |
| 6 Relaxation Delay       | 3.0000              |
| 7 Pulse Width            | 9.2500              |
| 8 Spectrometer Frequency | 100.62              |
| 9 Nucleus                | 13C                 |

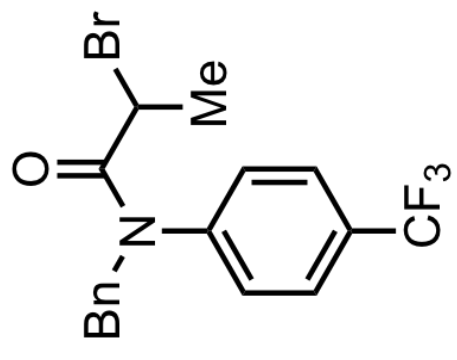

**S27**

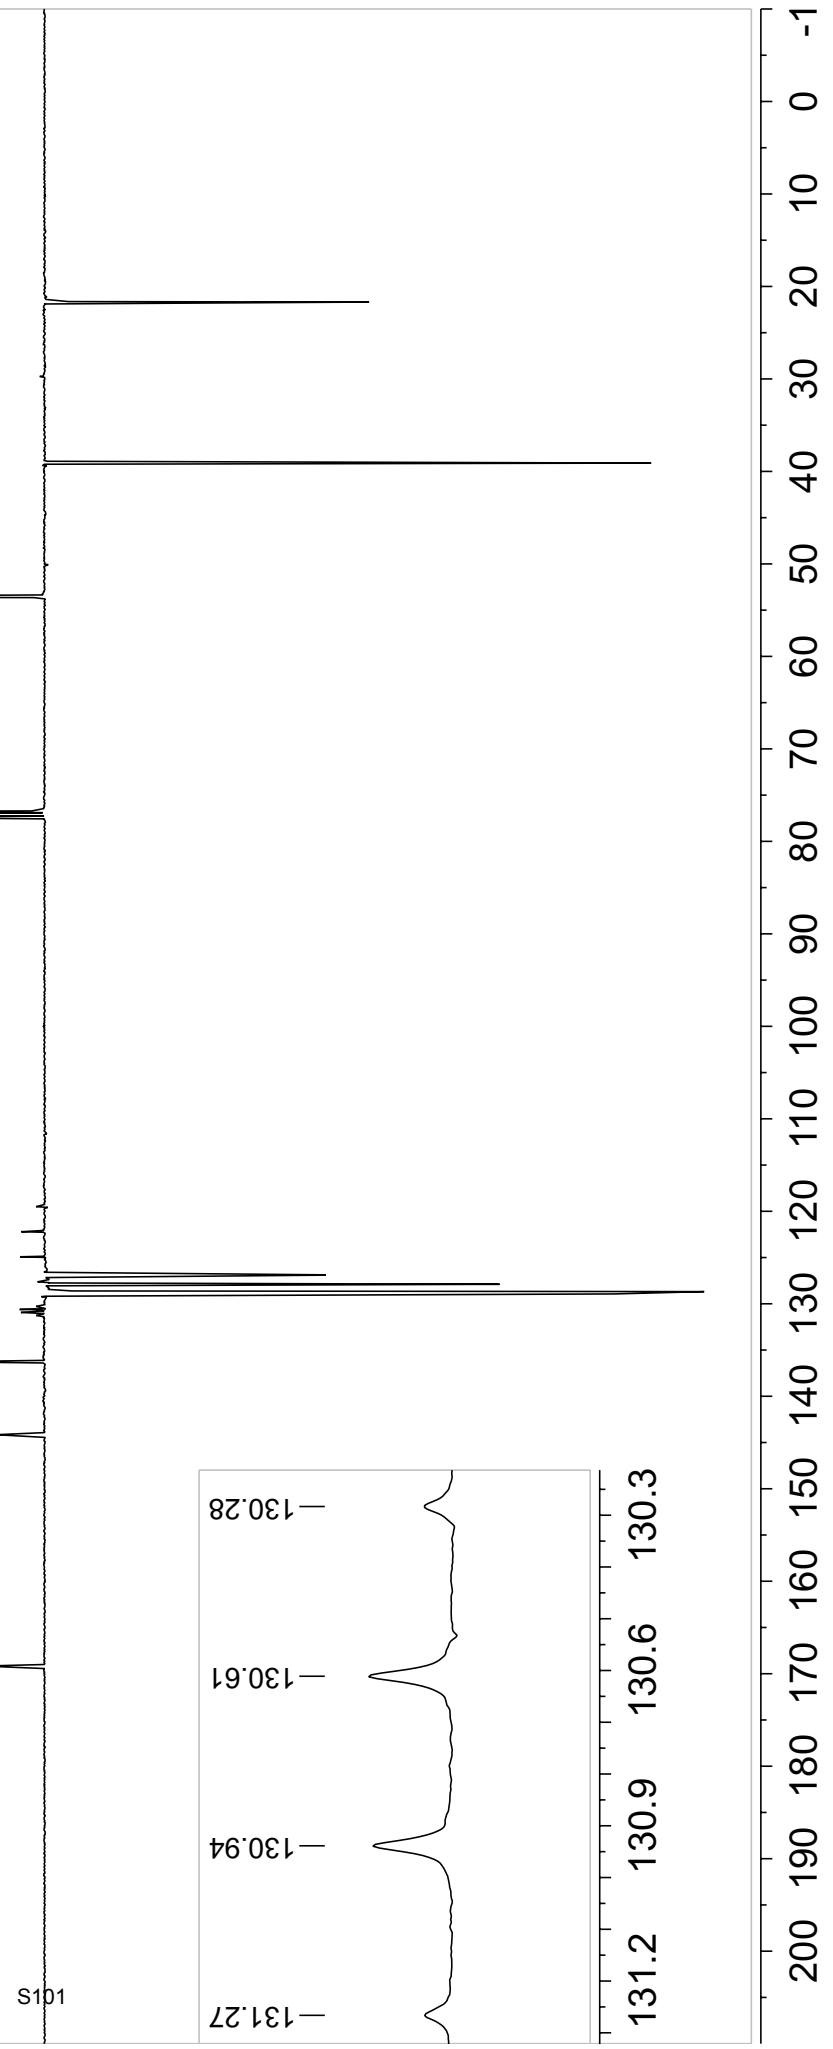

| Parameter                | Value               |
|--------------------------|---------------------|
| 1 Title                  | DVR05082B F19.1.fid |
| 2 Solvent                | CDCI3               |
| 3 Temperature            | 297.6               |
| 4 Number of Scans        | 16                  |
| 5 Receiver Gain          | 203                 |
| 6 Relaxation Delay       | 3.0000              |
| 7 Pulse Width            | 11.6000             |
| 8 Spectrometer Frequency | 564.81              |
| 9 Nucleus                | <sup>19</sup> F     |

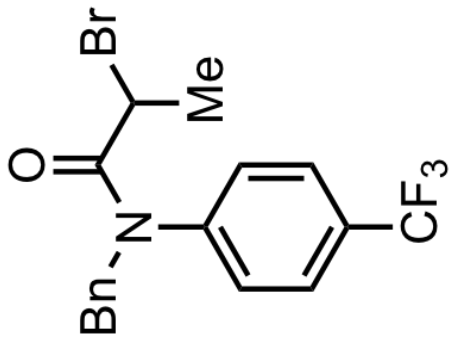

**S27**

-62.64

-5 -10 -15 -20 -25 -30 -35 -40 -45 -50 -55 -60 -65 -70 -75 -80 -85 -90 -95 -100

| Parameter                | Value             |
|--------------------------|-------------------|
| 1 Title                  | DVR04180AF1.1.fid |
| 2 Solvent                | CDCI3             |
| 3 Temperature            | 300.0             |
| 4 Number of Scans        | 16                |
| 5 Receiver Gain          | 128               |
| 6 Relaxation Delay       | 1.0000            |
| 7 Pulse Width            | 10.7300           |
| 8 Spectrometer Frequency | 600.32            |
| 9 Nucleus                | <sup>1</sup> H    |

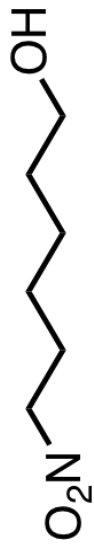

**S29**

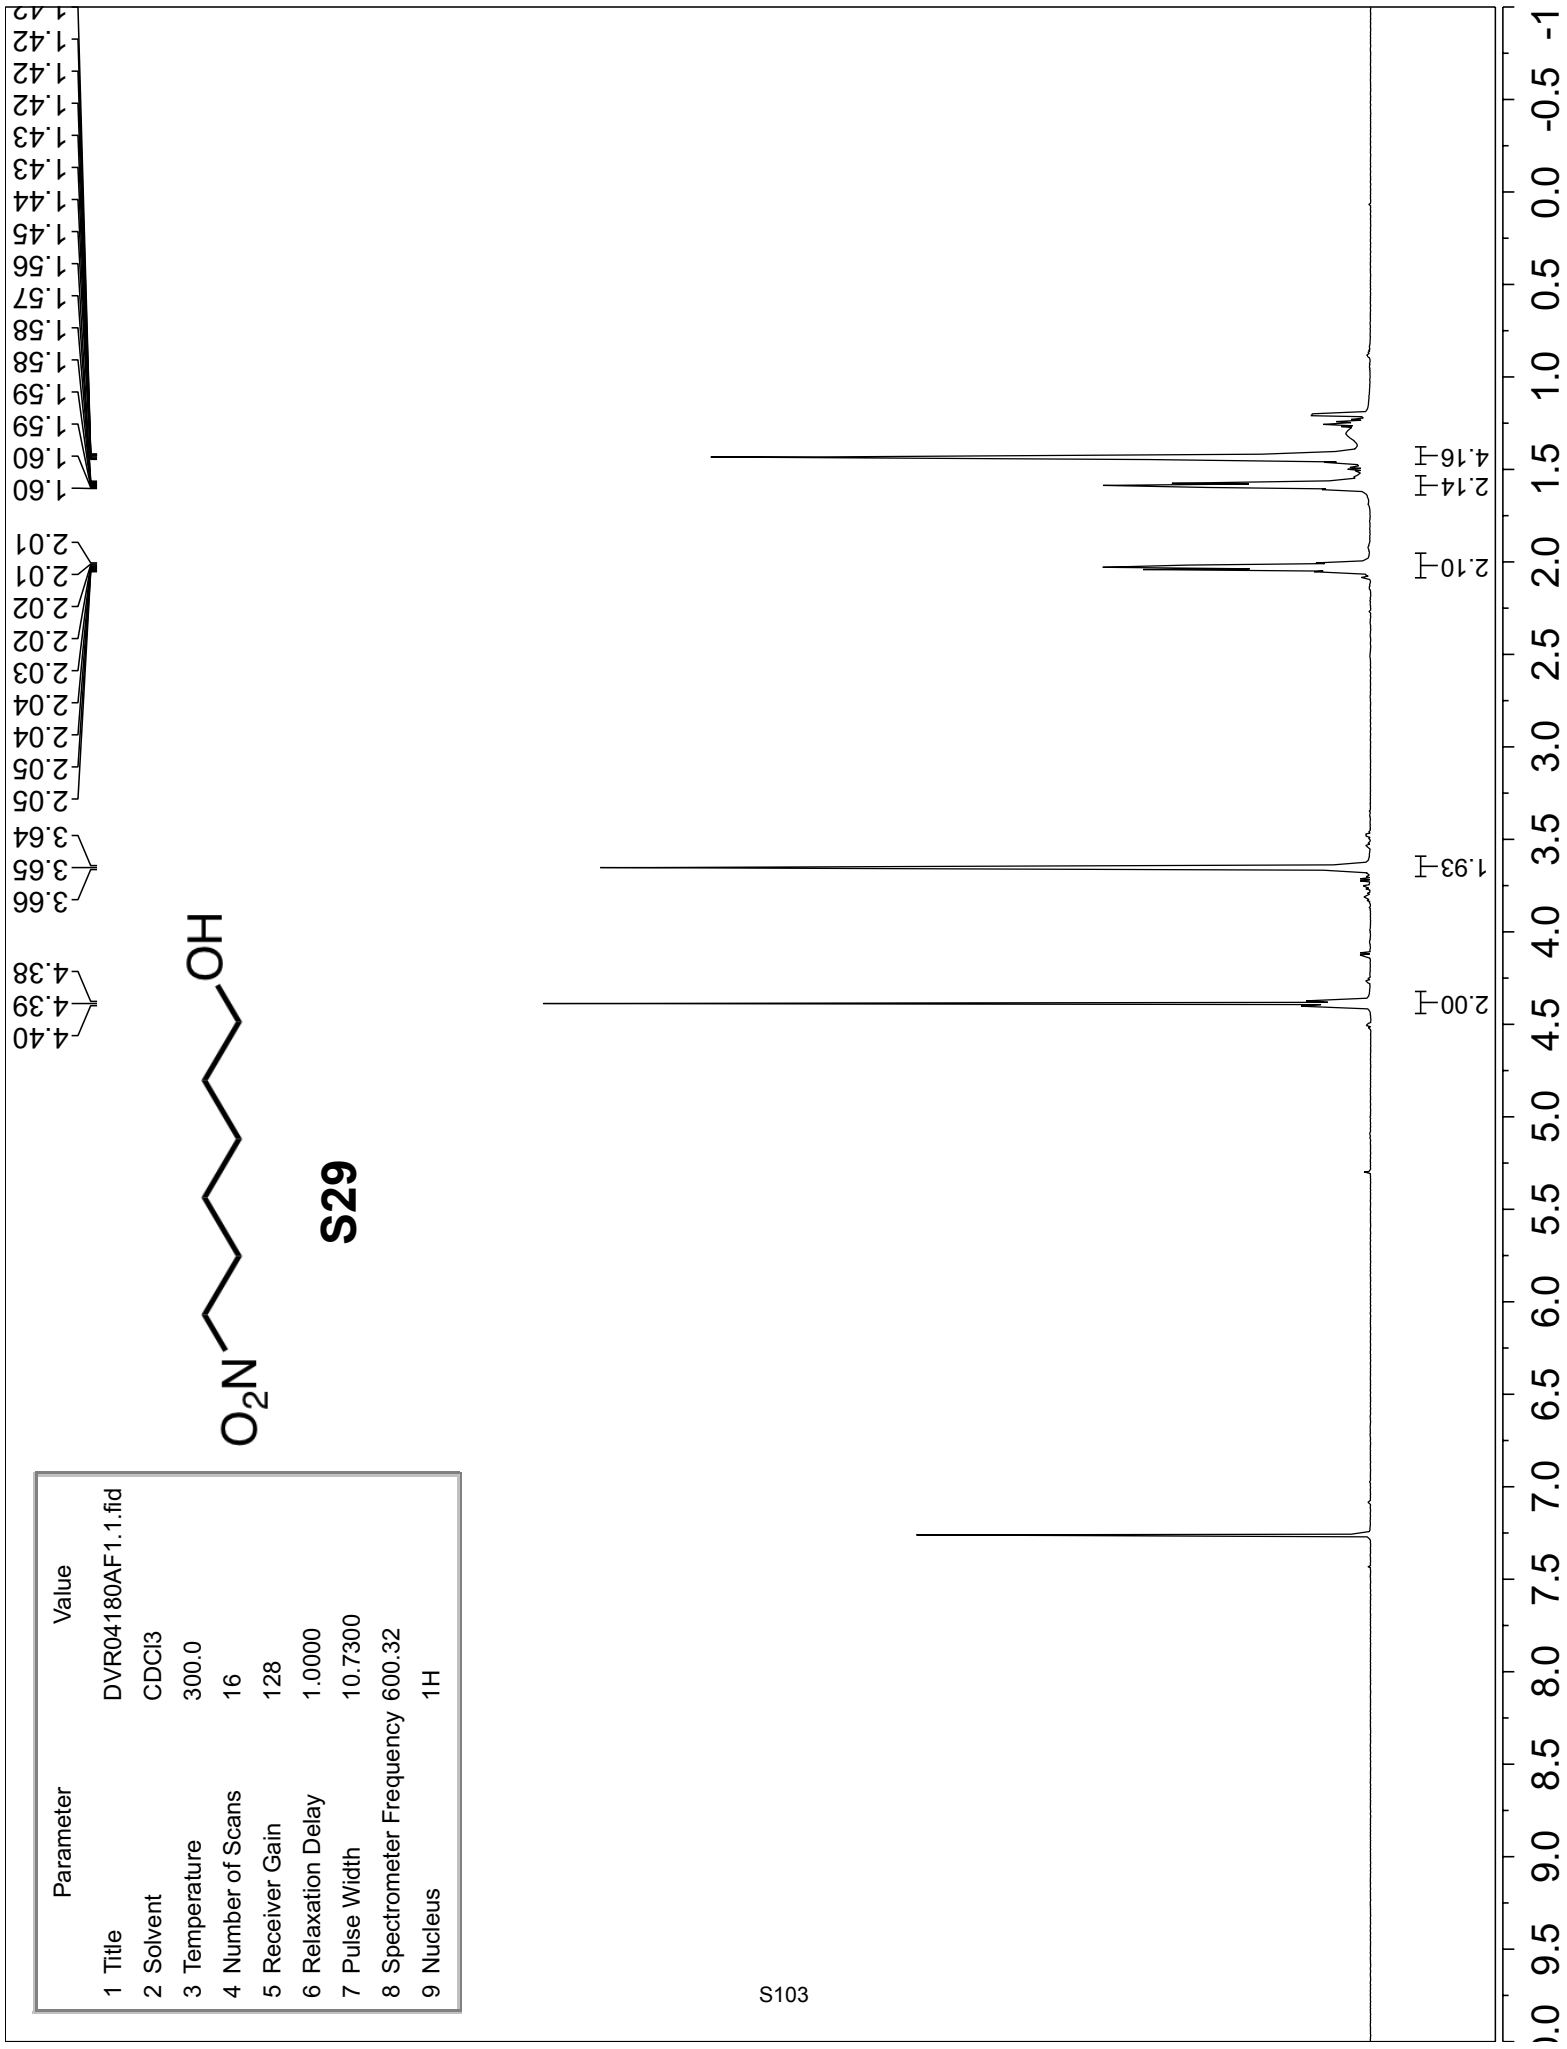

| Parameter                | Value                 |
|--------------------------|-----------------------|
| 1 Title                  | DVR04180AF1 C13.1.fid |
| 2 Solvent                | CDCl3                 |
| 3 Temperature            | 300.0                 |
| 4 Number of Scans        | 1024                  |
| 5 Receiver Gain          | 2050                  |
| 6 Relaxation Delay       | 5.0000                |
| 7 Pulse Width            | 10.6300               |
| 8 Spectrometer Frequency | 150.97                |
| 9 Nucleus                | <sup>13</sup> C       |

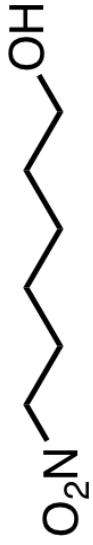

**S29**

32.18  
27.25  
25.97  
25.00

75.54  
62.43

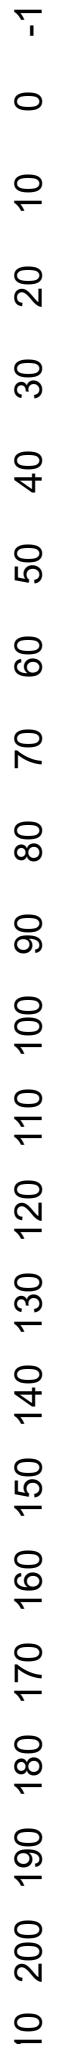

Parameter Value

1 Title DVR04263ACRD.1.fid  
2 Solvent CDCl3  
3 Temperature 297.5  
4 Number of Scans 16  
5 Receiver Gain 101  
6 Relaxation Delay 1.0000  
7 Pulse Width 10.7700  
8 Spectrometer Frequency 600.32  
9 Nucleus 1H

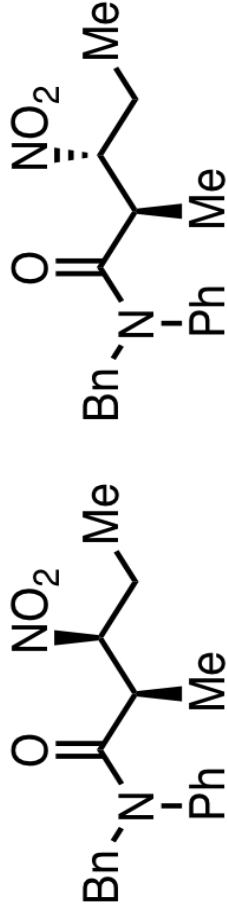

Crude

1A

75:25

1B

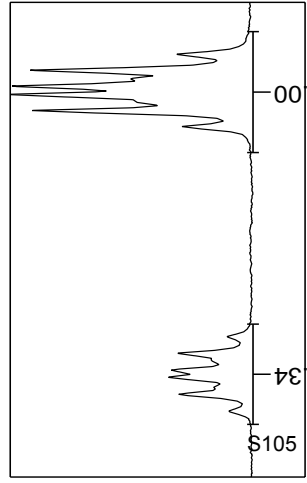

3.10 3.00 2.90 2.80

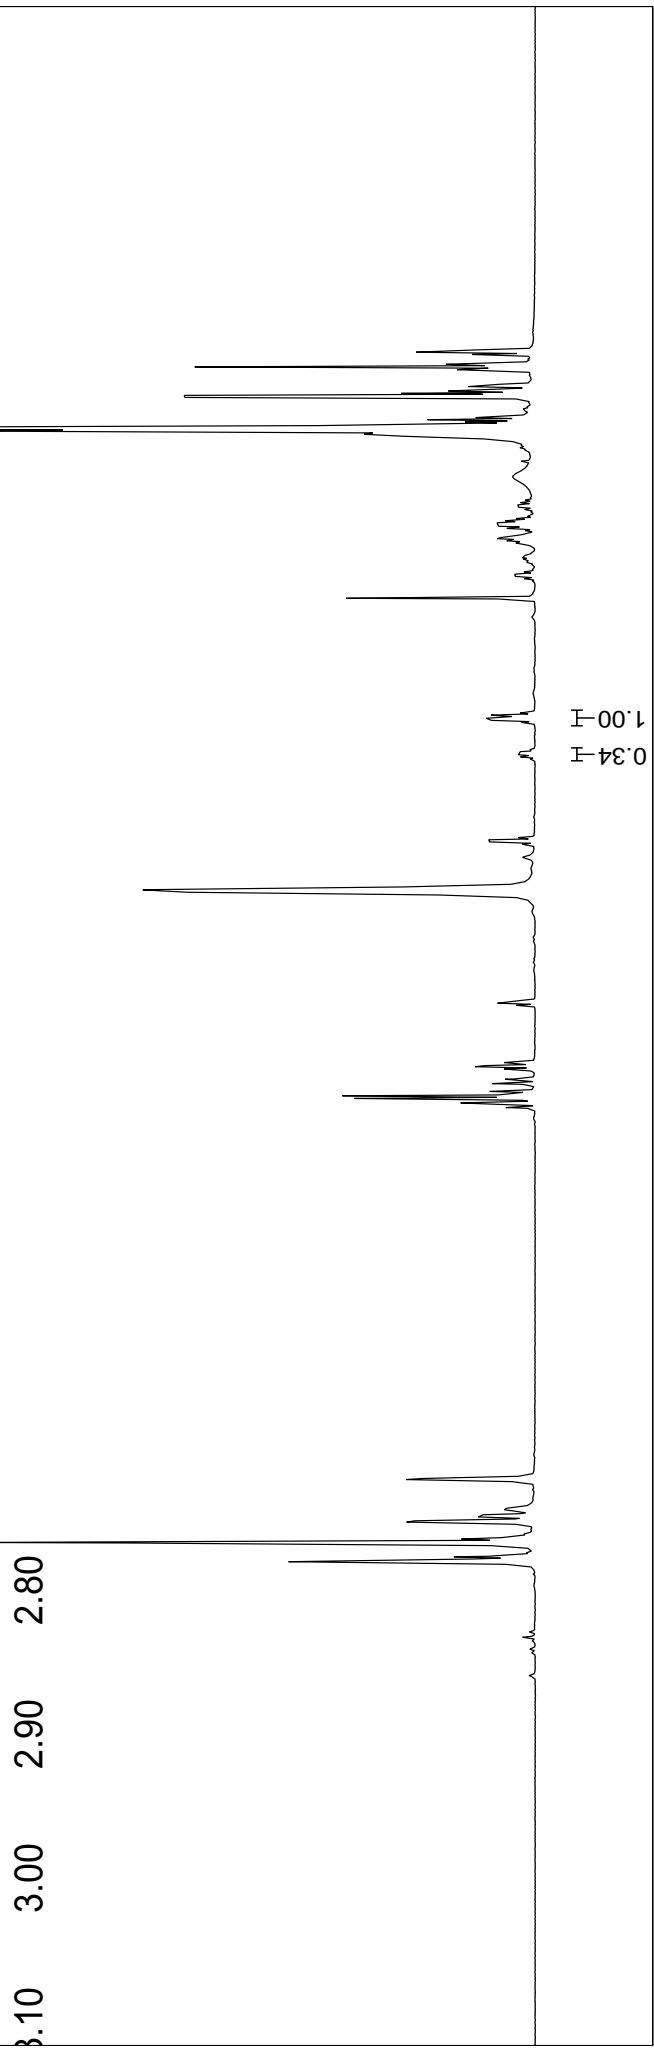

1.0 9.5 9.0 8.5 8.0 7.5 7.0 6.5 6.0 5.5 5.0 4.5 4.0 3.5 3.0 2.5 2.0 1.5 1.0 0.5 0.0 -0.5 -1.0

| Parameter                | Value            |
|--------------------------|------------------|
| 1 Title                  | DVR04135F1.1.fid |
| 2 Solvent                | CDCl3            |
| 3 Temperature            | 298.6            |
| 4 Number of Scans        | 16               |
| 5 Receiver Gain          | 181              |
| 6 Relaxation Delay       | 1.0000           |
| 7 Pulse Width            | 10.7700          |
| 8 Spectrometer Frequency | 600.32           |
| 9 Nucleus                | <sup>1</sup> H   |

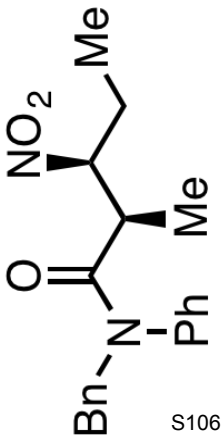

1A

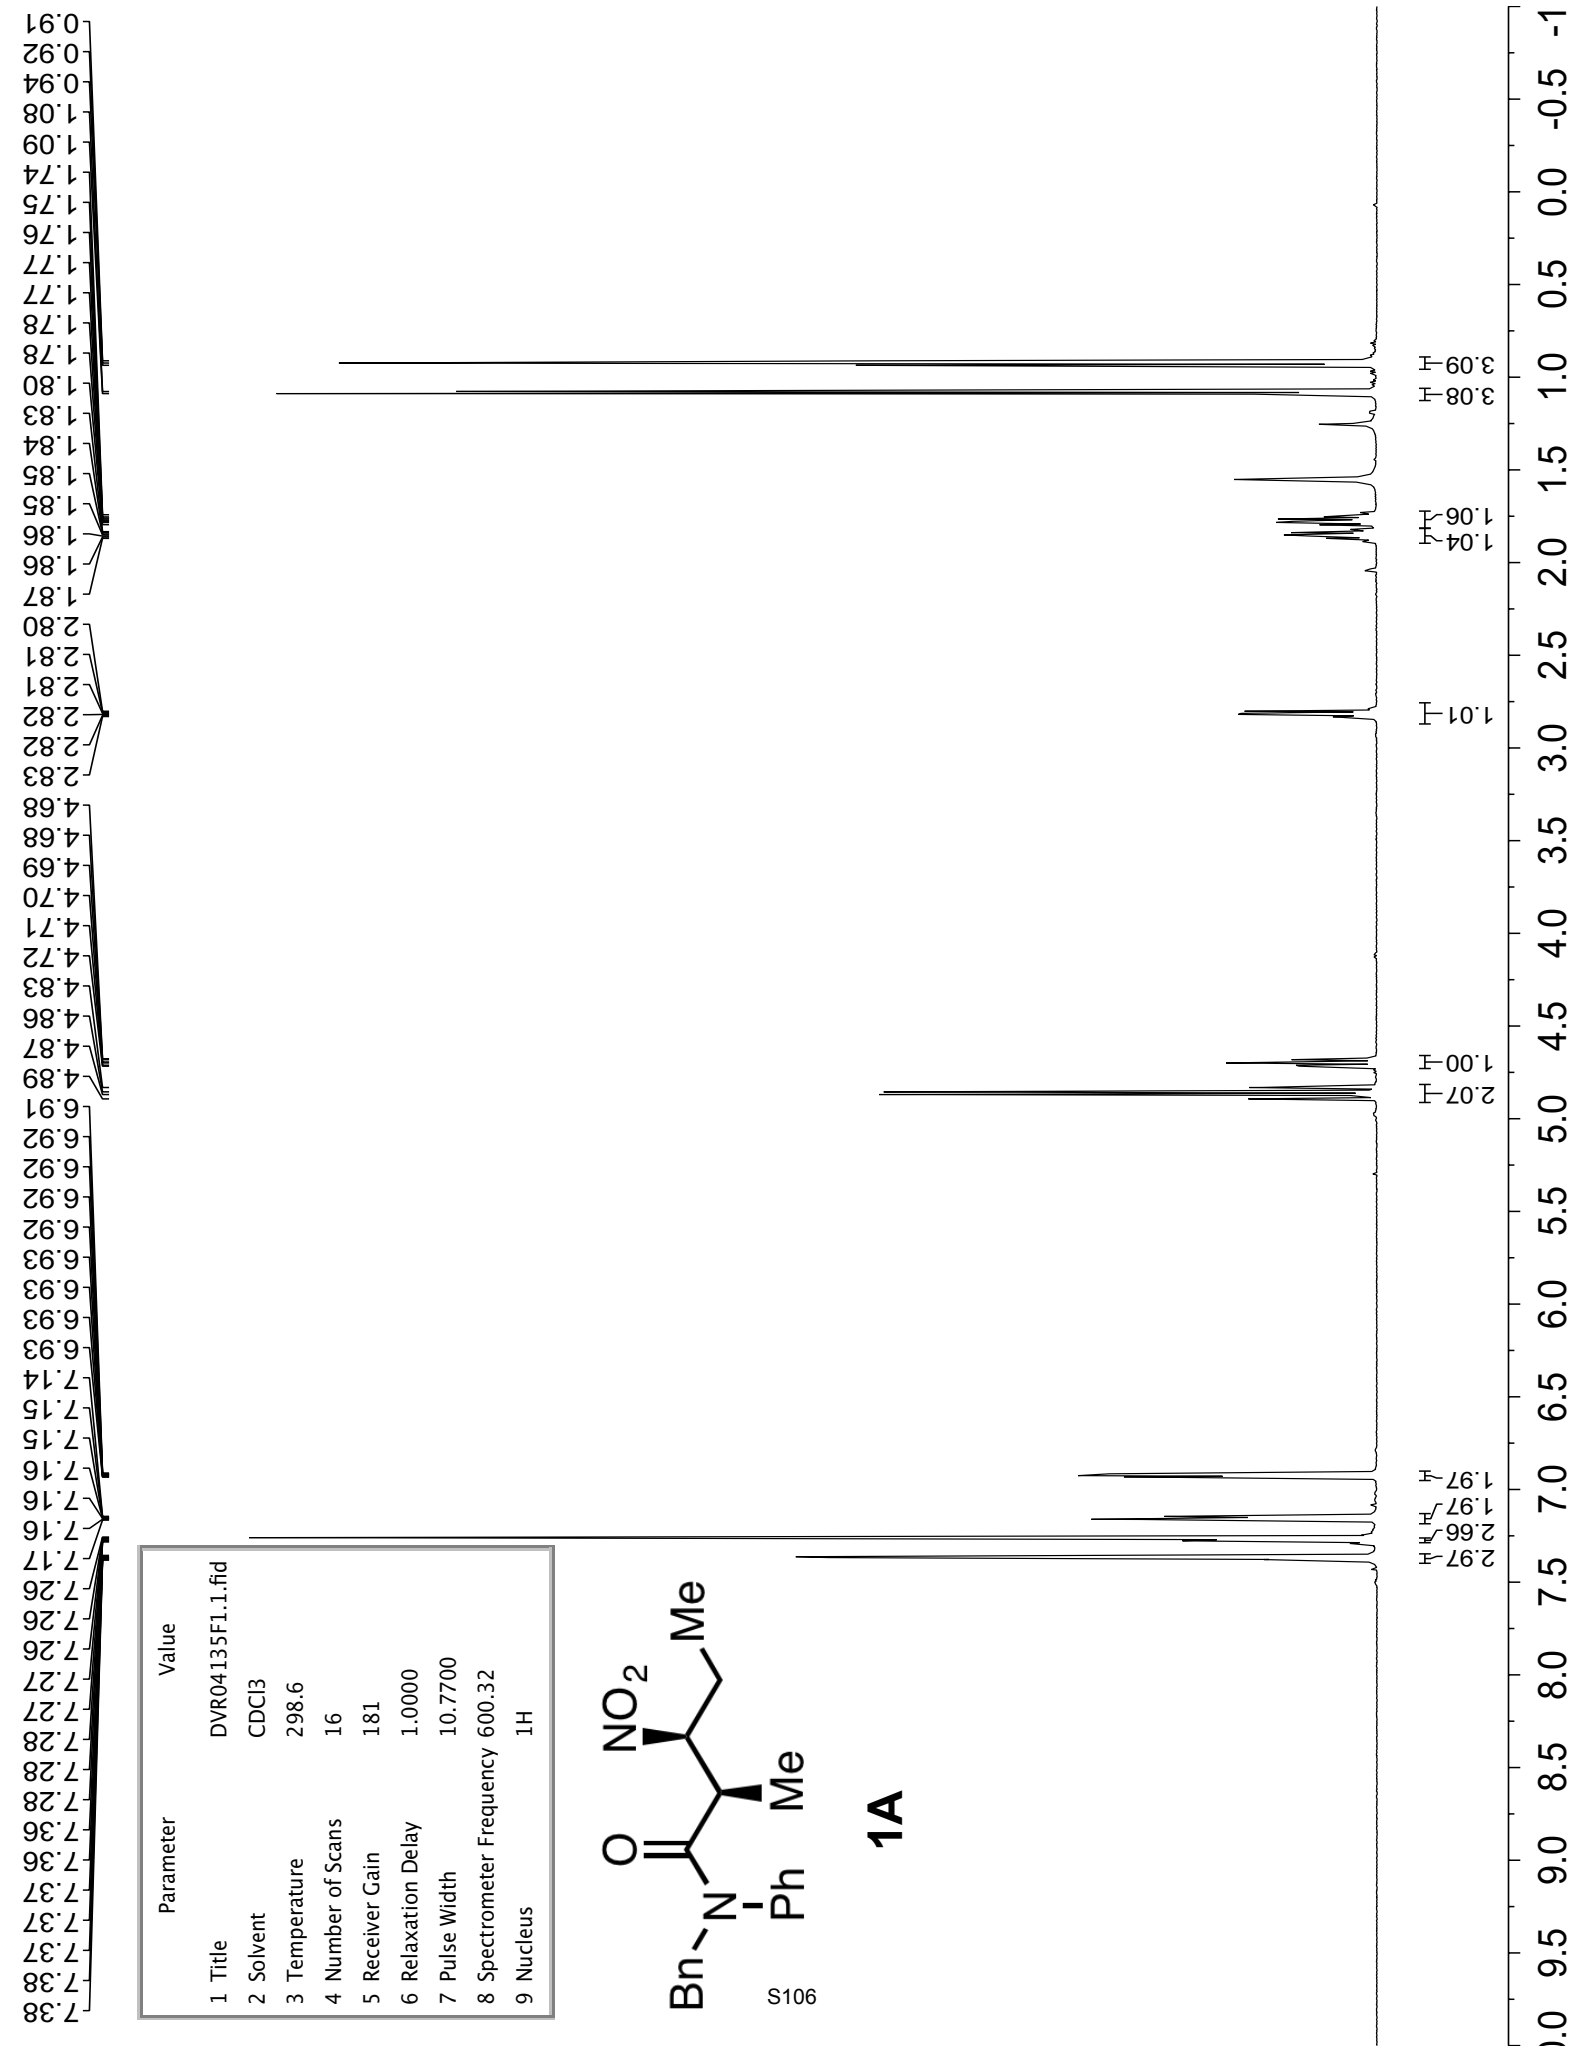



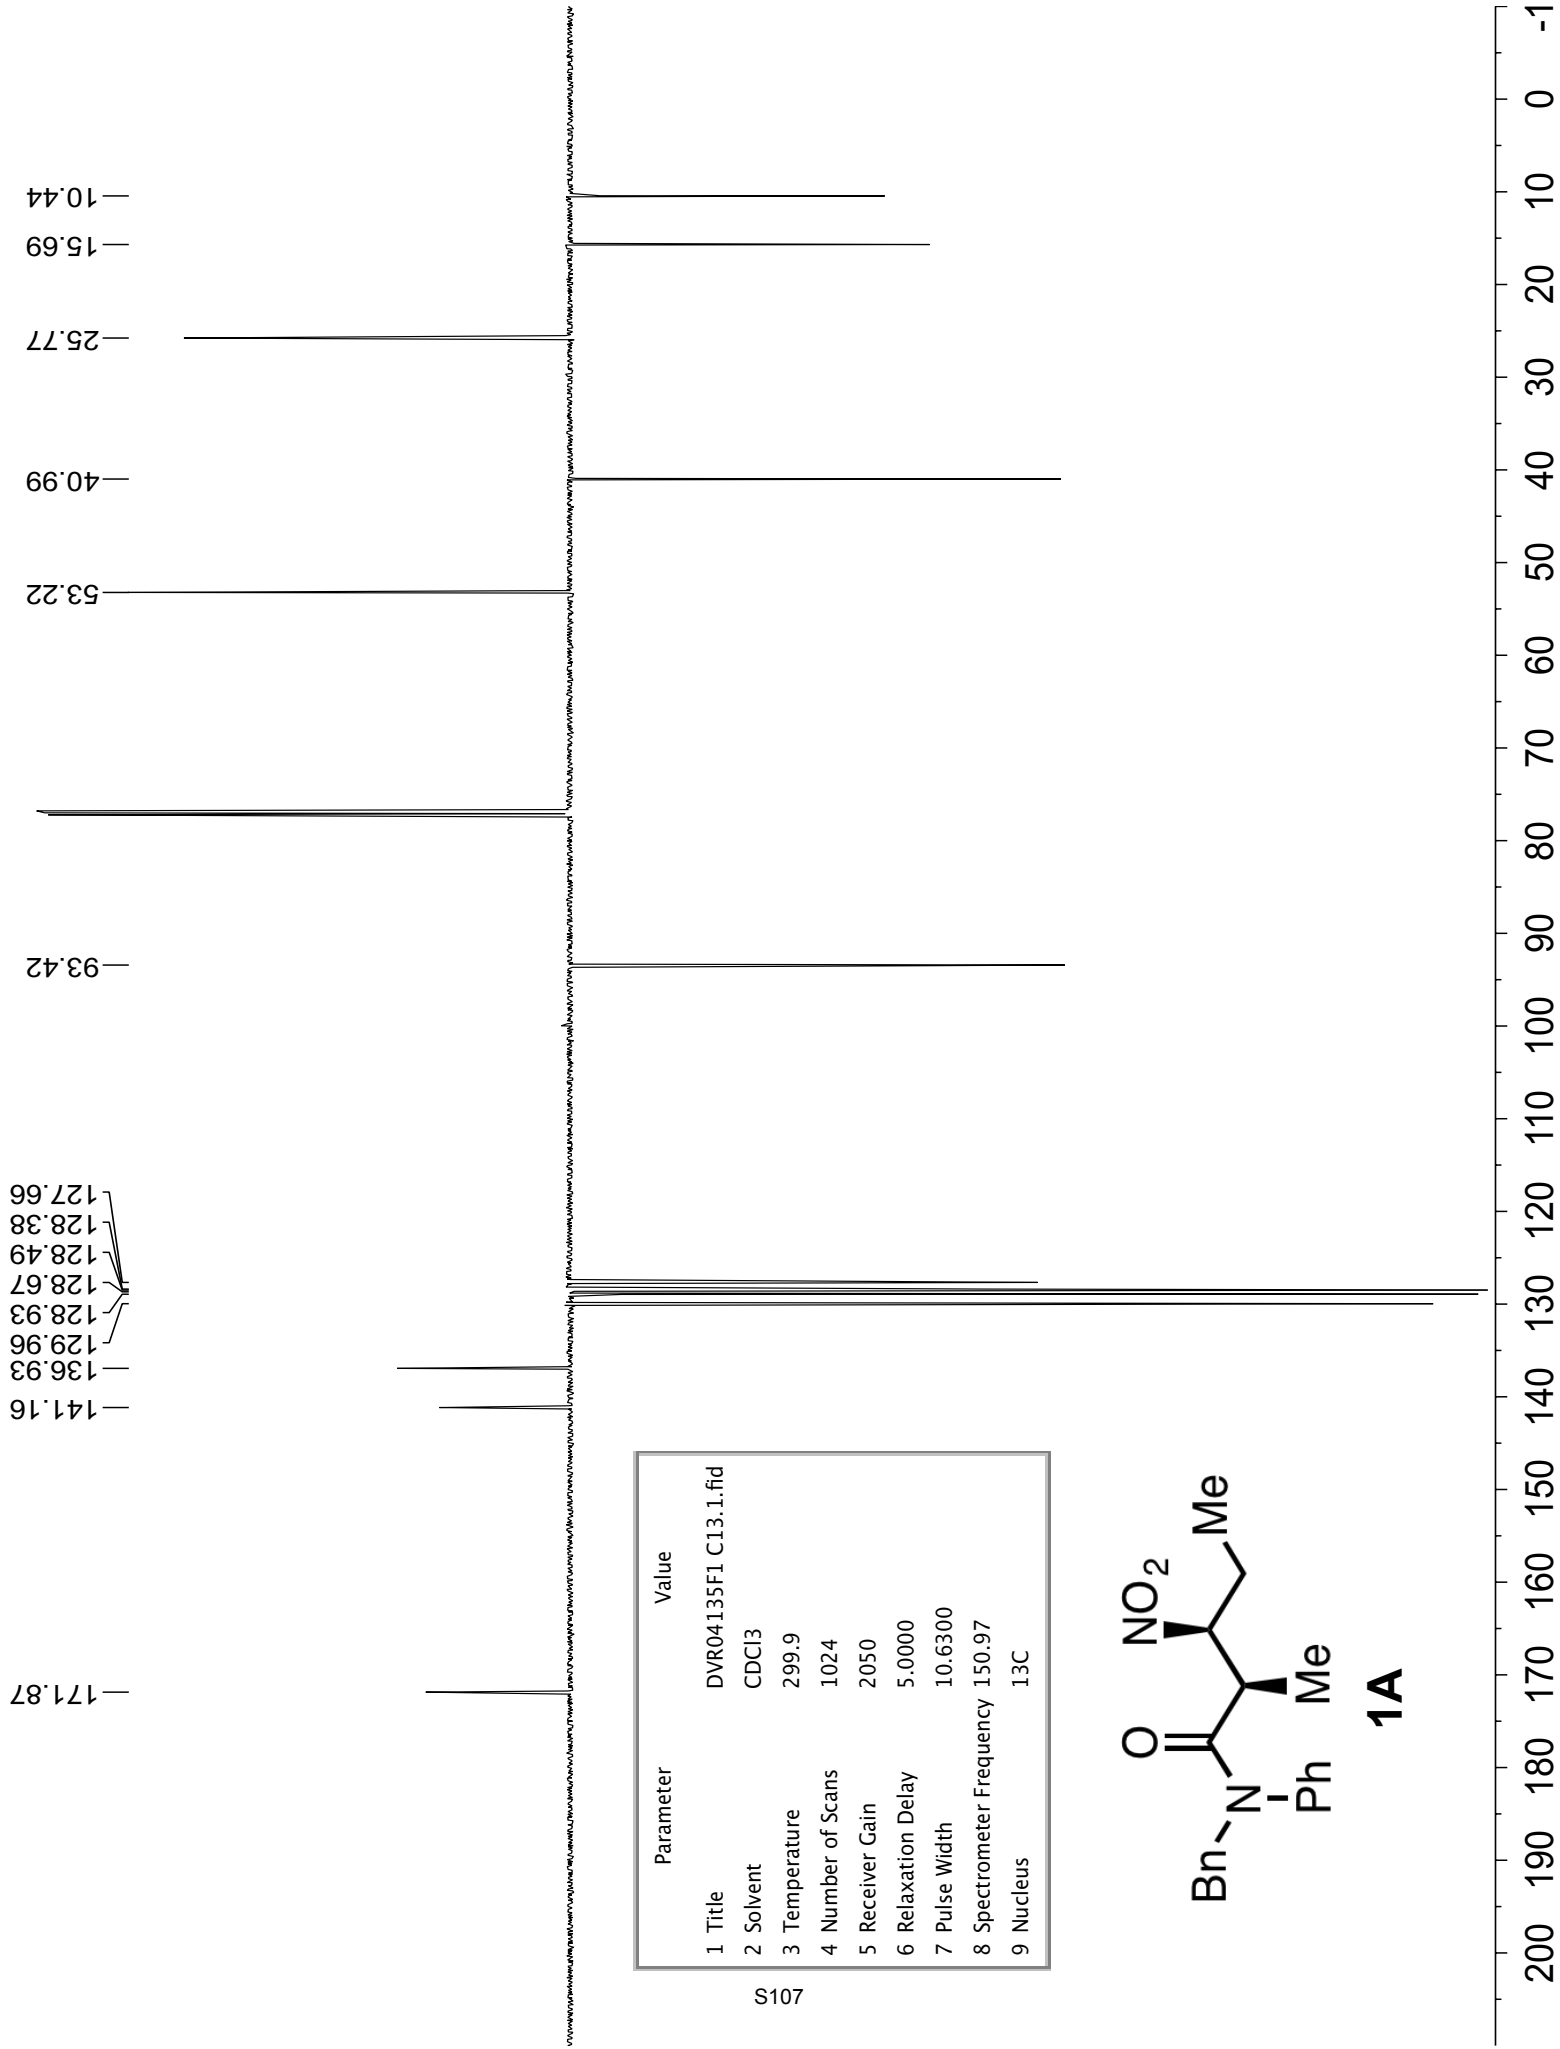

7.36  
7.35  
7.35  
7.35  
7.34  
7.34  
7.34  
7.34  
7.34  
7.34  
7.33  
7.27  
7.27  
7.26  
7.26  
7.26  
7.25  
7.25  
7.25  
7.24  
7.24  
7.24  
7.23  
7.23  
7.13  
7.13  
7.12  
7.12  
7.12  
7.11  
7.09  
7.09  
7.08  
7.08  
4.92  
4.89  
4.88  
4.87  
4.86  
4.86  
4.85  
4.85  
4.84  
4.84  
4.79  
4.77  
3.03  
3.03  
3.01  
3.01  
1.97  
1.97  
1.96  
1.95  
1.95  
1.94  
1.93  
1.69  
1.68  
1.68  
1.67  
1.67  
1.66  
1.66  
1.64  
1.07  
1.05  
0.86  
0.85  
0.83

| Parameter                | Value            |
|--------------------------|------------------|
| 1 Title                  | DVR04135F2.1.fid |
| 2 Solvent                | CDCl3            |
| 3 Temperature            | 298.3            |
| 4 Number of Scans        | 16               |
| 5 Receiver Gain          | 256              |
| 6 Relaxation Delay       | 1.0000           |
| 7 Pulse Width            | 10.7700          |
| 8 Spectrometer Frequency | 600.32           |
| 9 Nucleus                | 1H               |

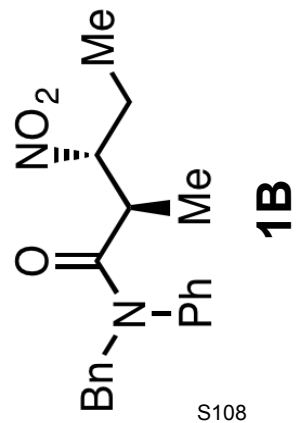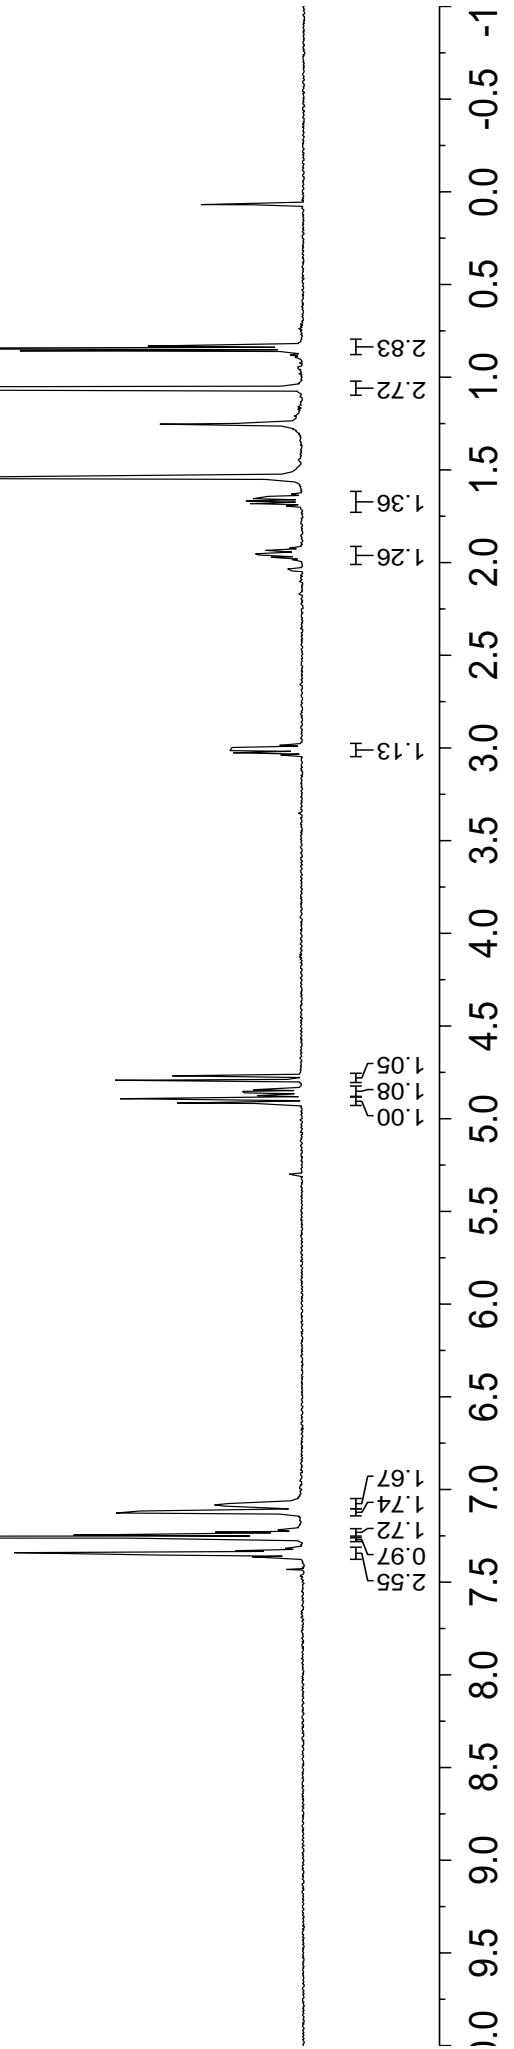

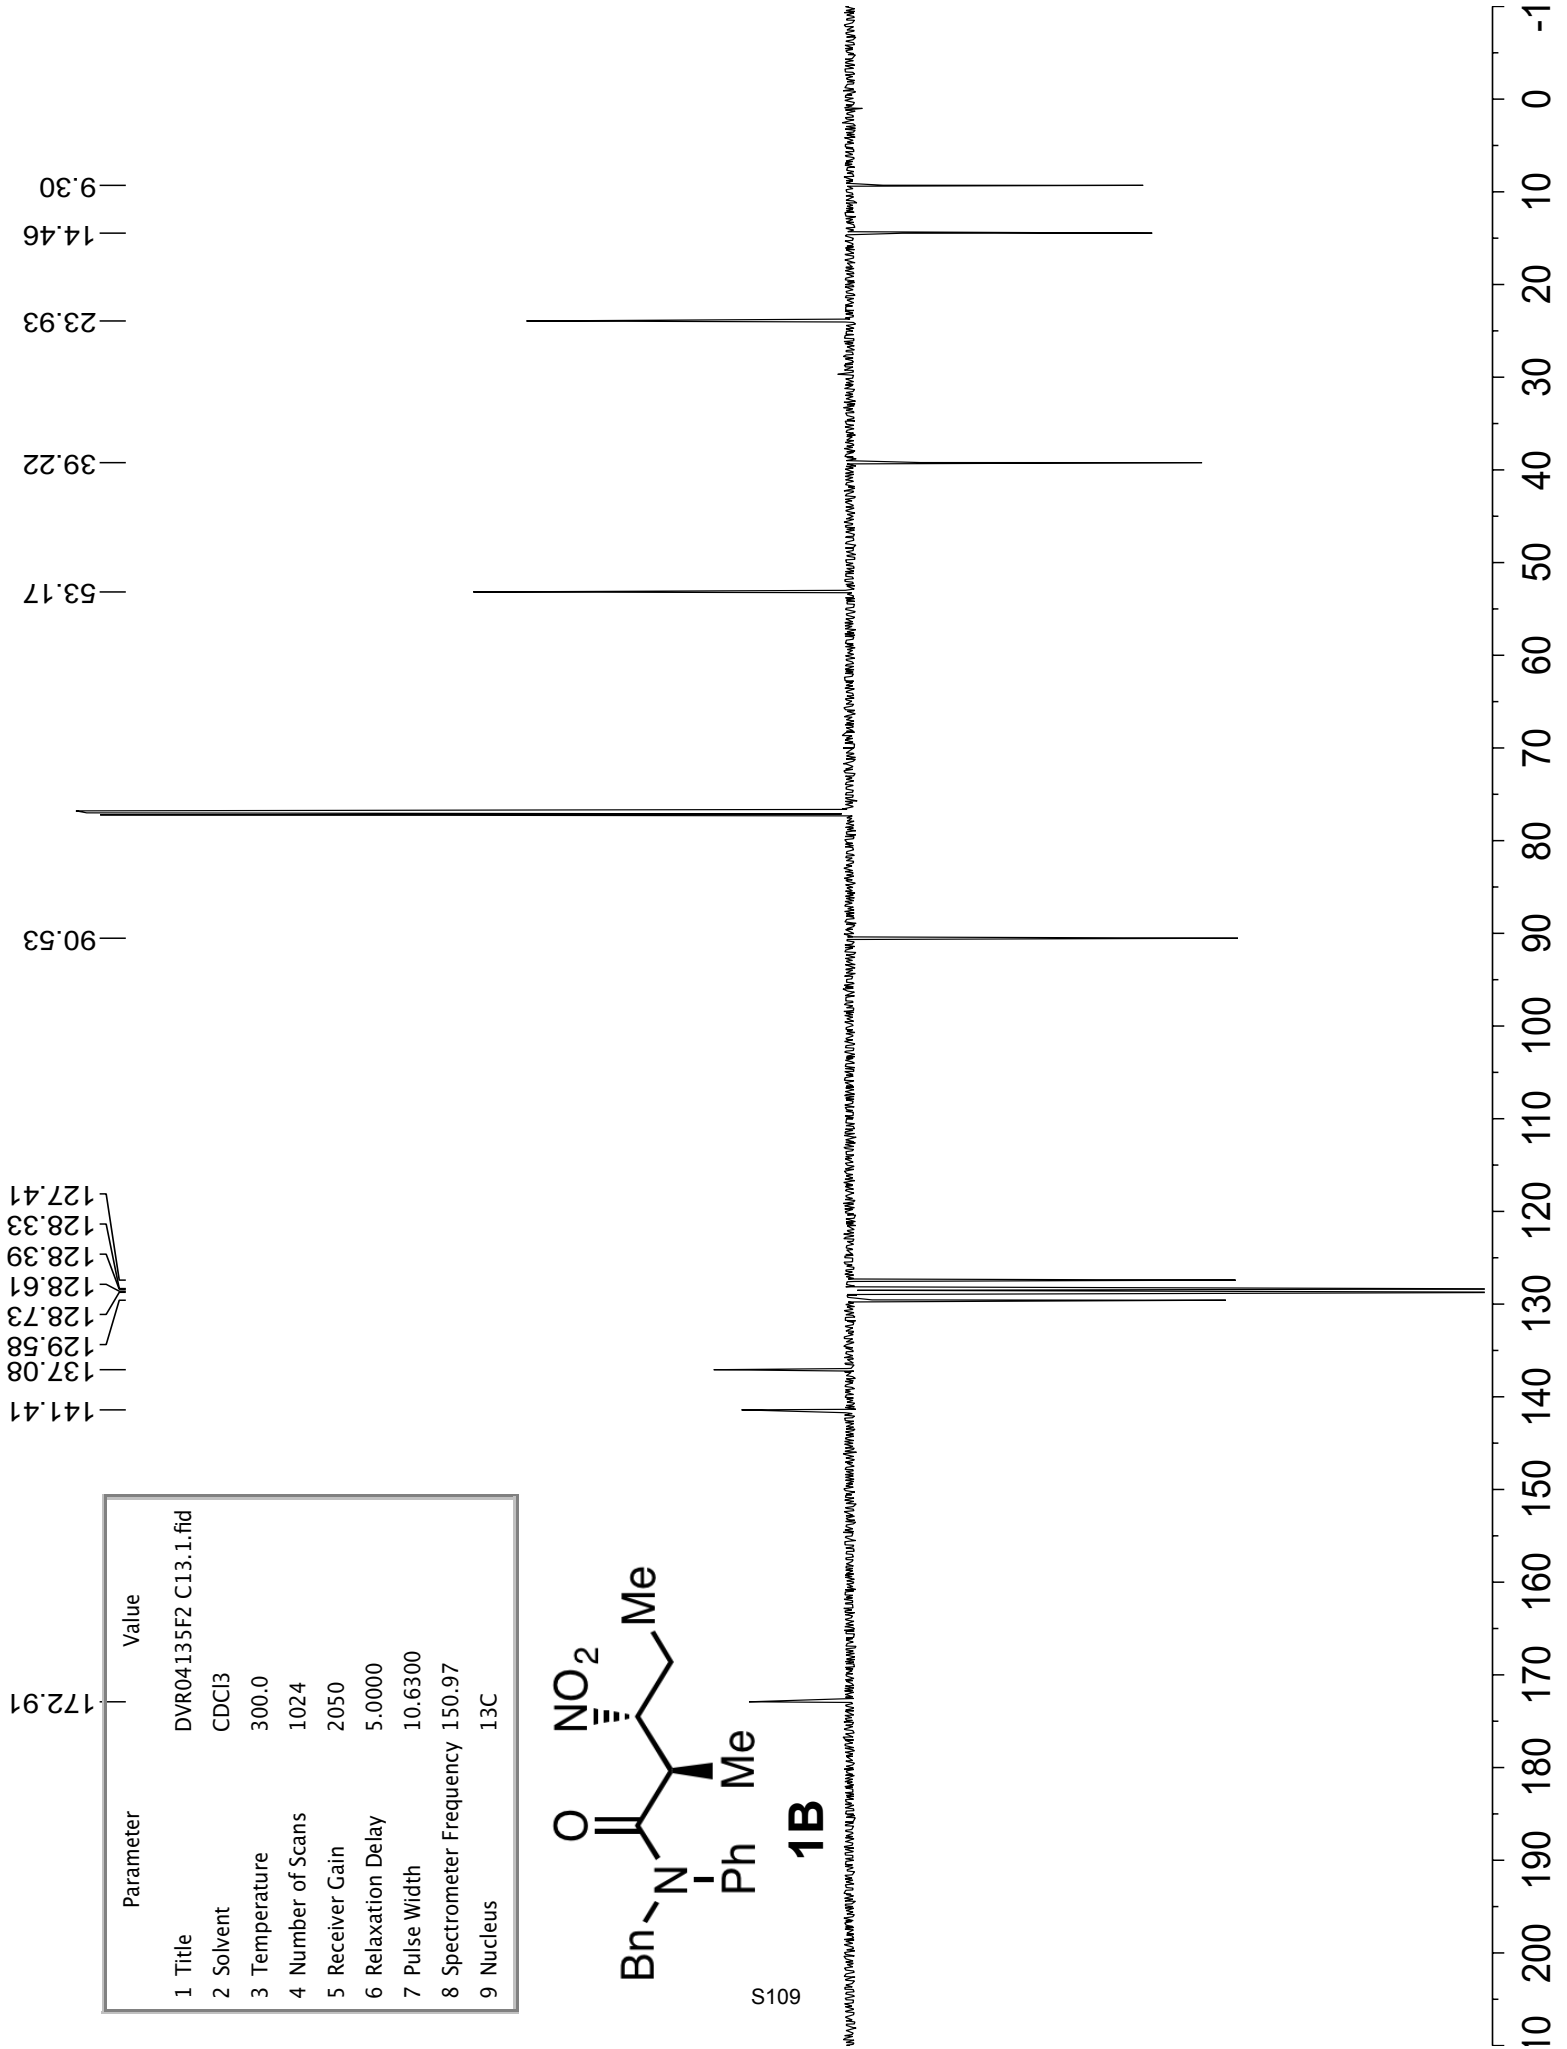

| Parameter                | Value                |
|--------------------------|----------------------|
| 1 Title                  | DVR04135F2 C13.1.fid |
| 2 Solvent                | CDCI3                |
| 3 Temperature            | 300.0                |
| 4 Number of Scans        | 1024                 |
| 5 Receiver Gain          | 2050                 |
| 6 Relaxation Delay       | 5.0000               |
| 7 Pulse Width            | 10.6300              |
| 8 Spectrometer Frequency | 150.97               |
| 9 Nucleus                | <sup>13</sup> C      |

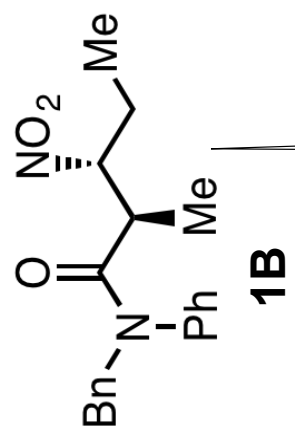

S109

7.27  
7.26  
7.25  
7.25  
7.25  
7.24  
7.23  
7.23  
7.23  
7.20  
7.19  
7.19  
7.18  
7.18  
7.17  
7.16  
7.16  
7.15  
3.86  
3.83  
3.62  
3.58  
2.22  
2.21  
2.21  
2.21  
2.20  
2.19  
2.19  
2.13  
2.12  
2.12  
2.11  
2.10  
2.09  
2.08  
1.85  
1.69  
1.68  
1.67  
1.67  
1.66  
1.65  
1.64  
1.20  
1.19  
1.19  
1.18  
1.17  
1.16  
1.16  
1.15  
1.15  
1.14  
1.14  
1.00  
0.99  
0.98  
0.98  
0.97  
0.97  
0.96  
0.95

| Parameter                | Value           |
|--------------------------|-----------------|
| 1 Title                  | DVR050780.1.fid |
| 2 Solvent                | CDCl3           |
| 3 Temperature            | 298.2           |
| 4 Number of Scans        | 16              |
| 5 Receiver Gain          | 11              |
| 6 Relaxation Delay       | 1.0000          |
| 7 Pulse Width            | 15.0000         |
| 8 Spectrometer Frequency | 400.13          |
| 9 Nucleus                | <sup>1</sup> H  |

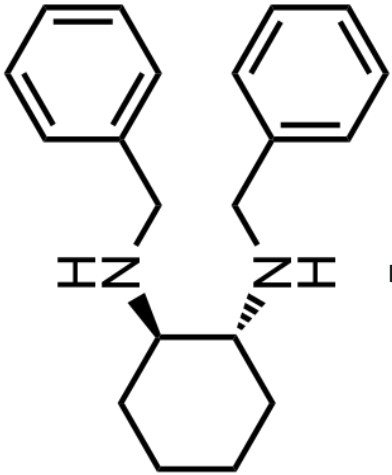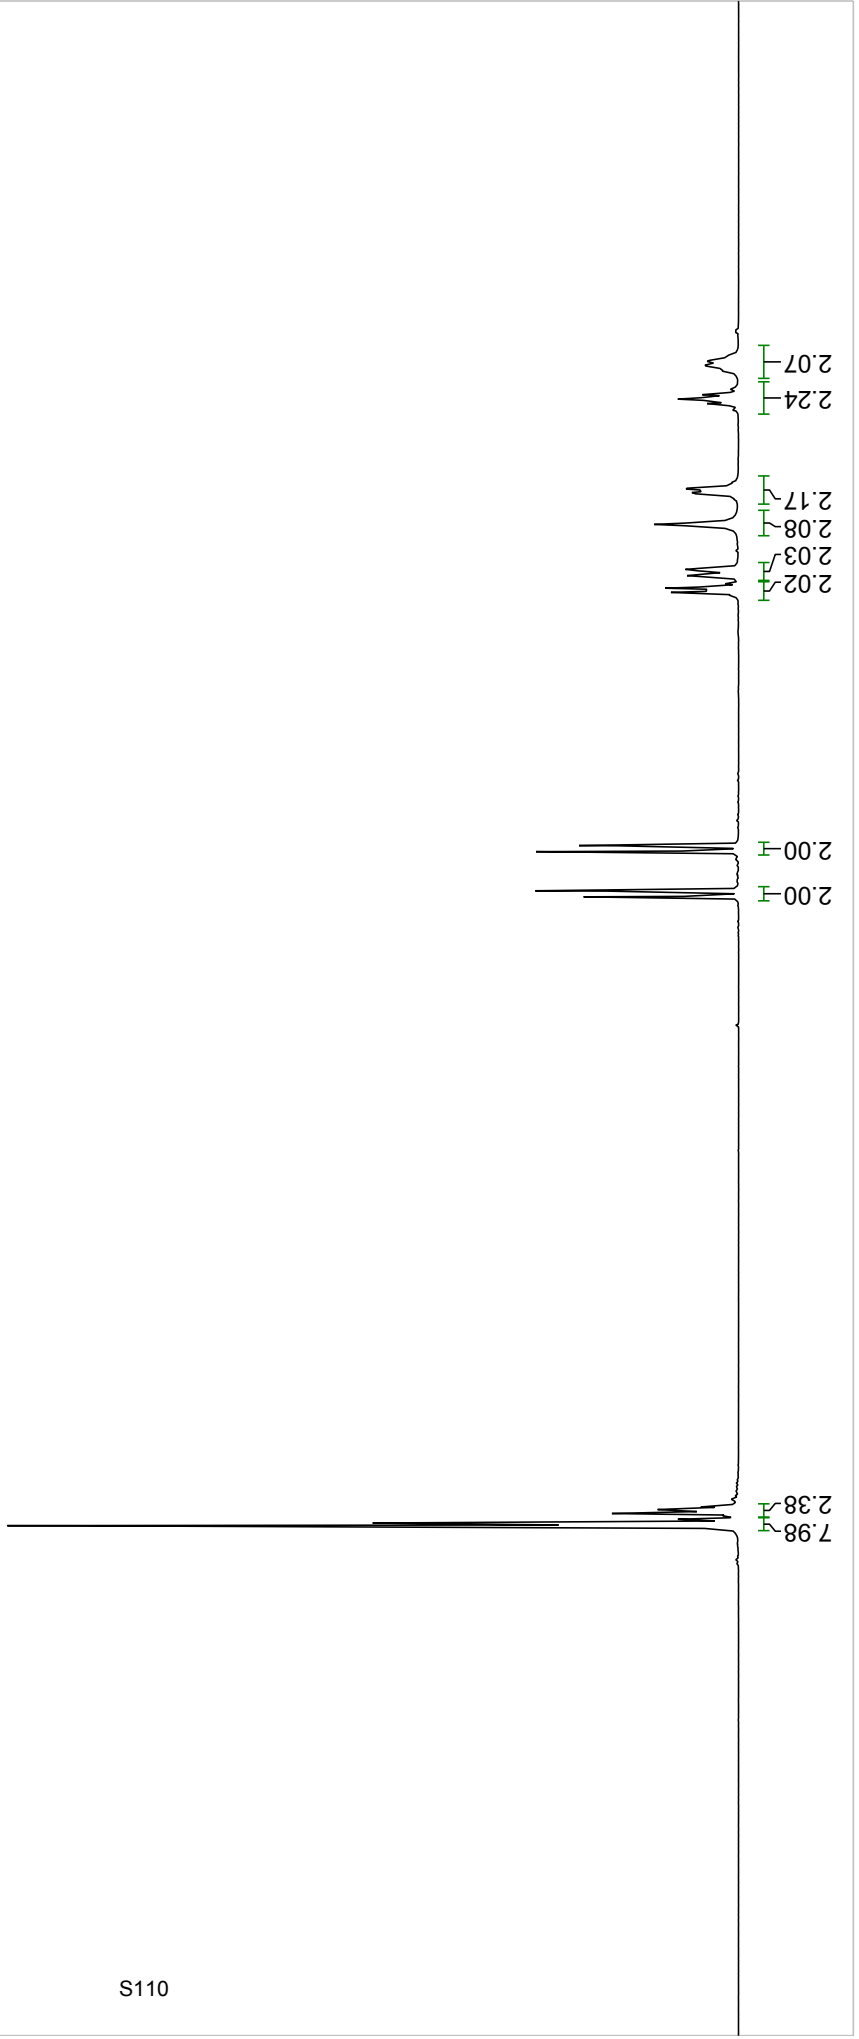

10.0 9.5 9.0 8.5 8.0 7.5 7.0 6.5 6.0 5.5 5.0 4.5 4.0 3.5 3.0 2.5 2.0 1.5 1.0 0.5 0.0 -0.5

140.97  
 128.20  
 127.92  
 126.60  
 60.77  
 50.77  
 31.44  
 24.93

| Parameter                | Value               |
|--------------------------|---------------------|
| 1 Title                  | DVR050780 C13.1.fid |
| 2 Solvent                | CDCl3               |
| 3 Temperature            | 298.2               |
| 4 Number of Scans        | 1024                |
| 5 Receiver Gain          | 512                 |
| 6 Relaxation Delay       | 3.0000              |
| 7 Pulse Width            | 9.2500              |
| 8 Spectrometer Frequency | 100.62              |
| 9 Nucleus                | <sup>13</sup> C     |

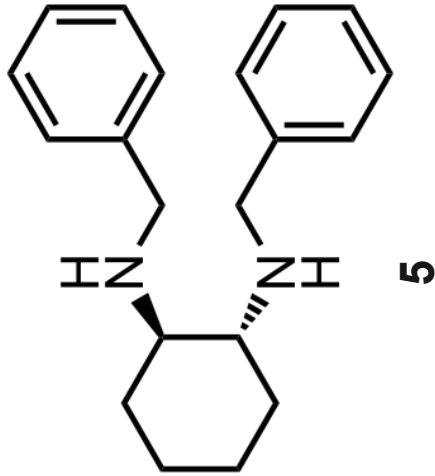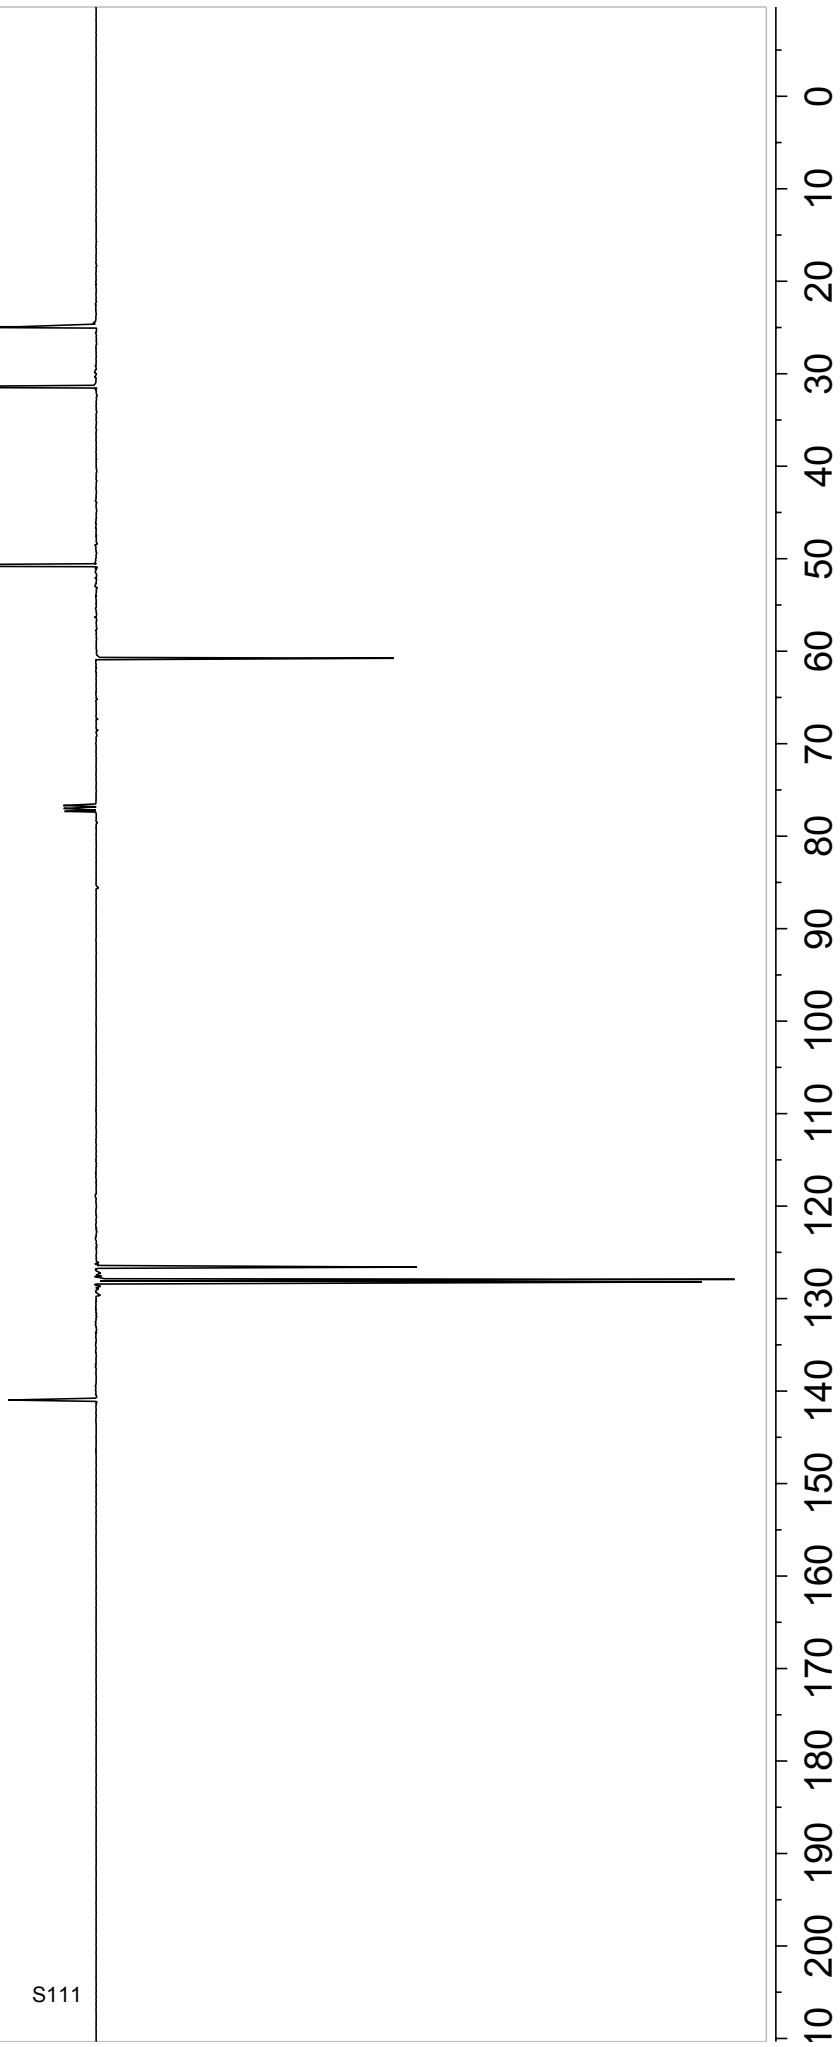



| Parameter                | Value             |
|--------------------------|-------------------|
| 1 Title                  | DVR05108 1H.2.fid |
| 2 Solvent                | CDCl3             |
| 3 Temperature            | 298.2             |
| 4 Number of Scans        | 1024              |
| 5 Receiver Gain          | 512               |
| 6 Relaxation Delay       | 3.0000            |
| 7 Pulse Width            | 9.2500            |
| 8 Spectrometer Frequency | 100.62            |
| 9 Nucleus                | 13C               |

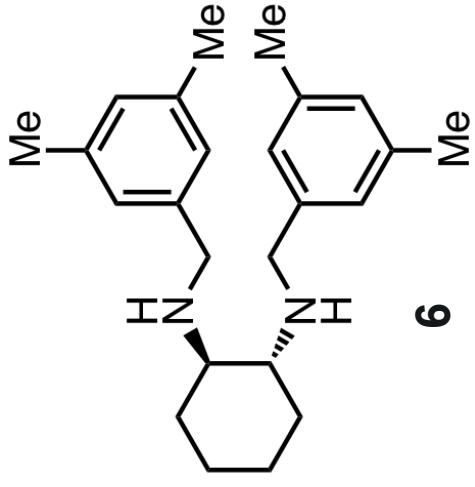

141.02  
137.73  
128.28  
125.84  
61.09  
50.91  
31.61  
25.06  
21.24

S113

200 190 180 170 160 150 140 130 120 110 100 90 80 70 60 50 40 30 20 10 0 -1

7.78 7.78 7.75 7.74 7.74 4.03 4.00 3.82 3.80 2.29 2.29 2.28 2.28 2.27 2.27 2.26 2.26 2.18 2.17 2.17 2.16 2.15 2.15 2.14 2.14 1.86 1.78 1.77 1.77 1.76 1.75 1.75 1.74 1.74 1.28 1.27 1.27 1.26 1.26 1.25 1.25 1.24 1.24 1.23 1.08 1.08 1.07 1.07 1.06 1.06 1.05 1.05 1.04 1.03 1.03 1.02

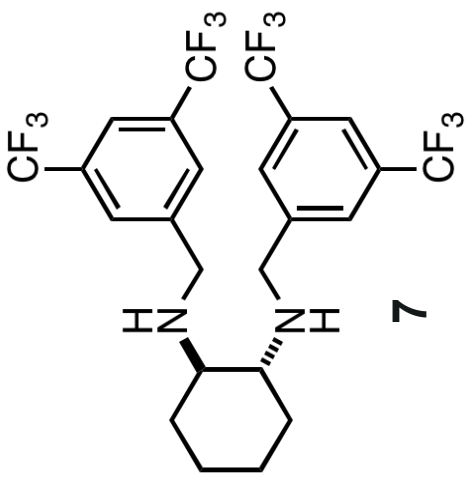

| Parameter                | Value          |
|--------------------------|----------------|
| 1 Title                  | DVR04226.1.fid |
| 2 Solvent                | CDCl3          |
| 3 Temperature            | 297.2          |
| 4 Number of Scans        | 16             |
| 5 Receiver Gain          | 57             |
| 6 Relaxation Delay       | 1.0000         |
| 7 Pulse Width            | 10.7700        |
| 8 Spectrometer Frequency | 600.32         |
| 9 Nucleus                | 1H             |

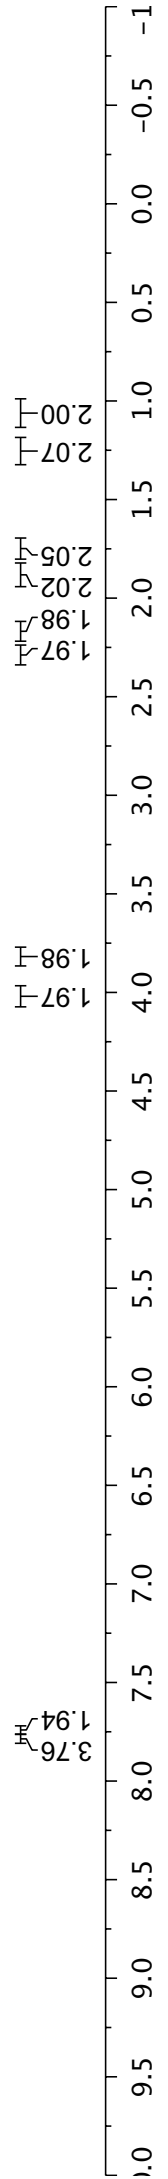



| Parameter                | Value          |
|--------------------------|----------------|
| 1 Title                  | DVR04226.2.fid |
| 2 Solvent                | CDCl3          |
| 3 Temperature            | 297.3          |
| 4 Number of Scans        | 16             |
| 5 Receiver Gain          | 90             |
| 6 Relaxation Delay       | 3.0000         |
| 7 Pulse Width            | 11.6200        |
| 8 Spectrometer Frequency | 564.81         |
| 9 Nucleus                | 19F            |

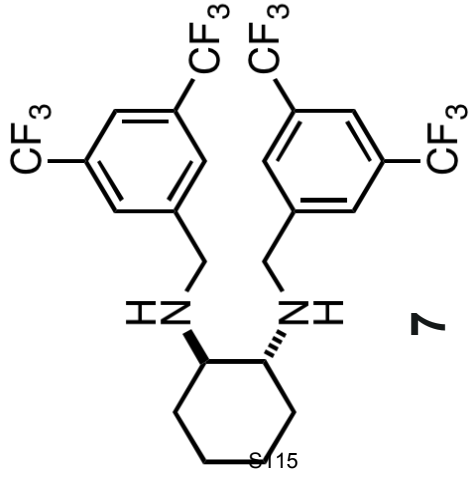

-63.01

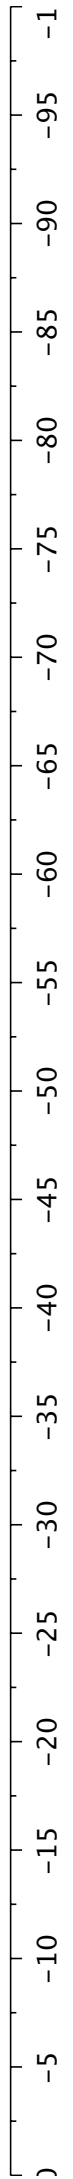

| Parameter                | Value           |
|--------------------------|-----------------|
| 1 Title                  | DVR04226.3.fid  |
| 2 Solvent                | CDCl3           |
| 3 Temperature            | 299.0           |
| 4 Number of Scans        | 1024            |
| 5 Receiver Gain          | 2050            |
| 6 Relaxation Delay       | 5.0000          |
| 7 Pulse Width            | 10.6300         |
| 8 Spectrometer Frequency | 150.97          |
| 9 Nucleus                | <sup>13</sup> C |

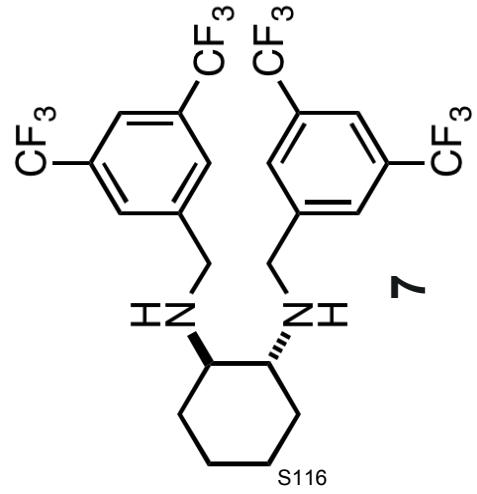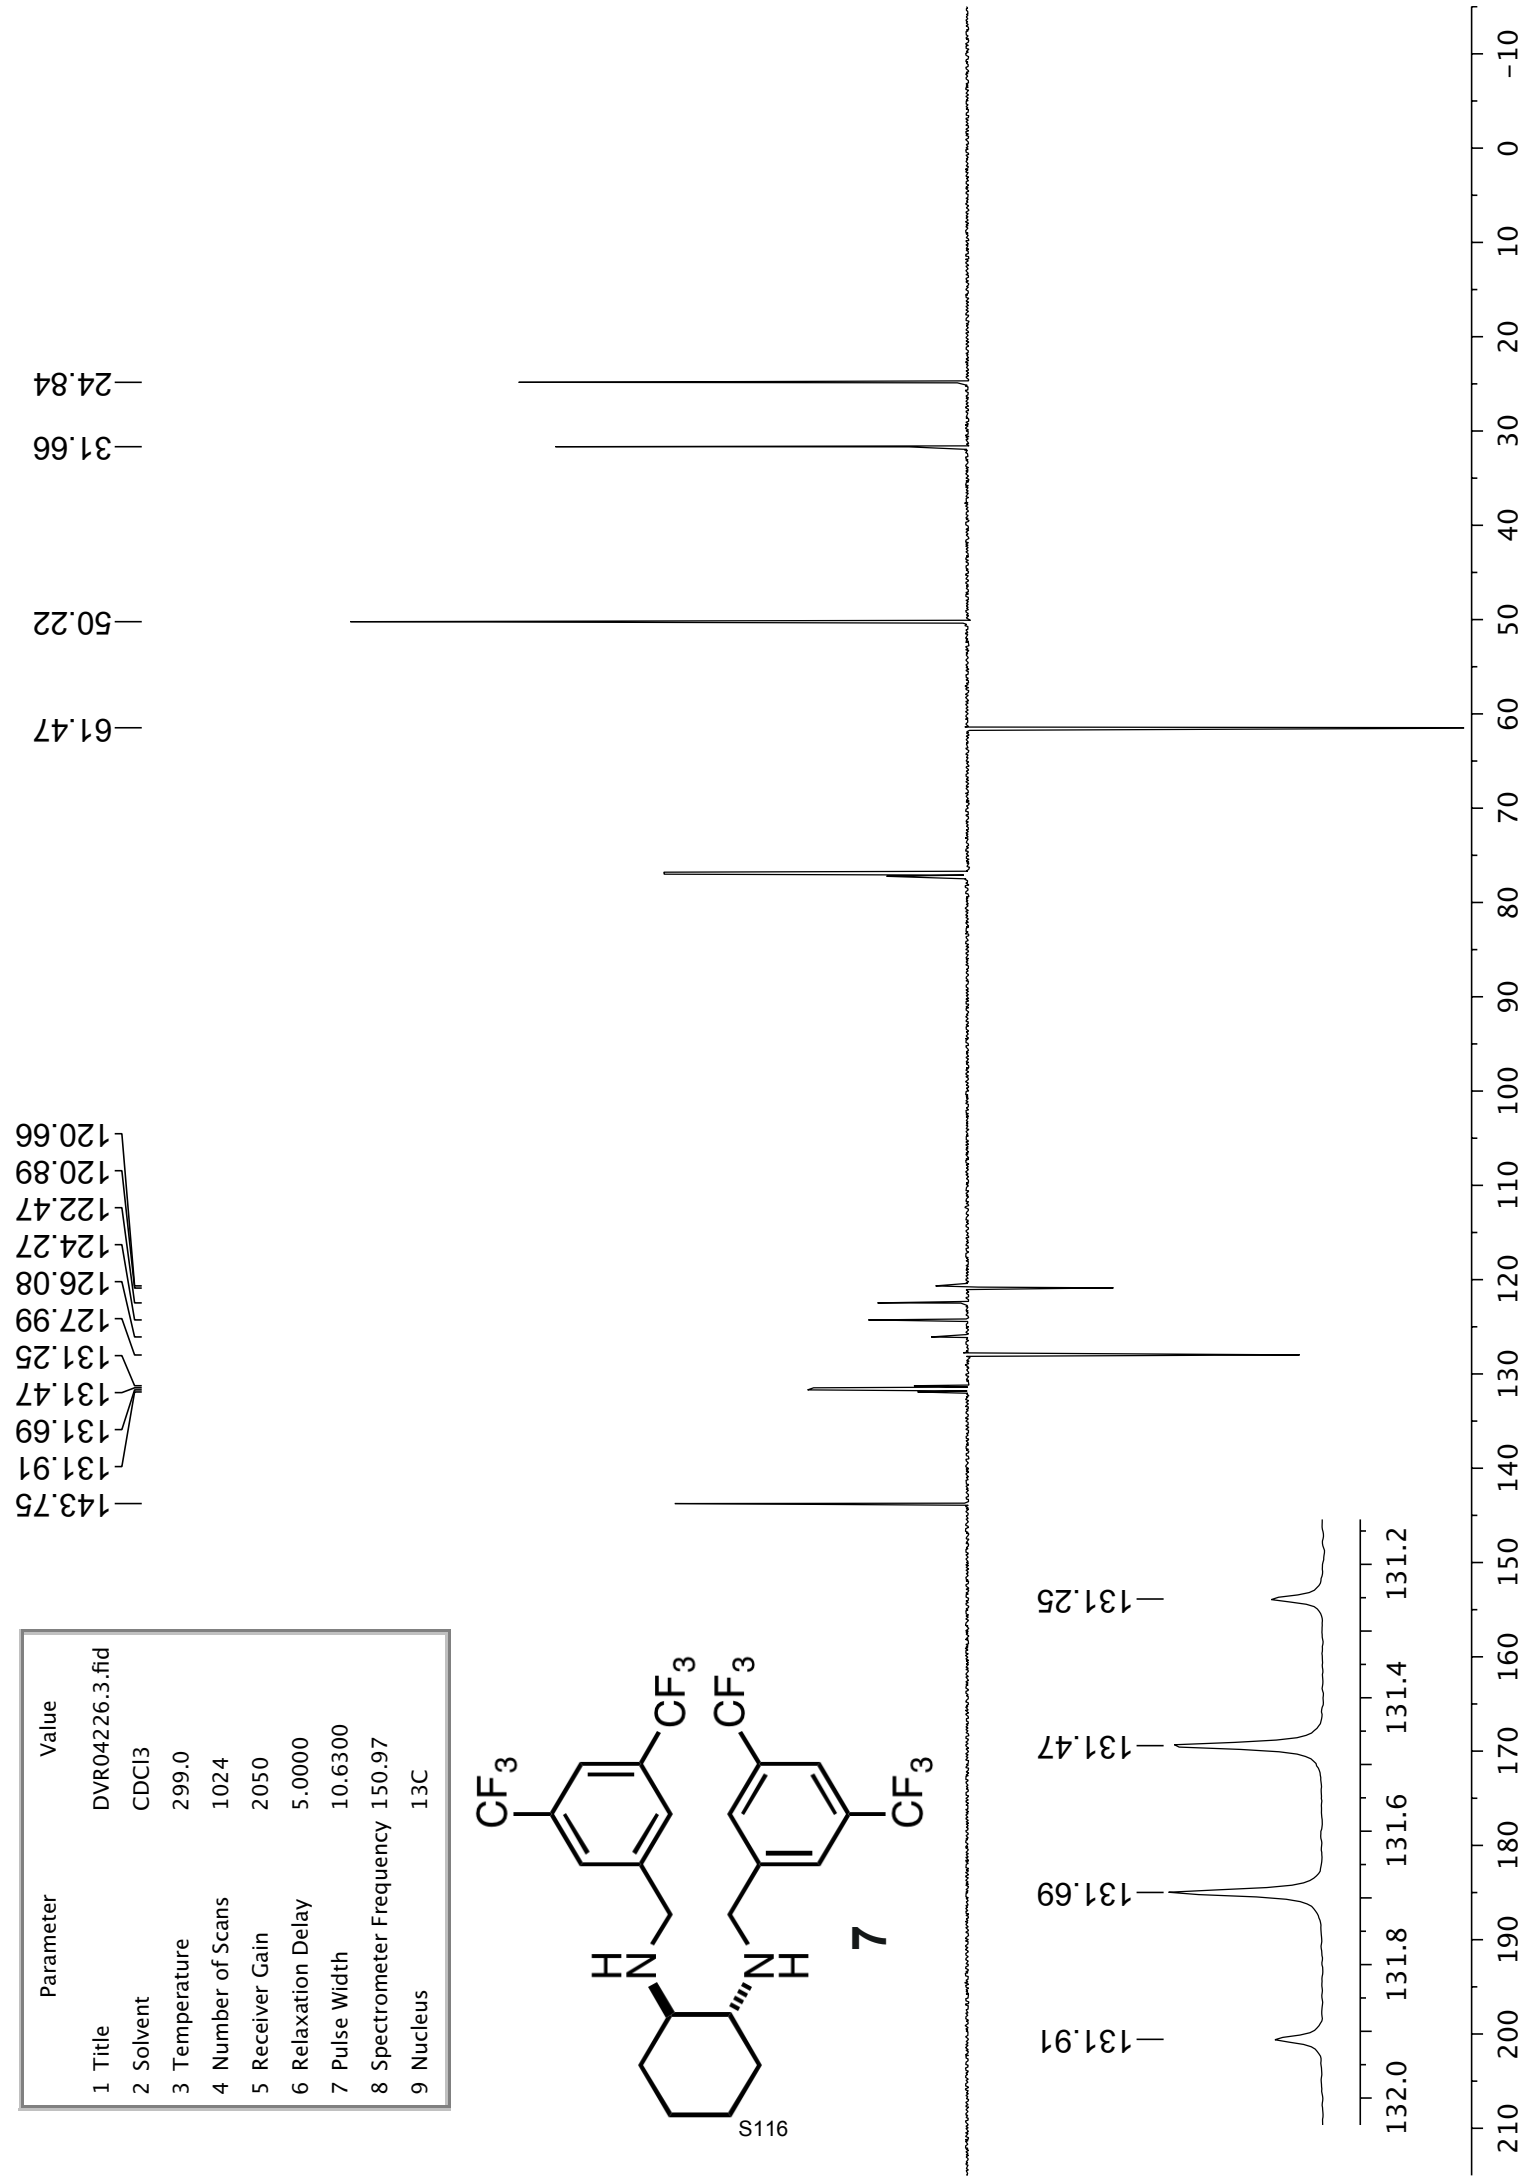

Parameter Value

|                          |                   |
|--------------------------|-------------------|
| 1 Title                  | DVR04192CRD.1.fid |
| 2 Solvent                | CDCl3             |
| 3 Temperature            | 298.1             |
| 4 Number of Scans        | 16                |
| 5 Receiver Gain          | 9                 |
| 6 Relaxation Delay       | 1.0000            |
| 7 Pulse Width            | 15.0000           |
| 8 Spectrometer Frequency | 400.13            |
| 9 Nucleus                | 1H                |

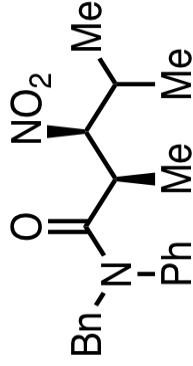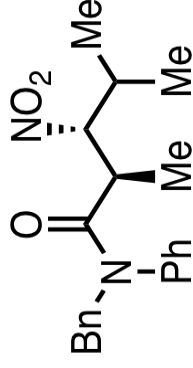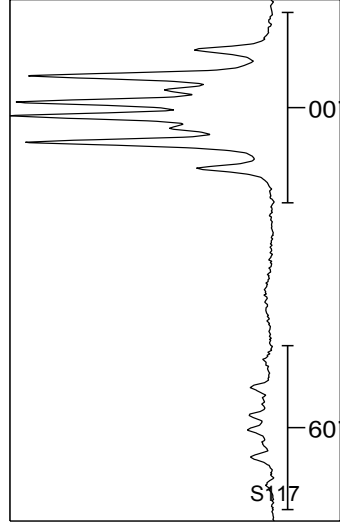

3.20 3.10 3.00 2.90

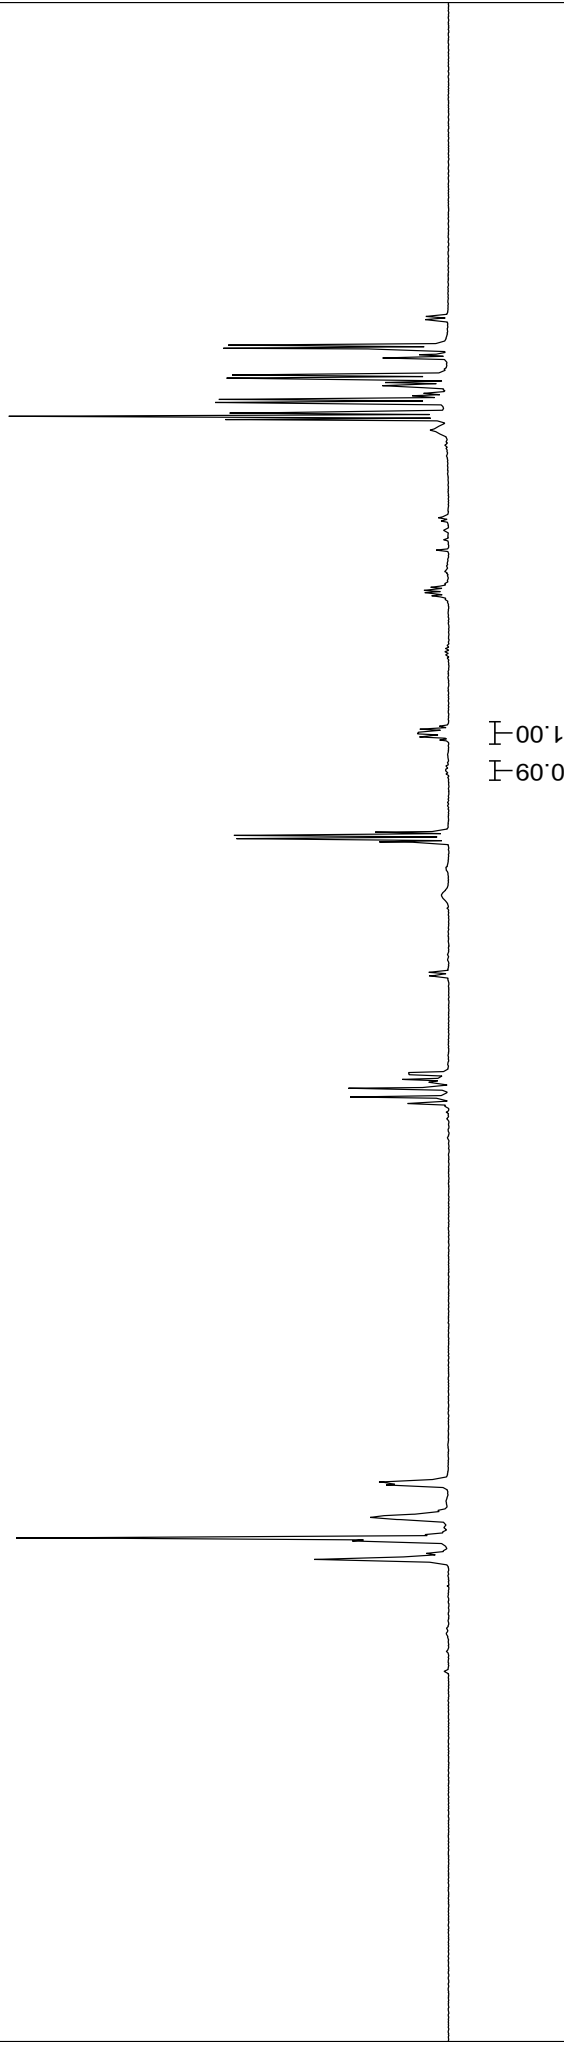

10.0 9.5 9.0 8.5 8.0 7.5 7.0 6.5 6.0 5.5 5.0 4.5 4.0 3.5 3.0 2.5 2.0 1.5 1.0 0.5 0.0 -0.5 -1

7.39  
7.38  
7.38  
7.37  
7.37  
7.36  
7.36  
7.16  
7.15  
7.14  
7.14  
7.13  
6.98  
6.97  
6.97  
6.96  
6.96  
6.95  
4.91  
4.89  
4.83  
4.81  
4.78  
4.77  
4.76  
4.75

| Parameter                | Value            |
|--------------------------|------------------|
| 1 Title                  | DVR04192D1.1.fid |
| 2 Solvent                | CDCl3            |
| 3 Temperature            | 298.0            |
| 4 Number of Scans        | 16               |
| 5 Receiver Gain          | 181              |
| 6 Relaxation Delay       | 1.0000           |
| 7 Pulse Width            | 10.7700          |
| 8 Spectrometer Frequency | 600.32           |
| 9 Nucleus                | <sup>1</sup> H   |

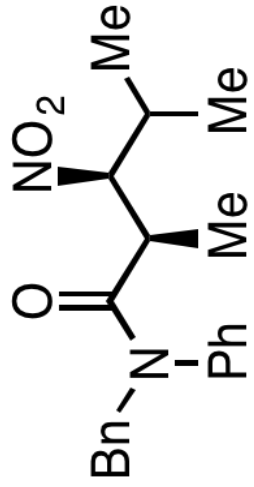

9A

2.97  
3.36  
1.97  
1.97  
1.01  
1.02  
1.03  
1.00  
1.01  
3.03  
3.07  
3.08

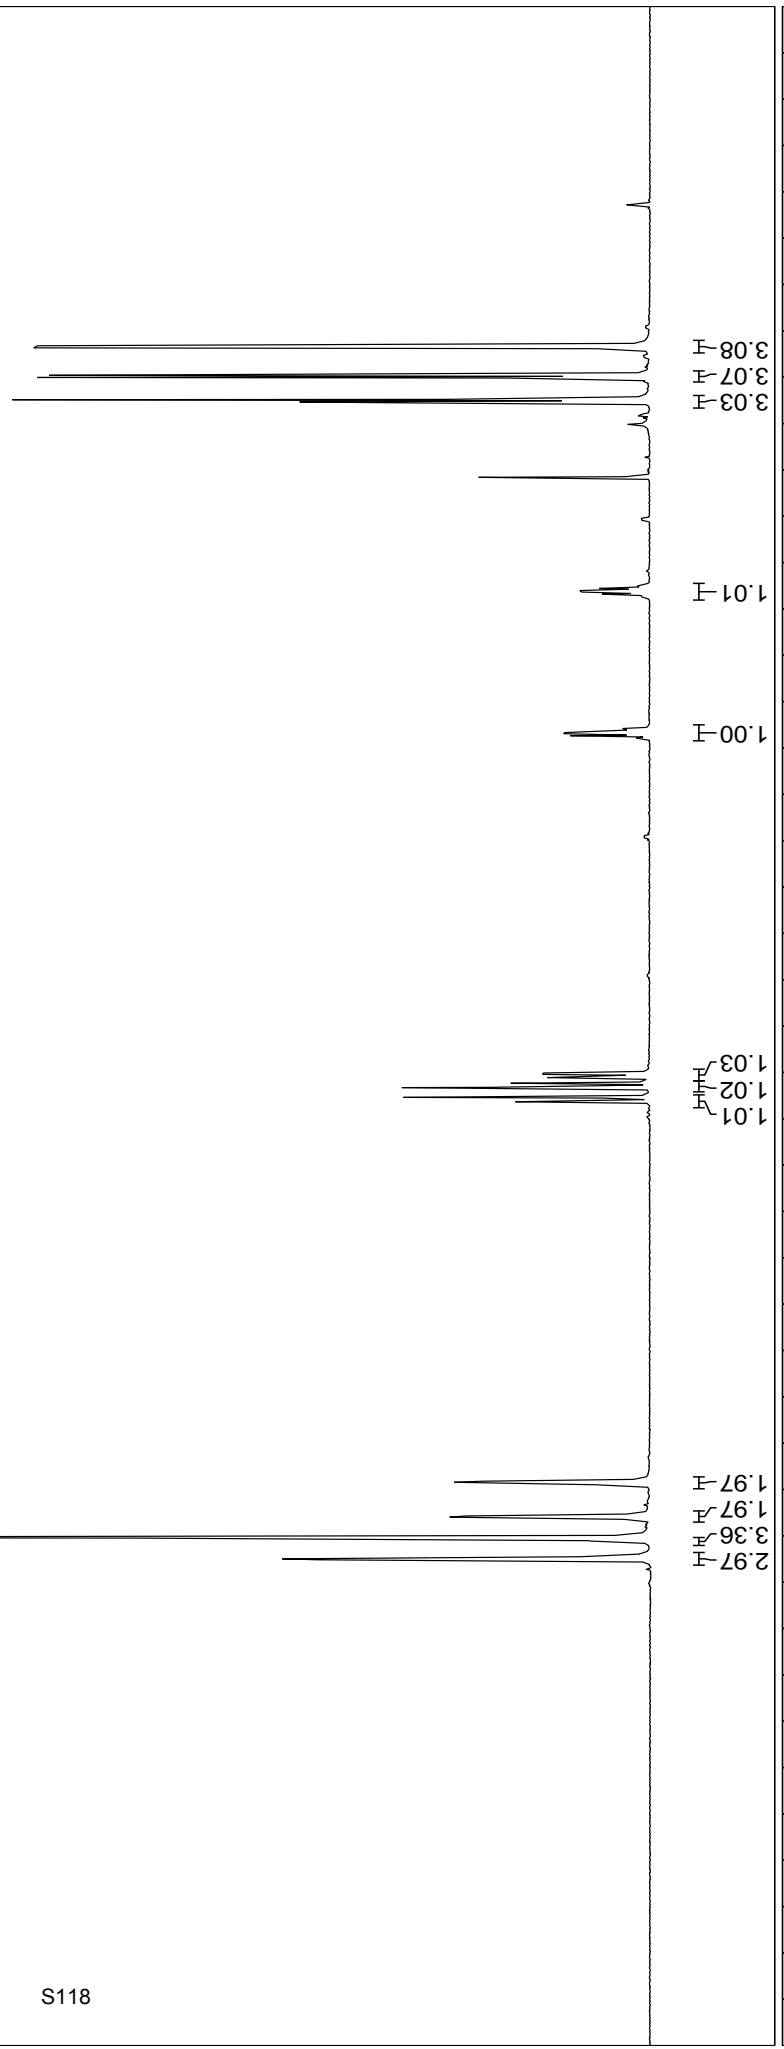

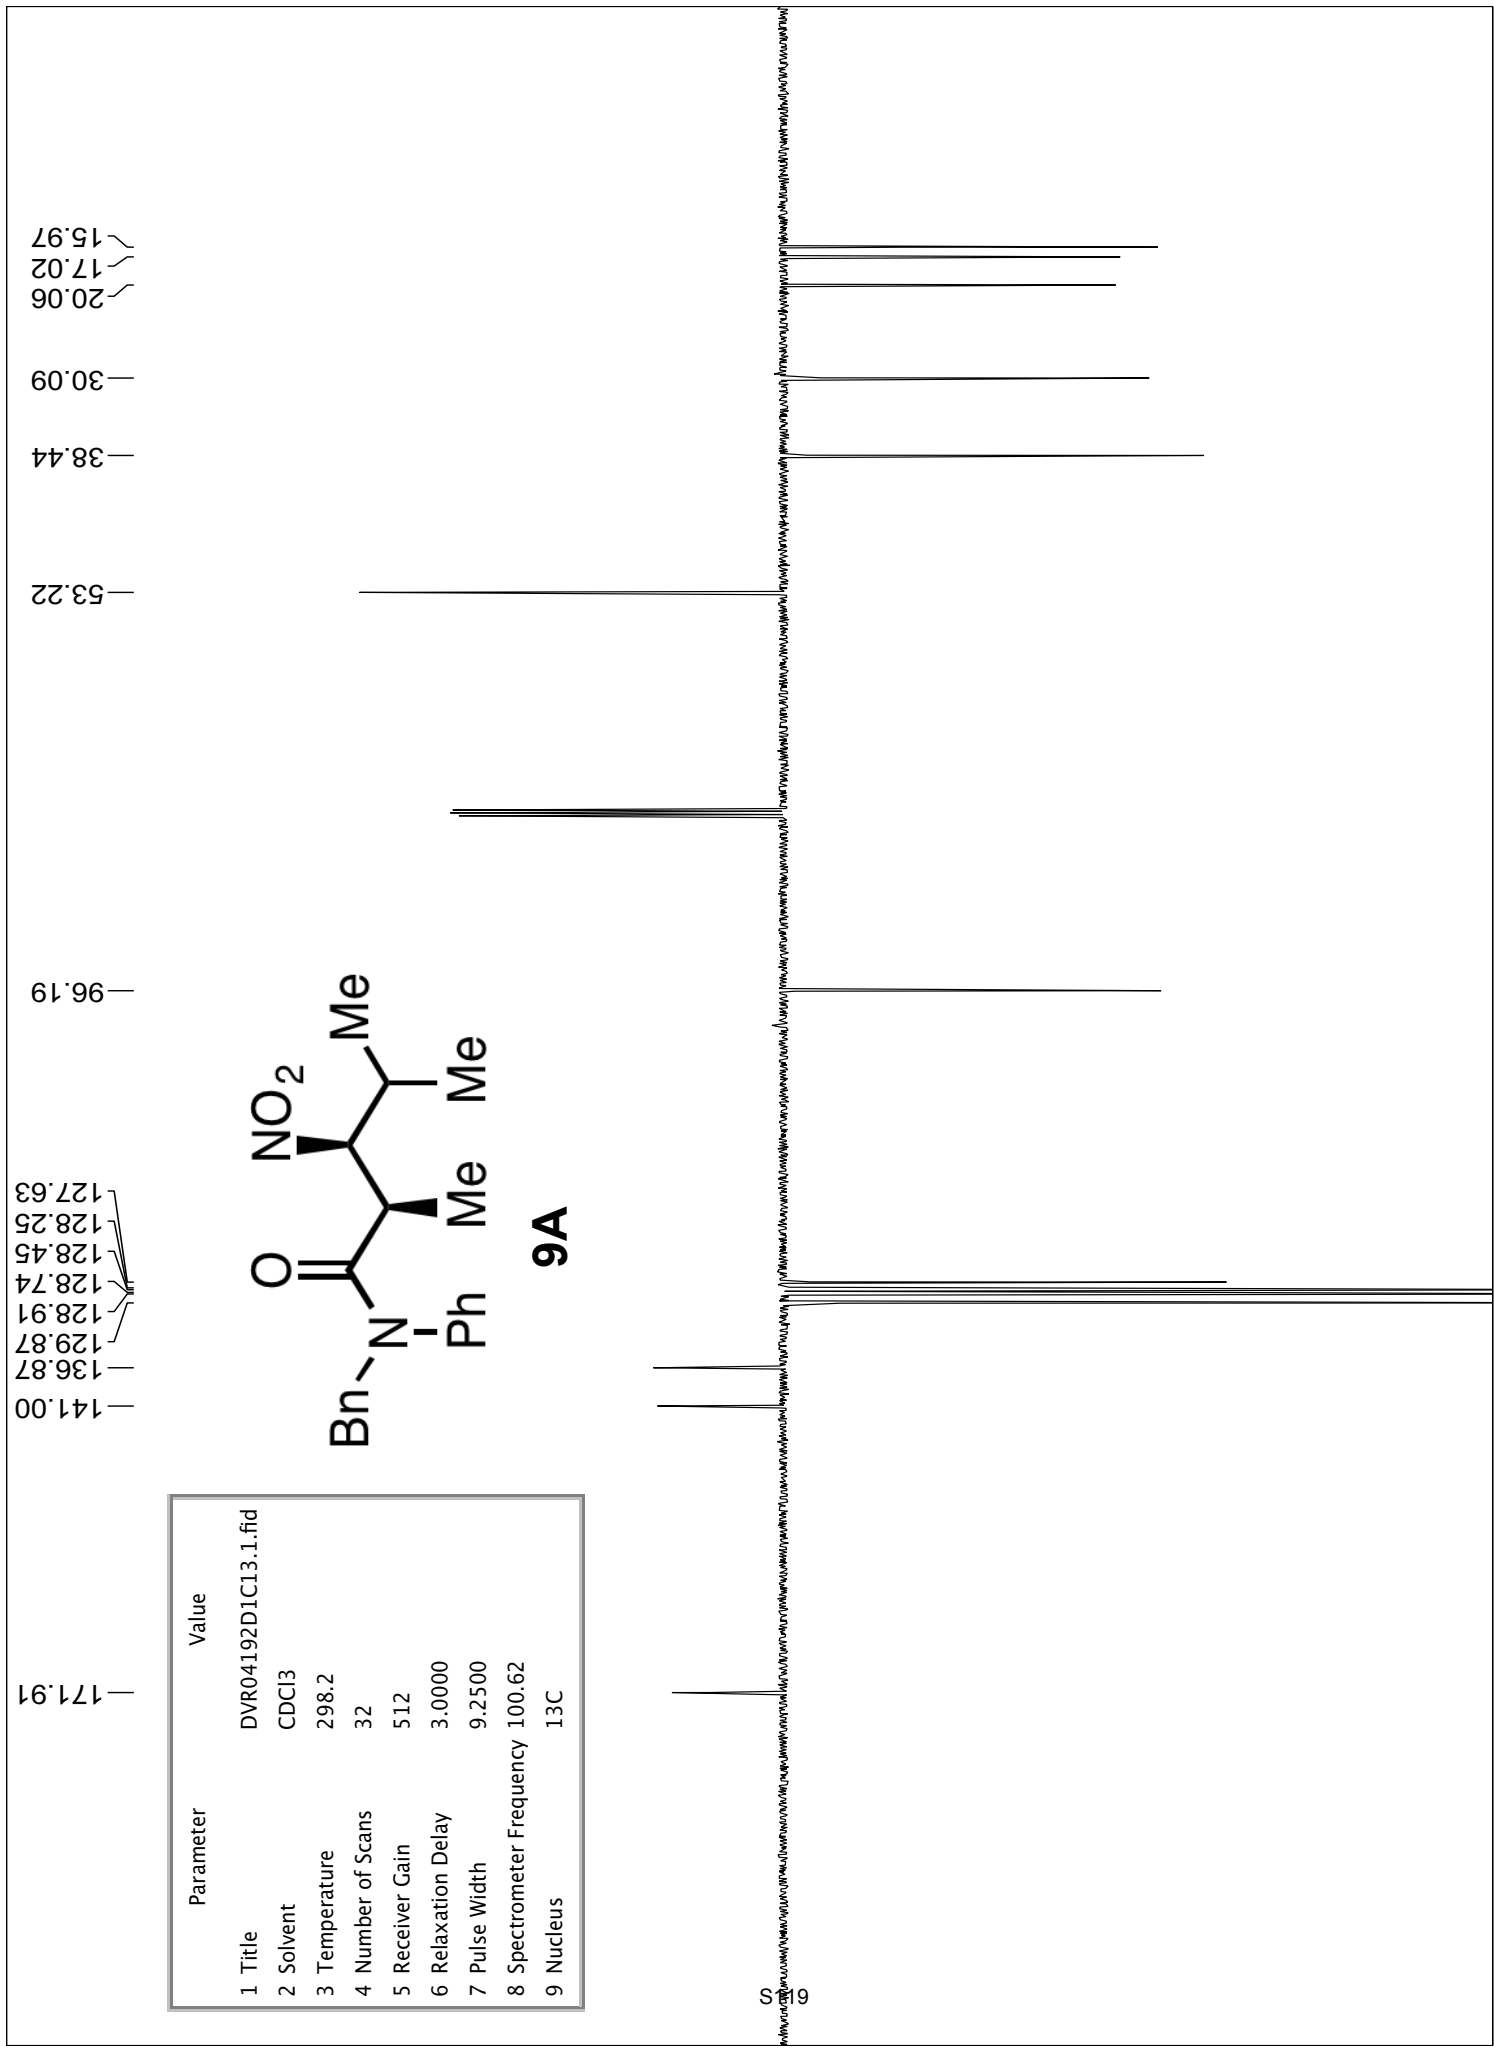

| Parameter                | Value            |
|--------------------------|------------------|
| 1 Title                  | DVR04192D2.1.fid |
| 2 Solvent                | CDCl3            |
| 3 Temperature            | 298.2            |
| 4 Number of Scans        | 16               |
| 5 Receiver Gain          | 6                |
| 6 Relaxation Delay       | 1.0000           |
| 7 Pulse Width            | 15.0000          |
| 8 Spectrometer Frequency | 400.13           |
| 9 Nucleus                | <sup>1</sup> H   |

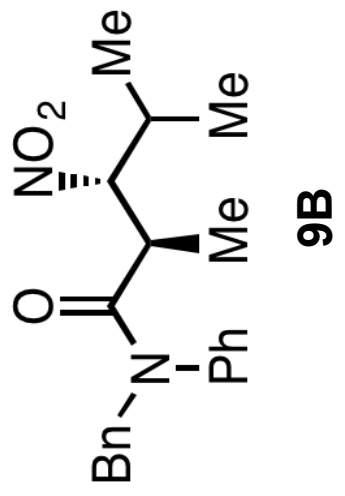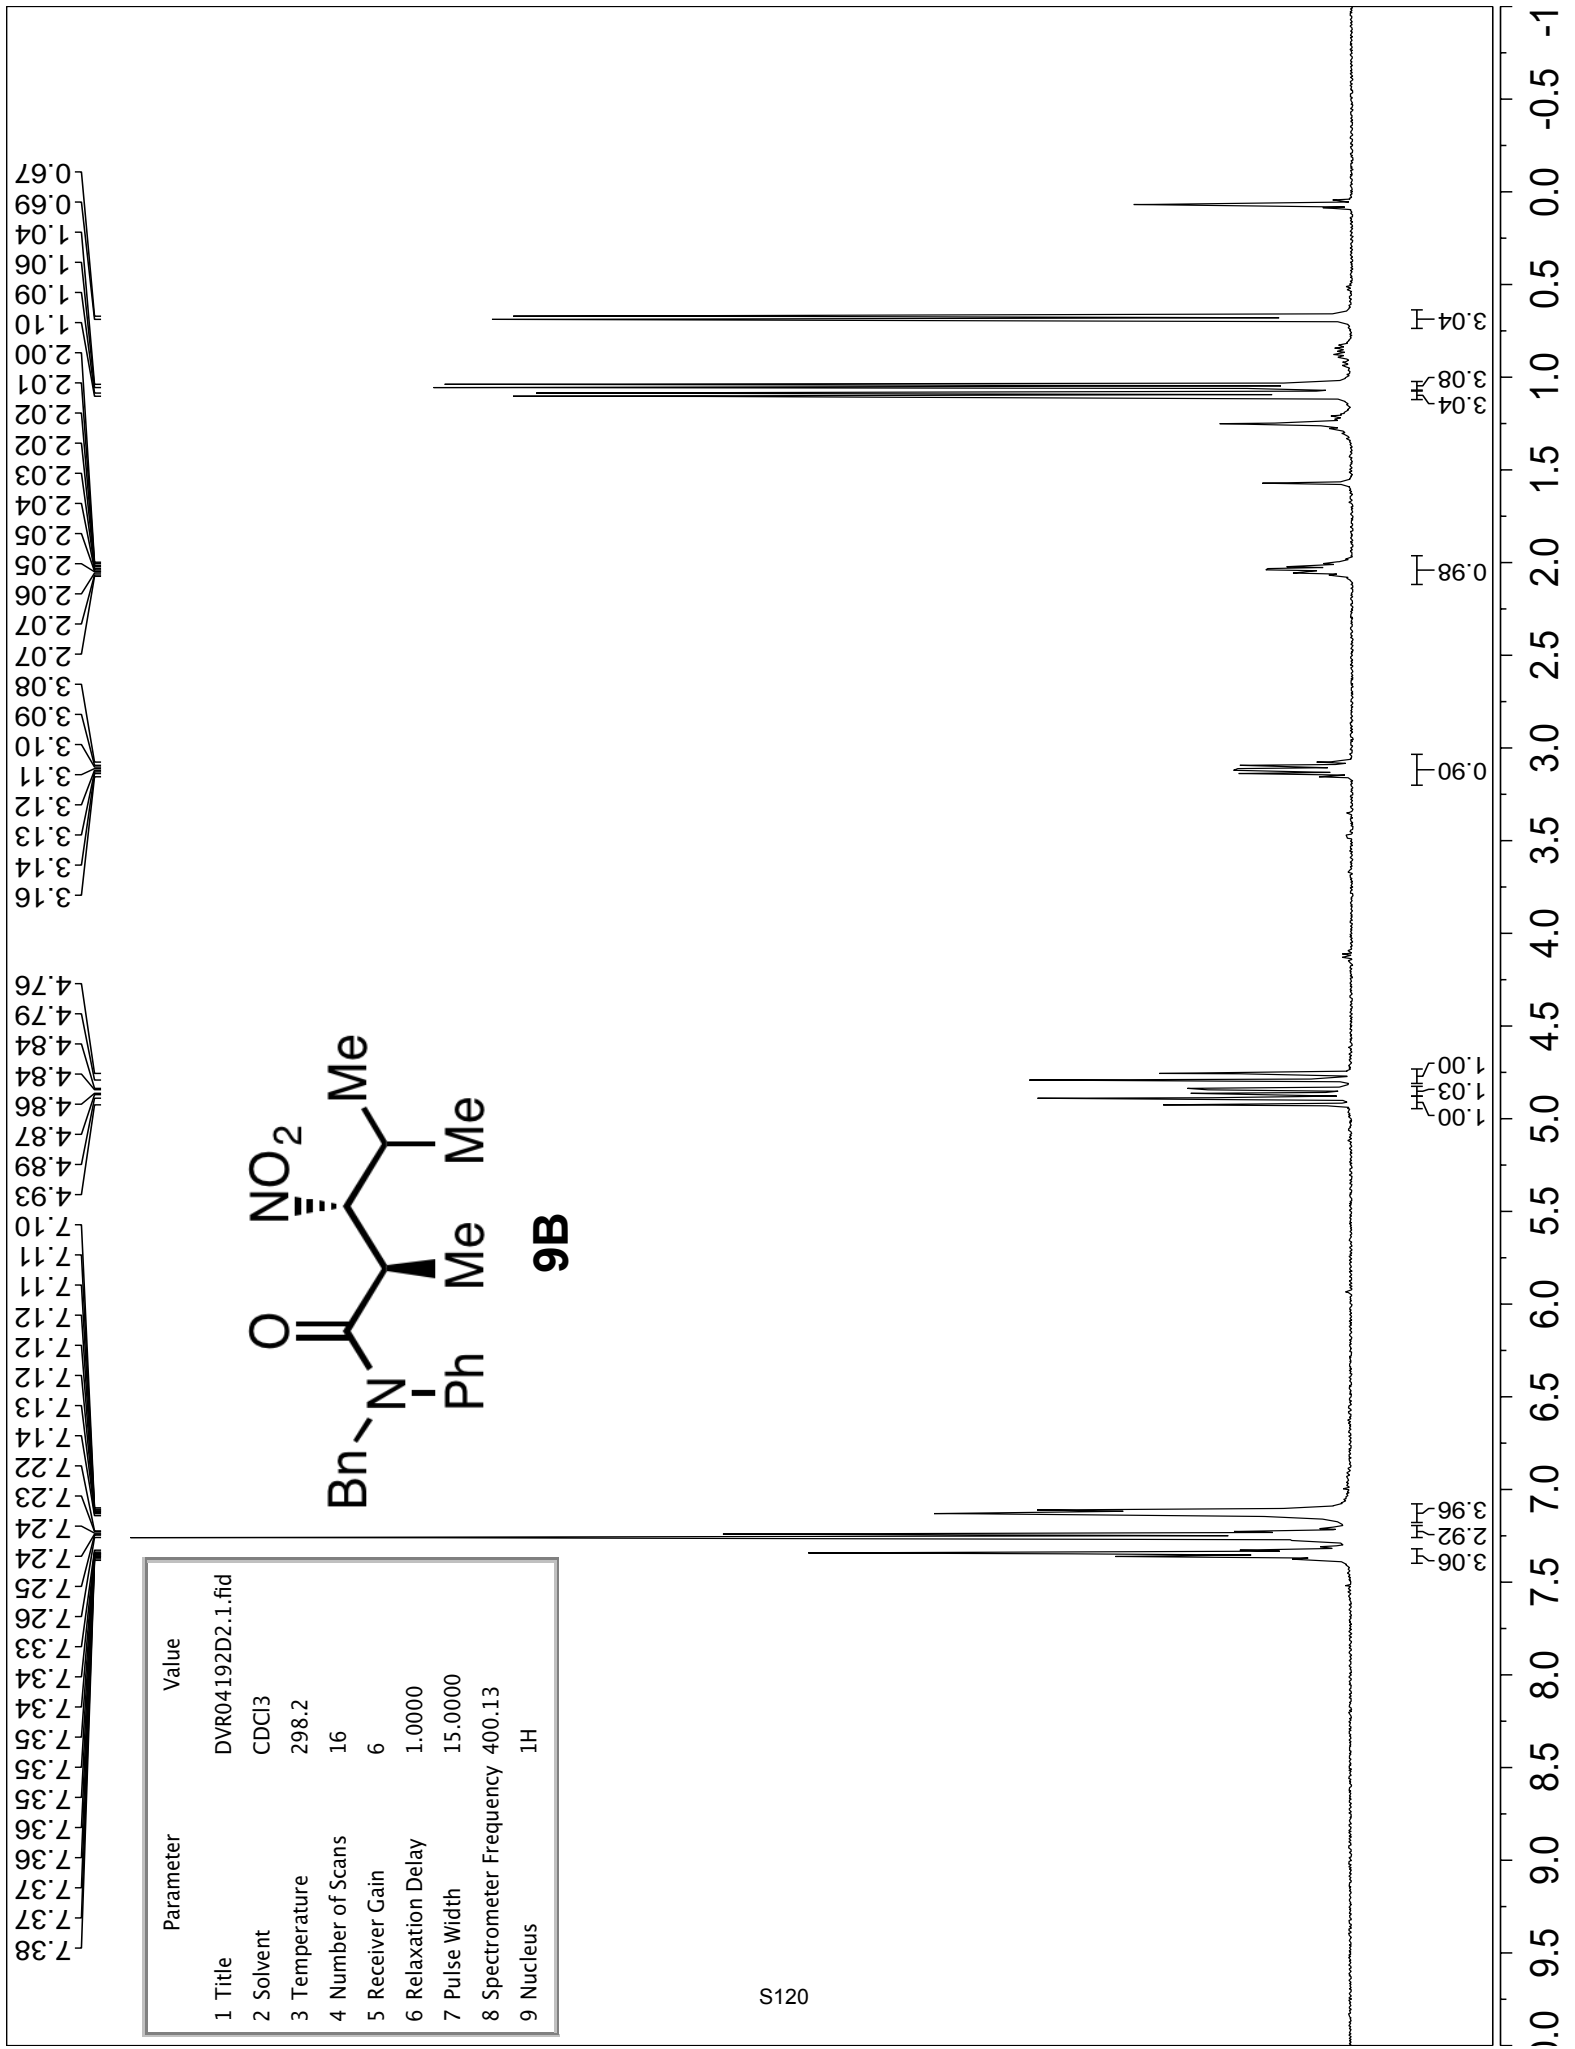

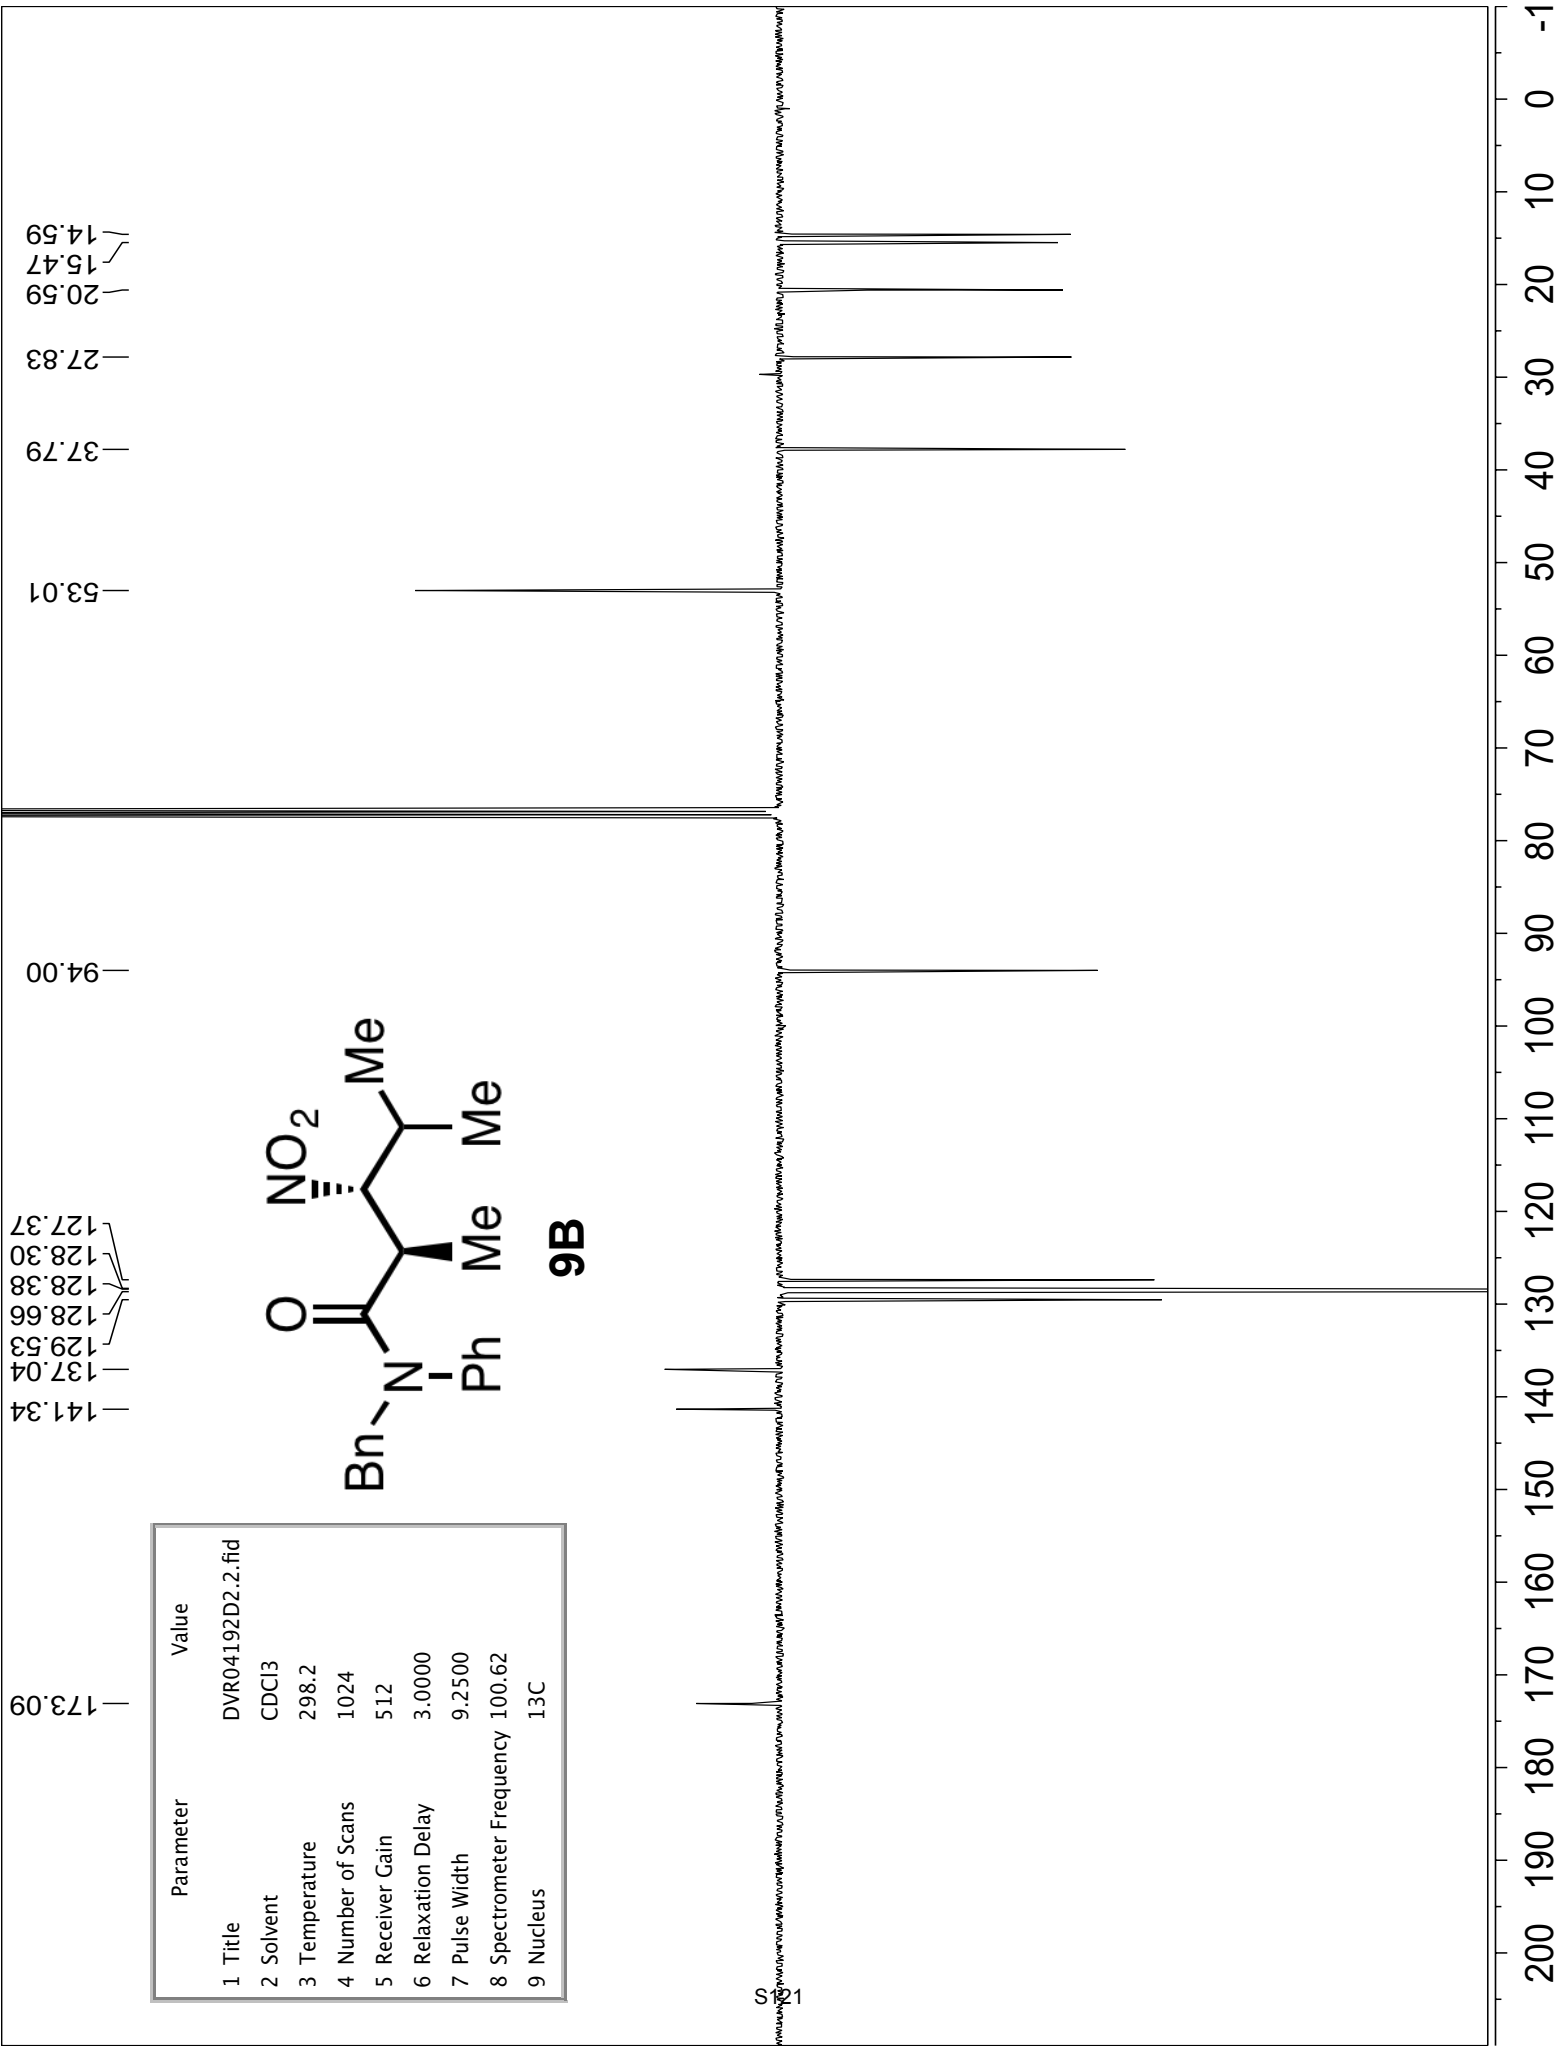

| Parameter                | Value             |
|--------------------------|-------------------|
| 1 Title                  | DVR04130CRD.1.fid |
| 2 Solvent                | CDCl3             |
| 3 Temperature            | 297.8             |
| 4 Number of Scans        | 16                |
| 5 Receiver Gain          | 144               |
| 6 Relaxation Delay       | 1.0000            |
| 7 Pulse Width            | 10.7700           |
| 8 Spectrometer Frequency | 600.32            |
| 9 Nucleus                | <sup>1</sup> H    |

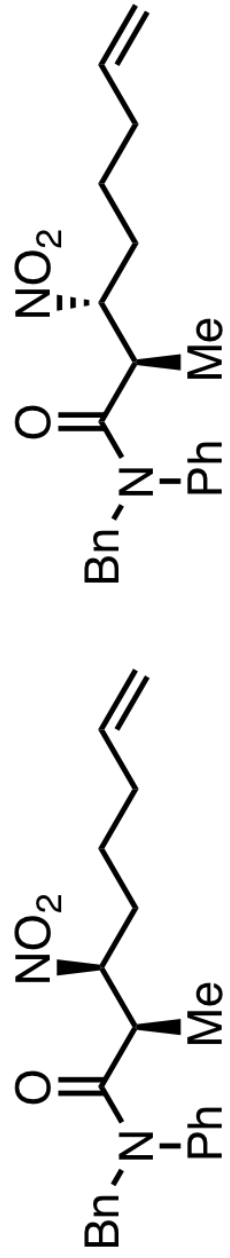

**Crude**

**10A**  
**79:21**

**10B**

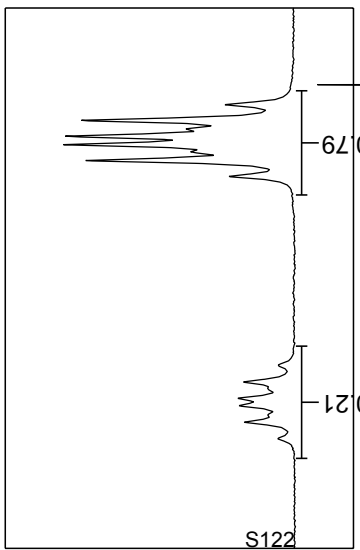

3.05 2.95 2.85 2.75

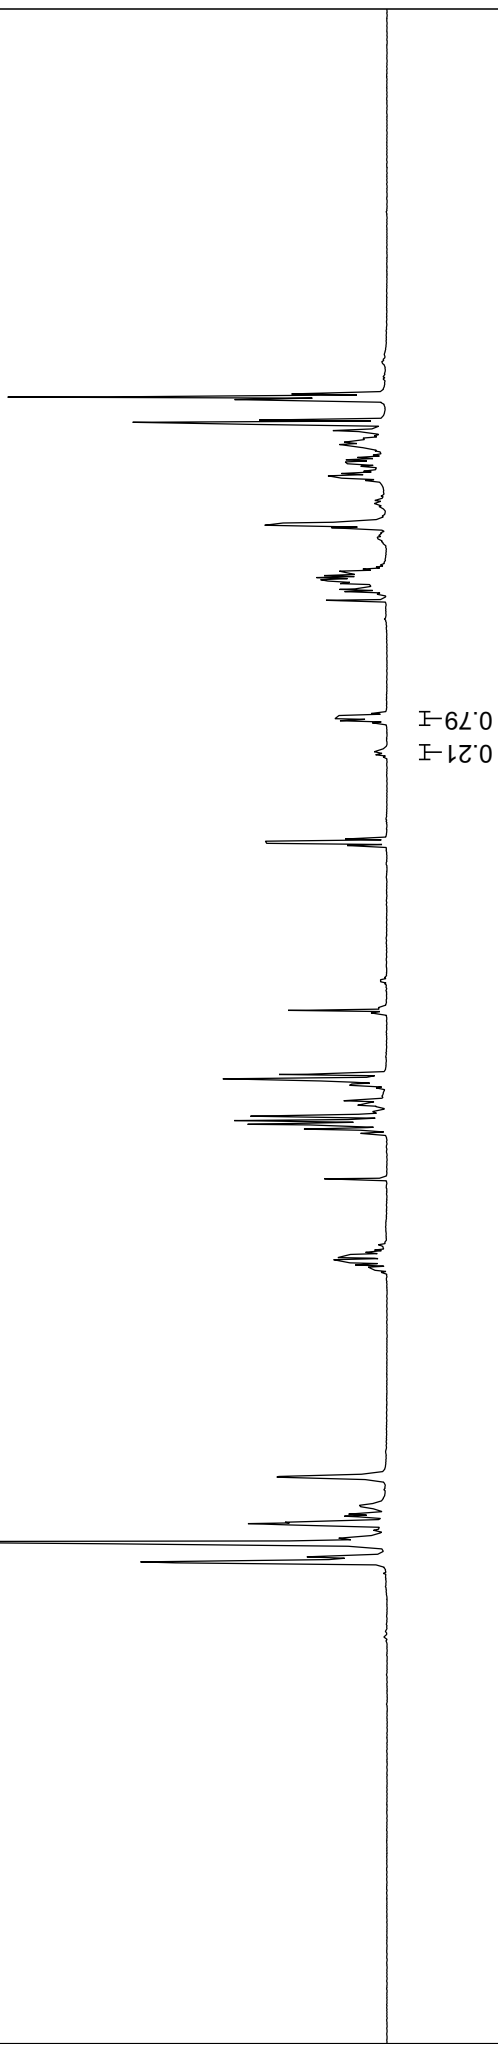

0.21 H  
0.79 H

1.0 9.5 9.0 8.5 8.0 7.5 7.0 6.5 6.0 5.5 5.0 4.5 4.0 3.5 3.0 2.5 2.0 1.5 1.0 0.5 0.0 -0.5 -1



| Parameter                | Value            |
|--------------------------|------------------|
| 1 Title                  | DVR04128D1.1.fid |
| 2 Solvent                | CDCl3            |
| 3 Temperature            | 298.2            |
| 4 Number of Scans        | 16               |
| 5 Receiver Gain          | 181              |
| 6 Relaxation Delay       | 1.0000           |
| 7 Pulse Width            | 10.7700          |
| 8 Spectrometer Frequency | 600.32           |
| 9 Nucleus                | <sup>1</sup> H   |

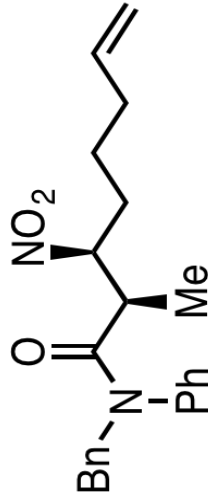

**10A**

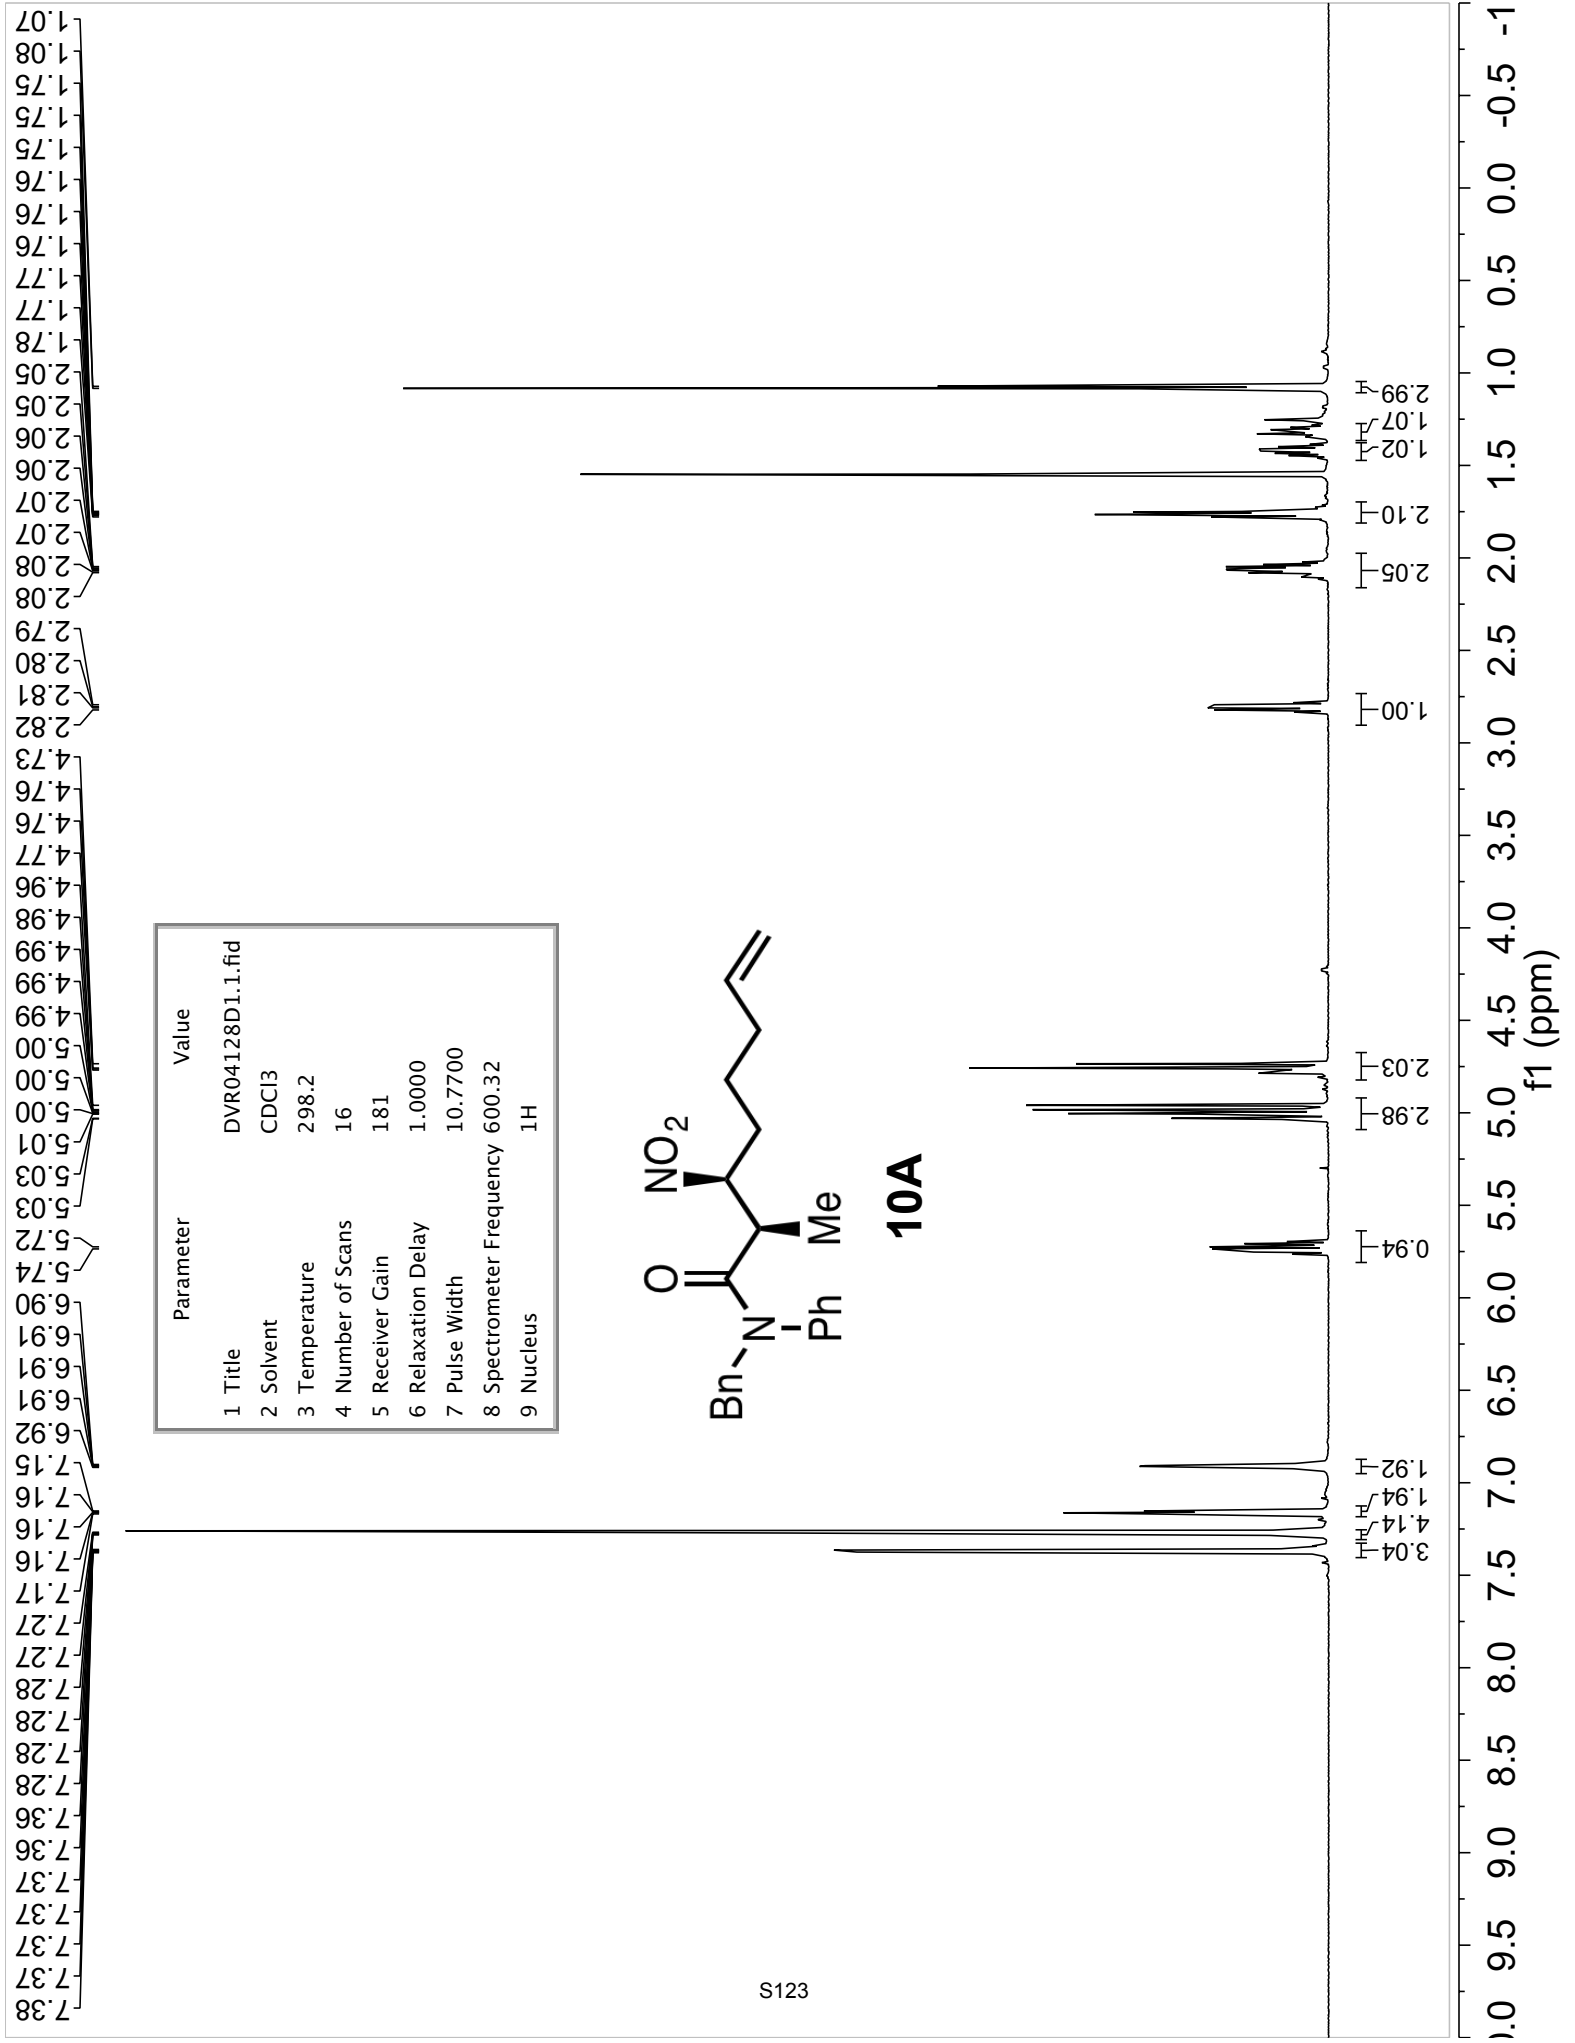

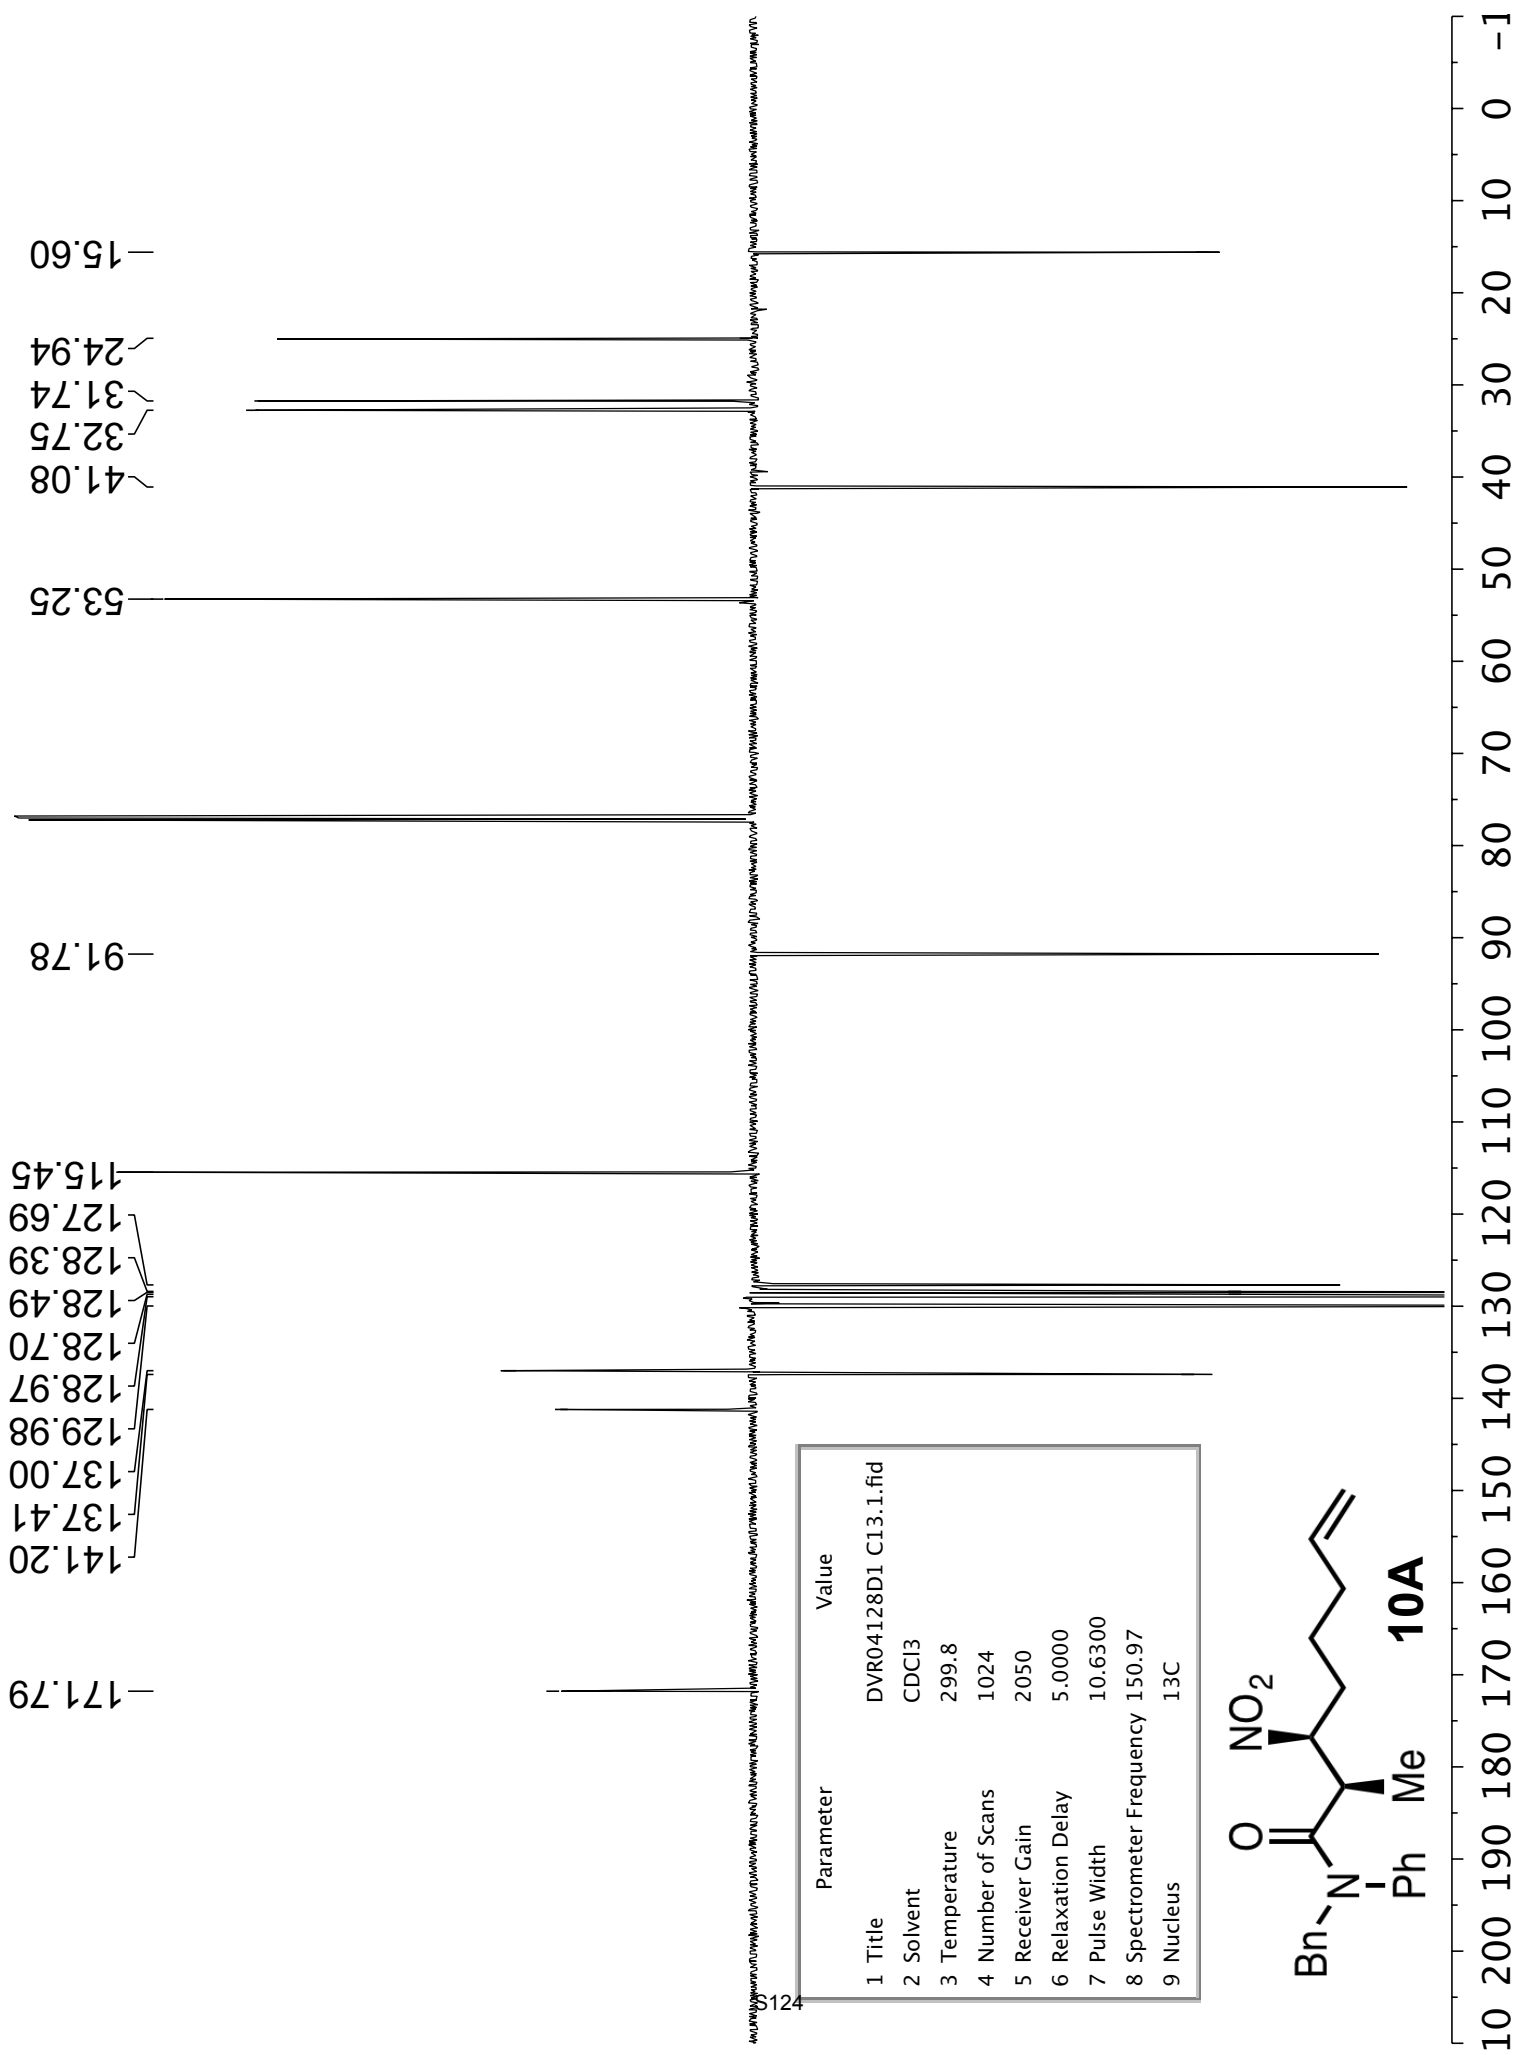

7.36  
7.36  
7.36  
7.35  
7.35  
7.34  
7.34  
7.33  
7.27  
7.27  
7.26  
7.26  
7.25  
7.25  
7.25  
7.24  
7.24  
7.24  
7.23  
7.12  
7.12  
7.12  
7.11  
7.11  
7.11  
7.07  
7.06  
7.06  
5.68  
5.67  
4.98  
4.98  
4.96  
4.96  
4.95  
4.95  
4.94  
4.94  
4.90  
4.90  
4.89  
4.89  
4.88  
4.87  
4.79  
4.77  
3.01  
2.99  
2.99  
2.98  
2.05  
2.05  
2.04  
2.02  
2.00  
1.65  
1.63  
1.35  
1.34  
1.33  
1.07  
1.06

| Parameter                | Value            |
|--------------------------|------------------|
| 1 Title                  | DVR04128D2.1.fid |
| 2 Solvent                | CDCl3            |
| 3 Temperature            | 297.5            |
| 4 Number of Scans        | 16               |
| 5 Receiver Gain          | 203              |
| 6 Relaxation Delay       | 1.0000           |
| 7 Pulse Width            | 10.7700          |
| 8 Spectrometer Frequency | 600.32           |
| 9 Nucleus                | <sup>1</sup> H   |

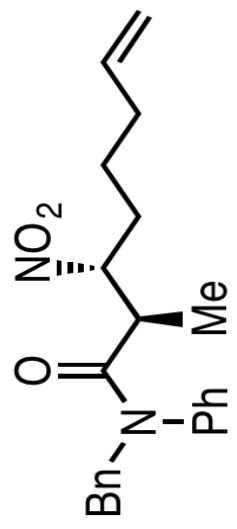

**10B**

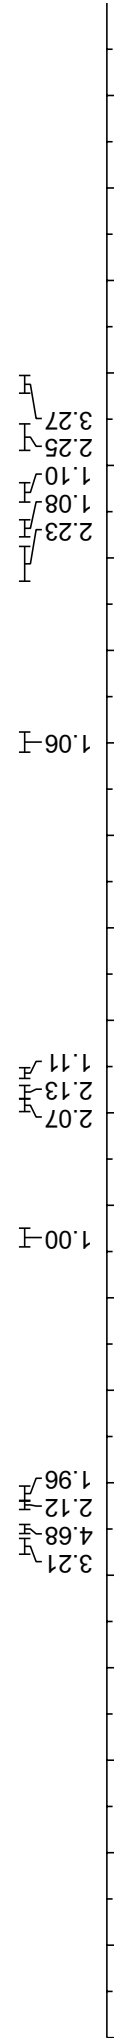

| Parameter                | Value                |
|--------------------------|----------------------|
| 1 Title                  | DVR04128D2 C13.1.fid |
| 2 Solvent                | CDCl3                |
| 3 Temperature            | 299.9                |
| 4 Number of Scans        | 1024                 |
| 5 Receiver Gain          | 2050                 |
| 6 Relaxation Delay       | 5.0000               |
| 7 Pulse Width            | 10.6300              |
| 8 Spectrometer Frequency | 150.97               |
| 9 Nucleus                | <sup>13</sup> C      |

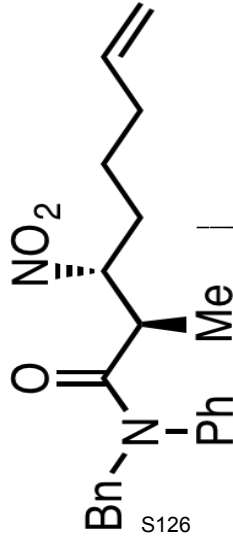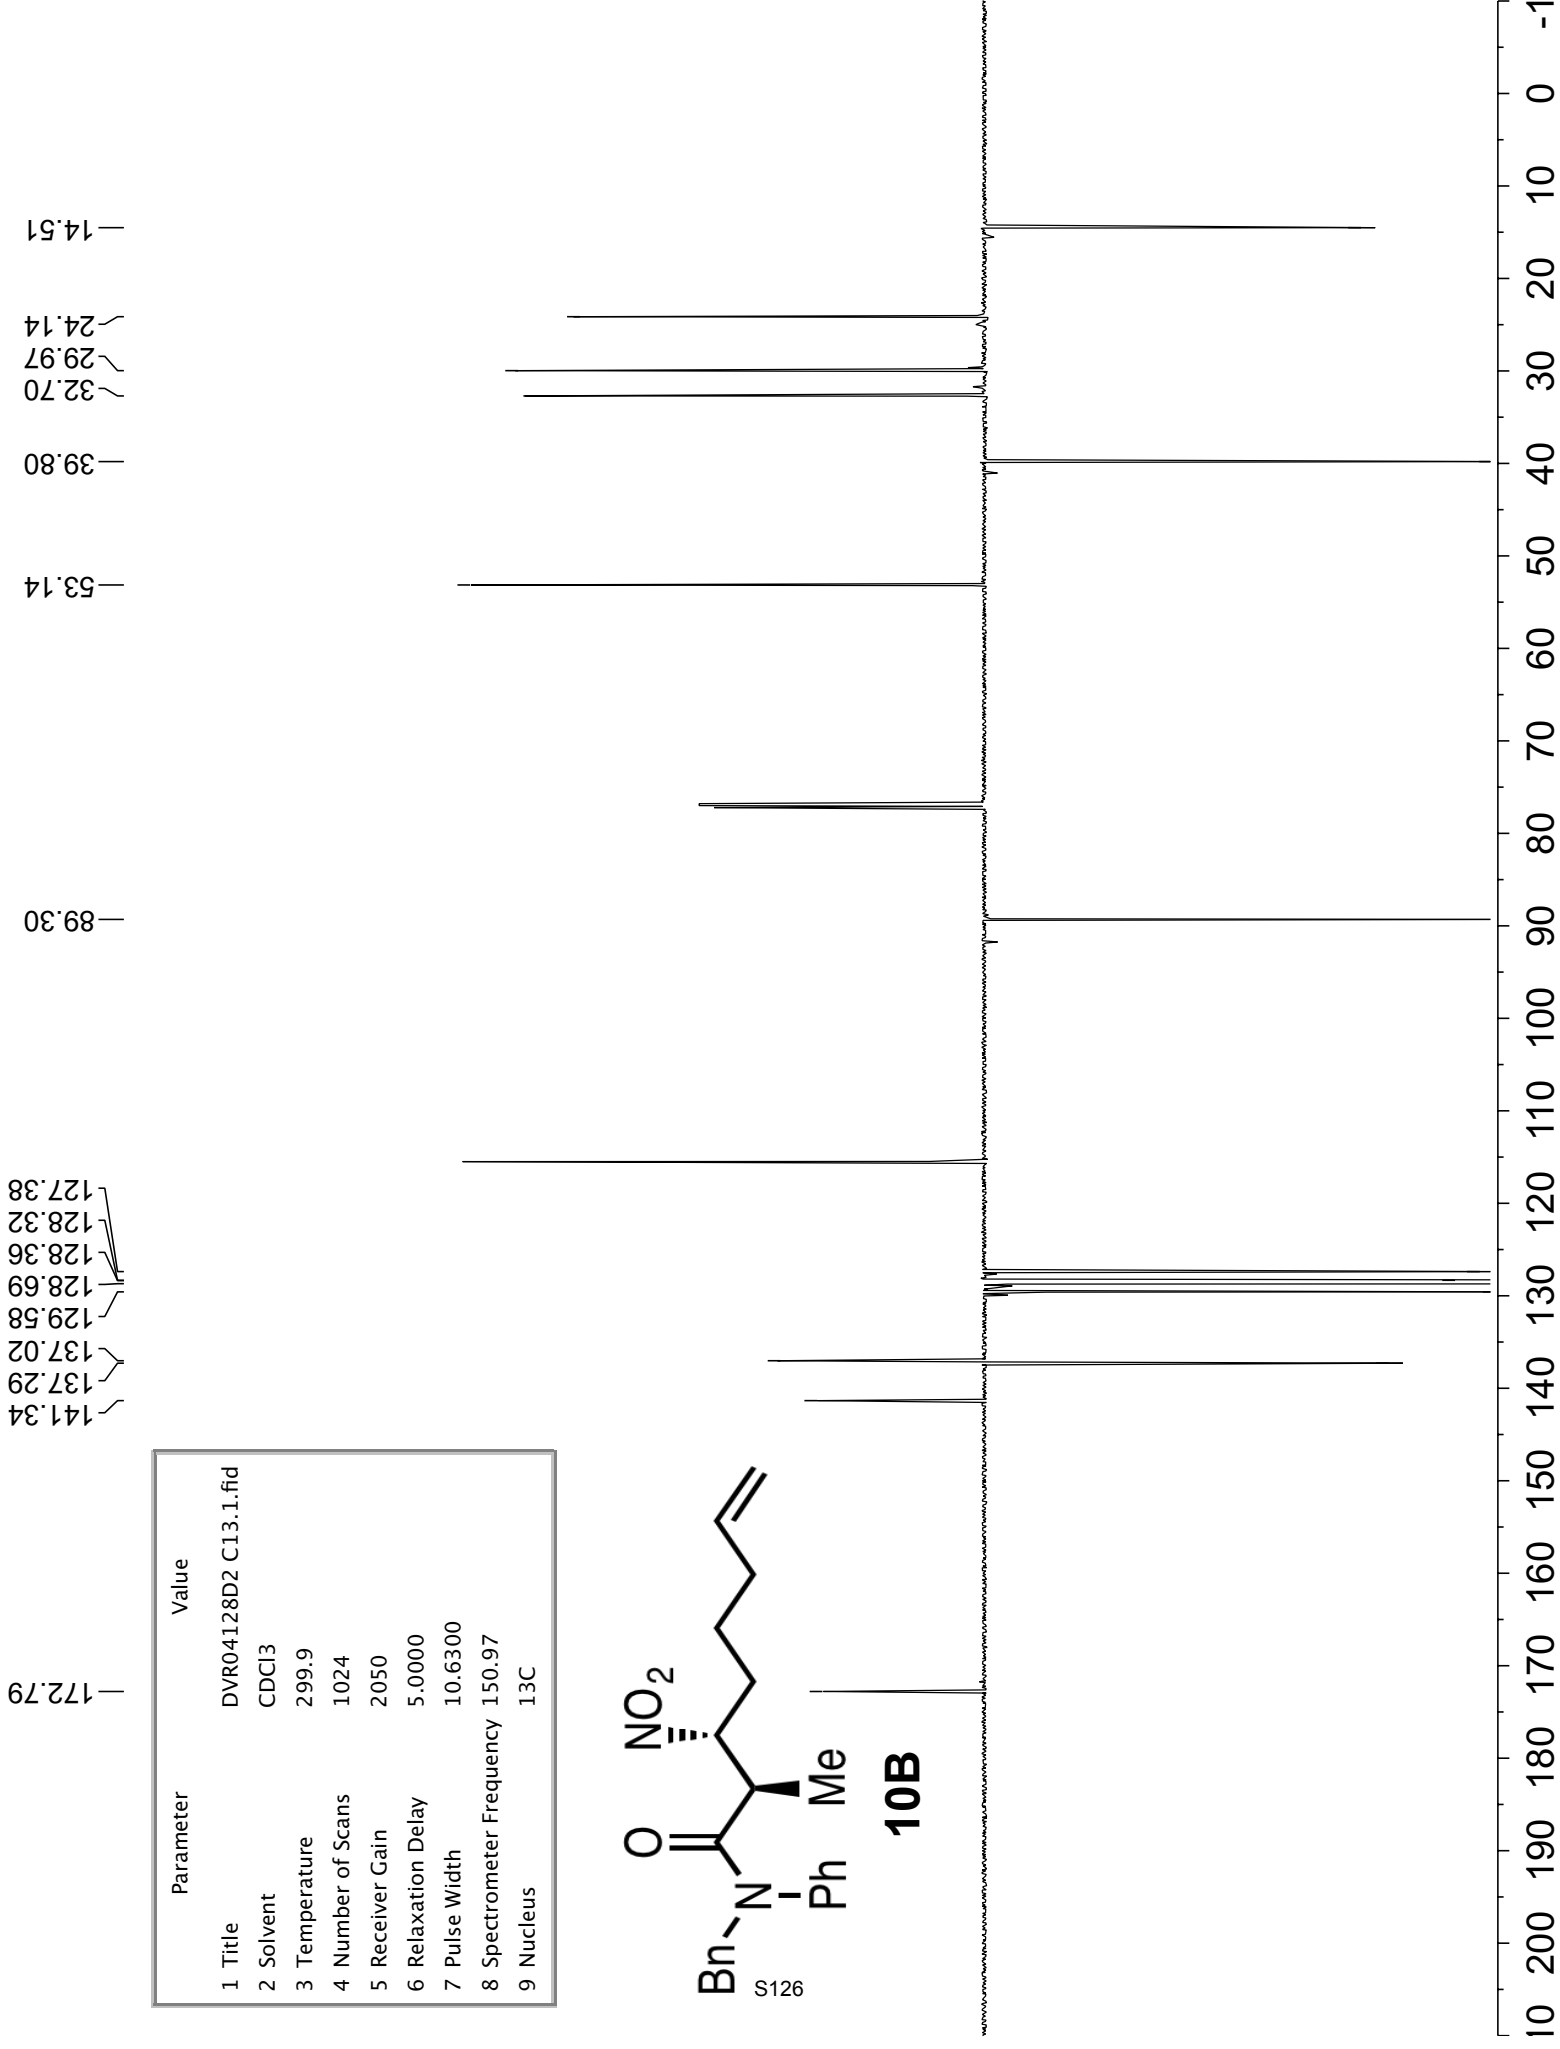

| Parameter                | Value             |
|--------------------------|-------------------|
| 1 Title                  | DVR04140CRD.1.fid |
| 2 Solvent                | CDCl3             |
| 3 Temperature            | 298.1             |
| 4 Number of Scans        | 16                |
| 5 Receiver Gain          | 144               |
| 6 Relaxation Delay       | 1.0000            |
| 7 Pulse Width            | 10.7700           |
| 8 Spectrometer Frequency | 600.32            |
| 9 Nucleus                | <sup>1</sup> H    |

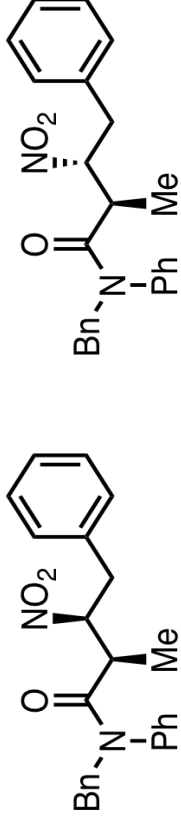

**Crude**  
**88:12**      **11B**

**11A**

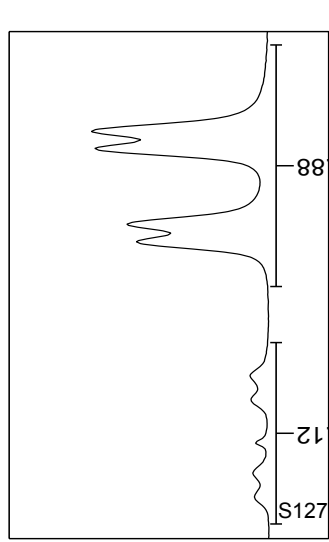

3.16   3.12   3.08   3.04

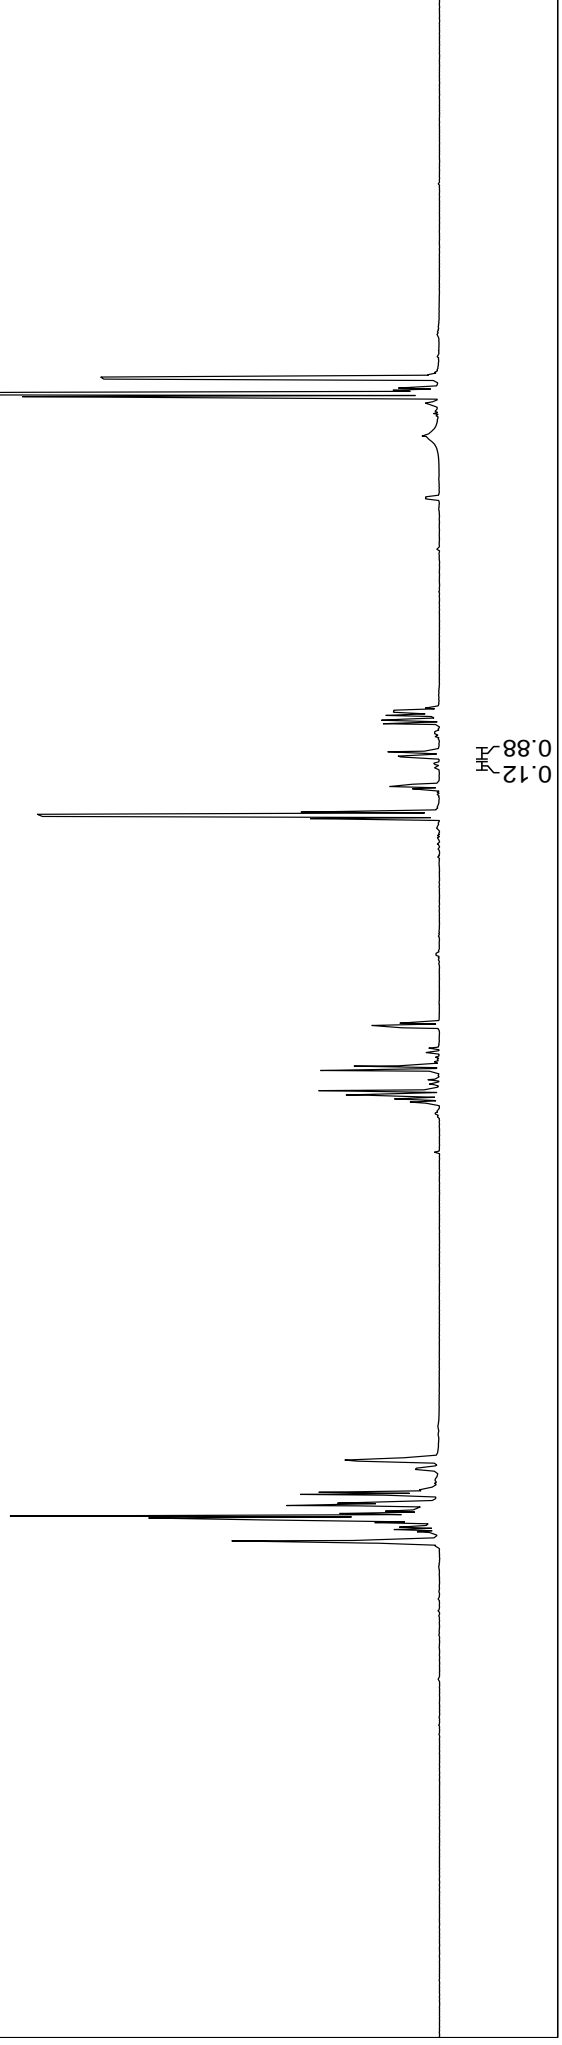

1.0 9.5 9.0 8.5 8.0 7.5 7.0 6.5 6.0 5.5 5.0 4.5 4.0 3.5 3.0 2.5 2.0 1.5 1.0 0.5 0.0 -0.5 -1

7.40  
7.39  
7.39  
7.38  
7.38  
7.28  
7.27  
7.27  
7.26  
7.26  
7.25  
7.25  
7.24  
7.24  
7.19  
7.19  
7.18  
7.18  
7.14  
7.14  
7.12  
6.95  
6.95  
6.94  
6.94  
6.03  
5.02  
5.01  
5.01  
5.00  
4.99  
4.99  
4.98  
4.96  
4.85  
4.82  
3.16  
3.15  
3.13  
3.13  
2.98  
2.96  
2.95  
2.94  
2.94  
2.93  
2.93  
2.92  
2.92  
2.91  
2.90  
2.89  
1.12  
1.11

| Parameter                | Value                |
|--------------------------|----------------------|
| 1 Title                  | DVR04140D1 SYN.1.fid |
| 2 Solvent                | CDCl3                |
| 3 Temperature            | 297.2                |
| 4 Number of Scans        | 16                   |
| 5 Receiver Gain          | 57                   |
| 6 Relaxation Delay       | 1.0000               |
| 7 Pulse Width            | 10.7700              |
| 8 Spectrometer Frequency | 600.32               |
| 9 Nucleus                | 1H                   |

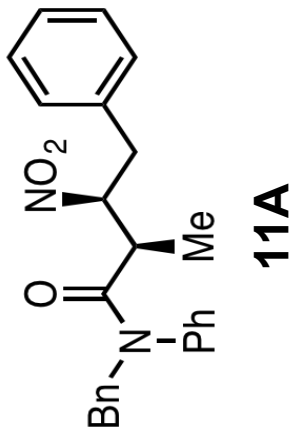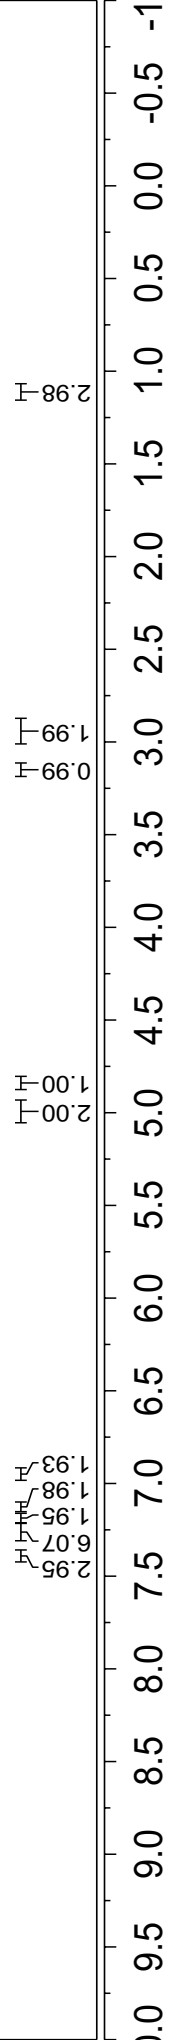

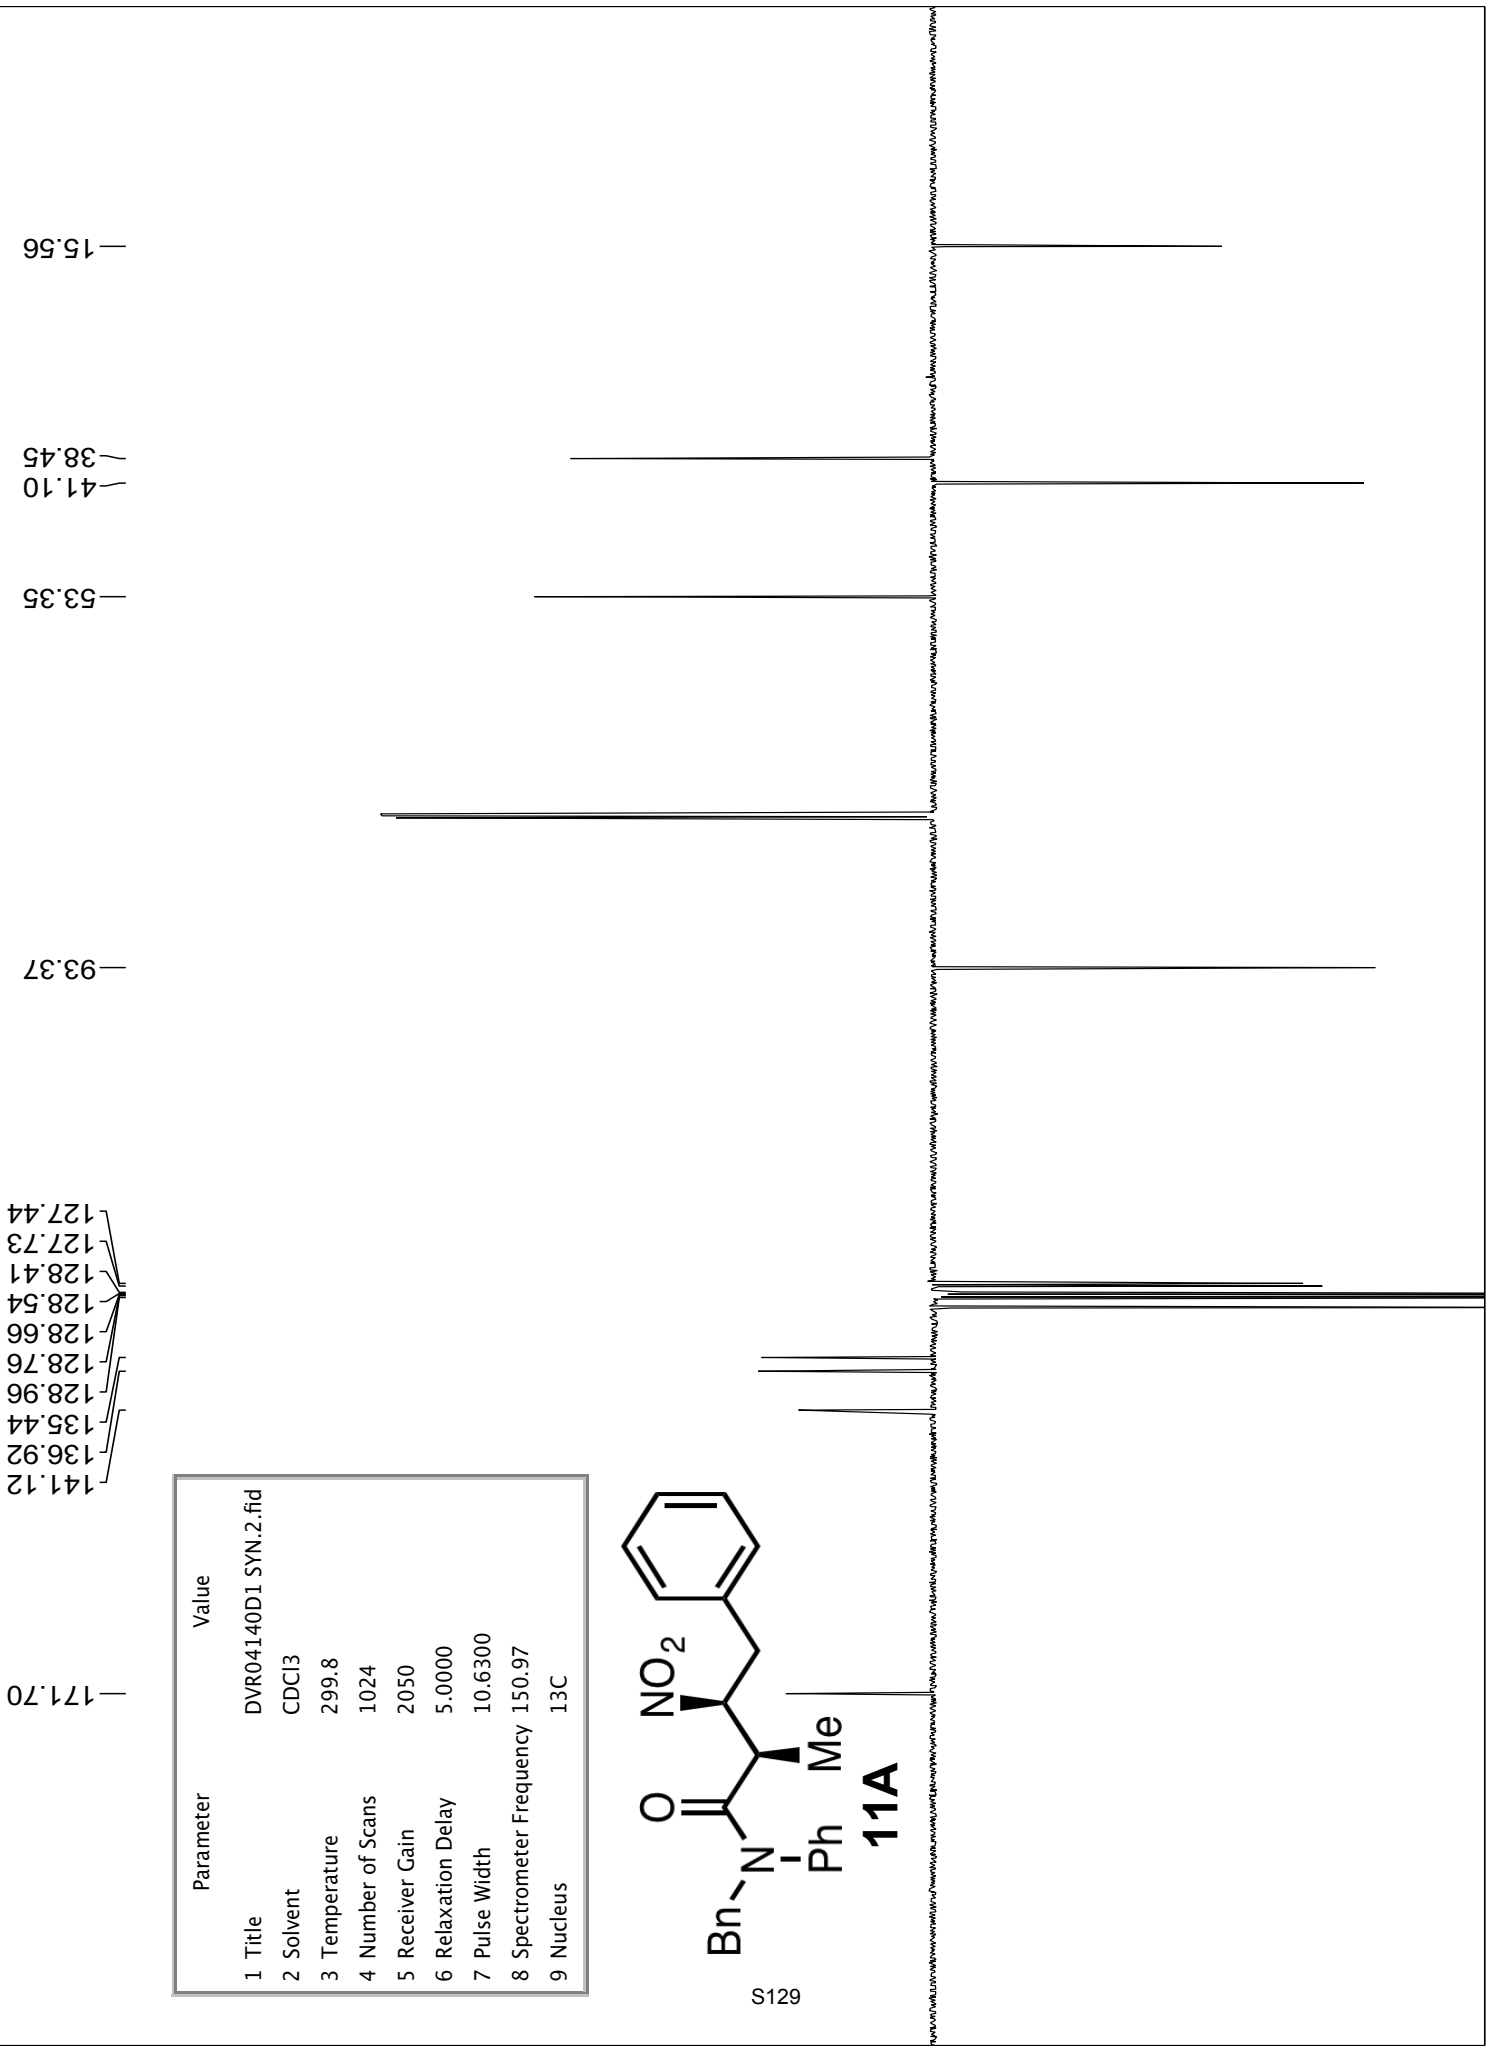

| Parameter                | Value                |
|--------------------------|----------------------|
| 1 Title                  | DVR04140D1 SYN.2.fid |
| 2 Solvent                | CDCl3                |
| 3 Temperature            | 299.8                |
| 4 Number of Scans        | 1024                 |
| 5 Receiver Gain          | 2050                 |
| 6 Relaxation Delay       | 5.0000               |
| 7 Pulse Width            | 10.6300              |
| 8 Spectrometer Frequency | 150.97               |
| 9 Nucleus                | <sup>13</sup> C      |

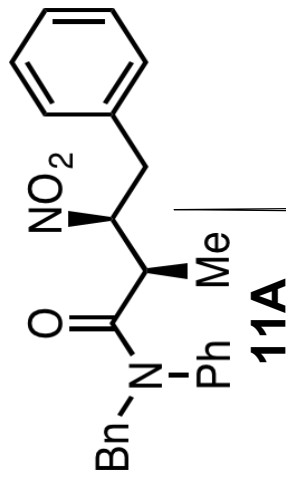

7.32  
7.32  
7.30  
7.30  
7.29  
7.26  
7.26  
7.25  
7.25  
7.25  
7.24  
7.24  
7.24  
7.23  
7.23  
7.23  
7.22  
7.21  
7.21  
7.21  
7.12  
7.11  
7.11  
7.11  
7.11  
7.02  
7.02  
7.01  
7.00  
7.00  
7.00  
6.99  
5.11  
5.10  
5.09  
5.09  
5.08  
5.07  
4.93  
4.90  
4.76  
4.73  
3.23  
3.22  
3.20  
3.07  
3.05  
3.05  
3.04  
3.04  
3.03  
3.03  
2.93  
2.92  
2.91  
2.90  
1.19  
1.18

| Parameter                | Value                 |
|--------------------------|-----------------------|
| 1 Title                  | DVR04140D2 ANTI.1.fid |
| 2 Solvent                | CDCl3                 |
| 3 Temperature            | 297.2                 |
| 4 Number of Scans        | 16                    |
| 5 Receiver Gain          | 161                   |
| 6 Relaxation Delay       | 1.0000                |
| 7 Pulse Width            | 10.7700               |
| 8 Spectrometer Frequency | 600.32                |
| 9 Nucleus                | 1H                    |

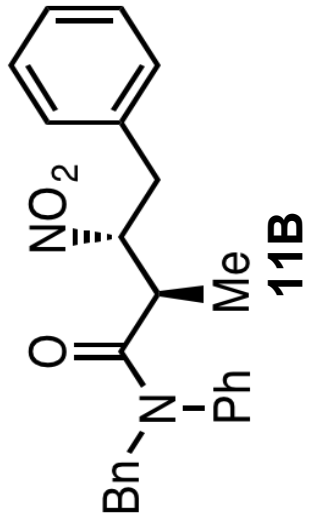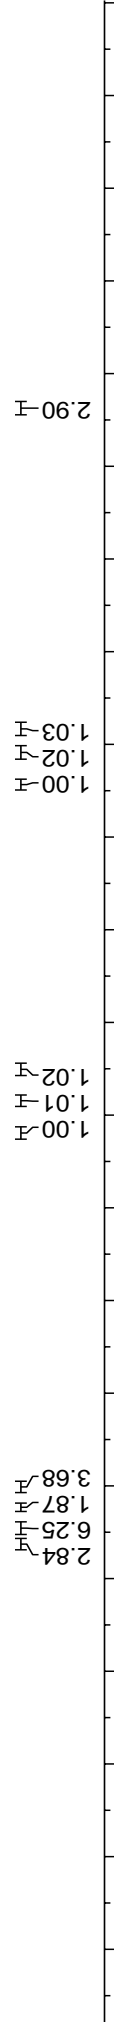



| Parameter                | Value                 |
|--------------------------|-----------------------|
| 1 Title                  | DVR04140D2 ANTI.2.fid |
| 2 Solvent                | CDCl3                 |
| 3 Temperature            | 299.9                 |
| 4 Number of Scans        | 1024                  |
| 5 Receiver Gain          | 2050                  |
| 6 Relaxation Delay       | 5.0000                |
| 7 Pulse Width            | 10.6300               |
| 8 Spectrometer Frequency | 150.97                |
| 9 Nucleus                | <sup>13</sup> C       |

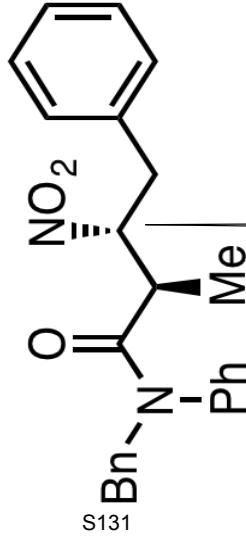

**11B**

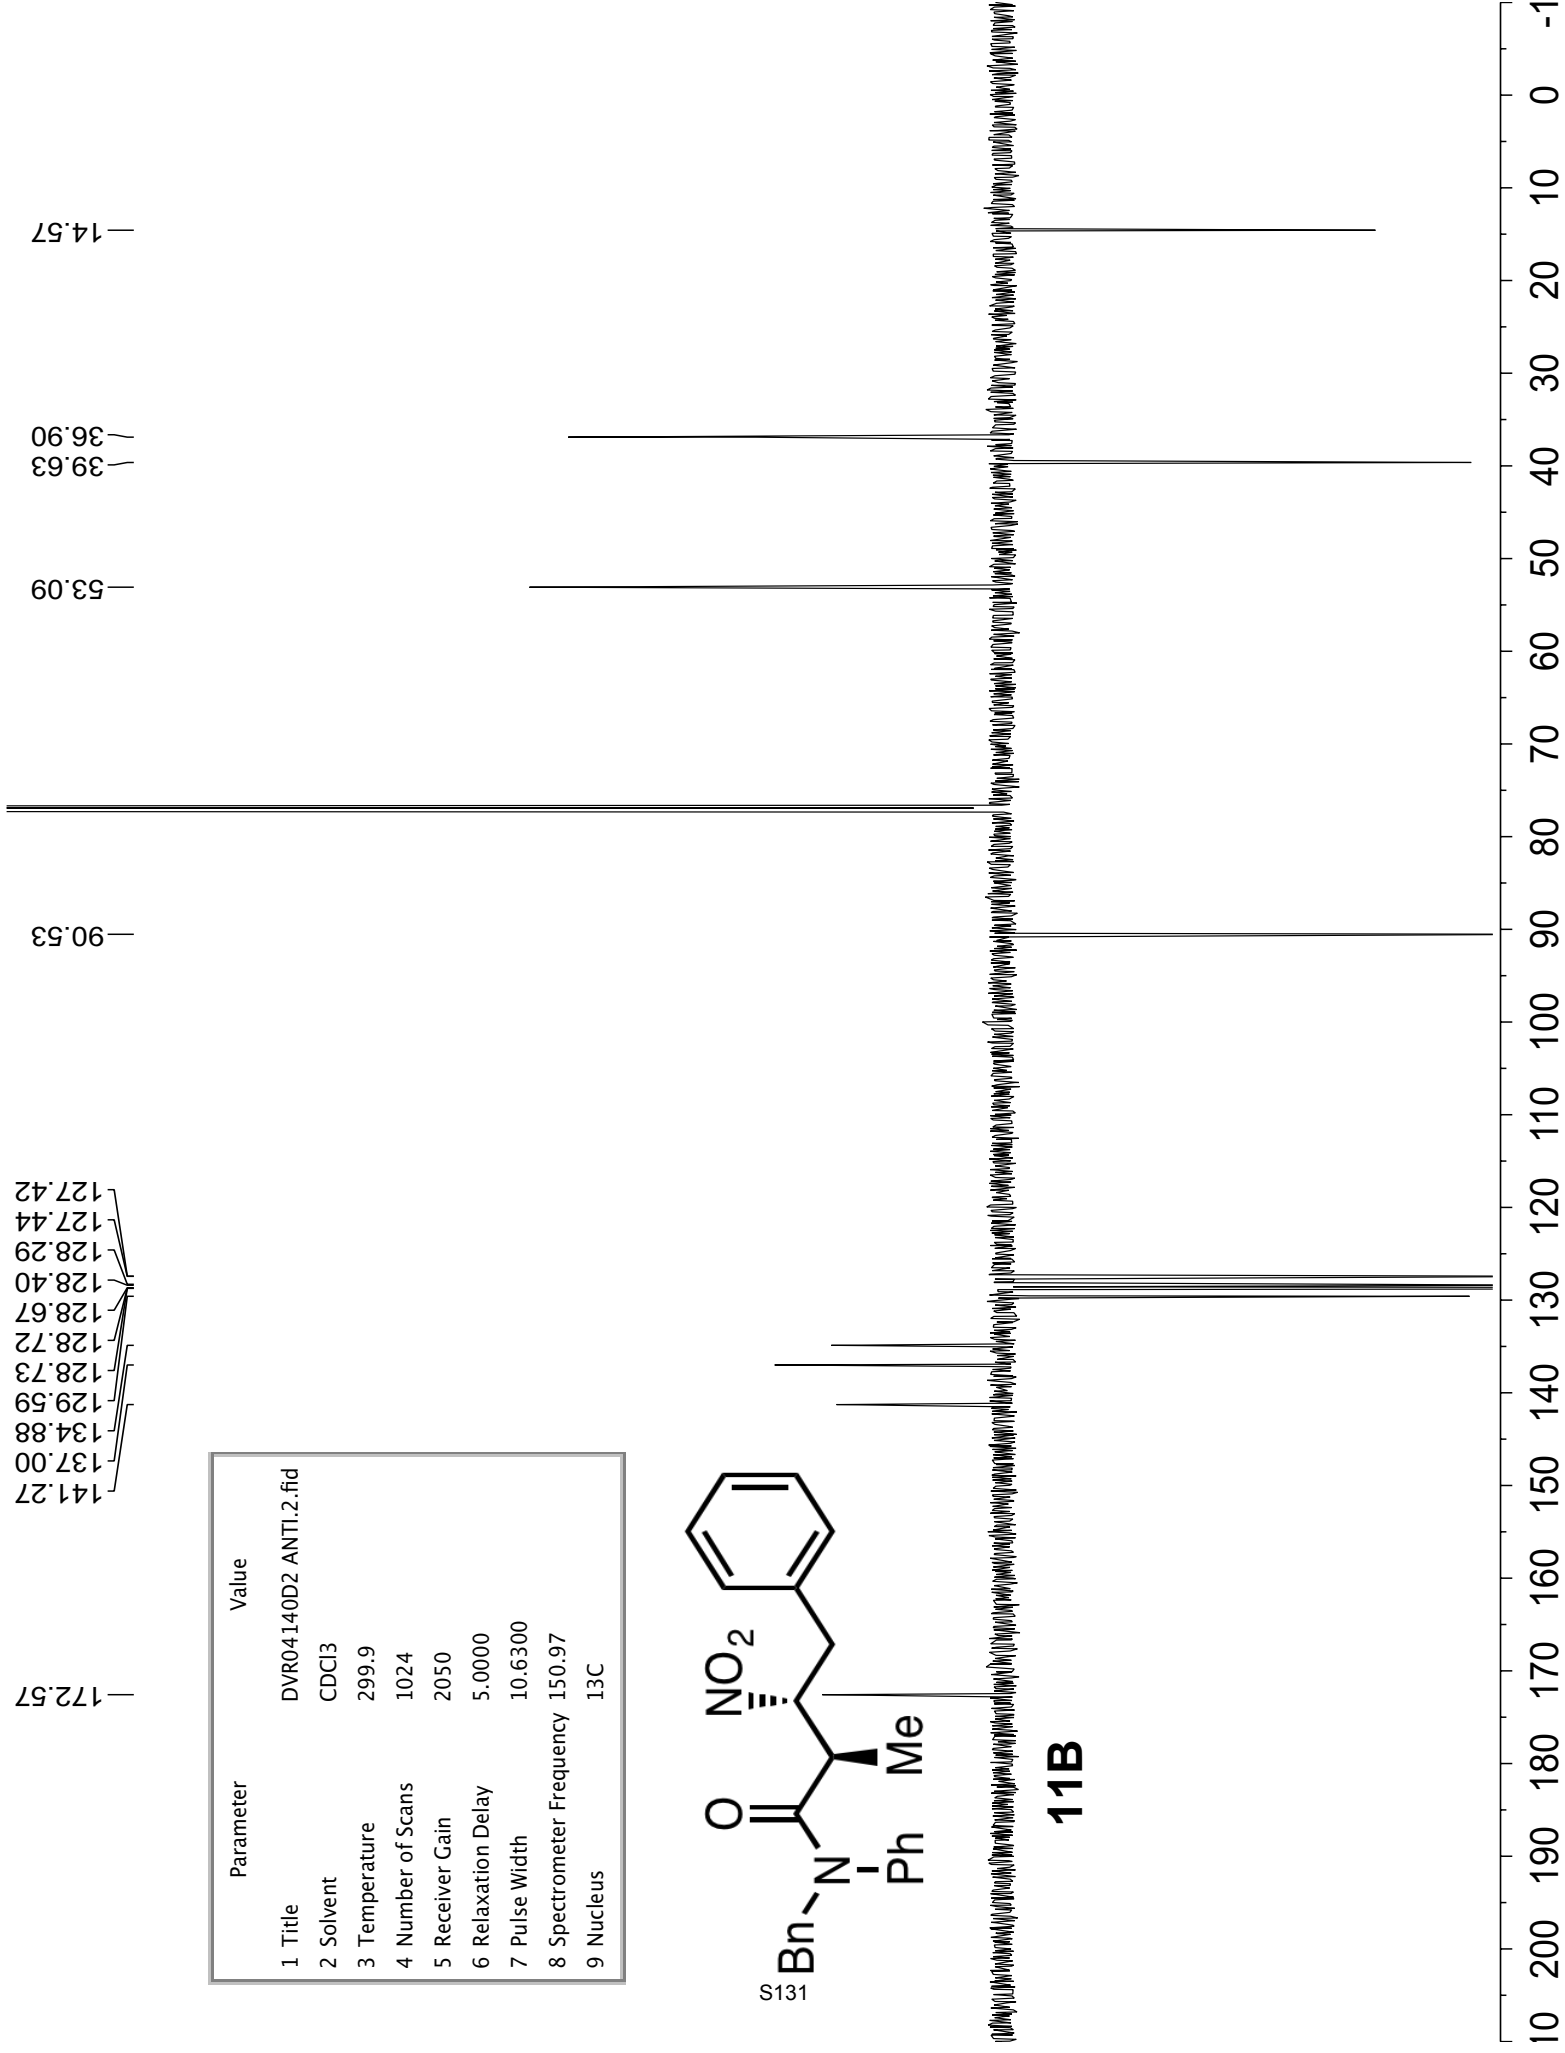

Parameter Value

1 Title DVR04148CRD.1.fid  
2 Solvent CDCl3  
3 Temperature 298.2  
4 Number of Scans 16  
5 Receiver Gain 9  
6 Relaxation Delay 1.0000  
7 Pulse Width 15.0000  
8 Spectrometer Frequency 400.13  
9 Nucleus 1H

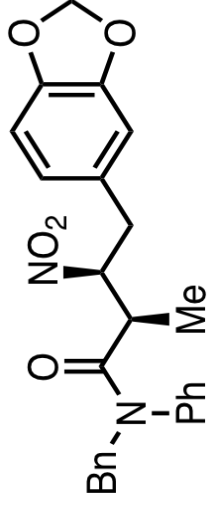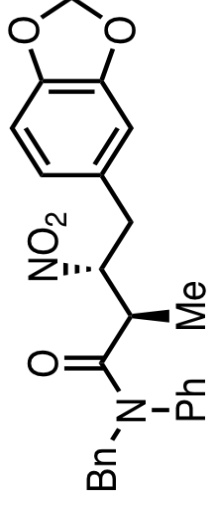

**Crude**

**12A**

**87:13**

**12B**

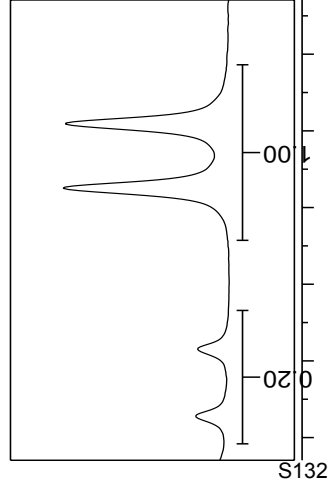

1.16 1.12 1.08

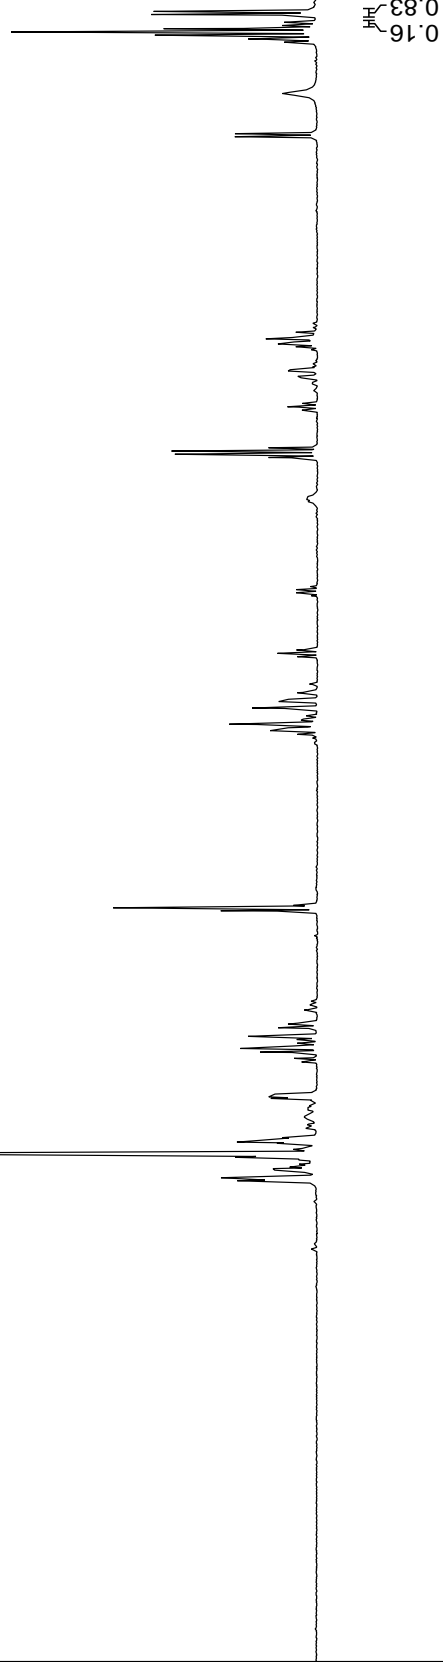

0.88  
0.16

10.0 9.5 9.0 8.5 8.0 7.5 7.0 6.5 6.0 5.5 5.0 4.5 4.0 3.5 3.0 2.5 2.0 1.5 1.0 0.5 0.0 -0.5 -1



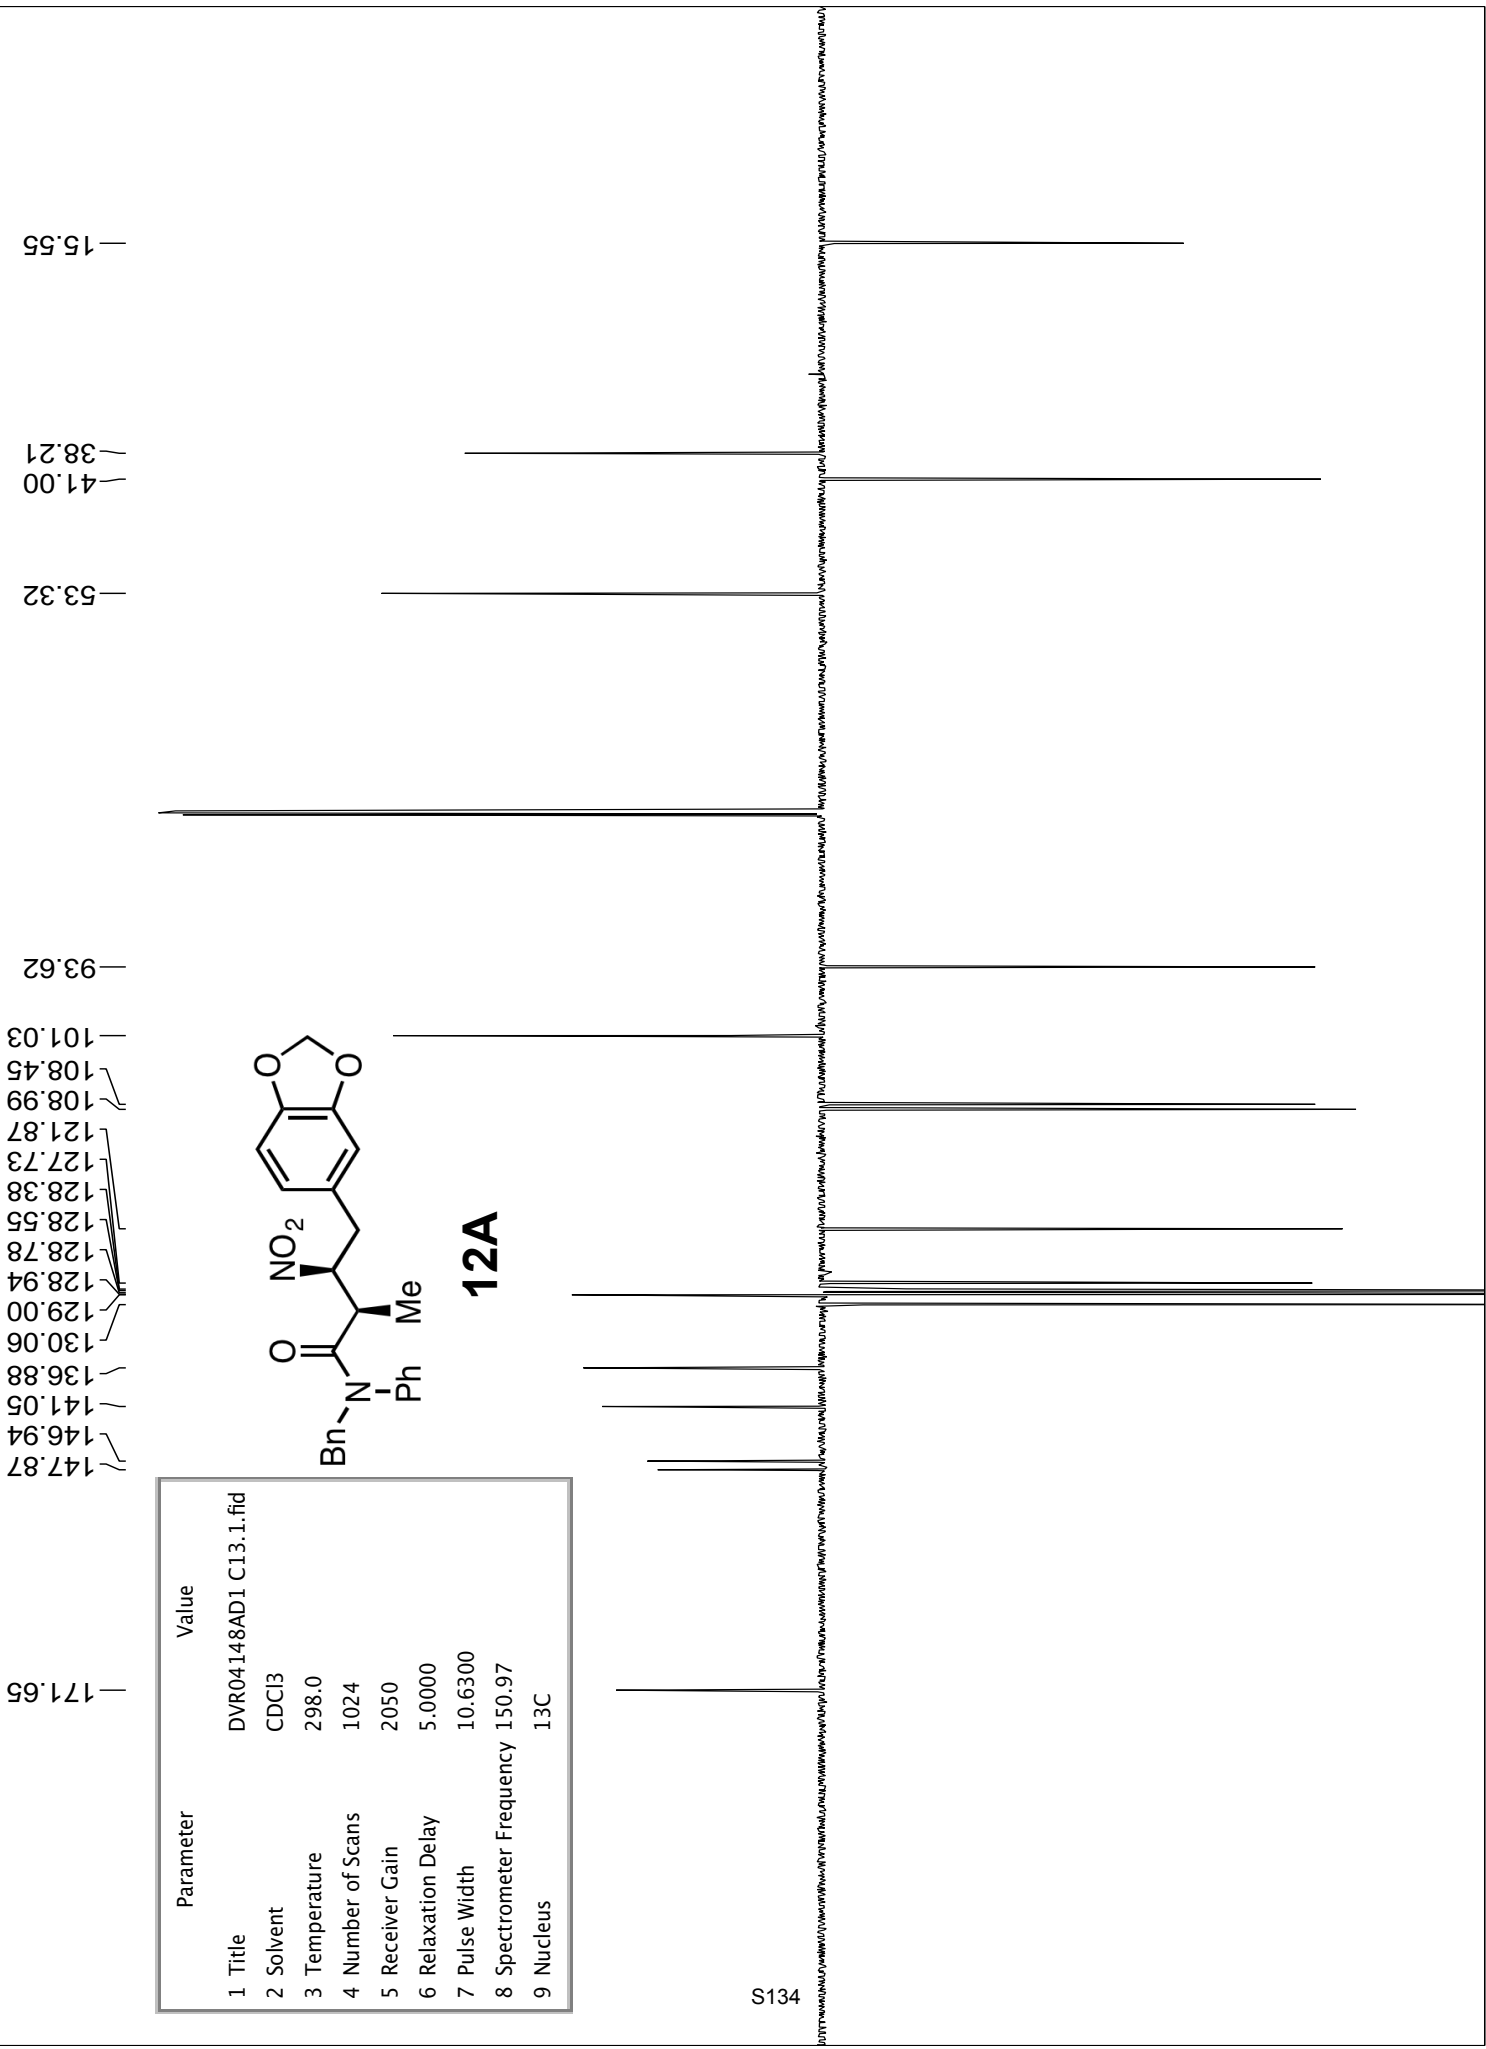

| Parameter                | Value                 |
|--------------------------|-----------------------|
| 1 Title                  | DVR04148AD1 C13.1.fid |
| 2 Solvent                | CDC13                 |
| 3 Temperature            | 298.0                 |
| 4 Number of Scans        | 1024                  |
| 5 Receiver Gain          | 2050                  |
| 6 Relaxation Delay       | 5.0000                |
| 7 Pulse Width            | 10.6300               |
| 8 Spectrometer Frequency | 150.97                |
| 9 Nucleus                | 13C                   |

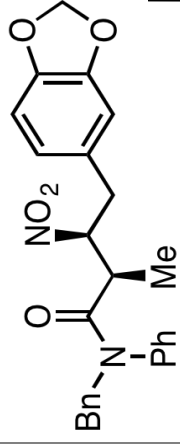

**12A**

7.33  
7.32  
7.32  
7.31  
7.26  
7.12  
7.12  
7.11  
7.11  
7.11  
7.10  
7.02  
7.02  
7.01  
7.01  
6.66  
6.65  
6.49  
6.49  
6.46  
6.46  
6.45  
6.44  
6.44  
5.93  
5.93  
5.92  
5.92  
5.04  
5.03  
5.02  
5.02  
5.01  
5.00  
4.92  
4.90  
4.76  
4.74  
3.14  
3.13  
3.11  
3.11  
3.05  
3.03  
3.03  
3.02  
3.01  
3.01  
2.84  
2.82  
2.81  
2.80  
1.17  
1.16

| Parameter                | Value             |
|--------------------------|-------------------|
| 1 Title                  | DVR04148AD2.1.fid |
| 2 Solvent                | CDCl3             |
| 3 Temperature            | 298.2             |
| 4 Number of Scans        | 16                |
| 5 Receiver Gain          | 228               |
| 6 Relaxation Delay       | 1.0000            |
| 7 Pulse Width            | 10.7700           |
| 8 Spectrometer Frequency | 600.32            |
| 9 Nucleus                | <sup>1</sup> H    |

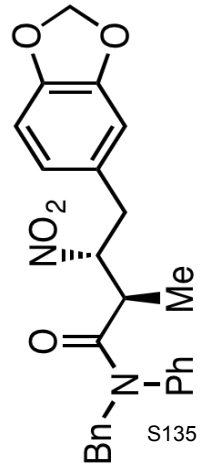

12B

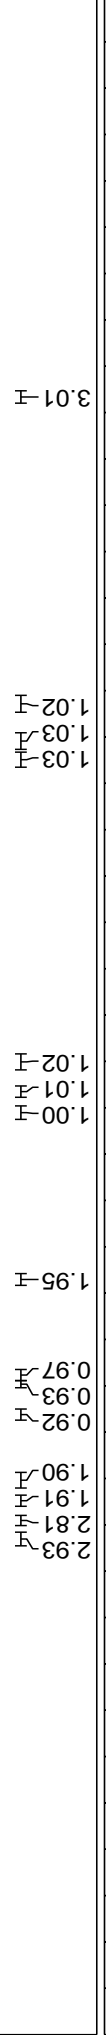

10.0 9.5 9.0 8.5 8.0 7.5 7.0 6.5 6.0 5.5 5.0 4.5 4.0 3.5 3.0 2.5 2.0 1.5 1.0 0.5 0.0 -0.5

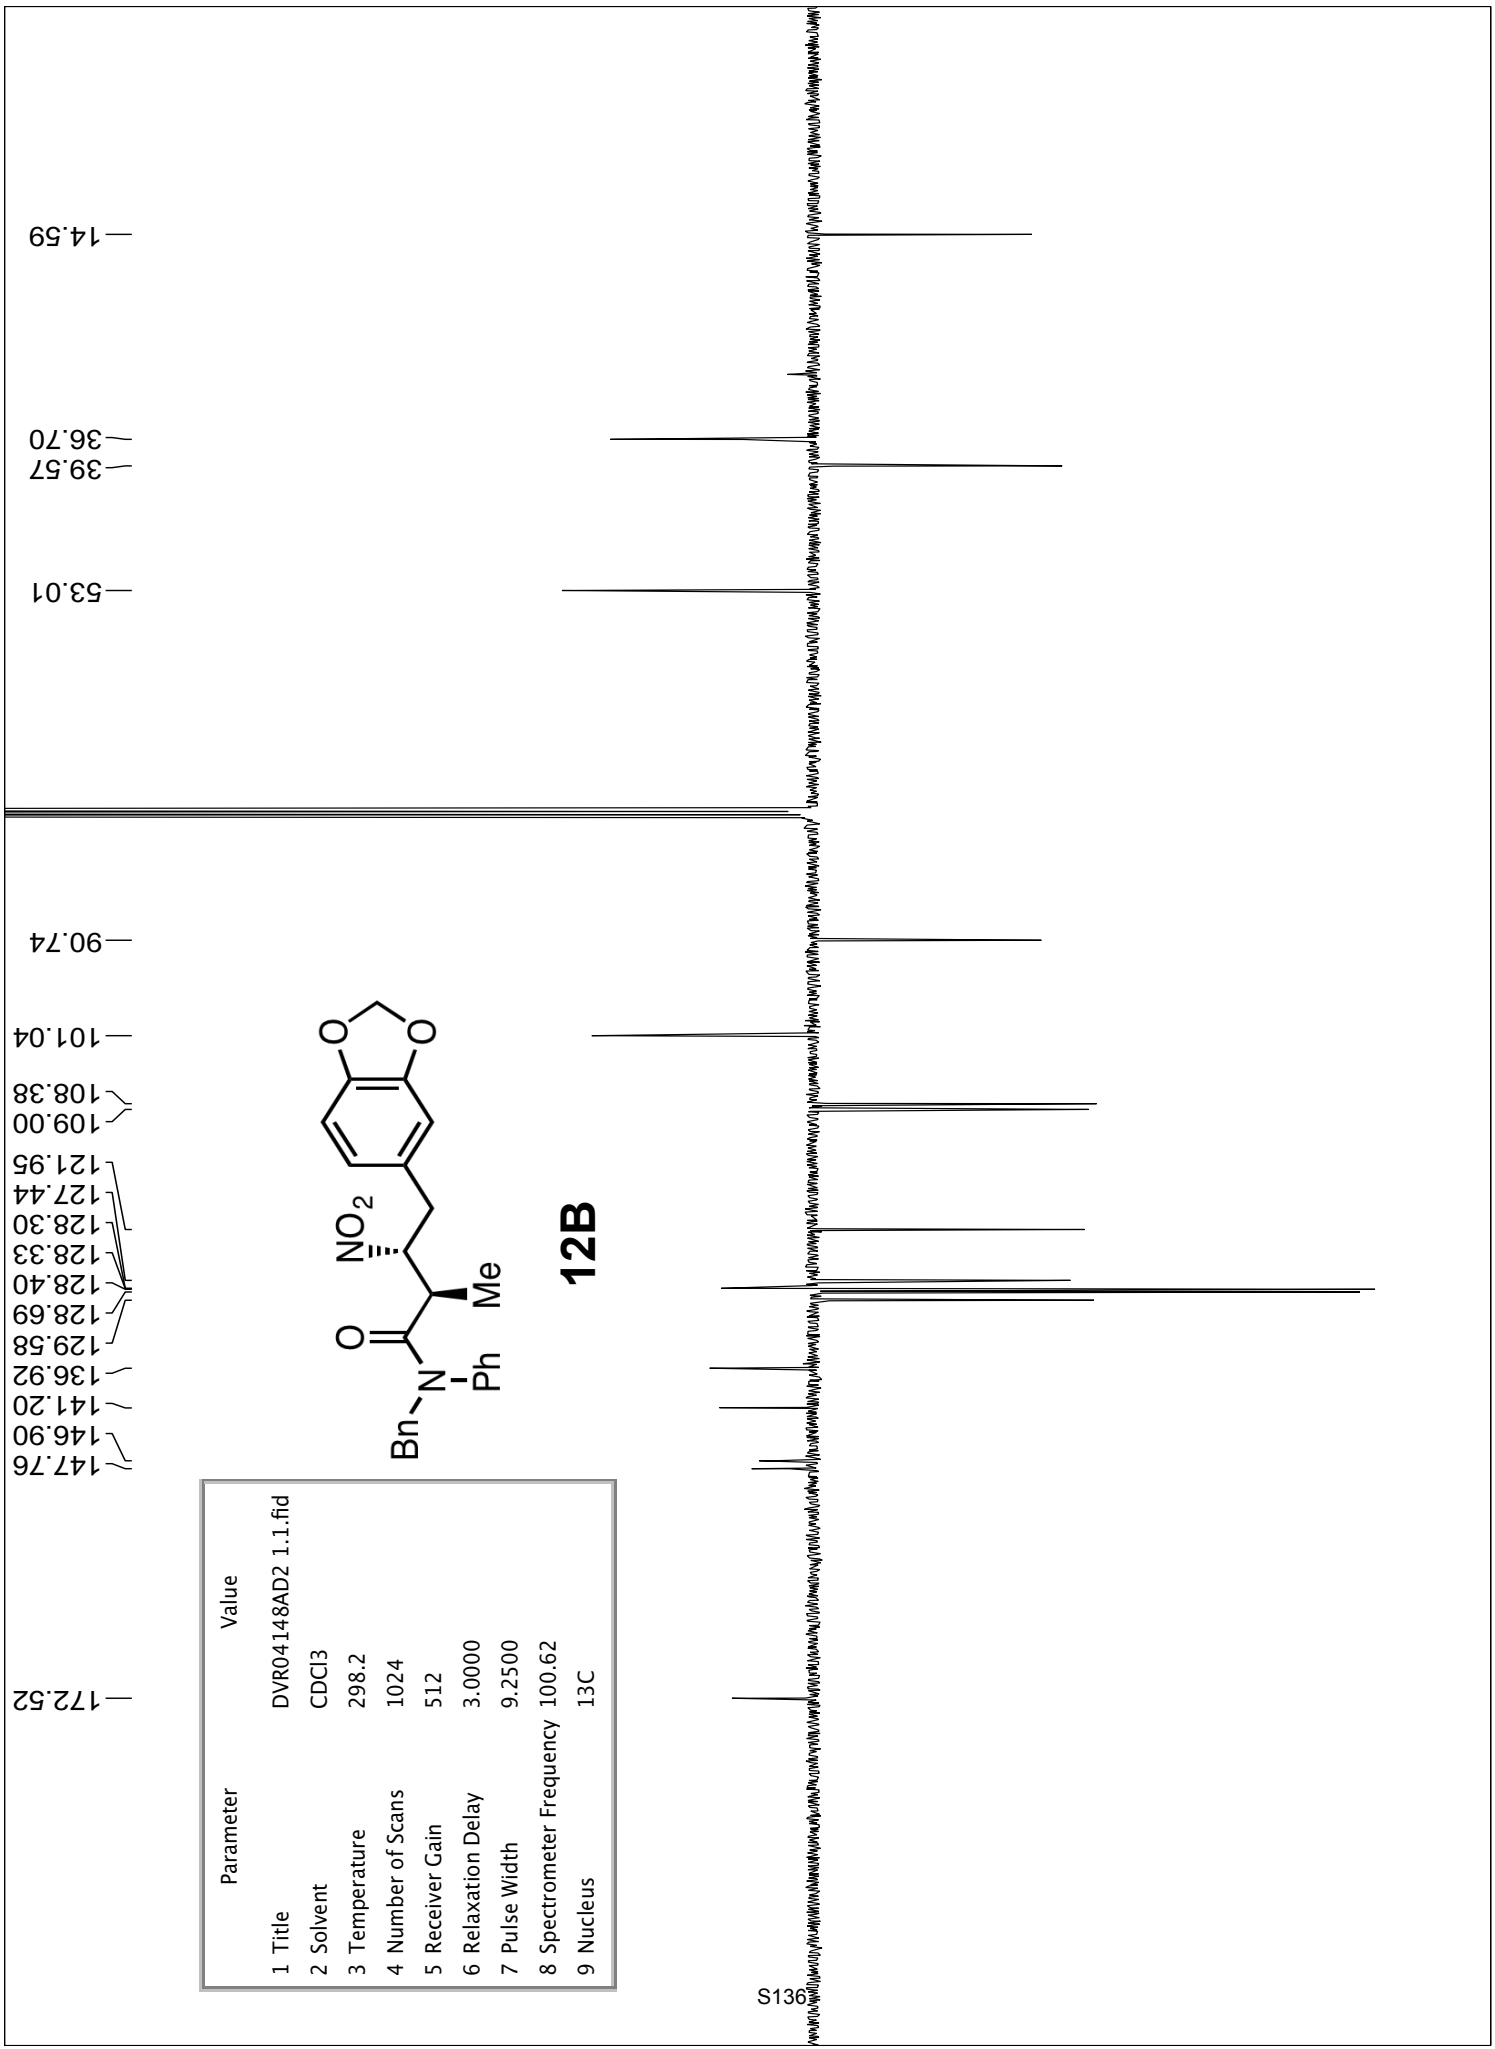

S136

| Parameter                | Value             |
|--------------------------|-------------------|
| 1 Title                  | DVR04167CRD.1.fid |
| 2 Solvent                | CDCI3             |
| 3 Temperature            | 298.0             |
| 4 Number of Scans        | 16                |
| 5 Receiver Gain          | 128               |
| 6 Relaxation Delay       | 1.0000            |
| 7 Pulse Width            | 10.7700           |
| 8 Spectrometer Frequency | 600.32            |
| 9 Nucleus                | <sup>1</sup> H    |

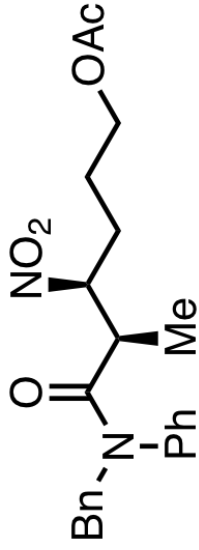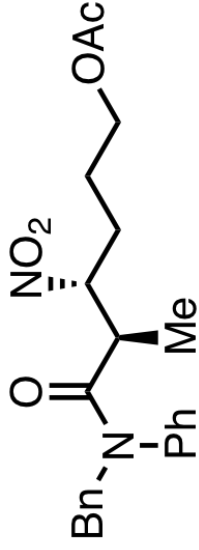

**Crude**

**72:28**

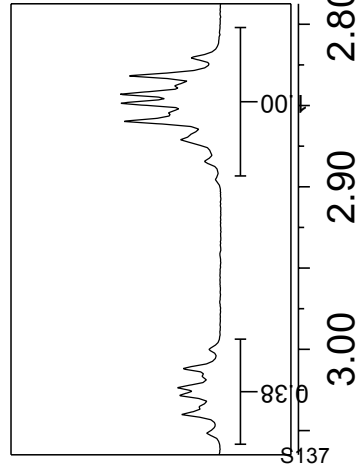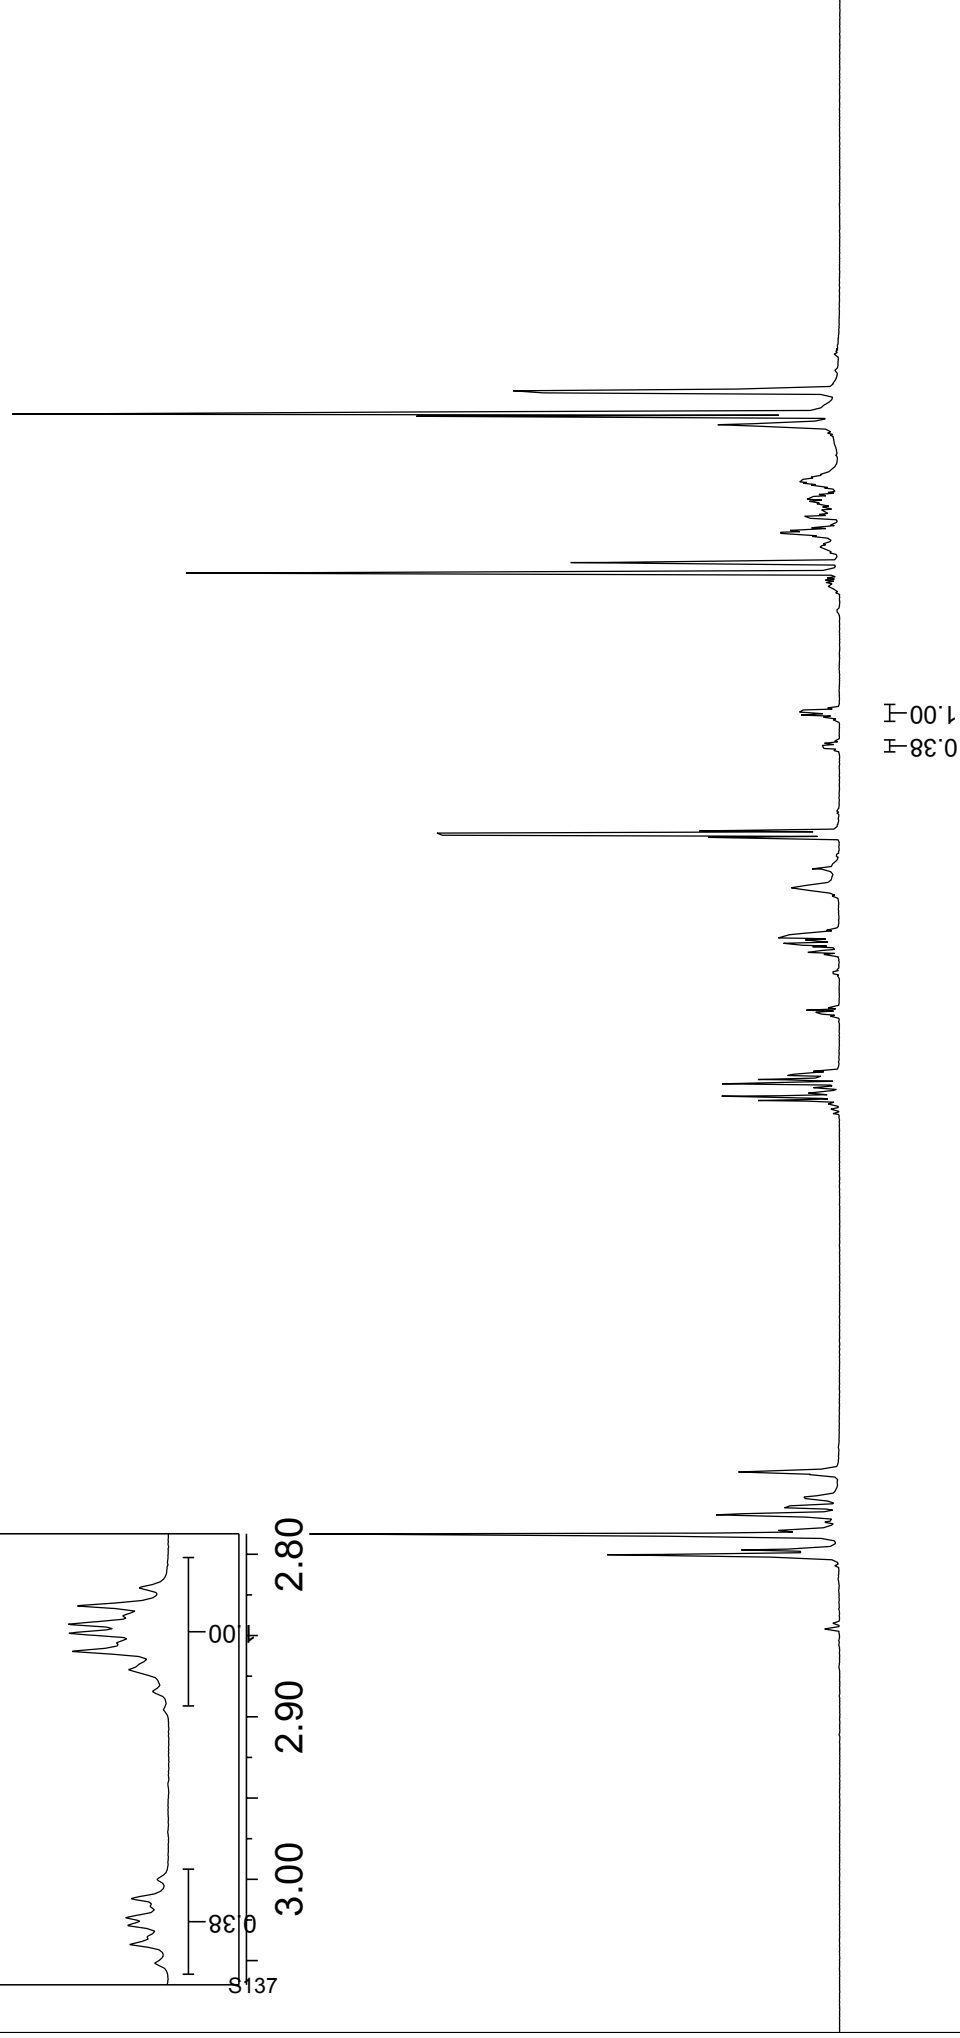

9.5 9.0 8.5 8.0 7.5 7.0 6.5 6.0 5.5 5.0 4.5 4.0 3.5 3.0 2.5 2.0 1.5 1.0 0.5 0.0 -0.5 -1

| Parameter                | Value            |
|--------------------------|------------------|
| 1 Title                  | DVR04167D1.1.fid |
| 2 Solvent                | CDCl3            |
| 3 Temperature            | 298.0            |
| 4 Number of Scans        | 16               |
| 5 Receiver Gain          | 128              |
| 6 Relaxation Delay       | 1.0000           |
| 7 Pulse Width            | 10.7700          |
| 8 Spectrometer Frequency | 600.32           |
| 9 Nucleus                | <sup>1</sup> H   |

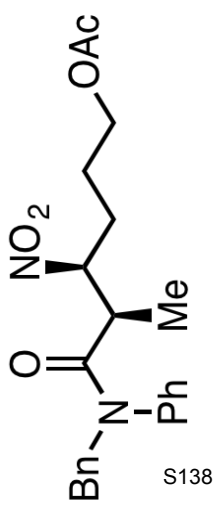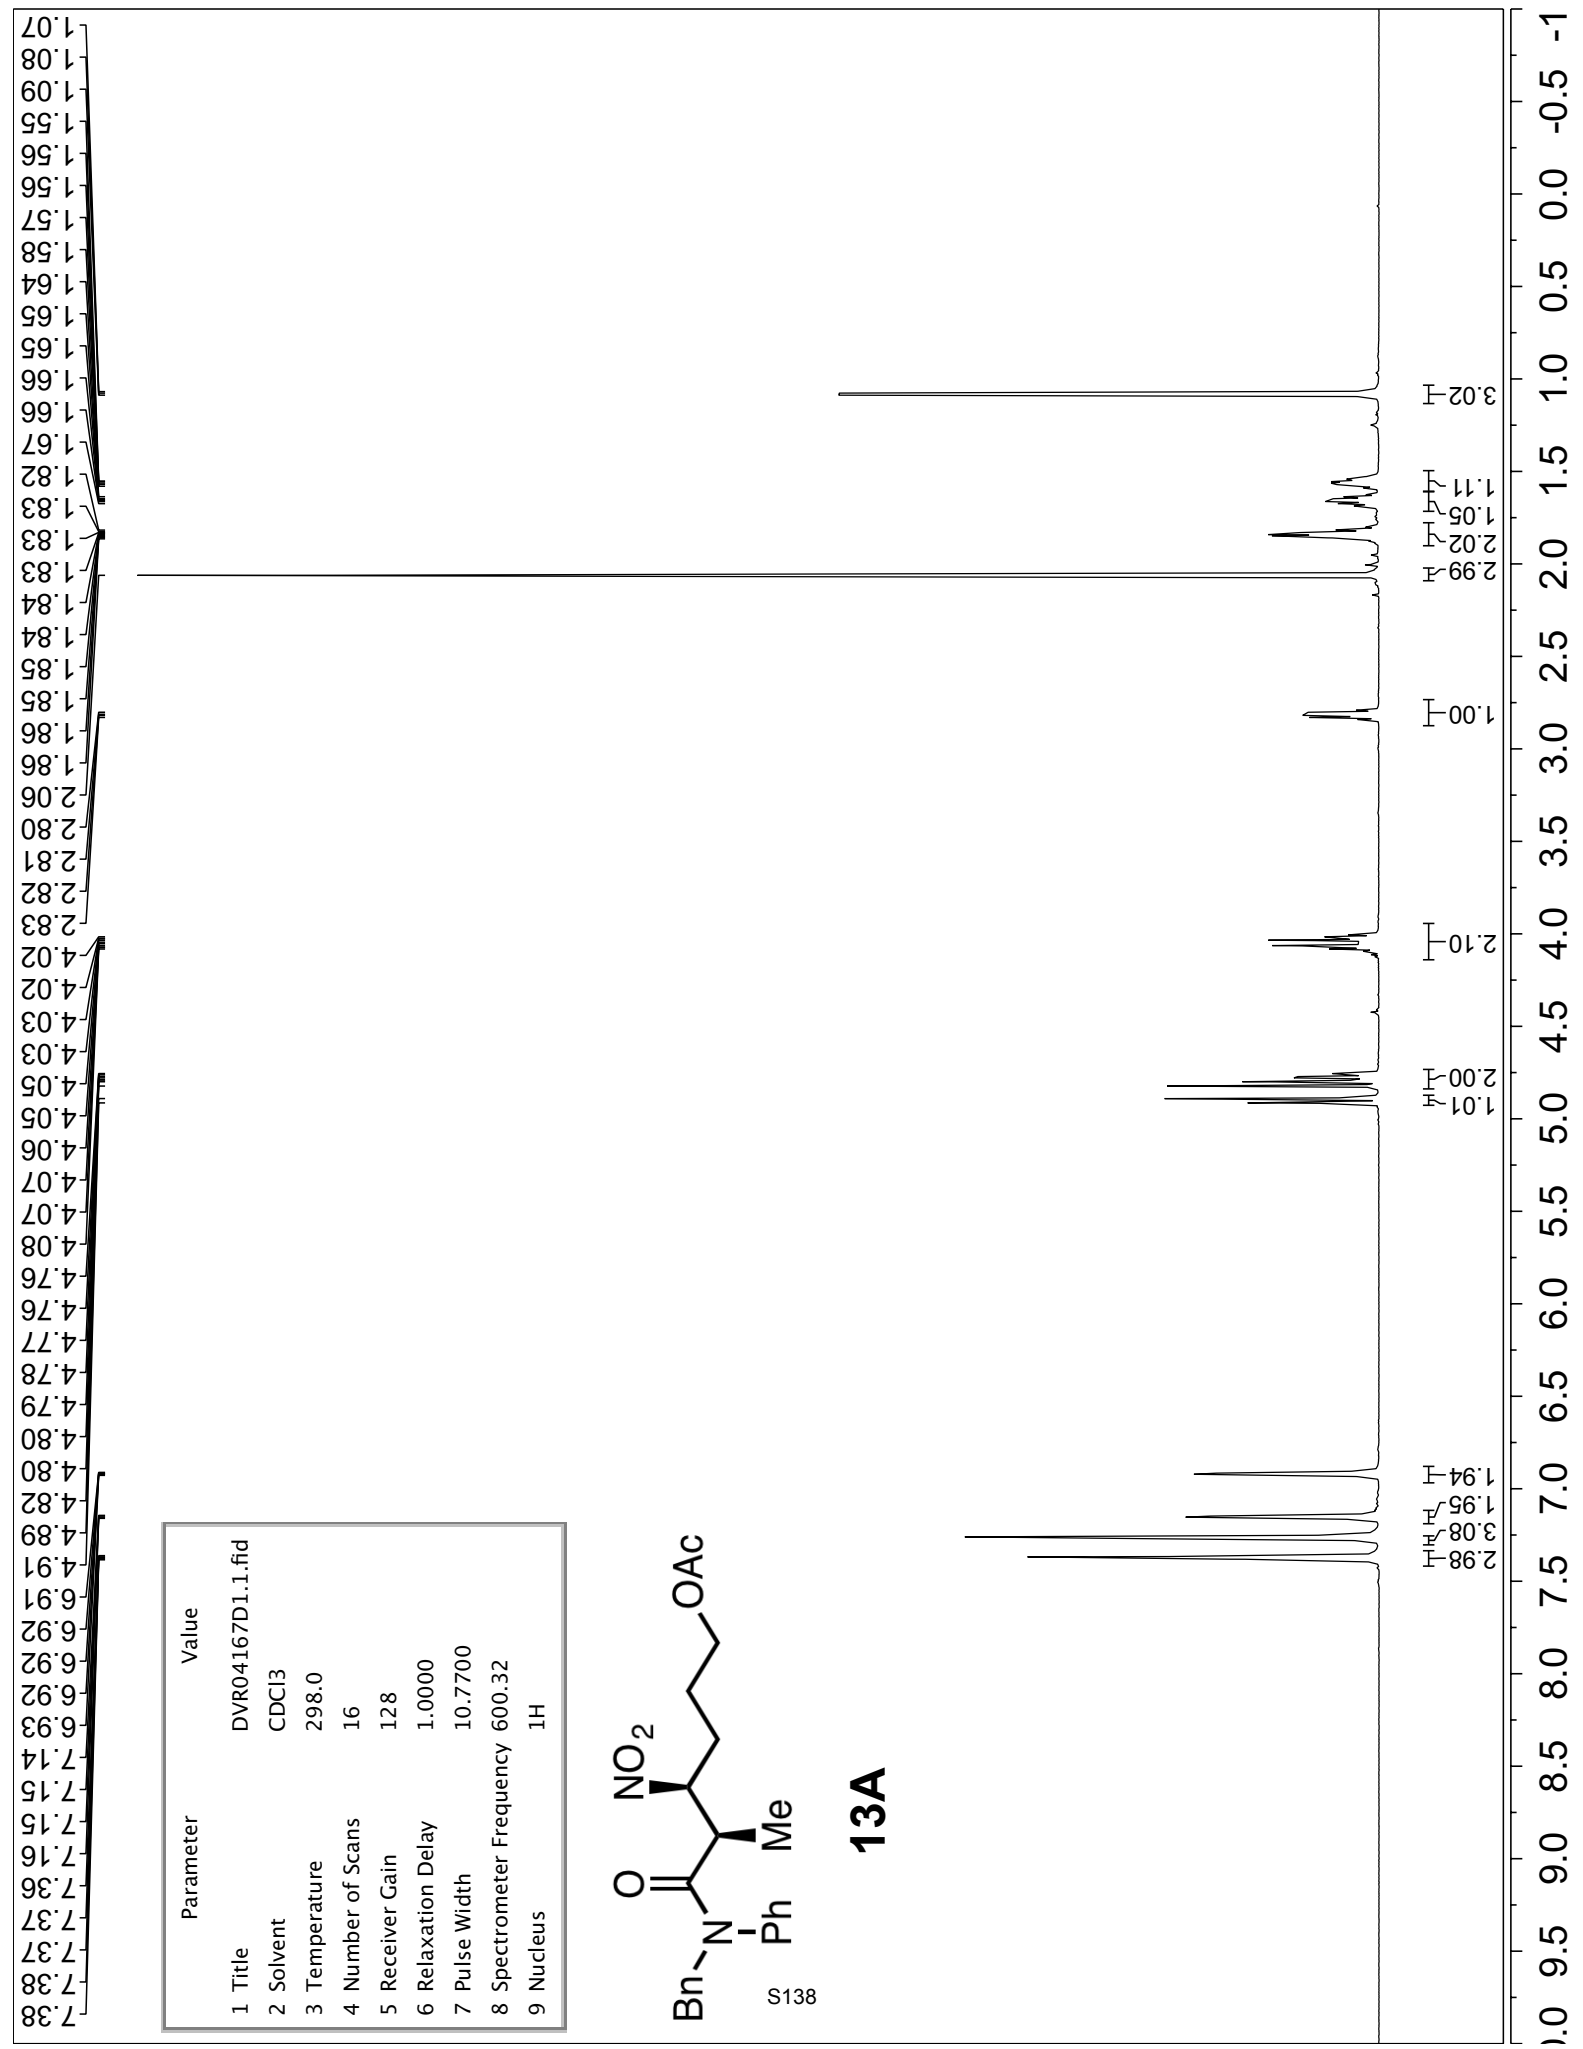



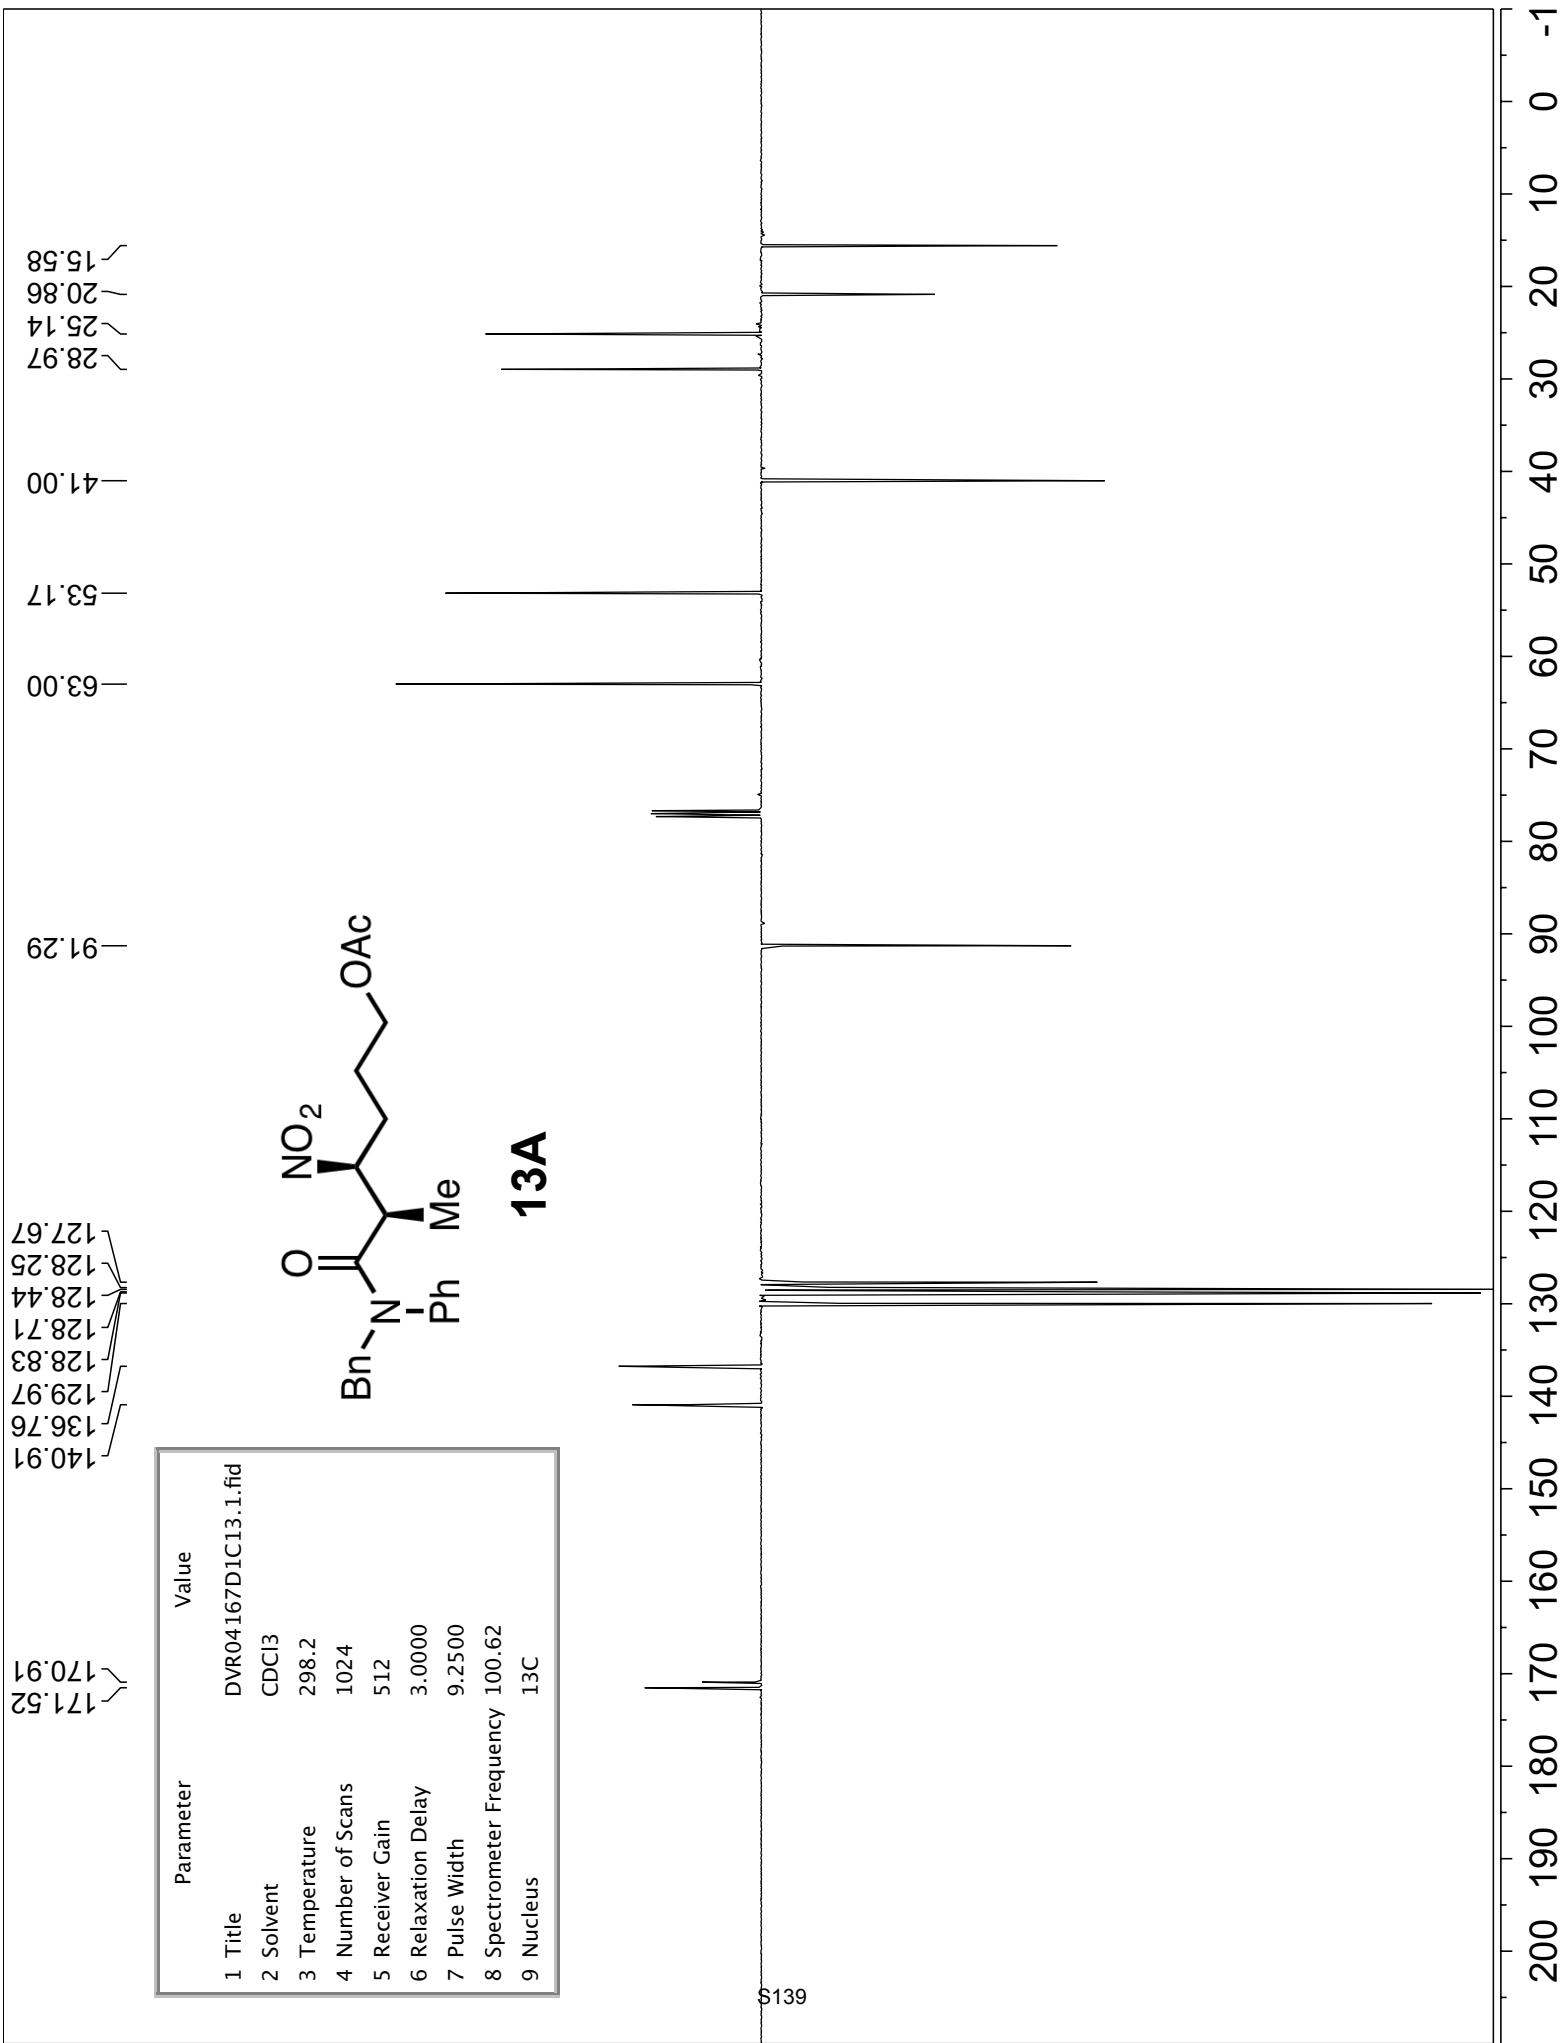

| Parameter                | Value            |
|--------------------------|------------------|
| 1 Title                  | DVR04167D2.1.fid |
| 2 Solvent                | CDCl3            |
| 3 Temperature            | 298.0            |
| 4 Number of Scans        | 16               |
| 5 Receiver Gain          | 203              |
| 6 Relaxation Delay       | 1.0000           |
| 7 Pulse Width            | 10.7700          |
| 8 Spectrometer Frequency | 600.32           |
| 9 Nucleus                | <sup>1</sup> H   |

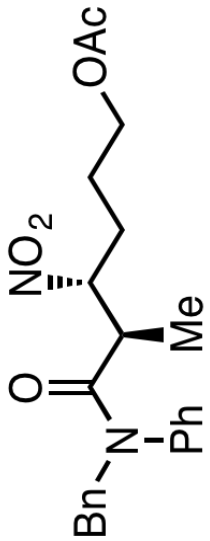

**13B**

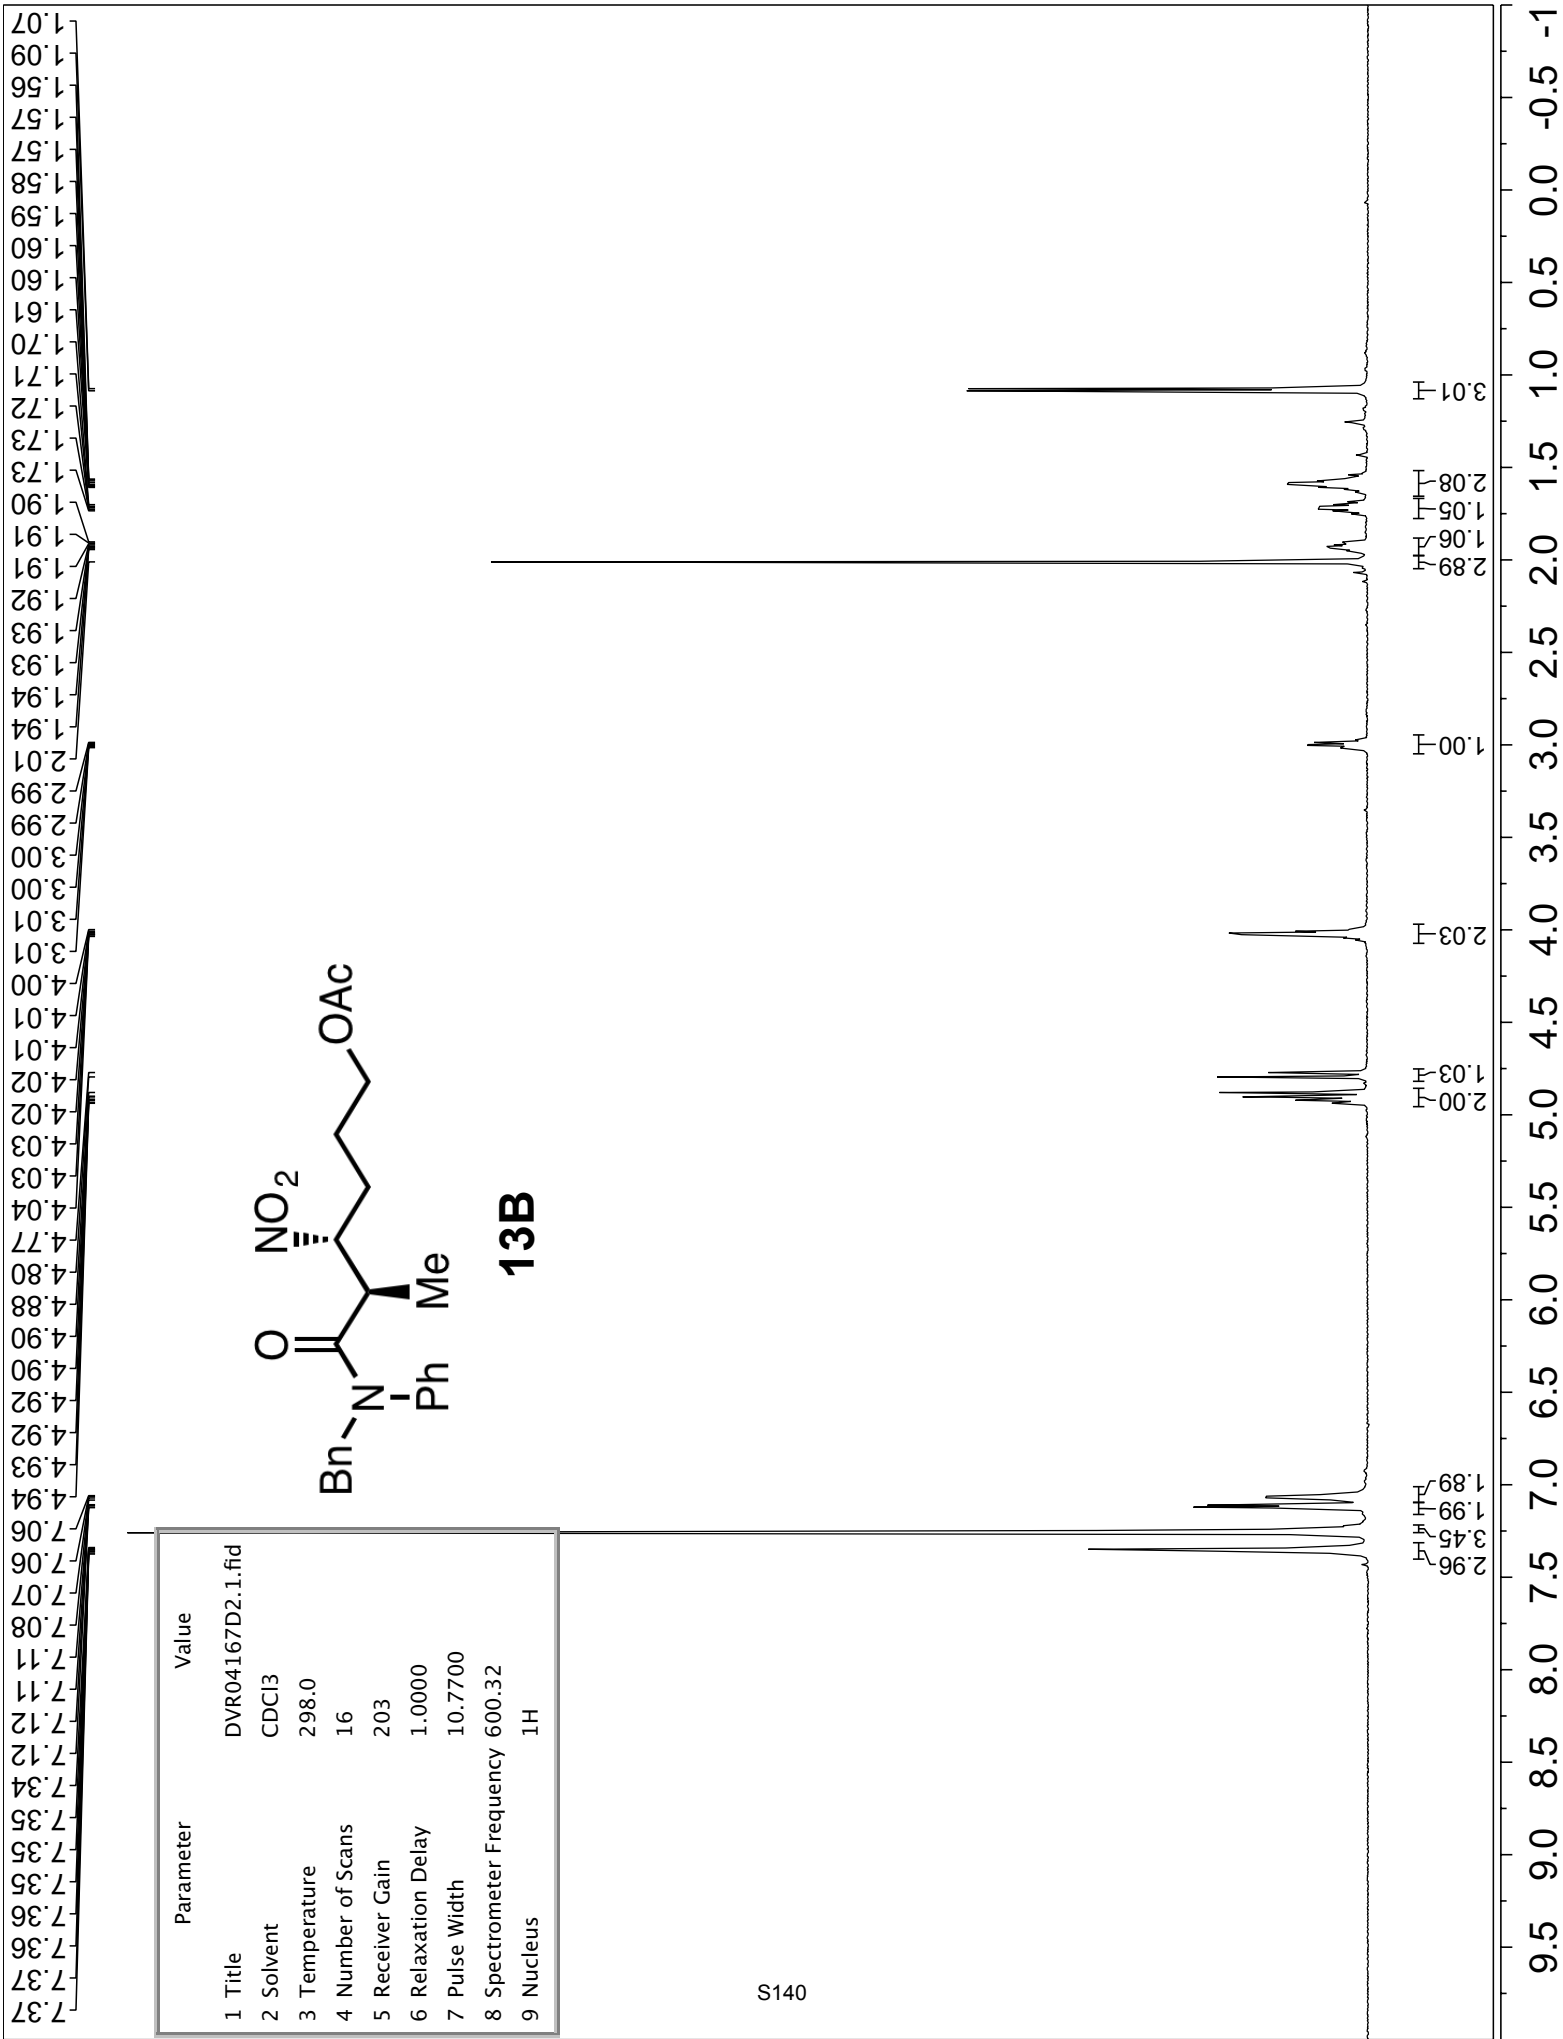

172.59  
170.89  
141.13  
136.87  
129.64  
128.65  
128.41  
128.39  
127.43

| Parameter                | Value               |
|--------------------------|---------------------|
| 1 Title                  | DVR04167D2C13.1.fid |
| 2 Solvent                | CDCl3               |
| 3 Temperature            | 298.2               |
| 4 Number of Scans        | 1024                |
| 5 Receiver Gain          | 512                 |
| 6 Relaxation Delay       | 3.0000              |
| 7 Pulse Width            | 9.2500              |
| 8 Spectrometer Frequency | 100.62              |
| 9 Nucleus                | 13C                 |

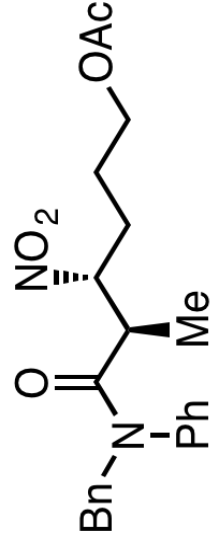

**13B**

88.91  
63.05  
53.12  
39.72  
27.36  
24.41  
20.84  
14.50

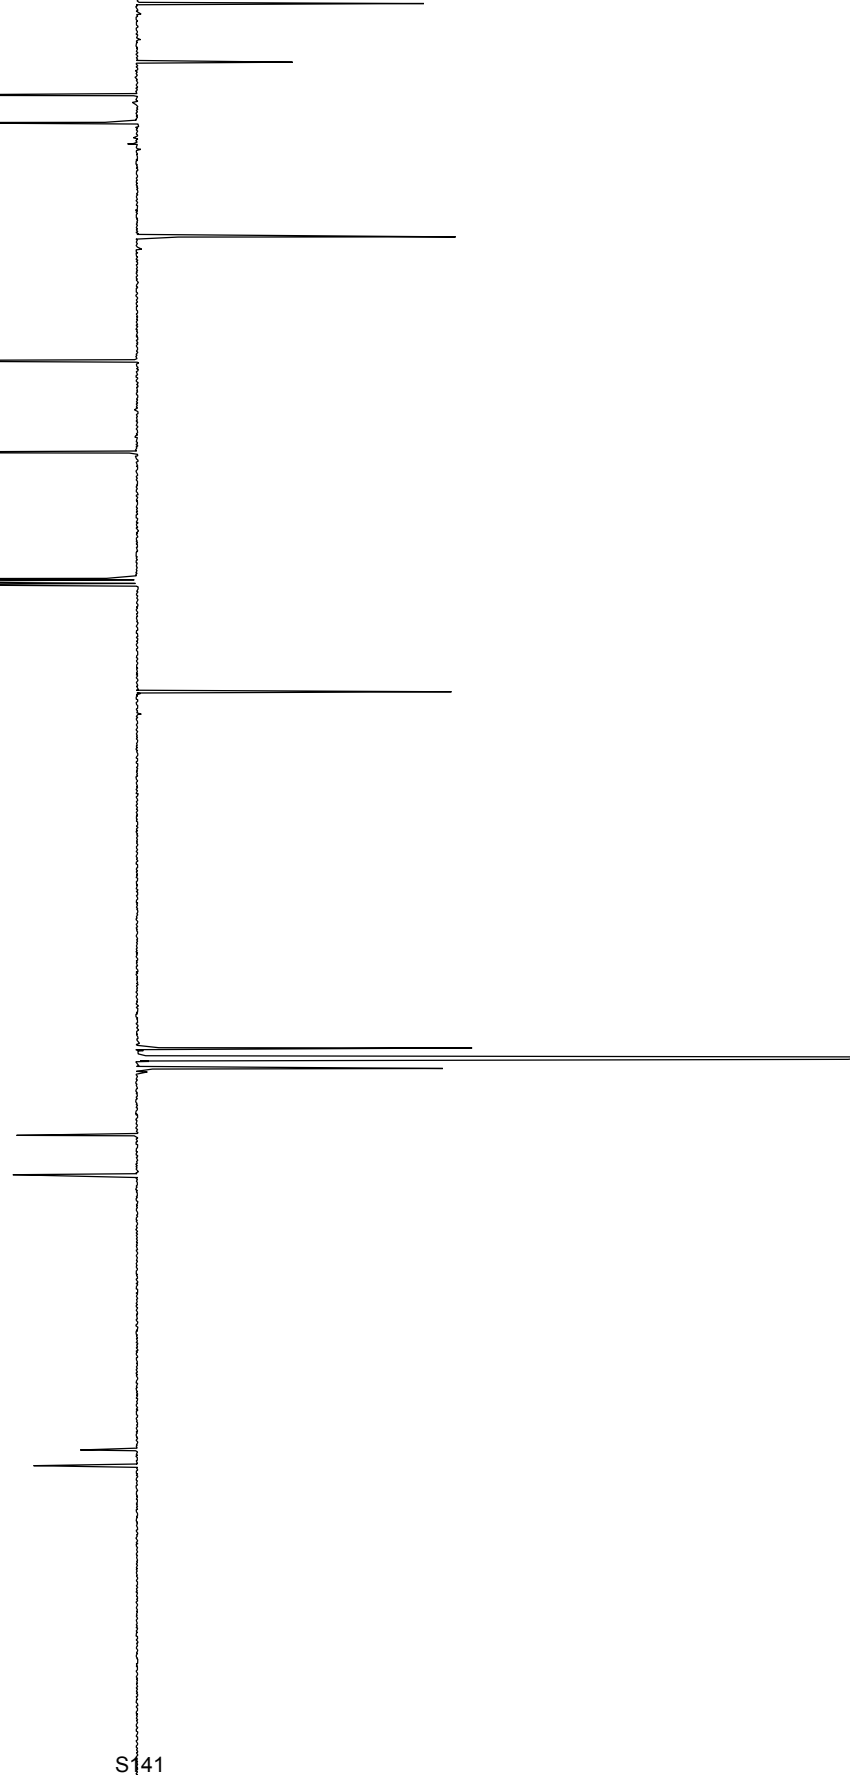

| Parameter                | Value              |
|--------------------------|--------------------|
| 1 Title                  | DVR04186BCRD.1.fid |
| 2 Solvent                | CDCI3              |
| 3 Temperature            | 298.2              |
| 4 Number of Scans        | 64                 |
| 5 Receiver Gain          | 8                  |
| 6 Relaxation Delay       | 6.0000             |
| 7 Pulse Width            | 15.0000            |
| 8 Spectrometer Frequency | 400.13             |
| 9 Nucleus                | <sup>1</sup> H     |

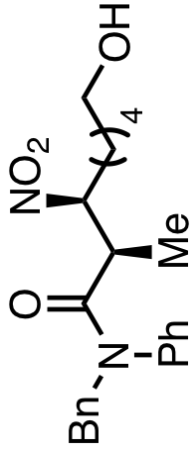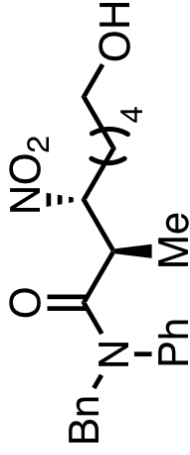

**Crude**  
**72:28**

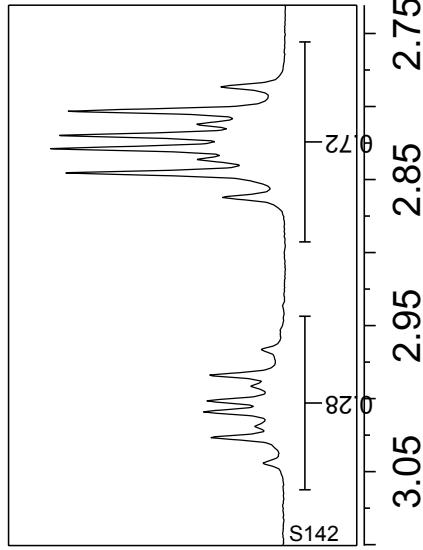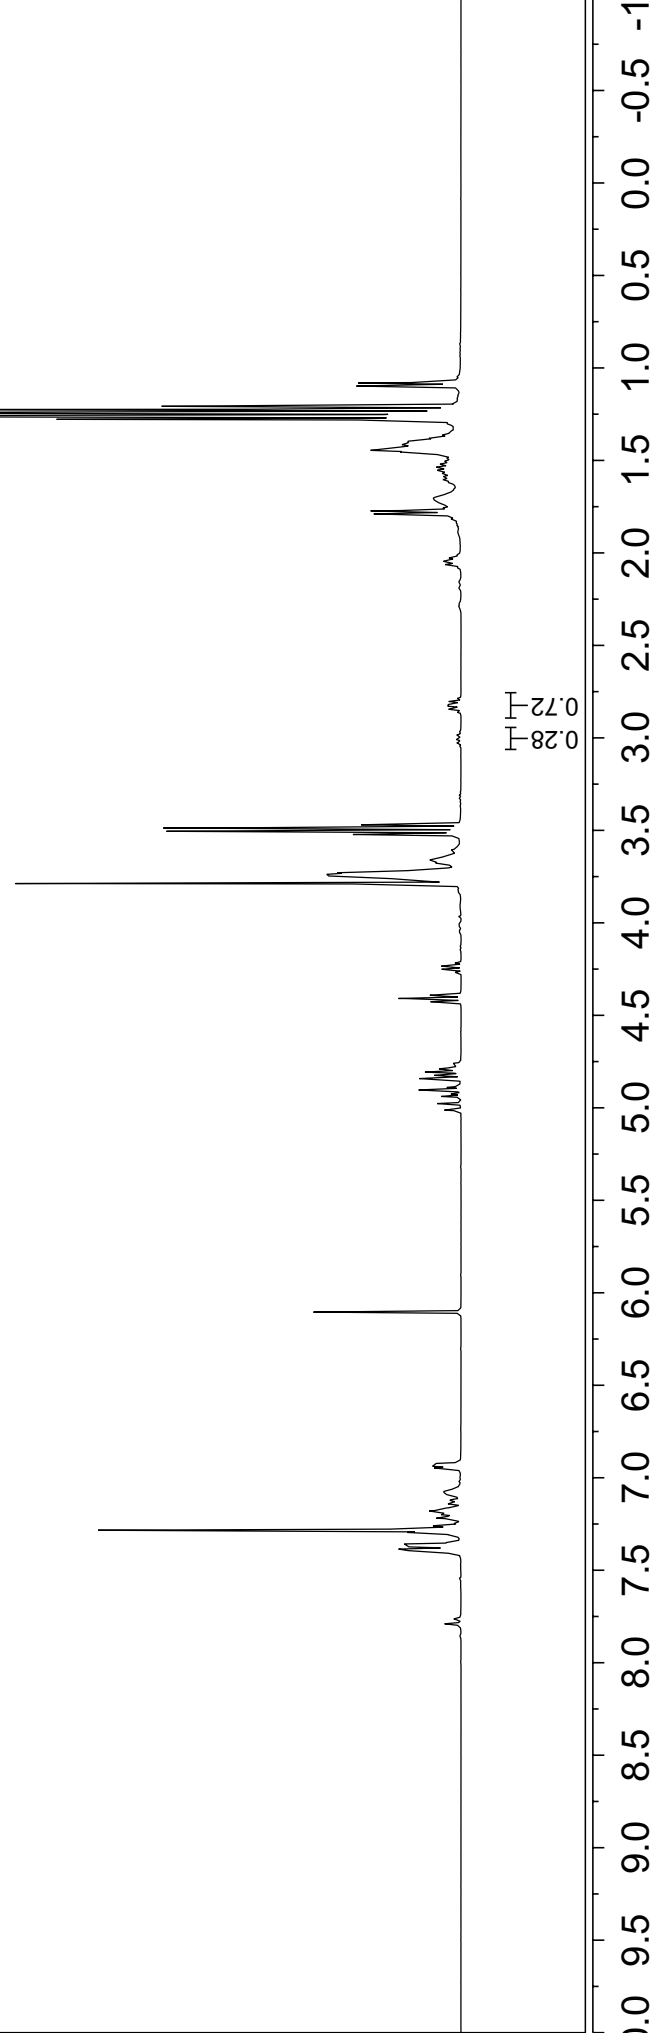

7.39  
7.38  
7.38  
7.37  
7.29  
7.28  
7.28  
7.27  
7.27  
7.26  
7.17  
7.17  
7.16  
7.16  
7.16  
6.93  
6.92  
6.92  
6.92  
6.91  
4.92  
4.90  
4.82  
4.80  
4.79  
4.78  
4.77  
3.65  
3.64  
3.63  
3.62  
2.82  
2.81  
2.80  
1.78  
1.78  
1.77  
1.77  
1.76  
1.76  
1.75  
1.55  
1.54  
1.54  
1.53  
1.53  
1.53  
1.38  
1.37  
1.37  
1.36  
1.36  
1.35  
1.26  
1.25  
1.24  
1.08  
1.07

| Parameter                | Value              |
|--------------------------|--------------------|
| 1 Title                  | DVR04186E1-A.1.fid |
| 2 Solvent                | CDCl3              |
| 3 Temperature            | 297.1              |
| 4 Number of Scans        | 16                 |
| 5 Receiver Gain          | 161                |
| 6 Relaxation Delay       | 1.0000             |
| 7 Pulse Width            | 10.7300            |
| 8 Spectrometer Frequency | 600.32             |
| 9 Nucleus                | <sup>1</sup> H     |

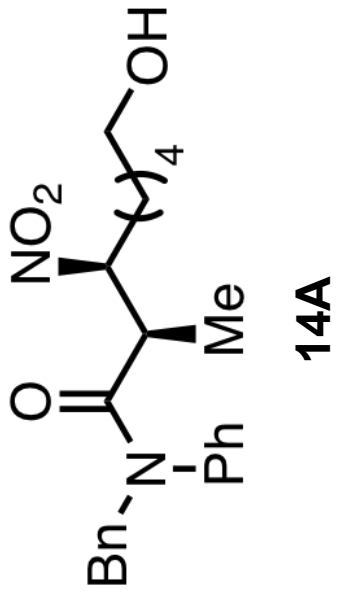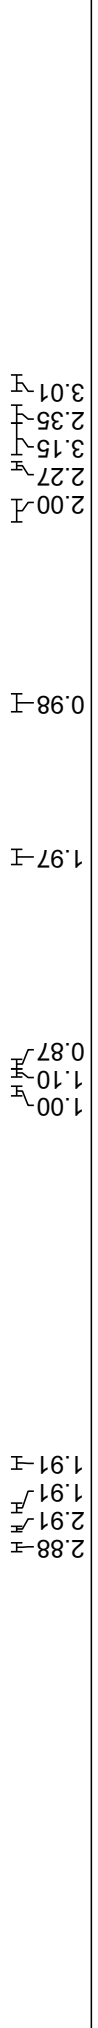

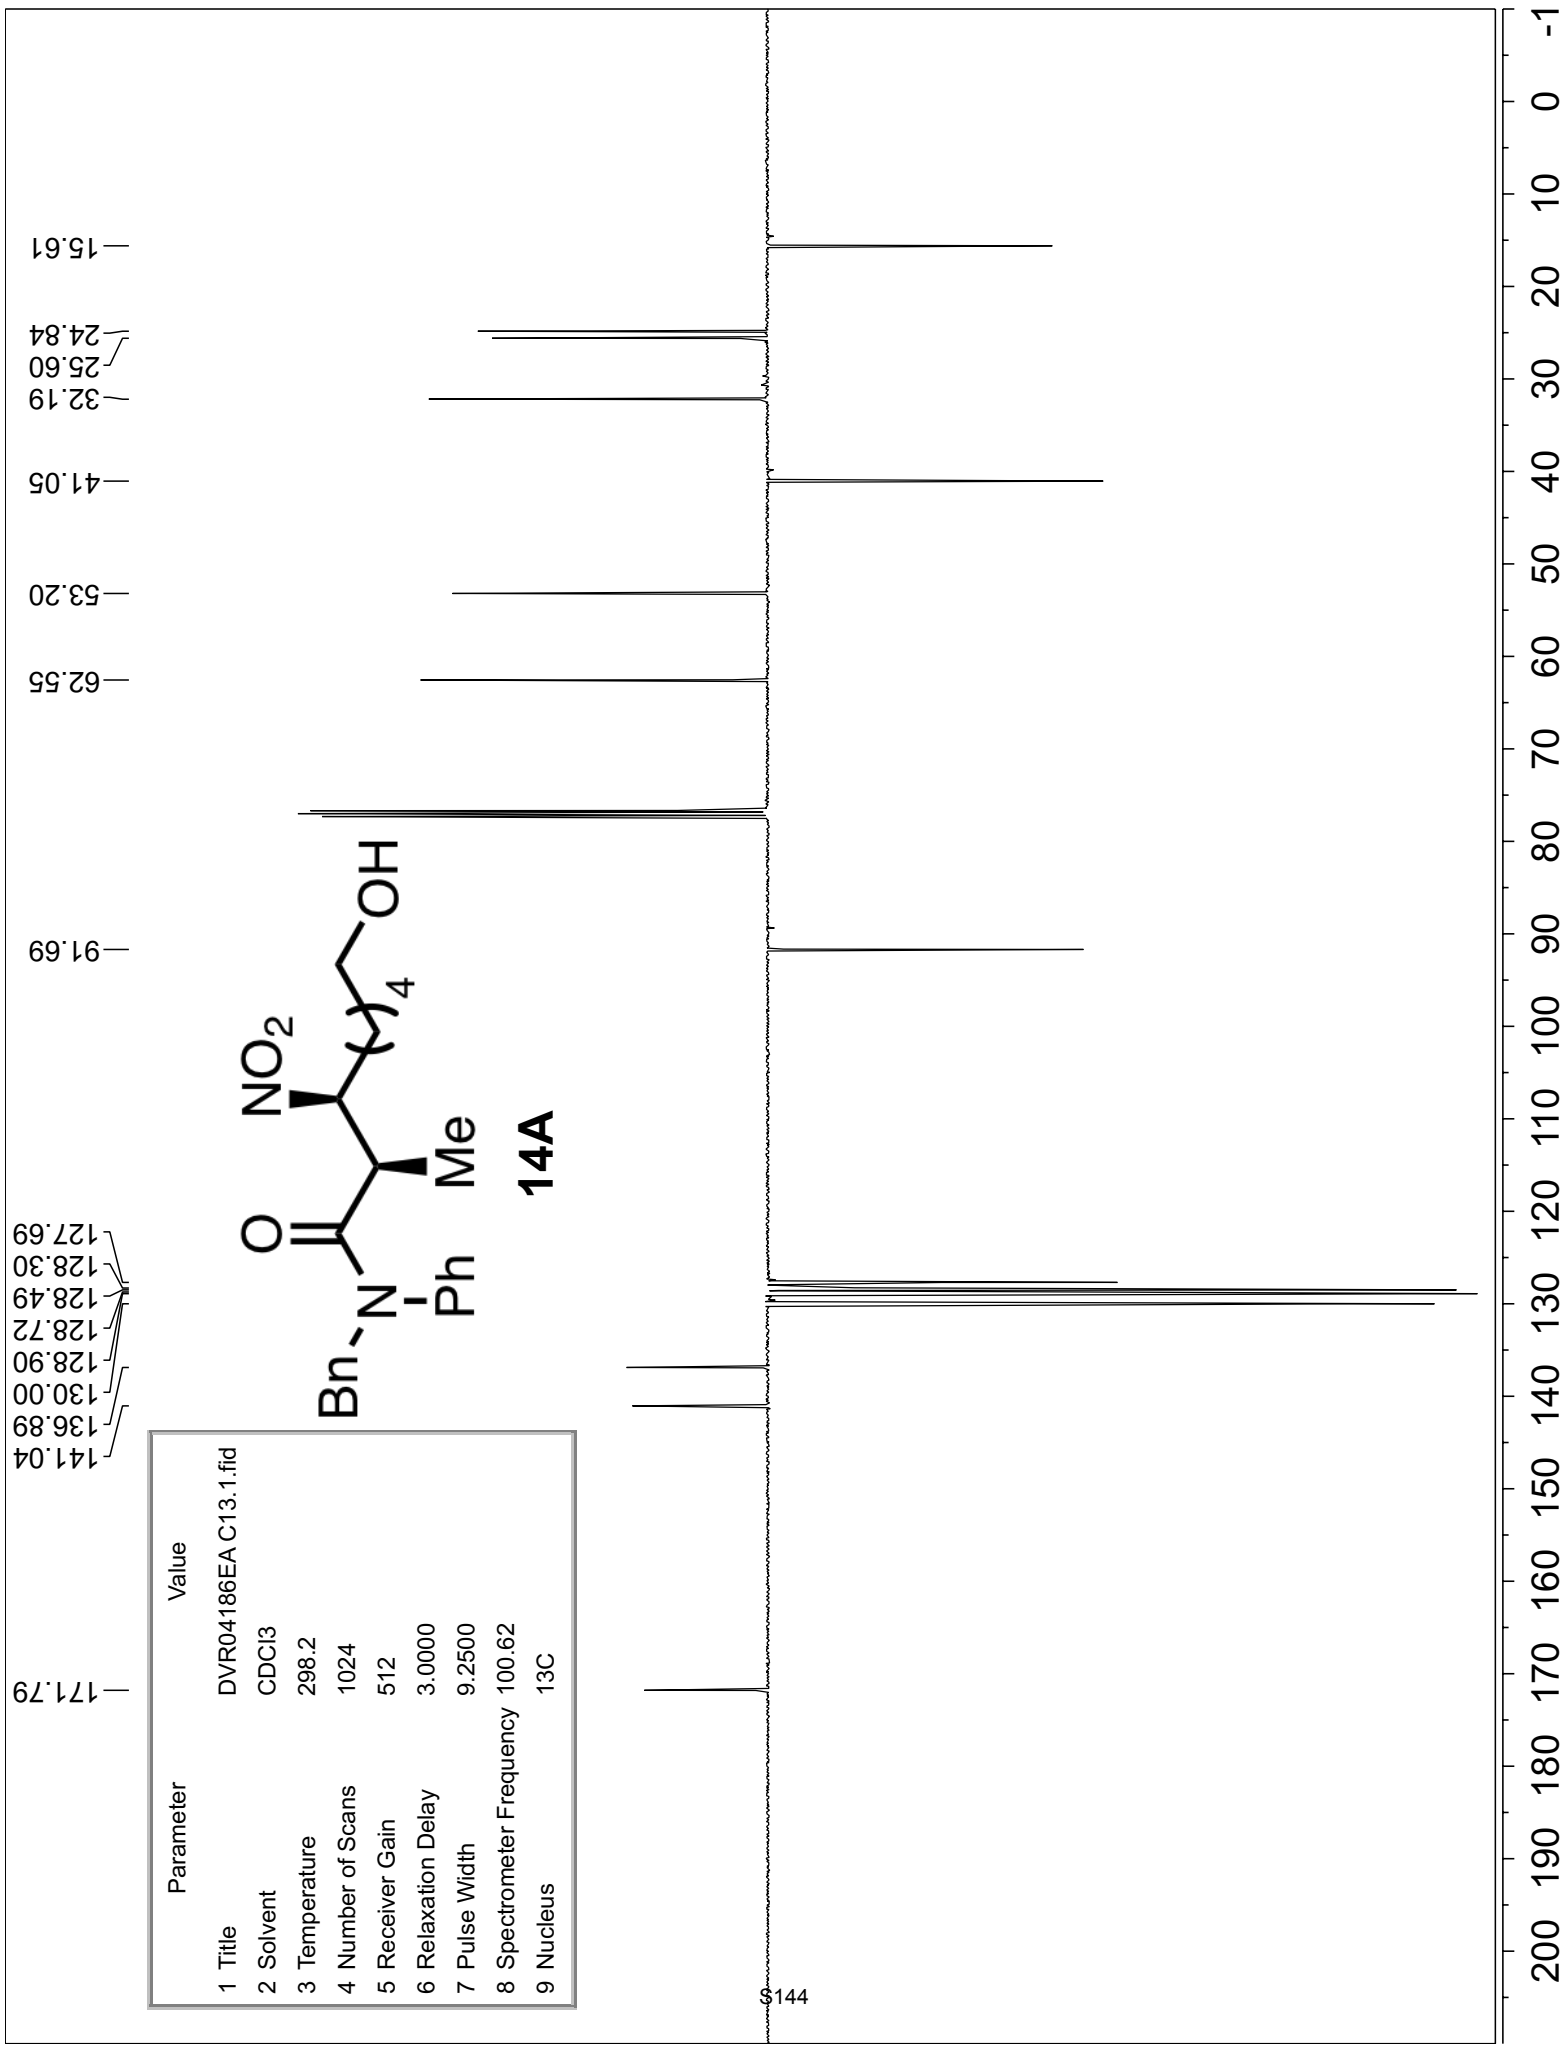

| Parameter                | Value                |
|--------------------------|----------------------|
| 1 Title                  | DVR04186EA C13.1.fid |
| 2 Solvent                | CDCl3                |
| 3 Temperature            | 298.2                |
| 4 Number of Scans        | 1024                 |
| 5 Receiver Gain          | 512                  |
| 6 Relaxation Delay       | 3.0000               |
| 7 Pulse Width            | 9.2500               |
| 8 Spectrometer Frequency | 100.62               |
| 9 Nucleus                | 13C                  |

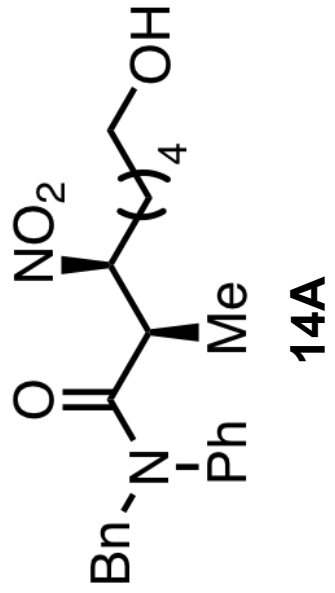

7.28  
7.27  
7.27  
7.26  
7.26  
7.26  
7.25  
7.19  
7.18  
7.18  
7.17  
7.17  
7.16  
7.16  
7.15  
7.15  
7.15  
7.04  
7.04  
7.03  
7.03  
6.99  
6.98  
4.82  
4.81  
4.80  
4.79  
4.79  
4.71  
4.69  
3.52  
3.51  
3.50  
2.92  
2.91  
2.89  
1.58  
1.57  
1.44  
1.43  
1.43  
1.42  
1.42  
1.41  
1.40  
1.30  
1.29  
1.29  
1.22  
1.21  
1.21  
1.20  
1.19  
1.19  
1.18  
1.18  
1.17  
1.16  
1.15  
0.98  
0.98

| Parameter                | Value            |
|--------------------------|------------------|
| 1 Title                  | DVR04186G1.2.fid |
| 2 Solvent                | CDCl3            |
| 3 Temperature            | 298.5            |
| 4 Number of Scans        | 16               |
| 5 Receiver Gain          | 114              |
| 6 Relaxation Delay       | 1.0000           |
| 7 Pulse Width            | 10.7300          |
| 8 Spectrometer Frequency | 600.32           |
| 9 Nucleus                | <sup>1</sup> H   |

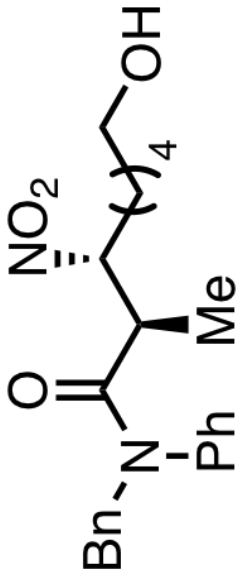

**14B**

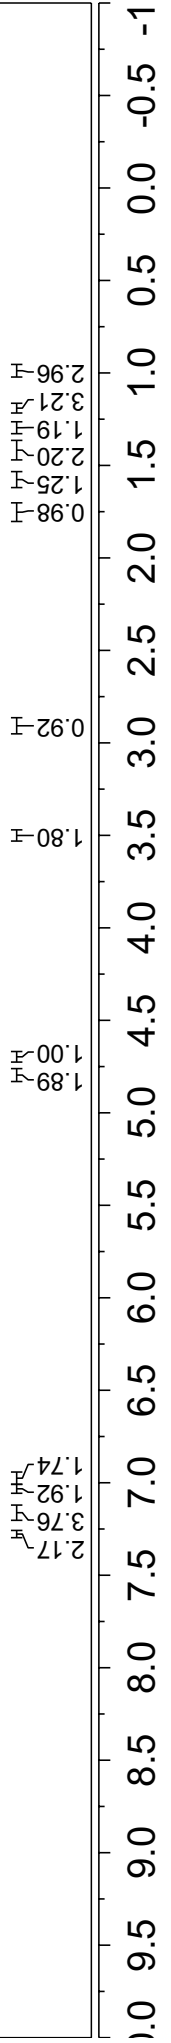

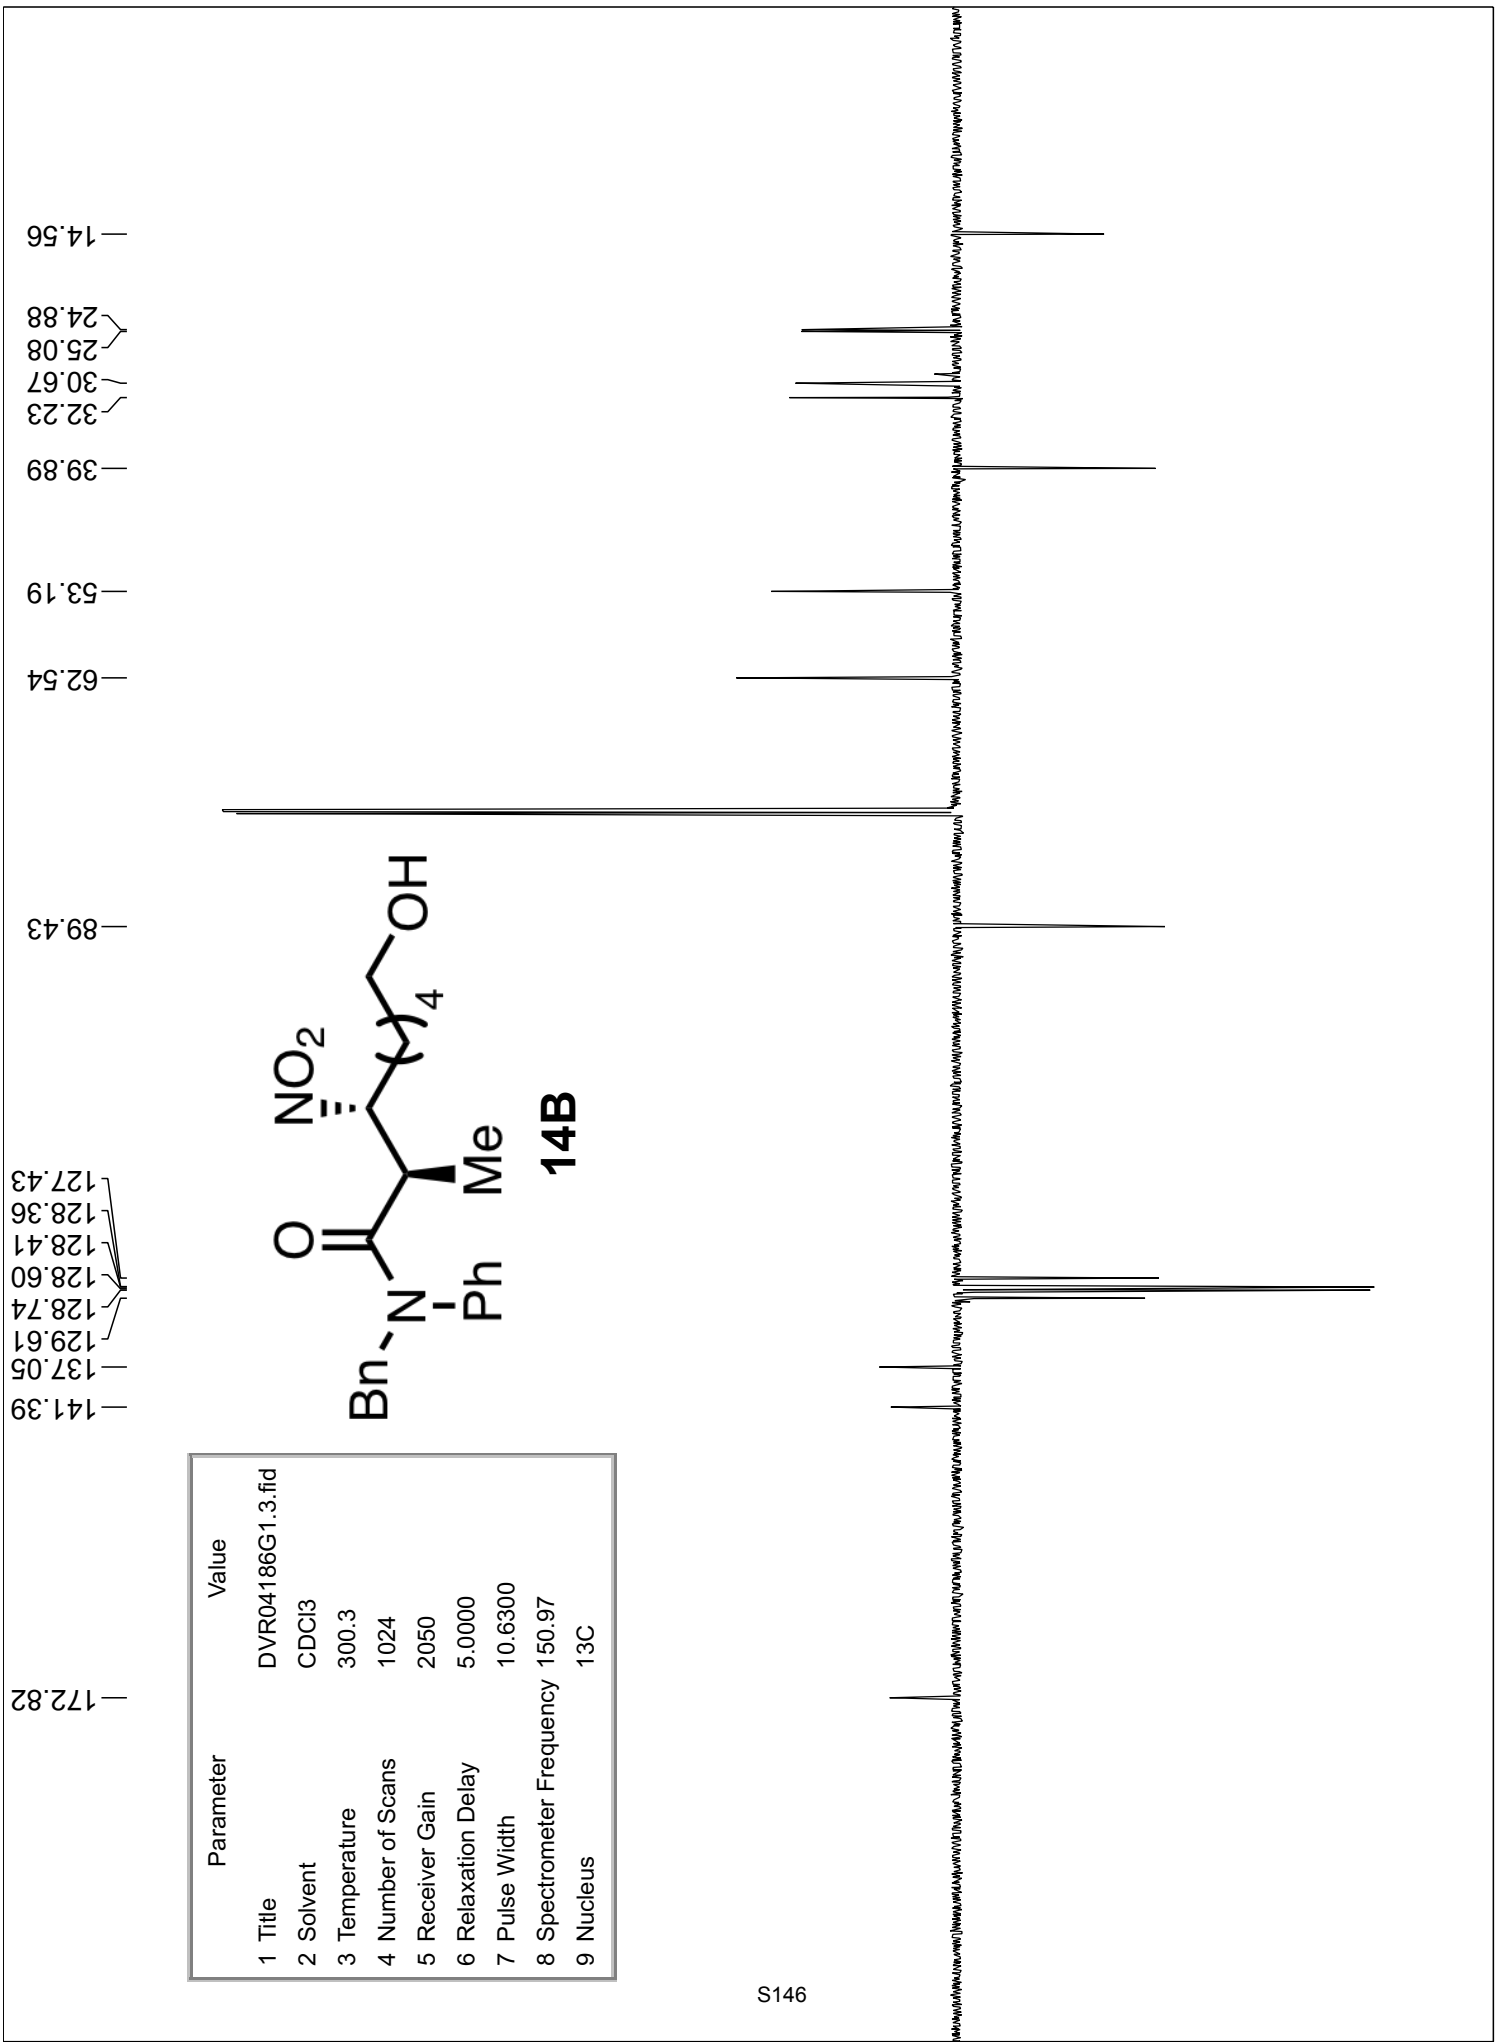



Parameter Value

1 Title DVR04156CRD.1.fid  
2 Solvent CDCl3  
3 Temperature 297.6  
4 Number of Scans 16  
5 Receiver Gain 114  
6 Relaxation Delay 1.0000  
7 Pulse Width 10.7700  
8 Spectrometer Frequency 600.32  
9 Nucleus 1H

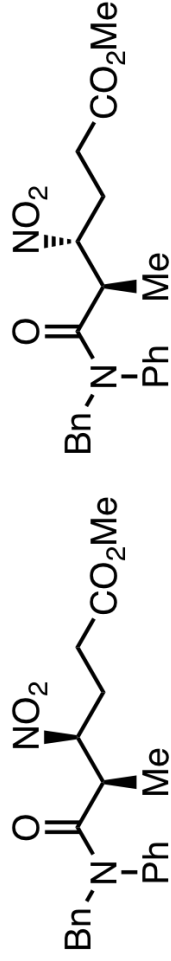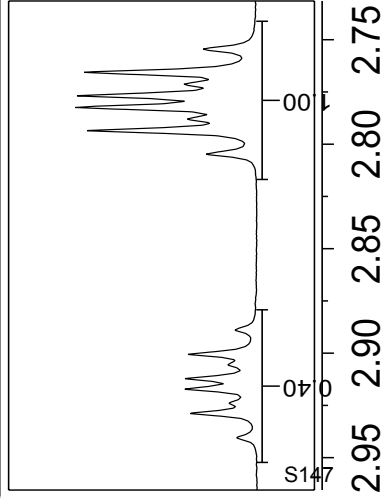

2.95 2.90 2.85 2.80 2.75

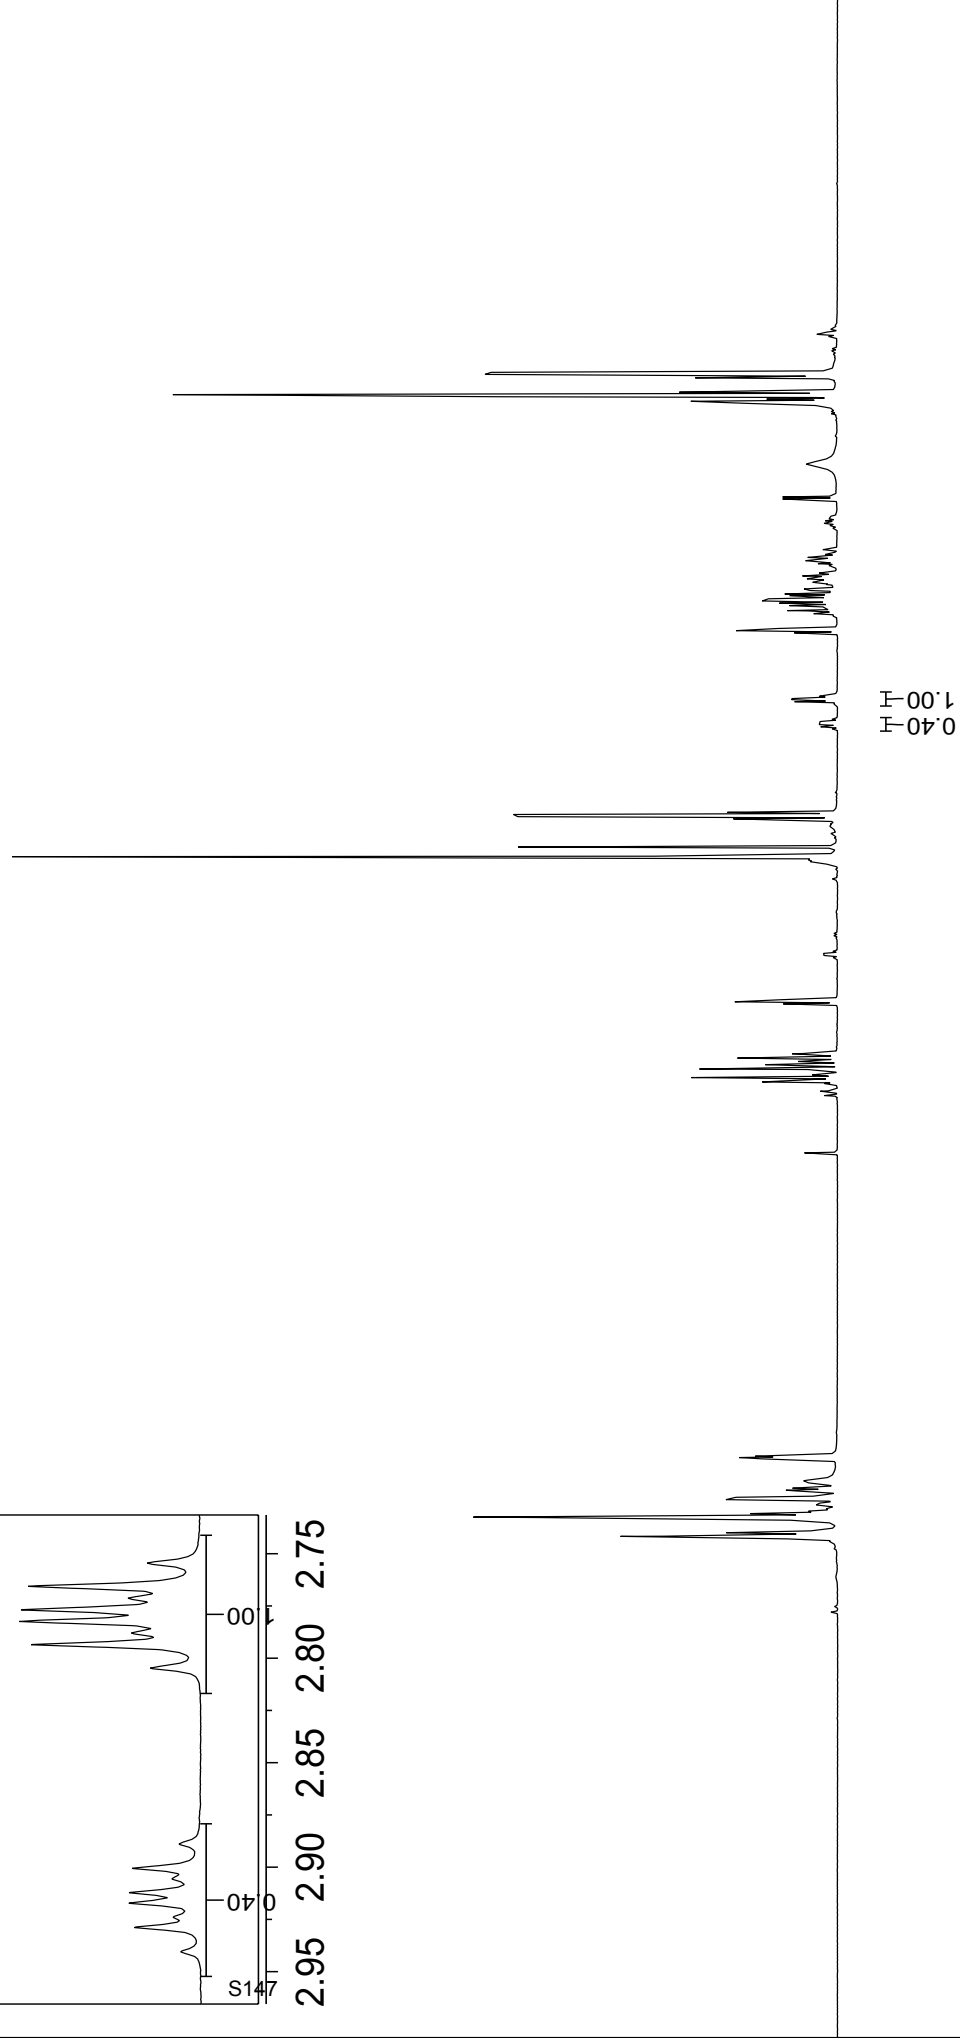

1.00 H  
0.40 H

10.0 9.5 9.0 8.5 8.0 7.5 7.0 6.5 6.0 5.5 5.0 4.5 4.0 3.5 3.0 2.5 2.0 1.5 1.0 0.5 0.0 -0.5 -1.0

| Parameter                | Value            |
|--------------------------|------------------|
| 1 Title                  | DVR04156D1.2.fid |
| 2 Solvent                | CDCl3            |
| 3 Temperature            | 298.0            |
| 4 Number of Scans        | 16               |
| 5 Receiver Gain          | 181              |
| 6 Relaxation Delay       | 1.0000           |
| 7 Pulse Width            | 10.7700          |
| 8 Spectrometer Frequency | 600.32           |
| 9 Nucleus                | 1H               |

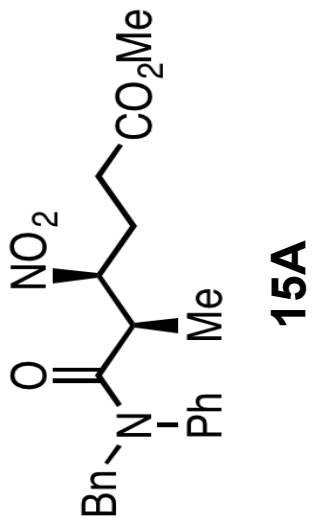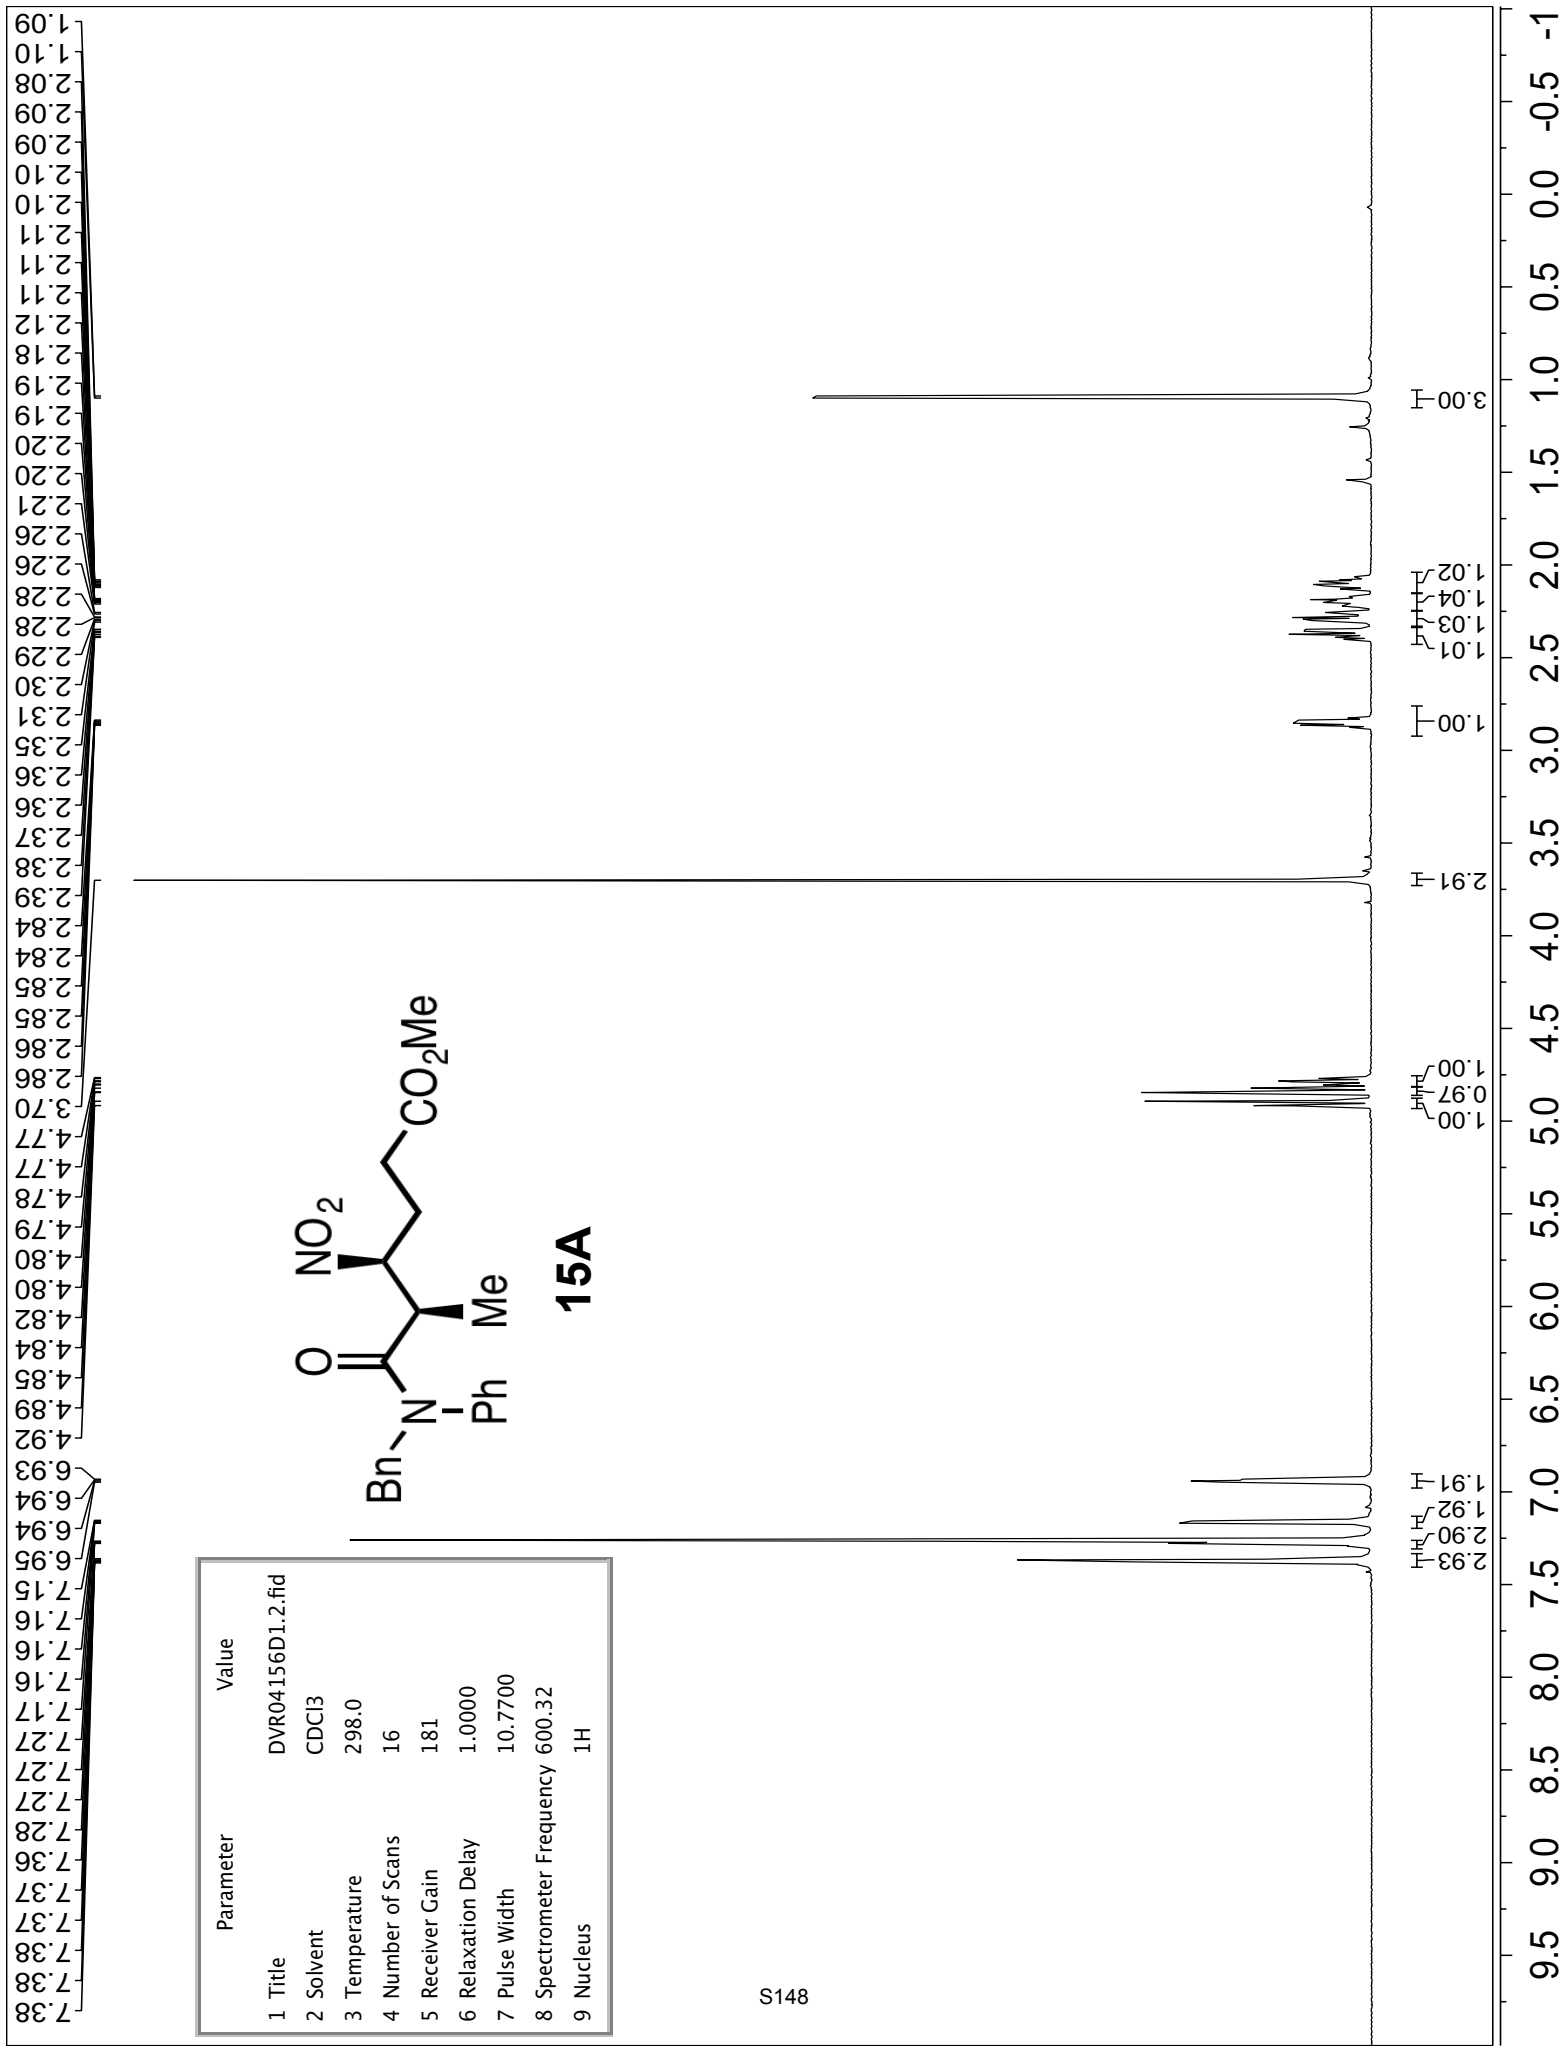

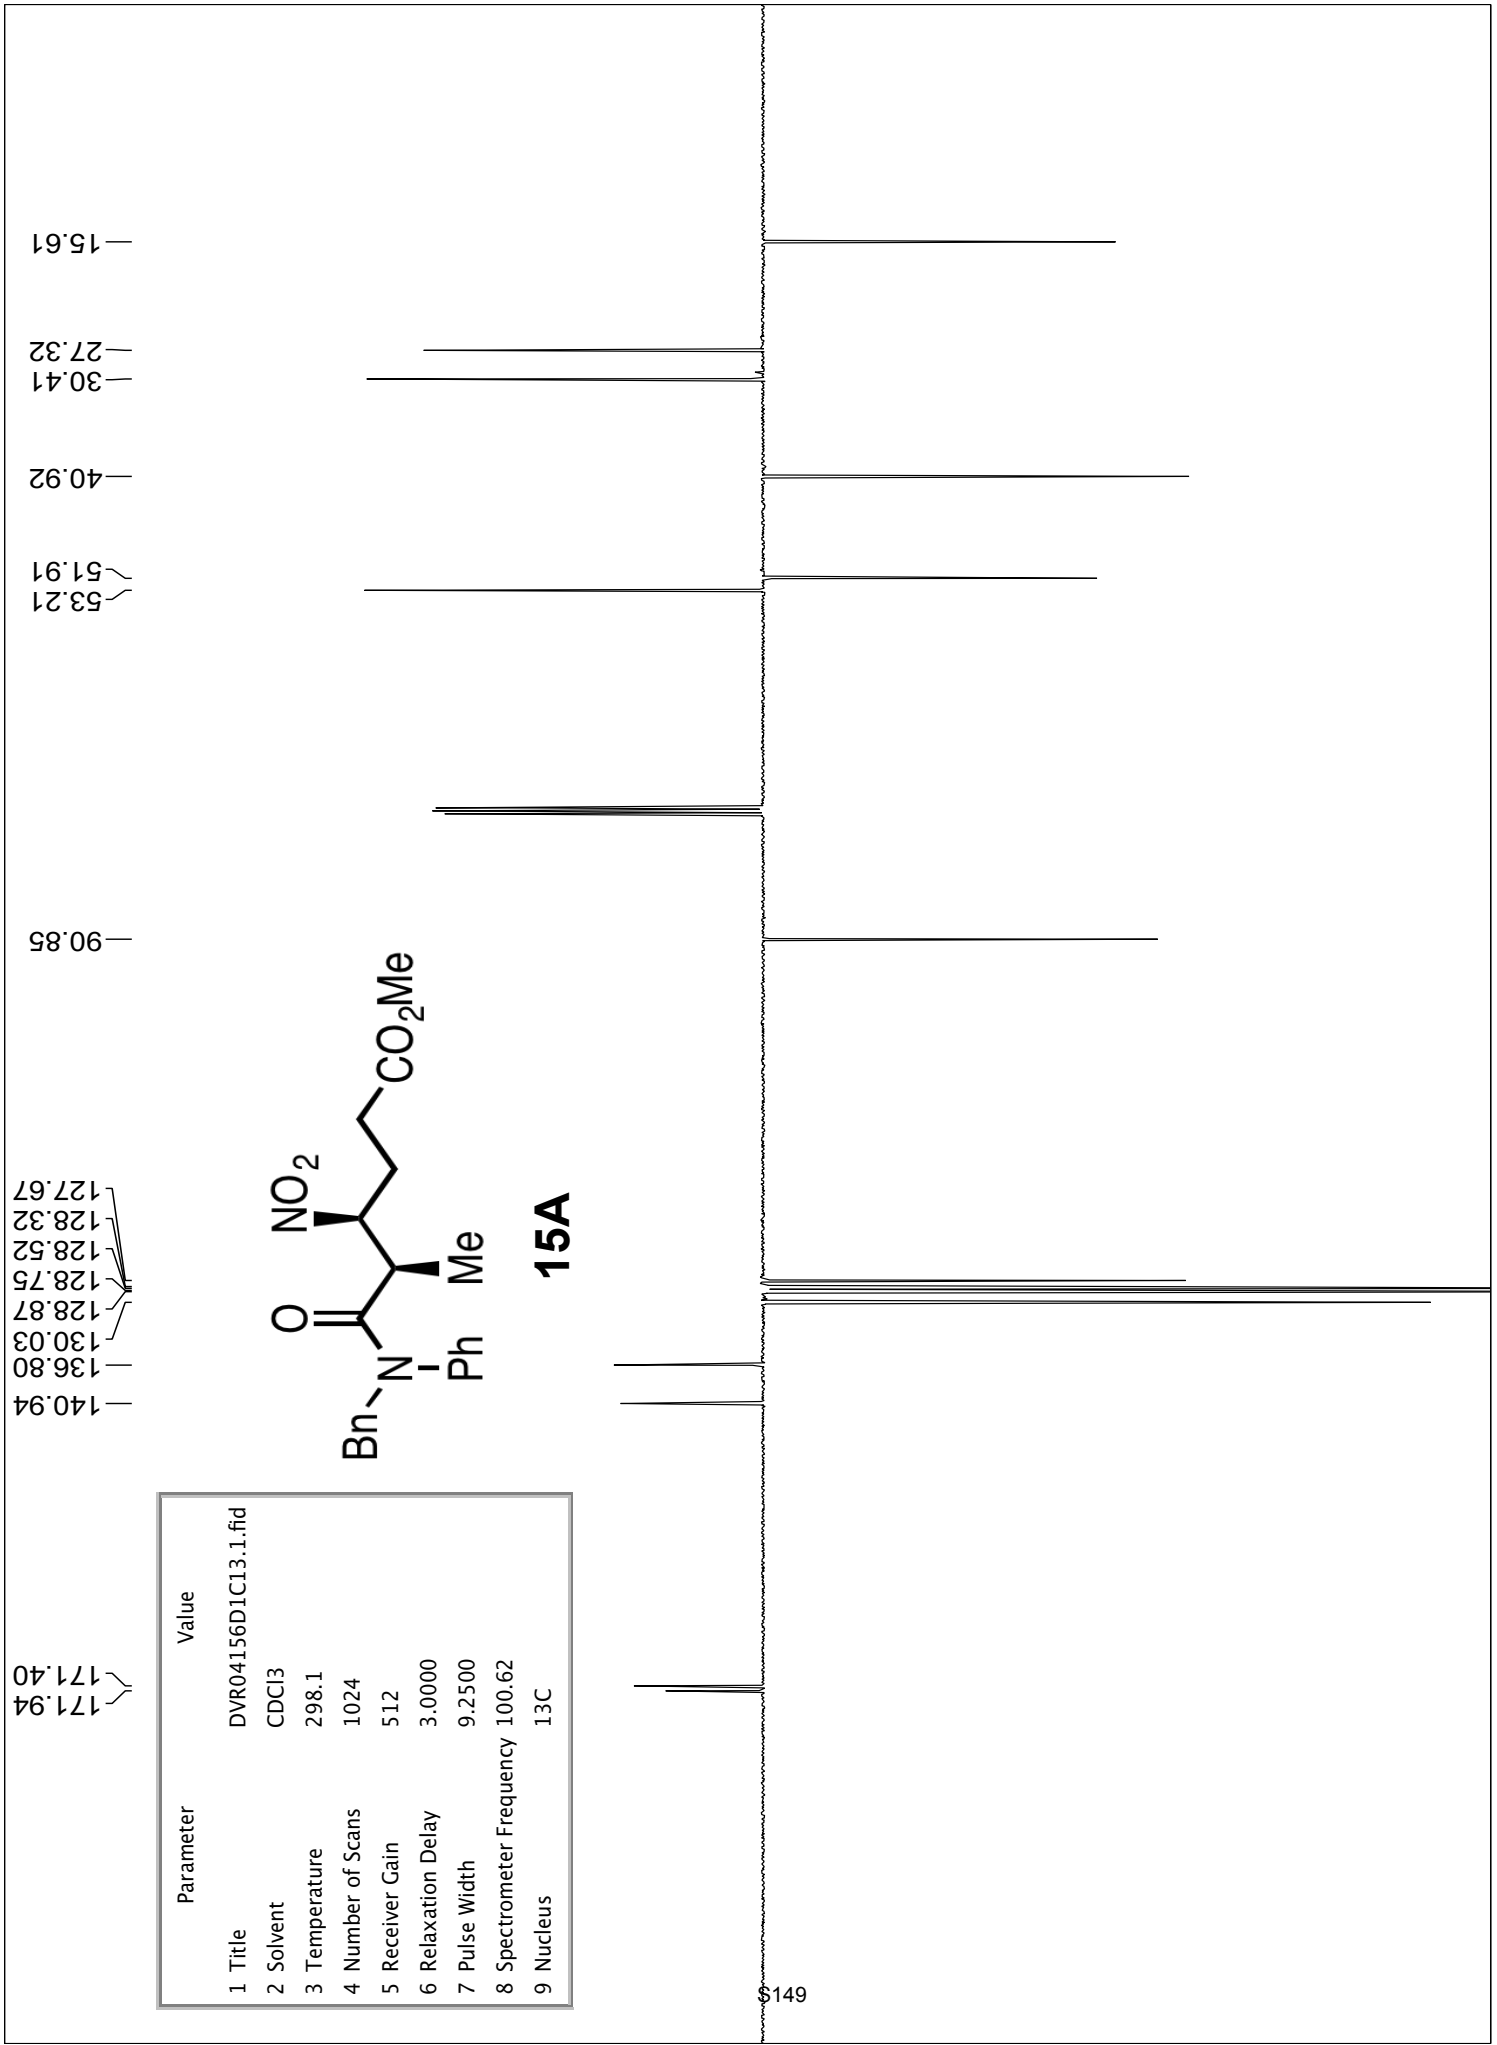

| Parameter                | Value            |
|--------------------------|------------------|
| 1 Title                  | DVR04156D2.1.fid |
| 2 Solvent                | CDCl3            |
| 3 Temperature            | 298.2            |
| 4 Number of Scans        | 16               |
| 5 Receiver Gain          | 13               |
| 6 Relaxation Delay       | 1.0000           |
| 7 Pulse Width            | 15.0000          |
| 8 Spectrometer Frequency | 400.13           |
| 9 Nucleus                | 1H               |

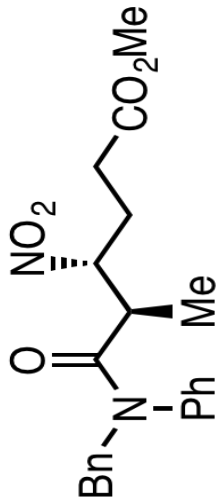

**15B**

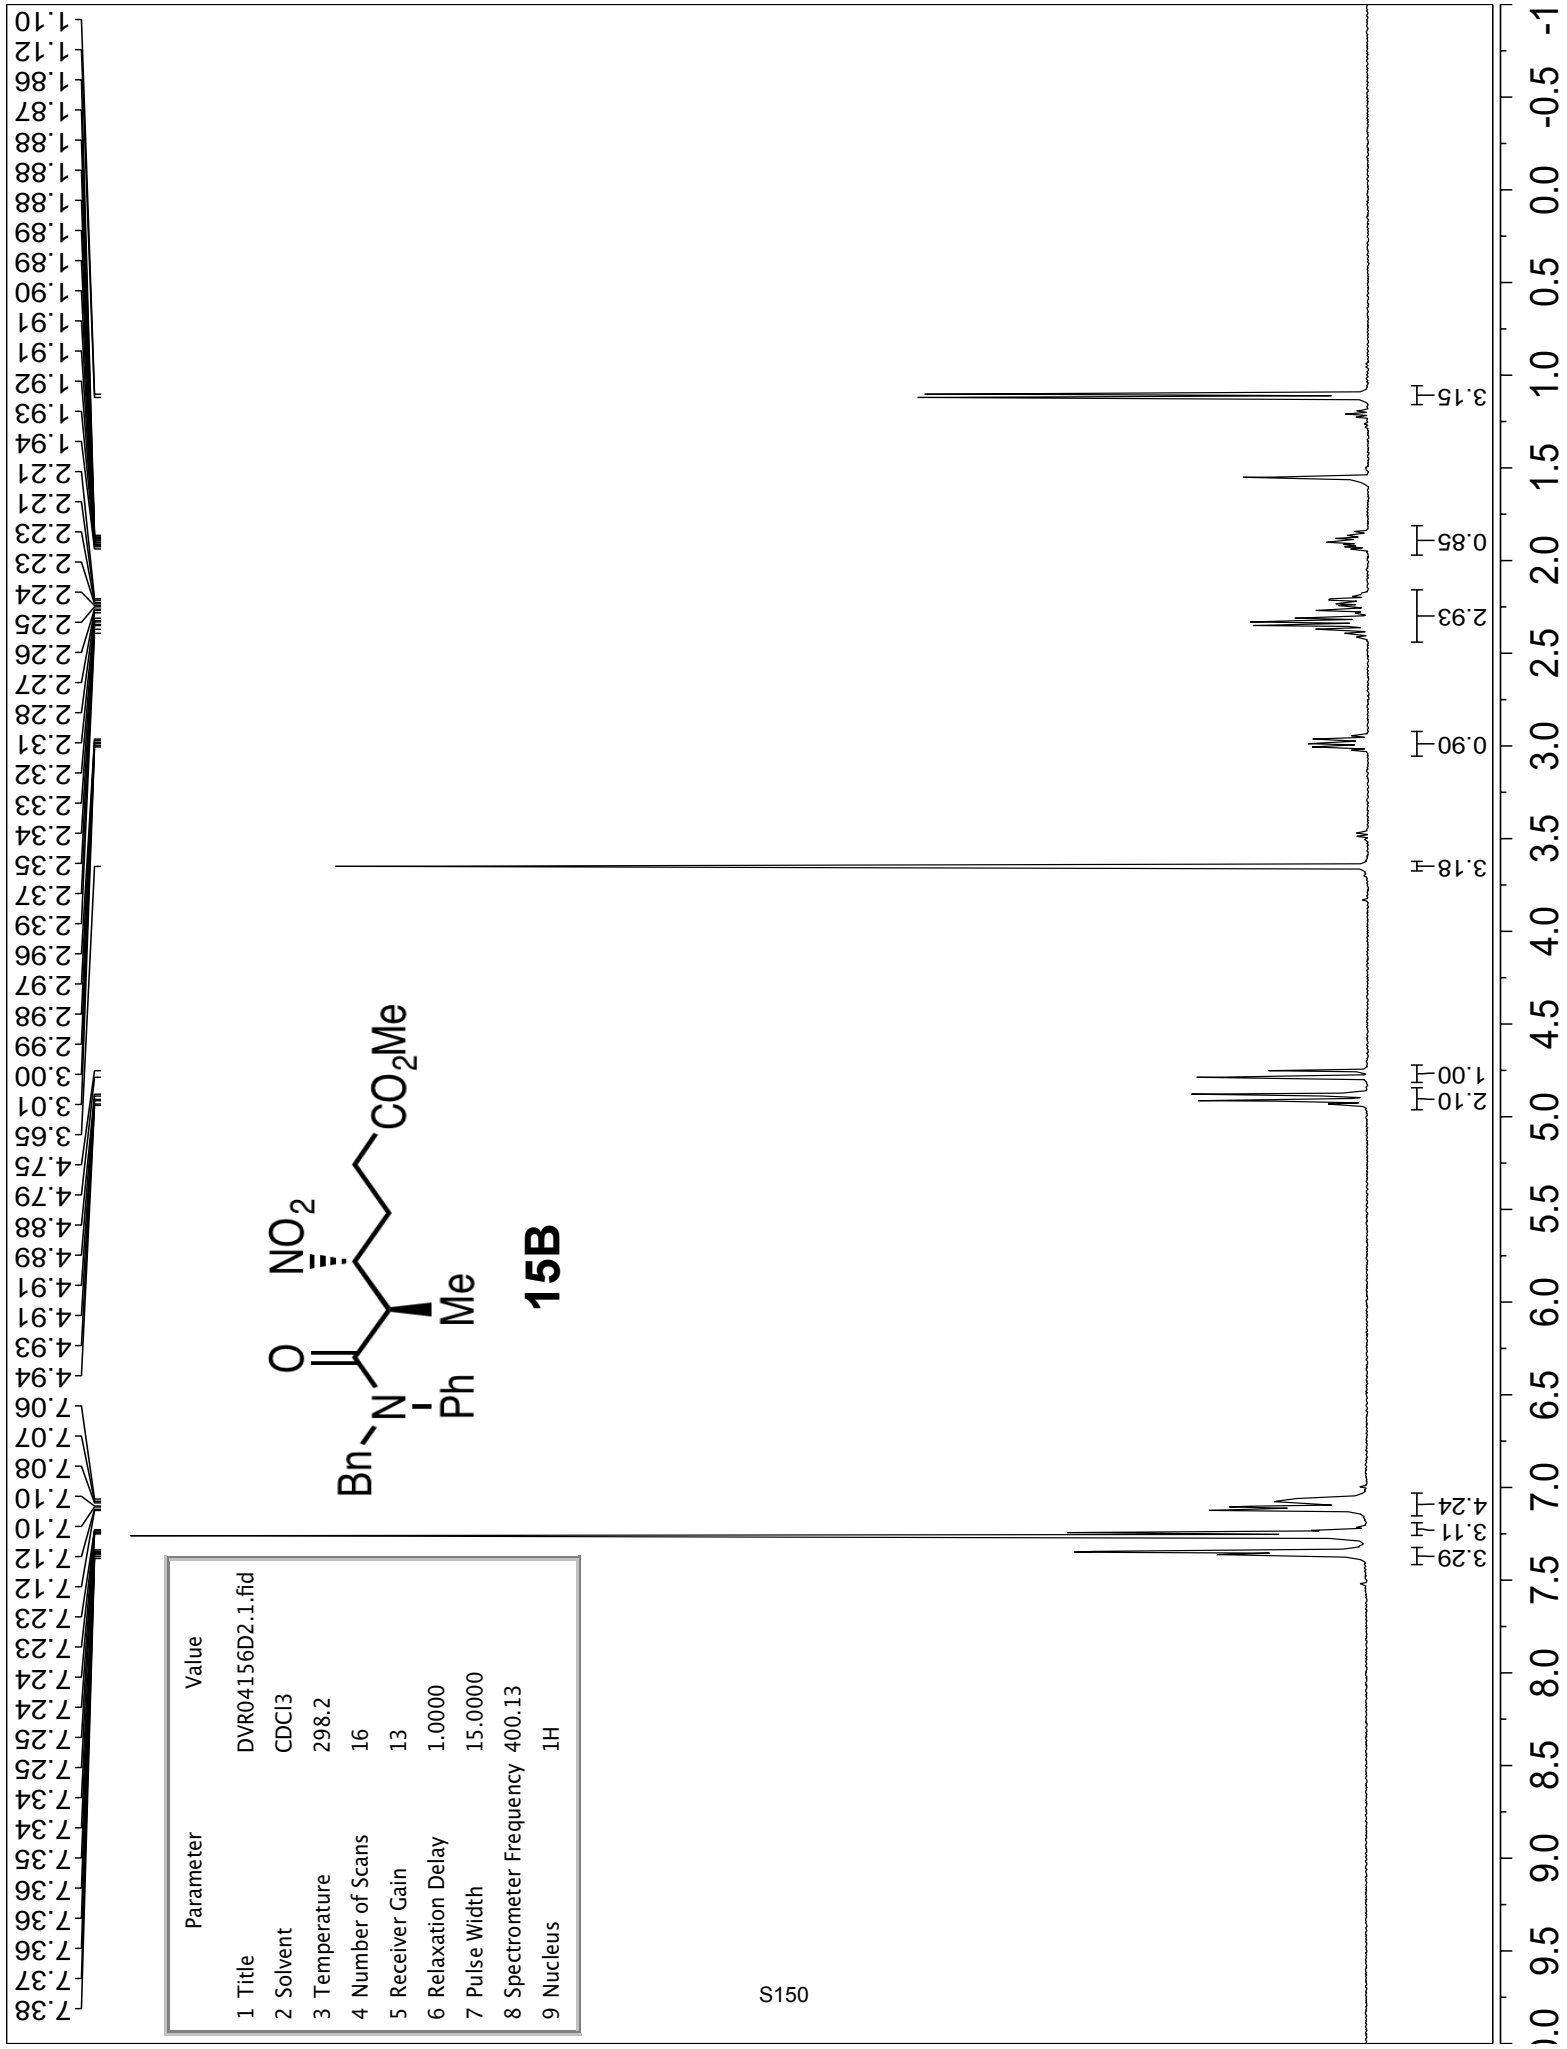

| Parameter                | Value            |
|--------------------------|------------------|
| 1 Title                  | DVR04156D2.2.fid |
| 2 Solvent                | CDCl3            |
| 3 Temperature            | 298.2            |
| 4 Number of Scans        | 1024             |
| 5 Receiver Gain          | 512              |
| 6 Relaxation Delay       | 3.0000           |
| 7 Pulse Width            | 9.2500           |
| 8 Spectrometer Frequency | 100.62           |
| 9 Nucleus                | <sup>13</sup> C  |

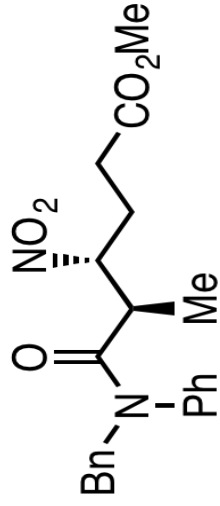

**15B**

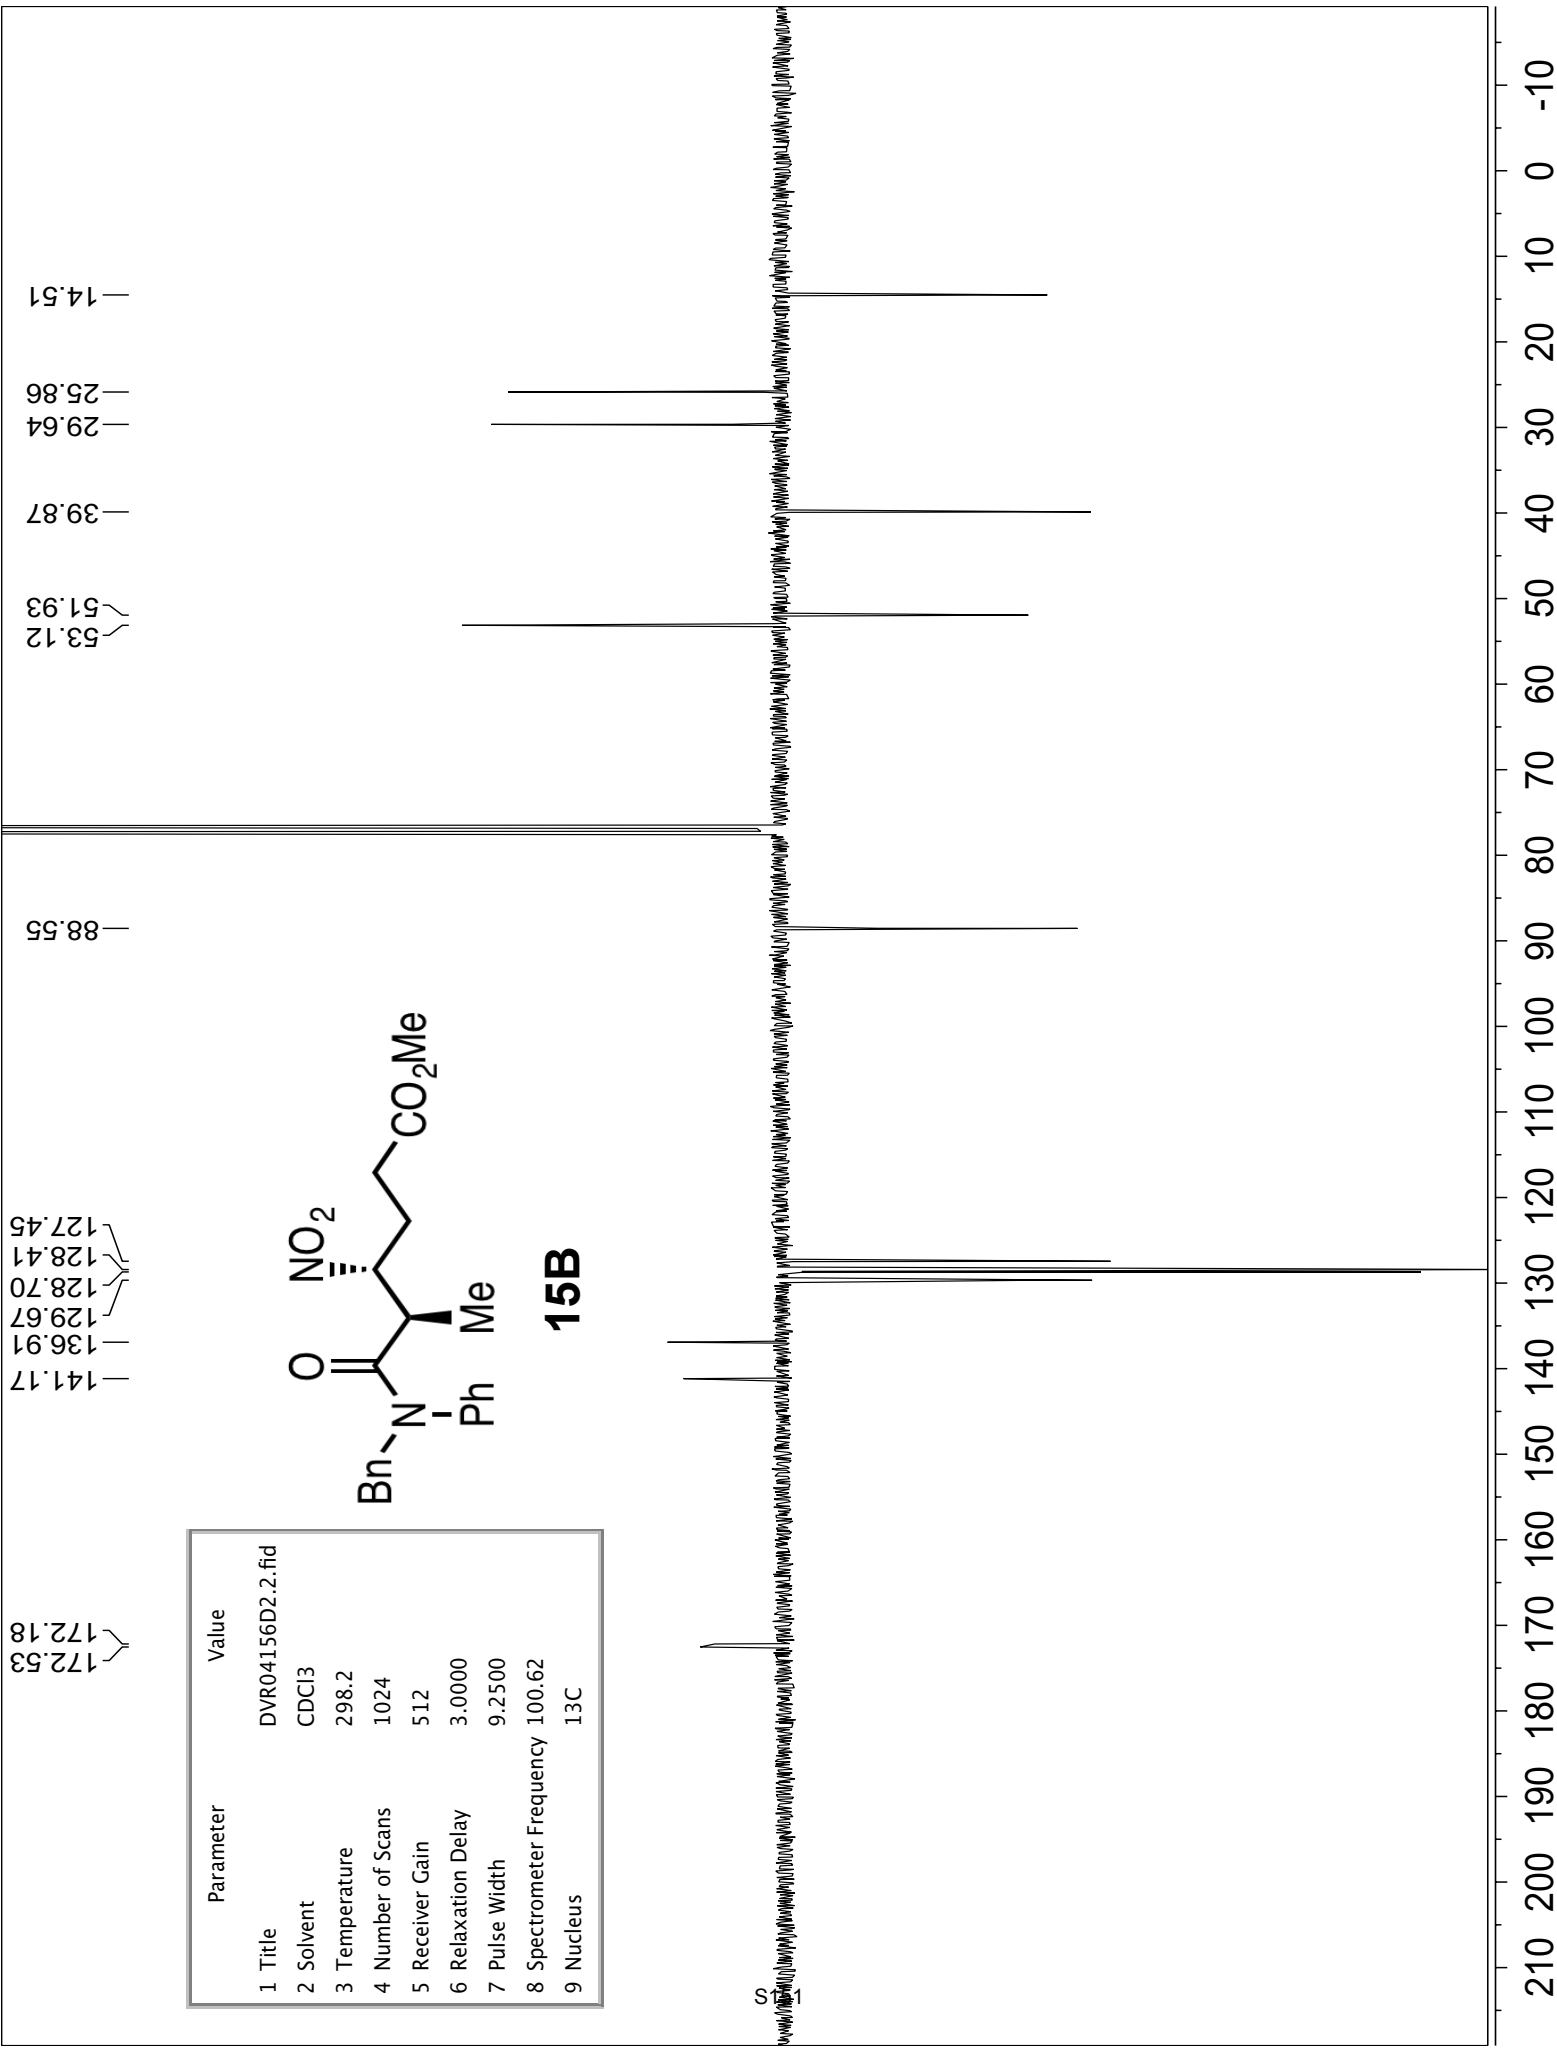

| Parameter                | Value                 |
|--------------------------|-----------------------|
| 1 Title                  | RS-01-247-crude.1.fid |
| 2 Solvent                | CDCI3                 |
| 3 Temperature            | 297.1                 |
| 4 Number of Scans        | 16                    |
| 5 Receiver Gain          | 181                   |
| 6 Relaxation Delay       | 1.0000                |
| 7 Pulse Width            | 10.7700               |
| 8 Spectrometer Frequency | 600.32                |
| 9 Nucleus                | <sup>1</sup> H        |

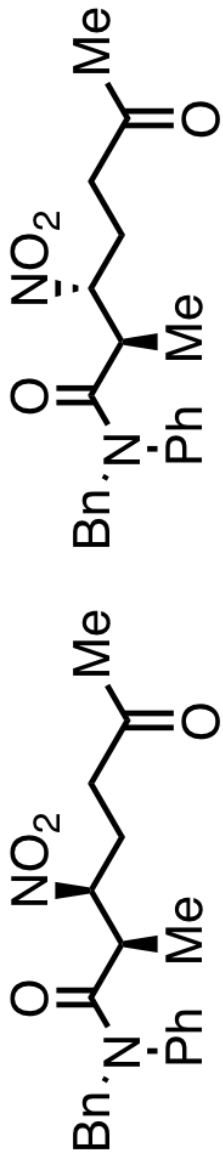

**Crude**

**16A**

**16B**

**67:33**

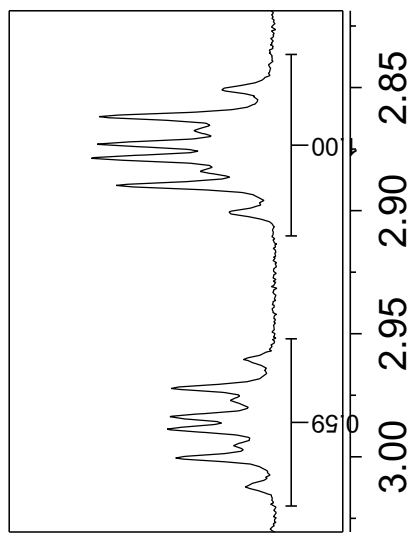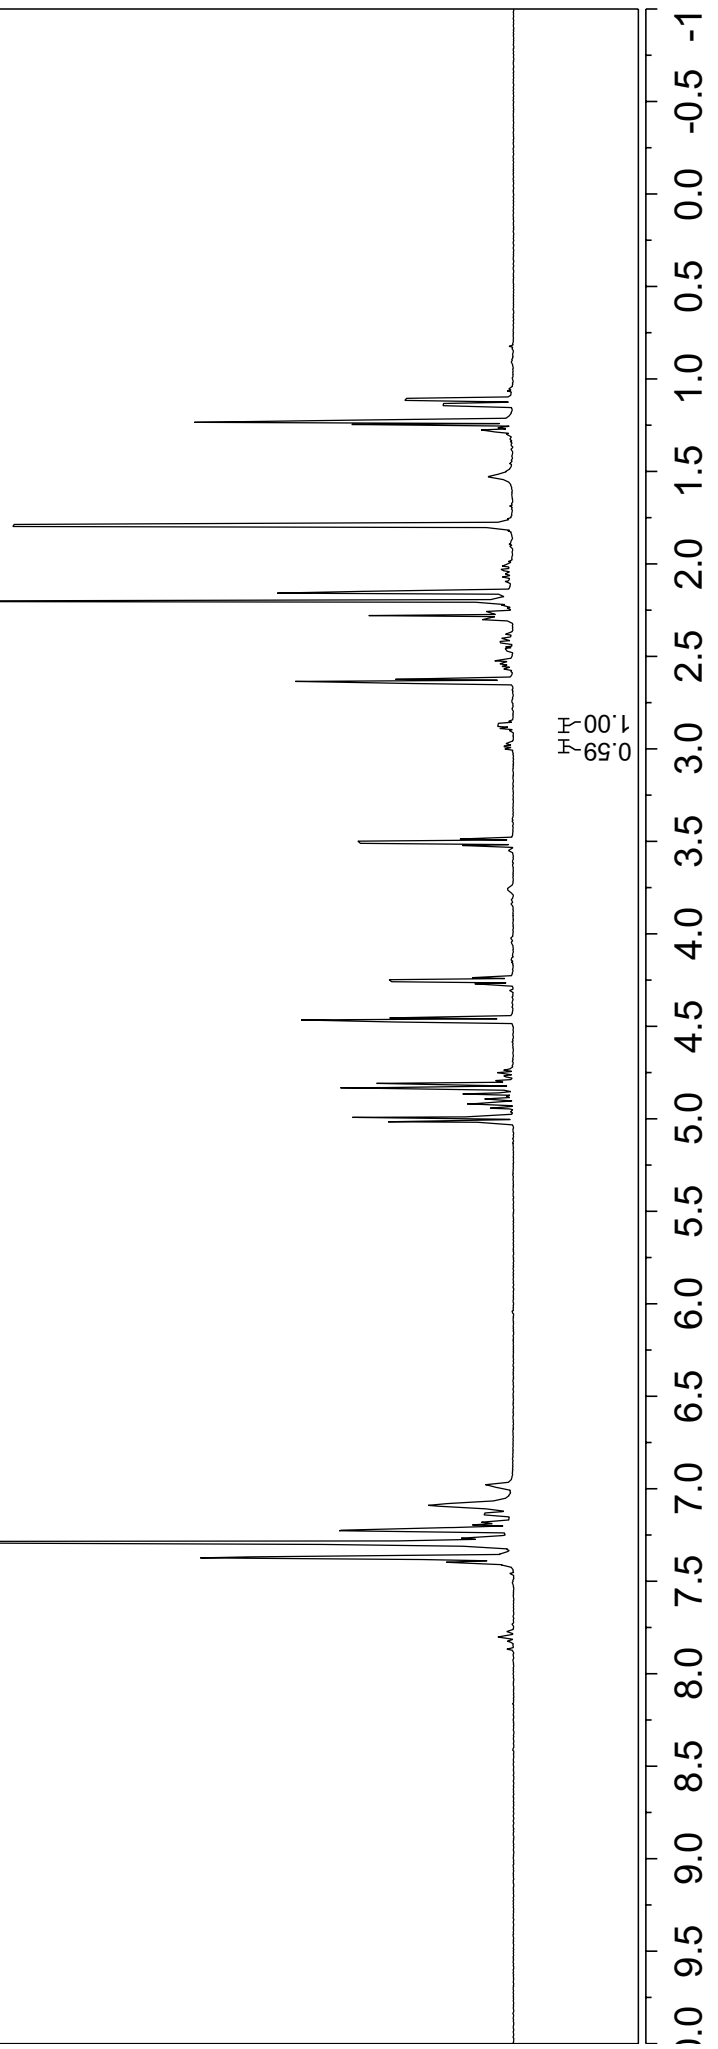

| Parameter                | Value                 |
|--------------------------|-----------------------|
| 1 Title                  | RS-01-247-C2-D1.1.fid |
| 2 Solvent                | CDCl3                 |
| 3 Temperature            | 298.0                 |
| 4 Number of Scans        | 16                    |
| 5 Receiver Gain          | 144                   |
| 6 Relaxation Delay       | 1.0000                |
| 7 Pulse Width            | 10.7700               |
| 8 Spectrometer Frequency | 600.32                |
| 9 Nucleus                | <sup>1</sup> H        |

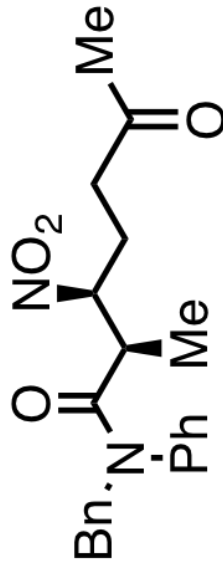

**16A**

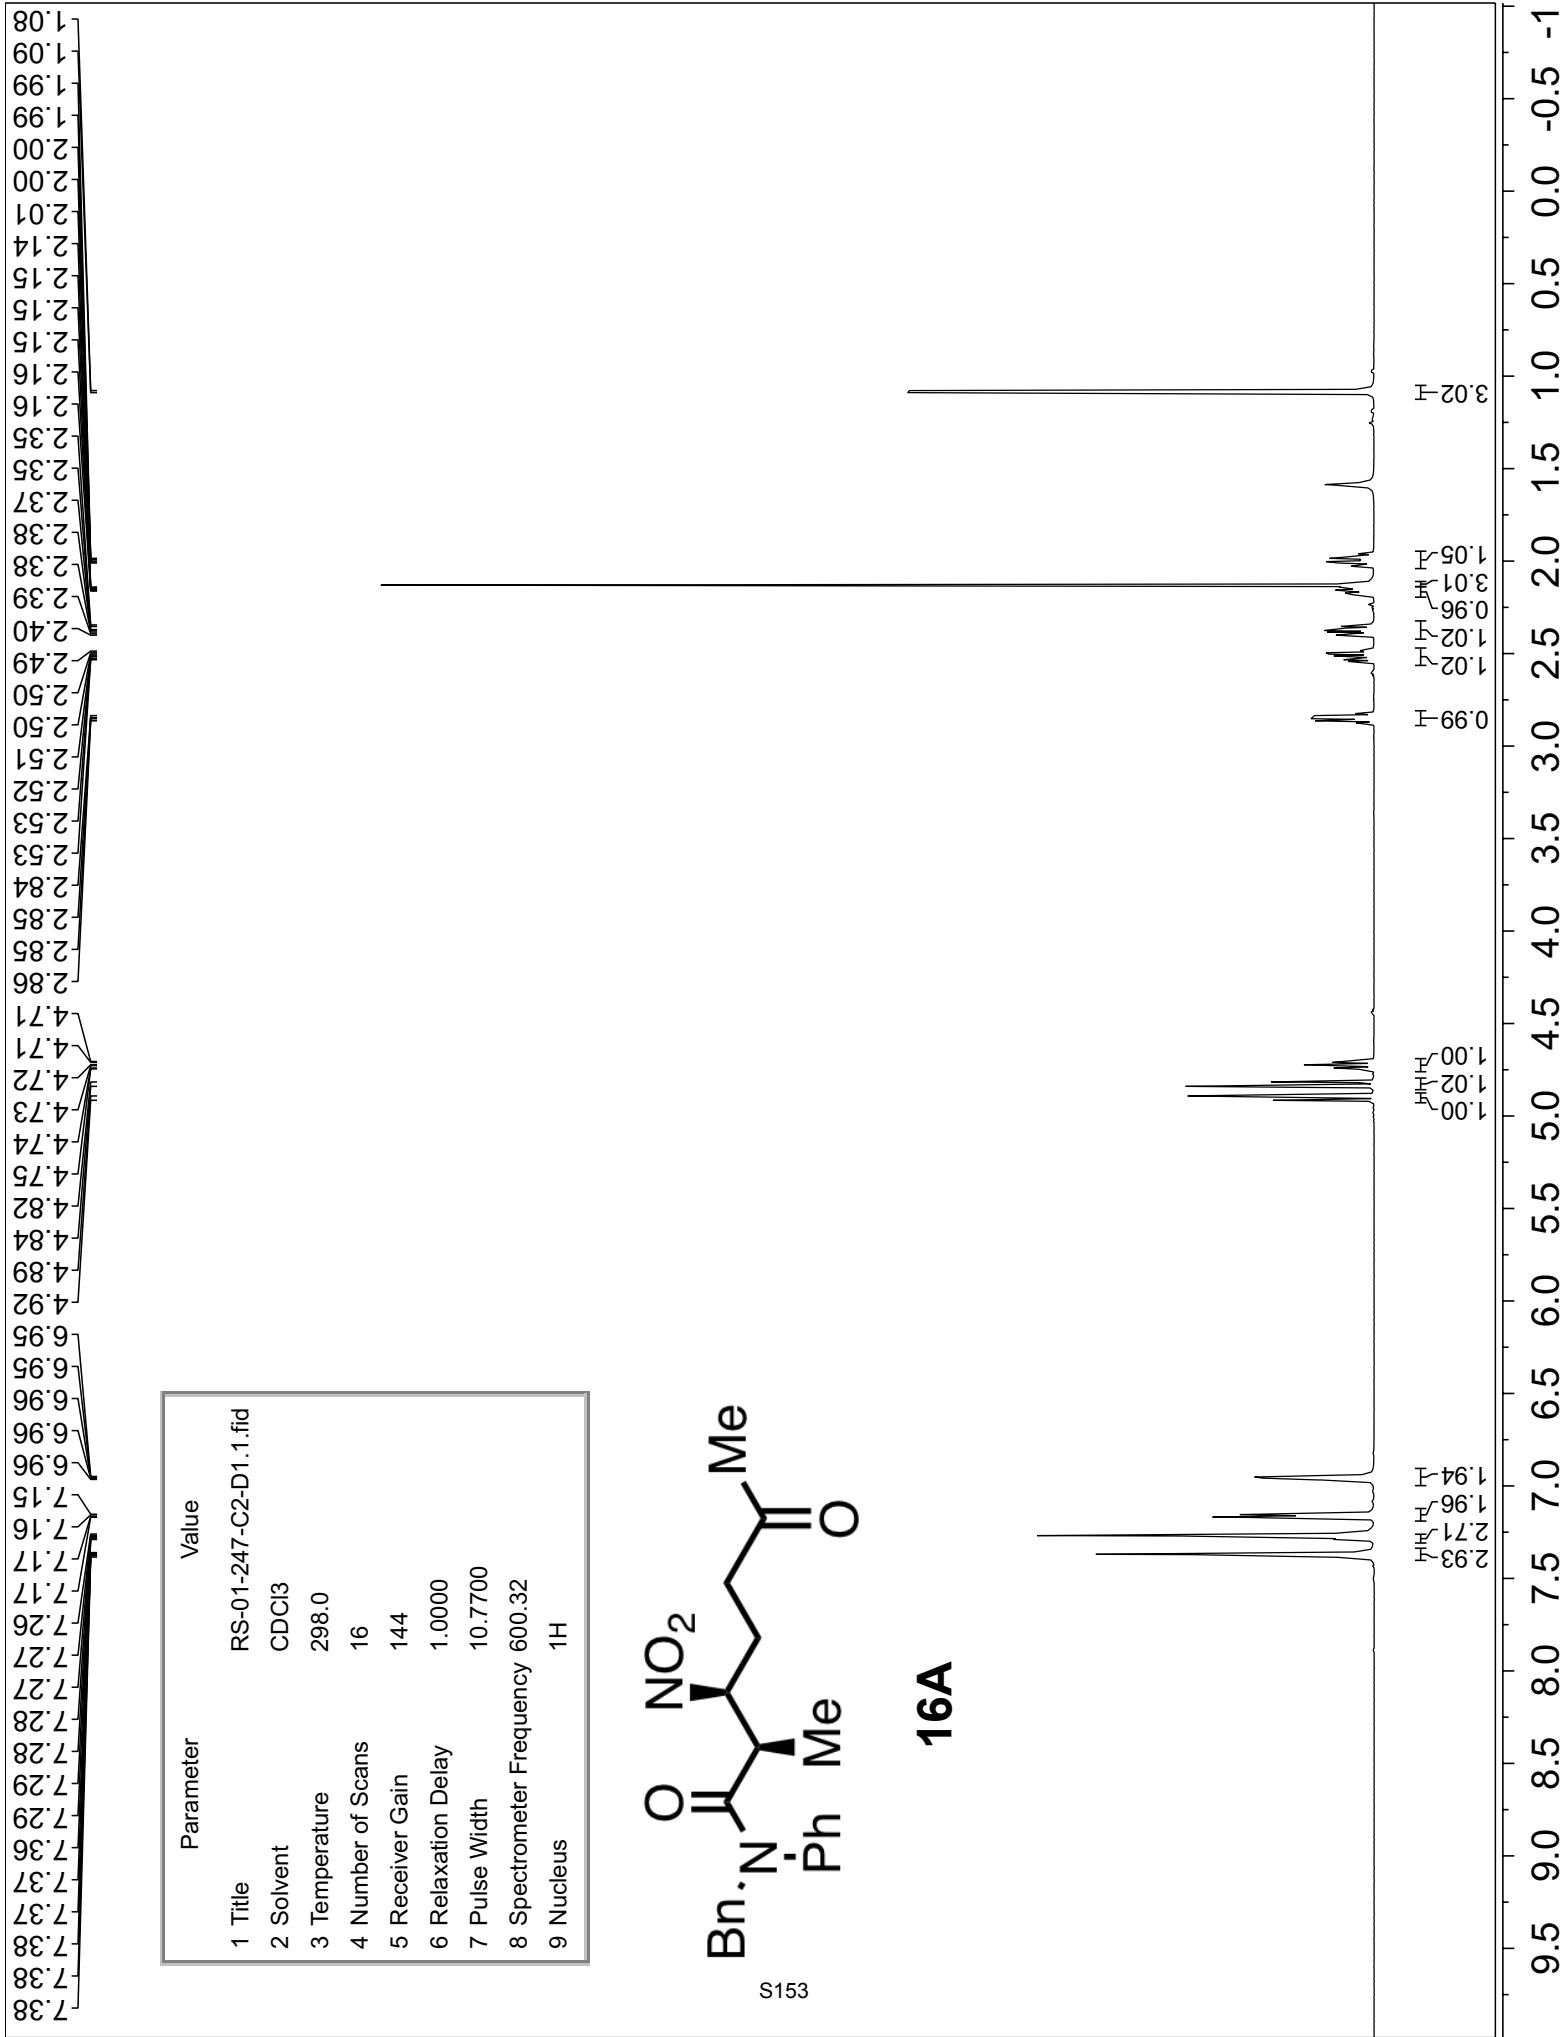

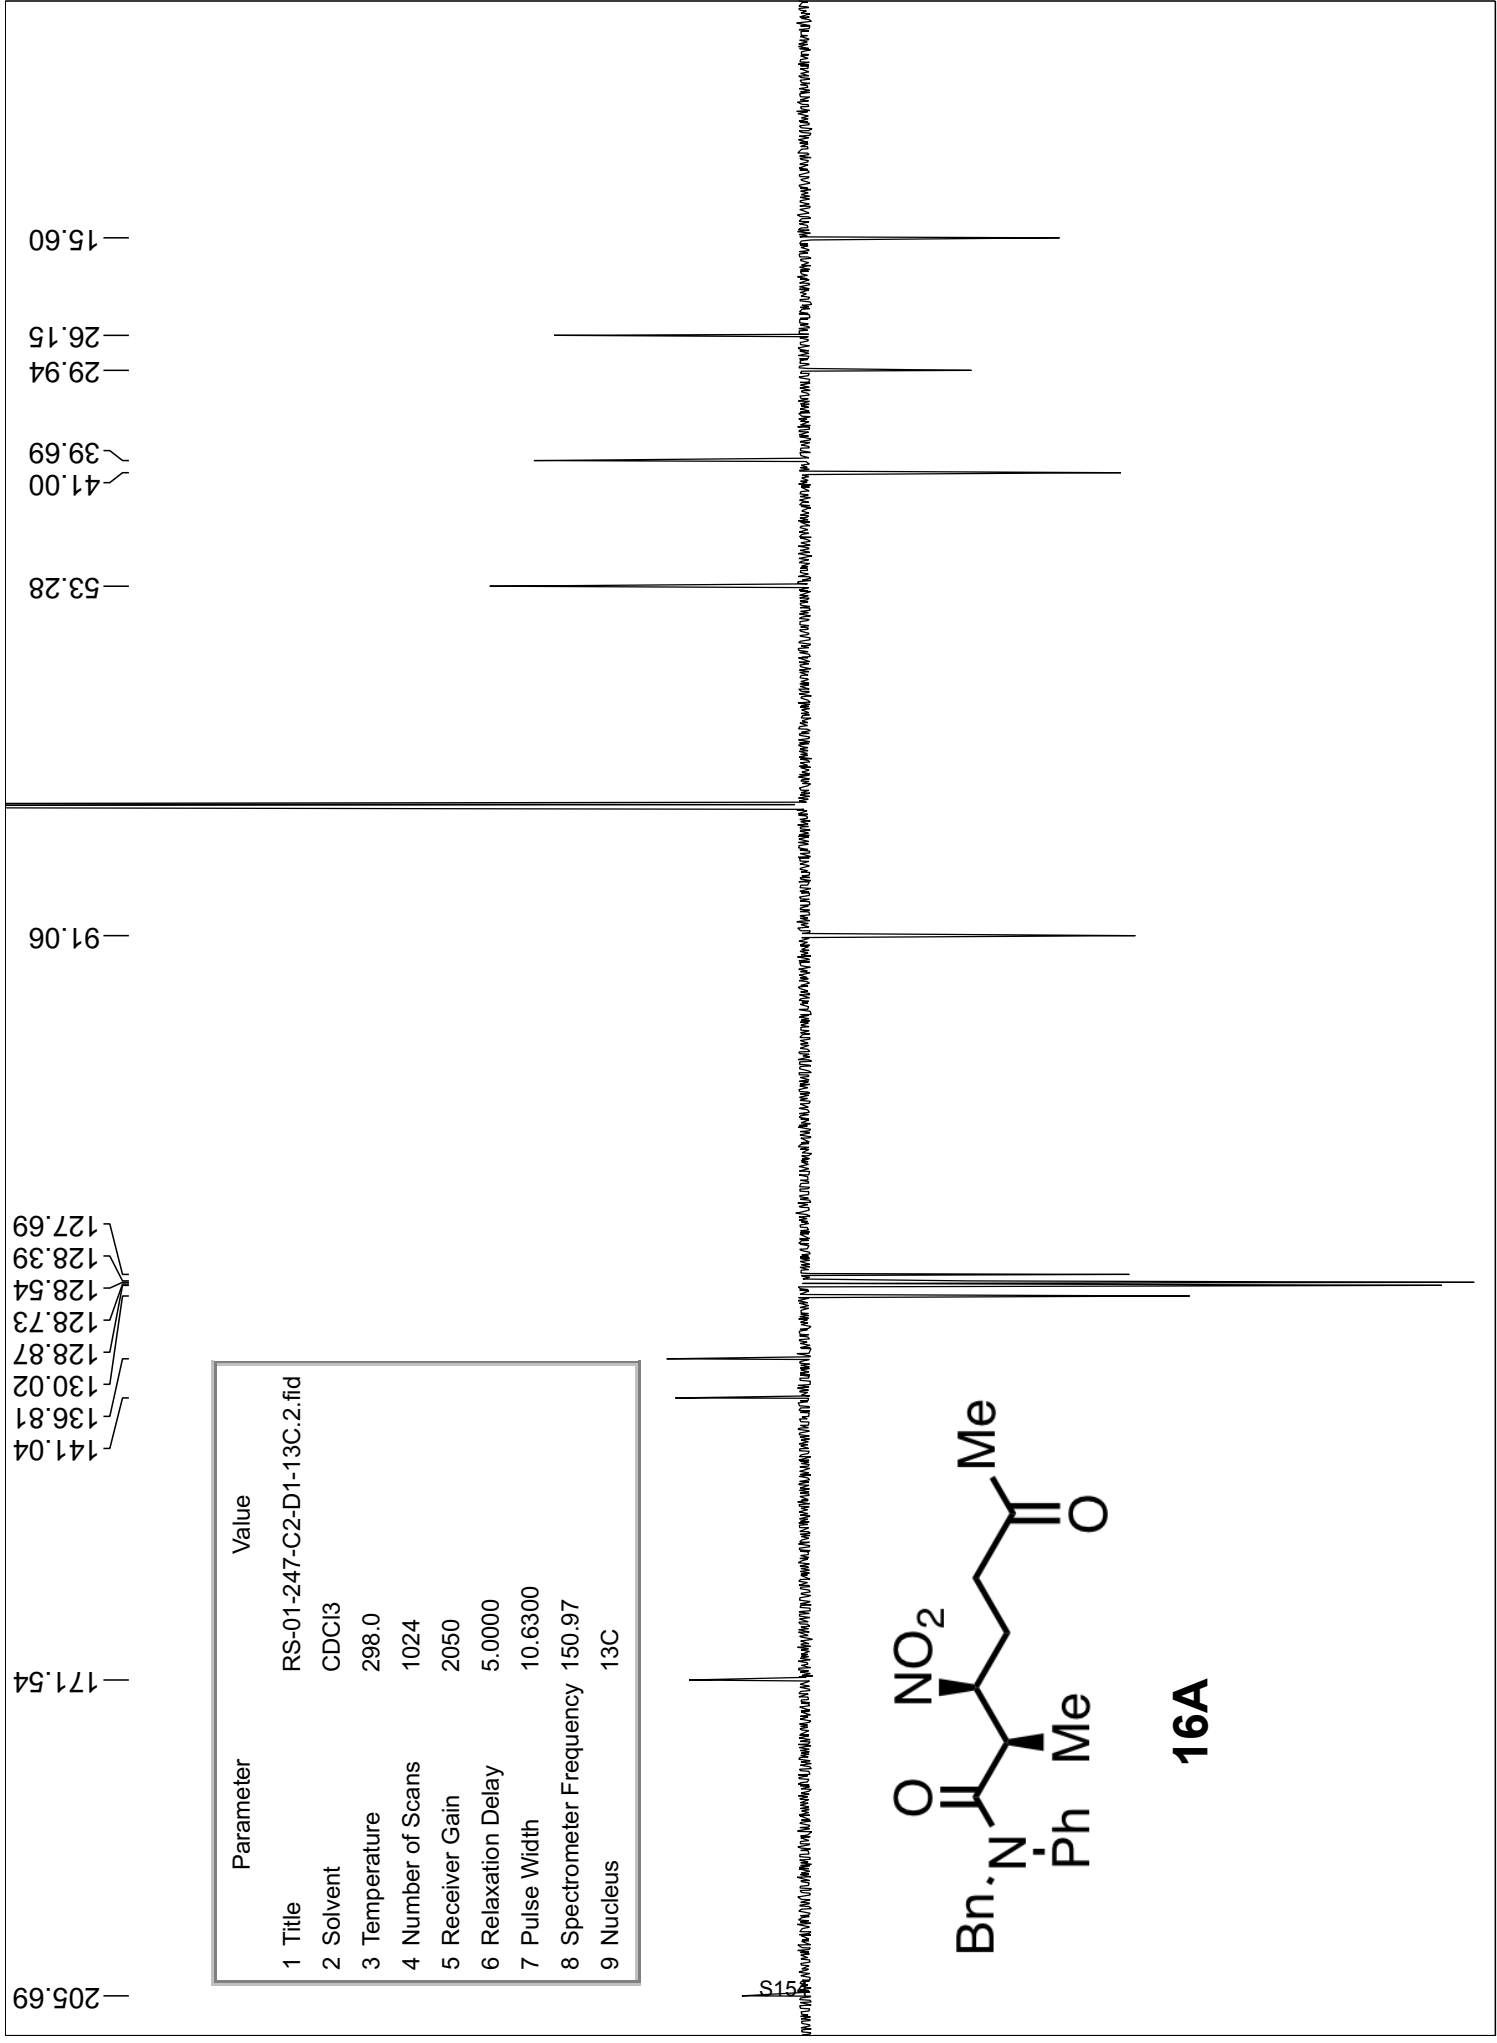

10 200 190 180 170 160 150 140 130 120 110 100 90 80 70 60 50 40 30 20 10 0 -1



| Parameter                | Value              |
|--------------------------|--------------------|
| 1 Title                  | RS-01-247-D2.1.fid |
| 2 Solvent                | CDCl3              |
| 3 Temperature            | 297.5              |
| 4 Number of Scans        | 16                 |
| 5 Receiver Gain          | 64                 |
| 6 Relaxation Delay       | 10.0000            |
| 7 Pulse Width            | 10.7700            |
| 8 Spectrometer Frequency | 600.32             |
| 9 Nucleus                | <sup>1</sup> H     |

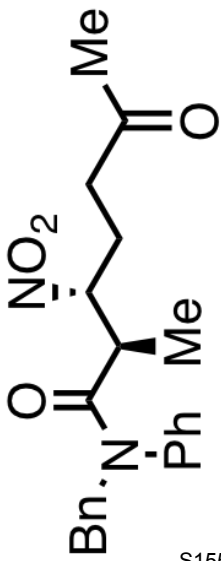

**16B**

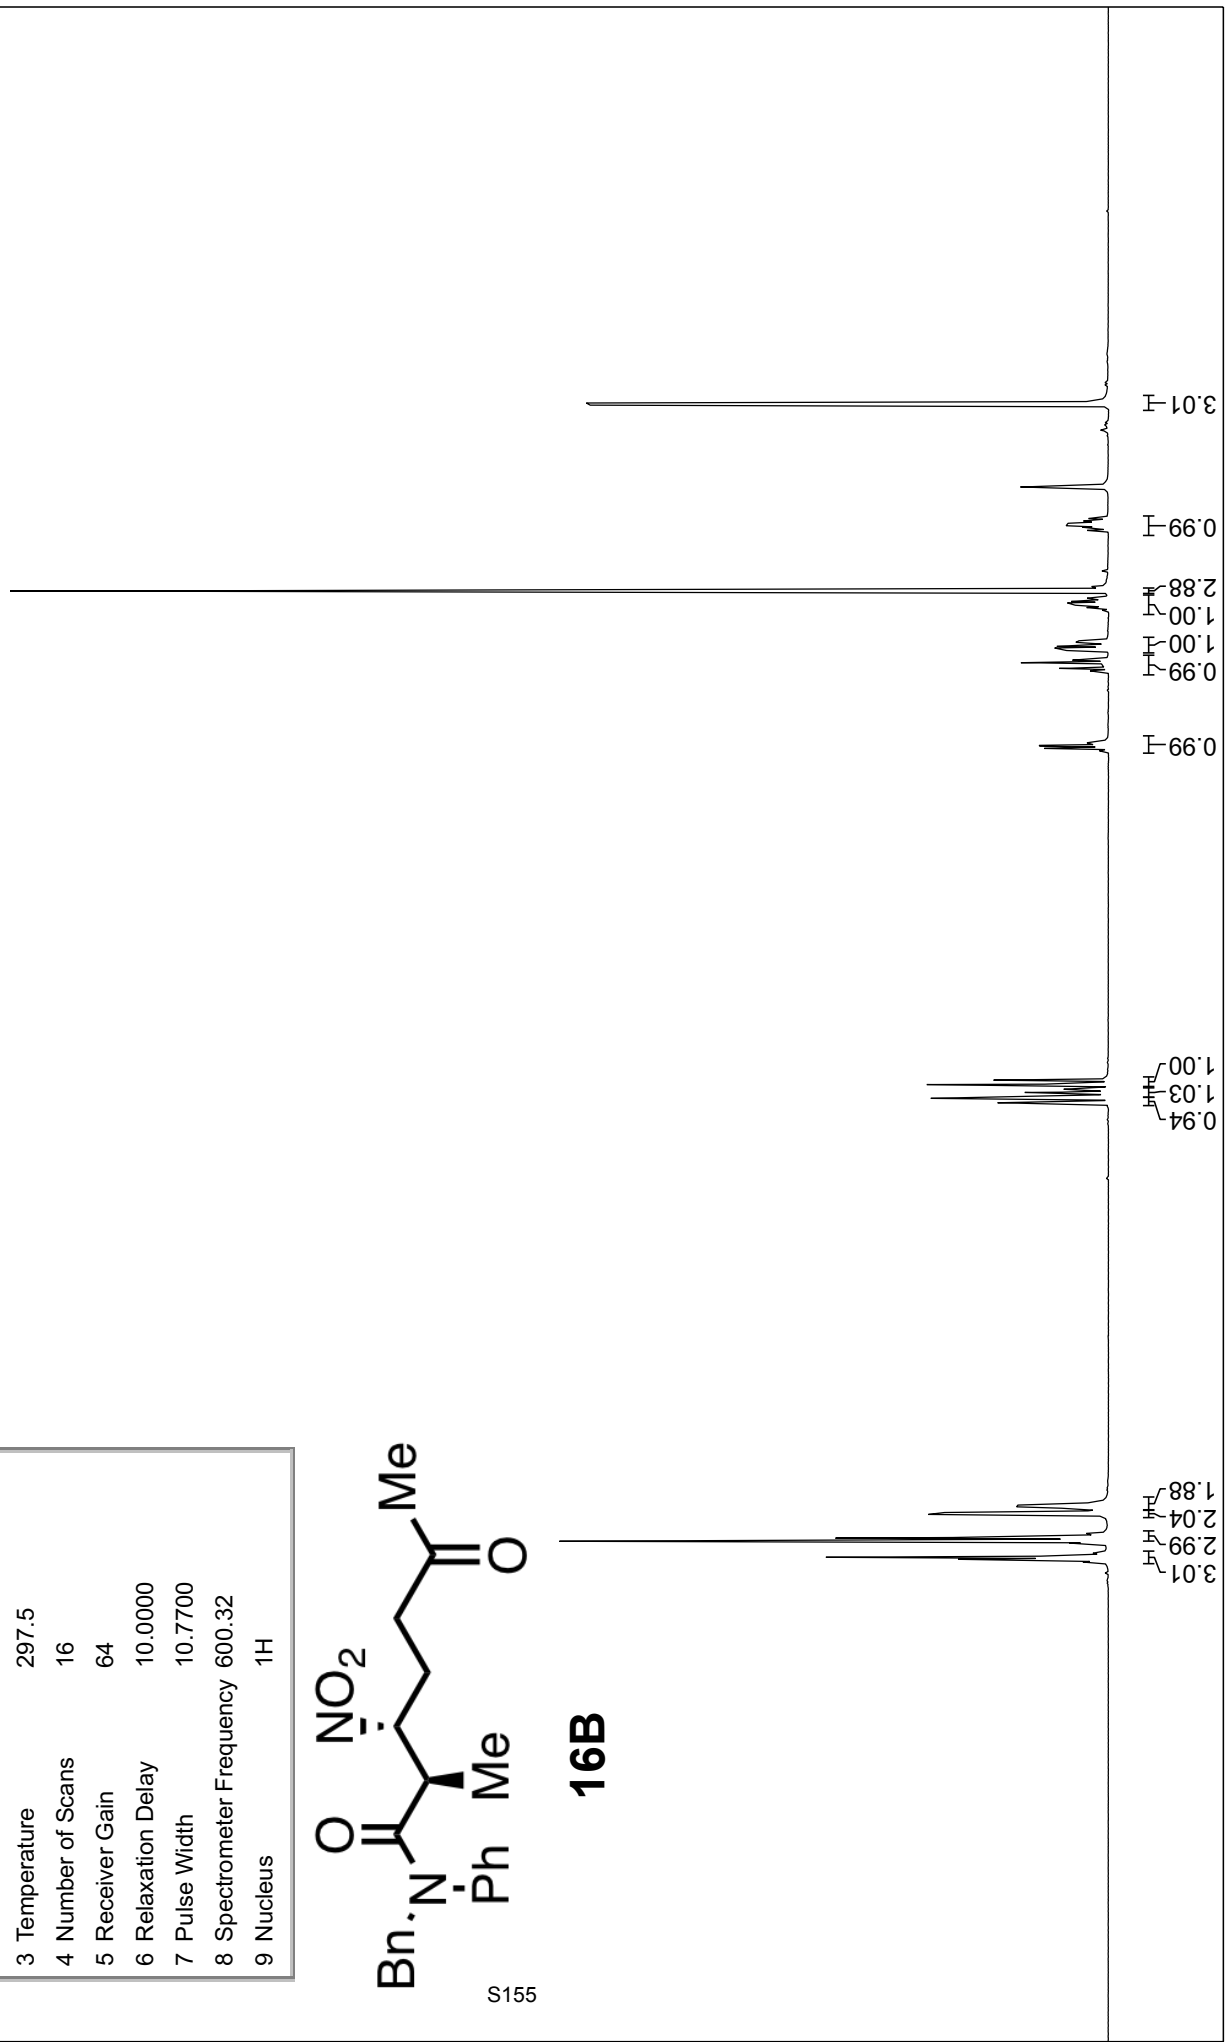

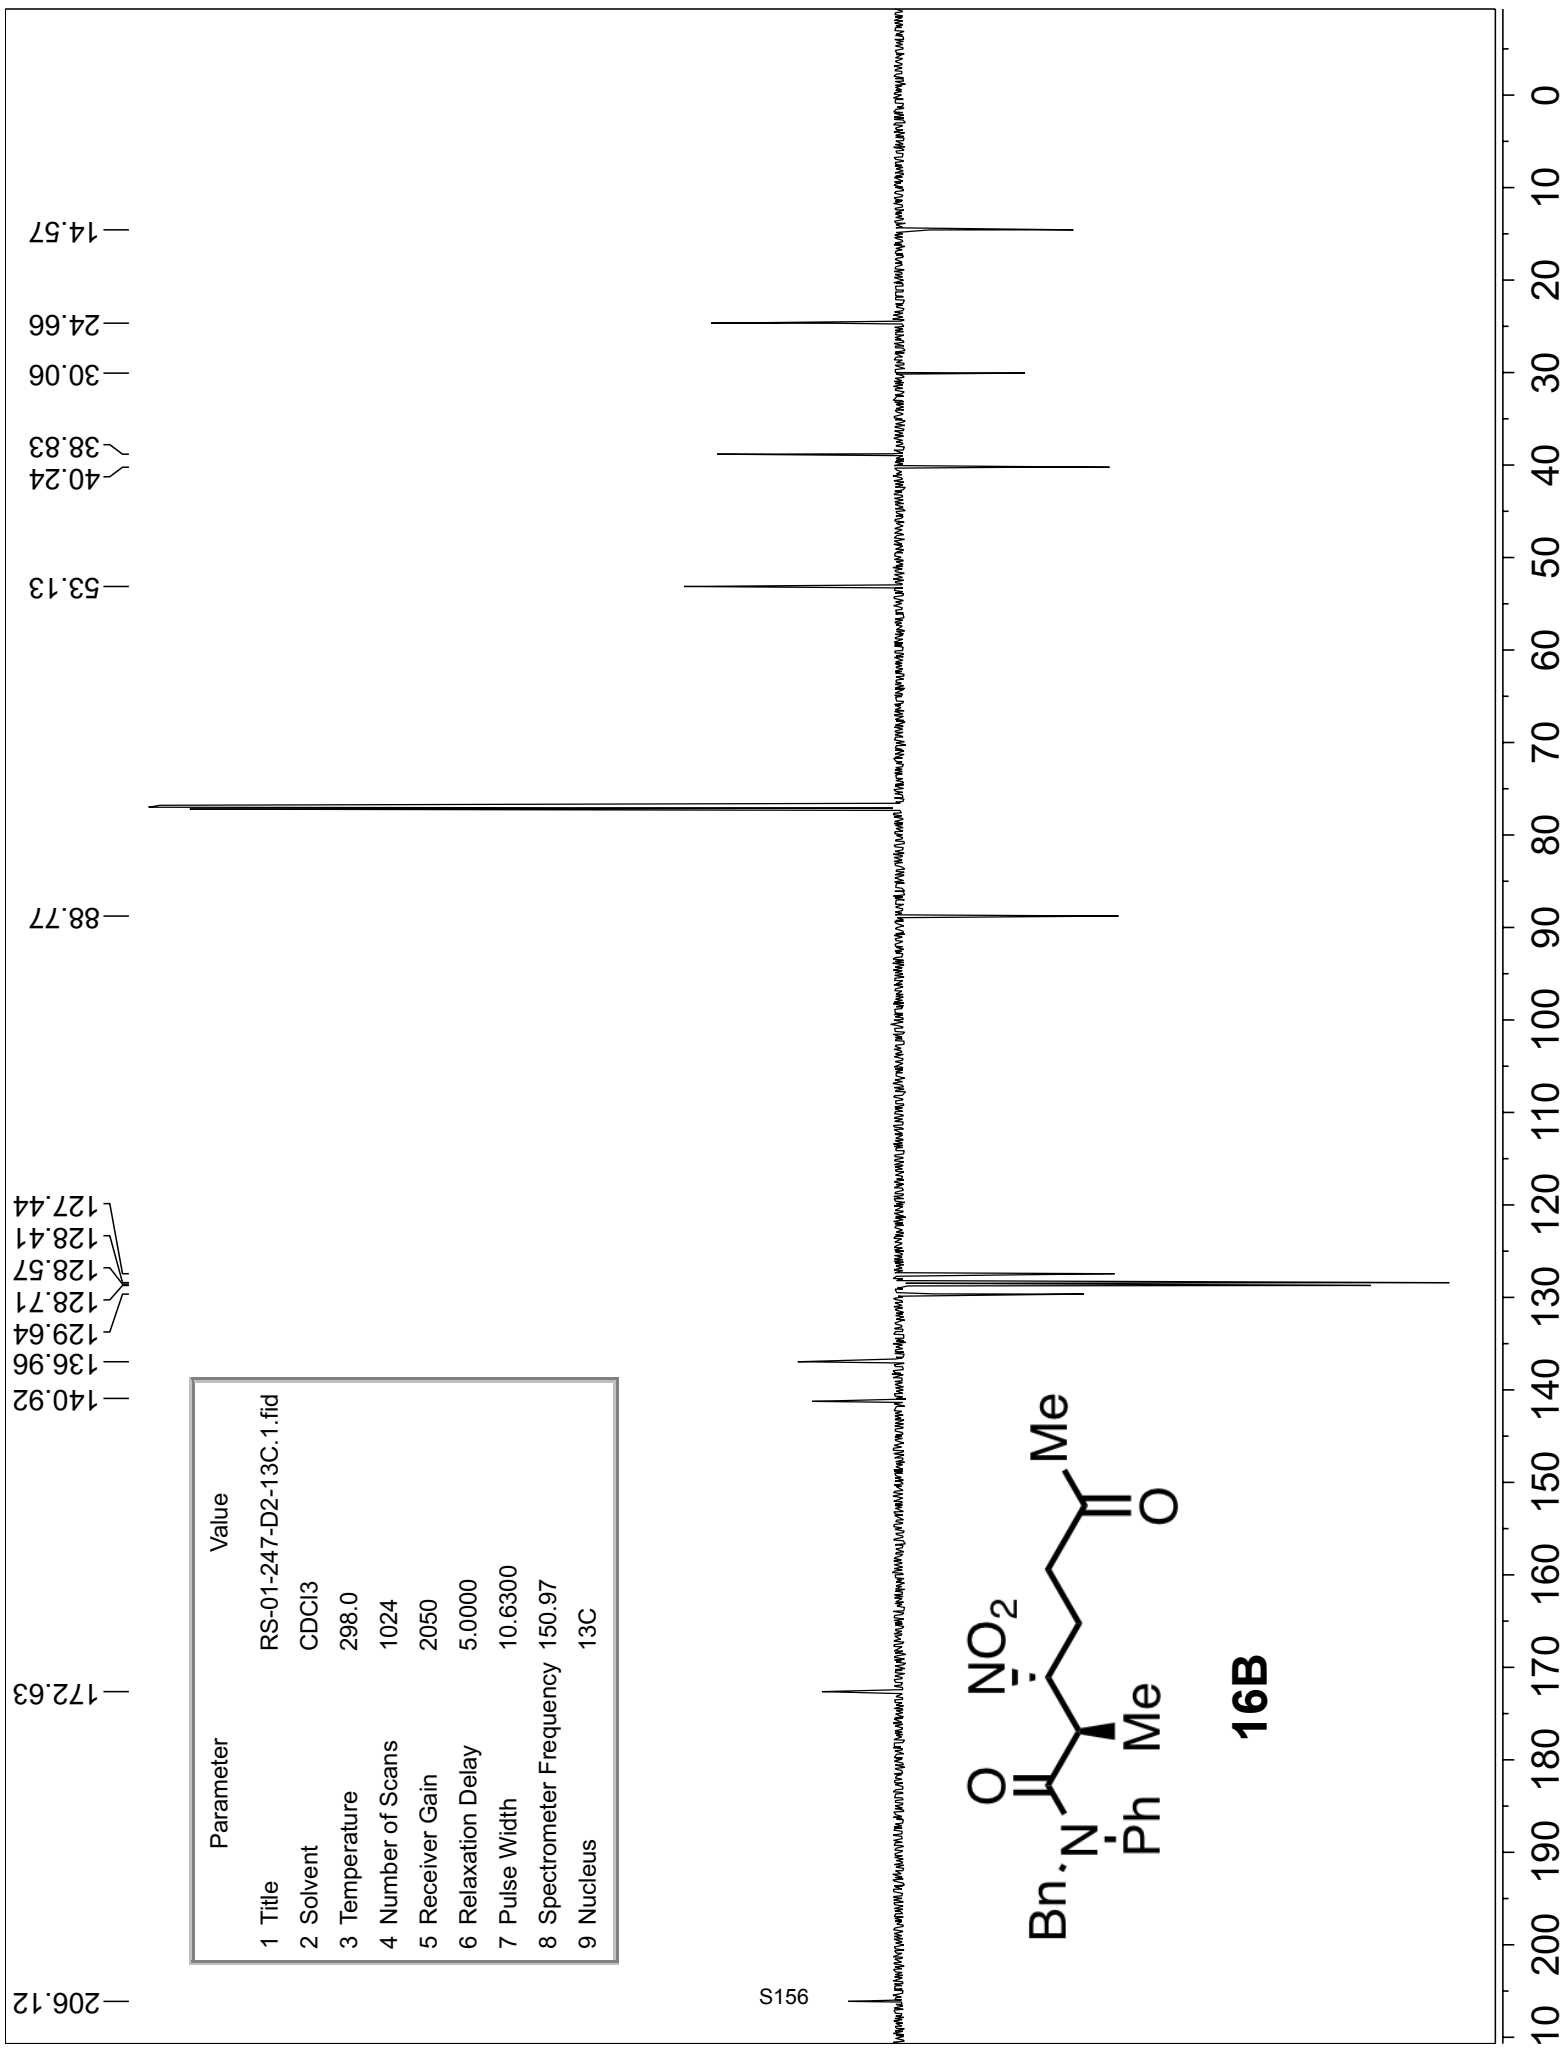

| Parameter                | Value                  |
|--------------------------|------------------------|
| 1 Title                  | RS-01-247-D2-13C.1.fid |
| 2 Solvent                | CDCl3                  |
| 3 Temperature            | 298.0                  |
| 4 Number of Scans        | 1024                   |
| 5 Receiver Gain          | 2050                   |
| 6 Relaxation Delay       | 5.0000                 |
| 7 Pulse Width            | 10.6300                |
| 8 Spectrometer Frequency | 150.97                 |
| 9 Nucleus                | 13C                    |

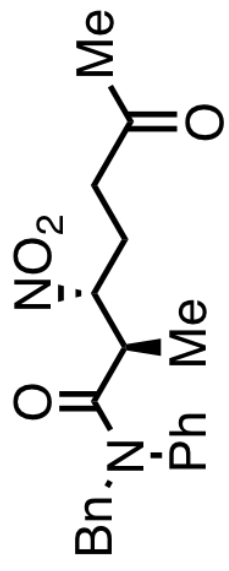

**16B**

Parameter Value

1 Title DVR04176CRD.1.fid  
2 Solvent CDCl3  
3 Temperature 298.2  
4 Number of Scans 16  
5 Receiver Gain 4  
6 Relaxation Delay 1.0000  
7 Pulse Width 15.0000  
8 Spectrometer Frequency 400.13  
9 Nucleus 1H

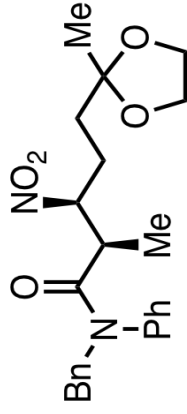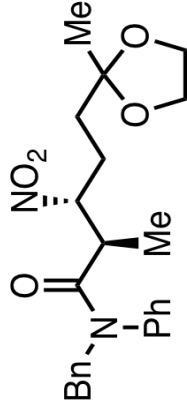

**17A**

**71:29**

**17B**

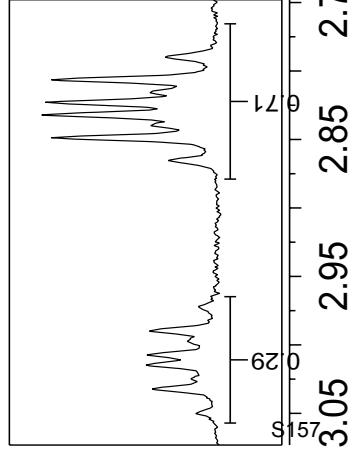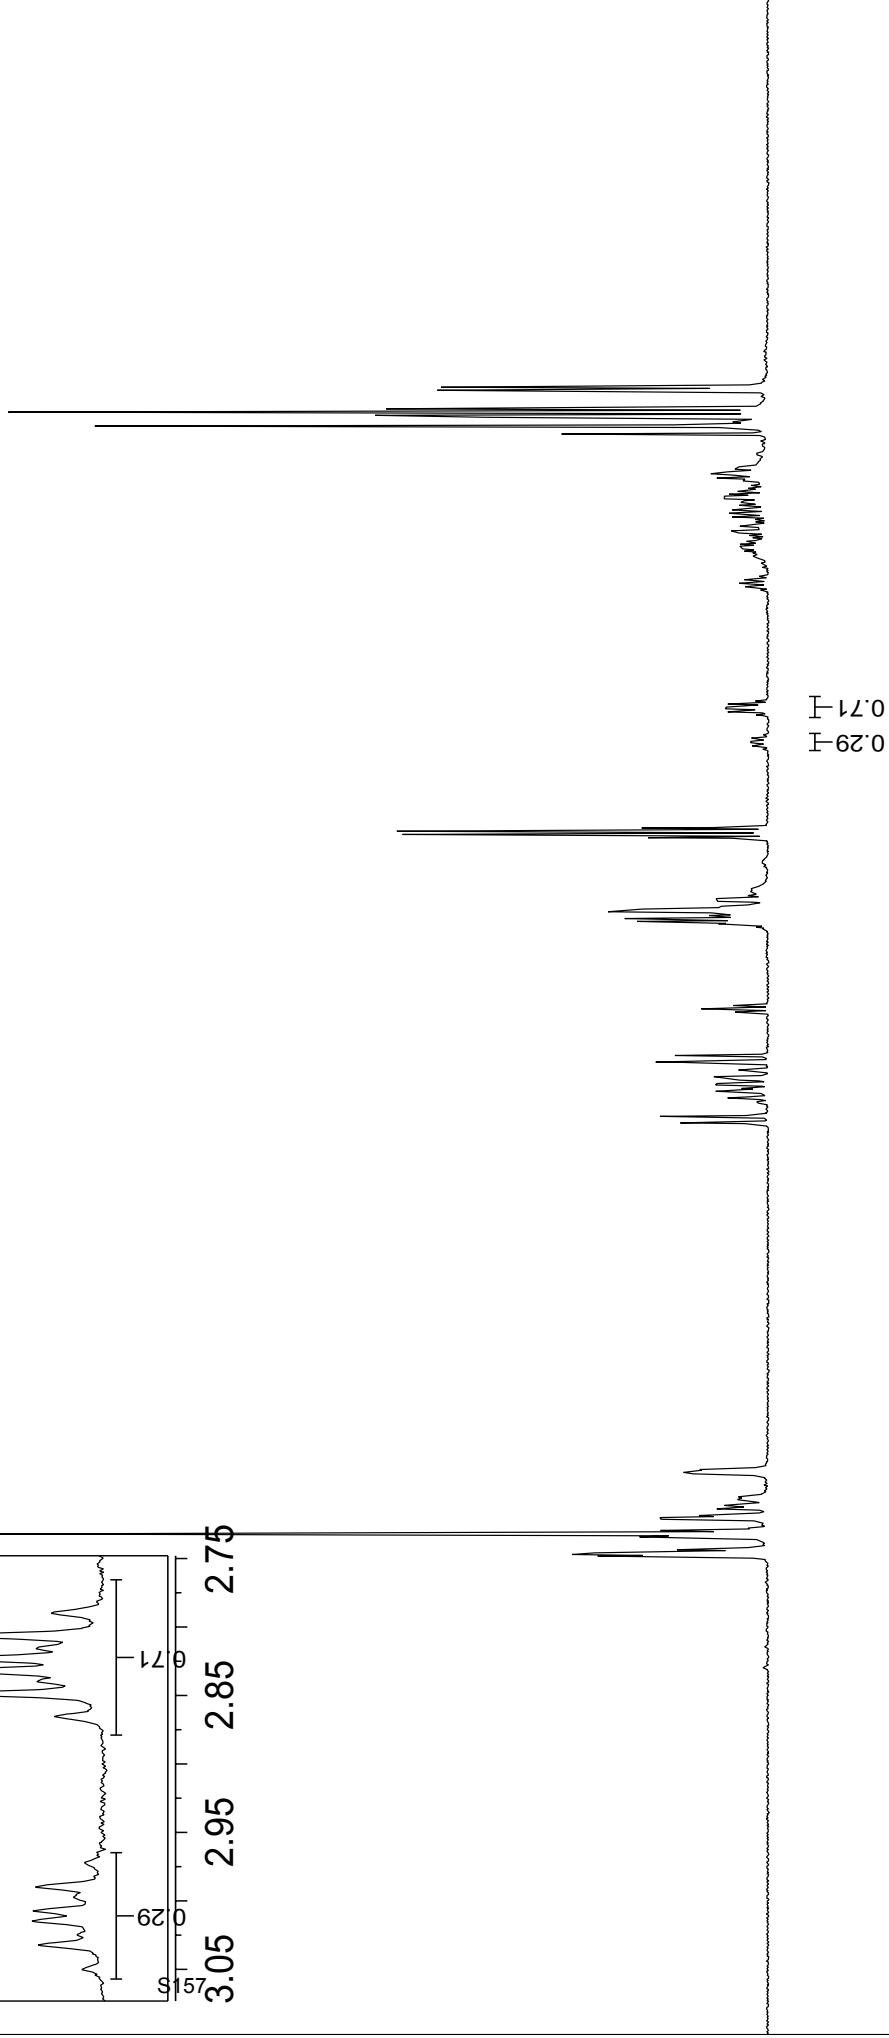

9.5 9.0 8.5 8.0 7.5 7.0 6.5 6.0 5.5 5.0 4.5 4.0 3.5 3.0 2.5 2.0 1.5 1.0 0.5 0.0 -0.5 -1

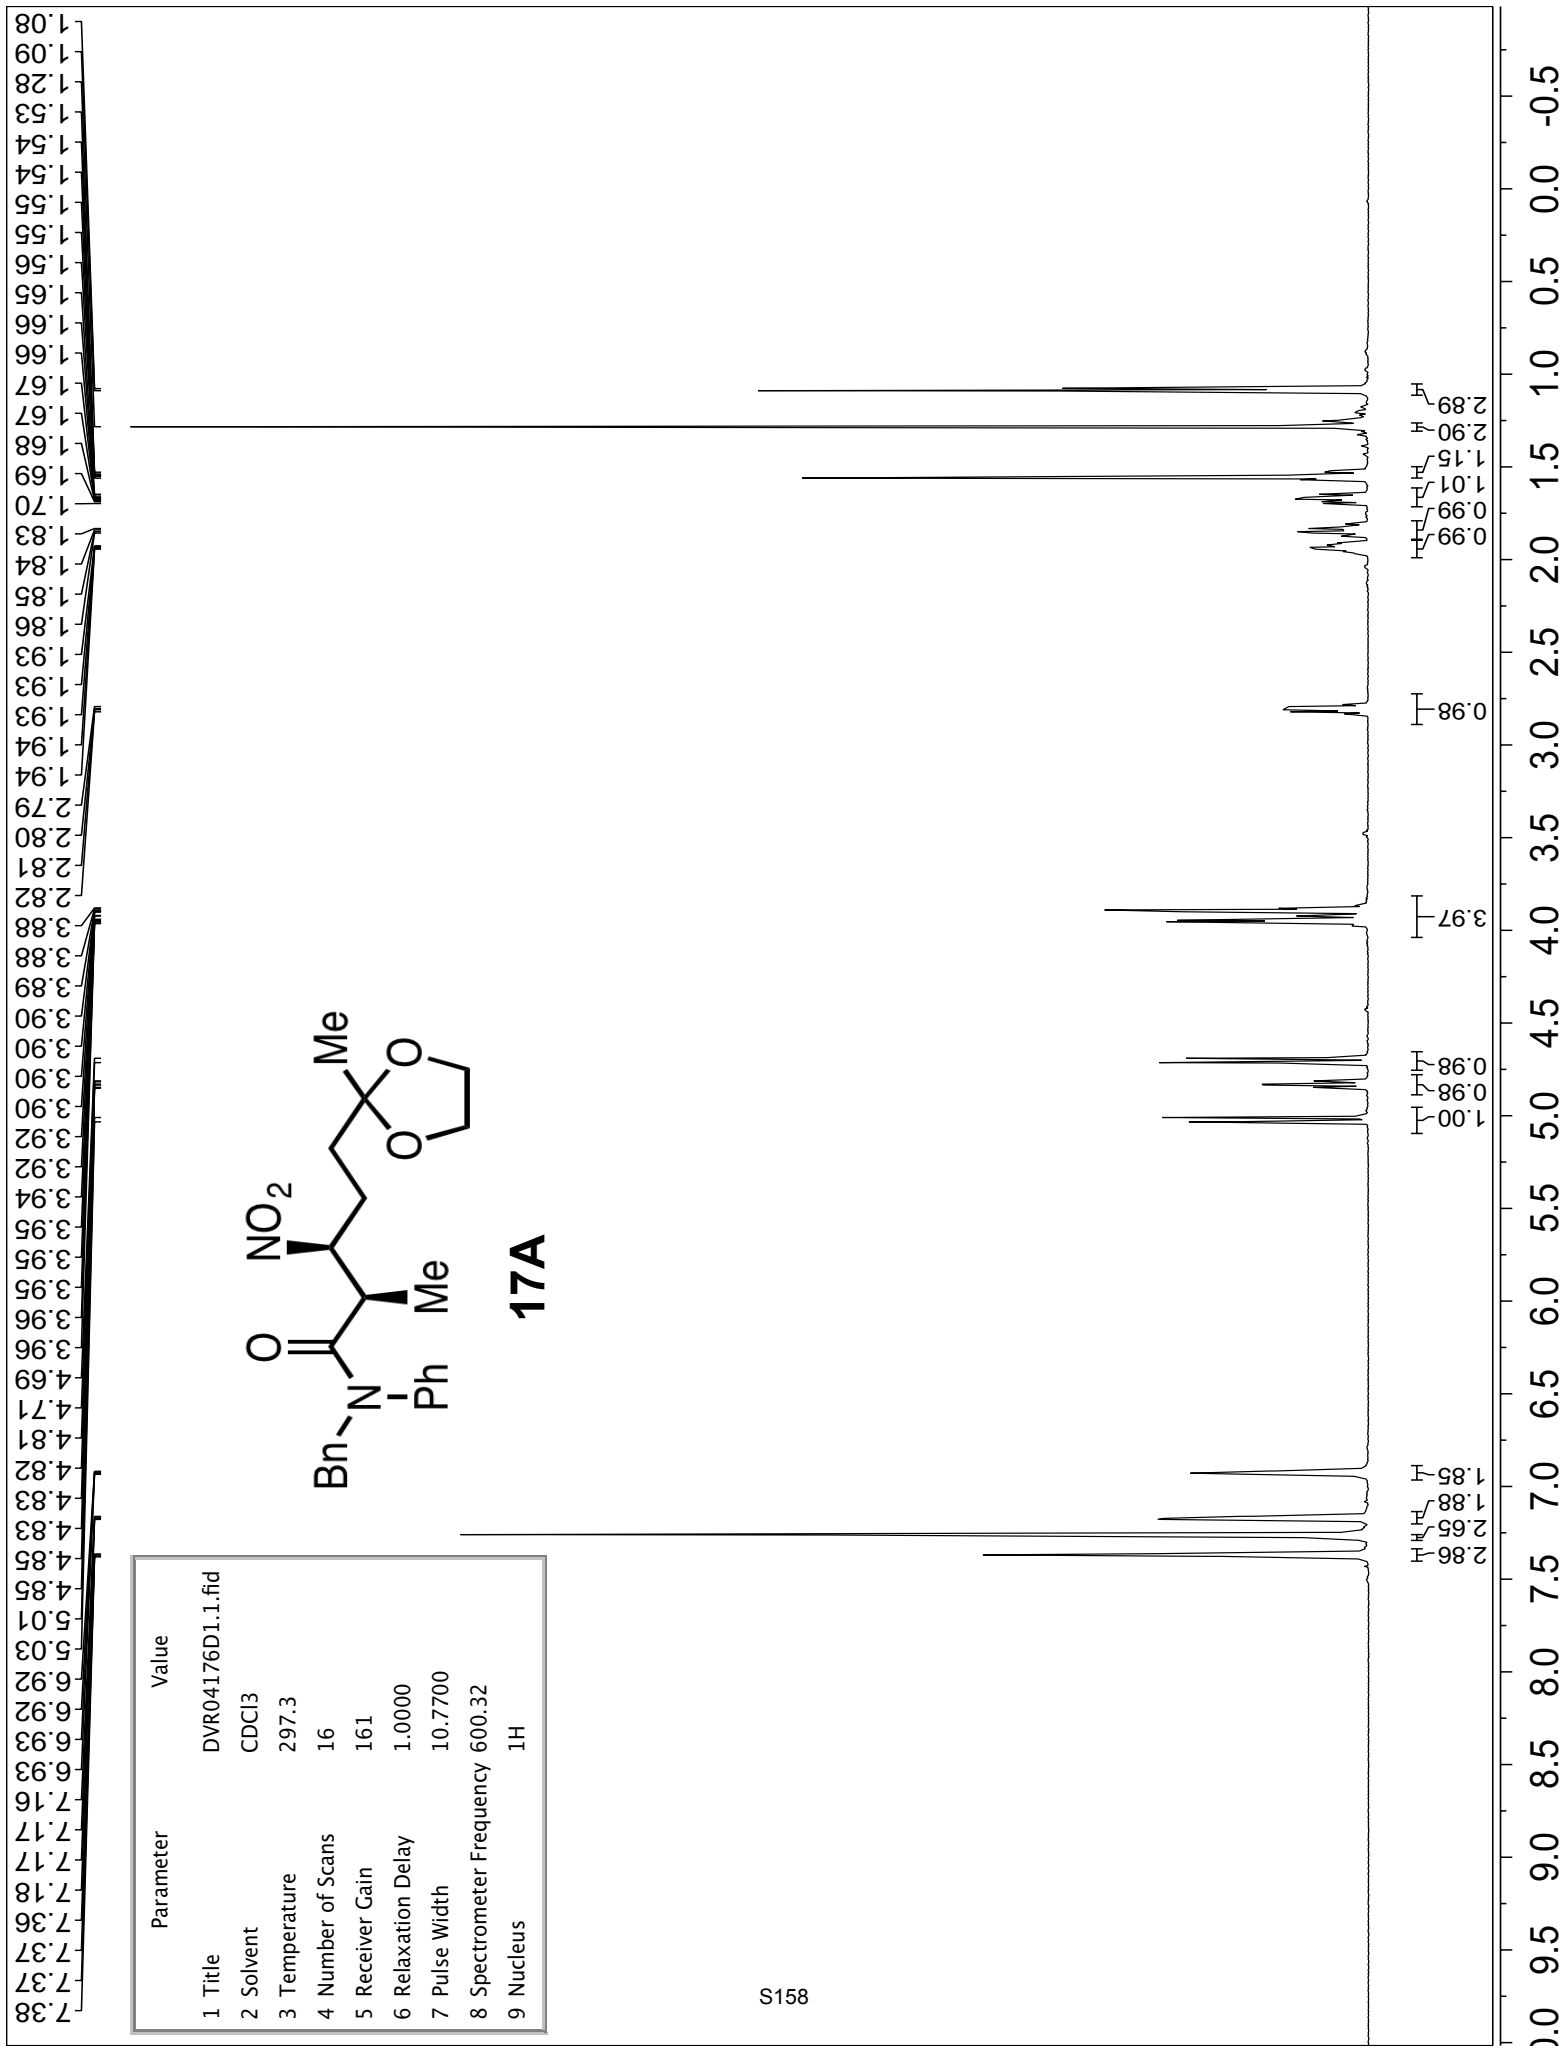

| Parameter                | Value            |
|--------------------------|------------------|
| 1 Title                  | DVR04176D1.1.fid |
| 2 Solvent                | CDCl3            |
| 3 Temperature            | 297.3            |
| 4 Number of Scans        | 16               |
| 5 Receiver Gain          | 161              |
| 6 Relaxation Delay       | 1.0000           |
| 7 Pulse Width            | 10.7700          |
| 8 Spectrometer Frequency | 600.32           |
| 9 Nucleus                | 1H               |

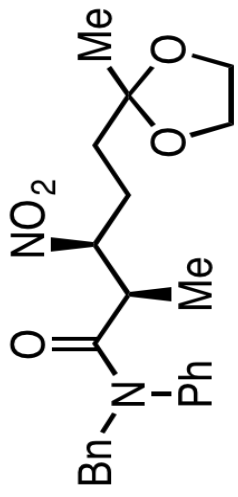

**17A**

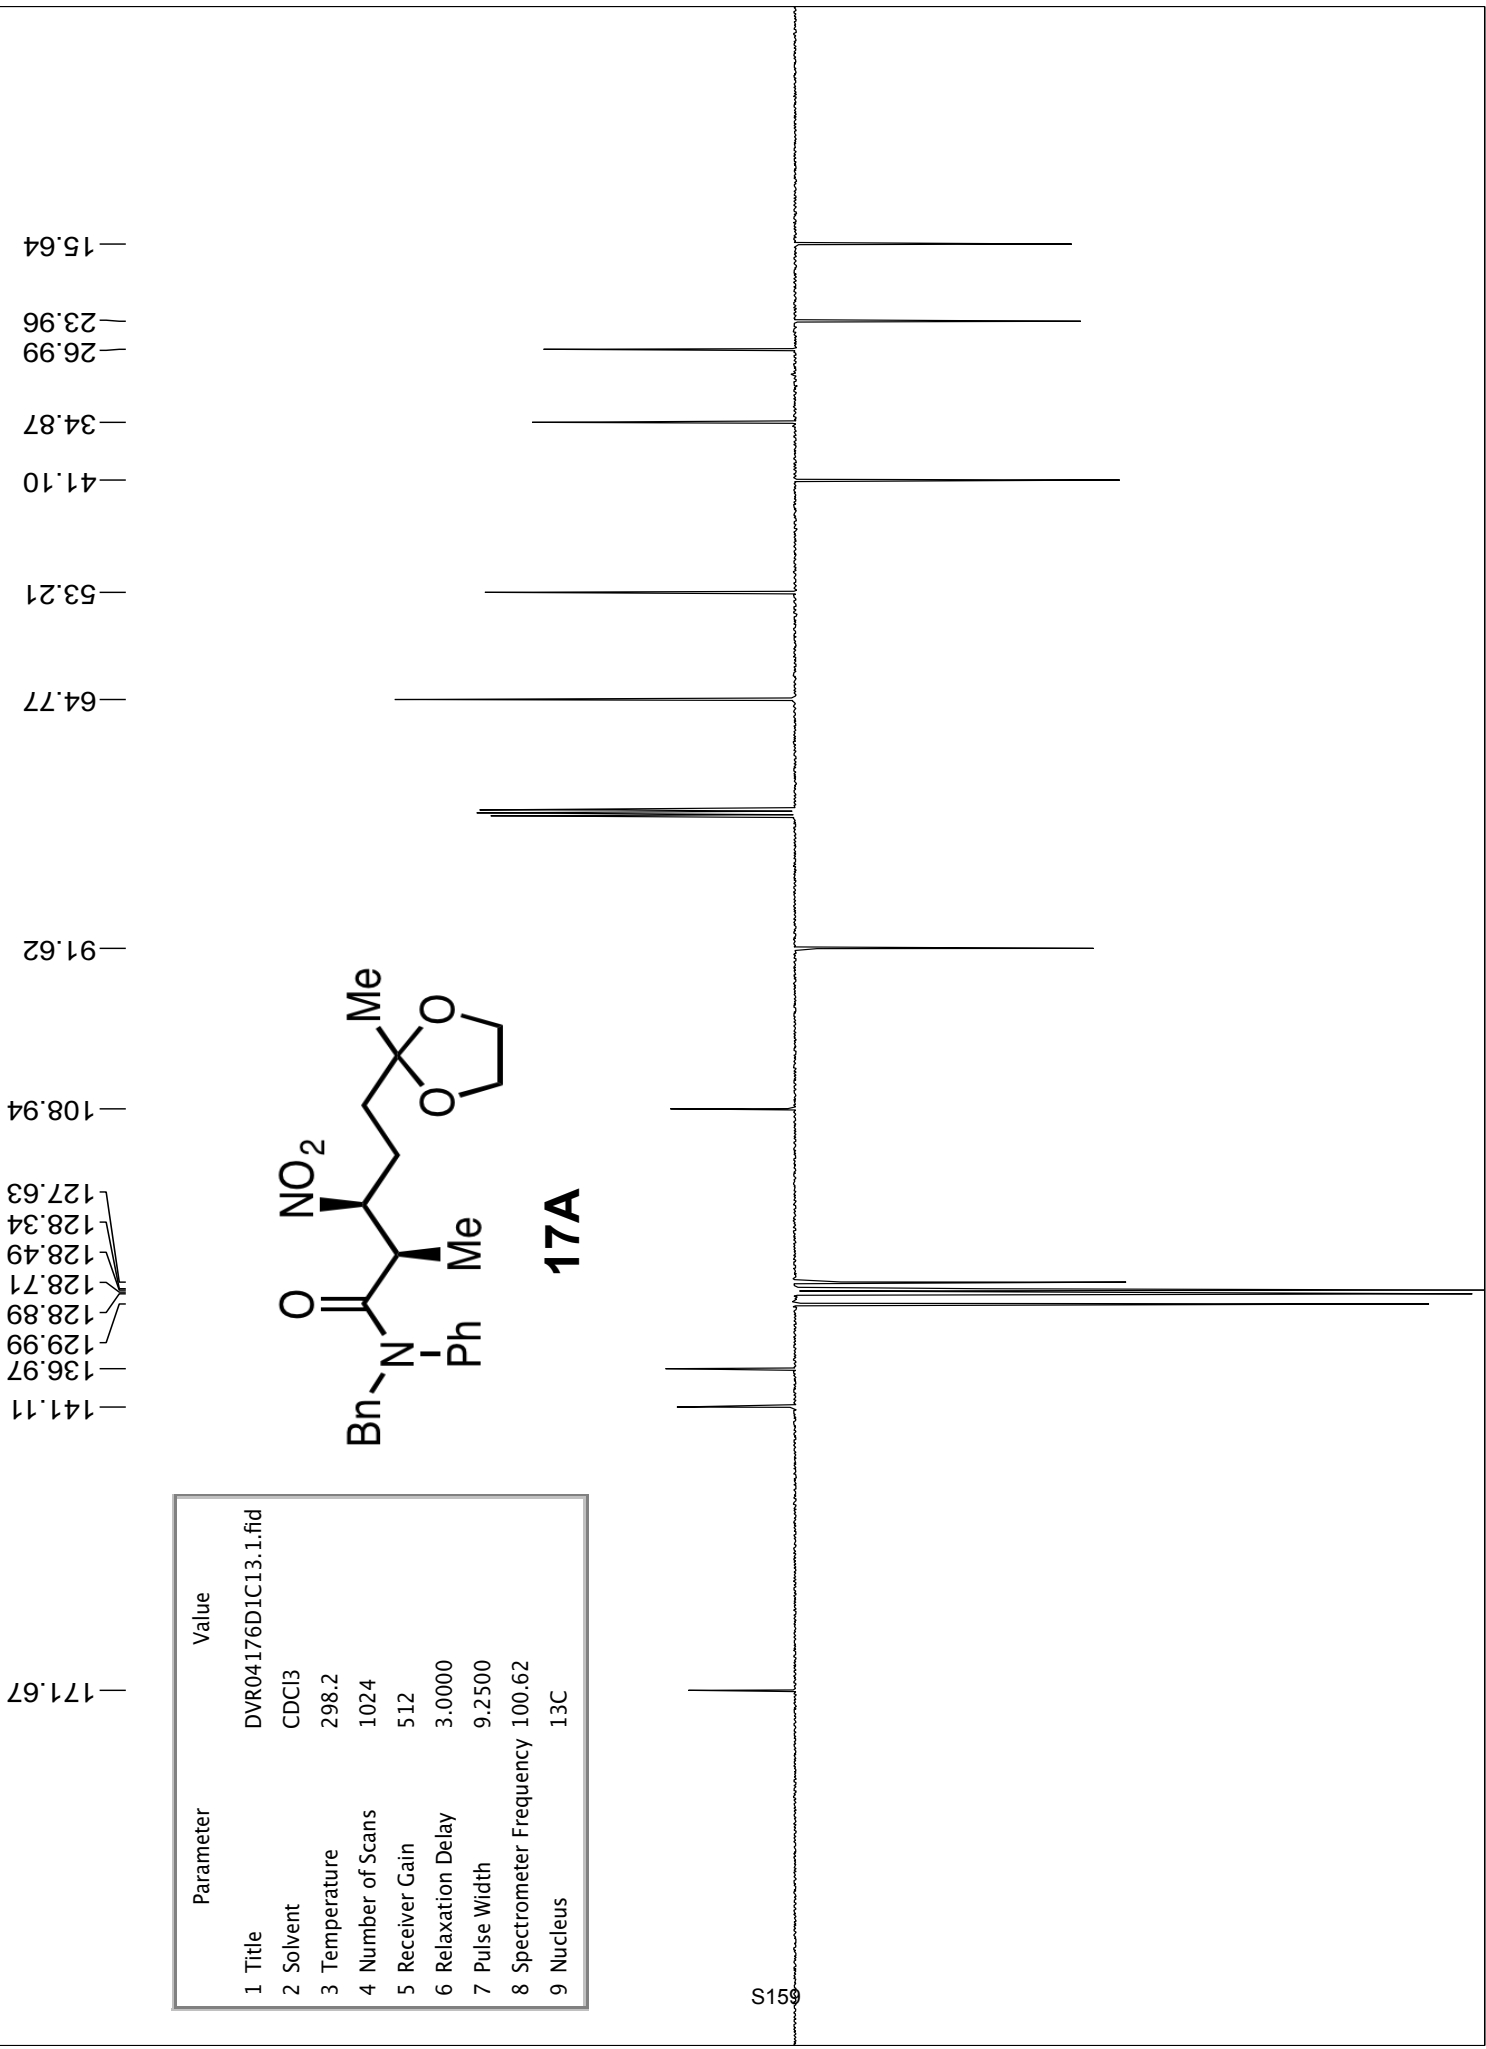

| Parameter                | Value               |
|--------------------------|---------------------|
| 1 Title                  | DVR04176D1C13.1.fid |
| 2 Solvent                | CDCl3               |
| 3 Temperature            | 298.2               |
| 4 Number of Scans        | 1024                |
| 5 Receiver Gain          | 512                 |
| 6 Relaxation Delay       | 3.0000              |
| 7 Pulse Width            | 9.2500              |
| 8 Spectrometer Frequency | 100.62              |
| 9 Nucleus                | 13C                 |

| Parameter                | Value              |
|--------------------------|--------------------|
| 1 Title                  | DVR04176D2-2.1.fid |
| 2 Solvent                | CDCl3              |
| 3 Temperature            | 297.4              |
| 4 Number of Scans        | 16                 |
| 5 Receiver Gain          | 181                |
| 6 Relaxation Delay       | 1.0000             |
| 7 Pulse Width            | 10.7700            |
| 8 Spectrometer Frequency | 600.32             |
| 9 Nucleus                | <sup>1</sup> H     |

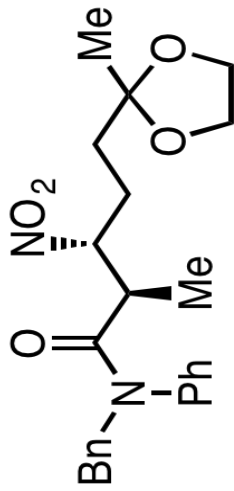

**17B**

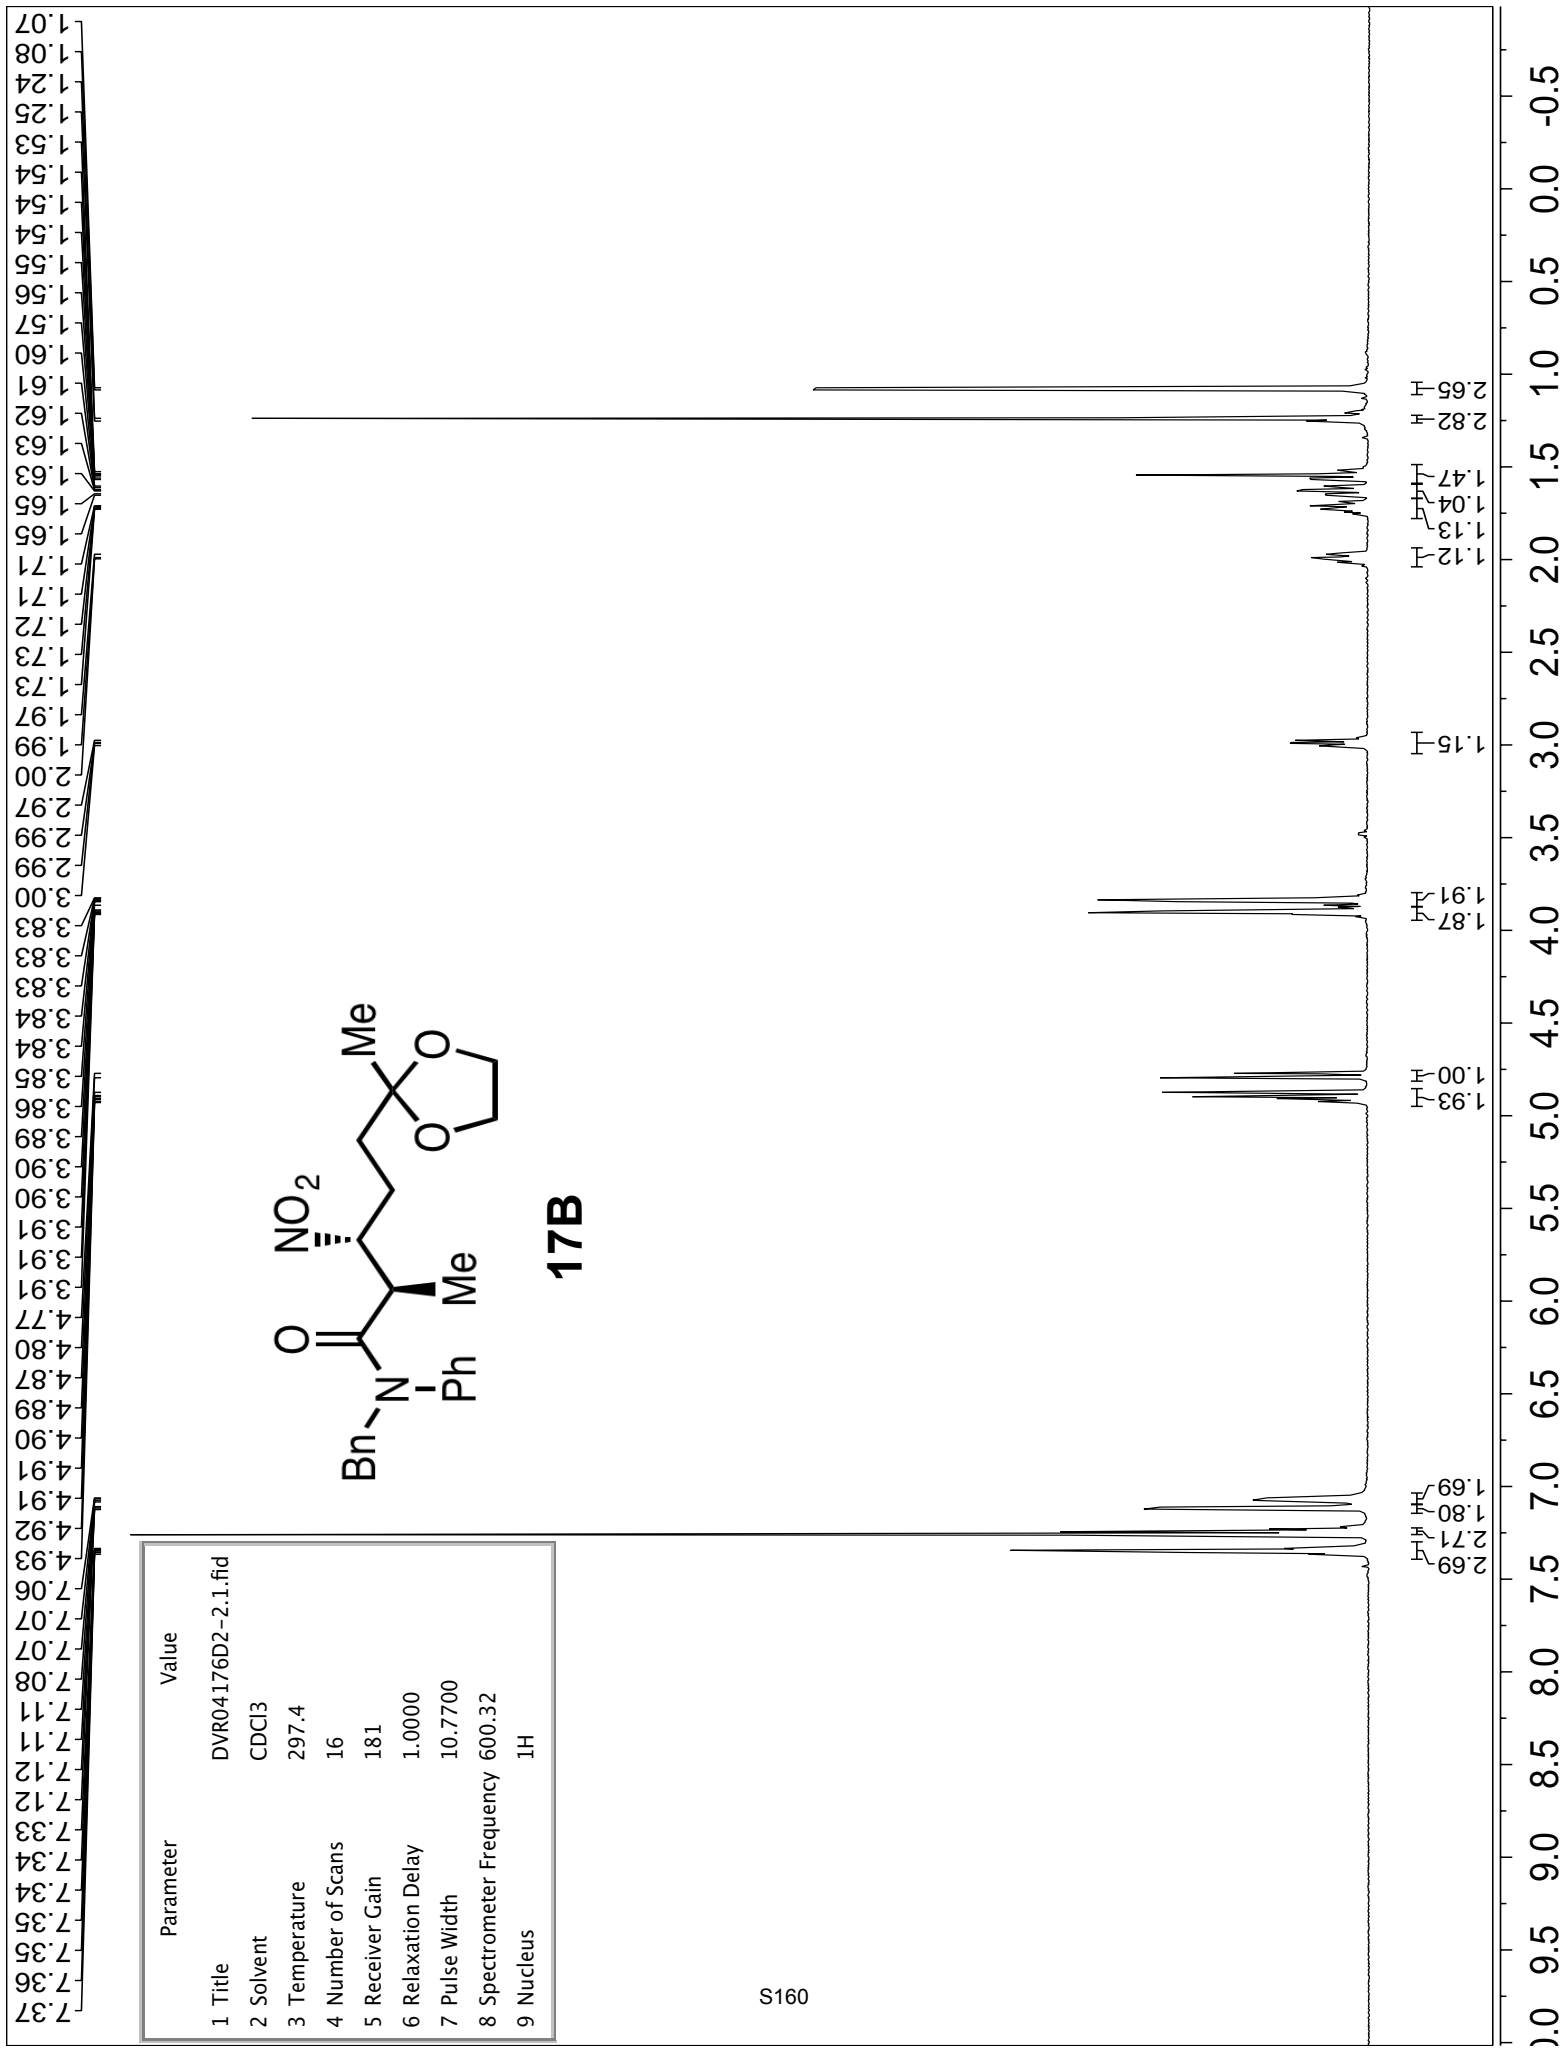

172.73  
 141.21  
 136.95  
 129.62  
 128.66  
 128.53  
 128.38  
 128.35  
 127.39  
 108.87  
 89.28  
 64.62  
 53.10  
 39.77  
 34.23  
 25.12  
 23.82  
 14.55

| Parameter                | Value                  |
|--------------------------|------------------------|
| 1 Title                  | DVR04176D2-2CI13.1.fid |
| 2 Solvent                | CDCl3                  |
| 3 Temperature            | 298.2                  |
| 4 Number of Scans        | 1024                   |
| 5 Receiver Gain          | 512                    |
| 6 Relaxation Delay       | 3.0000                 |
| 7 Pulse Width            | 9.2500                 |
| 8 Spectrometer Frequency | 100.62                 |
| 9 Nucleus                | 13C                    |

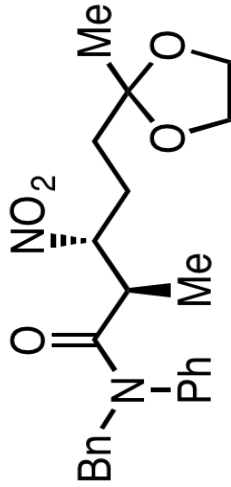

**17B**

191

200 190 180 170 160 150 140 130 120 110 100 90 80 70 60 50 40 30 20 10 0 -1

7.36  
7.35  
7.35  
7.35  
7.34  
7.34  
7.27  
7.27  
7.27  
7.27  
7.26  
7.26  
7.26  
7.26  
7.26  
7.26  
7.26  
7.27  
7.27  
7.27  
7.27  
7.24  
7.18  
7.17  
7.16  
7.16  
7.16  
7.16  
7.11  
7.10  
7.09  
4.99  
4.98  
4.97  
4.95  
4.82  
4.80  
4.18  
4.16  
4.16  
3.20  
3.20  
3.19  
3.19  
3.18  
3.18  
3.17  
3.16  
3.16  
3.15  
3.15  
1.06  
1.05

| Parameter                | Value            |
|--------------------------|------------------|
| 1 Title                  | DVR04216D1.1.fid |
| 2 Solvent                | CDCI3            |
| 3 Temperature            | 297.2            |
| 4 Number of Scans        | 16               |
| 5 Receiver Gain          | 203              |
| 6 Relaxation Delay       | 1.0000           |
| 7 Pulse Width            | 10.7700          |
| 8 Spectrometer Frequency | 600.32           |
| 9 Nucleus                | <sup>1</sup> H   |

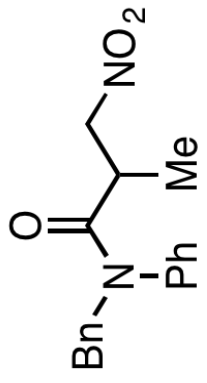

**18**

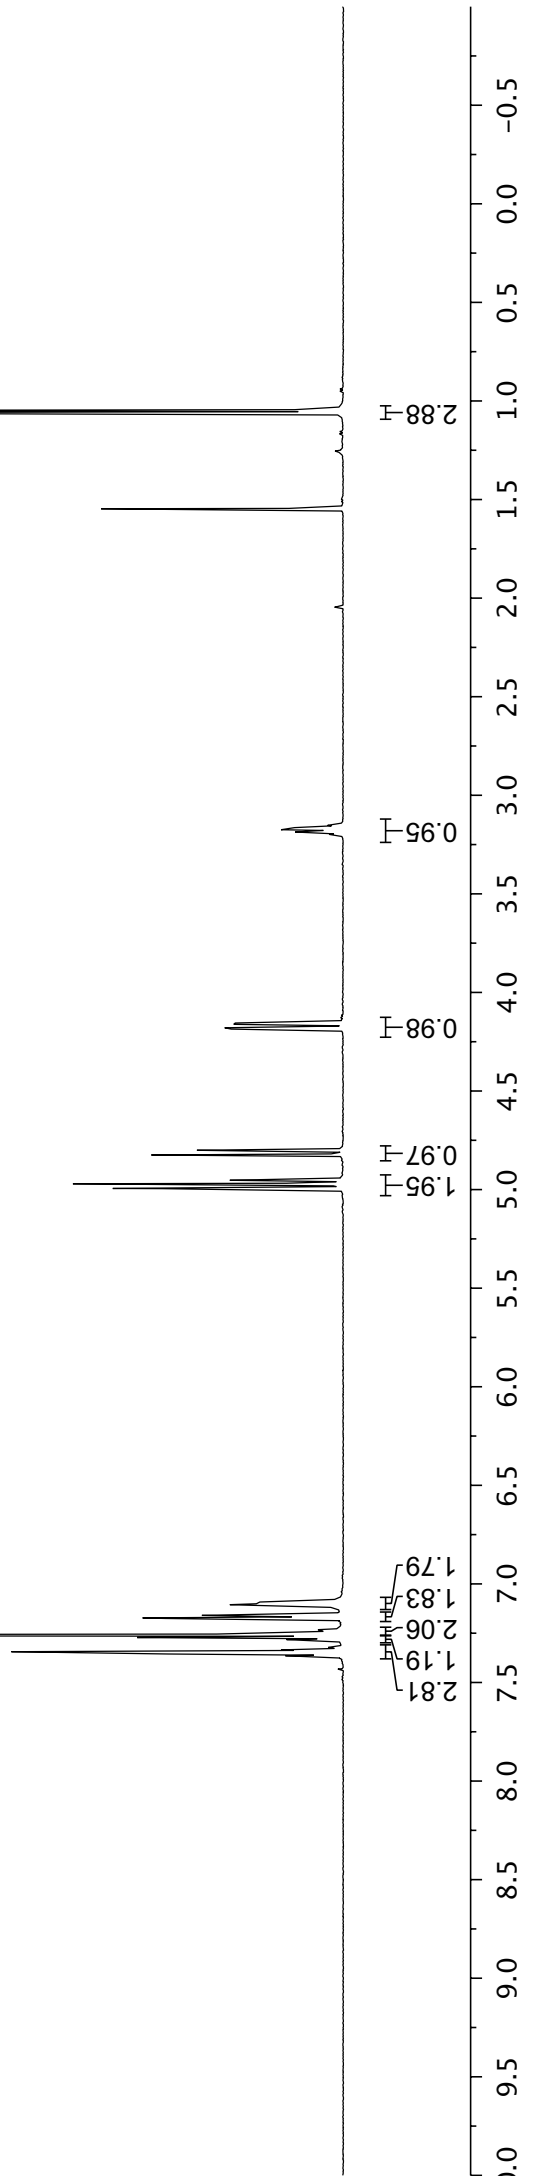



141.25  
136.96  
129.67  
128.65  
128.58  
128.42  
128.41  
127.44

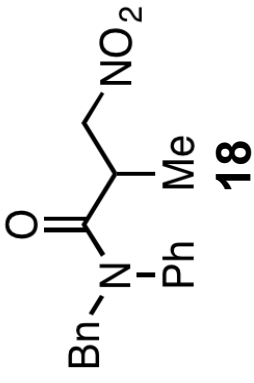

| Parameter                | Value           |
|--------------------------|-----------------|
| 1 Title                  | DVR04216A.2.fid |
| 2 Solvent                | CDCl3           |
| 3 Temperature            | 298.9           |
| 4 Number of Scans        | 1024            |
| 5 Receiver Gain          | 2050            |
| 6 Relaxation Delay       | 5.0000          |
| 7 Pulse Width            | 10.6300         |
| 8 Spectrometer Frequency | 150.97          |
| 9 Nucleus                | 13C             |

76.67  
53.29  
35.07  
14.95

172.48

395

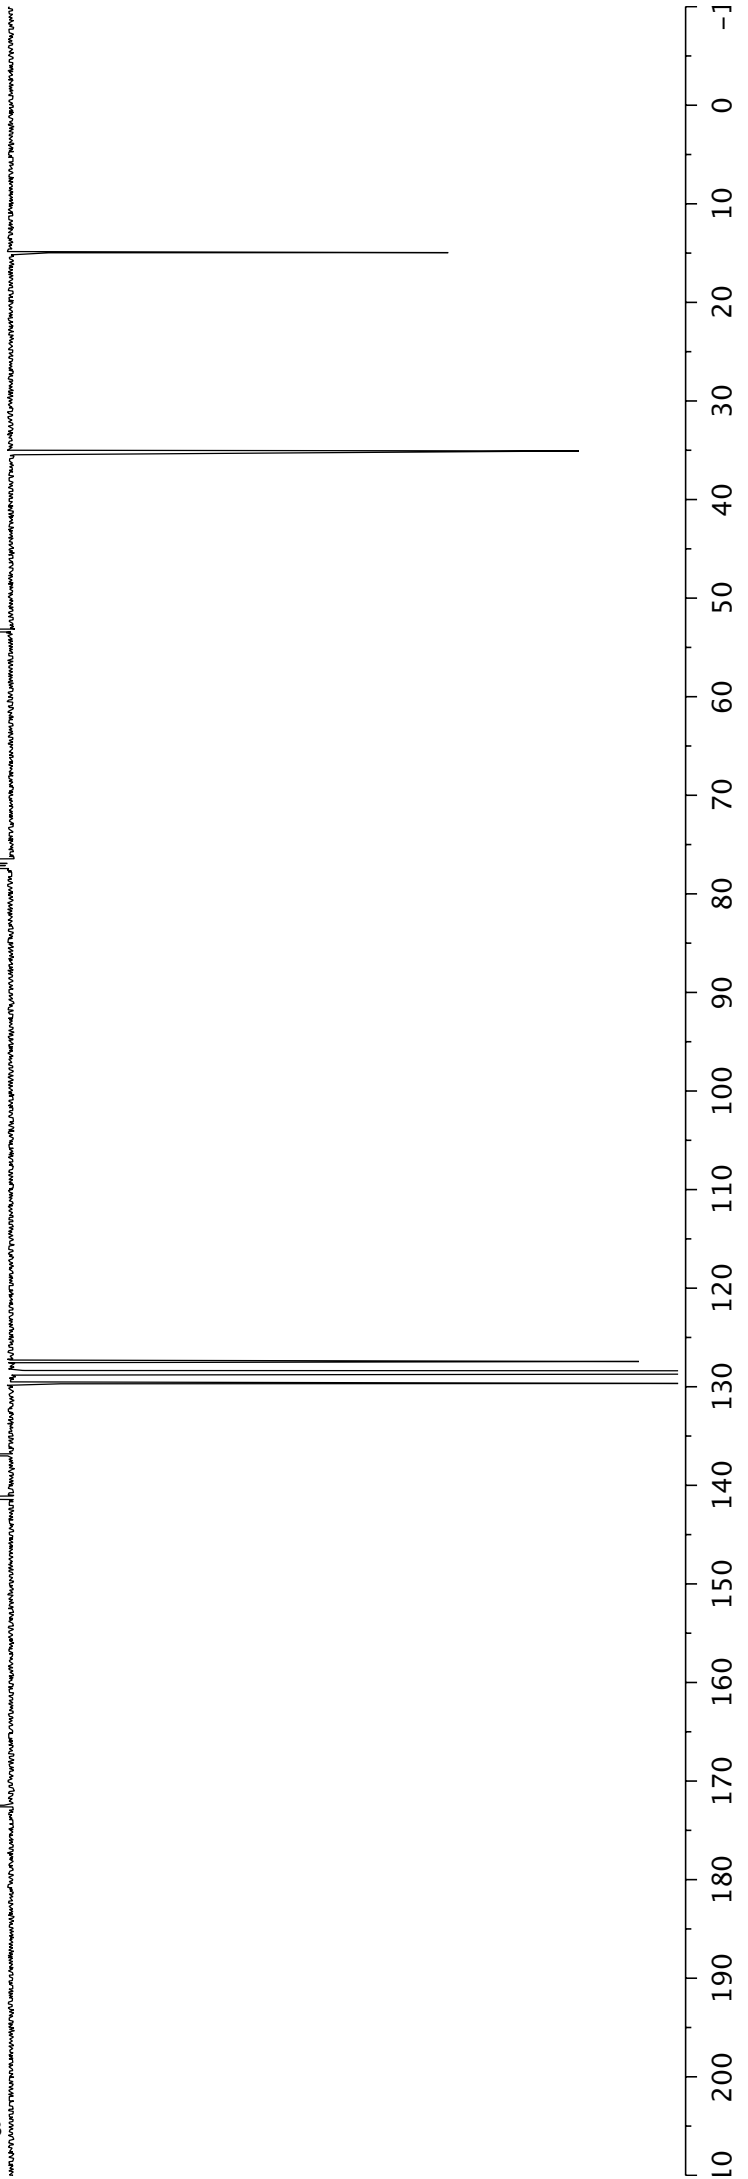

Parameter Value

1 Title DVR04203CRD.1.fid  
2 Solvent CDCl3  
3 Temperature 300.0  
4 Number of Scans 16  
5 Receiver Gain 114  
6 Relaxation Delay 1.0000  
7 Pulse Width 10.7700  
8 Spectrometer Frequency 600.32  
9 Nucleus 1H

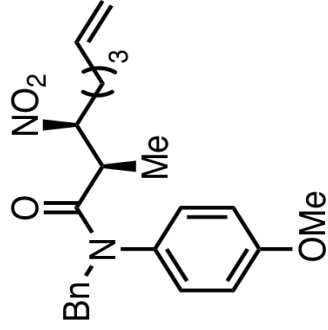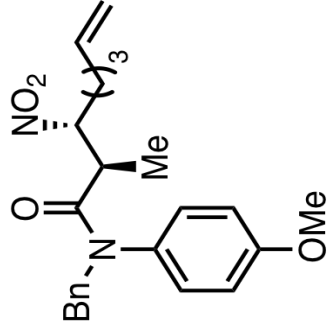

Crude

82:12

19B

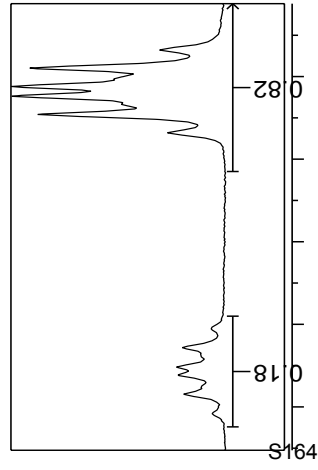

3.05 3.00 2.95 2.90 2.85

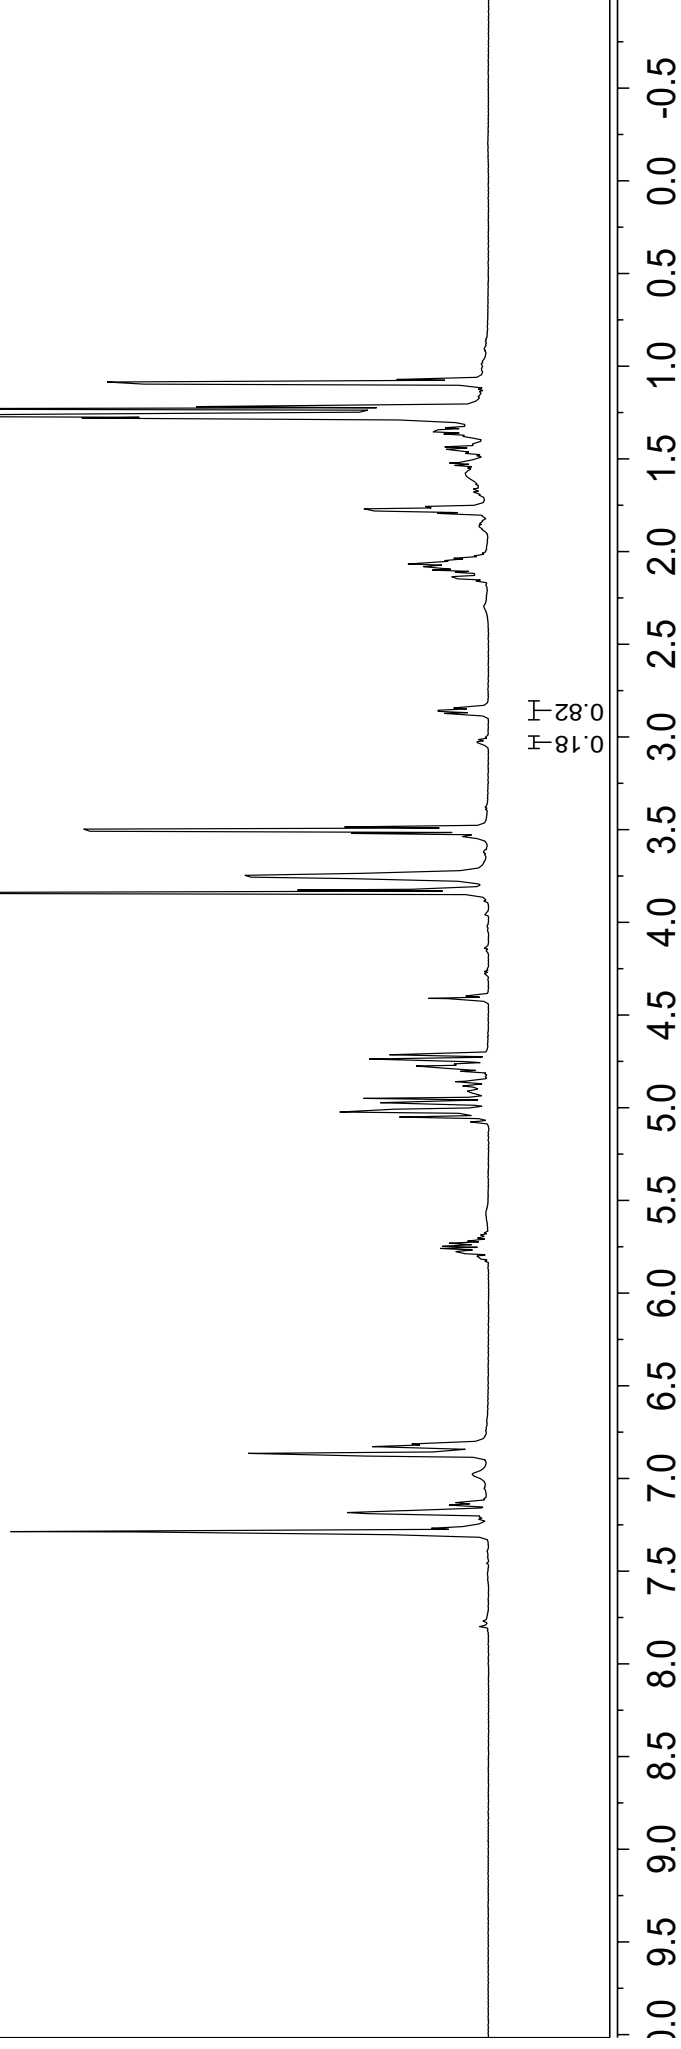

7.28  
7.28  
7.27  
7.27  
7.26  
7.17  
7.16  
7.16  
7.16  
7.15  
6.86  
6.85  
6.84  
6.84  
6.81  
6.79  
6.79  
5.74  
5.72  
5.71  
5.03  
5.03  
5.00  
5.00  
5.00  
5.00  
4.99  
4.99  
4.98  
4.98  
4.95  
4.93  
4.77  
4.76  
4.76  
4.75  
4.71  
4.69  
3.82  
2.85  
2.84  
2.82  
2.08  
2.08  
2.07  
2.06  
2.06  
2.05  
2.05  
2.04  
1.77  
1.76  
1.76  
1.76  
1.75  
1.74  
1.73  
1.42  
1.41  
1.33  
1.07  
1.06

| Parameter                | Value            |
|--------------------------|------------------|
| 1 Title                  | DVR04203D1.1.fid |
| 2 Solvent                | CDCl3            |
| 3 Temperature            | 300.0            |
| 4 Number of Scans        | 16               |
| 5 Receiver Gain          | 161              |
| 6 Relaxation Delay       | 1.0000           |
| 7 Pulse Width            | 10.7700          |
| 8 Spectrometer Frequency | 600.32           |
| 9 Nucleus                | <sup>1</sup> H   |

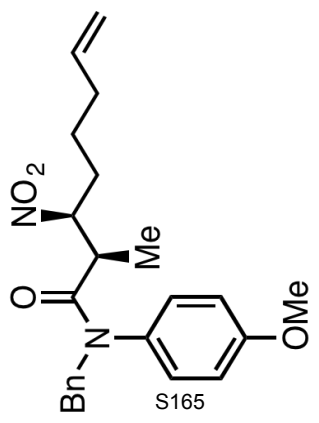

**19A**

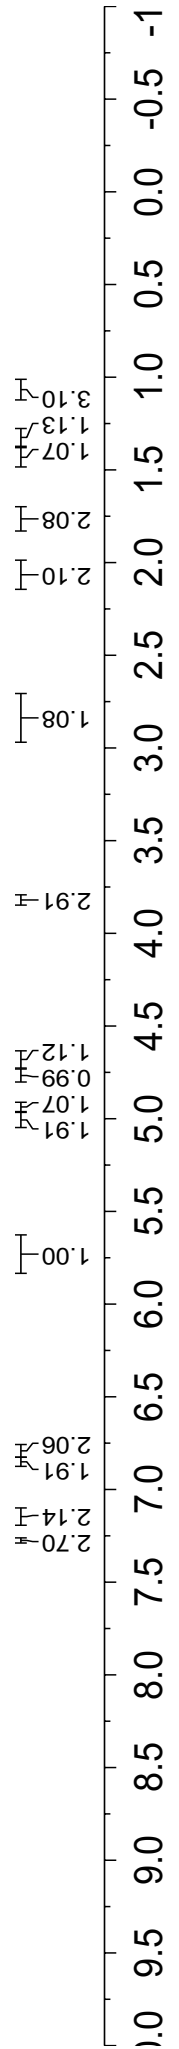

| Parameter                | Value                |
|--------------------------|----------------------|
| 1 Title                  | DVR04203D1 C13.1.fid |
| 2 Solvent                | CDCl3                |
| 3 Temperature            | 298.9                |
| 4 Number of Scans        | 1024                 |
| 5 Receiver Gain          | 2050                 |
| 6 Relaxation Delay       | 5.0000               |
| 7 Pulse Width            | 10.6300              |
| 8 Spectrometer Frequency | 150.97               |
| 9 Nucleus                | <sup>13</sup> C      |

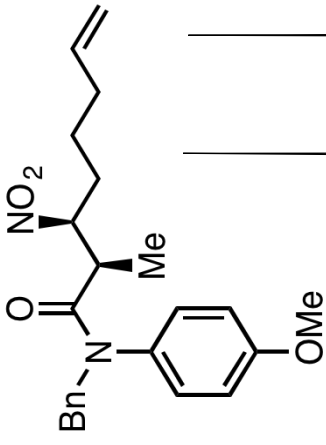

**19A**

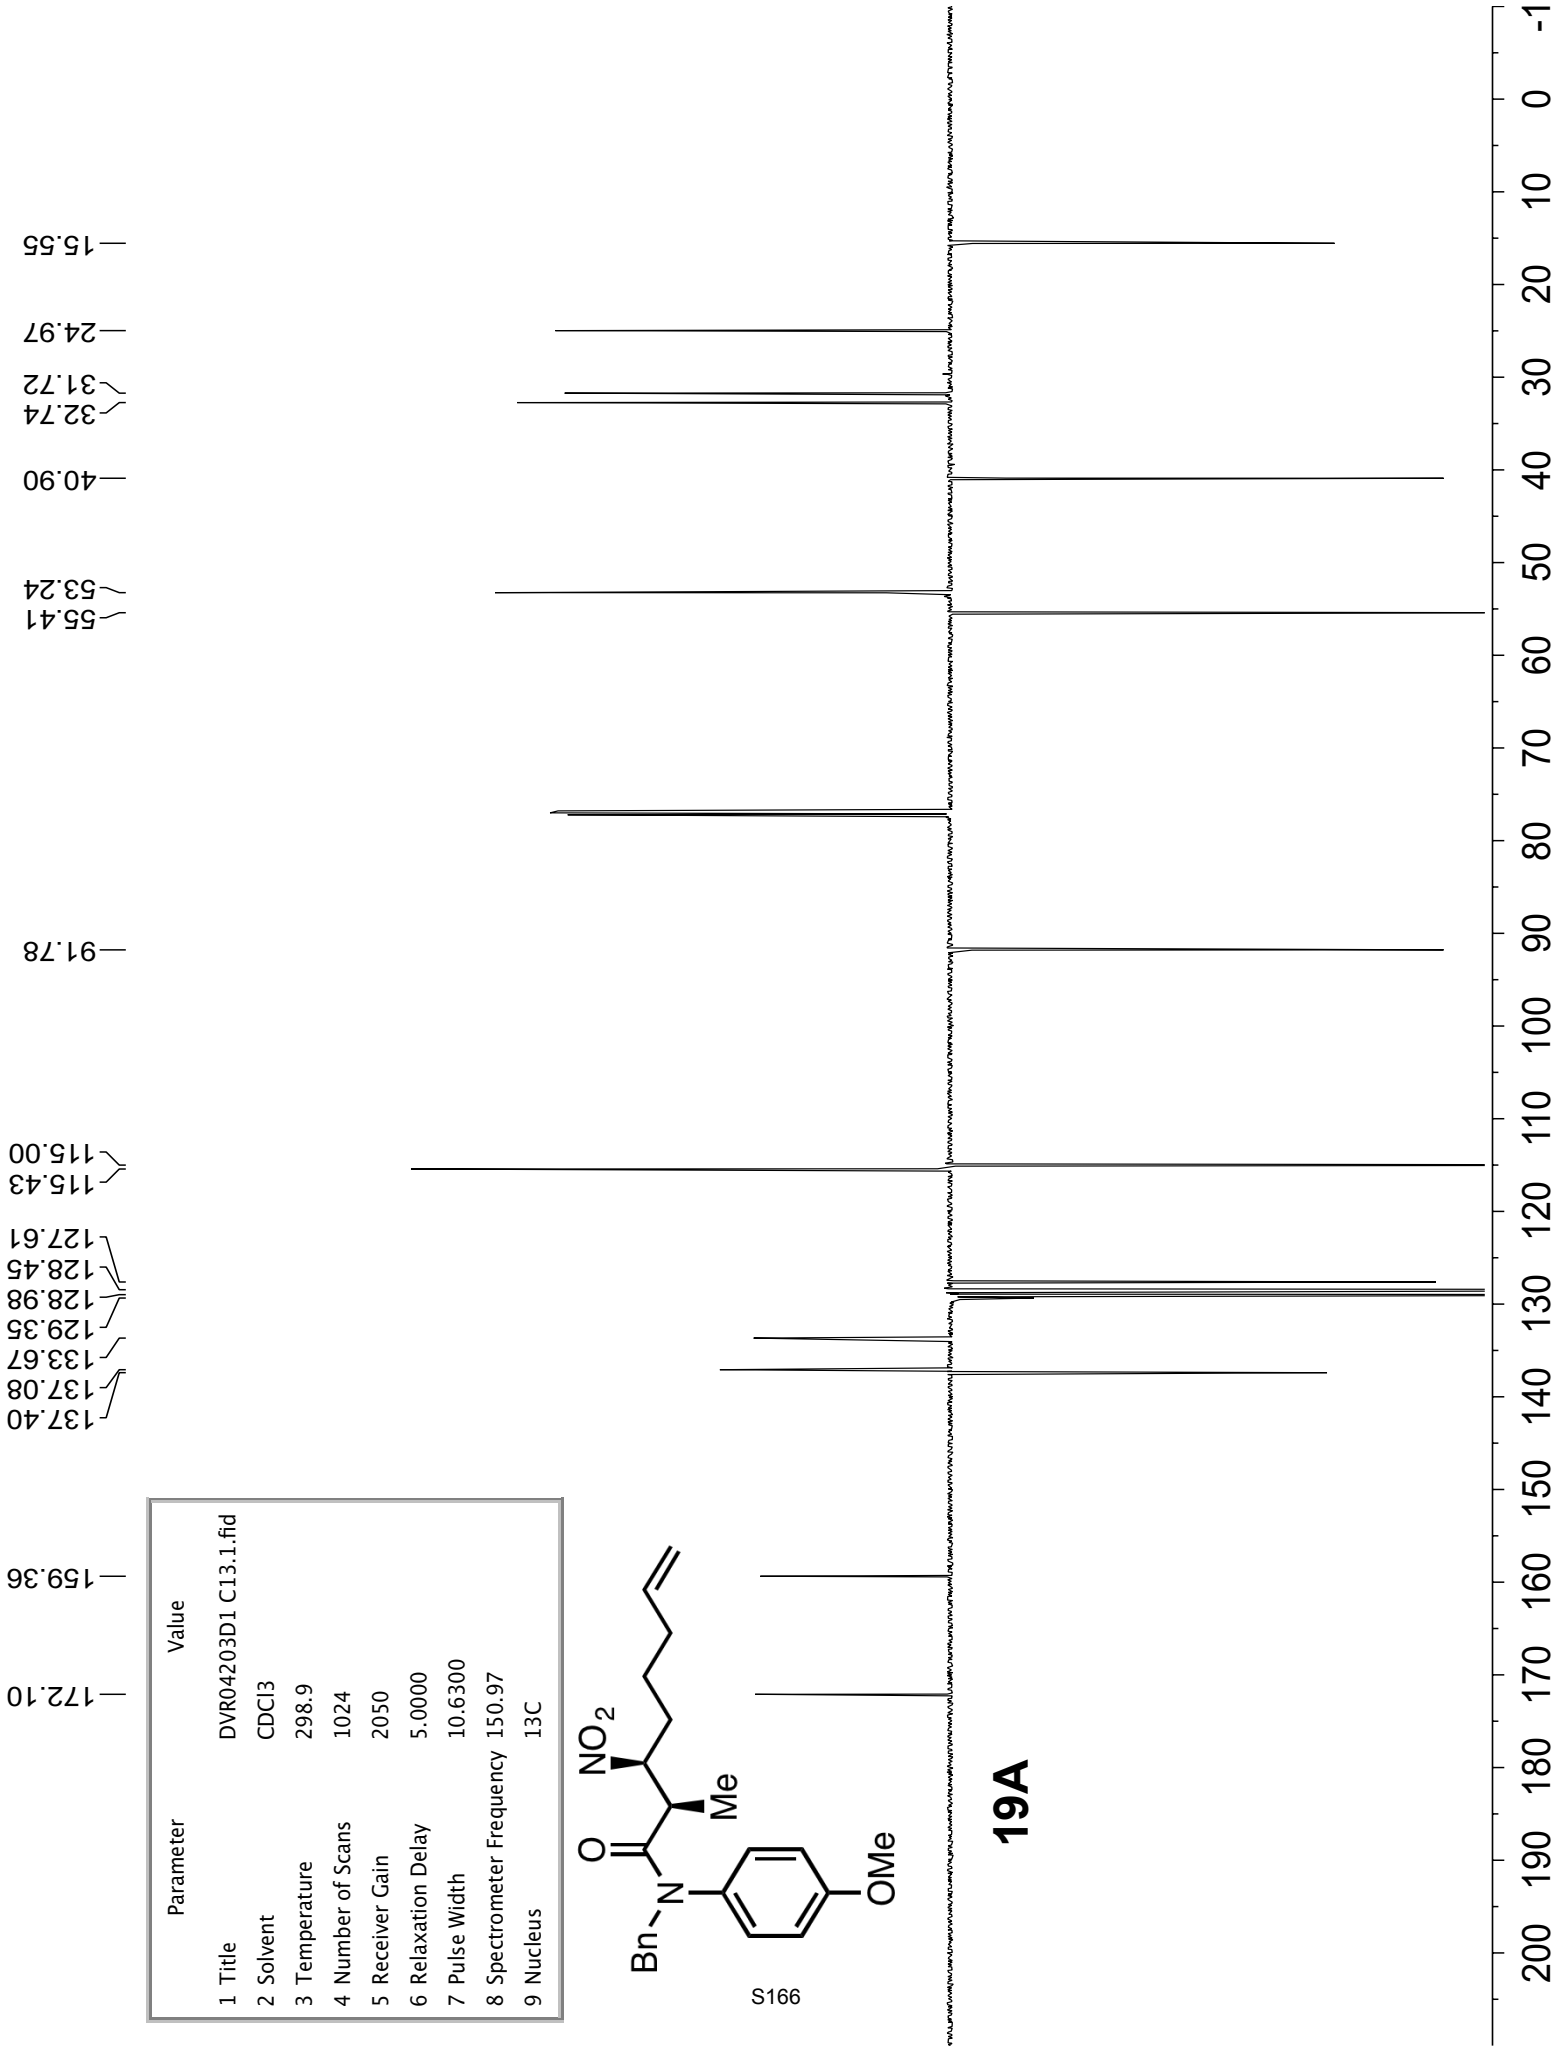

7.27  
7.26  
7.26  
7.25  
7.24  
7.24  
7.24  
7.23  
7.12  
7.12  
7.12  
7.11  
7.11  
7.11  
6.97  
6.95  
6.84  
6.84  
6.83  
6.83  
5.69  
5.68  
5.66  
4.99  
4.98  
4.98  
4.96  
4.96  
4.96  
4.95  
4.95  
4.94  
4.94  
4.89  
4.88  
4.87  
4.86  
4.86  
4.83  
4.75  
4.73  
3.80  
3.02  
3.01  
3.00  
2.99  
2.06  
2.06  
2.05  
2.04  
2.02  
2.01  
2.01  
1.66  
1.64  
1.37  
1.36  
1.36  
1.35  
1.34  
1.34  
1.33  
1.06  
1.05

| Parameter                | Value            |
|--------------------------|------------------|
| 1 Title                  | DVR04203D2.1.fid |
| 2 Solvent                | CDCl3            |
| 3 Temperature            | 300.0            |
| 4 Number of Scans        | 16               |
| 5 Receiver Gain          | 144              |
| 6 Relaxation Delay       | 1.0000           |
| 7 Pulse Width            | 10.7700          |
| 8 Spectrometer Frequency | 600.32           |
| 9 Nucleus                | <sup>1</sup> H   |

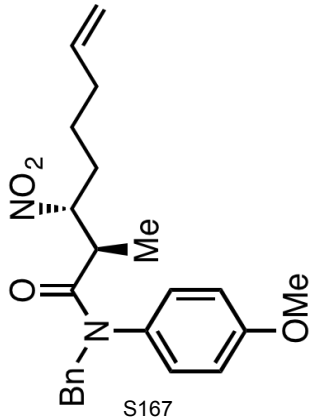

19B

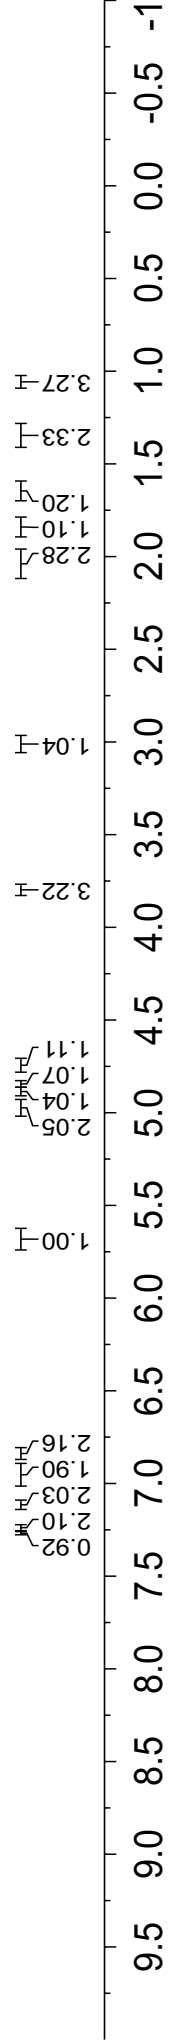

| Parameter                | Value                |
|--------------------------|----------------------|
| 1 Title                  | DVR04203D2 C13.1.fid |
| 2 Solvent                | CDCl3                |
| 3 Temperature            | 299.1                |
| 4 Number of Scans        | 1024                 |
| 5 Receiver Gain          | 2050                 |
| 6 Relaxation Delay       | 5.0000               |
| 7 Pulse Width            | 10.6300              |
| 8 Spectrometer Frequency | 150.97               |
| 9 Nucleus                | 13C                  |

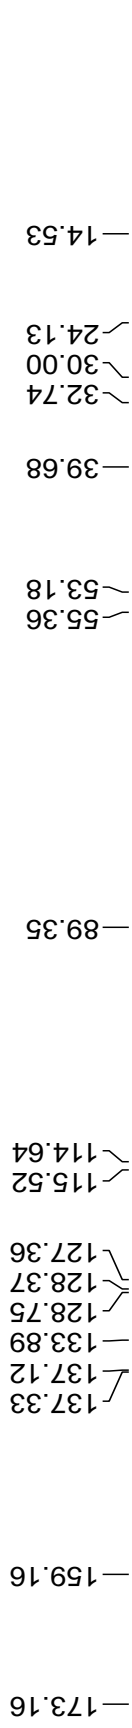

S168

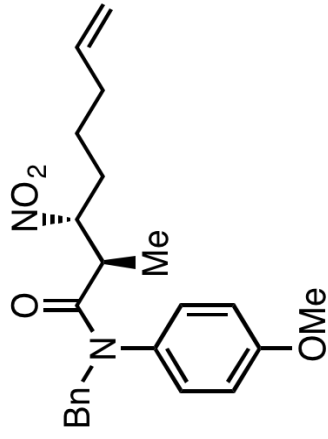

**19B**

| Parameter                | Value             |
|--------------------------|-------------------|
| 1 Title                  | DVR04211CRD.1.fid |
| 2 Solvent                | CDCl3             |
| 3 Temperature            | 298.1             |
| 4 Number of Scans        | 16                |
| 5 Receiver Gain          | 128               |
| 6 Relaxation Delay       | 1.0000            |
| 7 Pulse Width            | 10.7700           |
| 8 Spectrometer Frequency | 600.32            |
| 9 Nucleus                | <sup>1</sup> H    |

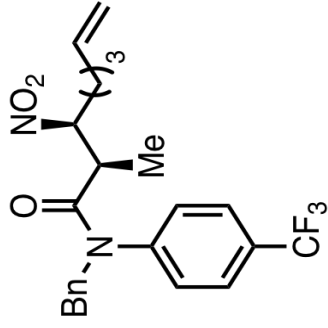

**20A**

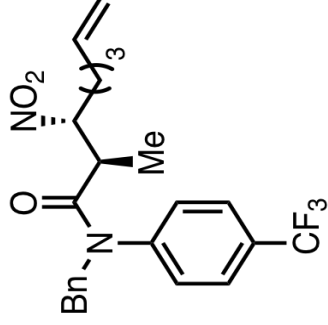

**Crude**  
**79:21**      **20B**

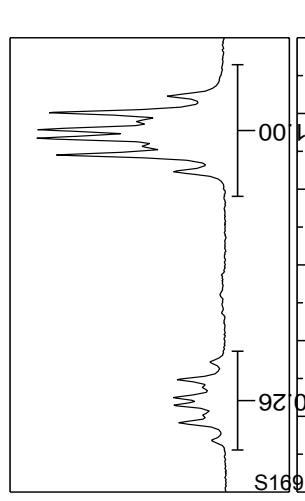

3.00 2.90 2.80 2.70

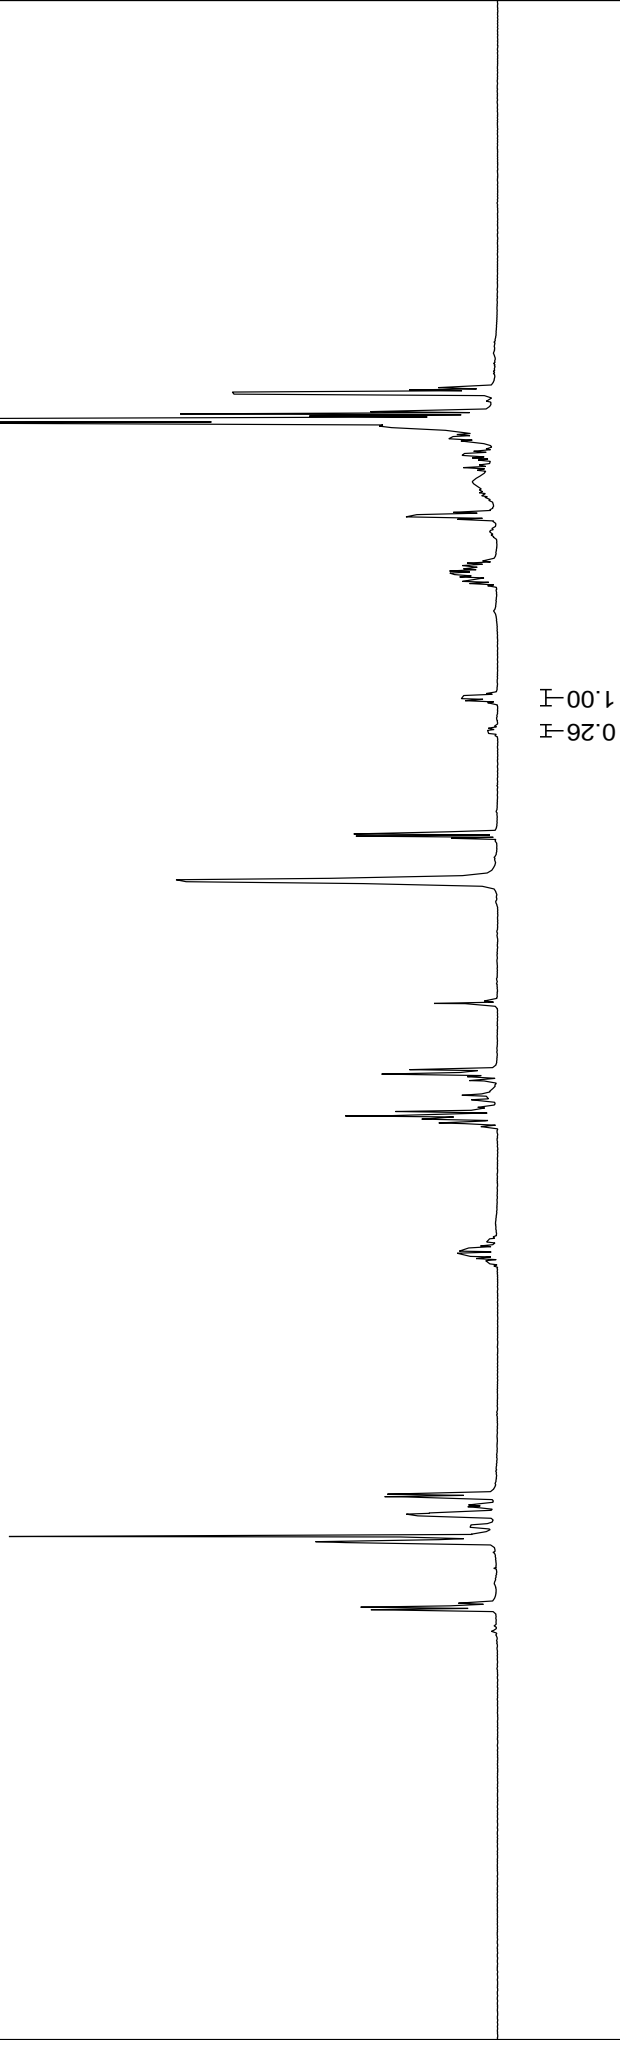

1.0 0.5 0.0 -0.5 -1.0

| Parameter                | Value            |
|--------------------------|------------------|
| 1 Title                  | DVR04211D1.1.fid |
| 2 Solvent                | CDCI3            |
| 3 Temperature            | 298.0            |
| 4 Number of Scans        | 16               |
| 5 Receiver Gain          | 161              |
| 6 Relaxation Delay       | 1.0000           |
| 7 Pulse Width            | 10.7700          |
| 8 Spectrometer Frequency | 600.32           |
| 9 Nucleus                | <sup>1</sup> H   |

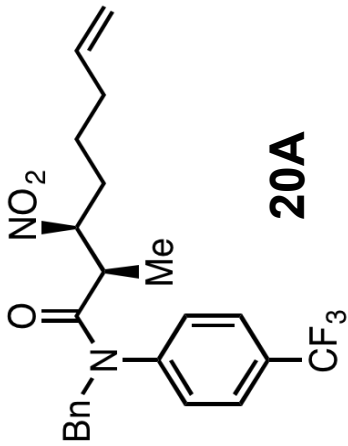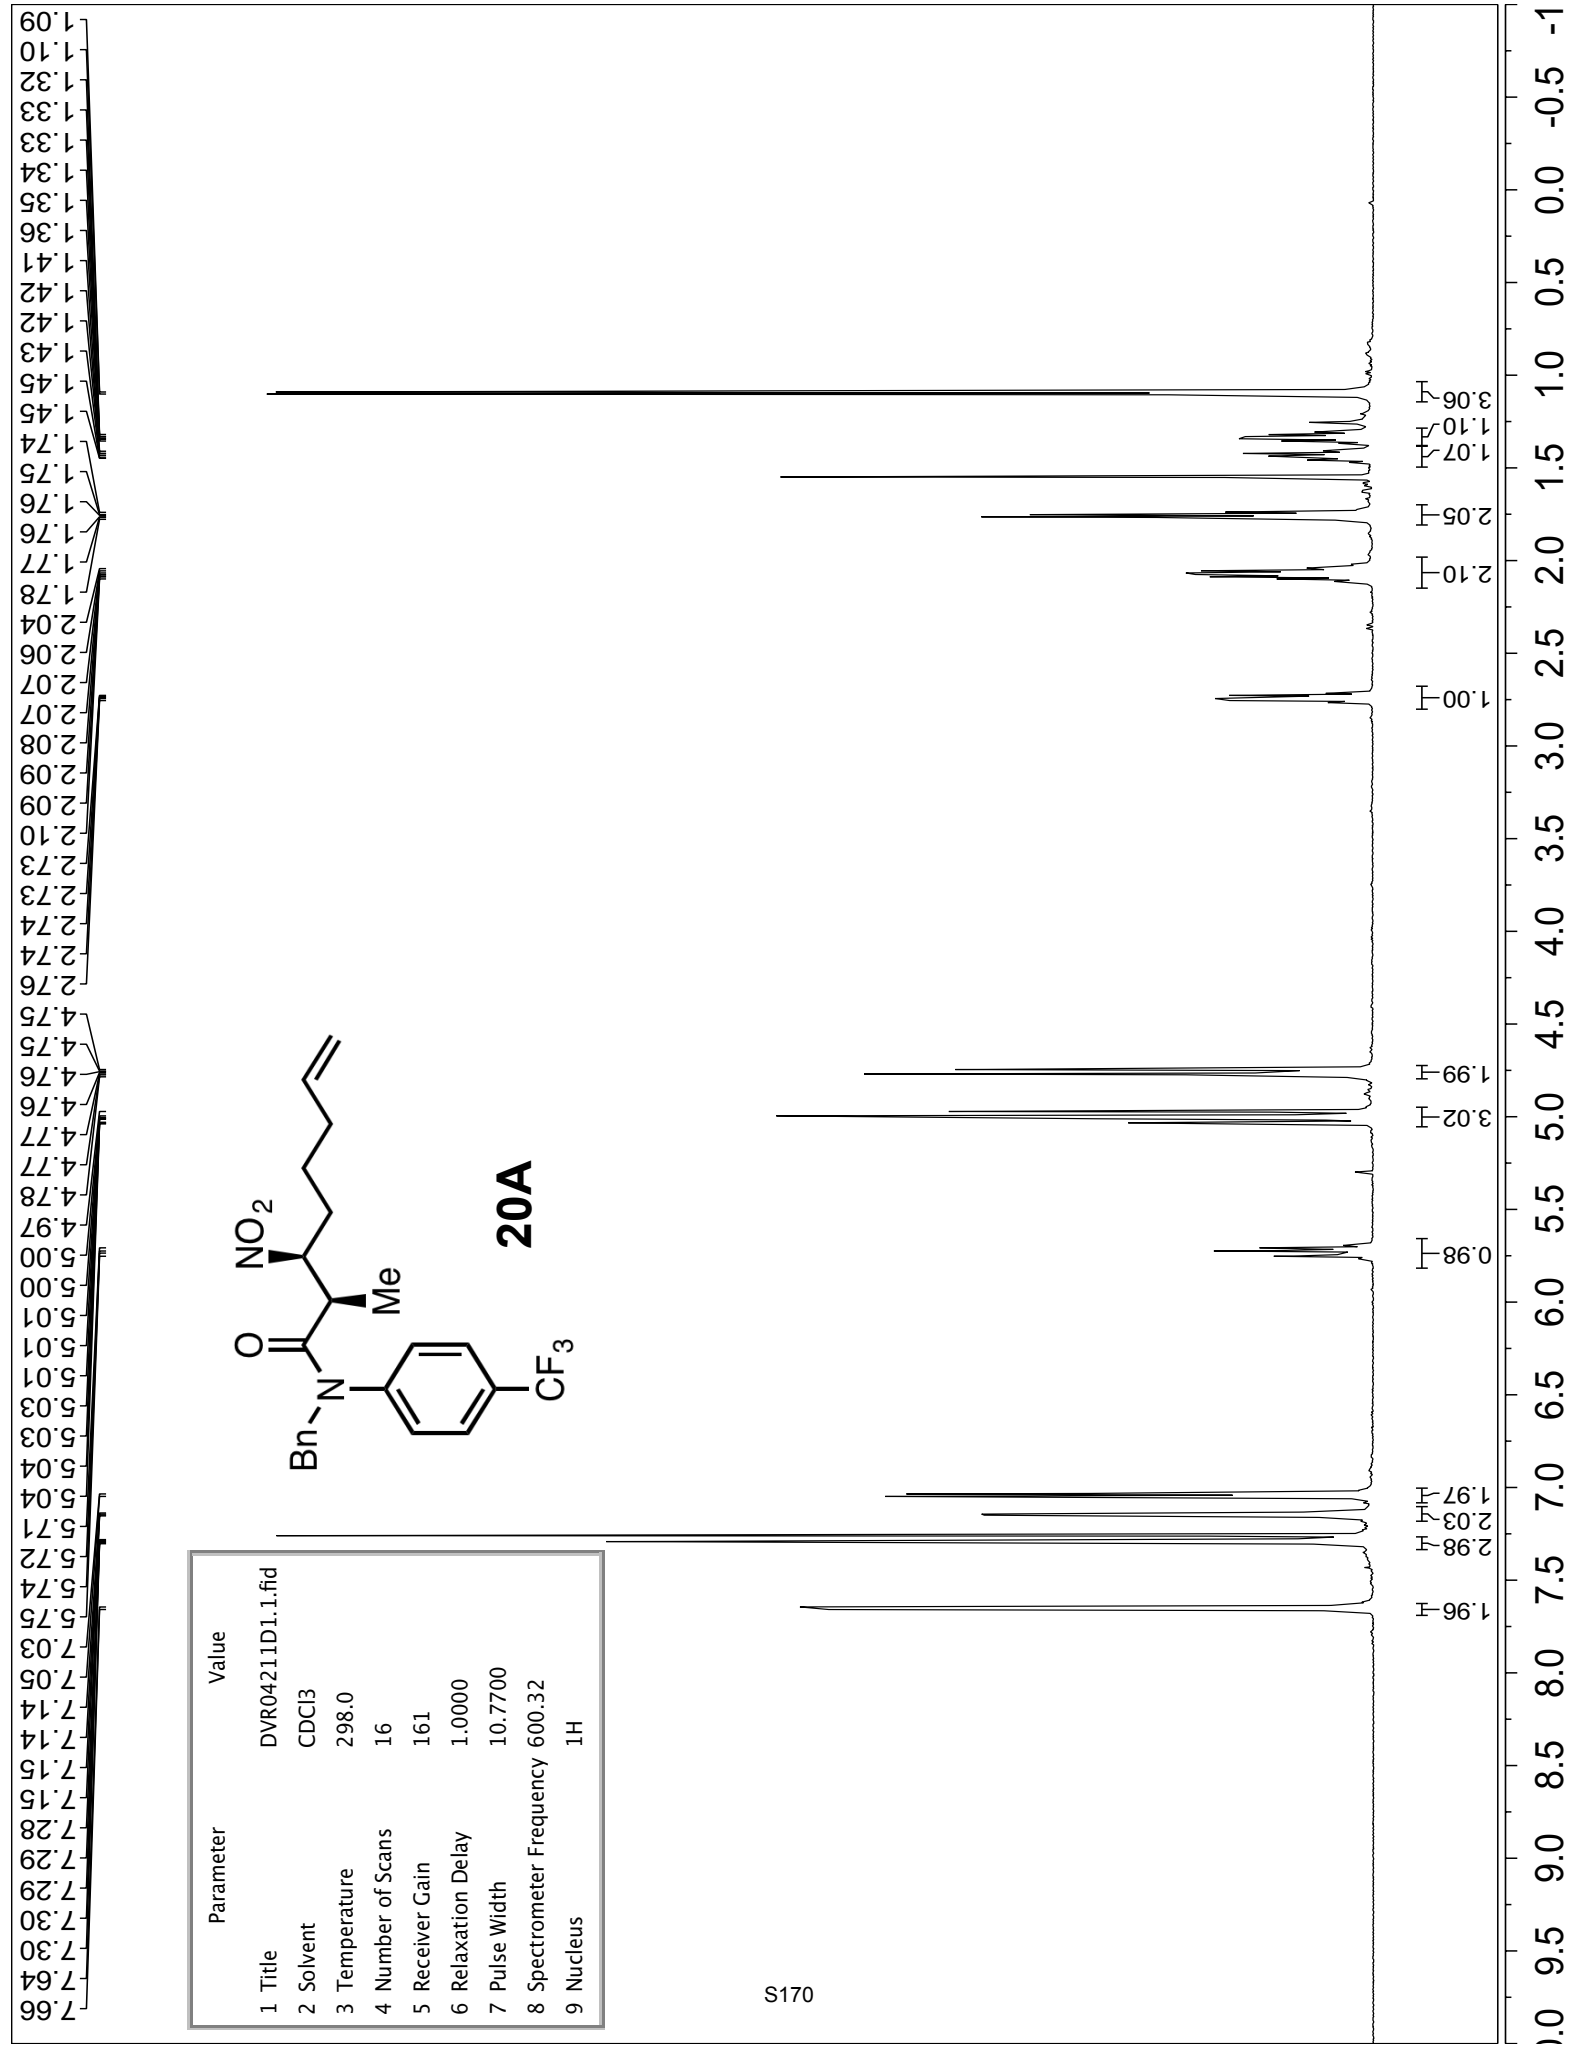



171.38  
144.32  
137.35  
136.44  
131.29  
131.08  
130.86  
130.64  
128.99  
128.90  
128.72  
128.02  
127.29  
127.24  
126.19  
124.38  
122.58  
120.77  
115.58  
91.53

| Parameter                | Value                 |
|--------------------------|-----------------------|
| 1 Title                  | DVR04211 D1 C13.1.fid |
| 2 Solvent                | CDC13                 |
| 3 Temperature            | 298.0                 |
| 4 Number of Scans        | 1024                  |
| 5 Receiver Gain          | 2050                  |
| 6 Relaxation Delay       | 5.0000                |
| 7 Pulse Width            | 10.6300               |
| 8 Spectrometer Frequency | 150.97                |
| 9 Nucleus                | <sup>13</sup> C       |

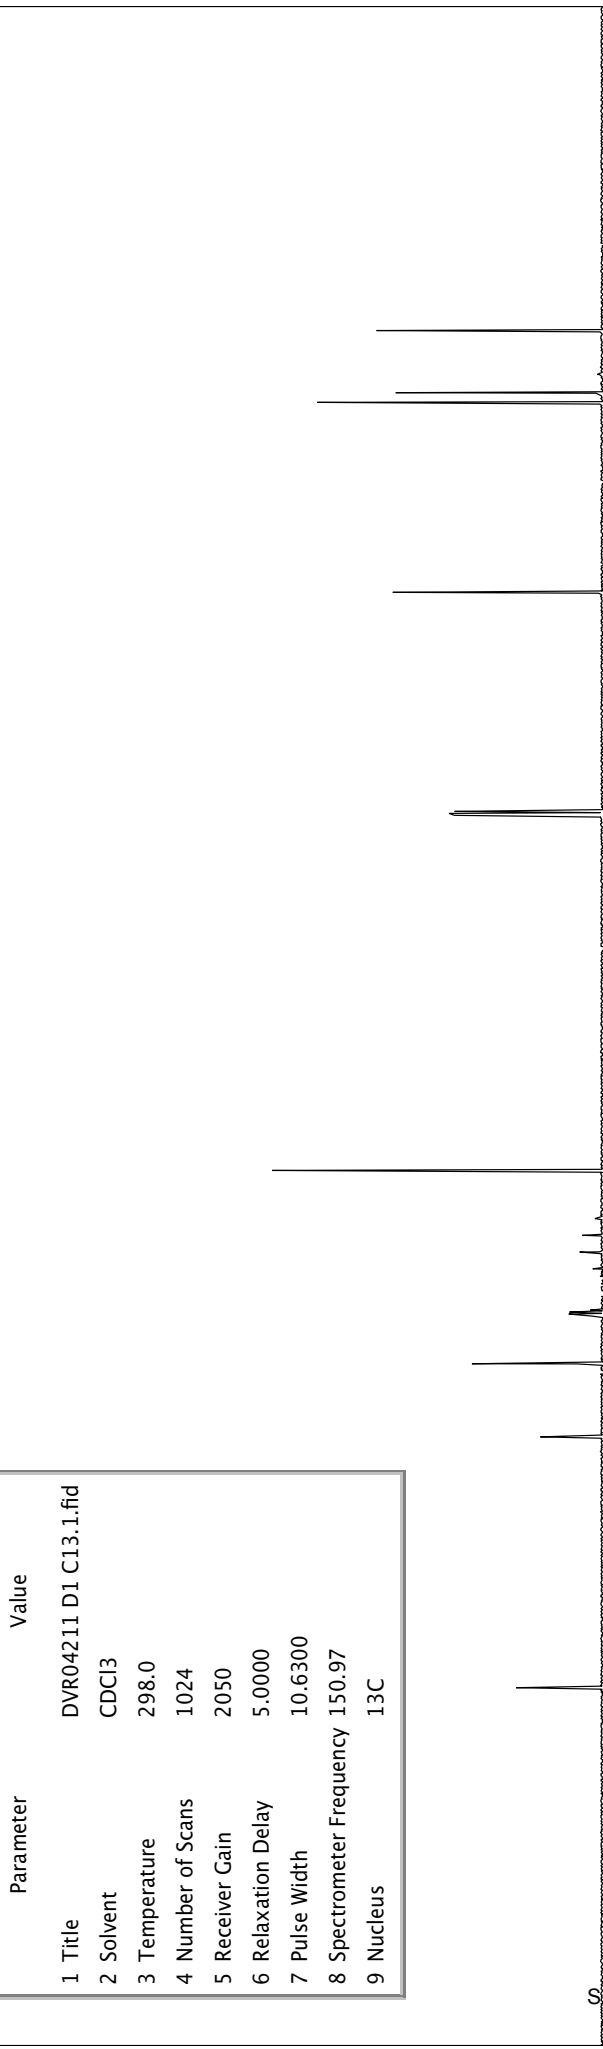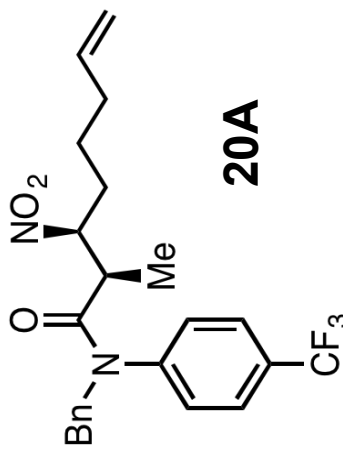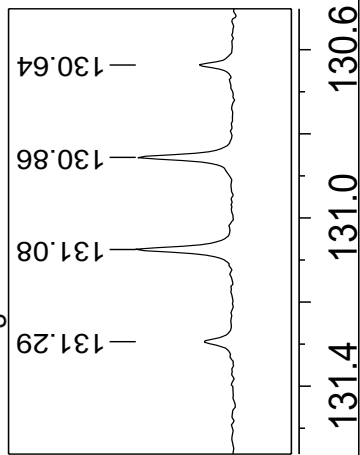

10 200 190 180 170 160 150 140 130 120 110 100 90 80 70 60 50 40 30 20 10 0 -1

—62.68

| Parameter                | Value                |
|--------------------------|----------------------|
| 1 Title                  | DVR04211D1 F19.1.fid |
| 2 Solvent                | CDCI3                |
| 3 Temperature            | 298.0                |
| 4 Number of Scans        | 16                   |
| 5 Receiver Gain          | 406                  |
| 6 Relaxation Delay       | 3.0000               |
| 7 Pulse Width            | 11.6200              |
| 8 Spectrometer Frequency | 564.81               |
| 9 Nucleus                | 19F                  |

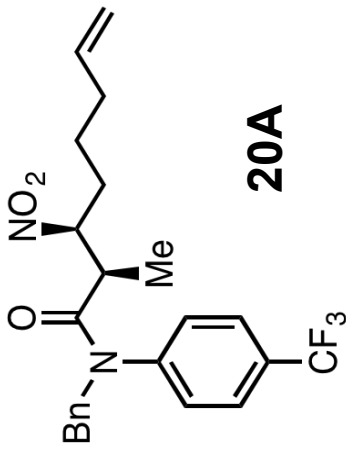

**20A**

| Parameter                | Value            |
|--------------------------|------------------|
| 1 Title                  | DVR04211d2.1.fid |
| 2 Solvent                | CDC13            |
| 3 Temperature            | 297.6            |
| 4 Number of Scans        | 16               |
| 5 Receiver Gain          | 181              |
| 6 Relaxation Delay       | 1.0000           |
| 7 Pulse Width            | 10.7700          |
| 8 Spectrometer Frequency | 600.32           |
| 9 Nucleus                | <sup>1</sup> H   |

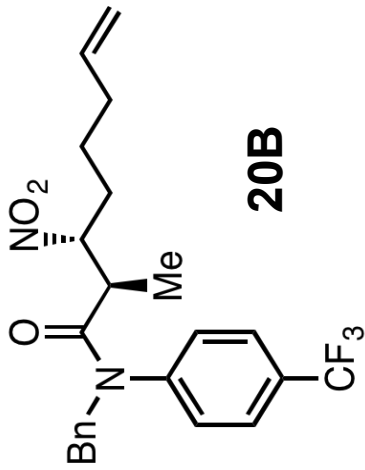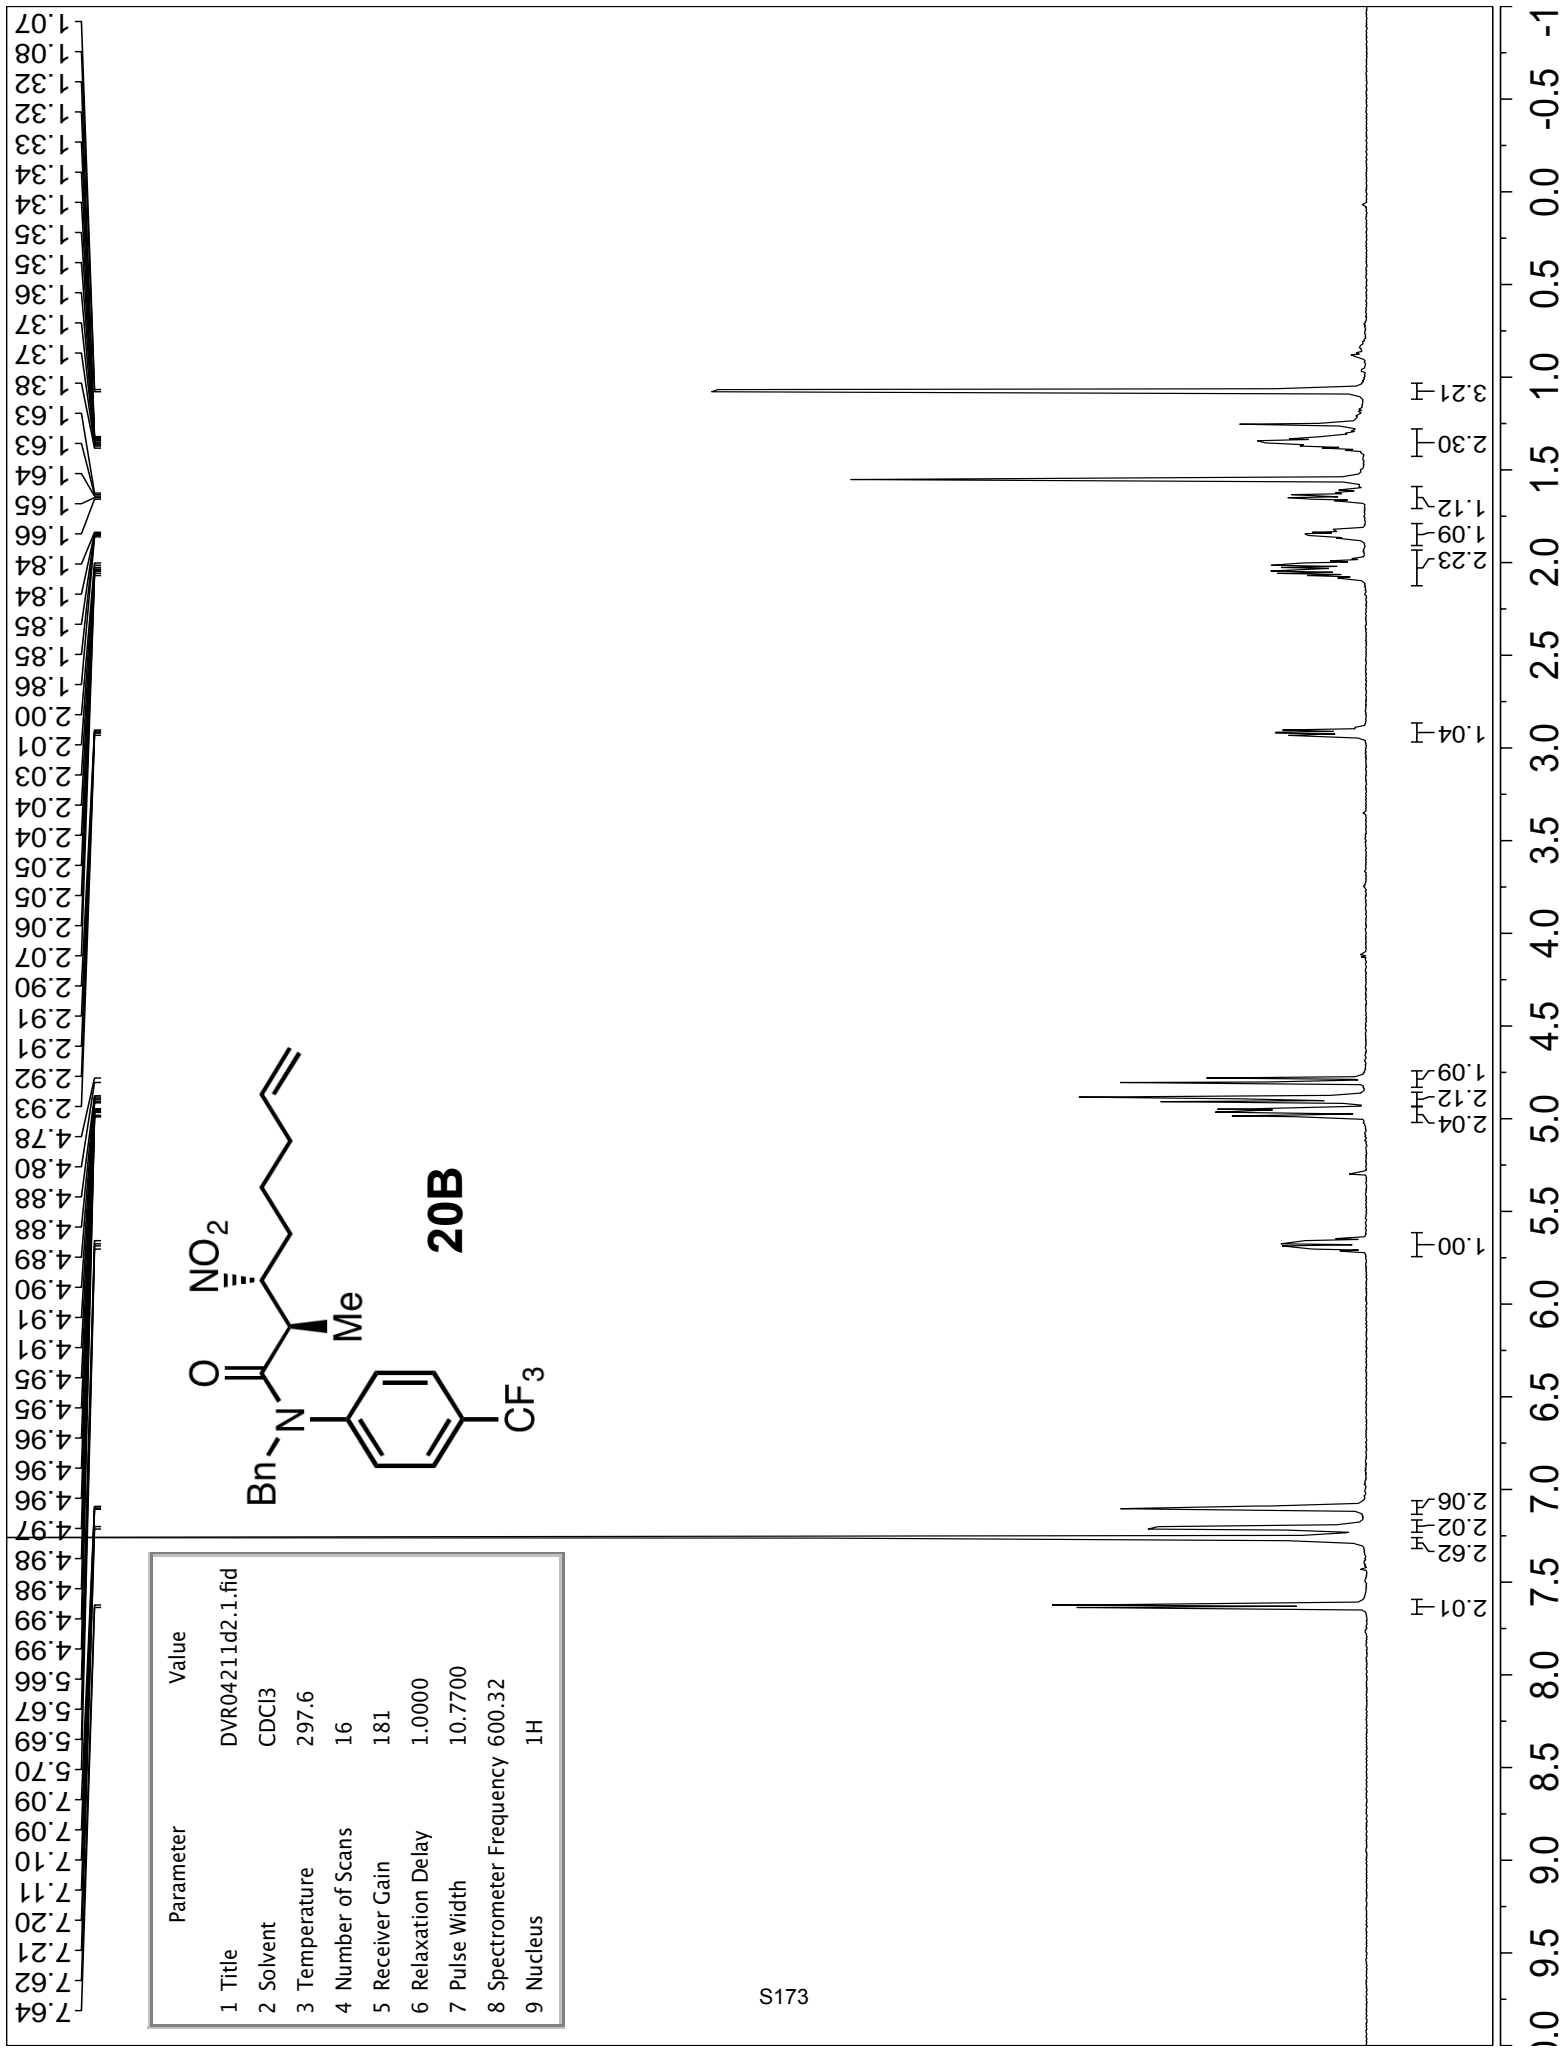

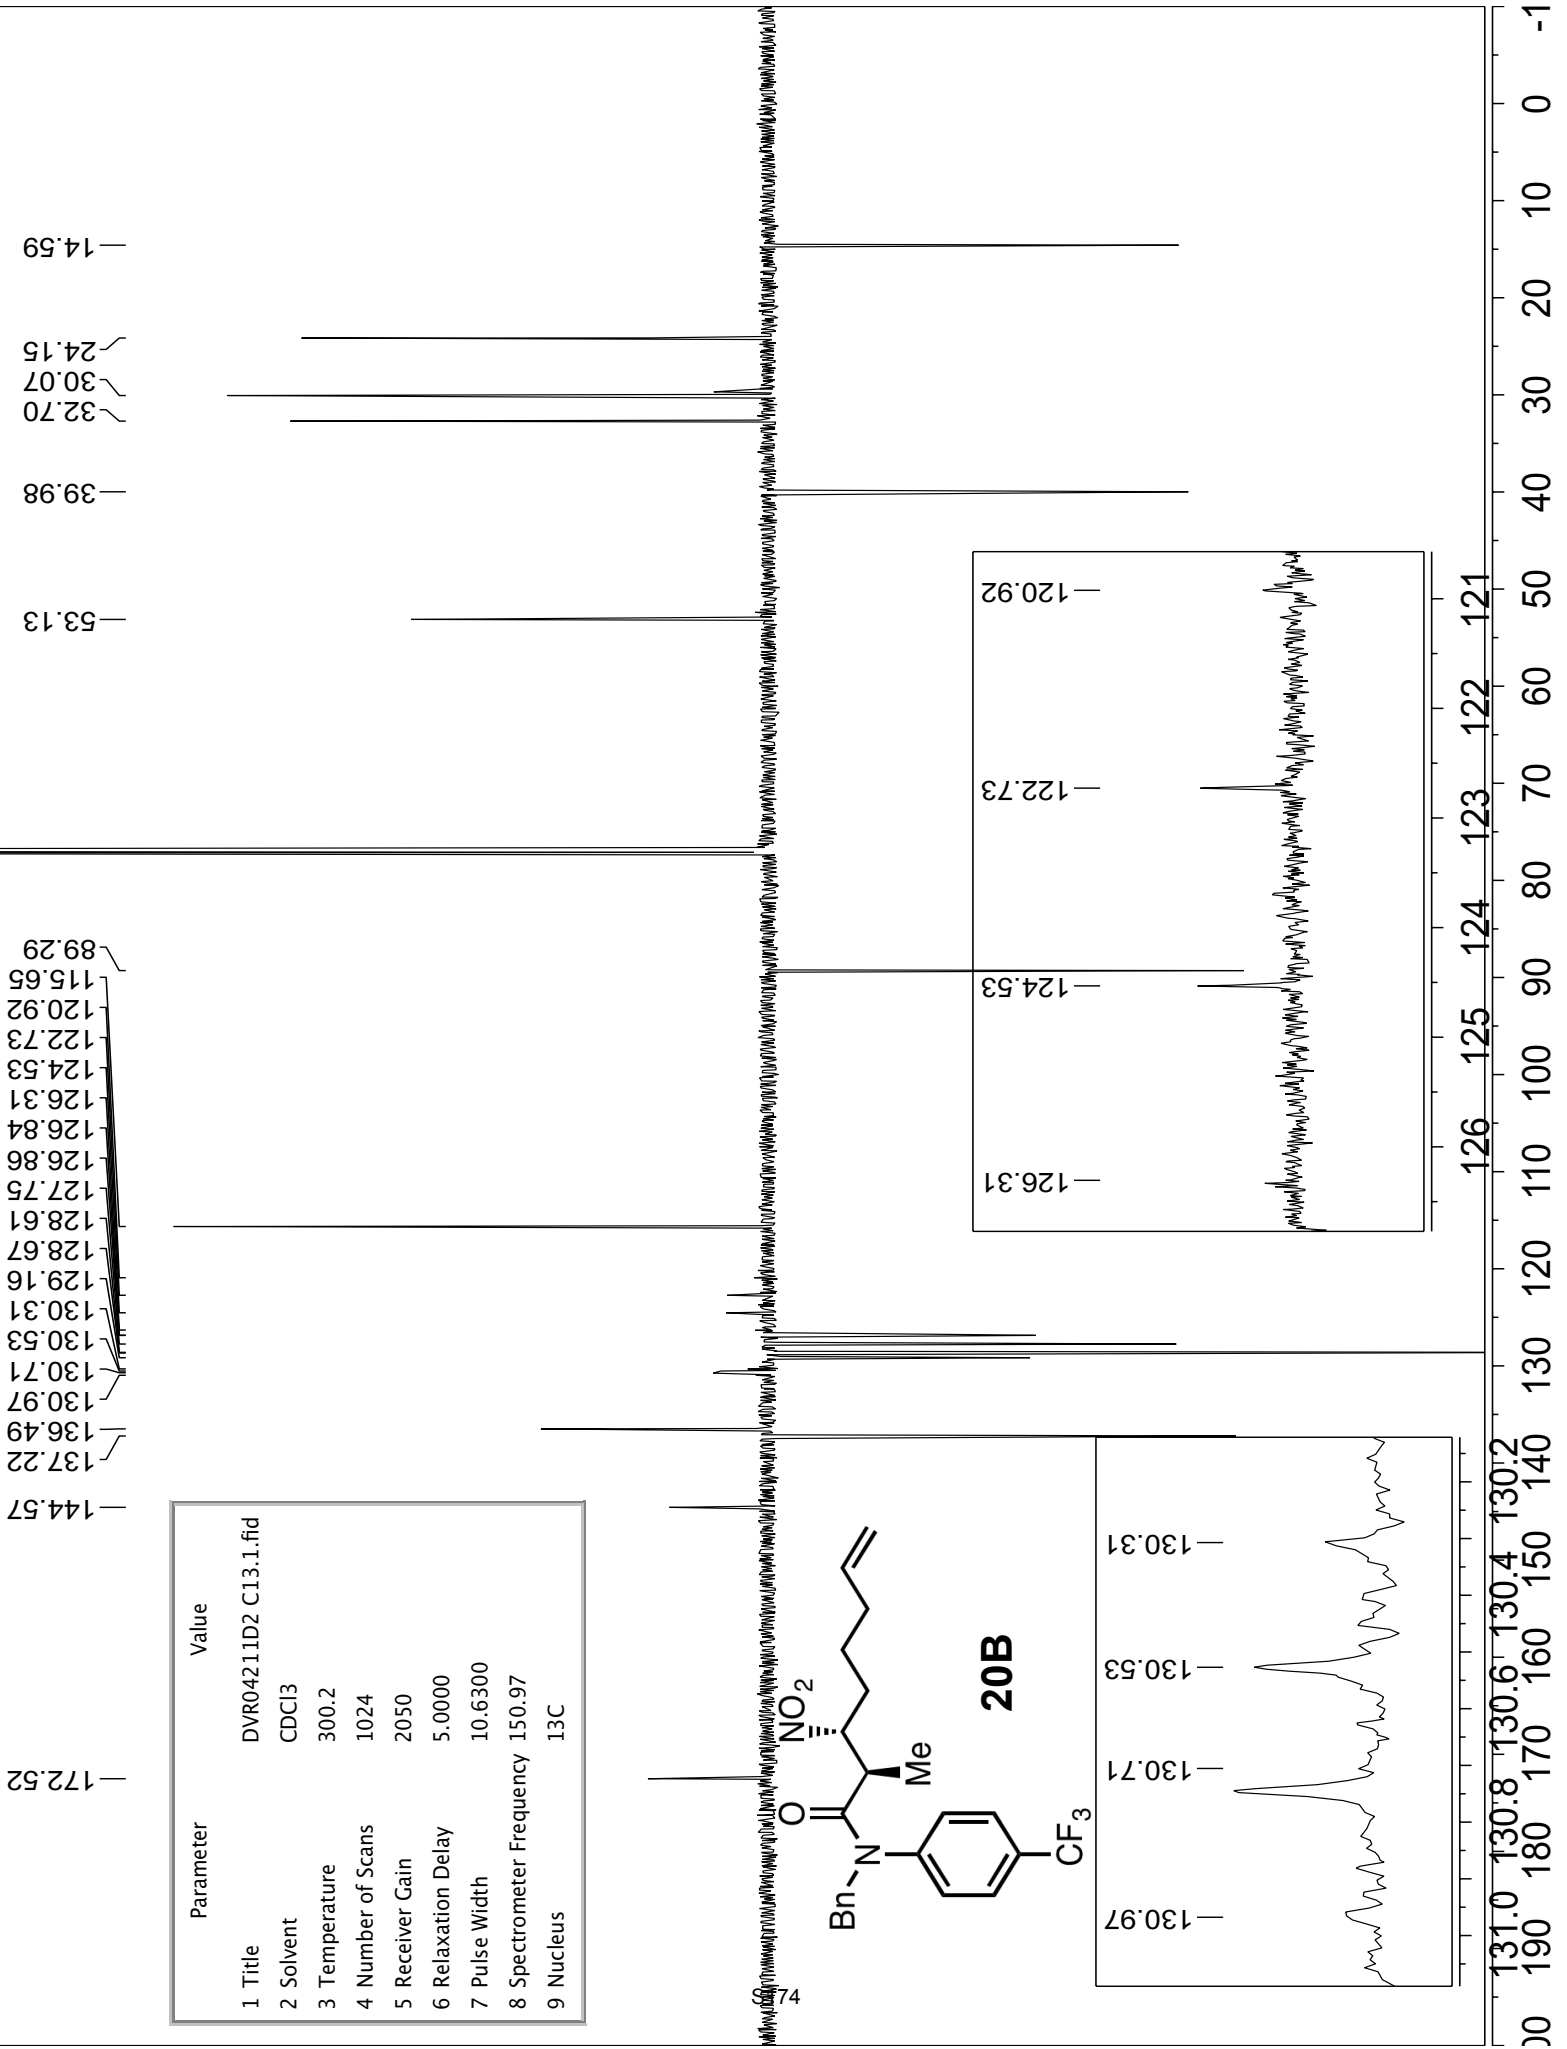

| Parameter                | Value                |
|--------------------------|----------------------|
| 1 Title                  | DVR04211D2 C13.1.fid |
| 2 Solvent                | CDCl3                |
| 3 Temperature            | 300.2                |
| 4 Number of Scans        | 1024                 |
| 5 Receiver Gain          | 2050                 |
| 6 Relaxation Delay       | 5.0000               |
| 7 Pulse Width            | 10.6300              |
| 8 Spectrometer Frequency | 150.97               |
| 9 Nucleus                | 13C                  |

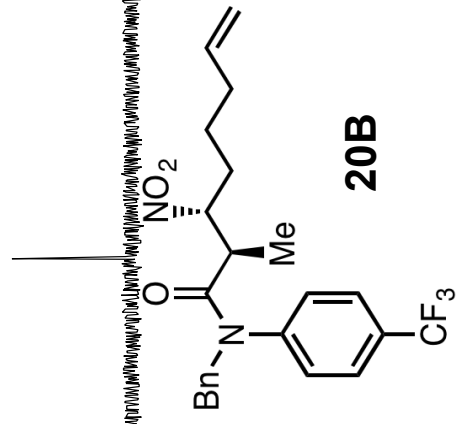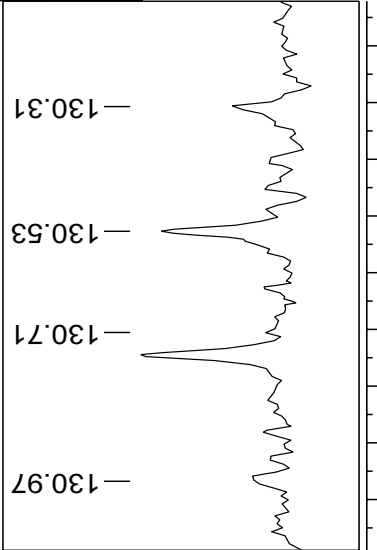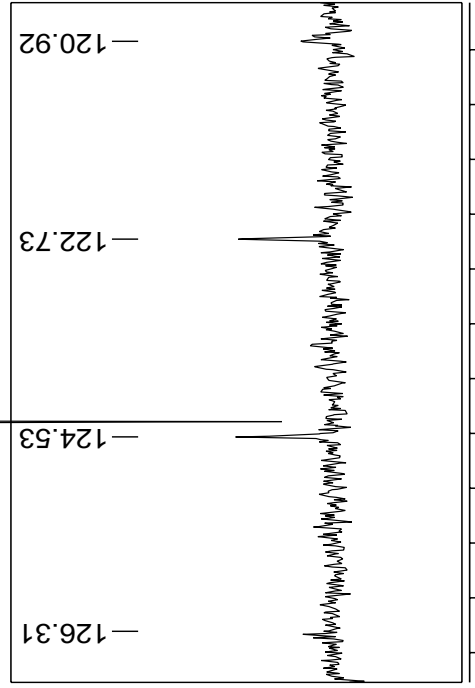

-62.61

| Parameter                | Value                |
|--------------------------|----------------------|
| 1 Title                  | DVR04211D2 F19.1.fid |
| 2 Solvent                | CDCl3                |
| 3 Temperature            | 297.6                |
| 4 Number of Scans        | 16                   |
| 5 Receiver Gain          | 362                  |
| 6 Relaxation Delay       | 3.0000               |
| 7 Pulse Width            | 11.6200              |
| 8 Spectrometer Frequency | 564.81               |
| 9 Nucleus                | <sup>19</sup> F      |

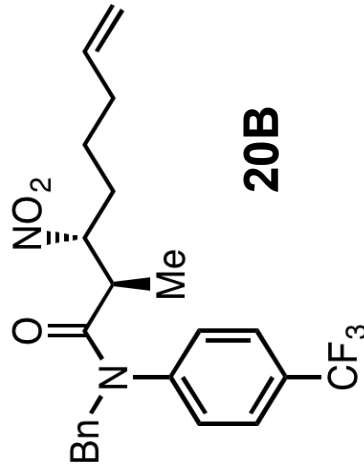

S175

0 -5 -10 -15 -20 -25 -30 -35 -40 -45 -50 -55 -60 -65 -70 -75 -80 -85 -90 -95 -100

Parameter Value

1 Title DVR04208CRD.1.fid  
2 Solvent CDCl3  
3 Temperature 300.0  
4 Number of Scans 16  
5 Receiver Gain 114  
6 Relaxation Delay 1.0000  
7 Pulse Width 10.7700  
8 Spectrometer Frequency 600.32  
9 Nucleus 1H

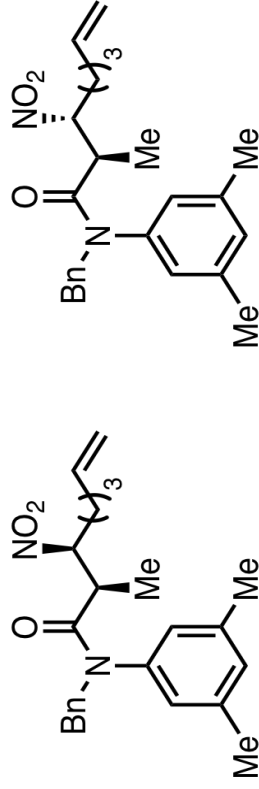

**Crude**

**21A**

**83:17**

**21B**

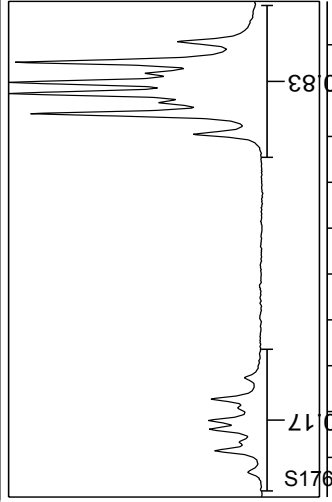

3.05 3.00 2.95 2.90 2.85

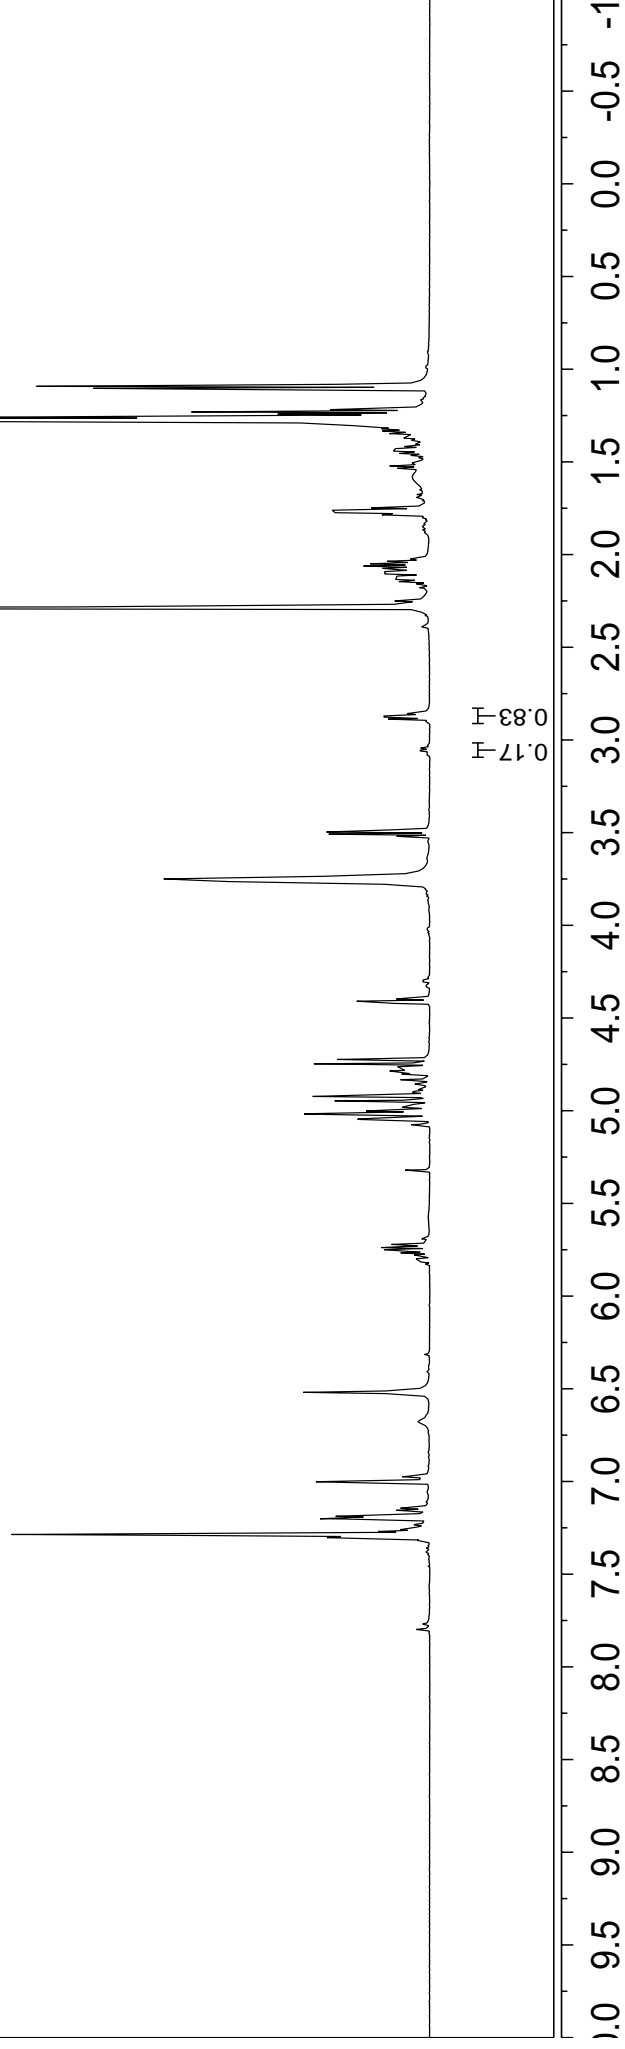



141.00  
139.64  
137.40  
137.13  
130.28  
128.87  
128.35  
127.54  
125.76  
115.46  
91.79  
53.18  
40.92  
32.80  
31.72  
24.85  
21.16  
15.65

| Parameter                | Value               |
|--------------------------|---------------------|
| 1 Title                  | DVR04208D1C13.1.fid |
| 2 Solvent                | CDCl3               |
| 3 Temperature            | 298.1               |
| 4 Number of Scans        | 1024                |
| 5 Receiver Gain          | 512                 |
| 6 Relaxation Delay       | 3.0000              |
| 7 Pulse Width            | 9.2500              |
| 8 Spectrometer Frequency | 100.62              |
| 9 Nucleus                | 13C                 |

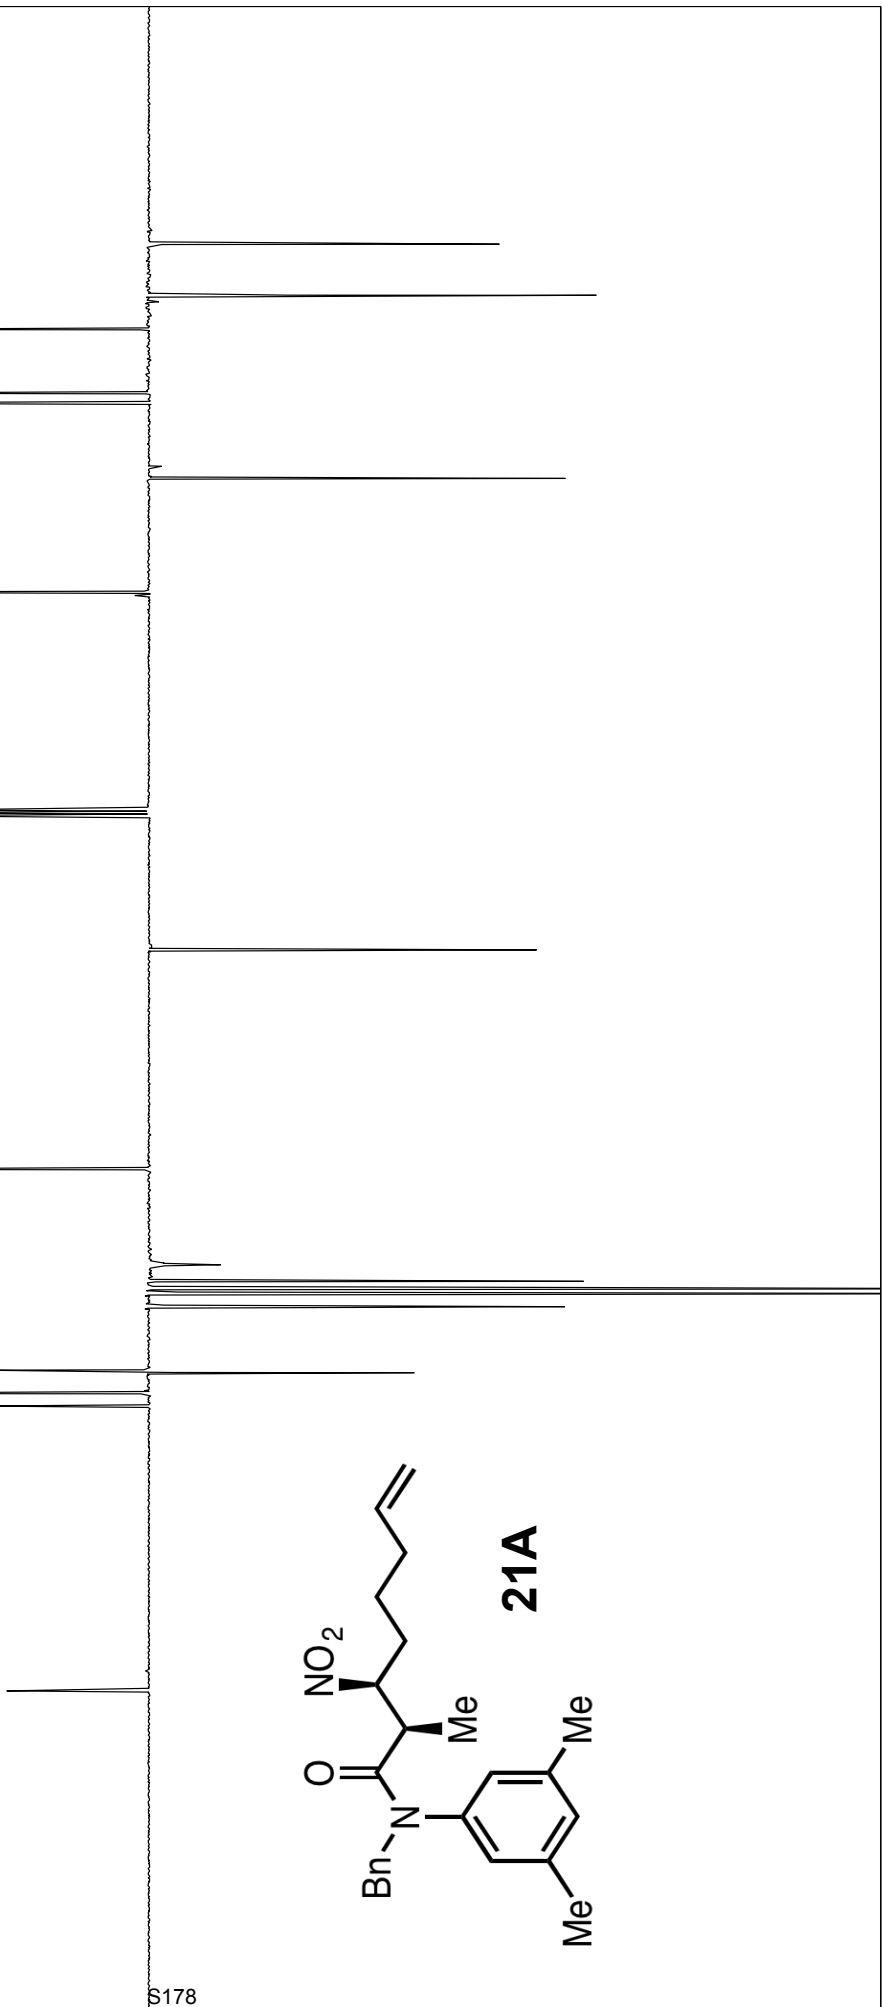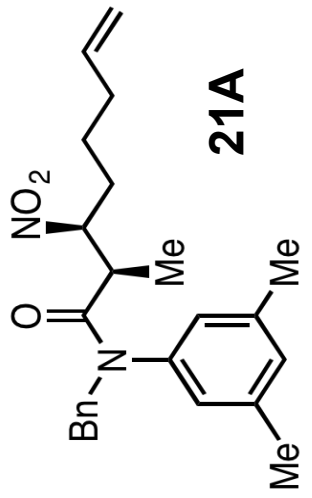



| Parameter                | Value            |
|--------------------------|------------------|
| 1 Title                  | DVR04208D2.1.fid |
| 2 Solvent                | CDCI3            |
| 3 Temperature            | 298.2            |
| 4 Number of Scans        | 16               |
| 5 Receiver Gain          | 10               |
| 6 Relaxation Delay       | 1.0000           |
| 7 Pulse Width            | 15.0000          |
| 8 Spectrometer Frequency | 400.13           |
| 9 Nucleus                | <sup>1</sup> H   |

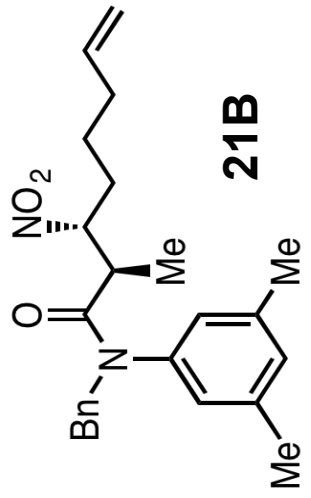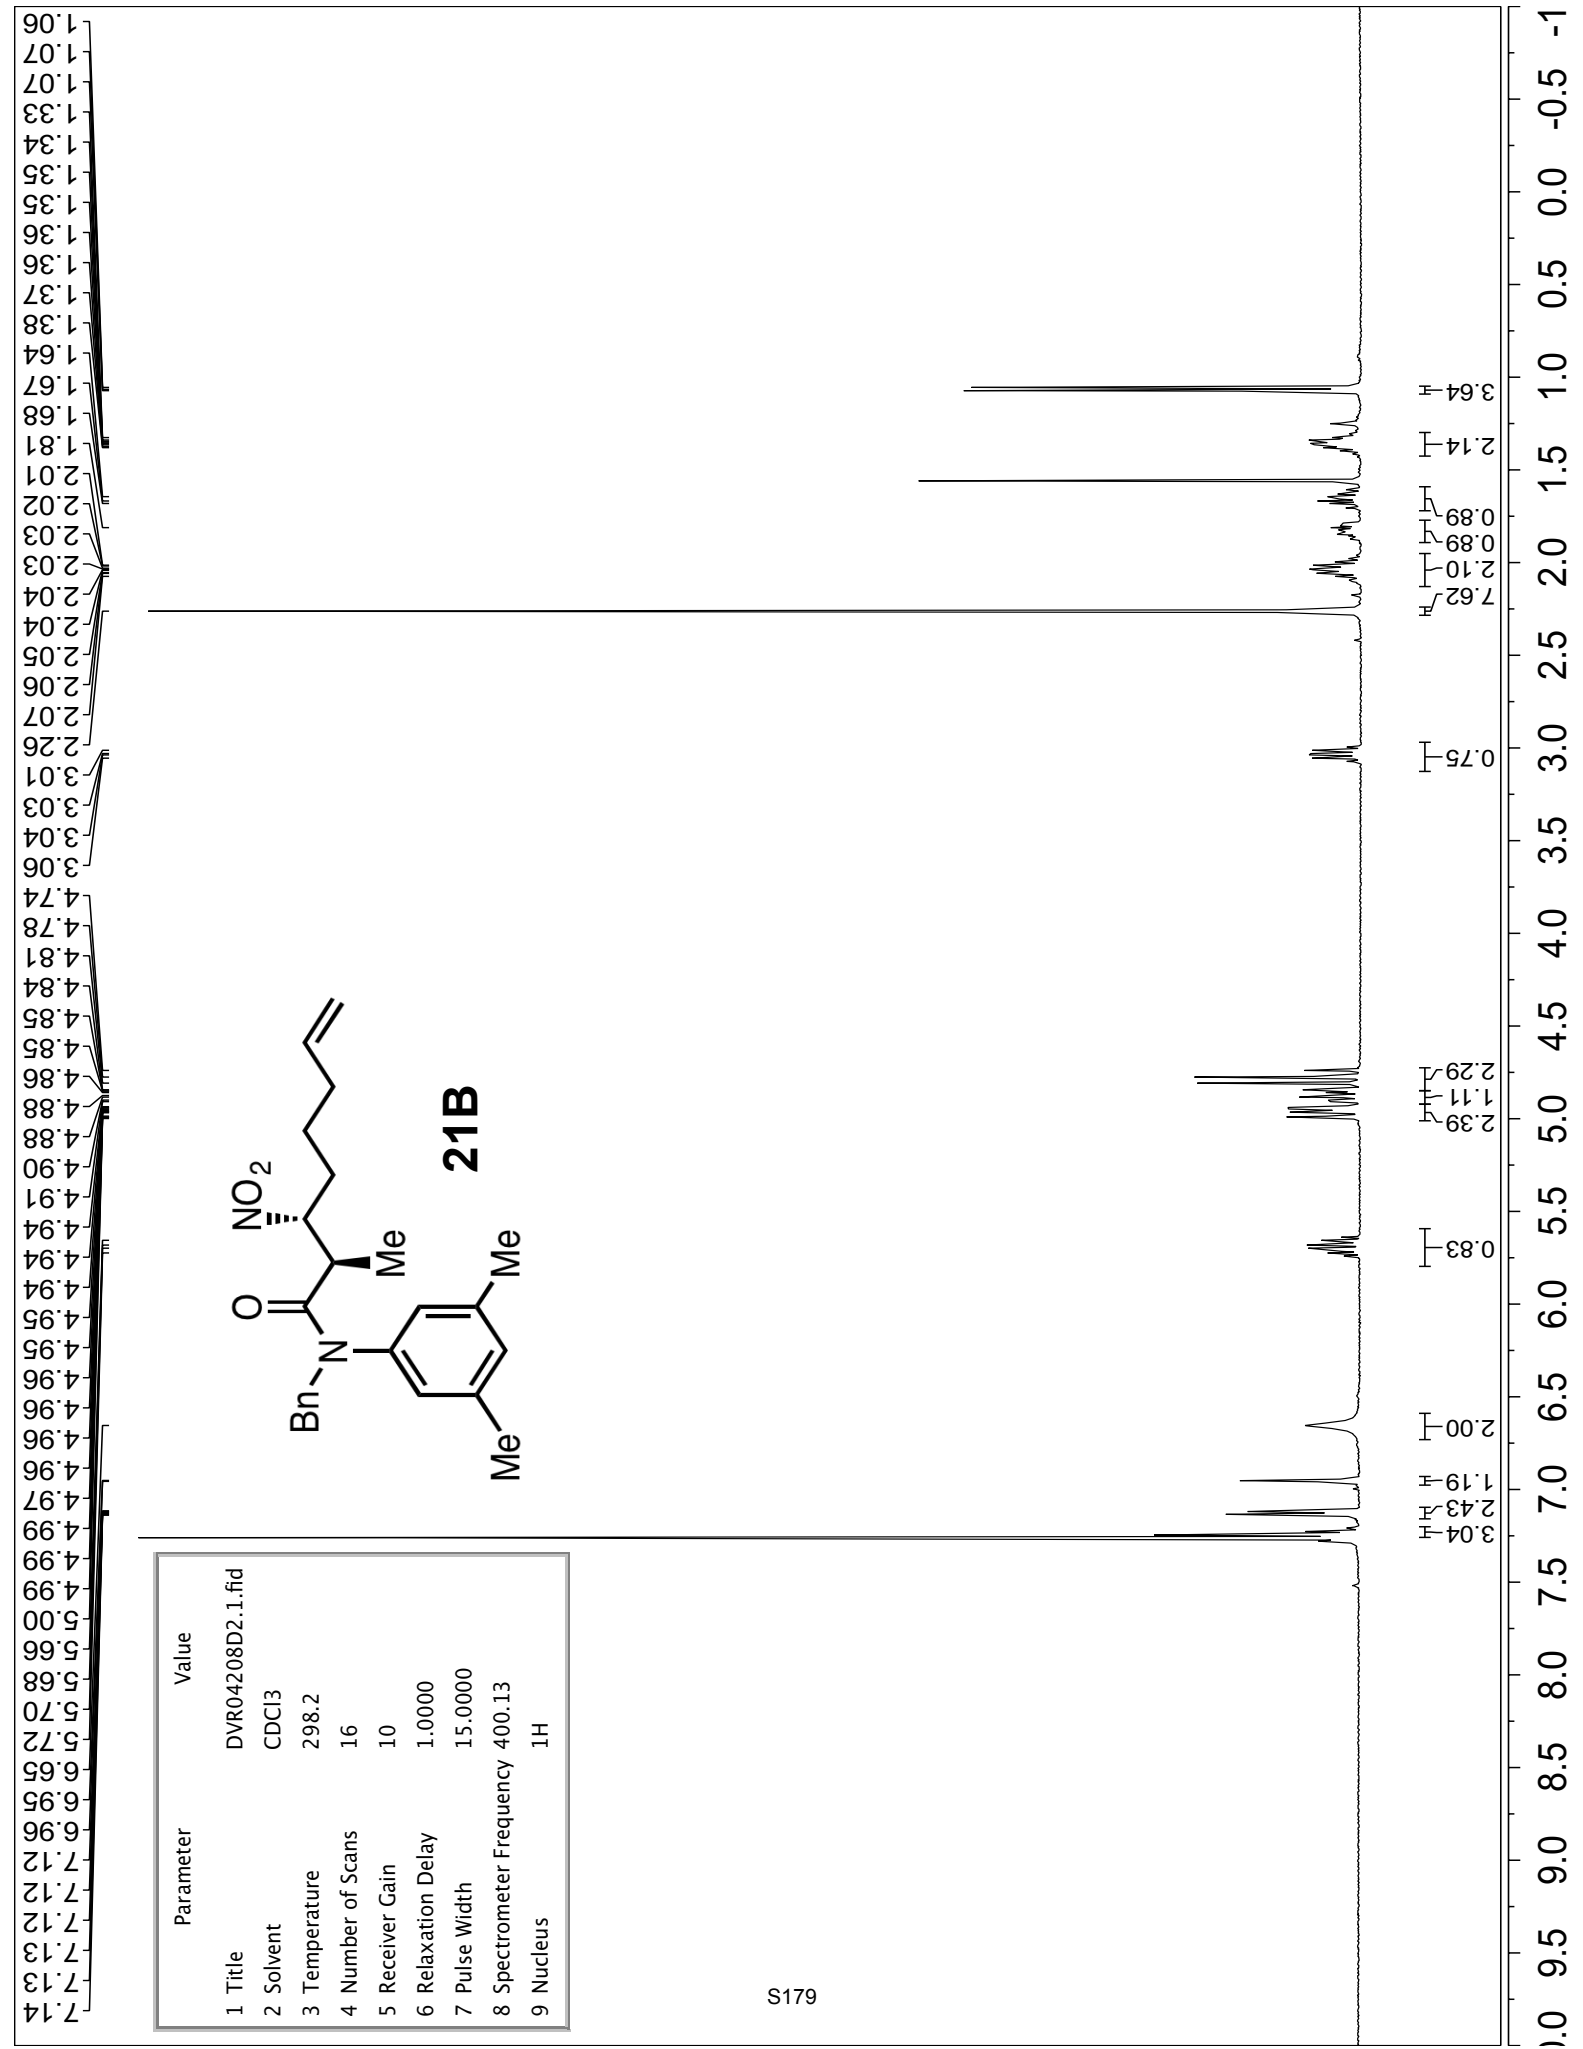

172.79  
141.18  
137.44  
137.17  
129.91  
128.58  
128.29  
127.28  
115.49  
89.34  
53.14  
39.81  
32.75  
29.92  
24.20  
21.15  
14.68

| Parameter                | Value               |
|--------------------------|---------------------|
| 1 Title                  | DVR04208D2C13.1.fid |
| 2 Solvent                | CDCI3               |
| 3 Temperature            | 298.2               |
| 4 Number of Scans        | 1024                |
| 5 Receiver Gain          | 5.12                |
| 6 Relaxation Delay       | 3.0000              |
| 7 Pulse Width            | 9.2500              |
| 8 Spectrometer Frequency | 100.62              |
| 9 Nucleus                | <sup>13</sup> C     |

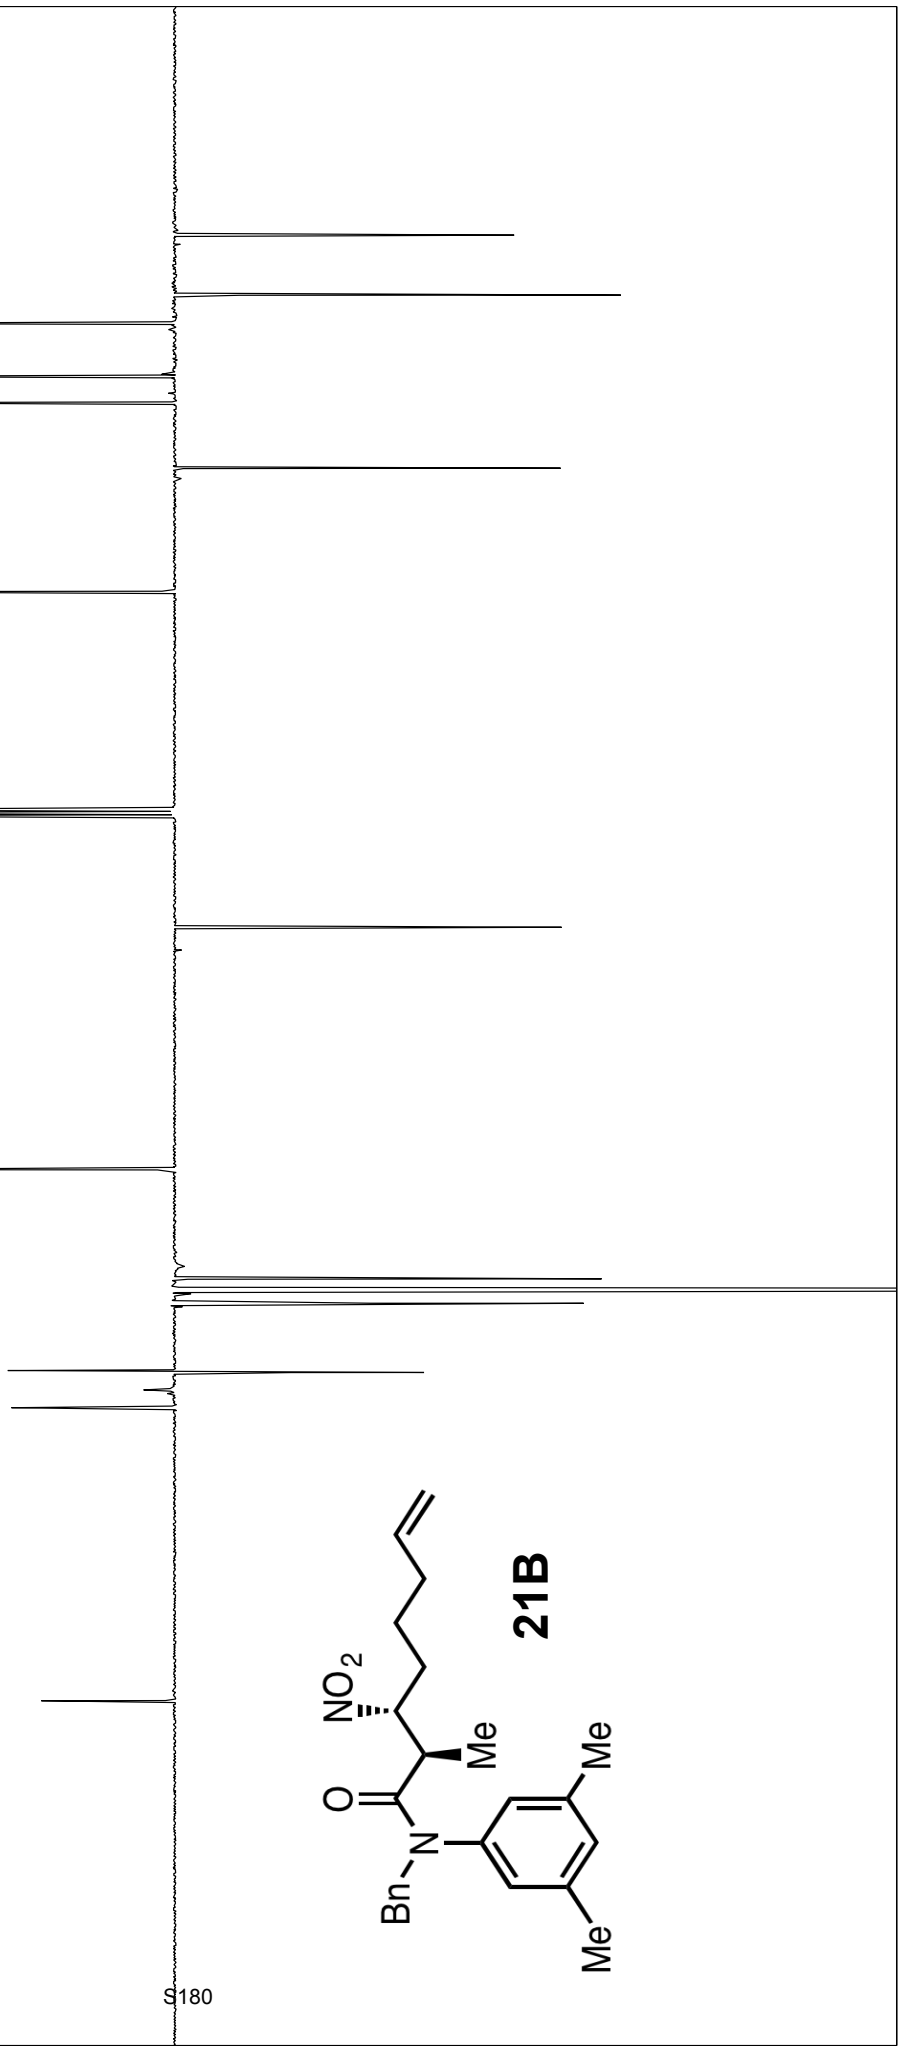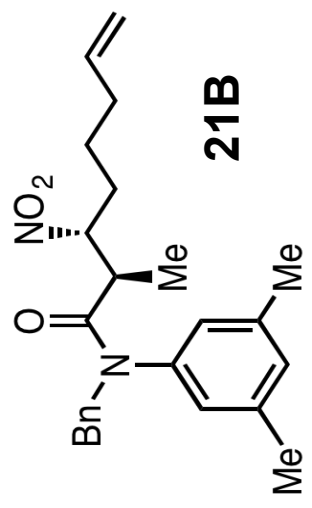

0815

| Parameter                | Value             |
|--------------------------|-------------------|
| 1 Title                  | DVR04150CRD.1.fid |
| 2 Solvent                | CDCl3             |
| 3 Temperature            | 297.9             |
| 4 Number of Scans        | 16                |
| 5 Receiver Gain          | 114               |
| 6 Relaxation Delay       | 1.0000            |
| 7 Pulse Width            | 10.7700           |
| 8 Spectrometer Frequency | 600.32            |
| 9 Nucleus                | <sup>1</sup> H    |

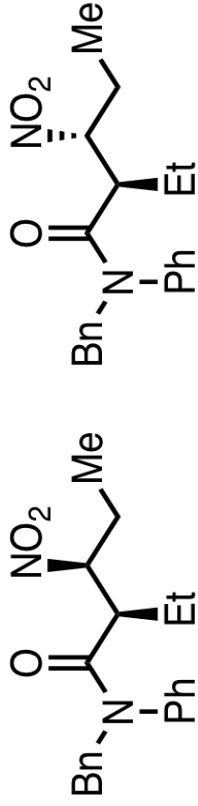

**Crude**

**22A**

**55:45**

**22B**

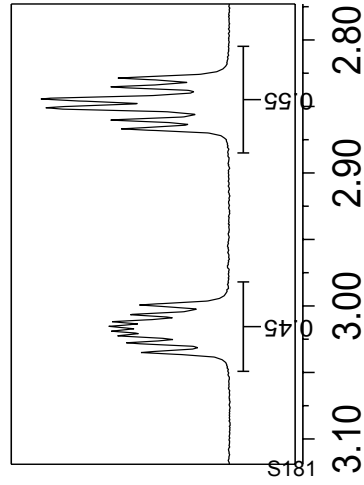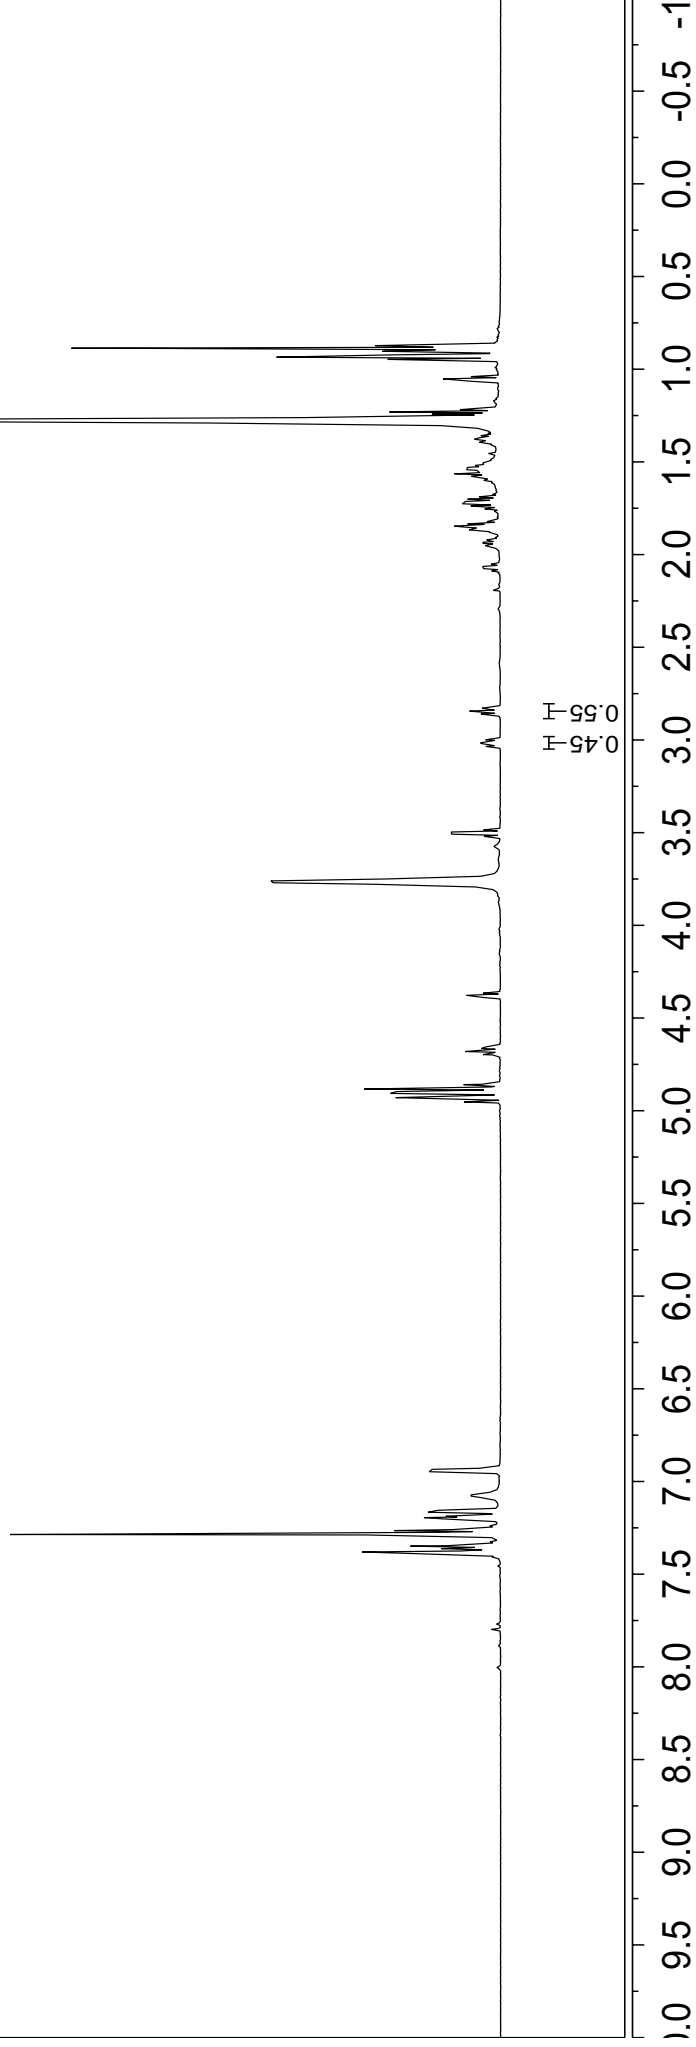

| Parameter                | Value            |
|--------------------------|------------------|
| 1 Title                  | DVR04150D1.1.fid |
| 2 Solvent                | CDCl3            |
| 3 Temperature            | 297.2            |
| 4 Number of Scans        | 16               |
| 5 Receiver Gain          | 57               |
| 6 Relaxation Delay       | 1.0000           |
| 7 Pulse Width            | 10.7700          |
| 8 Spectrometer Frequency | 600.32           |
| 9 Nucleus                | <sup>1</sup> H   |

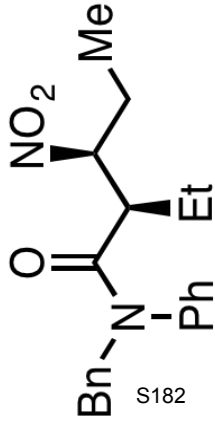

22A

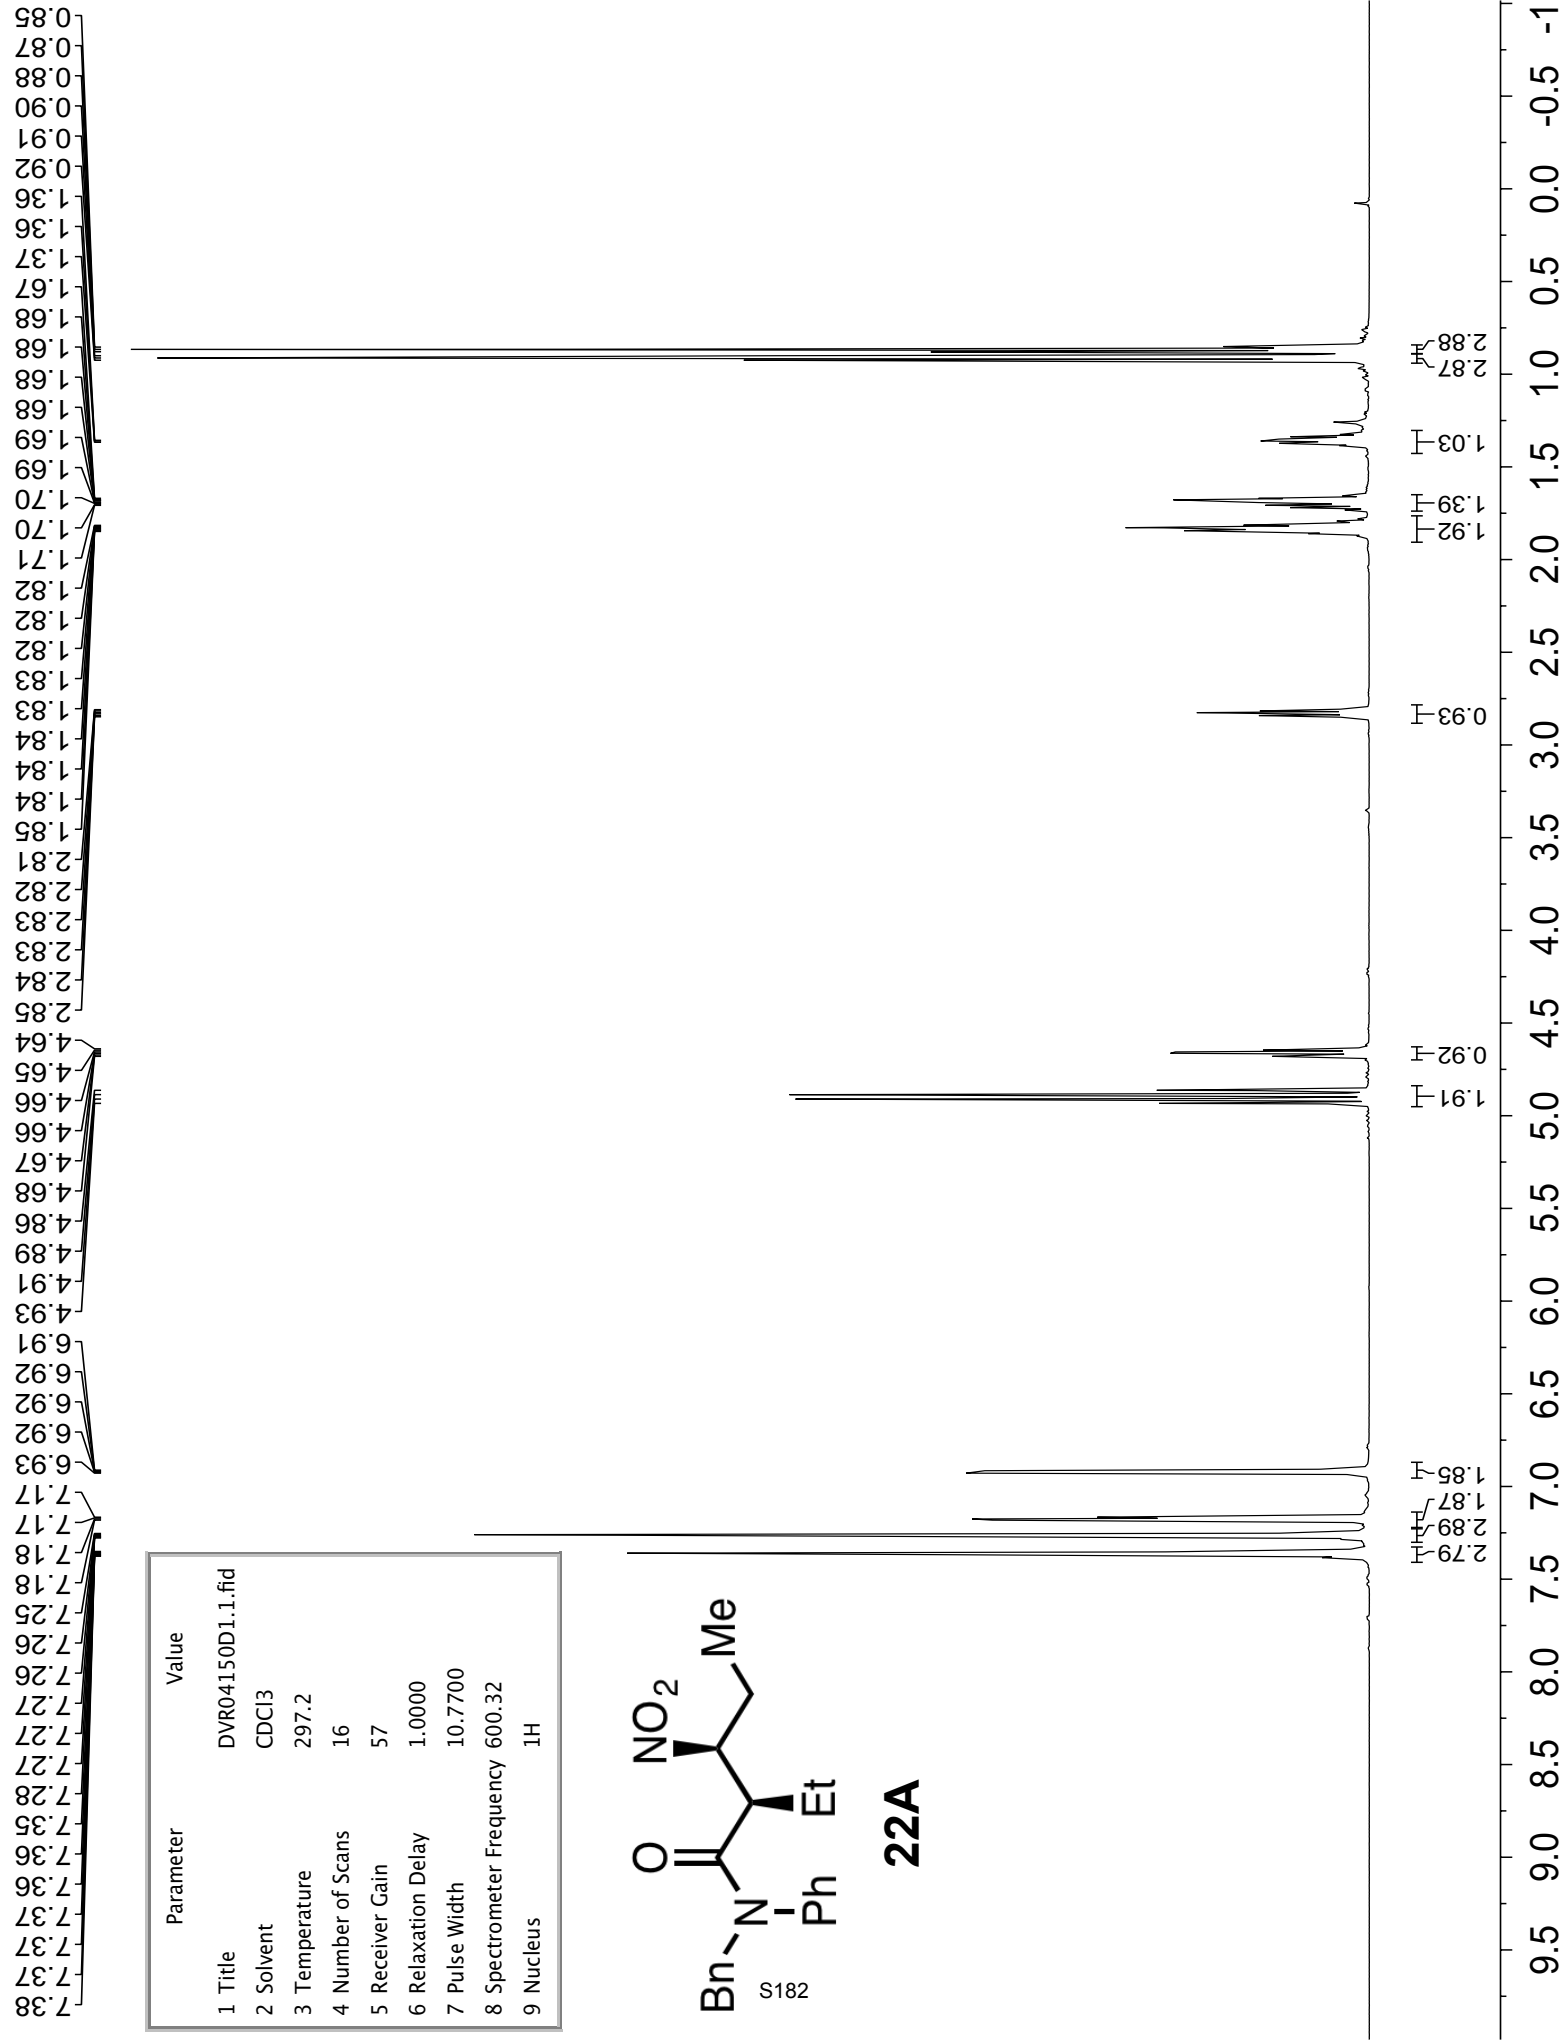

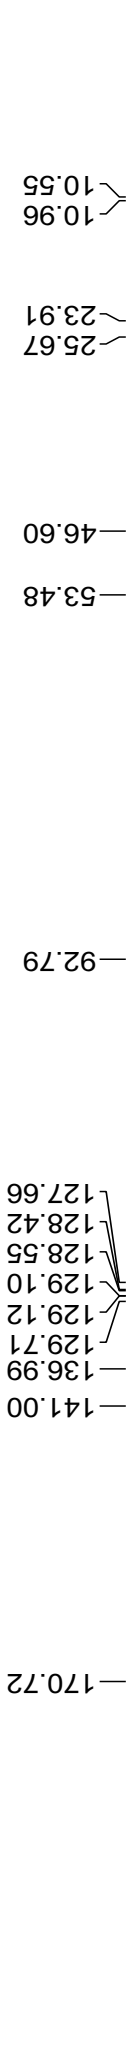

| Parameter                | Value                |
|--------------------------|----------------------|
| 1 Title                  | DVR04150D1 C13.2.fid |
| 2 Solvent                | CDCl3                |
| 3 Temperature            | 299.8                |
| 4 Number of Scans        | 1024                 |
| 5 Receiver Gain          | 2050                 |
| 6 Relaxation Delay       | 5.0000               |
| 7 Pulse Width            | 10.6300              |
| 8 Spectrometer Frequency | 150.97               |
| 9 Nucleus                | 13C                  |

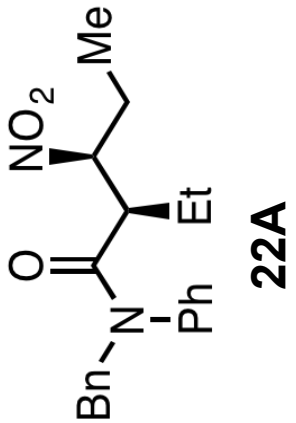

7.35  
7.34  
7.34  
7.33  
7.33  
7.32  
7.32  
7.32  
7.32  
7.31  
7.26  
7.26  
7.26  
7.26  
7.25  
7.25  
7.25  
7.25  
7.25  
7.24  
7.24  
7.24  
7.24  
7.24  
7.23  
7.23  
7.23  
7.15  
7.14  
7.14  
7.14  
7.13  
7.13  
7.06  
7.06  
7.05  
7.05  
4.90  
4.87  
4.87  
4.86  
4.85  
4.84  
4.84  
4.83  
3.01  
3.00  
3.00  
3.00  
2.99  
2.99  
1.92  
1.91  
1.91  
1.72  
1.71  
1.70  
1.70  
1.69  
1.69  
1.56  
1.55  
1.54  
1.53  
1.52  
1.51  
1.51  
1.50  
0.88  
0.88  
0.86  
0.85

| Parameter                | Value            |
|--------------------------|------------------|
| 1 Title                  | DVR04150D2.1.fid |
| 2 Solvent                | CDCl3            |
| 3 Temperature            | 298.2            |
| 4 Number of Scans        | 16               |
| 5 Receiver Gain          | 57               |
| 6 Relaxation Delay       | 1.0000           |
| 7 Pulse Width            | 10.7700          |
| 8 Spectrometer Frequency | 600.32           |
| 9 Nucleus                | 1H               |

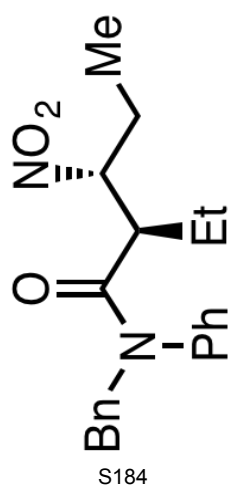

22B

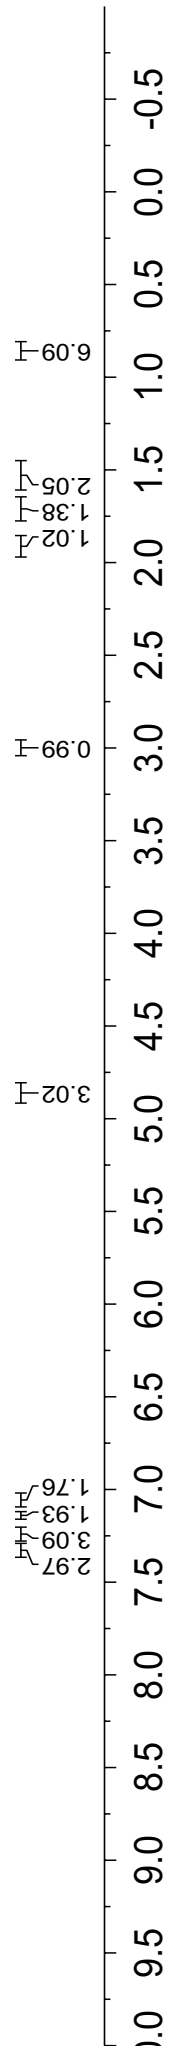

| Parameter                | Value                |
|--------------------------|----------------------|
| 1 Title                  | DVR04150D2 C13.2.fid |
| 2 Solvent                | CDCl3                |
| 3 Temperature            | 299.8                |
| 4 Number of Scans        | 1024                 |
| 5 Receiver Gain          | 2050                 |
| 6 Relaxation Delay       | 5.0000               |
| 7 Pulse Width            | 10.6300              |
| 8 Spectrometer Frequency | 150.97               |
| 9 Nucleus                | <sup>13</sup> C      |

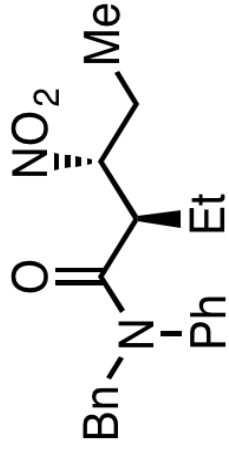

**22B**

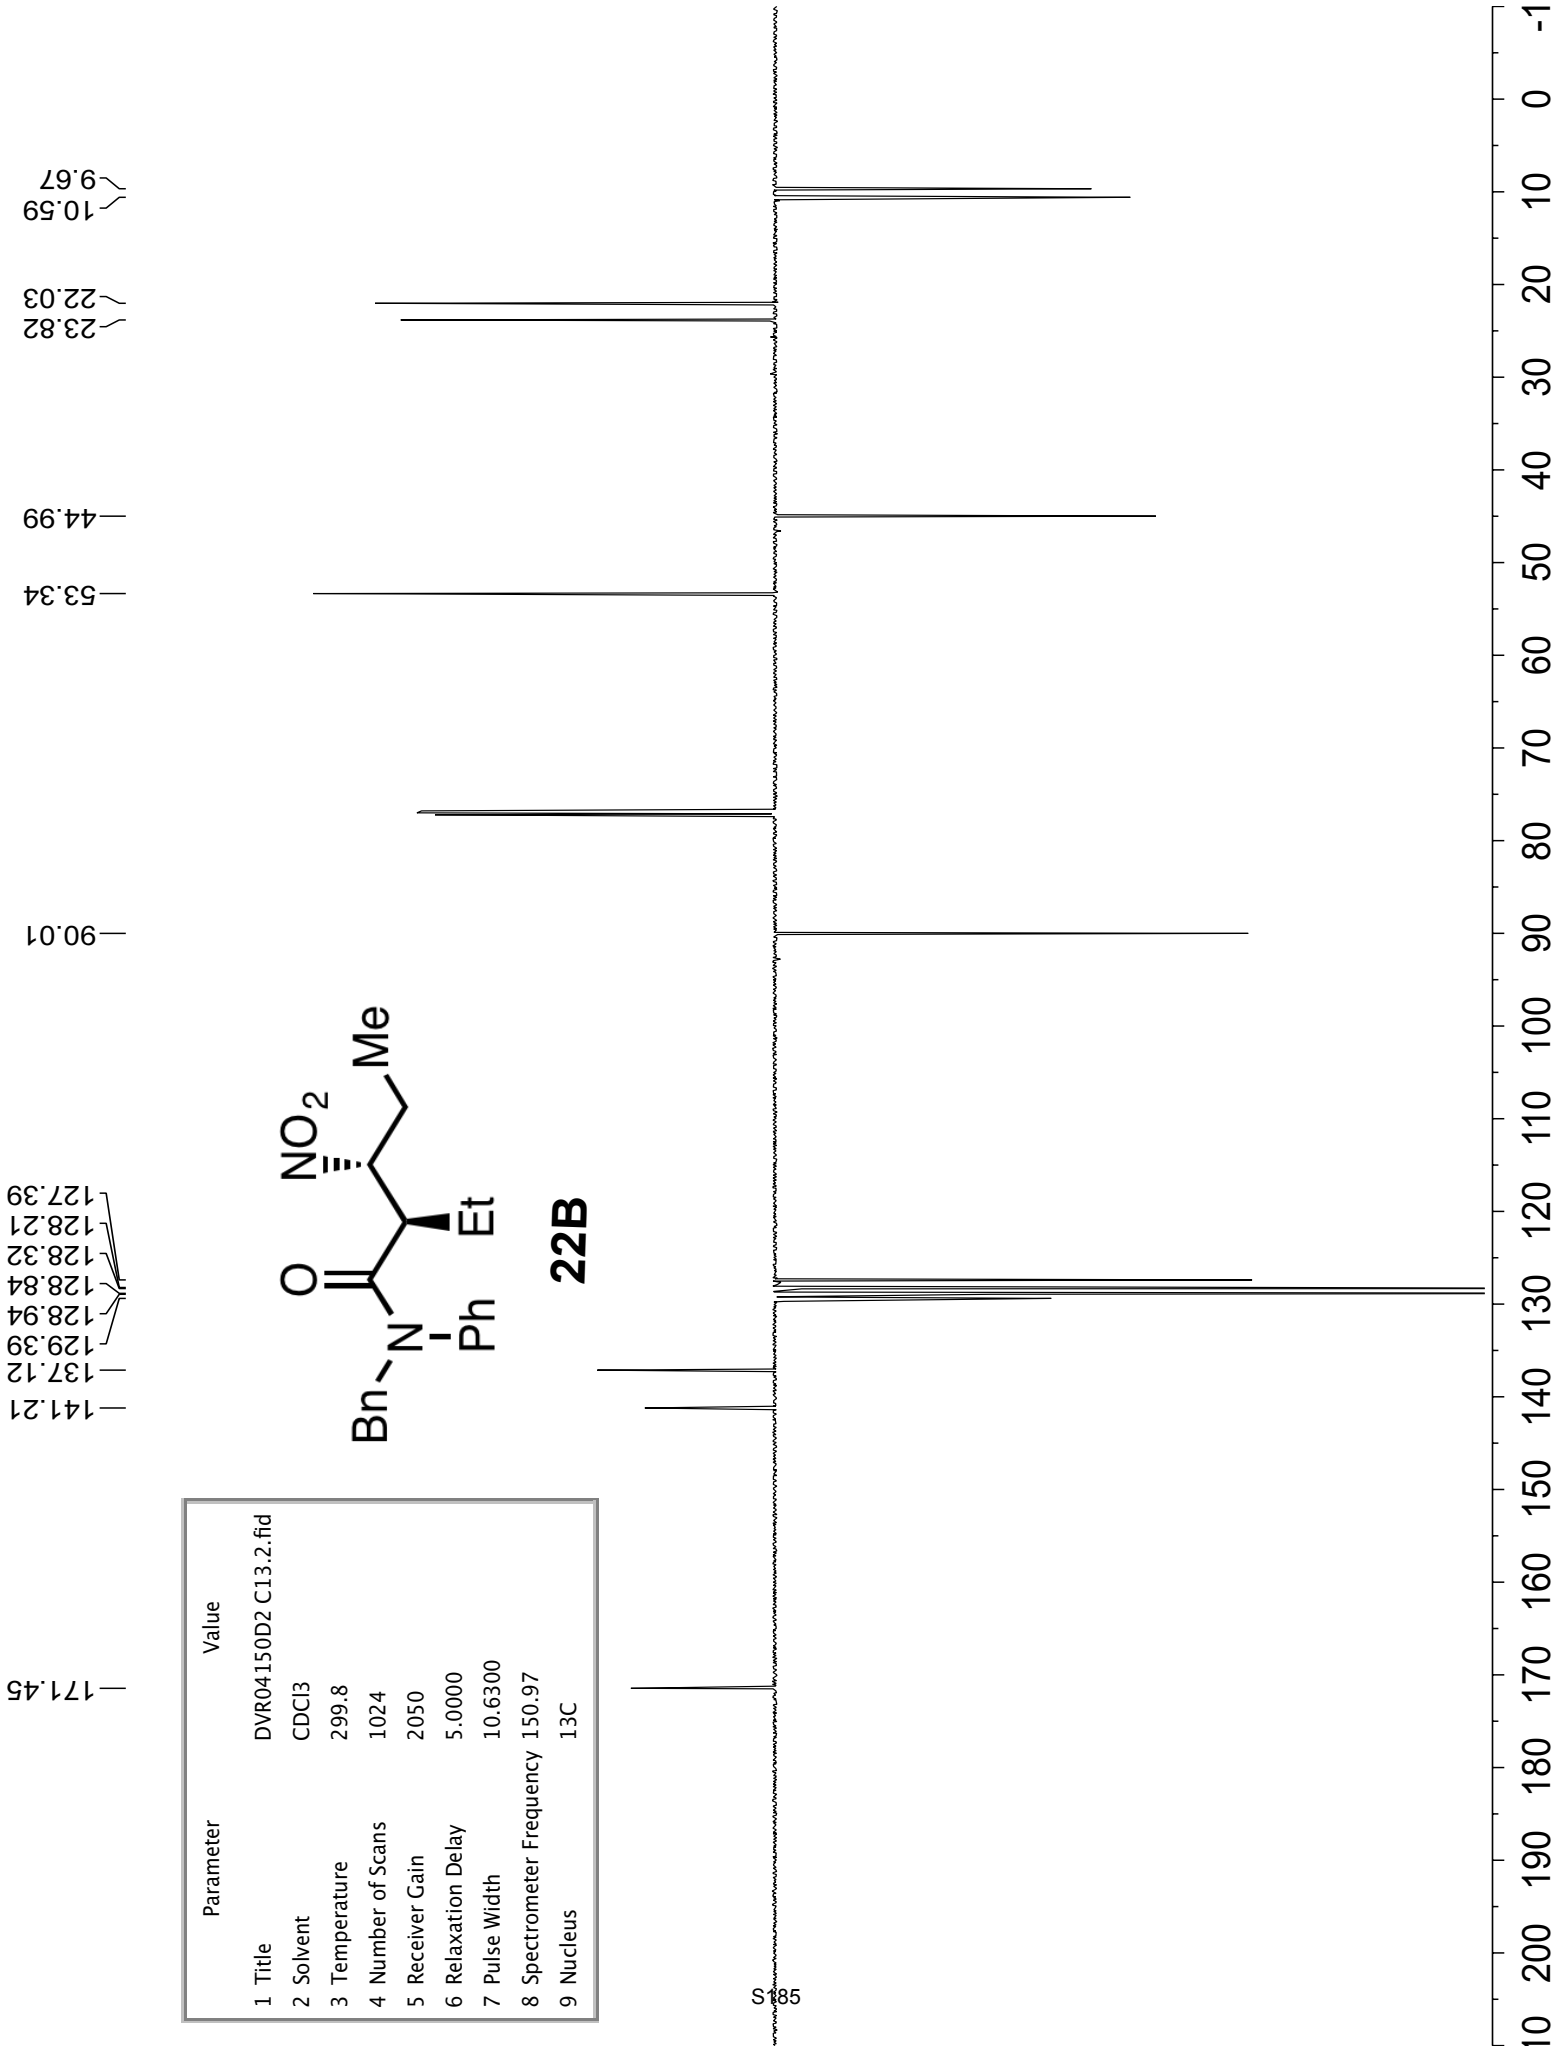

| Parameter                | Value                 |
|--------------------------|-----------------------|
| 1 Title                  | RS-01-229-crude.1.fid |
| 2 Solvent                | CDCl3                 |
| 3 Temperature            | 300.0                 |
| 4 Number of Scans        | 16                    |
| 5 Receiver Gain          | 32                    |
| 6 Relaxation Delay       | 10.0000               |
| 7 Pulse Width            | 10.7700               |
| 8 Spectrometer Frequency | 600.32                |
| 9 Nucleus                | 1H                    |

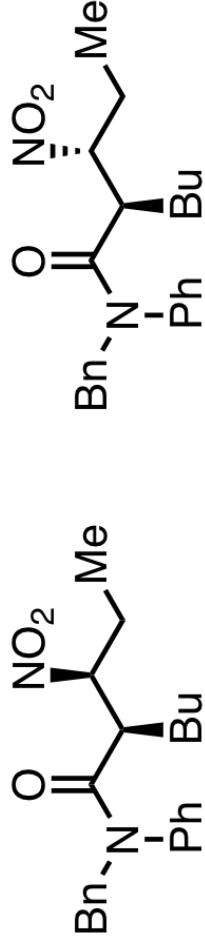

**Crude**  
**54:46**

**23A**

**23B**

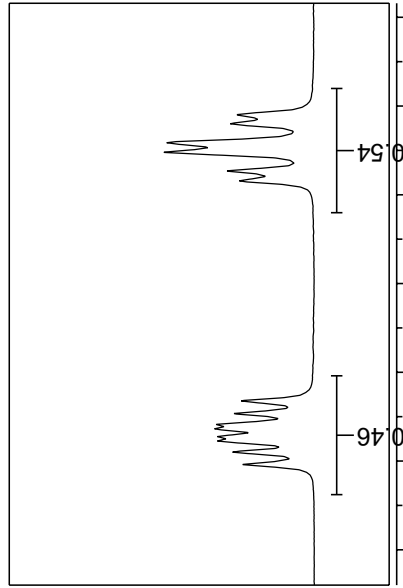

3.10 3.00 2.90 2.80

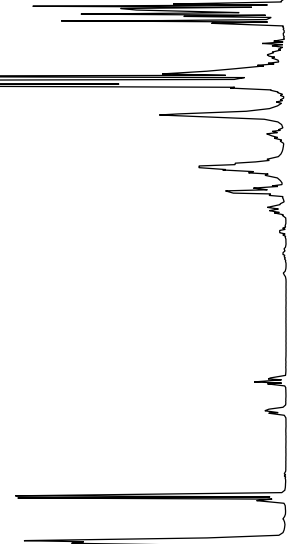

0.46 H  
0.54 H

1.0 9.5 9.0 8.5 8.0 7.5 7.0 6.5 6.0 5.5 5.0 4.5 4.0 3.5 3.0 2.5 2.0 1.5 1.0 0.5 0.0 -0.5 -1



| Parameter                | Value                |
|--------------------------|----------------------|
| 1 Title                  | RS-01-229-run2.1.fid |
| 2 Solvent                | CDCl3                |
| 3 Temperature            | 298.2                |
| 4 Number of Scans        | 64                   |
| 5 Receiver Gain          | 11                   |
| 6 Relaxation Delay       | 6.0000               |
| 7 Pulse Width            | 15.0000              |
| 8 Spectrometer Frequency | 400.13               |
| 9 Nucleus                | 1H                   |

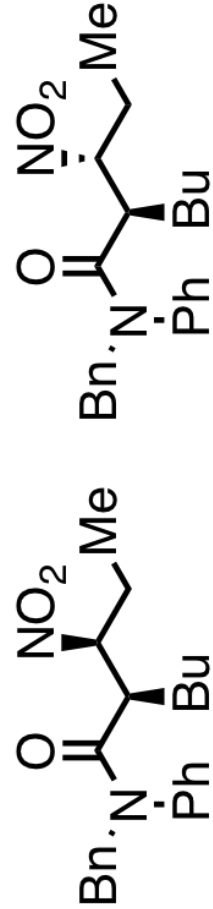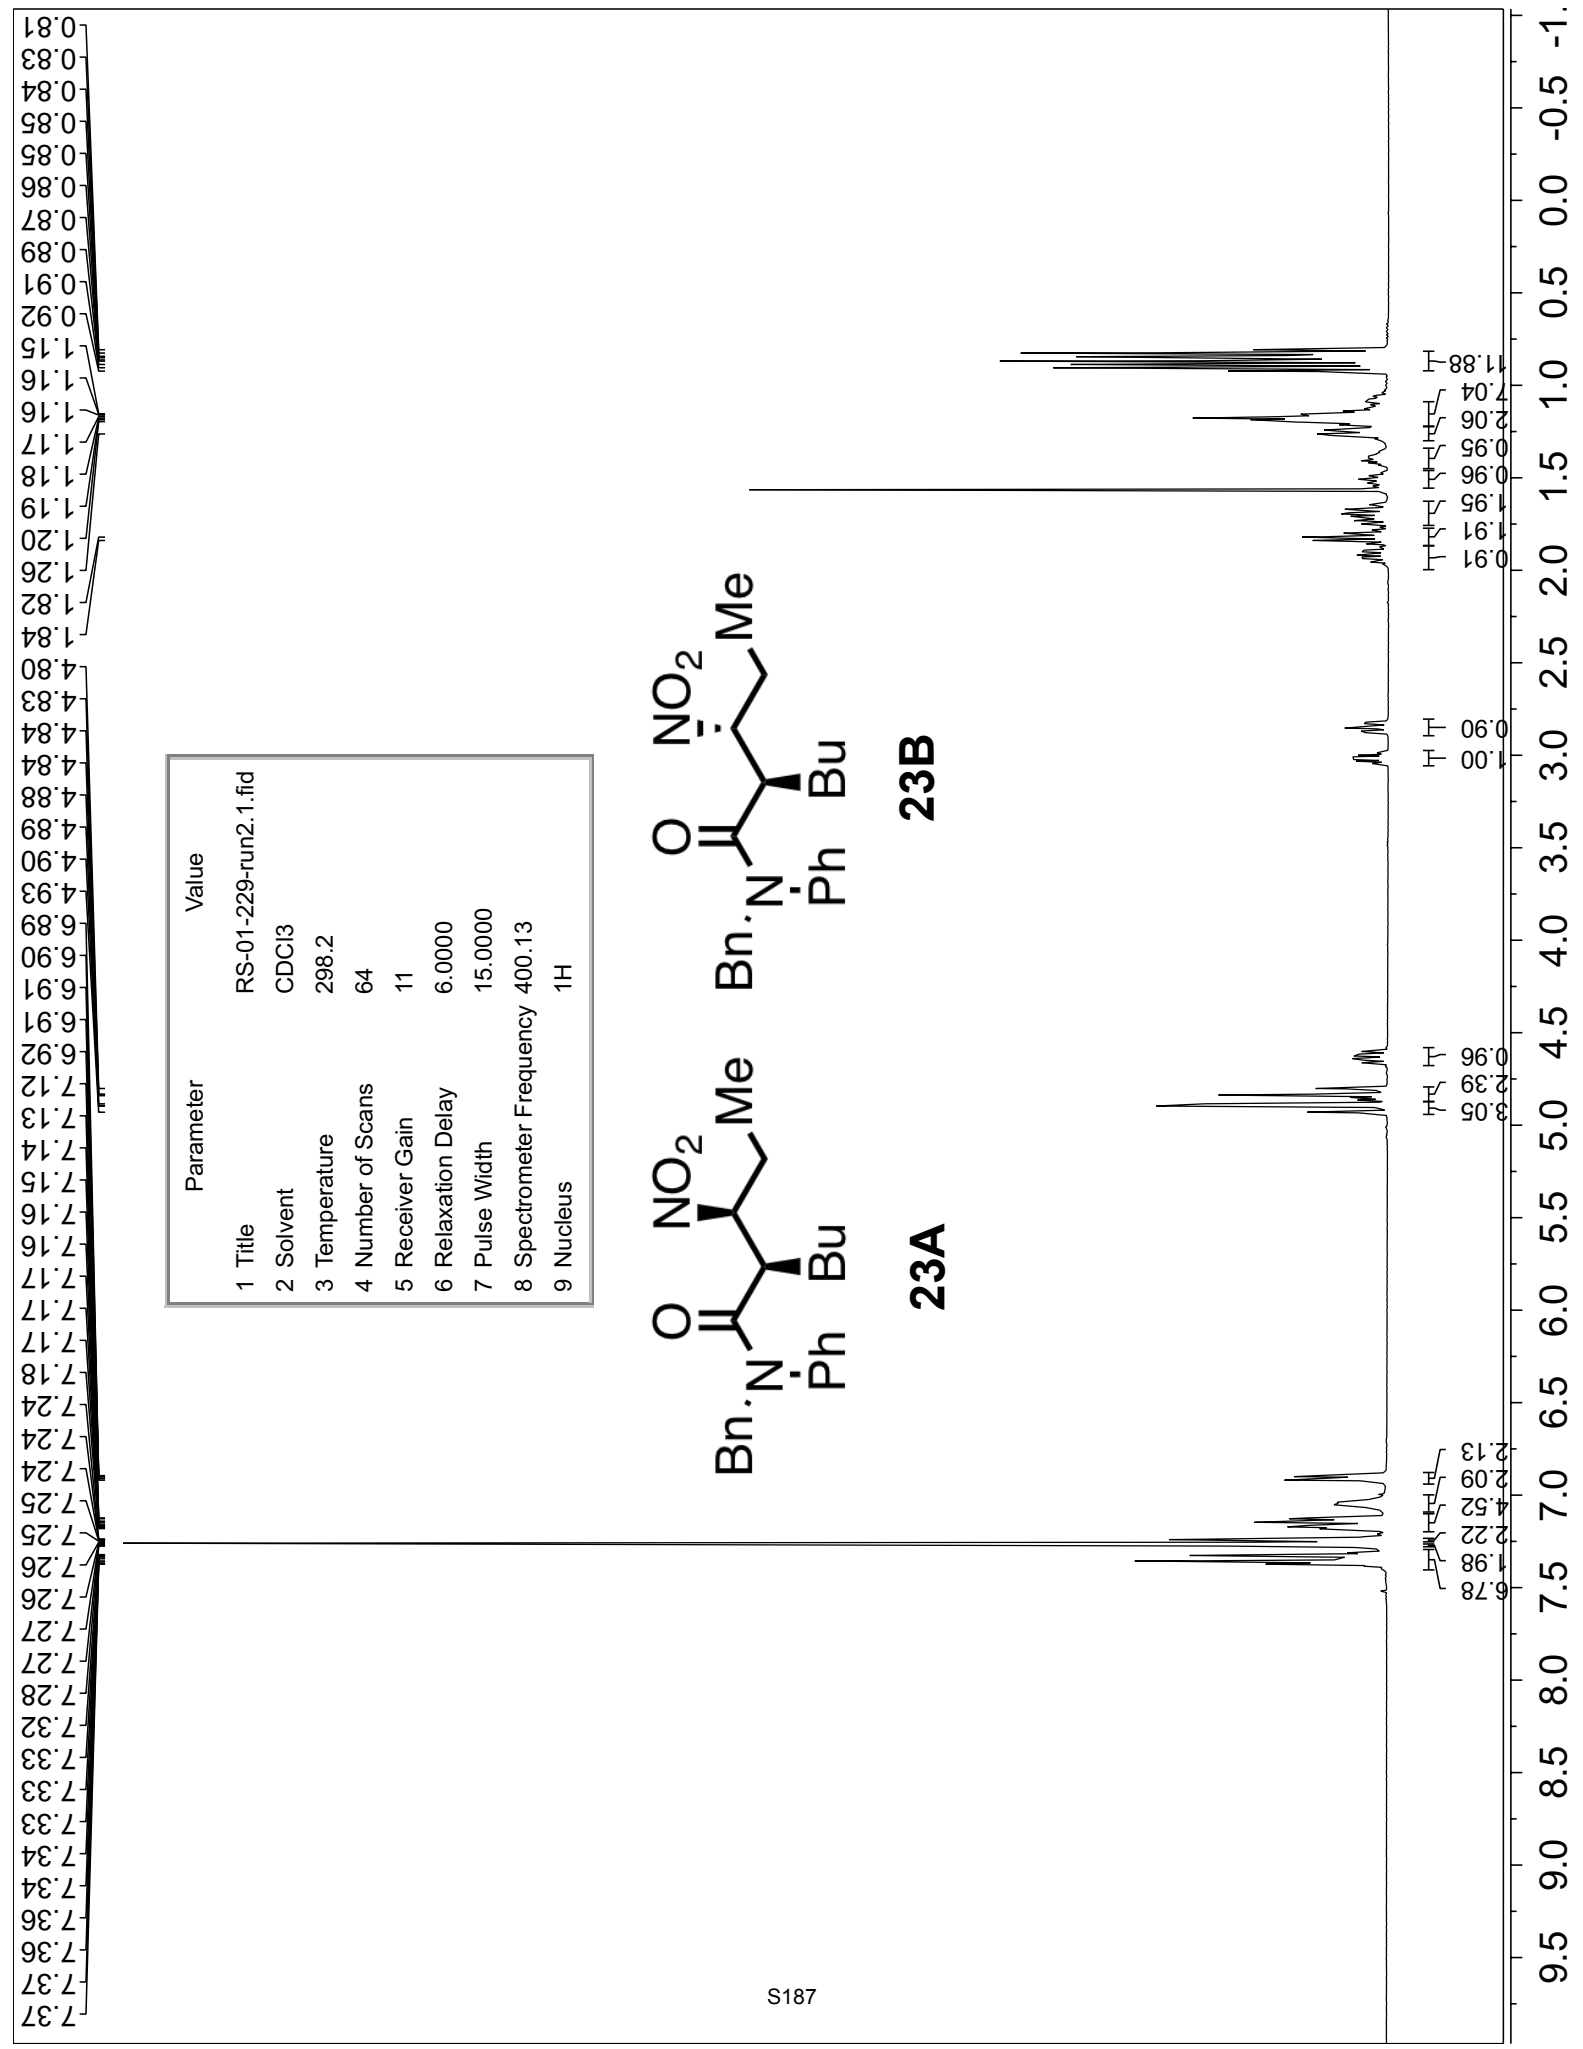

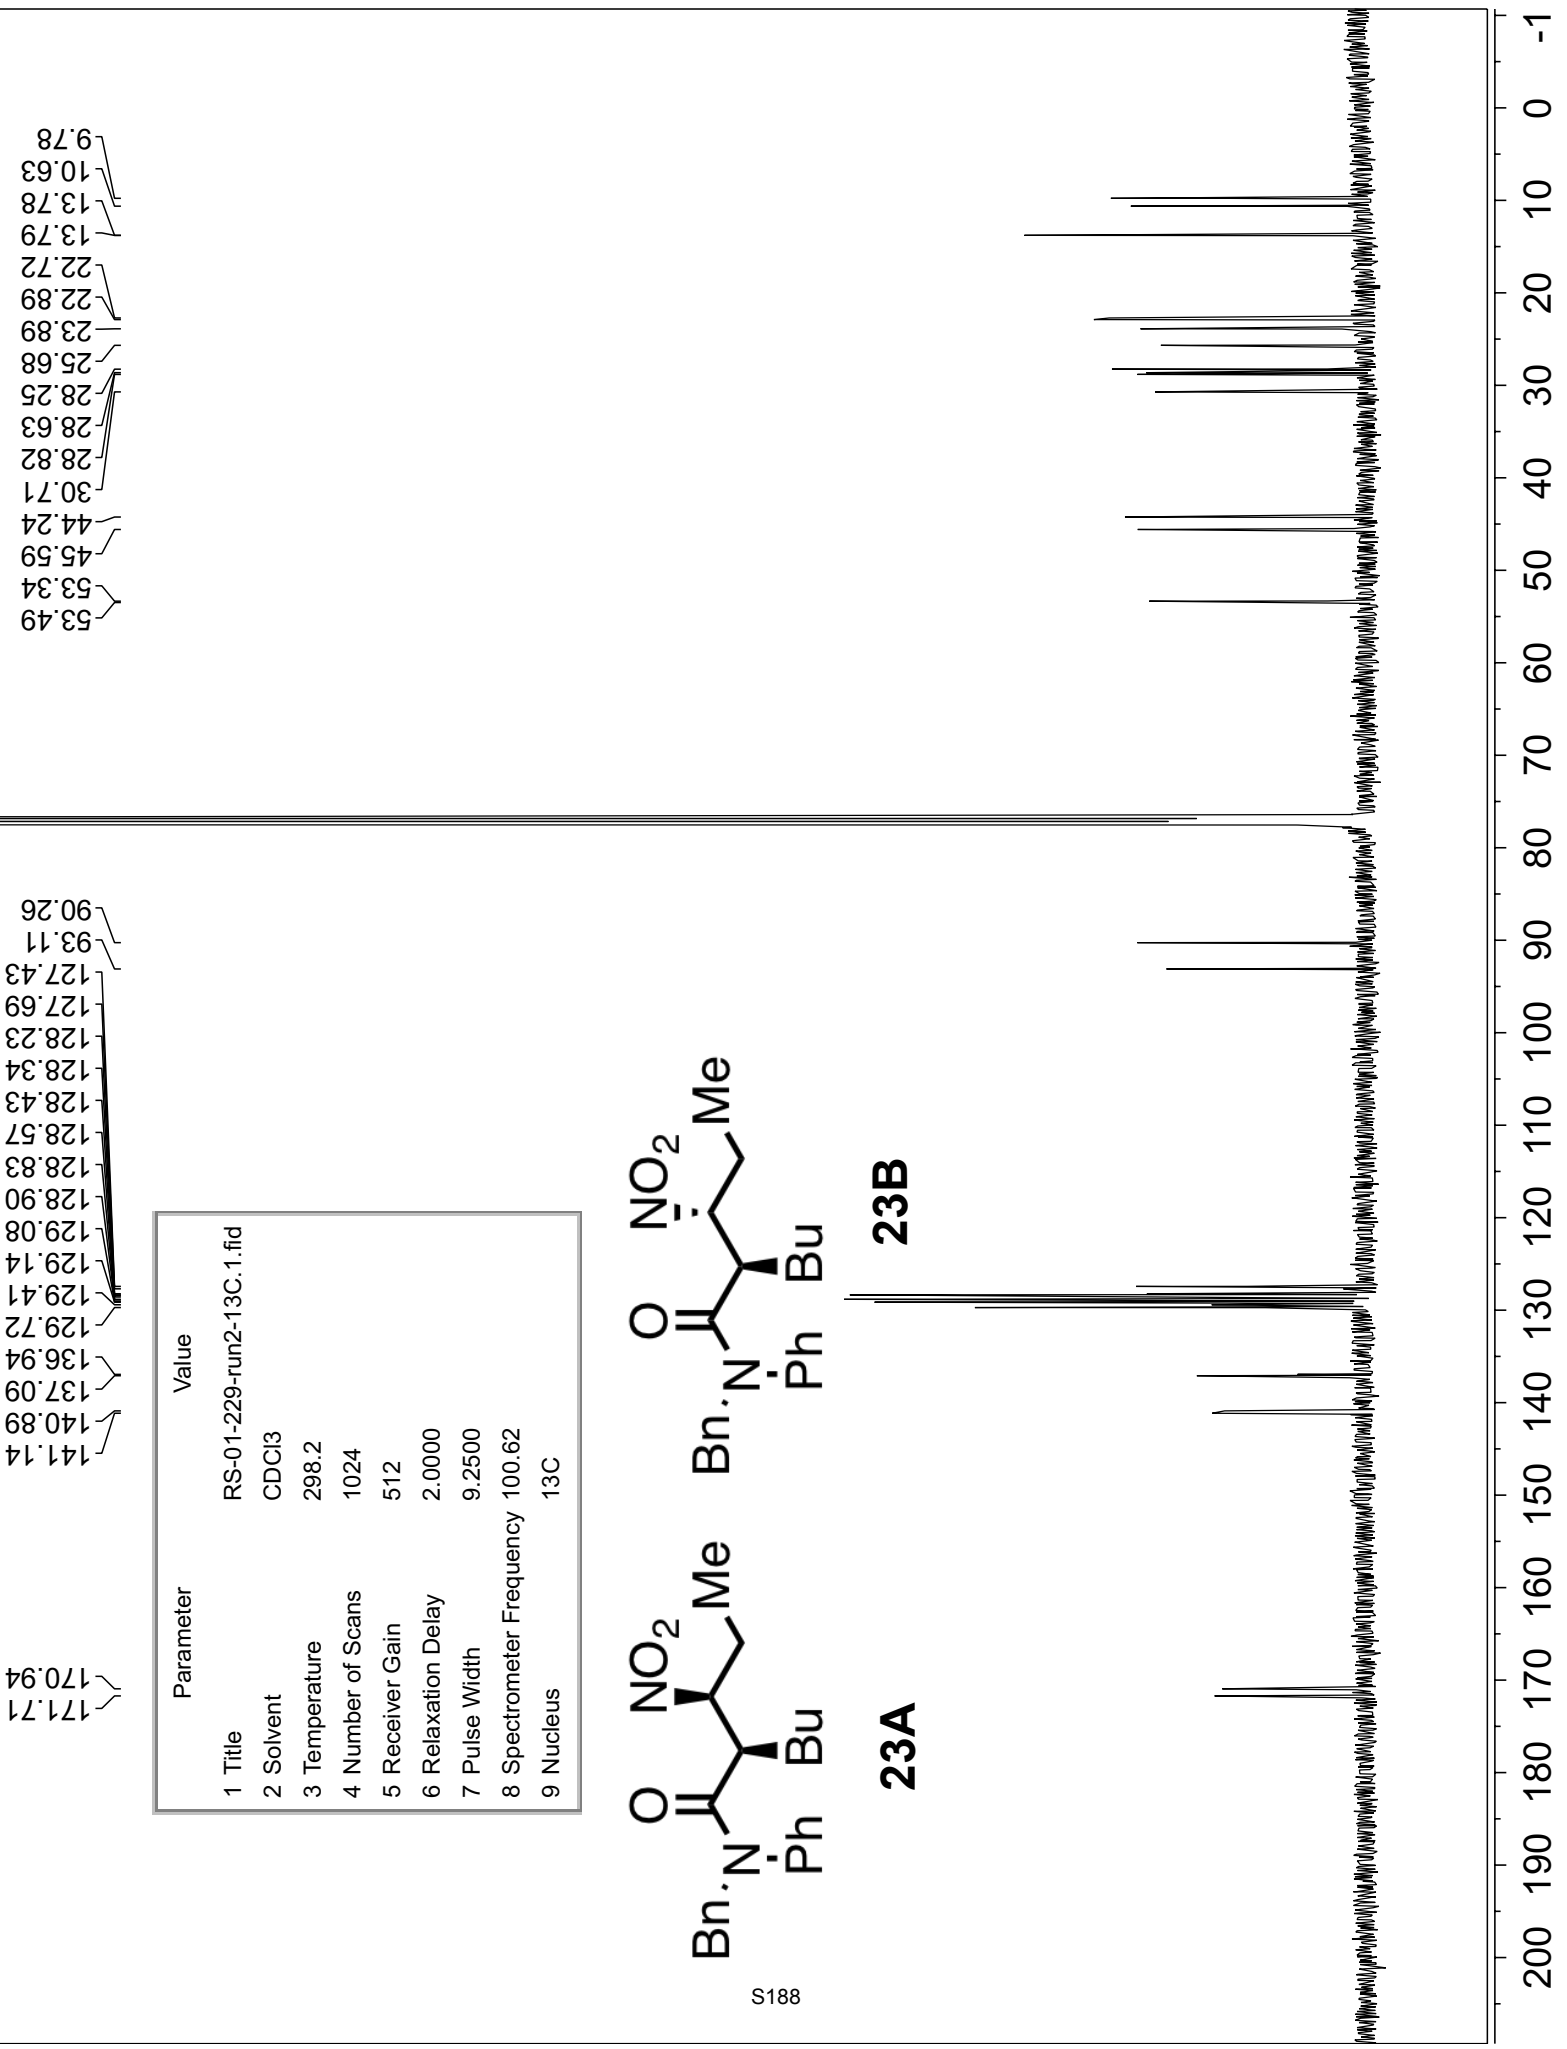

| Parameter                | Value                    |
|--------------------------|--------------------------|
| 1 Title                  | RS-01-229-run2-13C.1.fid |
| 2 Solvent                | CDCl3                    |
| 3 Temperature            | 298.2                    |
| 4 Number of Scans        | 1024                     |
| 5 Receiver Gain          | 512                      |
| 6 Relaxation Delay       | 2.0000                   |
| 7 Pulse Width            | 9.2500                   |
| 8 Spectrometer Frequency | 100.62                   |
| 9 Nucleus                | 13C                      |

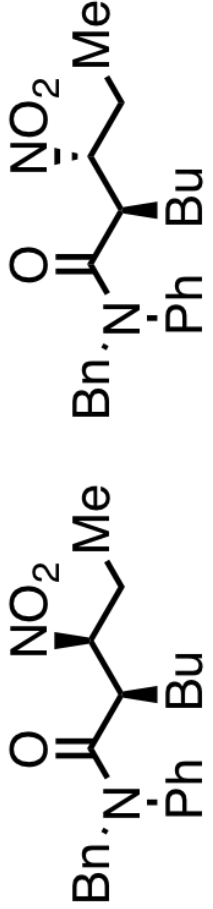

9.78  
10.63  
13.78  
13.79  
22.72  
22.89  
23.89  
25.68  
28.25  
28.63  
28.82  
30.71  
44.24  
45.59  
53.34  
53.49

90.26  
93.11  
127.43  
127.69  
128.23  
128.34  
128.43  
128.57  
128.83  
128.90  
129.08  
129.14  
129.41  
129.72  
136.94  
137.09  
140.89  
141.14

171.71  
170.94

23B

23A

| Parameter                | Value                   |
|--------------------------|-------------------------|
| 1 Title                  | DVR05049CRD CDCL3.1.fid |
| 2 Solvent                | CDCl3                   |
| 3 Temperature            | 298.2                   |
| 4 Number of Scans        | 16                      |
| 5 Receiver Gain          | 10                      |
| 6 Relaxation Delay       | 1.0000                  |
| 7 Pulse Width            | 15.0000                 |
| 8 Spectrometer Frequency | 400.13                  |
| 9 Nucleus                | <sup>1</sup> H          |

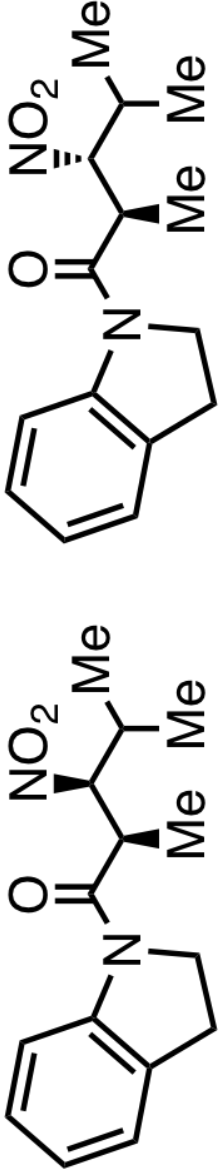

**Crude**

**24A**

**24B**

96:04

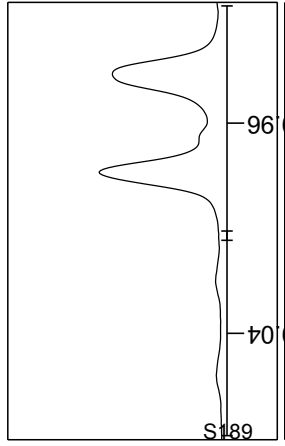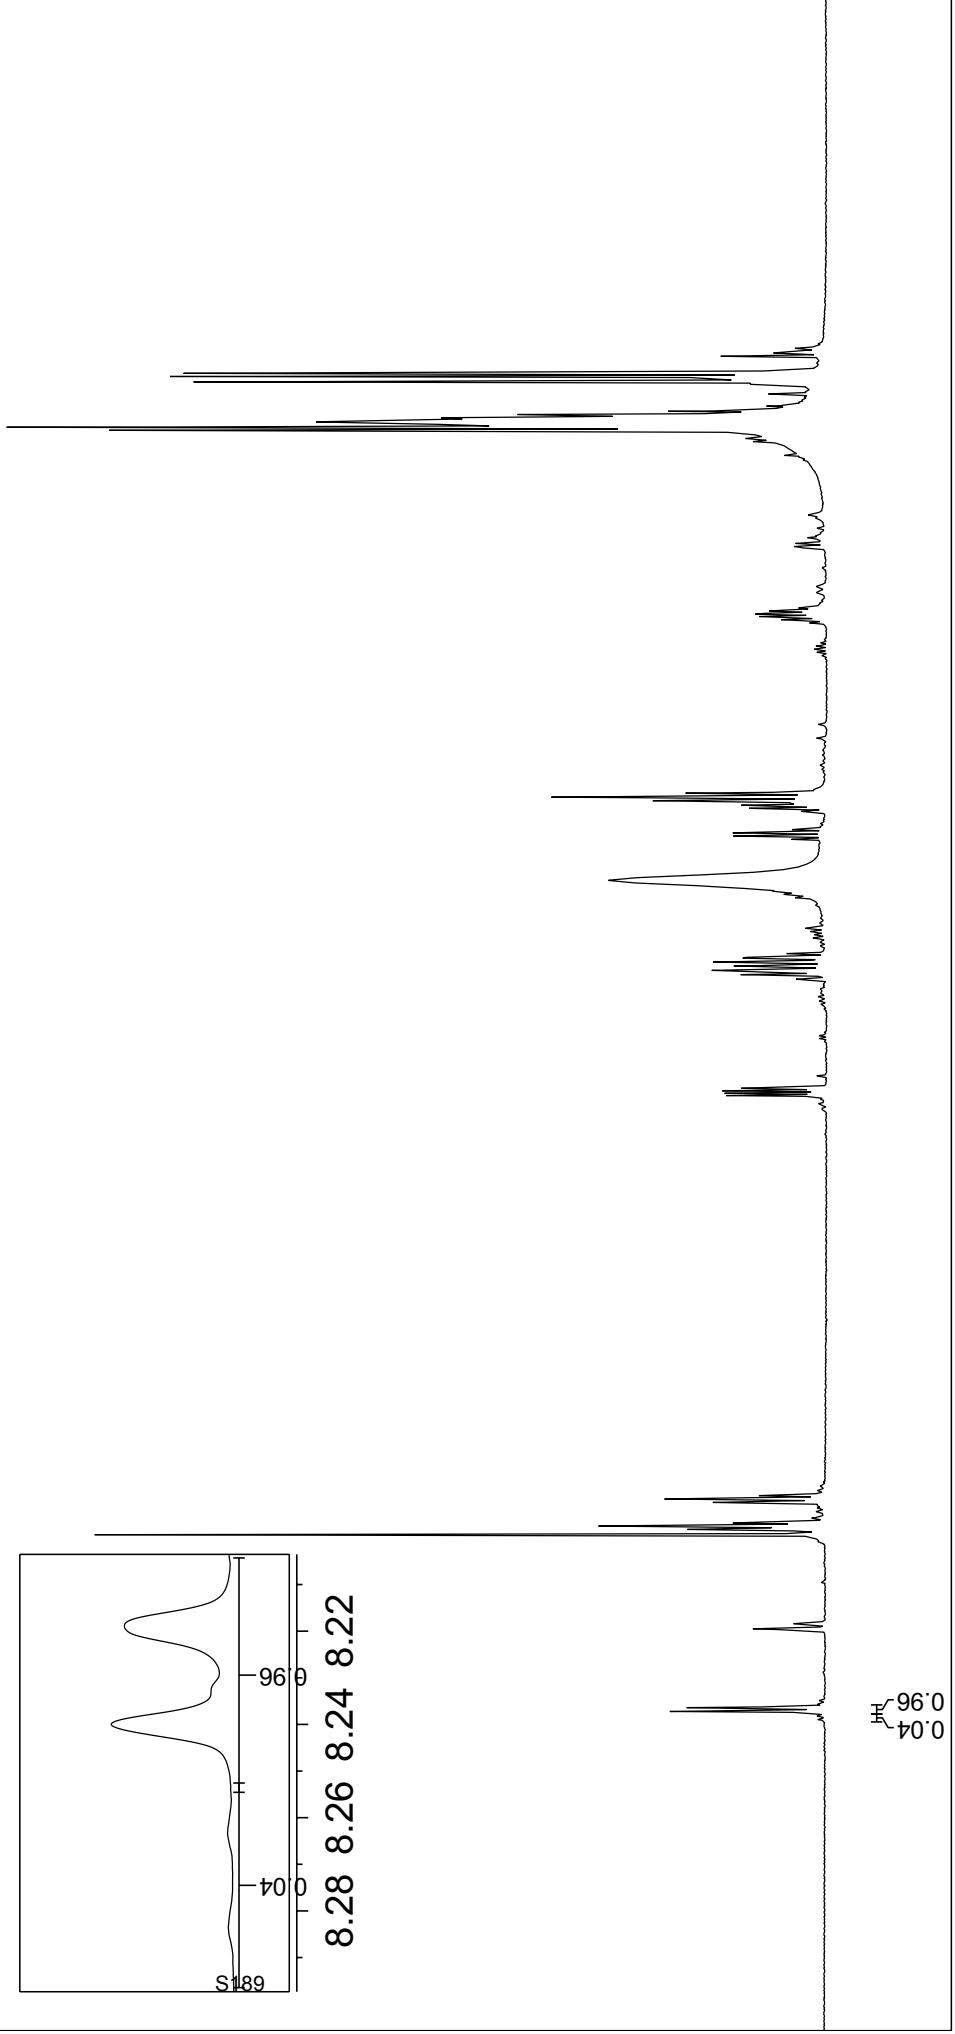

9.5 9.0 8.5 8.0 7.5 7.0 6.5 6.0 5.5 5.0 4.5 4.0 3.5 3.0 2.5 2.0 1.5 1.0 0.5 0.0 -0.5 -1.0

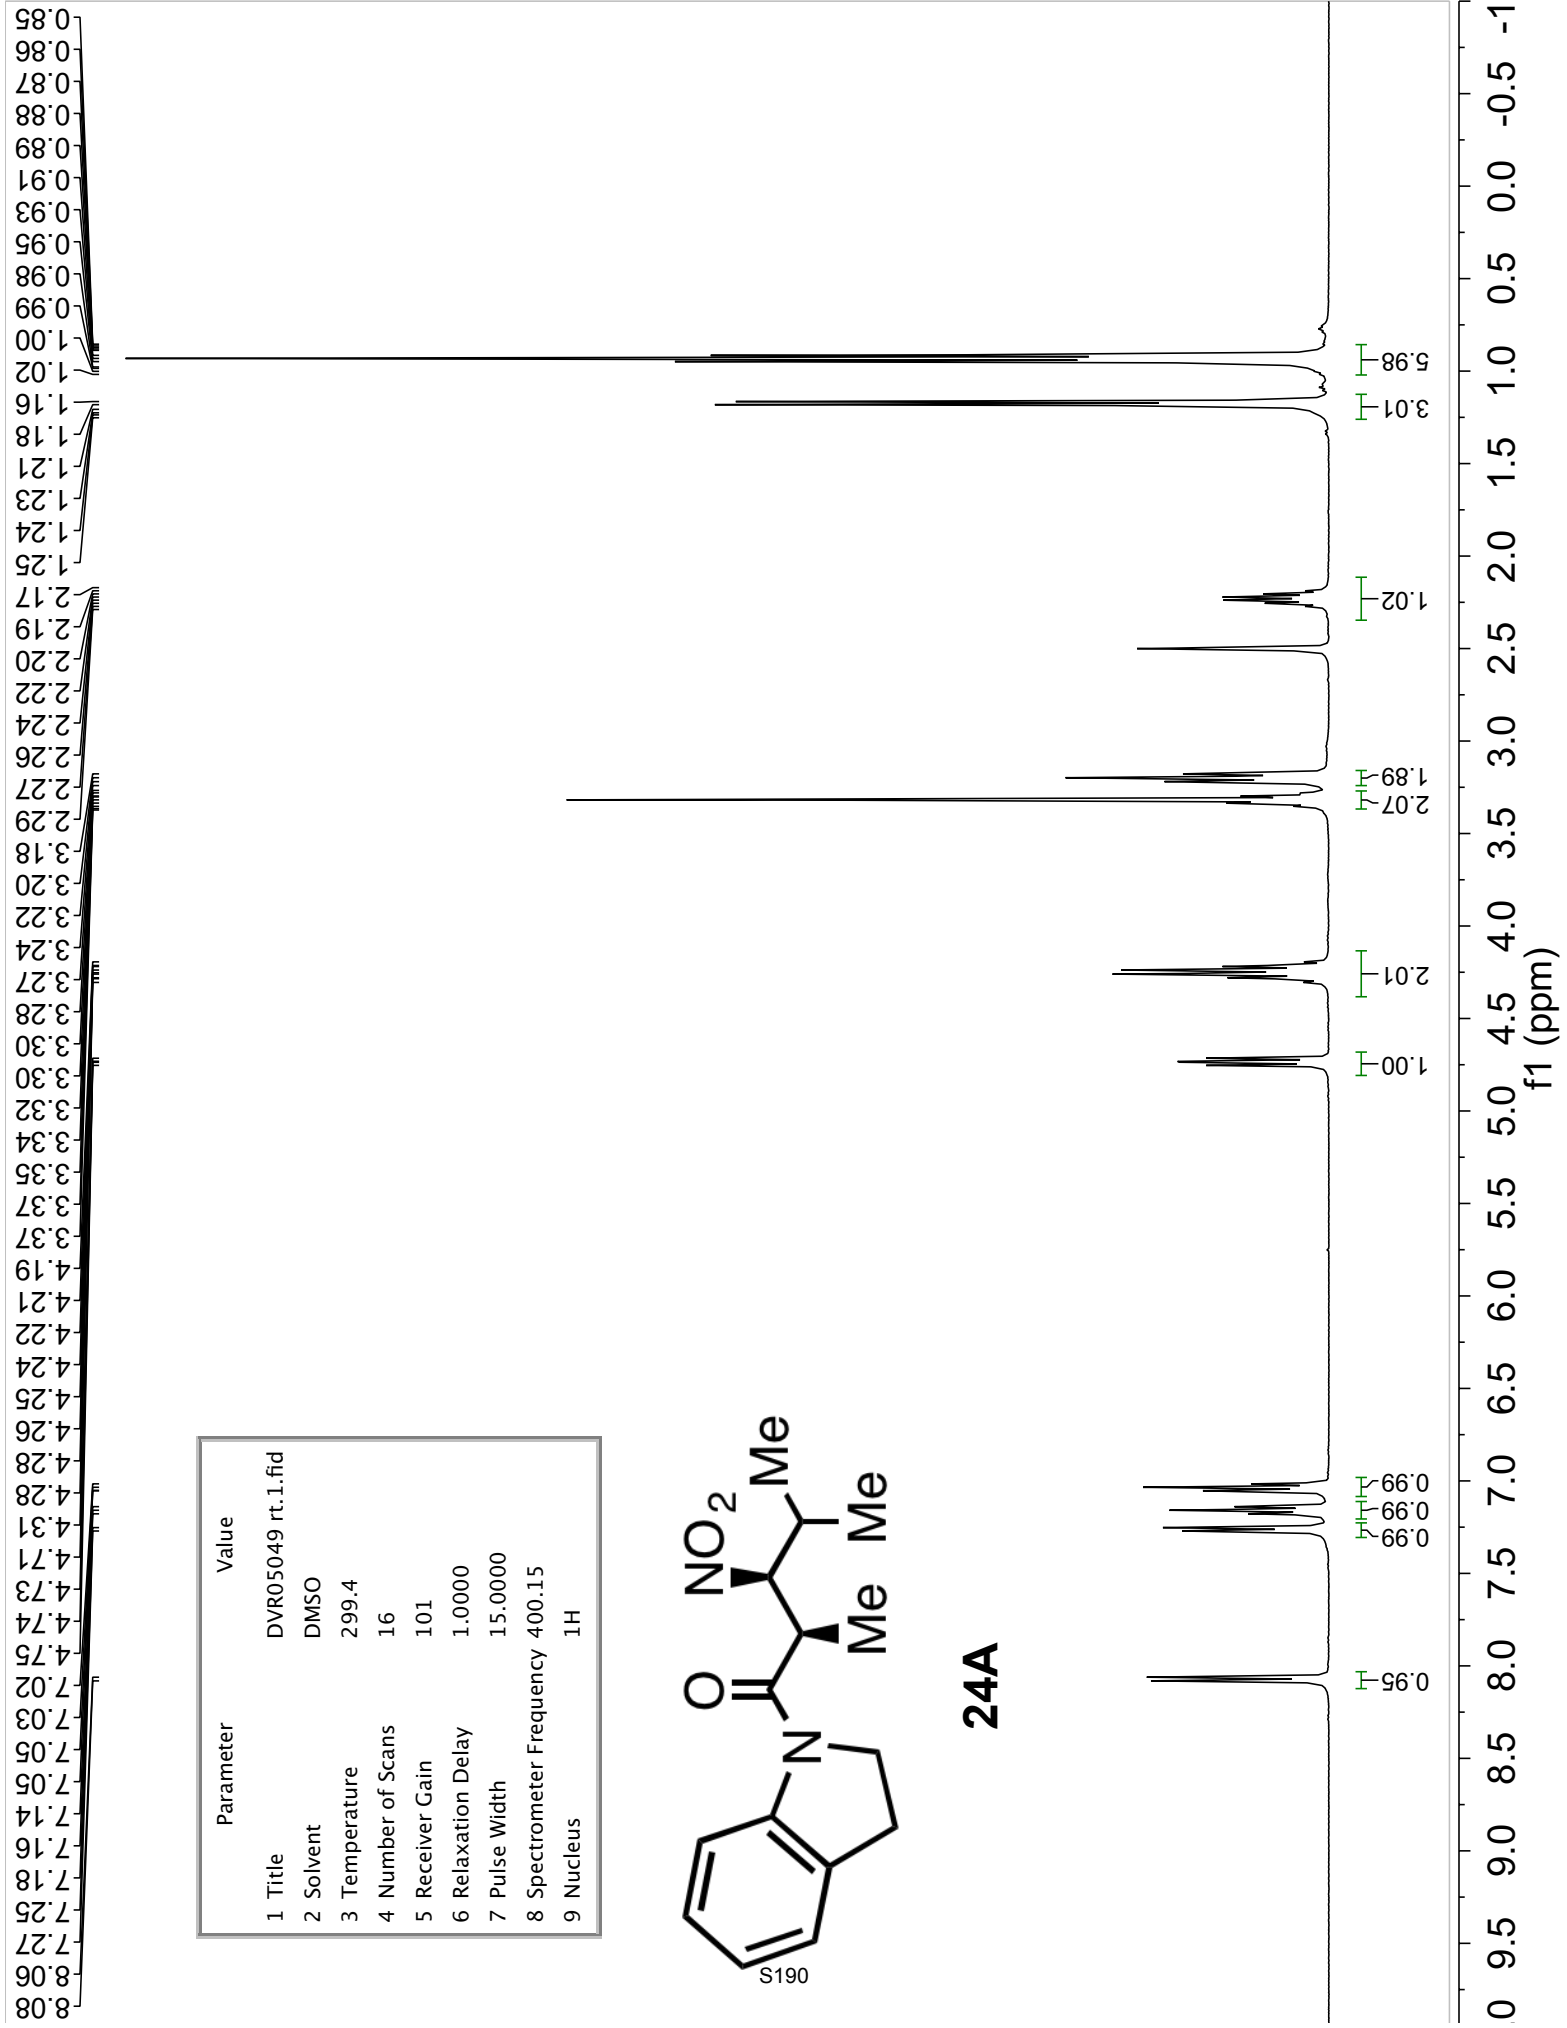

| Parameter                | Value                   |
|--------------------------|-------------------------|
| 1 Title                  | DVR05049 dimso RT.1.fid |
| 2 Solvent                | DMSO                    |
| 3 Temperature            | 298.2                   |
| 4 Number of Scans        | 1024                    |
| 5 Receiver Gain          | 512                     |
| 6 Relaxation Delay       | 3.0000                  |
| 7 Pulse Width            | 9.2500                  |
| 8 Spectrometer Frequency | 100.62                  |
| 9 Nucleus                | <sup>13</sup> C         |

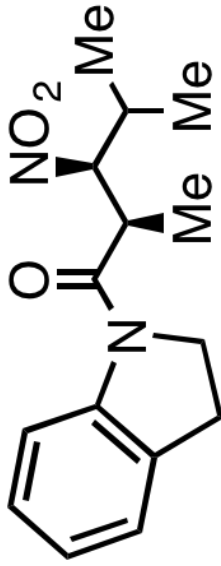

24A

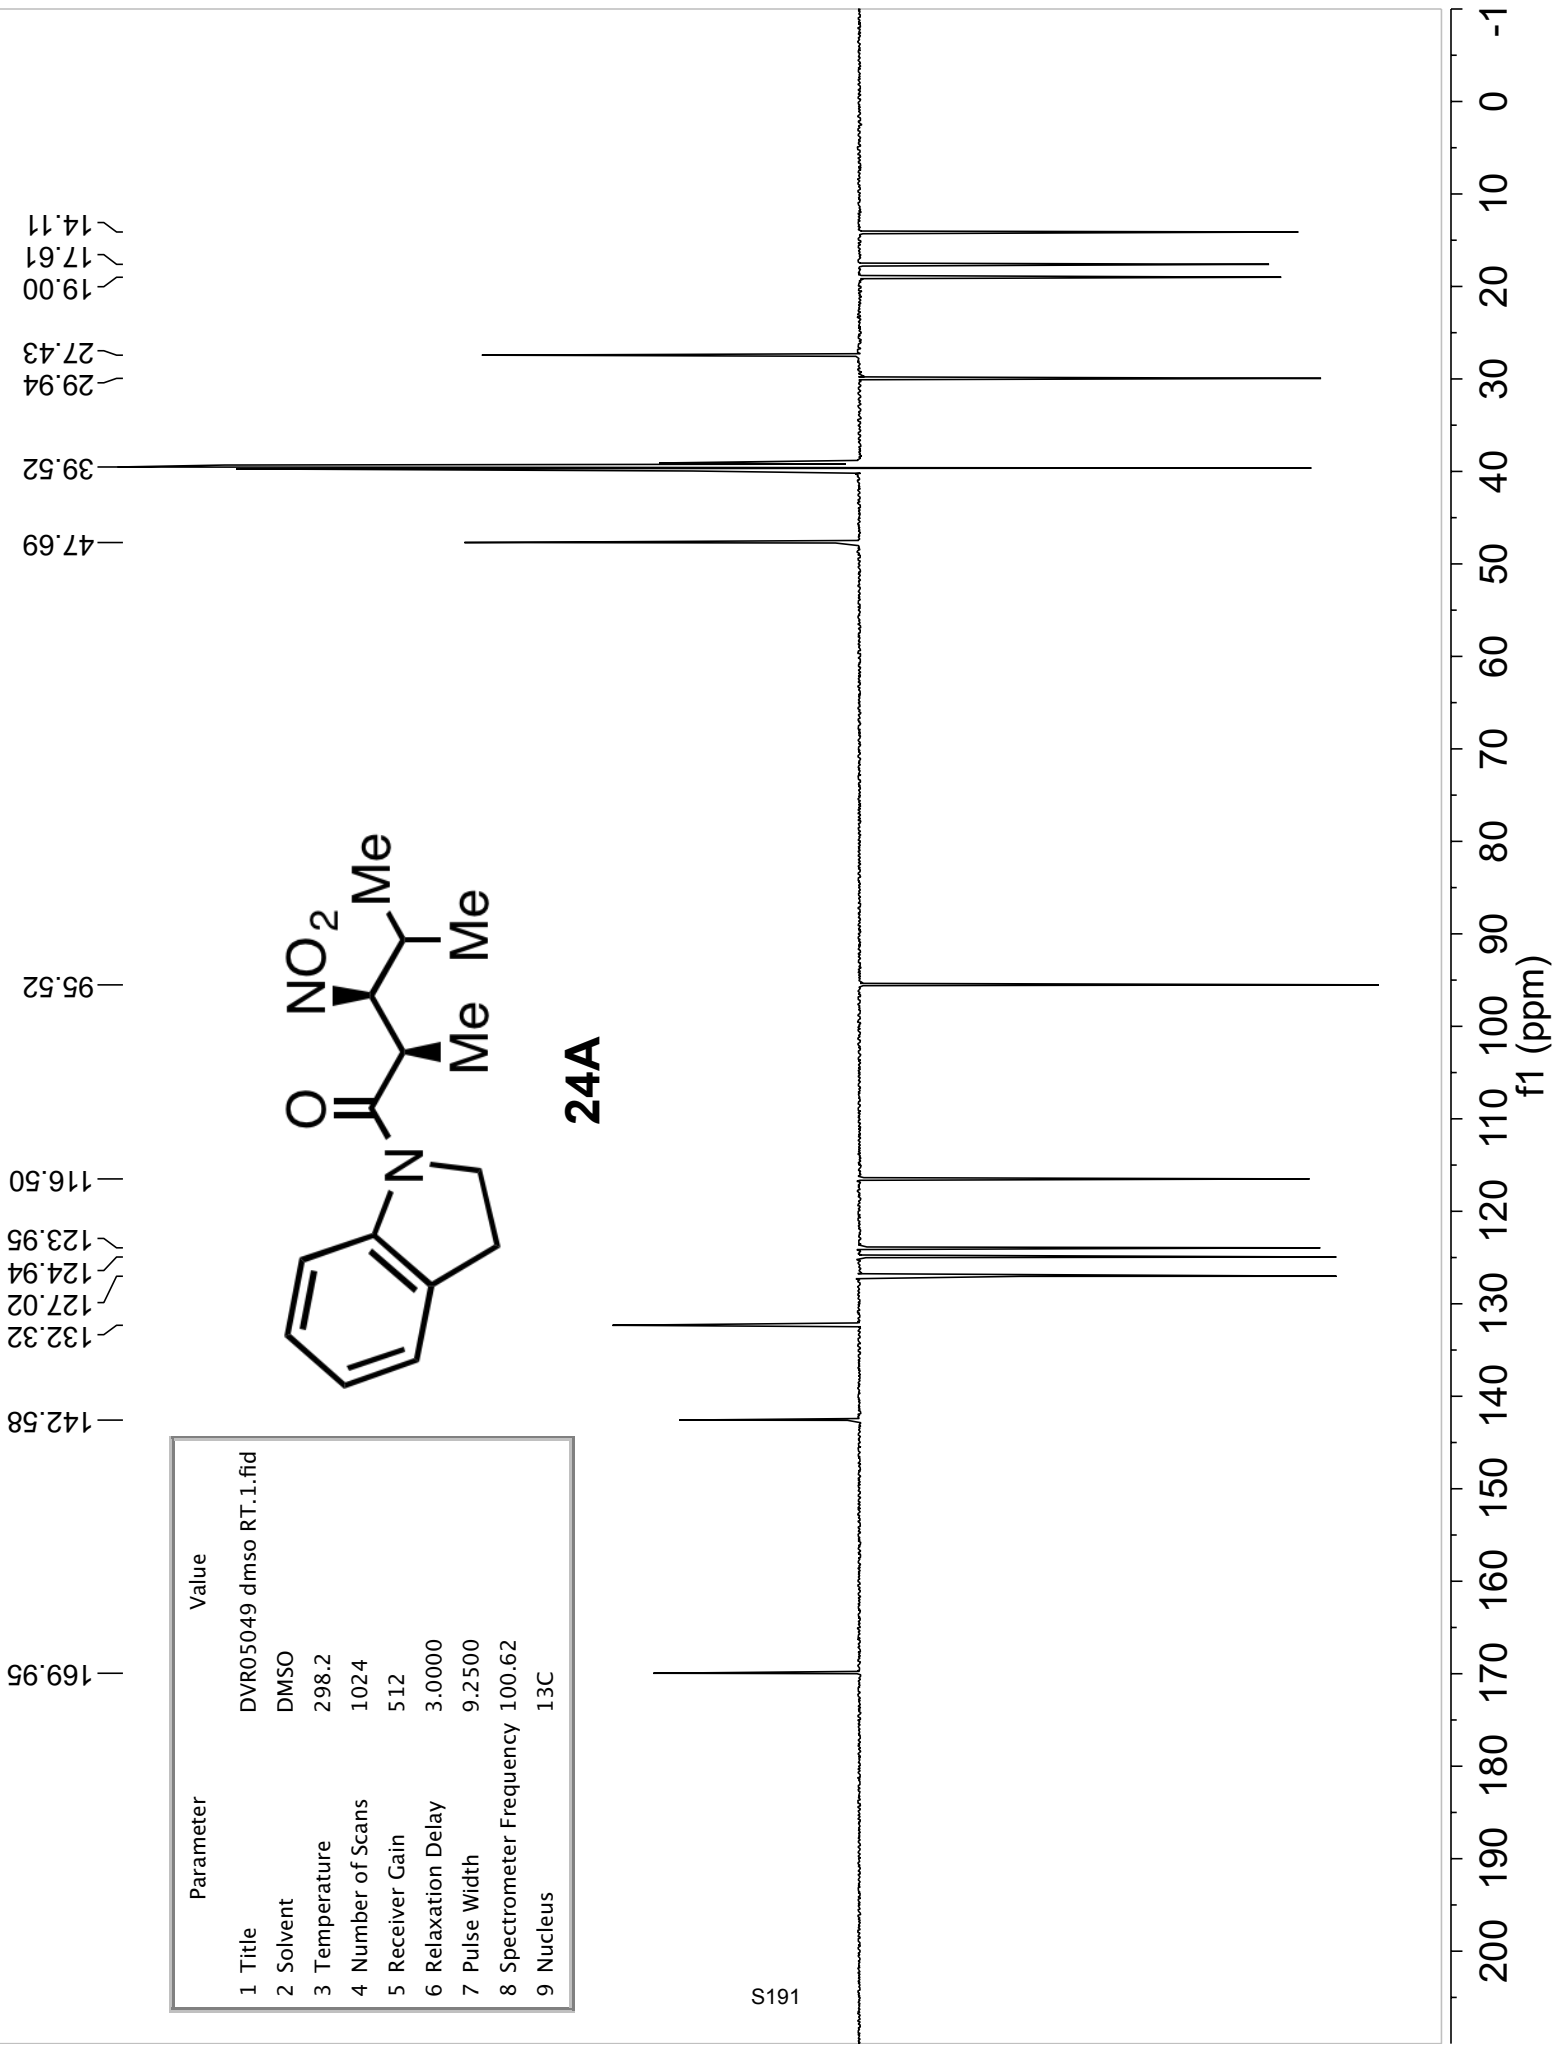

| Parameter                | Value             |
|--------------------------|-------------------|
| 1 Title                  | DVR05024CRD.1.fid |
| 2 Solvent                | CDCl3             |
| 3 Temperature            | 298.0             |
| 4 Number of Scans        | 16                |
| 5 Receiver Gain          | 161               |
| 6 Relaxation Delay       | 1.0000            |
| 7 Pulse Width            | 13.5000           |
| 8 Spectrometer Frequency | 600.32            |
| 9 Nucleus                | <sup>1</sup> H    |

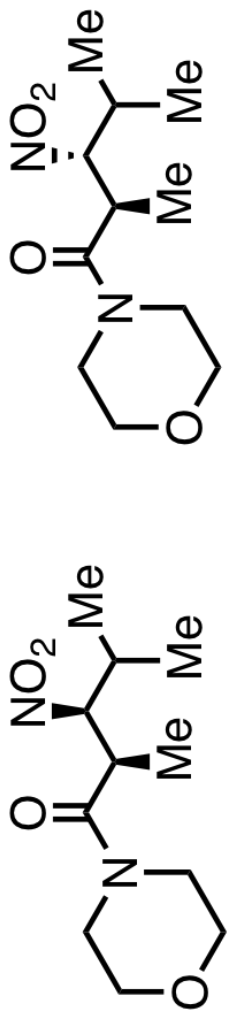

**Crude**  
**92:08**

**25A**

**25B**

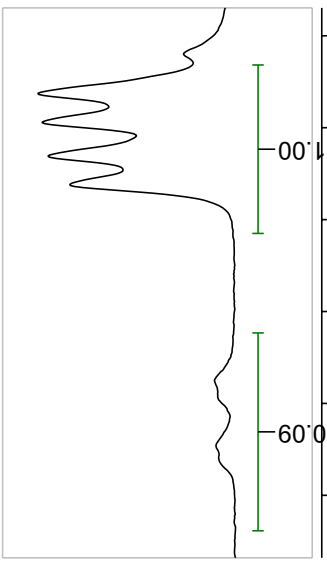

S192

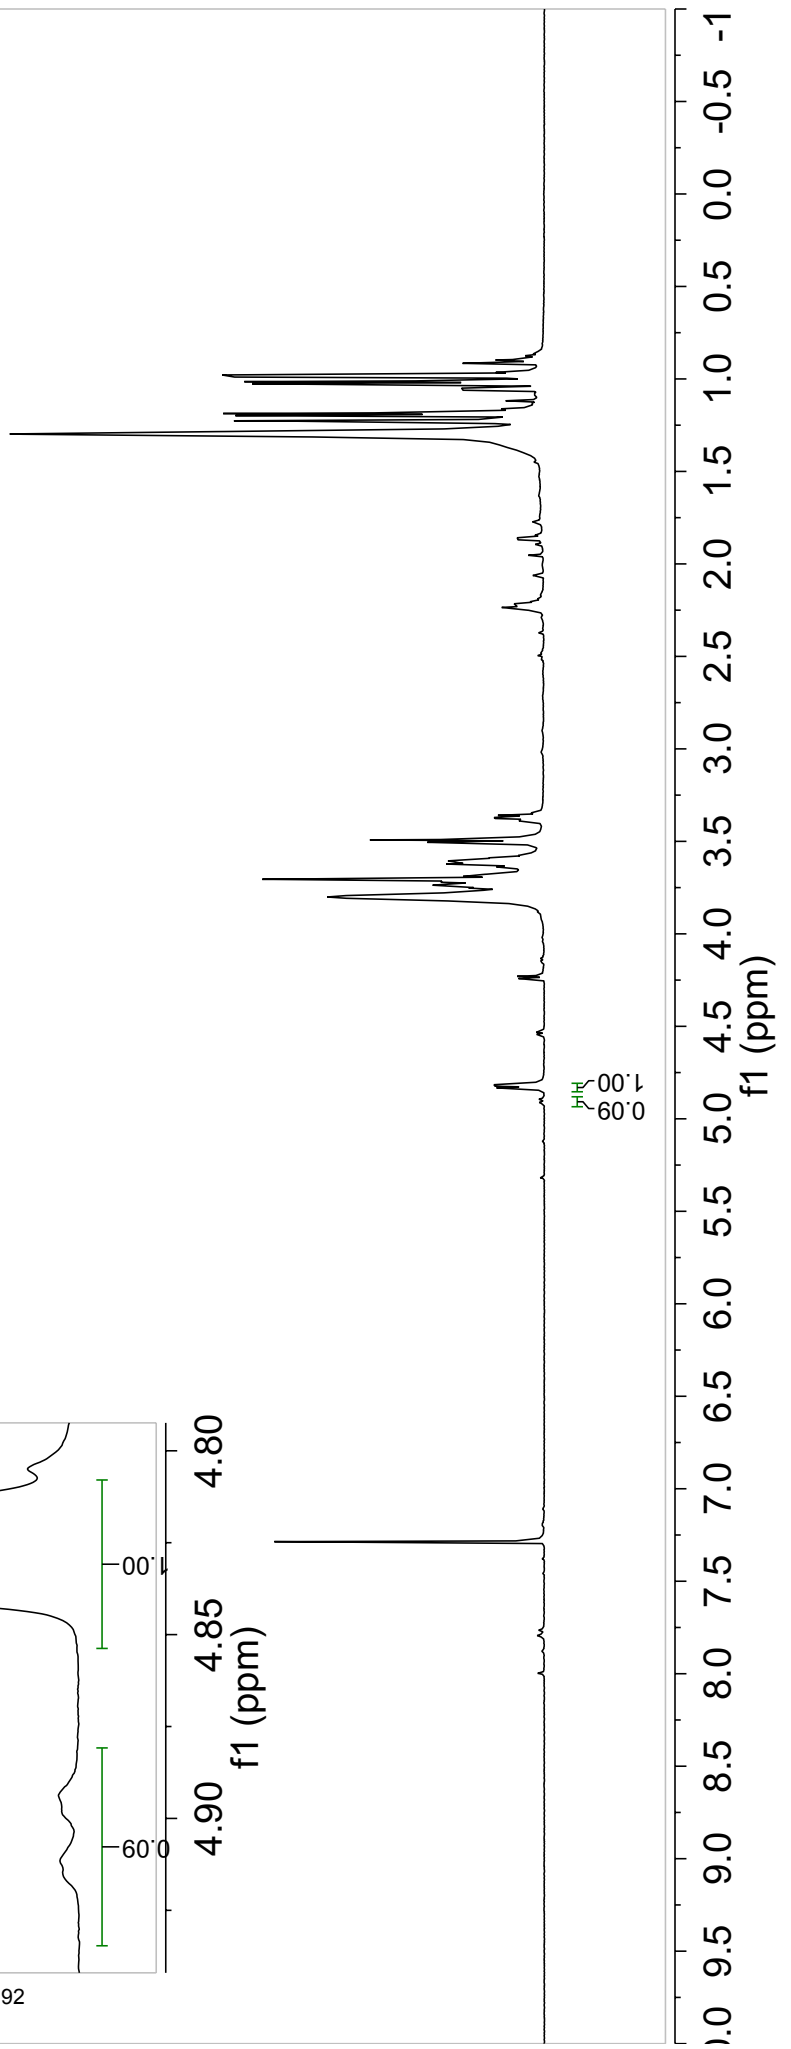



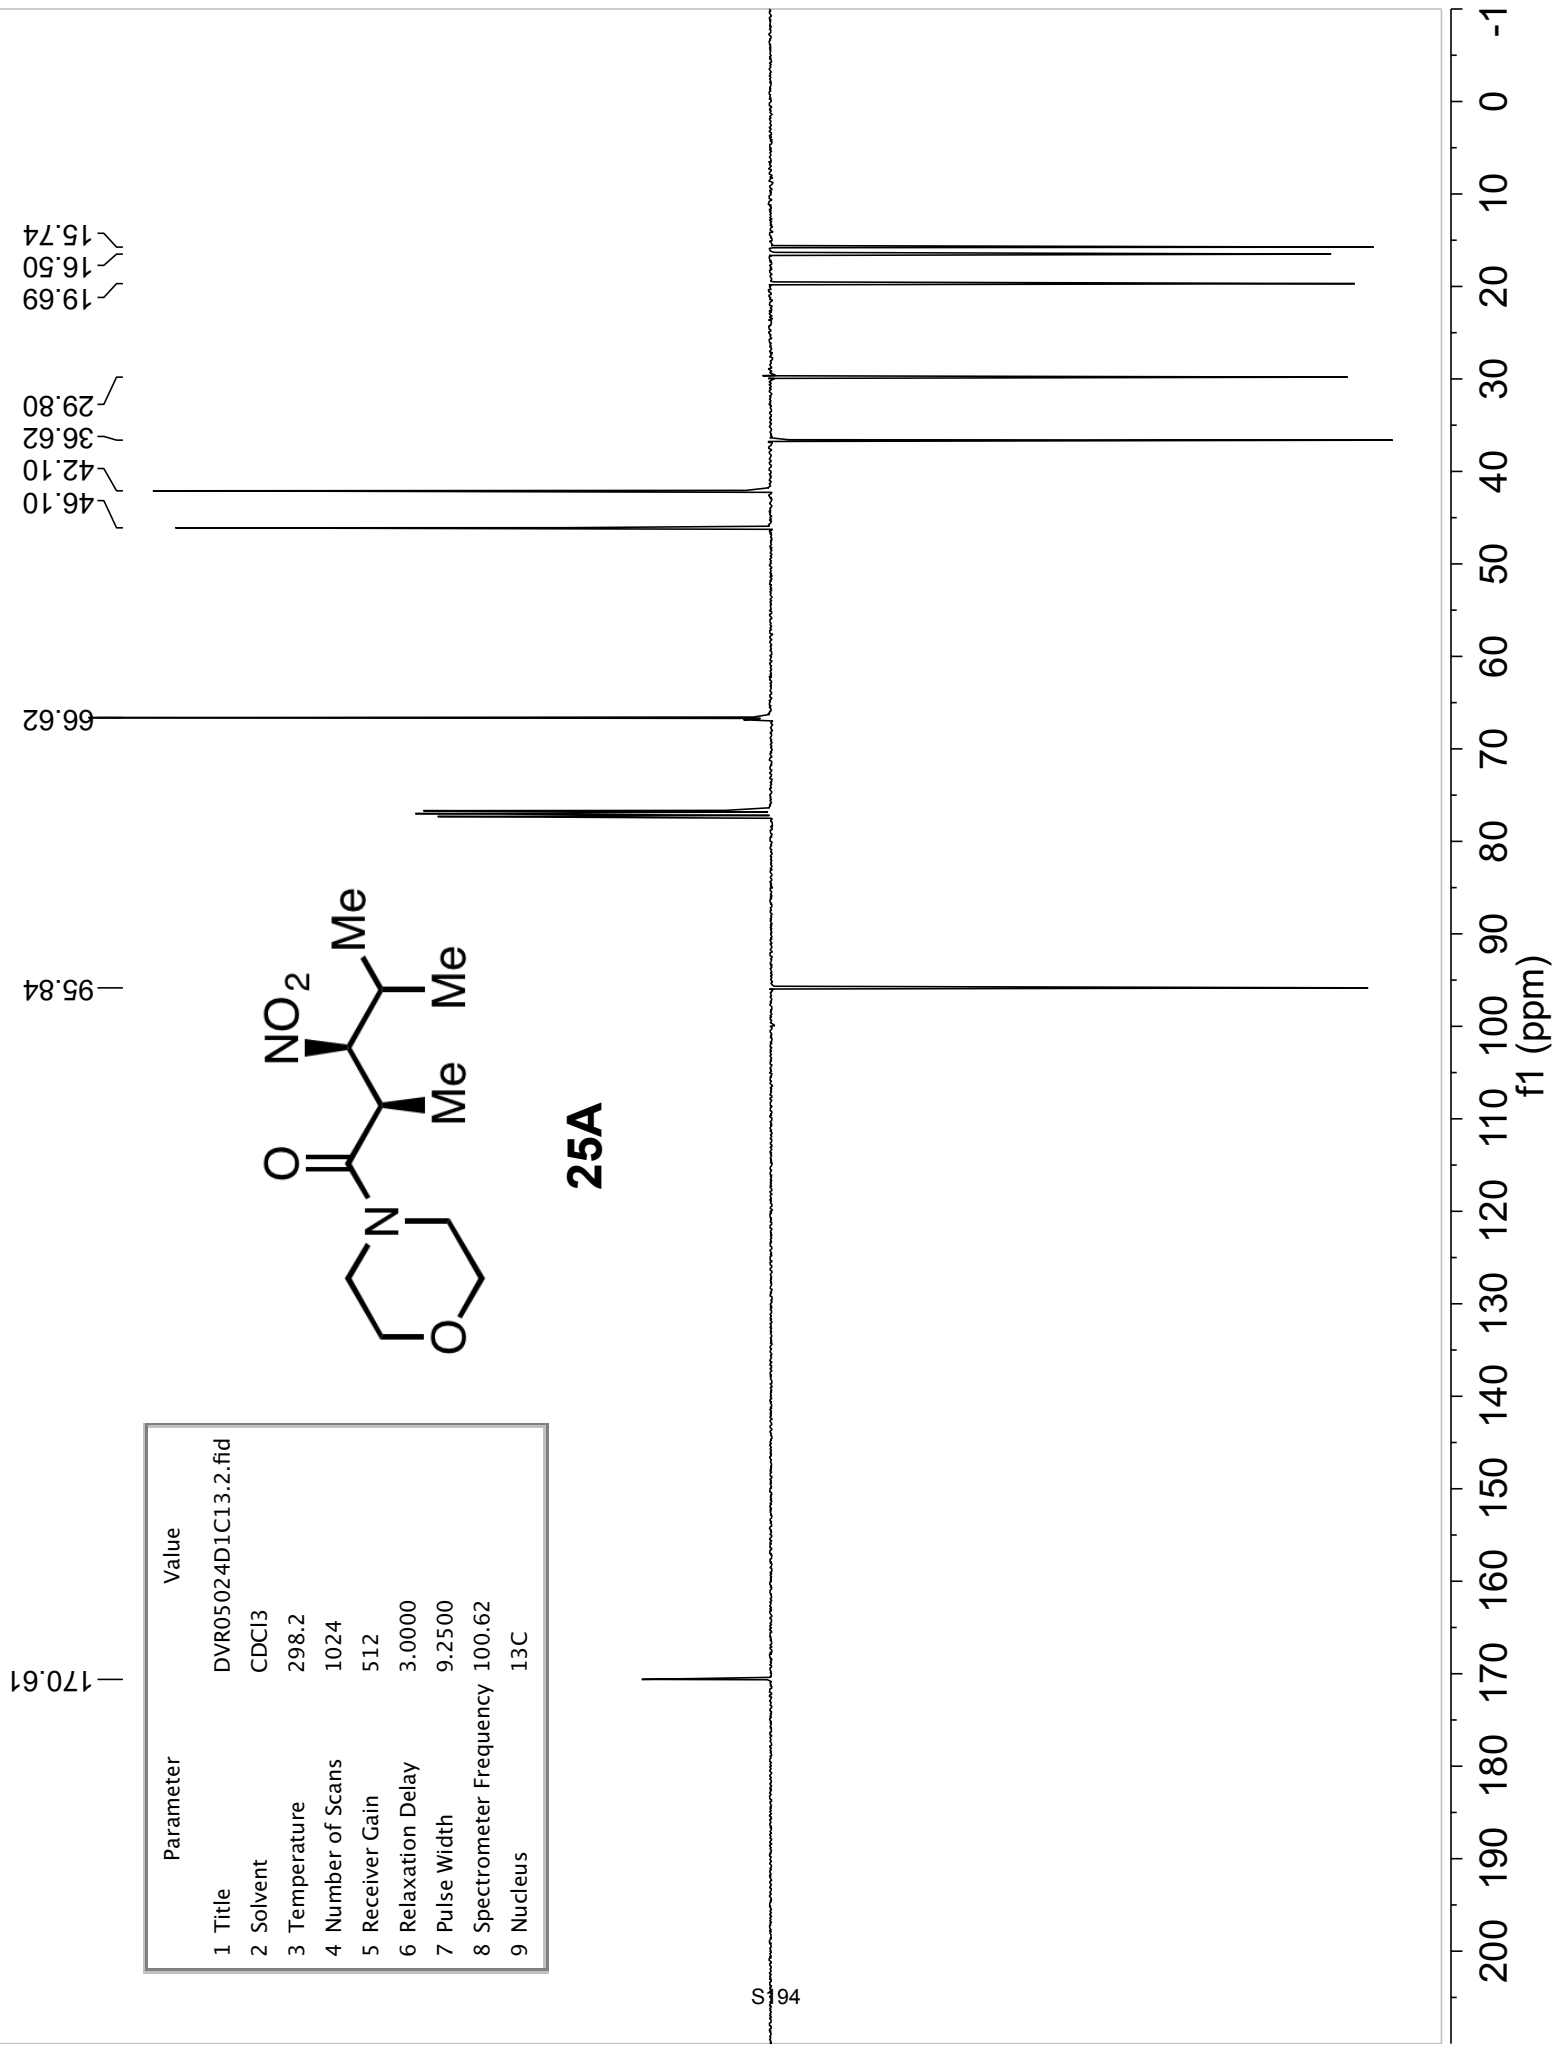



| Parameter                | Value             |
|--------------------------|-------------------|
| 1 Title                  | DVR05052crd.1.fid |
| 2 Solvent                | CDCl3             |
| 3 Temperature            | 297.7             |
| 4 Number of Scans        | 16                |
| 5 Receiver Gain          | 203               |
| 6 Relaxation Delay       | 1.0000            |
| 7 Pulse Width            | 15.0000           |
| 8 Spectrometer Frequency | 400.15            |
| 9 Nucleus                | <sup>1</sup> H    |

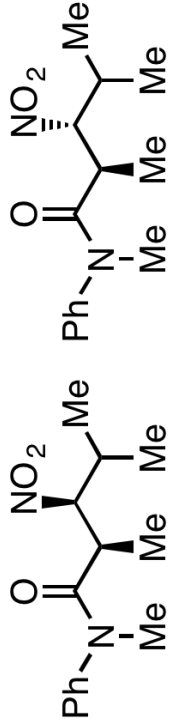

**Crude**

**26A**

**91:09**

**26B**

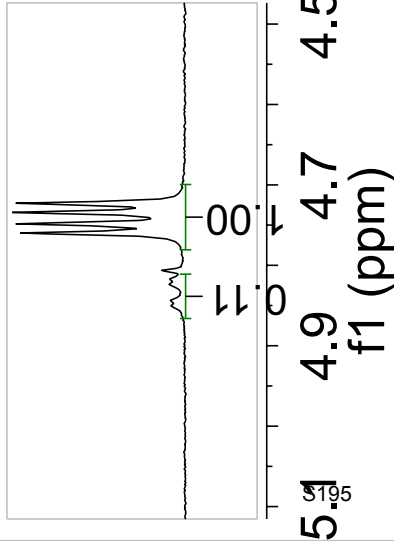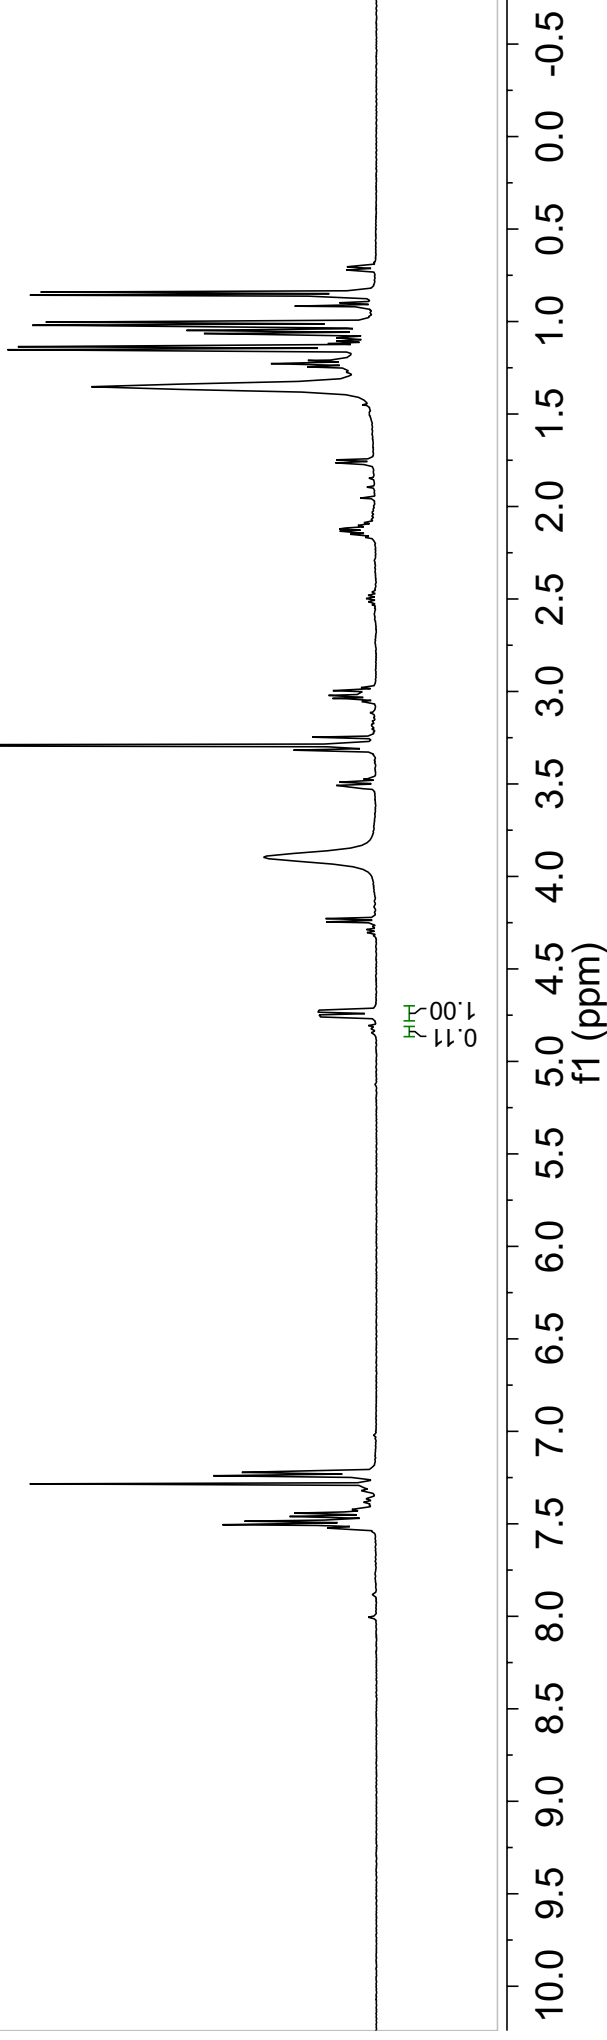

7.50 7.50 7.49 7.49 7.48 7.48 7.48 7.48 7.49 7.49 7.50 7.50  
 7.44 7.44 7.44 7.44 7.45 7.45 7.46 7.46 7.46 7.46 7.48 7.48 7.48 7.48 7.49 7.49 7.50 7.50  
 7.43 7.43 7.42 7.42 7.41 7.41 7.40 7.40 7.40 7.40 7.22 7.22 7.21 7.21 7.20 7.20 7.19 7.19  
 4.74 4.74 4.73 4.73 4.71 4.71 4.70 4.70  
 3.27 3.03 3.01 3.00 2.99 2.98 2.98 2.97 2.95 2.16 2.14 2.13 2.12 2.11 2.11 2.10 2.09 2.08 2.07 2.06 2.06 2.04 2.04 1.13 1.11 0.99 0.98 0.83 0.81

| Parameter                | Value            |
|--------------------------|------------------|
| 1 Title                  | DVR05053D1.1.fid |
| 2 Solvent                | CDCl3            |
| 3 Temperature            | 298.1            |
| 4 Number of Scans        | 16               |
| 5 Receiver Gain          | 10               |
| 6 Relaxation Delay       | 1.0000           |
| 7 Pulse Width            | 15.0000          |
| 8 Spectrometer Frequency | 400.13           |
| 9 Nucleus                | <sup>1</sup> H   |

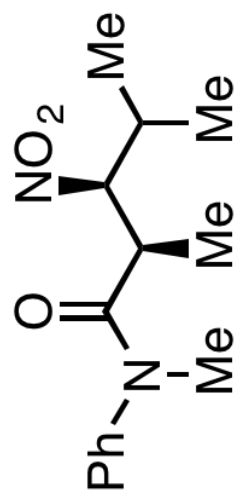

26A

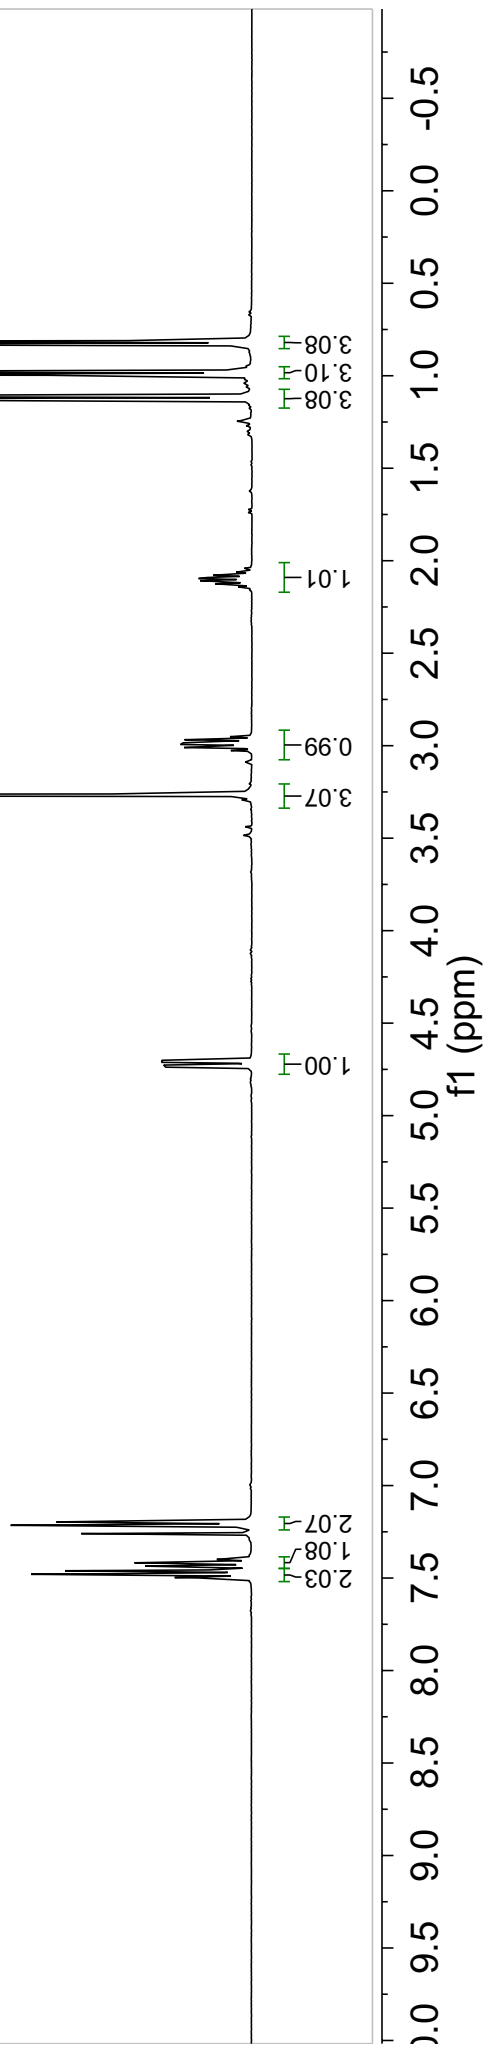

| Parameter                | Value                 |
|--------------------------|-----------------------|
| 1 Title                  | DVR0503D1 C13-A.1.fid |
| 2 Solvent                | CDCl3                 |
| 3 Temperature            | 298.2                 |
| 4 Number of Scans        | 32                    |
| 5 Receiver Gain          | 512                   |
| 6 Relaxation Delay       | 3.0000                |
| 7 Pulse Width            | 9.2500                |
| 8 Spectrometer Frequency | 100.62                |
| 9 Nucleus                | <sup>13</sup> C       |

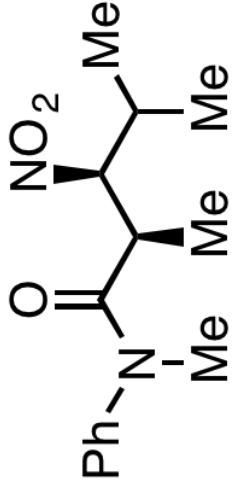

26A

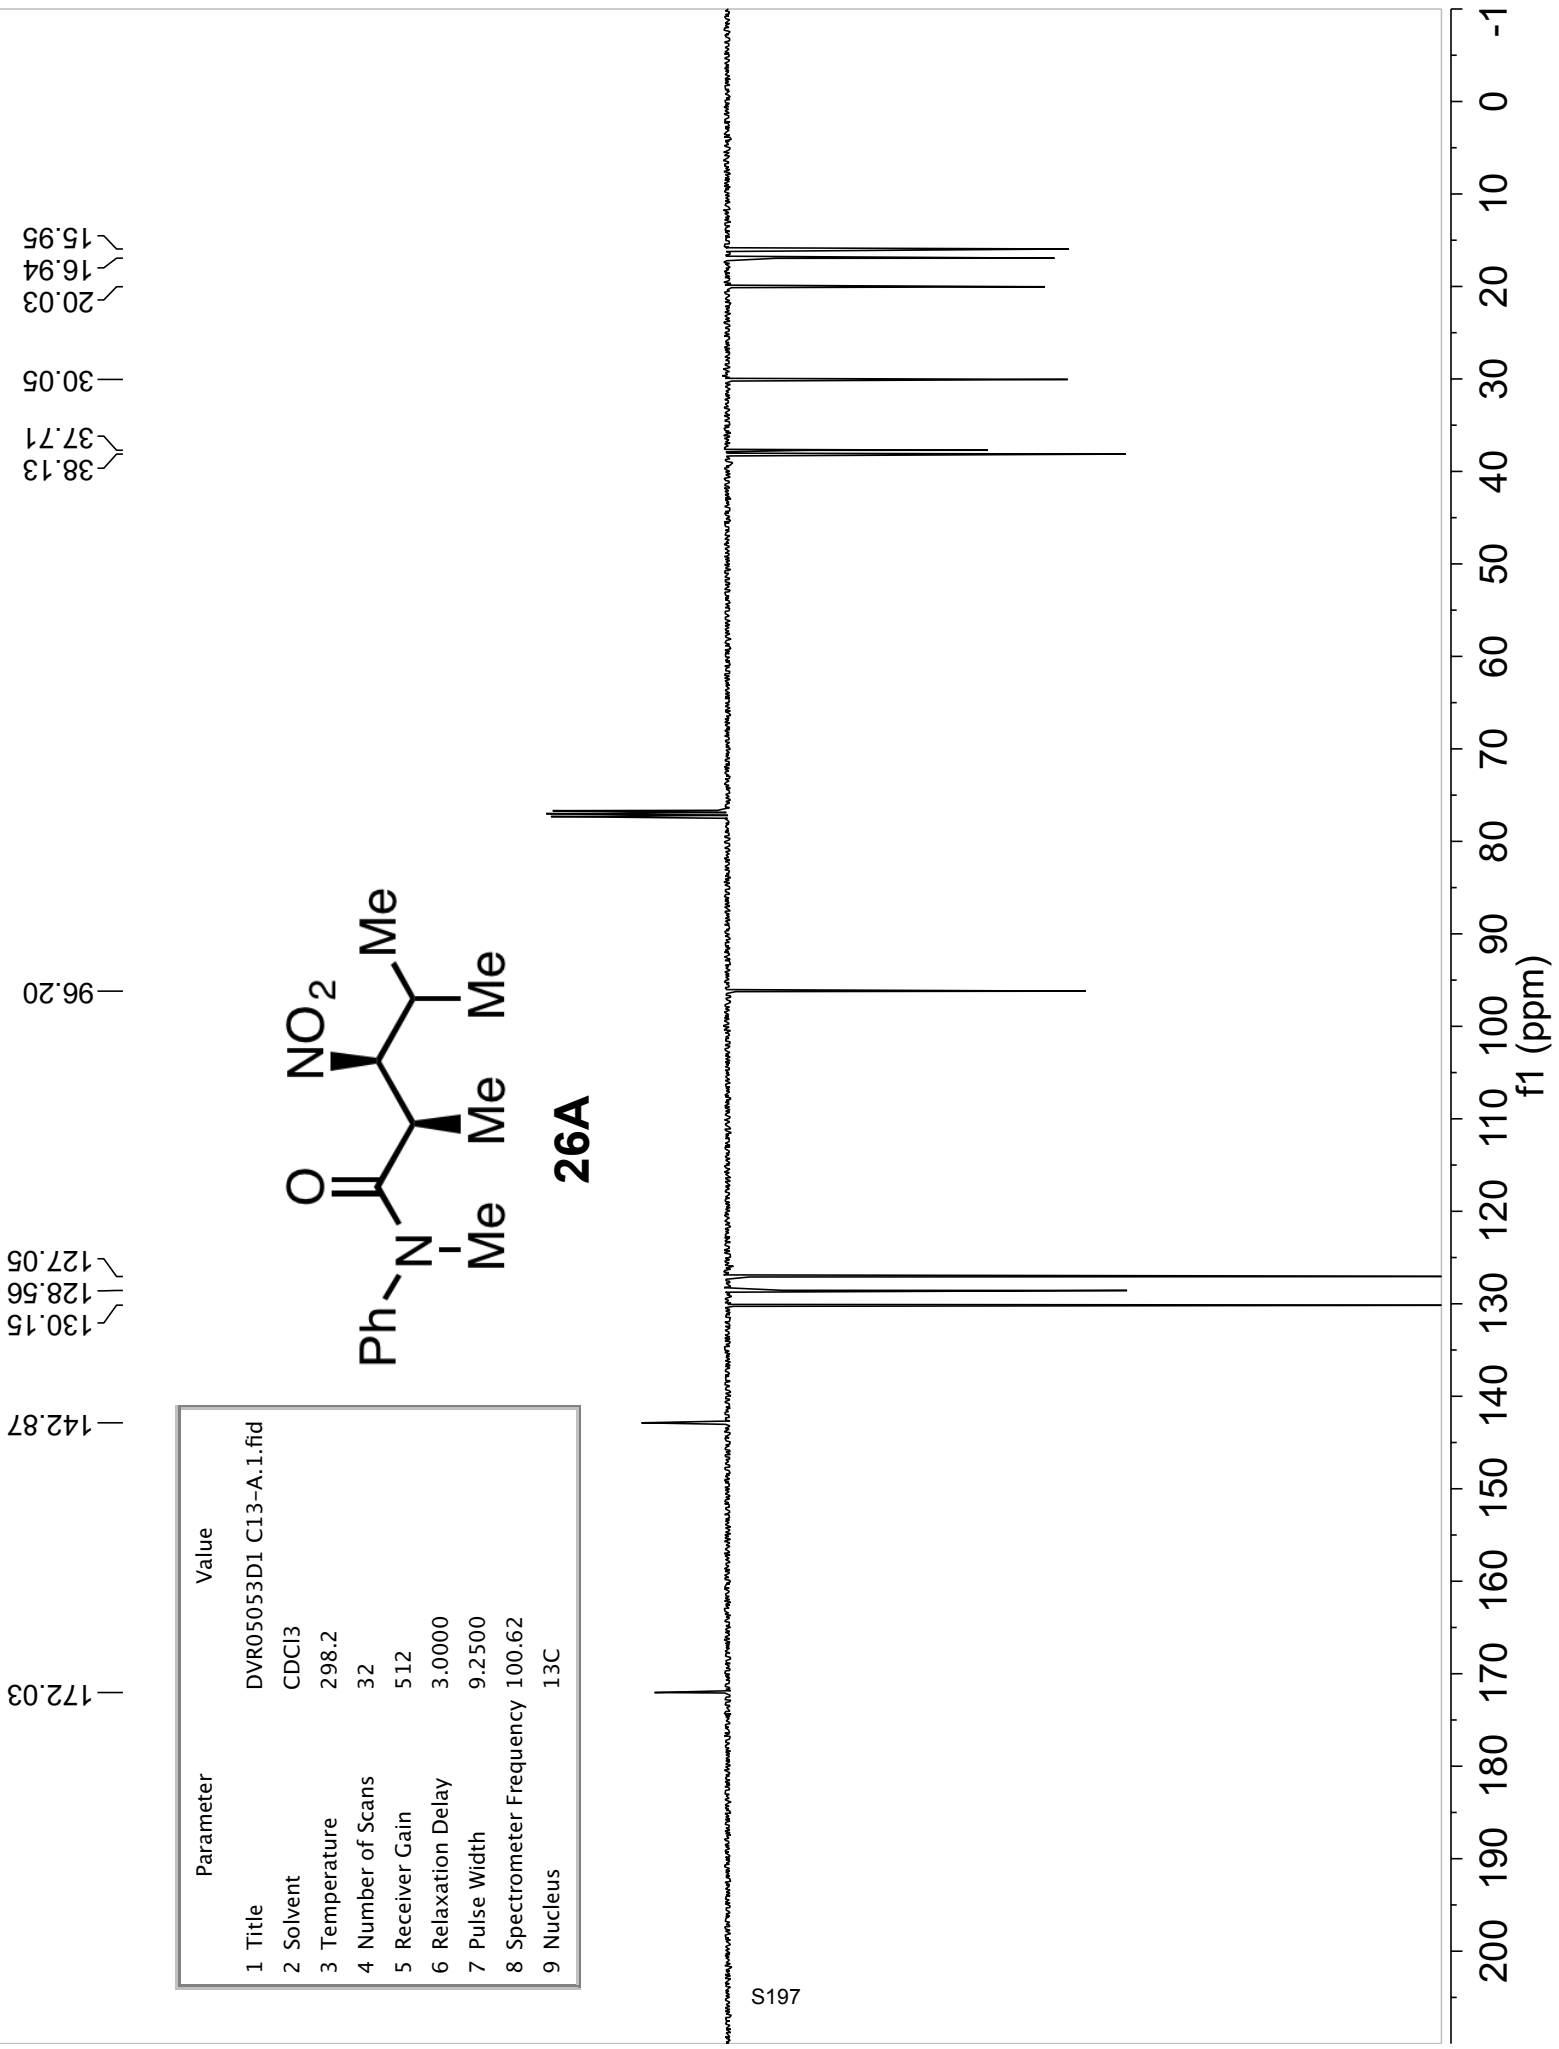

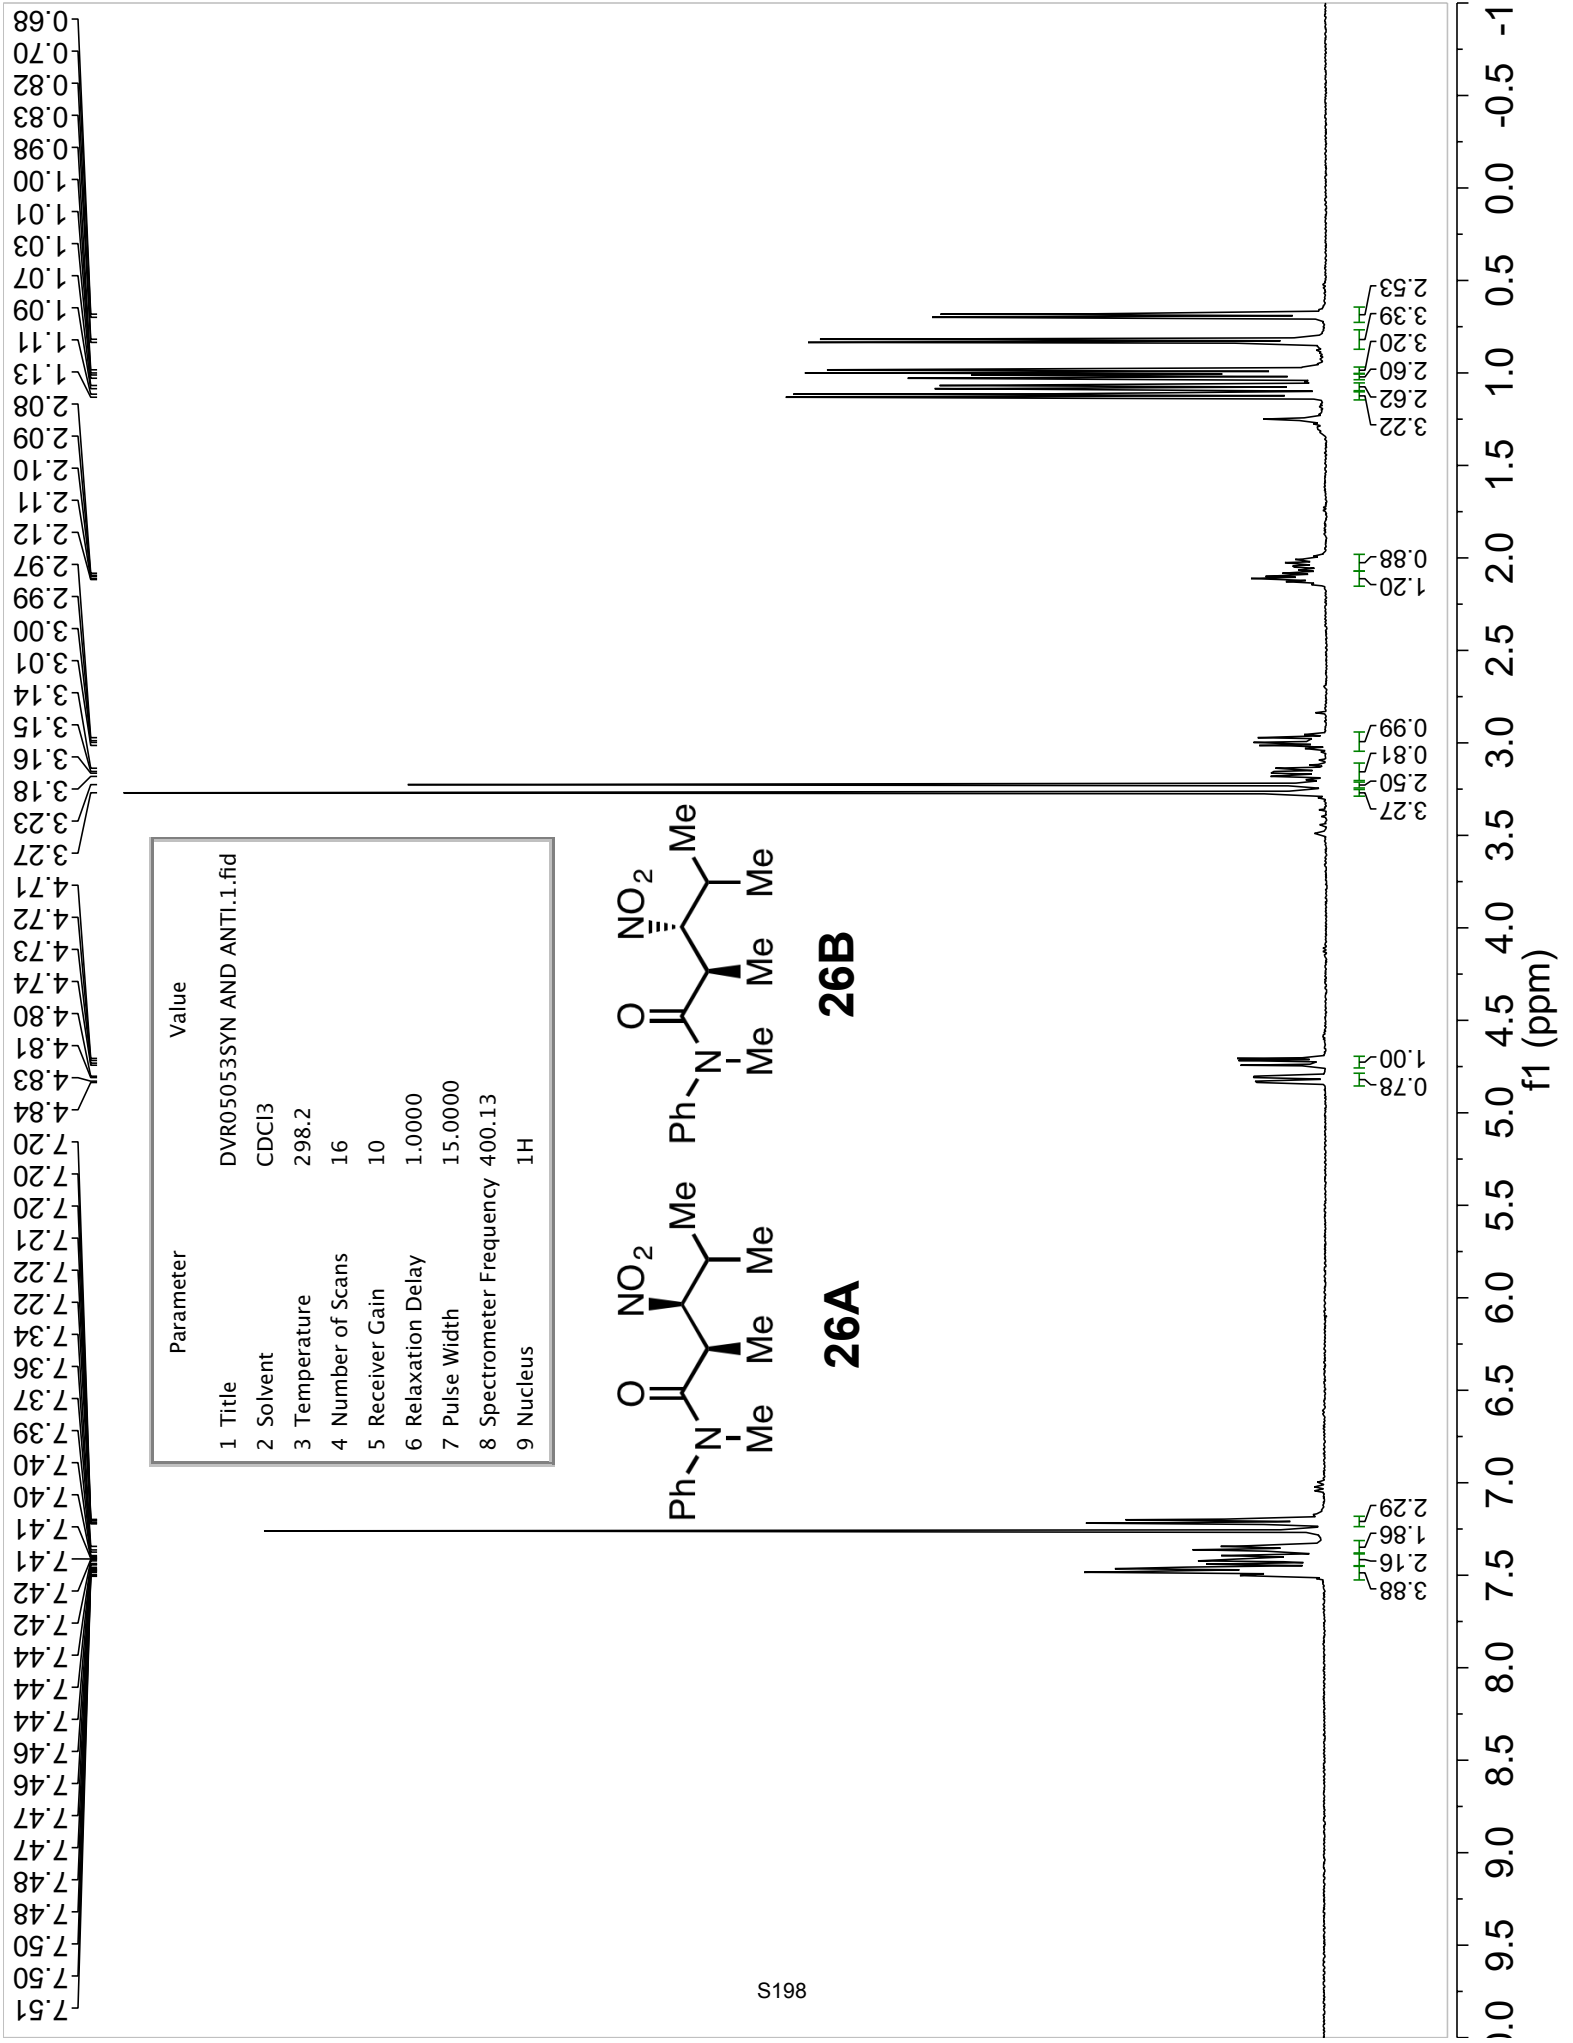

173.05  
172.07  
143.20  
142.88  
130.17  
129.83  
128.58  
128.18  
127.47  
127.07  
96.21  
93.92  
38.15  
37.73  
37.57  
37.52  
30.07  
27.75  
20.50  
20.50  
16.95  
15.97  
15.39  
14.51

| Parameter                | Value                          |
|--------------------------|--------------------------------|
| 1 Title                  | DVR05053SYN AND ANTI C13.1.fid |
| 2 Solvent                | CDCI3                          |
| 3 Temperature            | 298.2                          |
| 4 Number of Scans        | 1024                           |
| 5 Receiver Gain          | 512                            |
| 6 Relaxation Delay       | 3.0000                         |
| 7 Pulse Width            | 9.2500                         |
| 8 Spectrometer Frequency | 100.62                         |
| 9 Nucleus                | <sup>13</sup> C                |

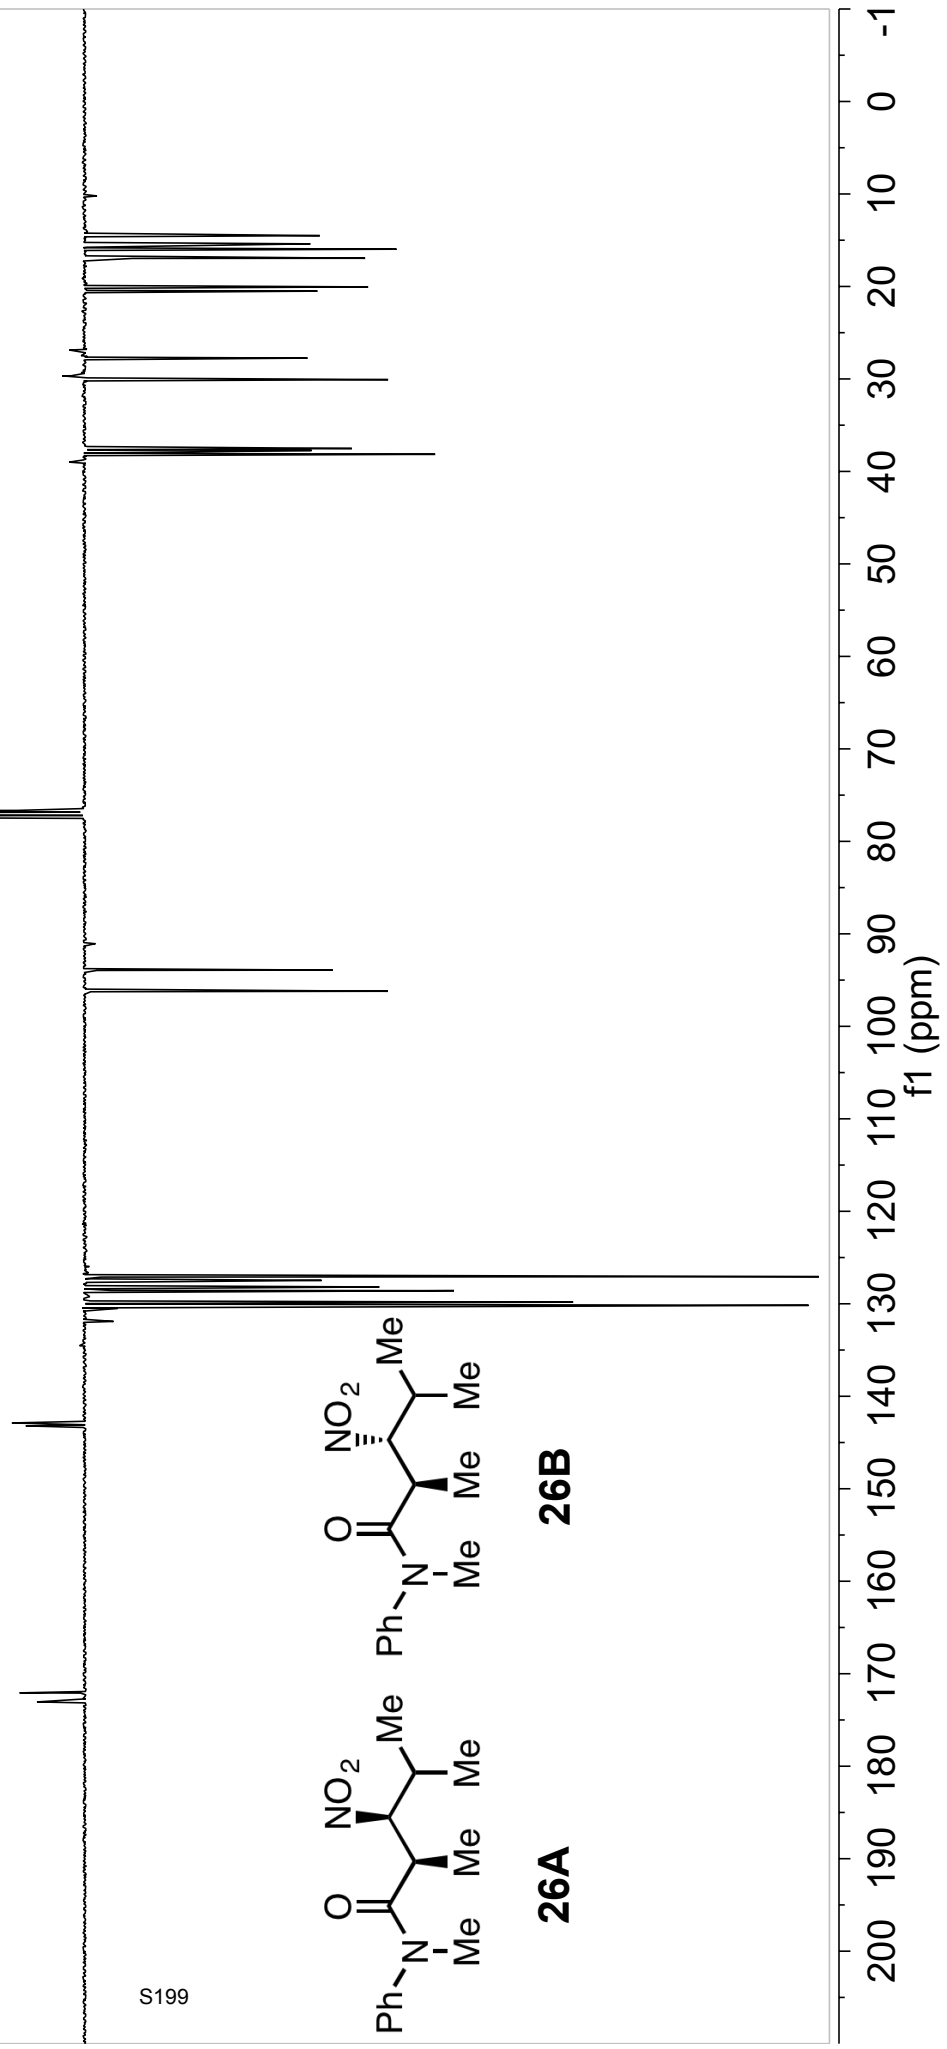

S199

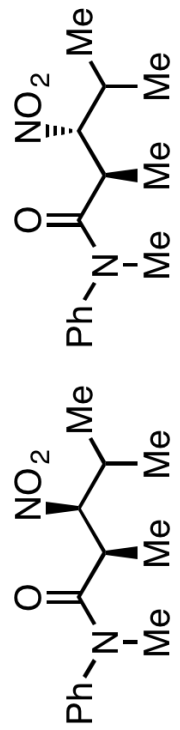

26A

26B

| Parameter                | Value             |
|--------------------------|-------------------|
| 1 Title                  | DVR05096CRD.1.fid |
| 2 Solvent                | CDCI3             |
| 3 Temperature            | 297.0             |
| 4 Number of Scans        | 16                |
| 5 Receiver Gain          | 101               |
| 6 Relaxation Delay       | 1.0000            |
| 7 Pulse Width            | 10.7300           |
| 8 Spectrometer Frequency | 600.32            |
| 9 Nucleus                | <sup>1</sup> H    |

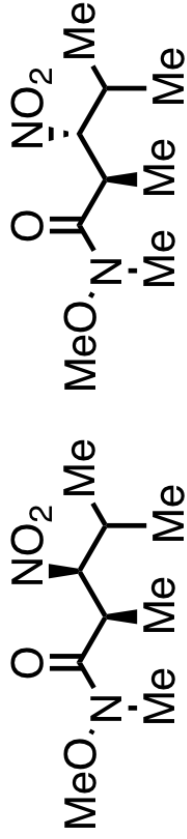

**Crude**

**27A**

**93:07**

**27B**

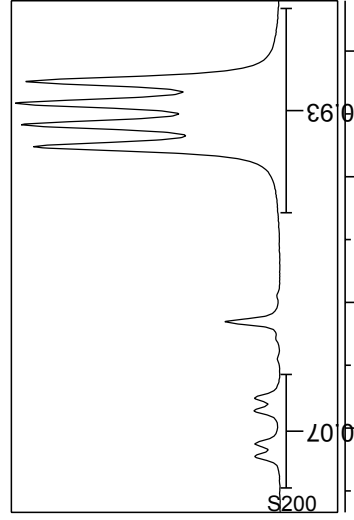

4.85 4.80 4.75 4.70

0.93  
0.07  
H

1.0 9.5 9.0 8.5 8.0 7.5 7.0 6.5 6.0 5.5 5.0 4.5 4.0 3.5 3.0 2.5 2.0 1.5 1.0 0.5 0.0 -0.5 -1

4.82  
4.81  
4.80  
4.79  
4.70  
4.69  
4.67  
4.66  
3.75  
3.61  
3.60  
3.59  
3.58  
3.57  
3.56  
3.56  
3.54  
3.18  
3.15  
2.19  
2.18  
2.17  
2.16  
2.16  
2.14  
2.14  
2.13  
2.12  
2.11  
1.18  
1.16  
1.13  
1.12  
1.00  
0.99  
0.98  
0.97  
0.96  
0.94

| Parameter                | Value            |
|--------------------------|------------------|
| 1 Title                  | DVR05096D1.1.fid |
| 2 Solvent                | CDCl3            |
| 3 Temperature            | 298.2            |
| 4 Number of Scans        | 16               |
| 5 Receiver Gain          | 8                |
| 6 Relaxation Delay       | 1.0000           |
| 7 Pulse Width            | 15.0000          |
| 8 Spectrometer Frequency | 400.13           |
| 9 Nucleus                | 1H               |

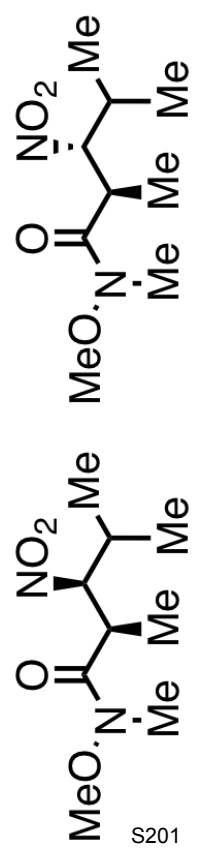

0.04  
1.00  
3.23  
1.03  
3.17  
1.07  
3.18  
0.21  
6.20

9.5 9.0 8.5 8.0 7.5 7.0 6.5 6.0 5.5 5.0 4.5 4.0 3.5 3.0 2.5 2.0 1.5 1.0 0.5 0.0 -0.5 -1

173.43

Parameter Value

|                          |                  |
|--------------------------|------------------|
| 1 Title                  | DVR05096D1.2.fid |
| 2 Solvent                | CDCI3            |
| 3 Temperature            | 298.2            |
| 4 Number of Scans        | 1024             |
| 5 Receiver Gain          | 512              |
| 6 Relaxation Delay       | 3.0000           |
| 7 Pulse Width            | 9.2500           |
| 8 Spectrometer Frequency | 100.62           |
| 9 Nucleus                | <sup>13</sup> C  |

36.86  
32.37  
30.23  
27.82  
20.57  
19.68  
16.96  
15.45  
13.81

61.77  
61.35

95.66  
93.09

S202

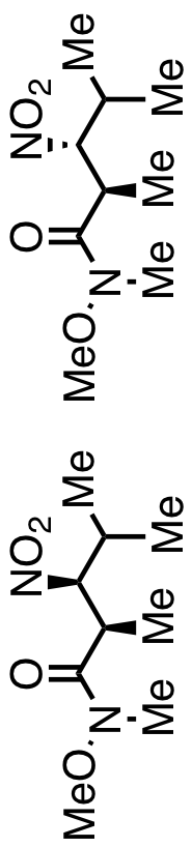

27A

27B

200 190 180 170 160 150 140 130 120 110 100 90 80 70 60 50 40 30 20 10 0 -1



| Parameter                | Value               |
|--------------------------|---------------------|
| 1 Title                  | DVR05054crd 1.1.fid |
| 2 Solvent                | CDCl3               |
| 3 Temperature            | 297.8               |
| 4 Number of Scans        | 16                  |
| 5 Receiver Gain          | 203                 |
| 6 Relaxation Delay       | 1.0000              |
| 7 Pulse Width            | 15.0000             |
| 8 Spectrometer Frequency | 400.15              |
| 9 Nucleus                | <sup>1</sup> H      |

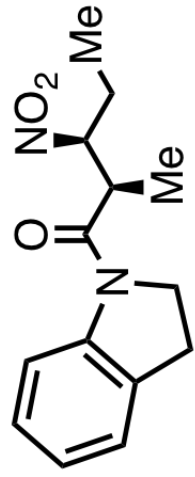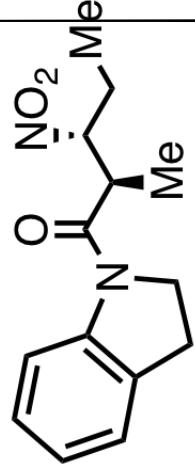

**Crude**

**28A**

**88:12**

**28B**

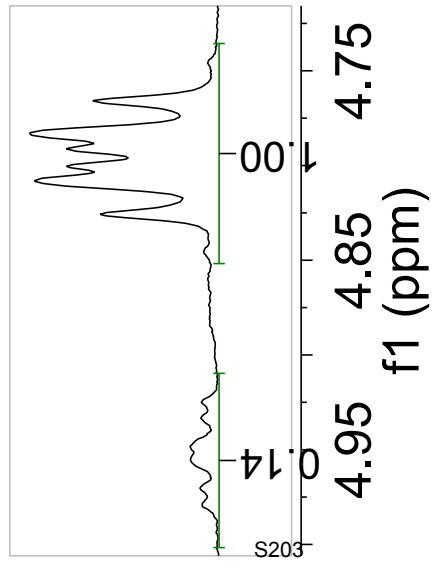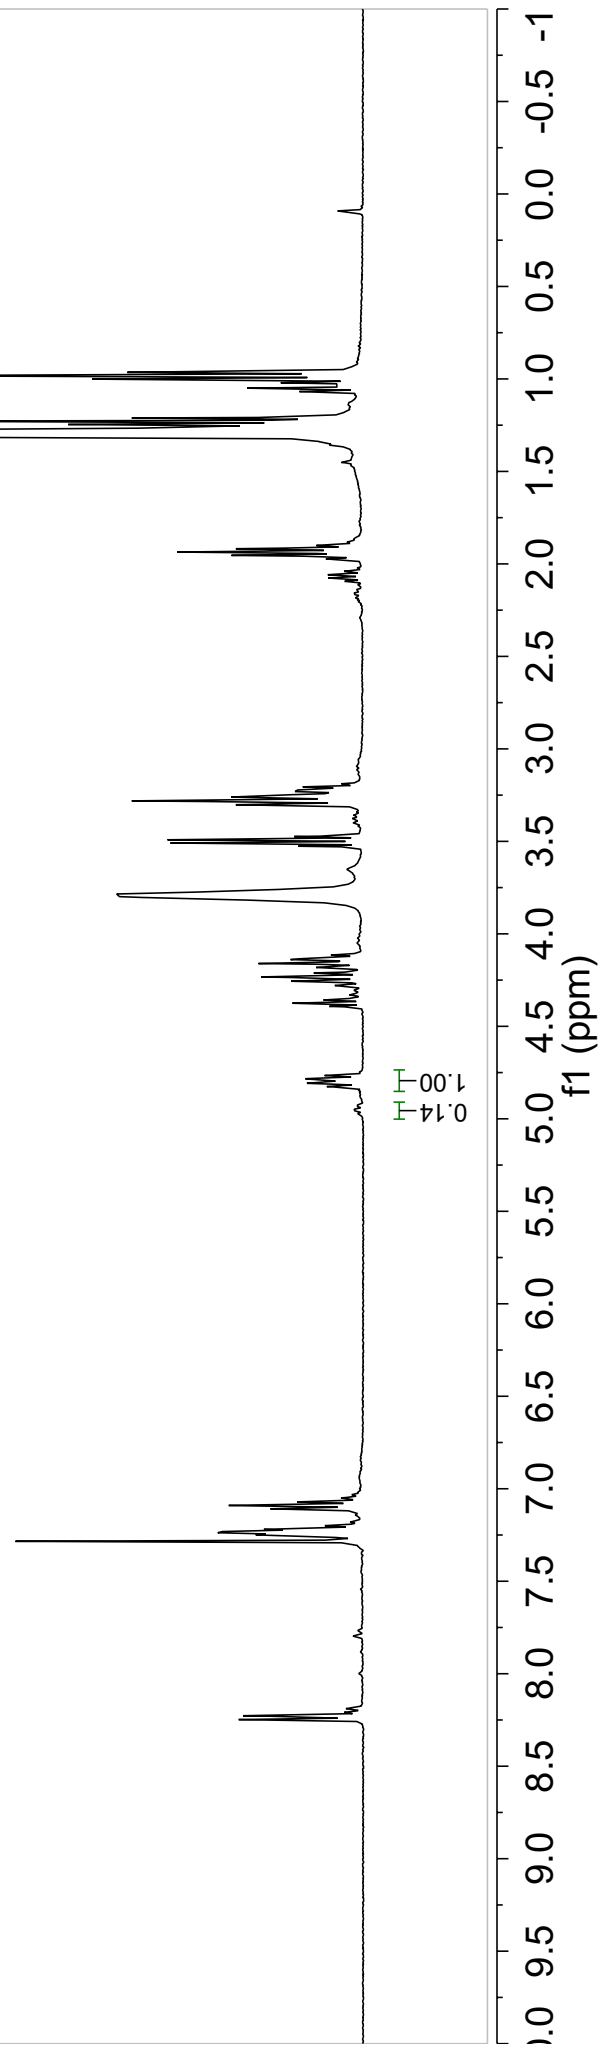

| Parameter                | Value            |
|--------------------------|------------------|
| 1 Title                  | DVR05054D1.1.fid |
| 2 Solvent                | DMSO             |
| 3 Temperature            | 298.2            |
| 4 Number of Scans        | 16               |
| 5 Receiver Gain          | 8                |
| 6 Relaxation Delay       | 1.0000           |
| 7 Pulse Width            | 15.0000          |
| 8 Spectrometer Frequency | 400.13           |
| 9 Nucleus                | <sup>1</sup> H   |

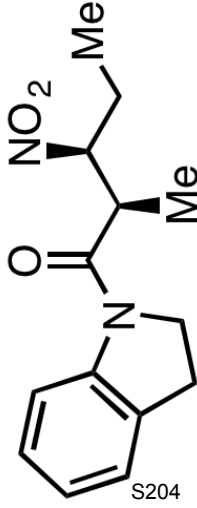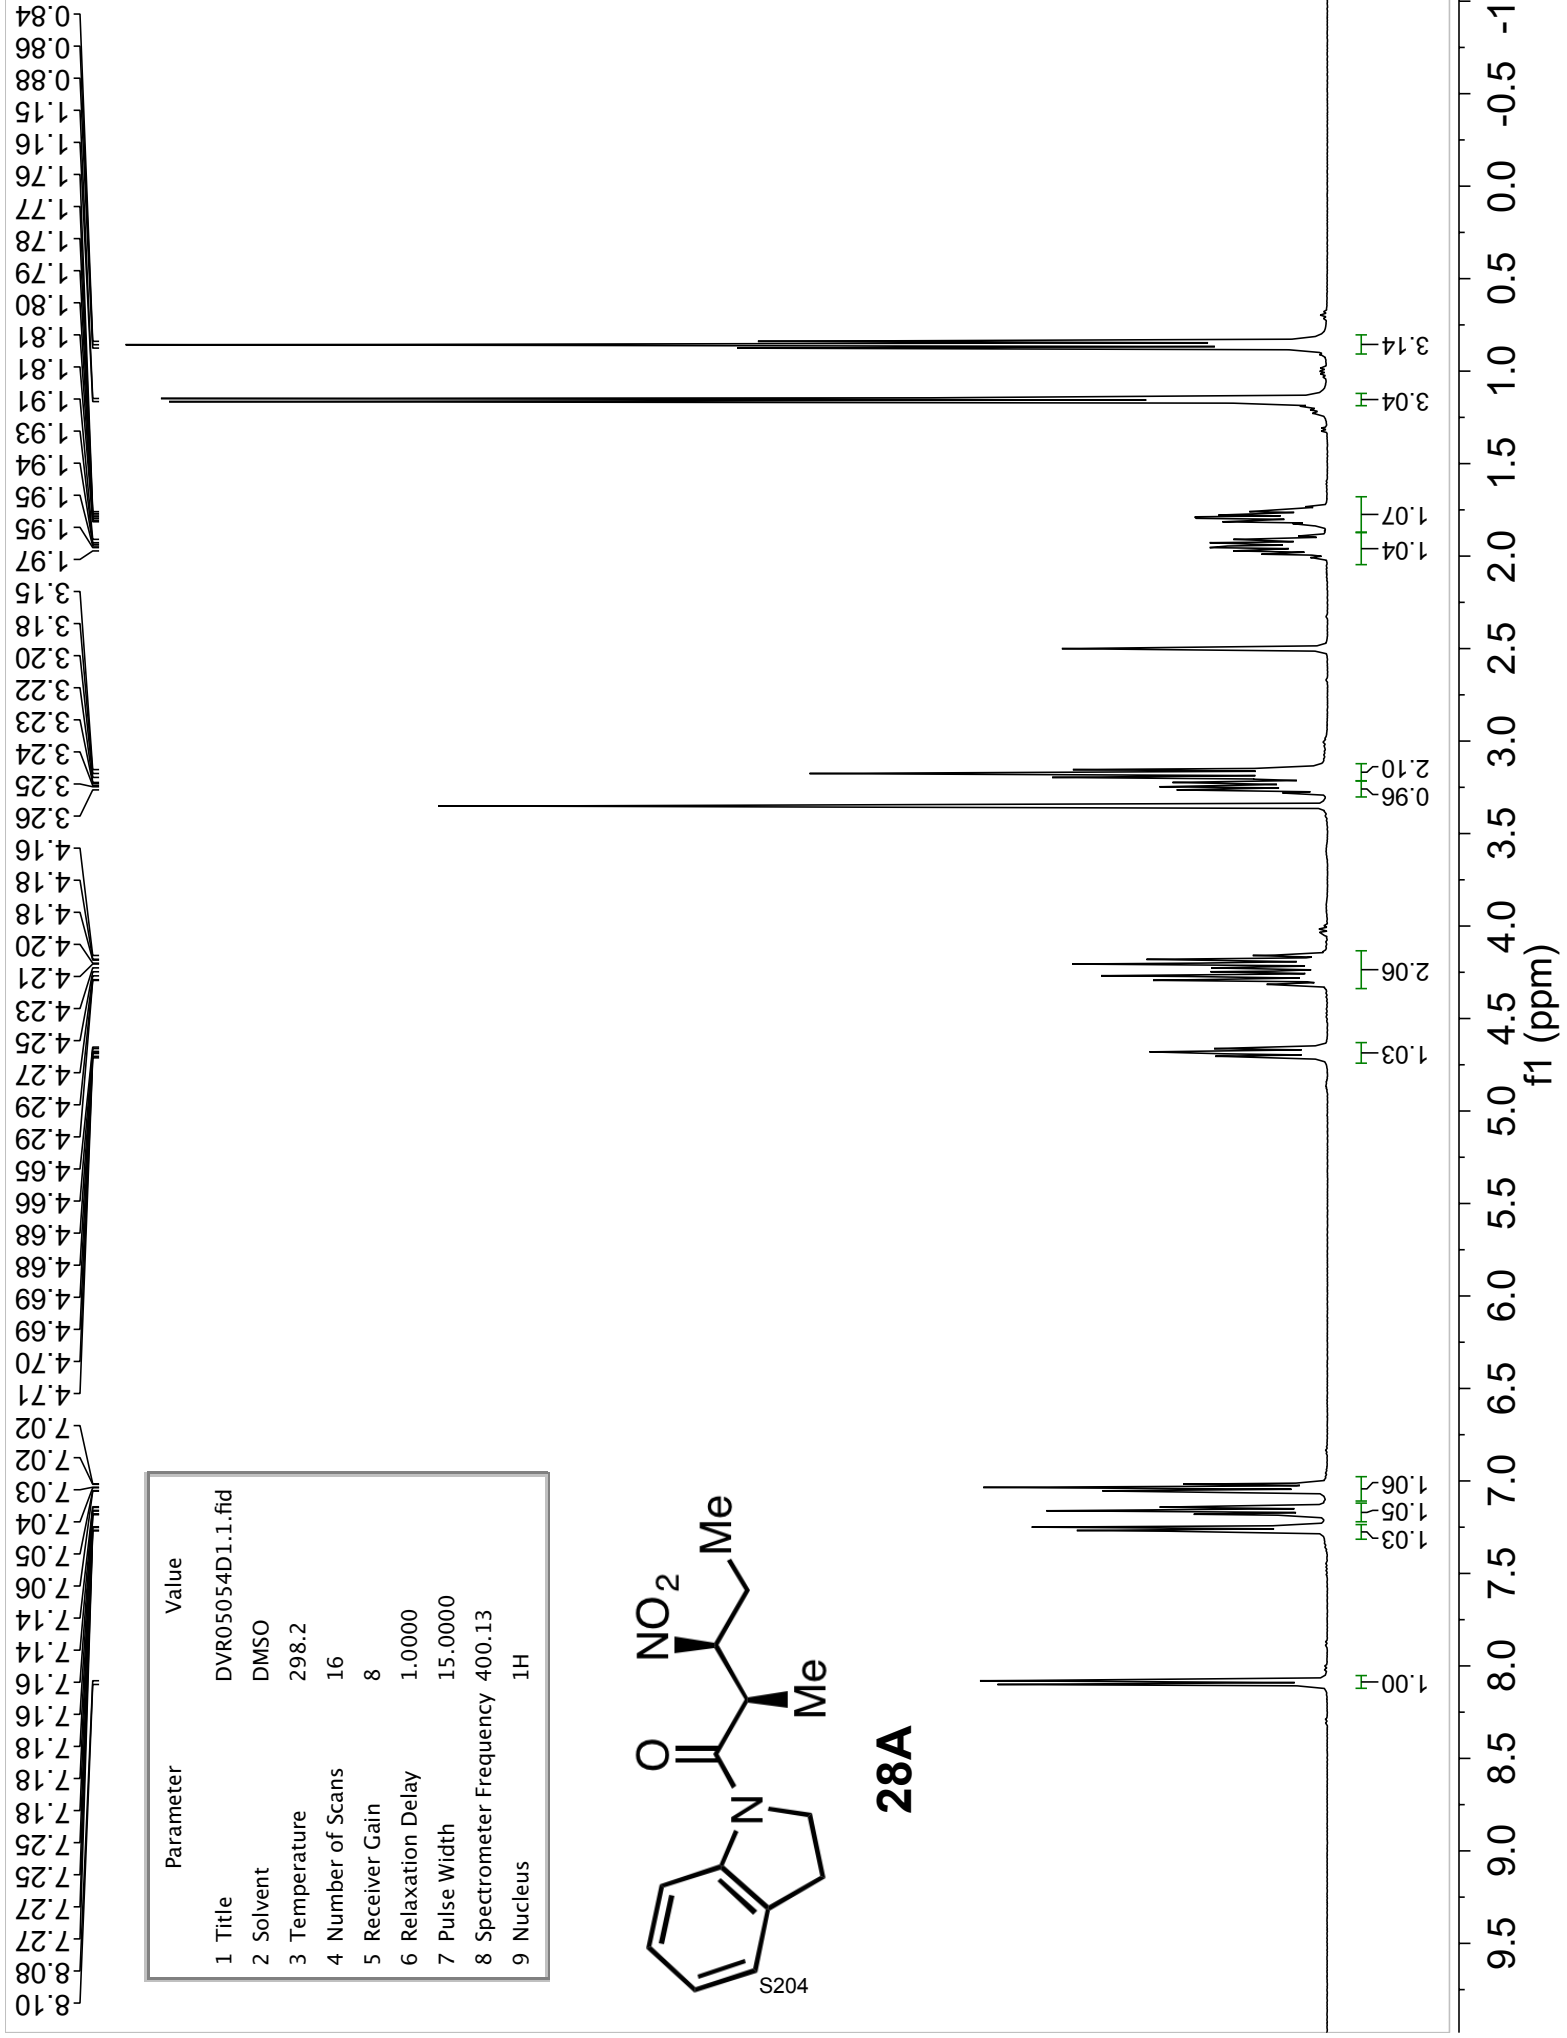

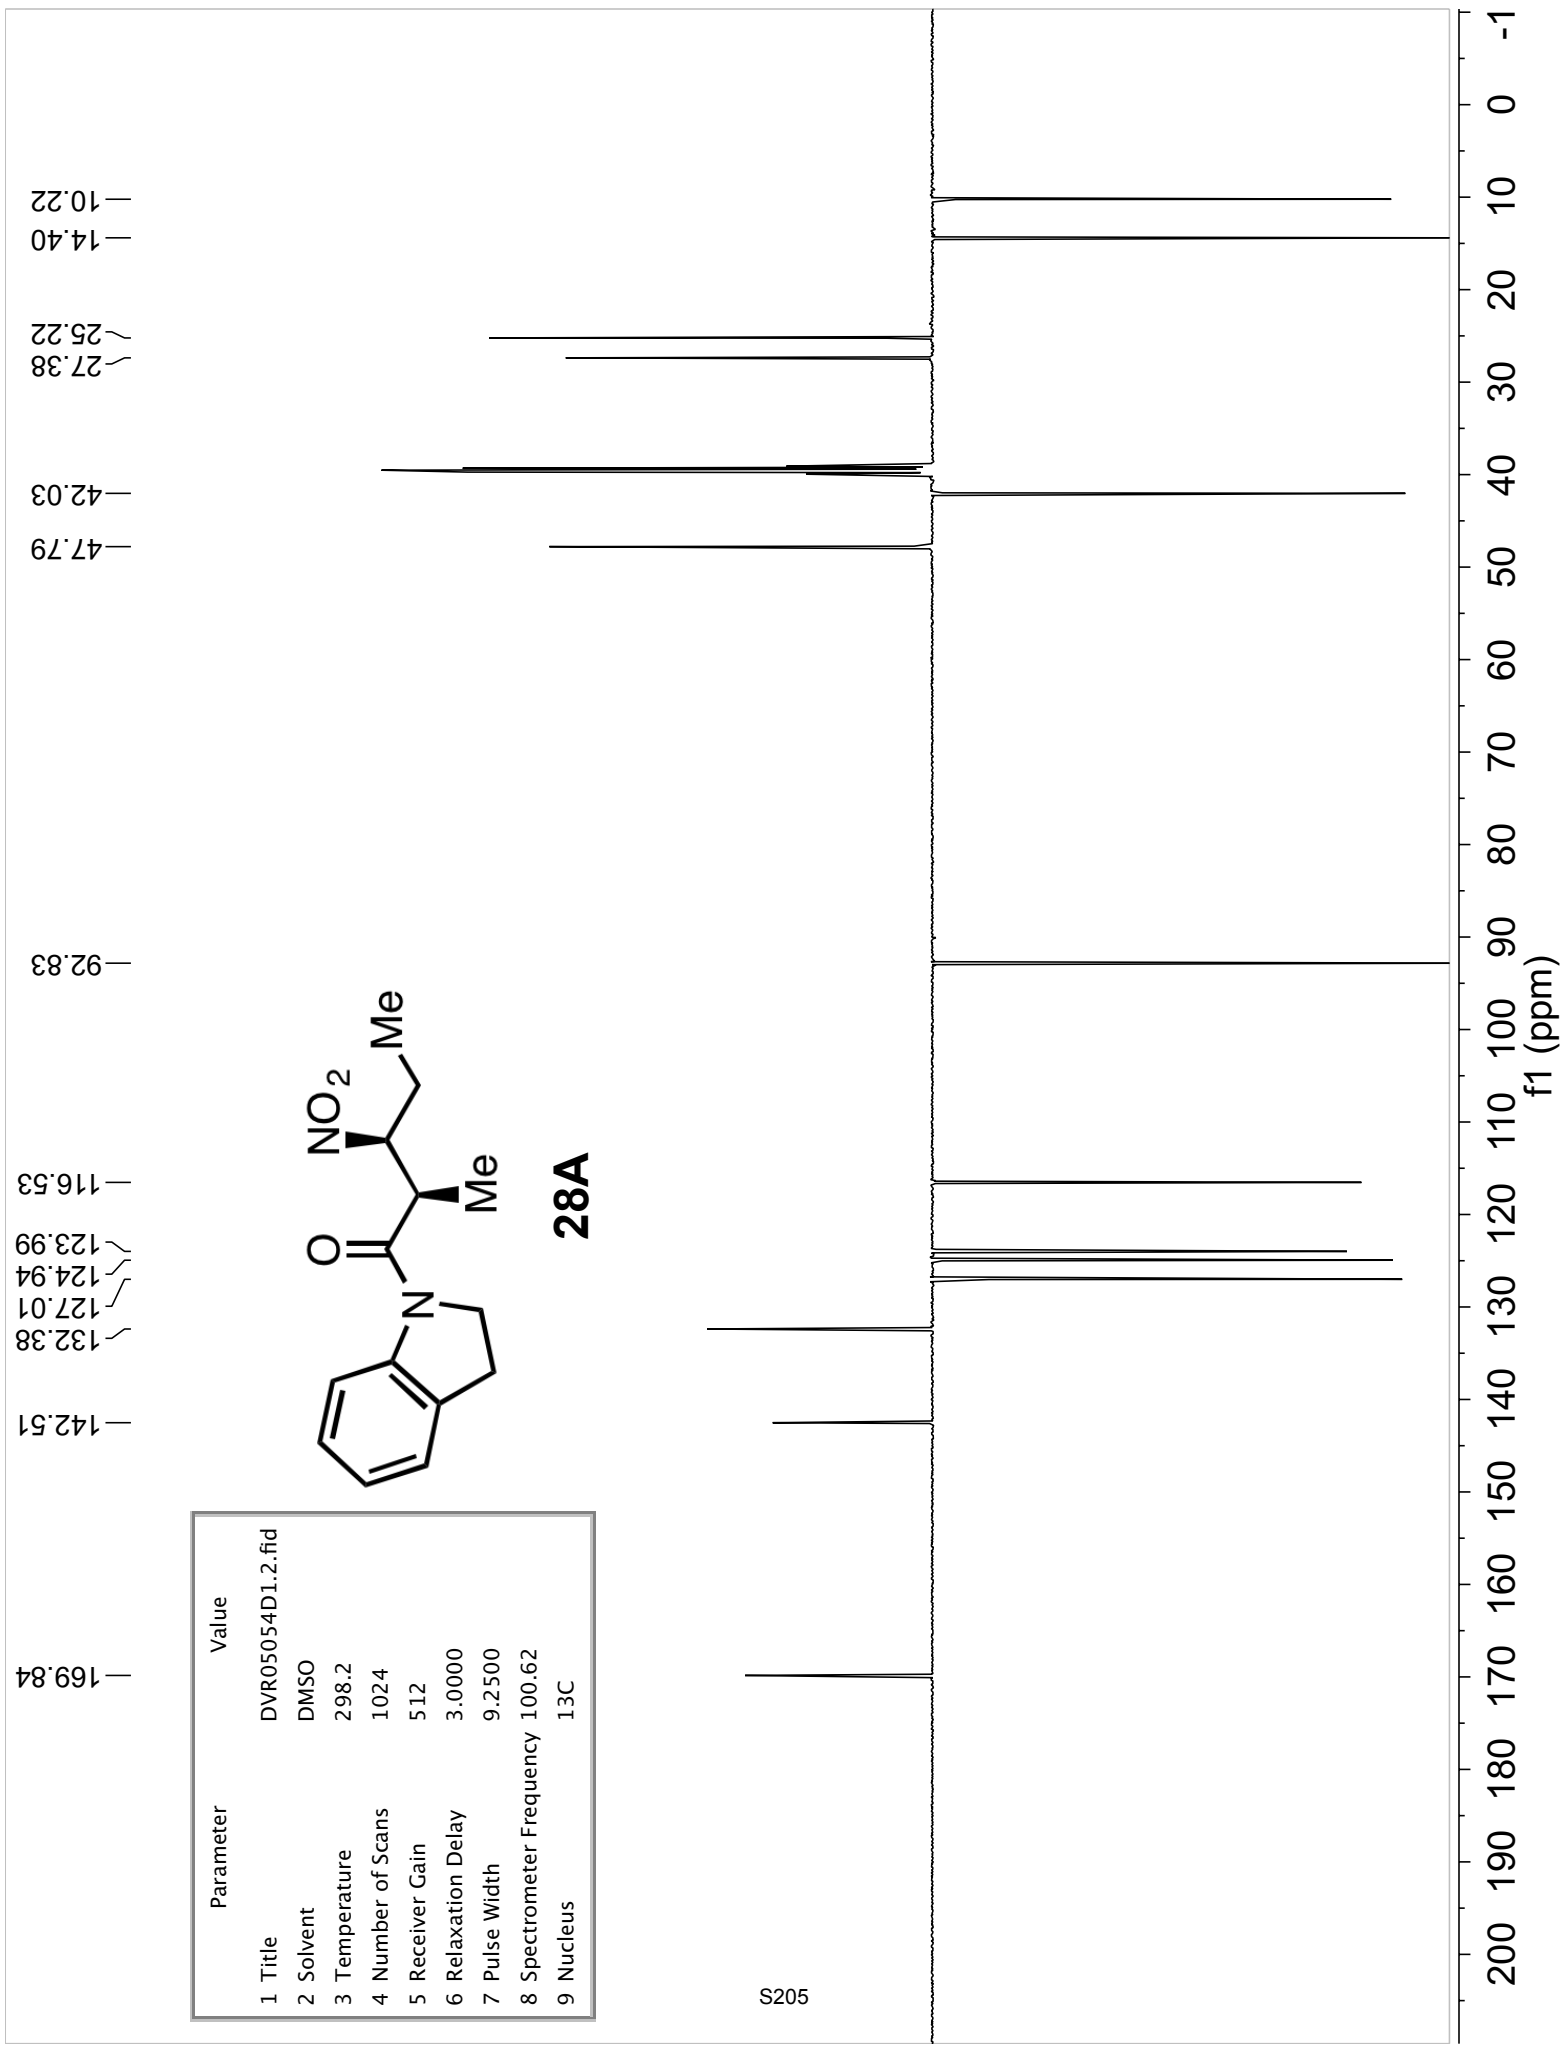

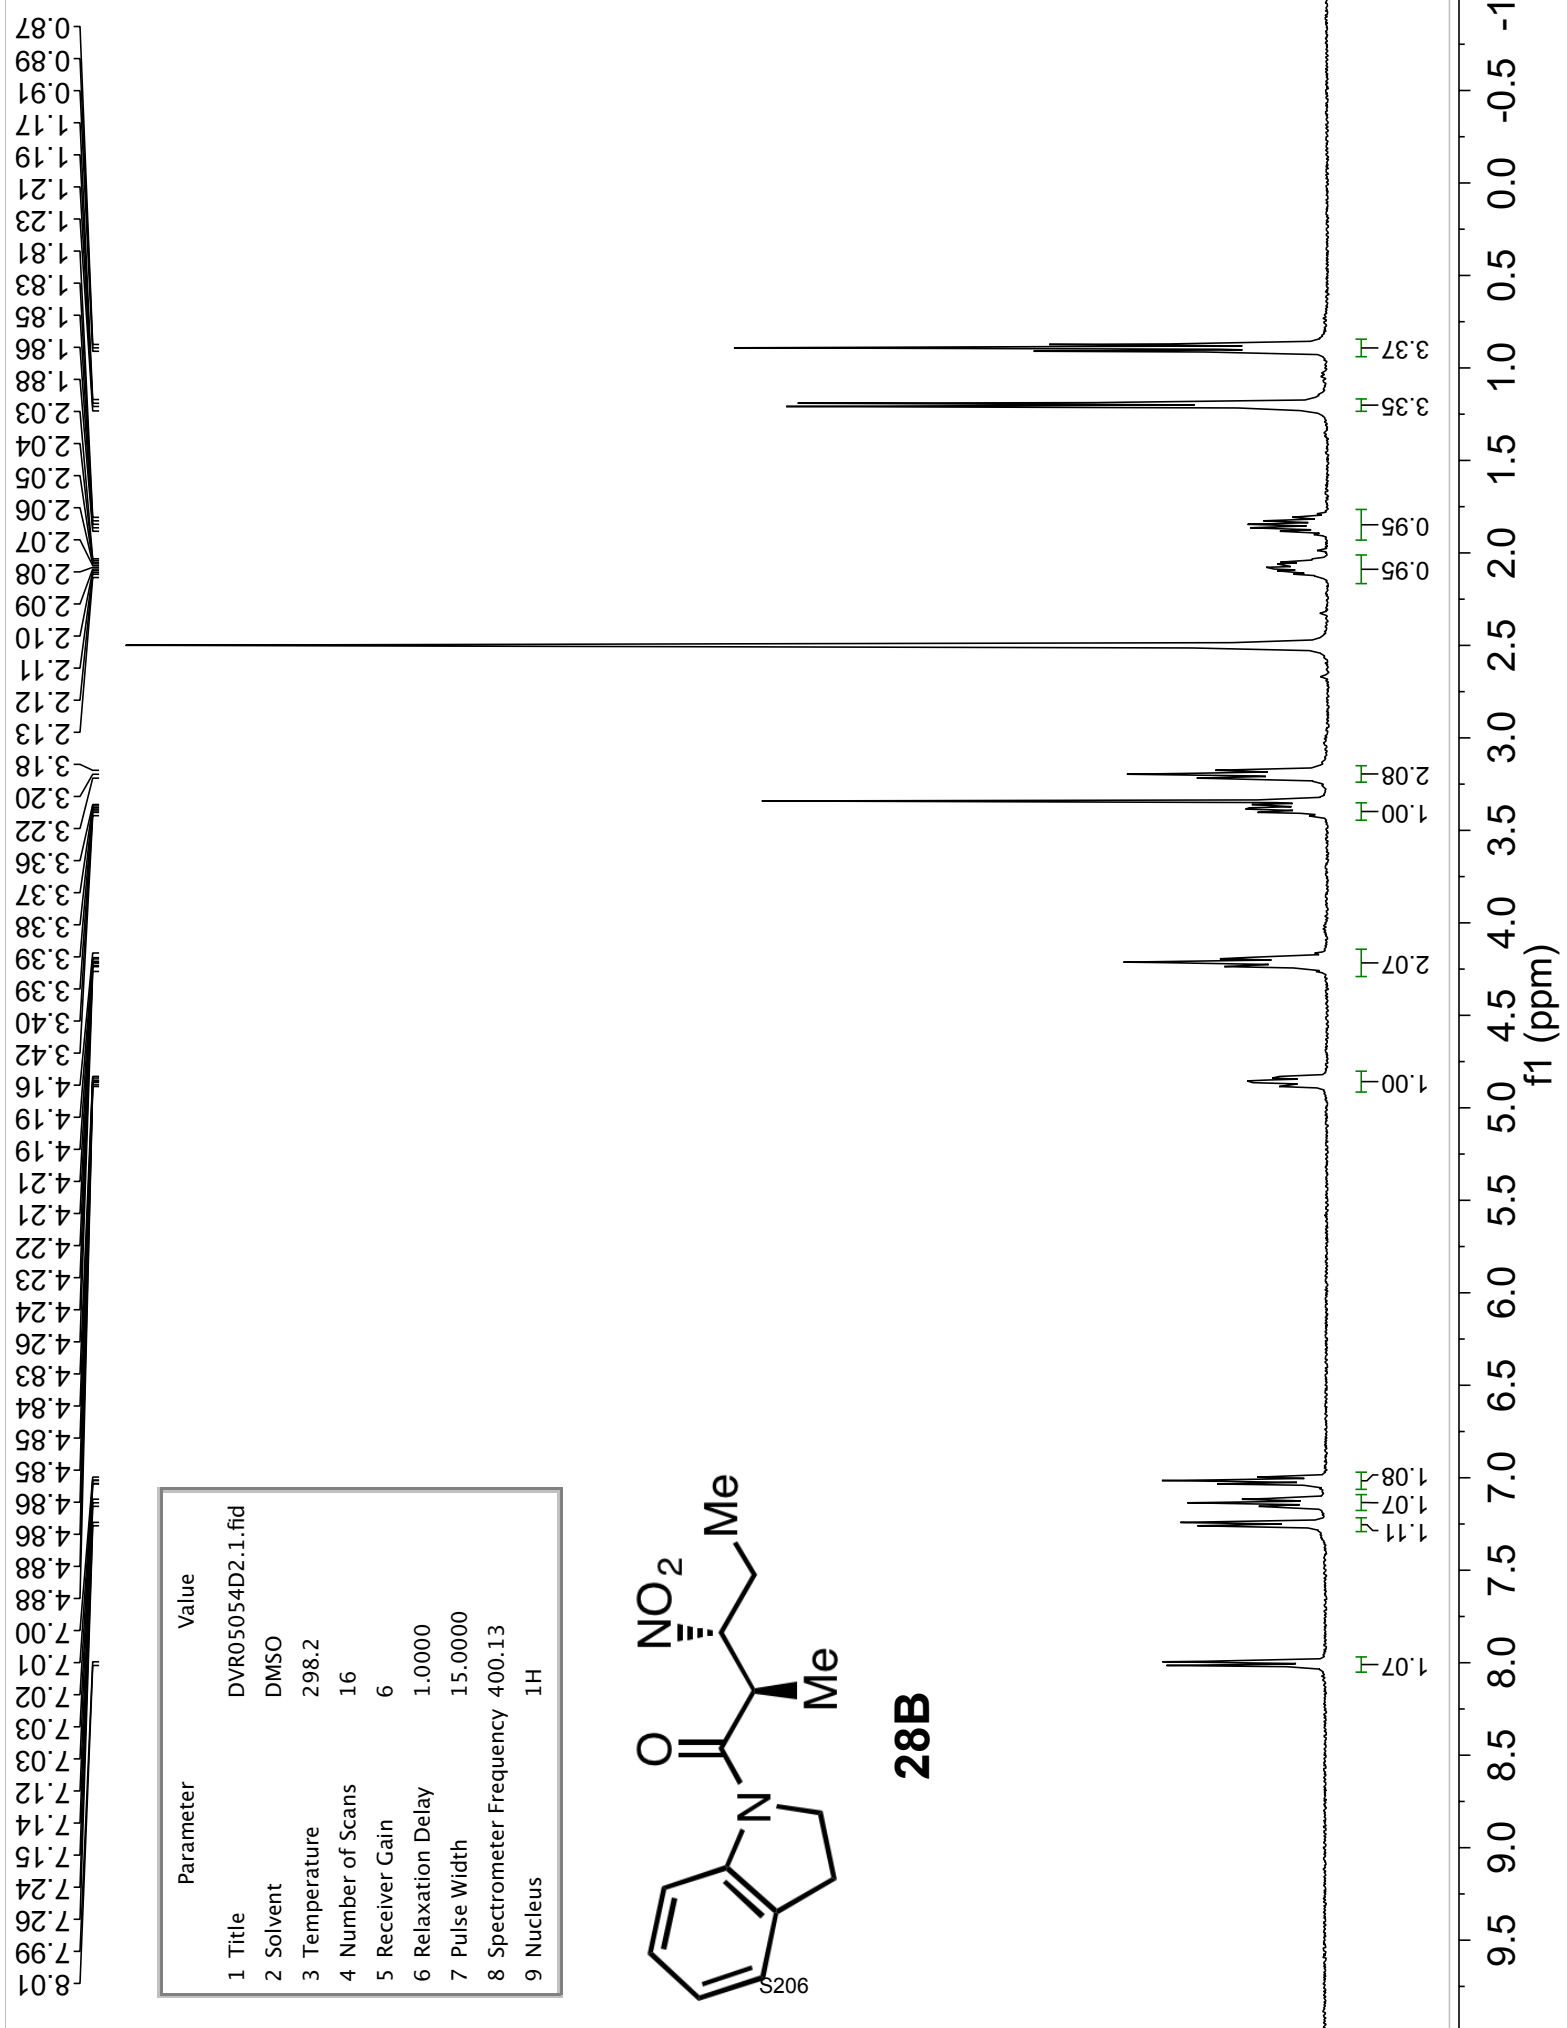

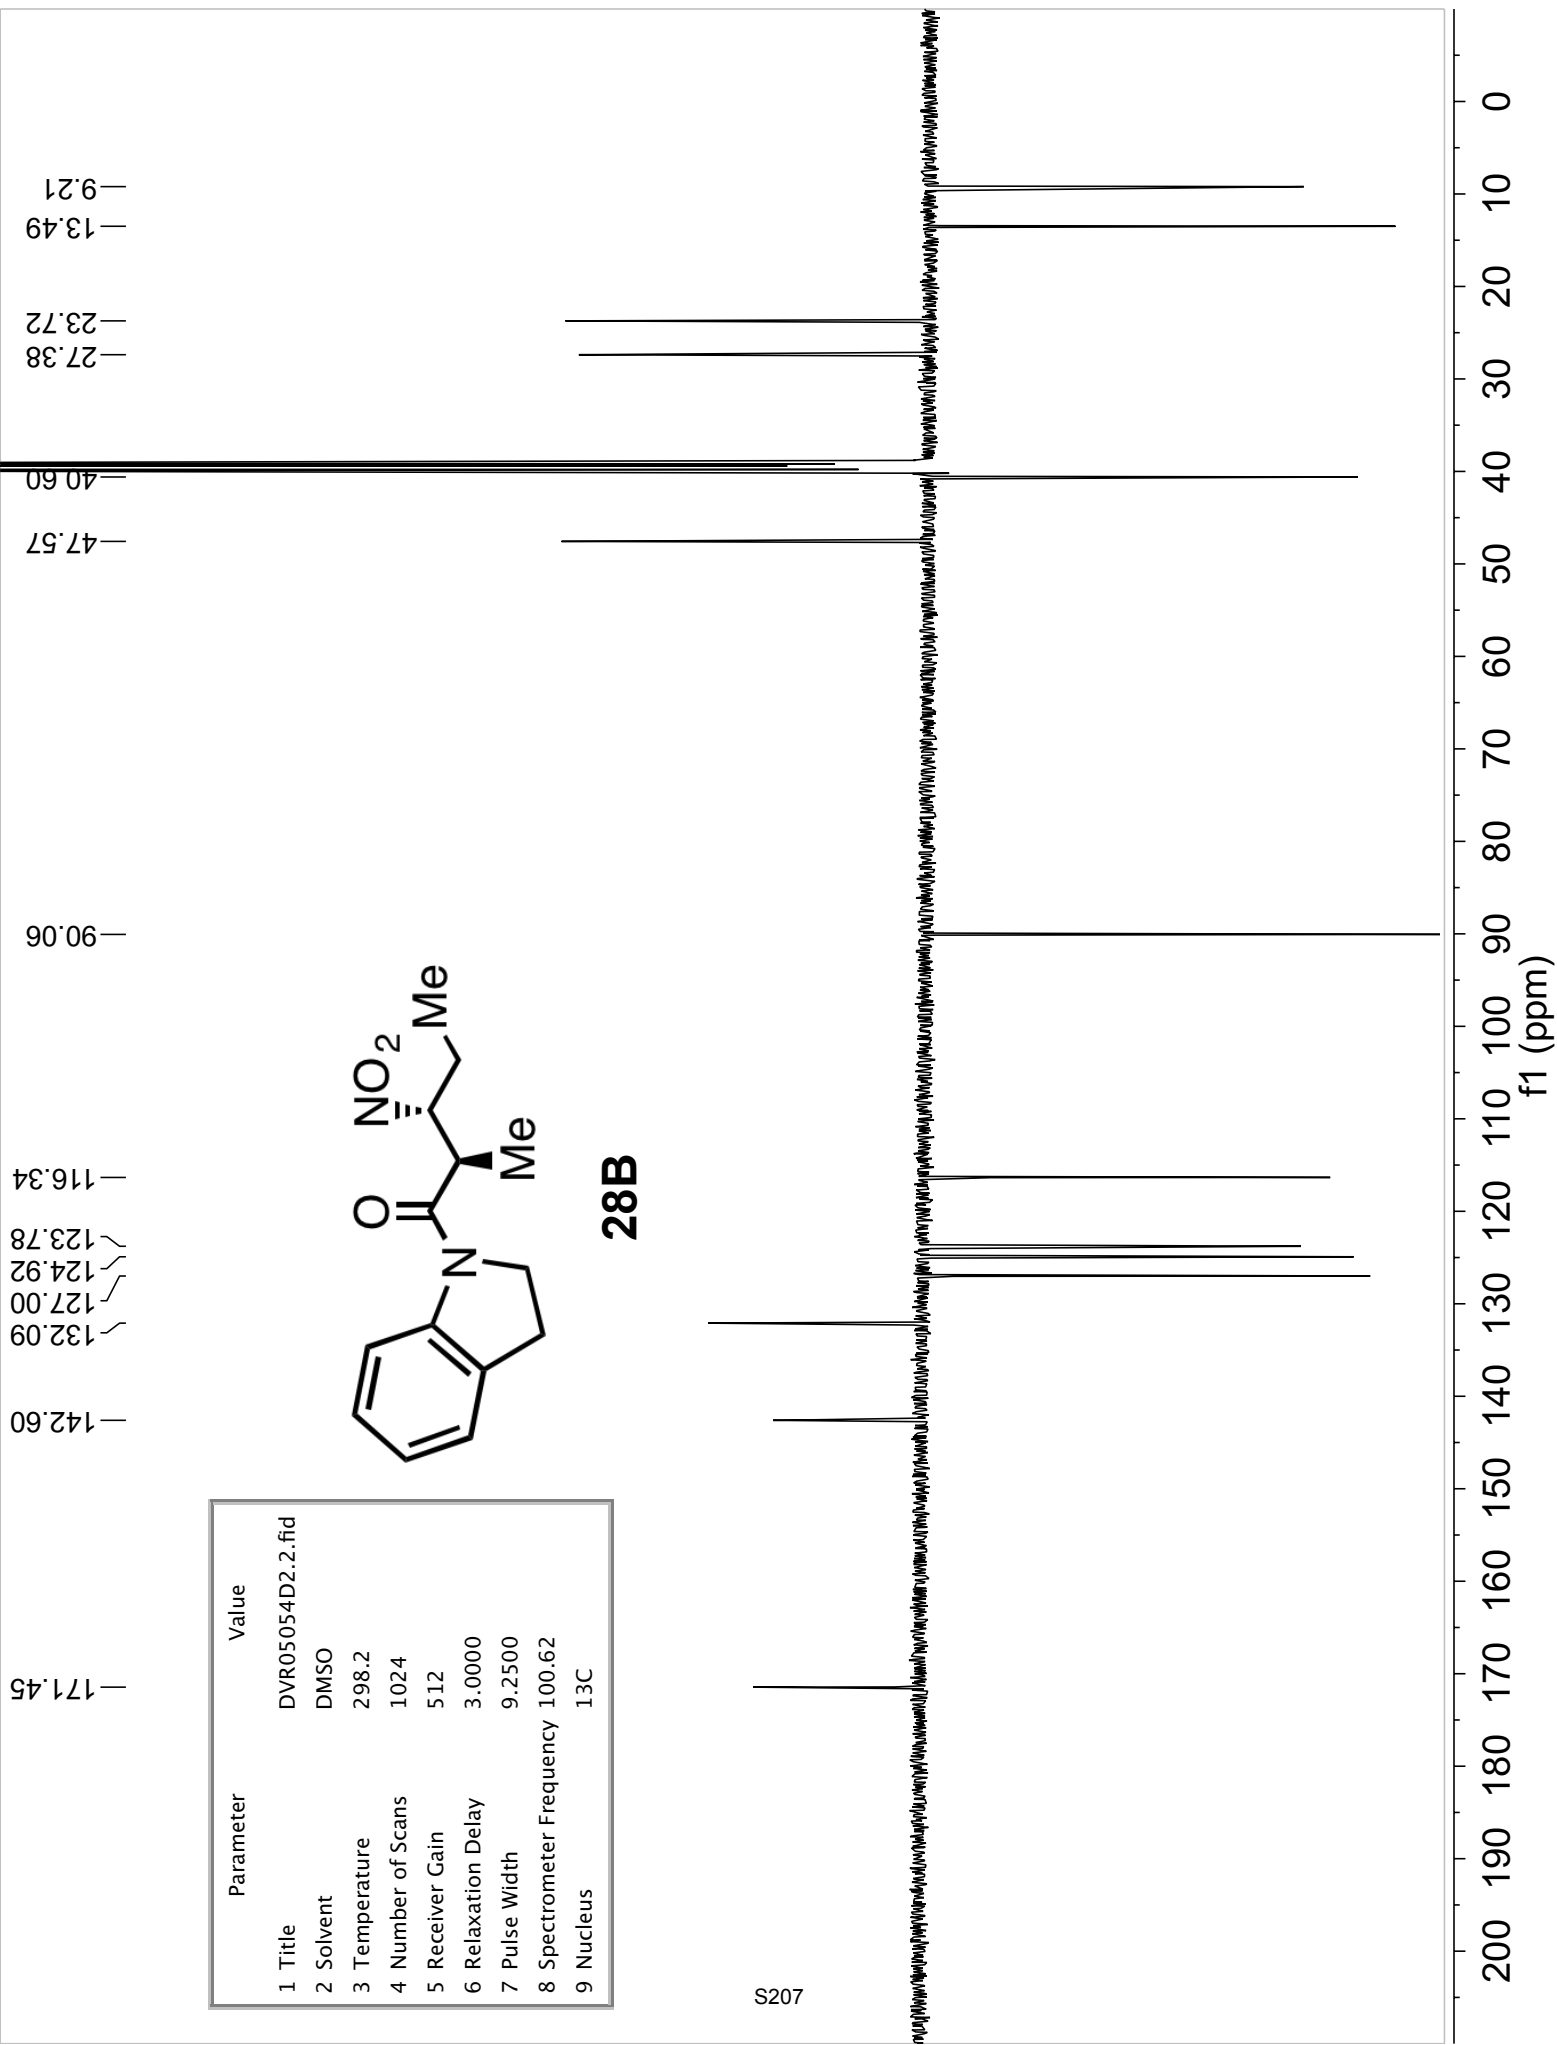

| Parameter                | Value             |
|--------------------------|-------------------|
| 1 Title                  | DVR05064CRD.1.fid |
| 2 Solvent                | CDCI3             |
| 3 Temperature            | 300.0             |
| 4 Number of Scans        | 16                |
| 5 Receiver Gain          | 161               |
| 6 Relaxation Delay       | 1.0000            |
| 7 Pulse Width            | 13.1400           |
| 8 Spectrometer Frequency | 600.32            |
| 9 Nucleus                | <sup>1</sup> H    |

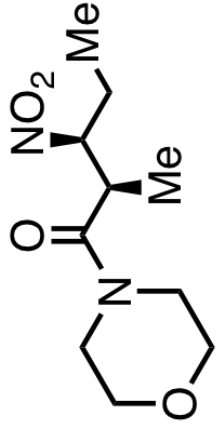

**29A**

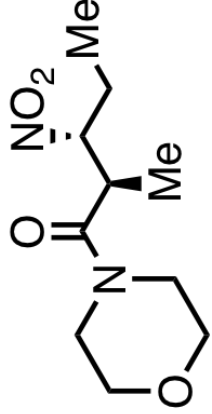

**Crude**

**81:19**

**29B**

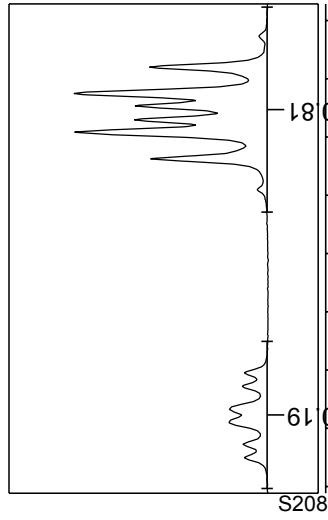

4.90 4.85 4.80 4.75 4.70

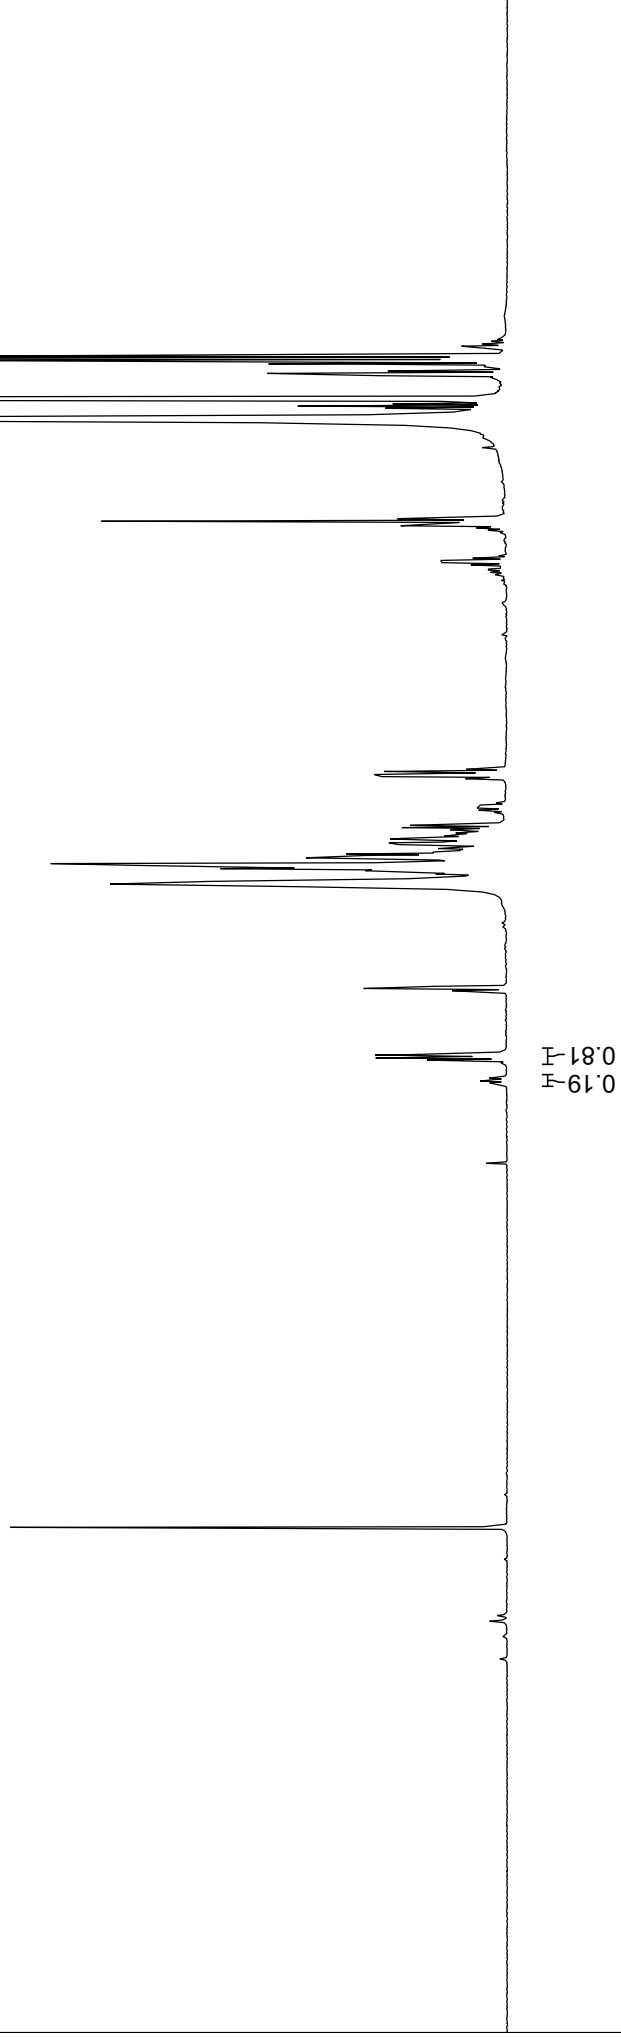

0.19  
0.81

10.0 9.5 9.0 8.5 8.0 7.5 7.0 6.5 6.0 5.5 5.0 4.5 4.0 3.5 3.0 2.5 2.0 1.5 1.0 0.5 0.0 -0.5

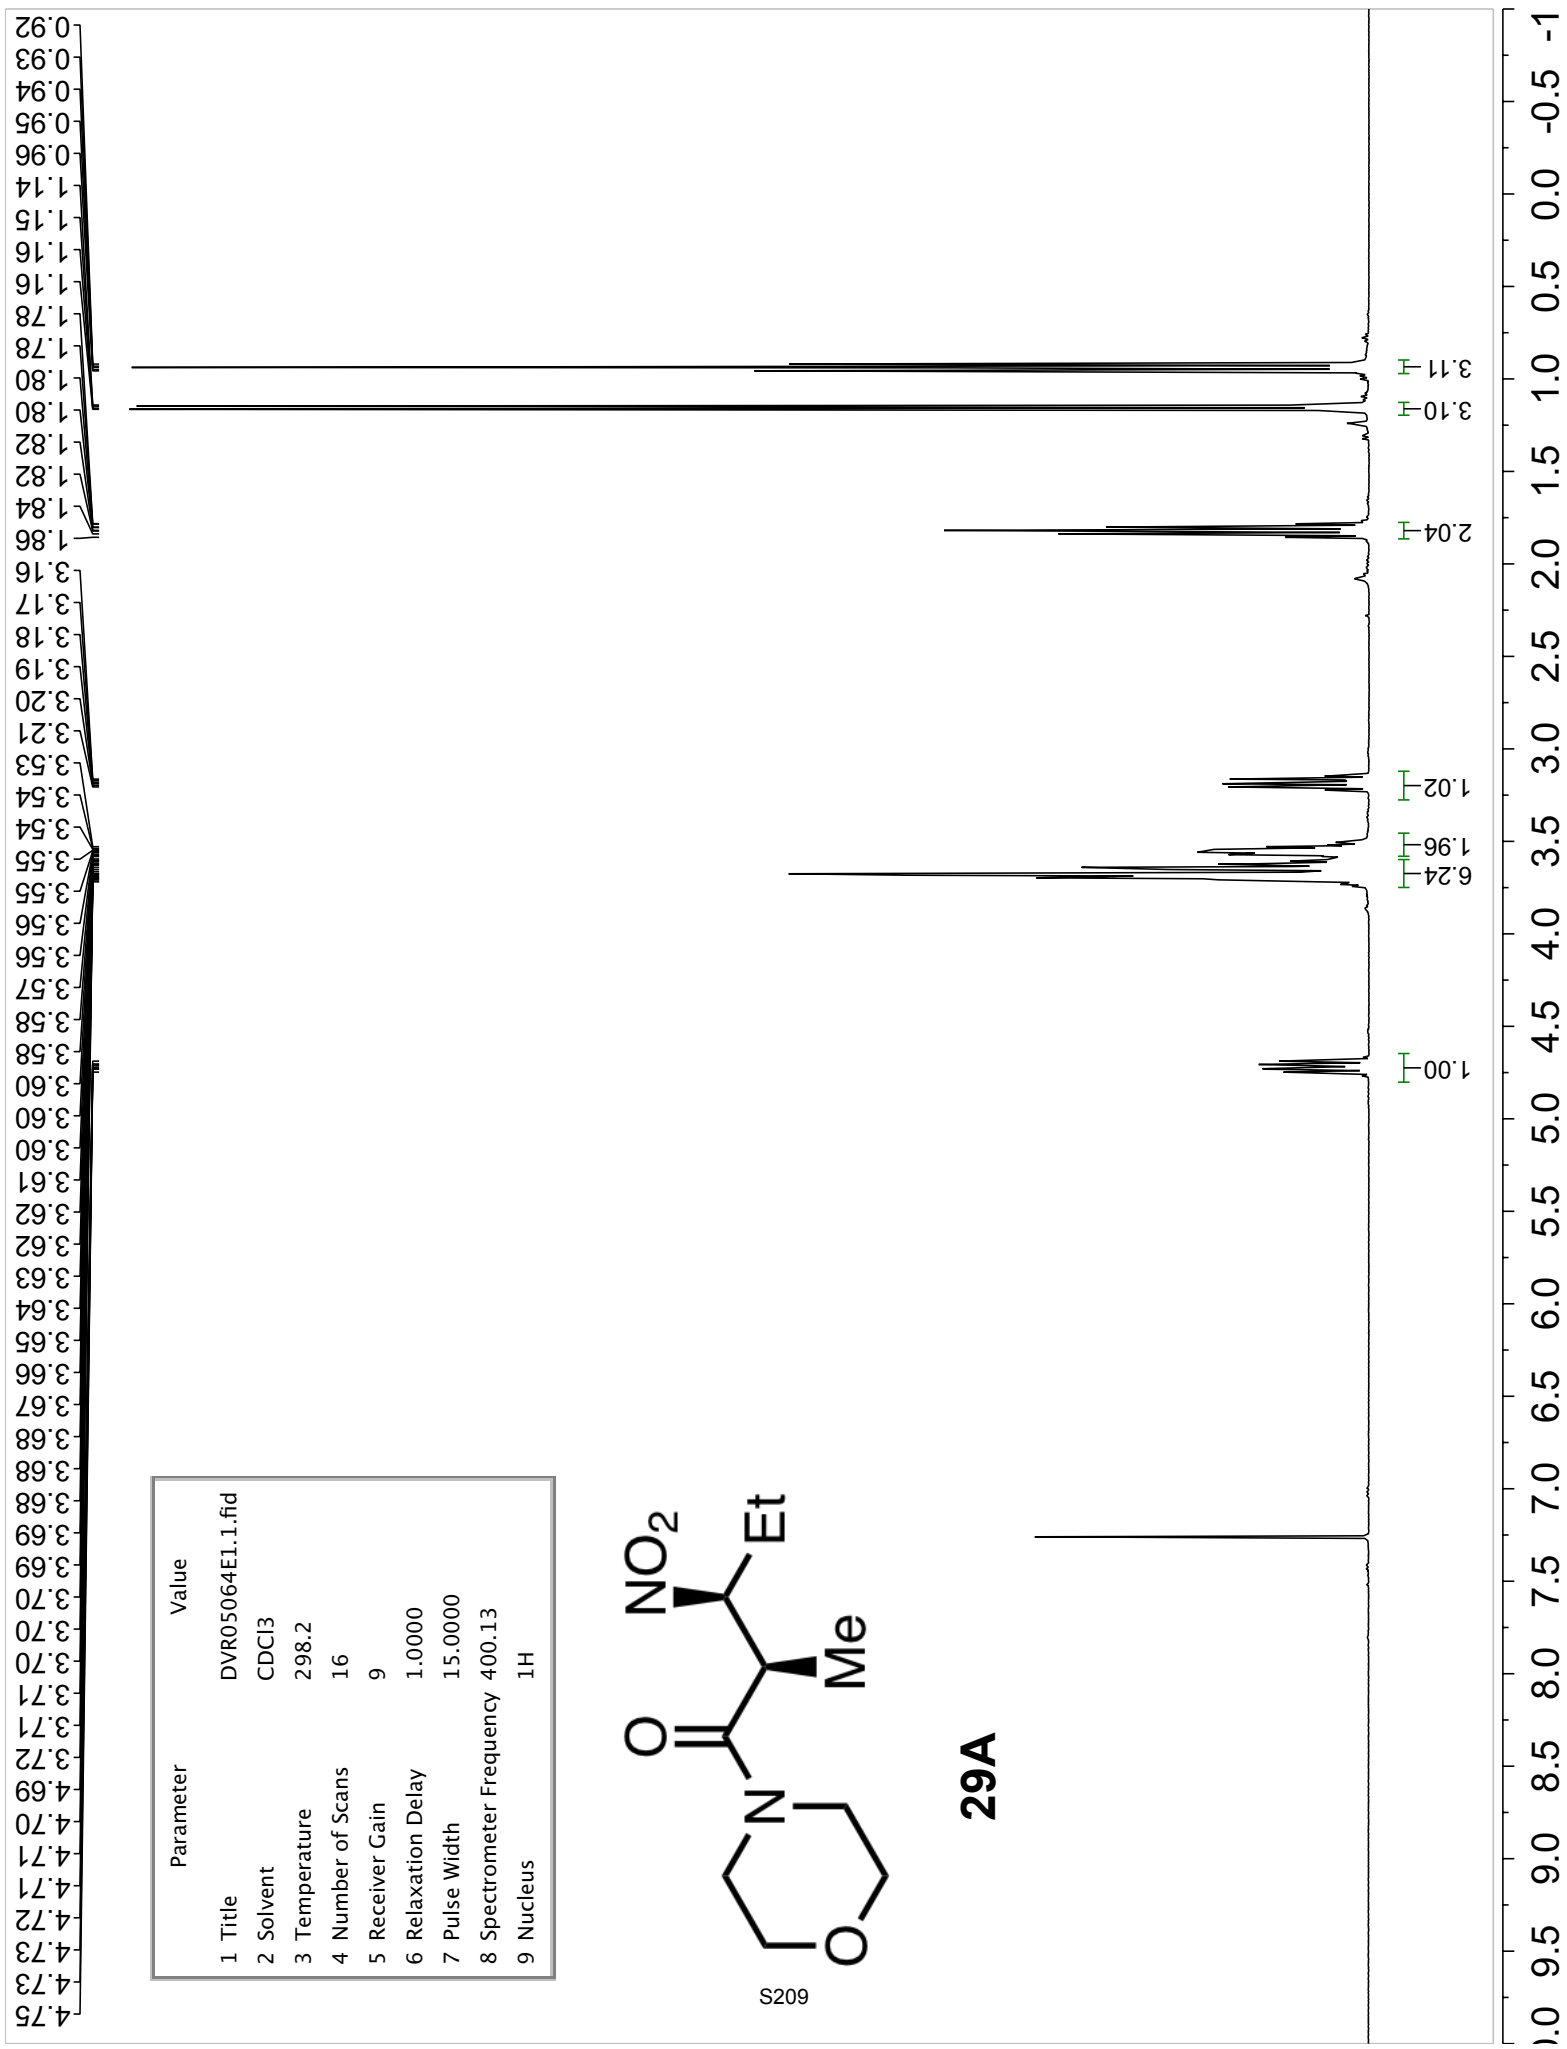

| Parameter                | Value            |
|--------------------------|------------------|
| 1 Title                  | DVR05064E1.1.fid |
| 2 Solvent                | CDCl3            |
| 3 Temperature            | 298.2            |
| 4 Number of Scans        | 16               |
| 5 Receiver Gain          | 9                |
| 6 Relaxation Delay       | 1.0000           |
| 7 Pulse Width            | 15.0000          |
| 8 Spectrometer Frequency | 400.13           |
| 9 Nucleus                | <sup>1</sup> H   |

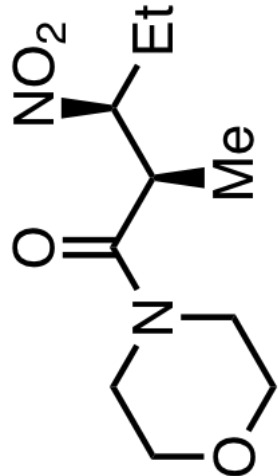

S209

29A

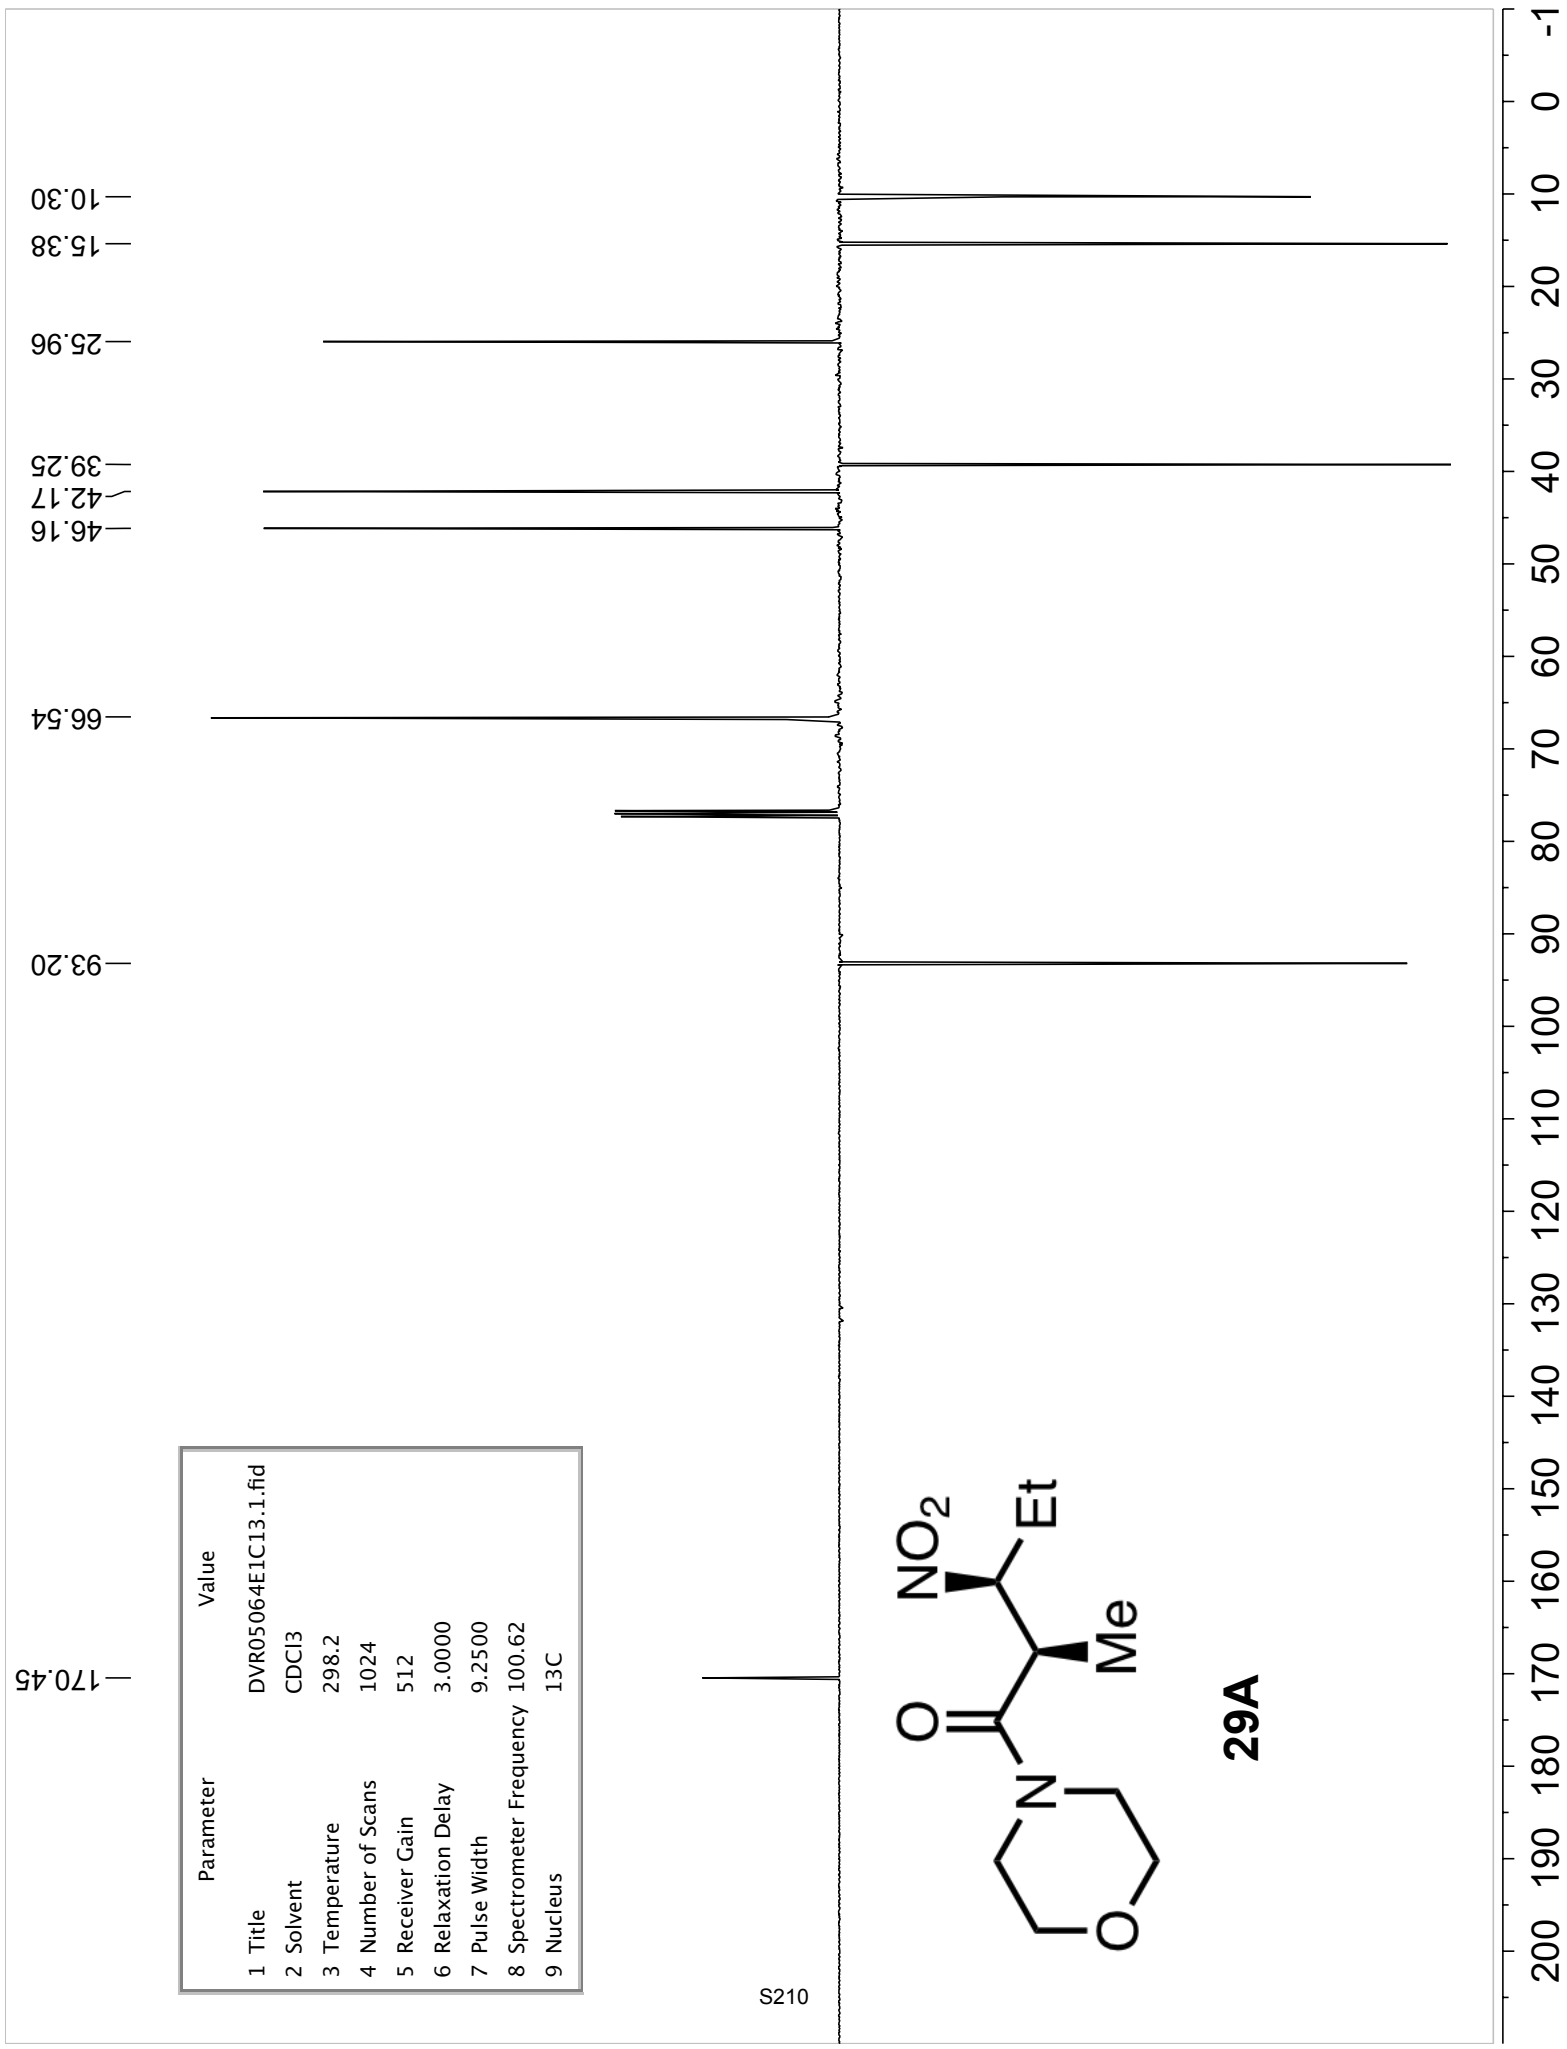



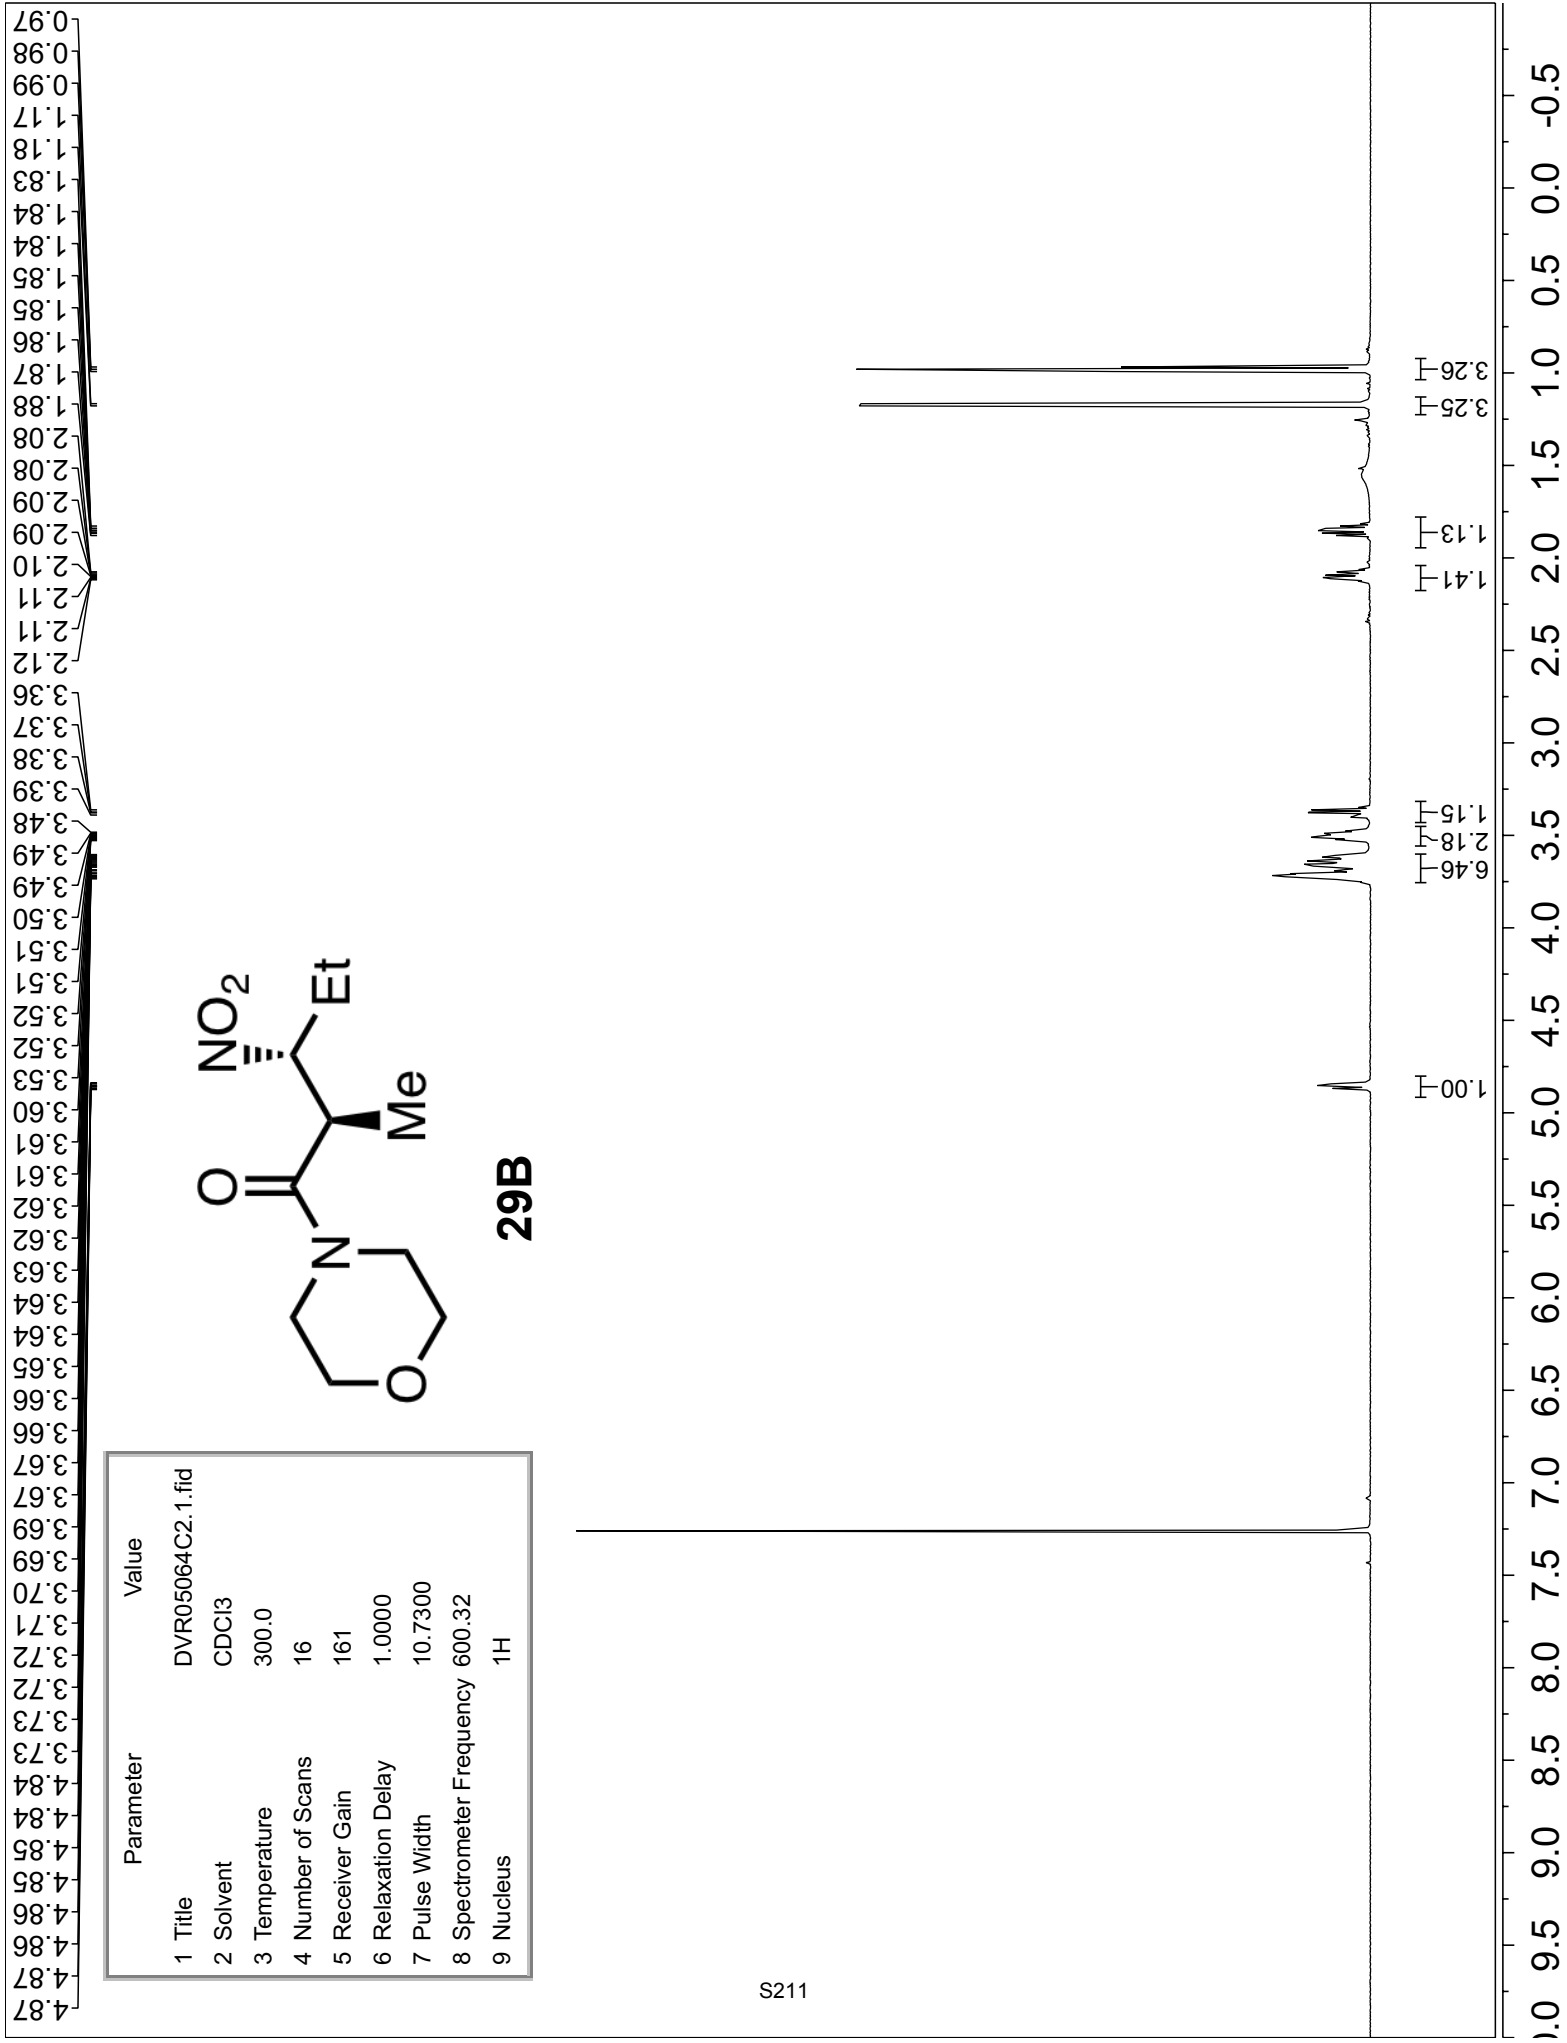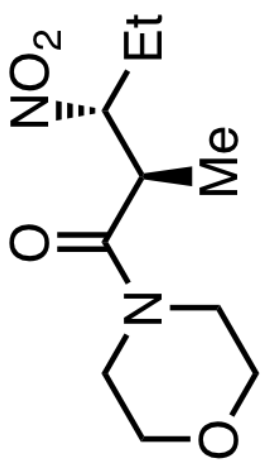

**29B**

| Parameter                | Value            |
|--------------------------|------------------|
| 1 Title                  | DVR05064C2.1.fid |
| 2 Solvent                | CDCl3            |
| 3 Temperature            | 300.0            |
| 4 Number of Scans        | 16               |
| 5 Receiver Gain          | 161              |
| 6 Relaxation Delay       | 1.0000           |
| 7 Pulse Width            | 10.7300          |
| 8 Spectrometer Frequency | 600.32           |
| 9 Nucleus                | 1H               |

— 171.56

| Parameter                | Value                |
|--------------------------|----------------------|
| 1 Title                  | DVR05064C2 C13.1.fid |
| 2 Solvent                | CDCl3                |
| 3 Temperature            | 298.2                |
| 4 Number of Scans        | 1024                 |
| 5 Receiver Gain          | 512                  |
| 6 Relaxation Delay       | 3.0000               |
| 7 Pulse Width            | 9.2500               |
| 8 Spectrometer Frequency | 100.62               |
| 9 Nucleus                | 13C                  |

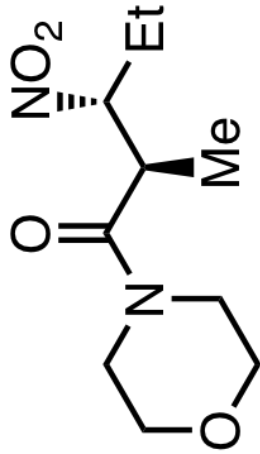

**29B**

— 9.36

— 14.06

— 24.05

~ 37.49

~ 42.32

~ 46.18

— 66.60

— 90.17

10 200 190 180 170 160 150 140 130 120 110 100 90 80 70 60 50 40 30 20 10 0

| Parameter                | Value             |
|--------------------------|-------------------|
| 1 Title                  | DVR05063crd.1.fid |
| 2 Solvent                | CDCI3             |
| 3 Temperature            | 299.4             |
| 4 Number of Scans        | 8                 |
| 5 Receiver Gain          | 181               |
| 6 Relaxation Delay       | 1.0000            |
| 7 Pulse Width            | 15.9700           |
| 8 Spectrometer Frequency | 400.15            |
| 9 Nucleus                | <sup>1</sup> H    |

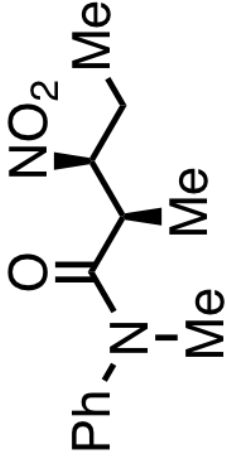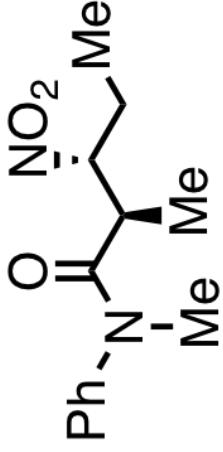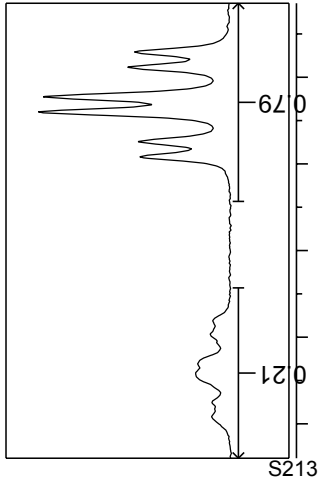

4.85 4.80 4.75 4.70 4.65

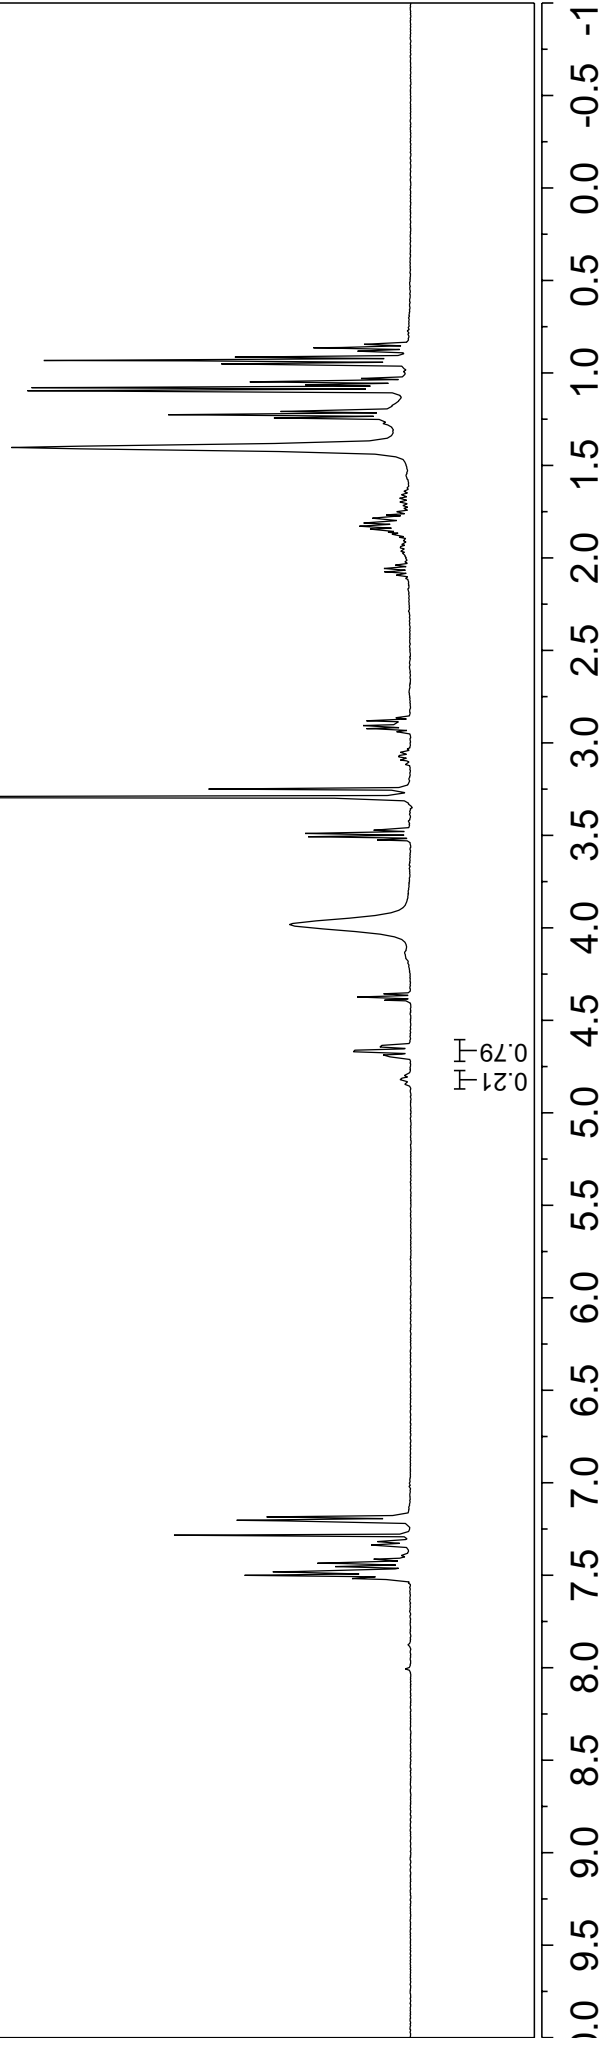

0.21  
0.79

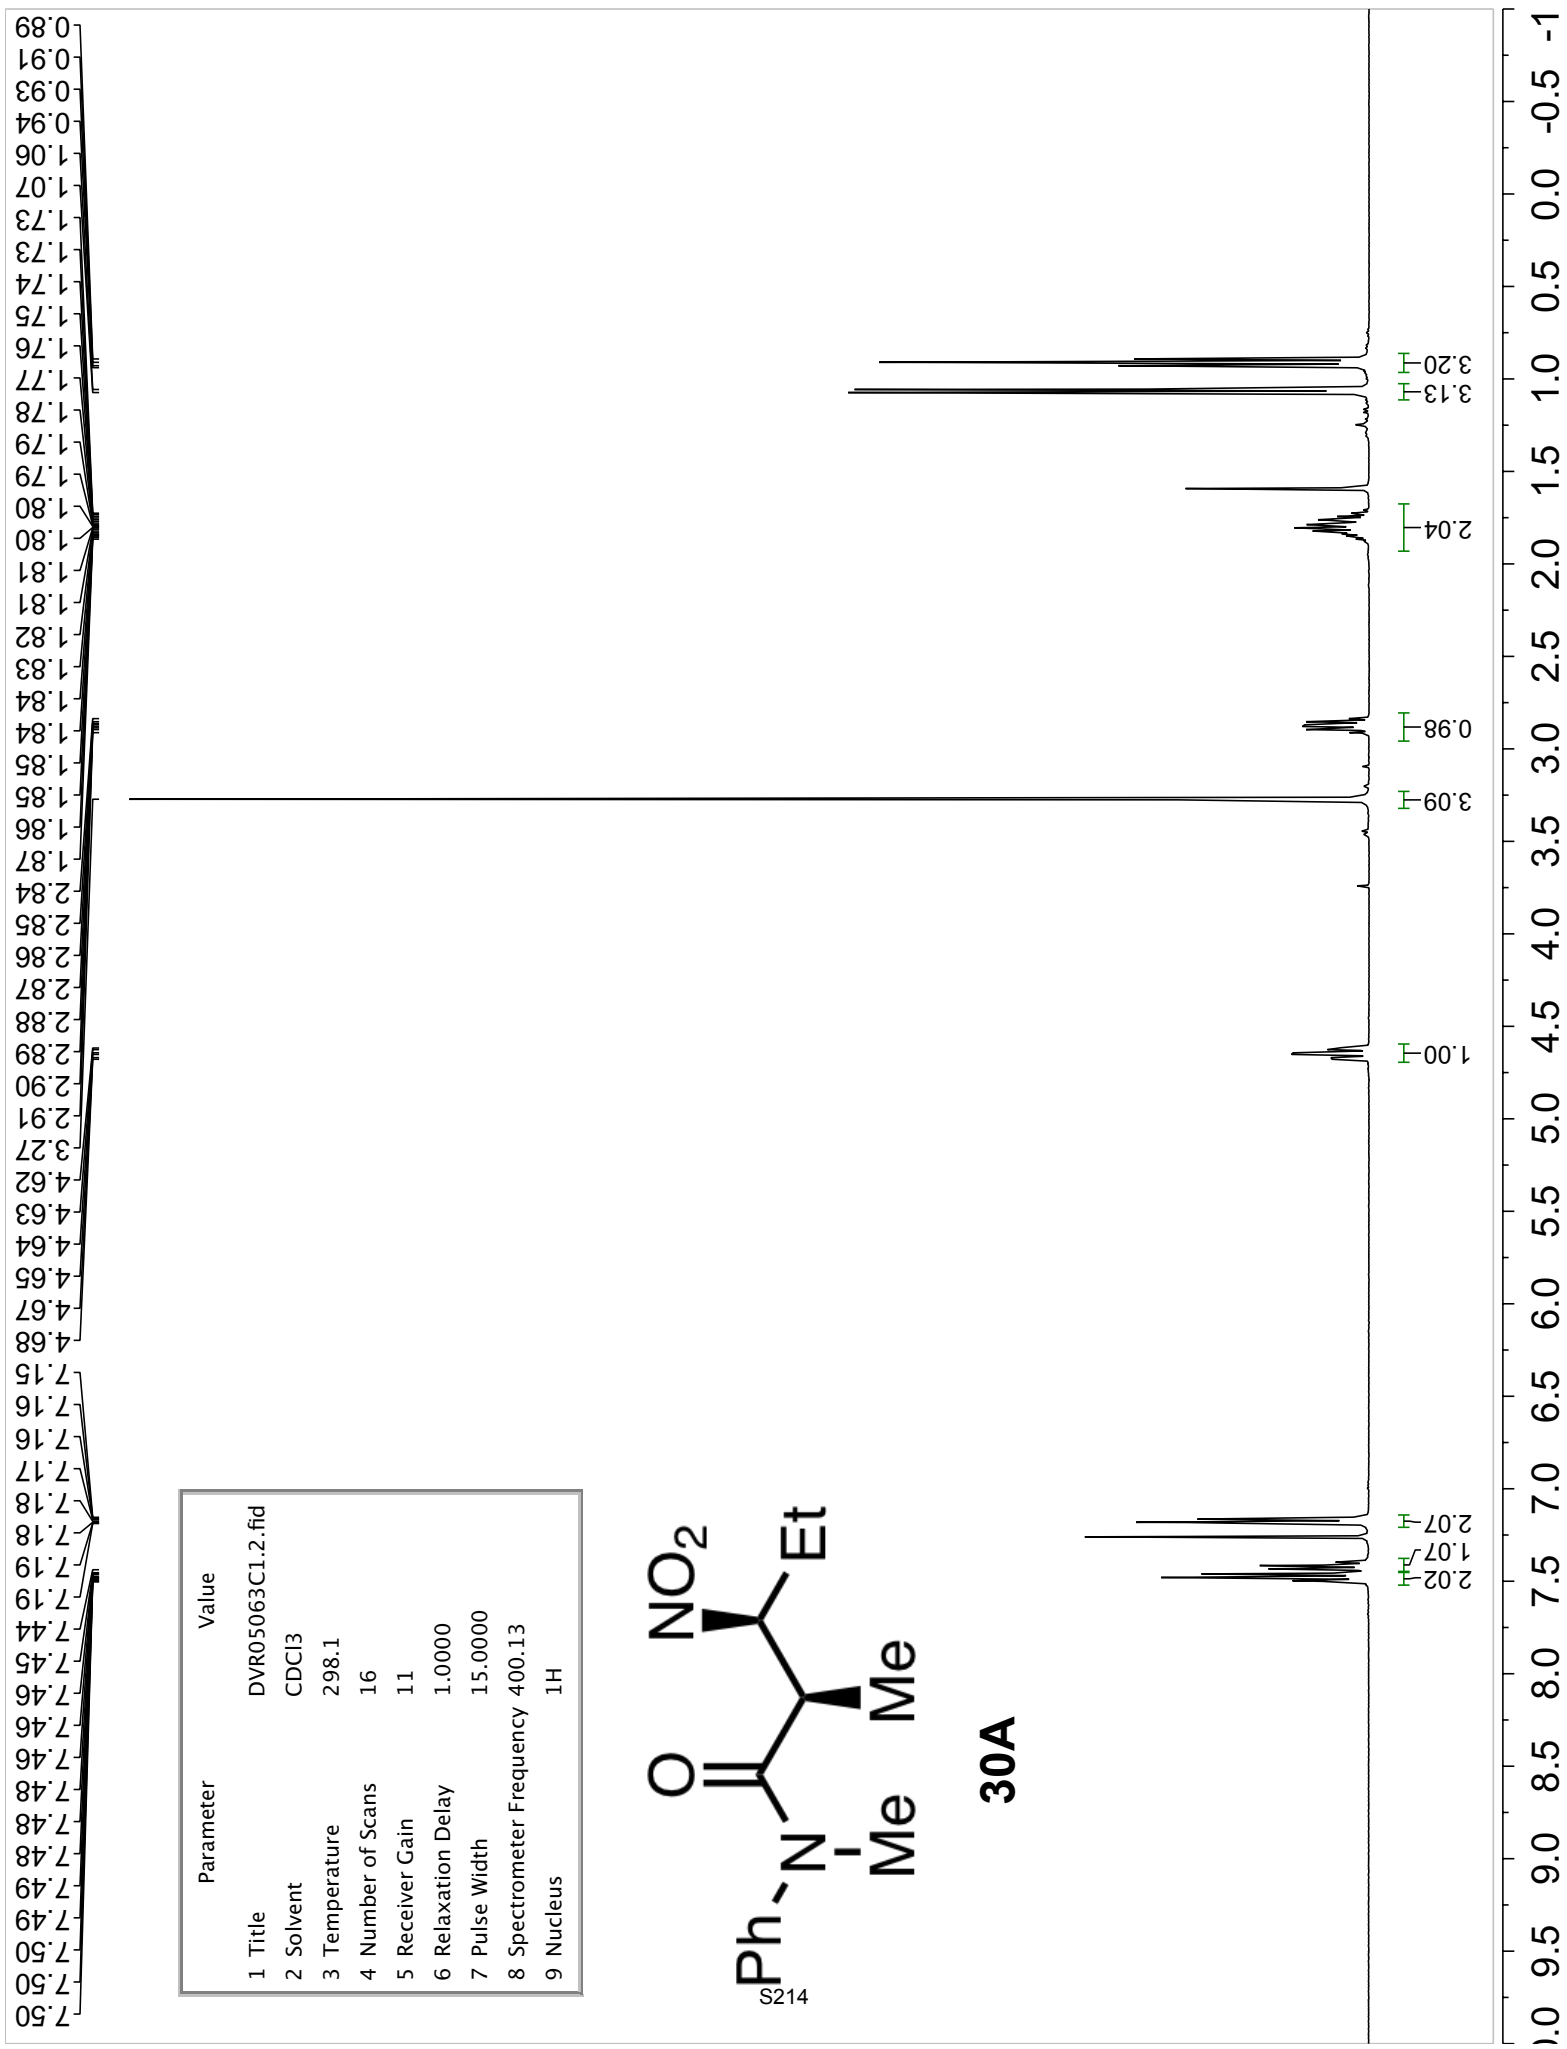

| Parameter                | Value            |
|--------------------------|------------------|
| 1 Title                  | DVR05063C1.2.fid |
| 2 Solvent                | CDCl3            |
| 3 Temperature            | 298.1            |
| 4 Number of Scans        | 16               |
| 5 Receiver Gain          | 11               |
| 6 Relaxation Delay       | 1.0000           |
| 7 Pulse Width            | 15.0000          |
| 8 Spectrometer Frequency | 400.13           |
| 9 Nucleus                | <sup>1</sup> H   |

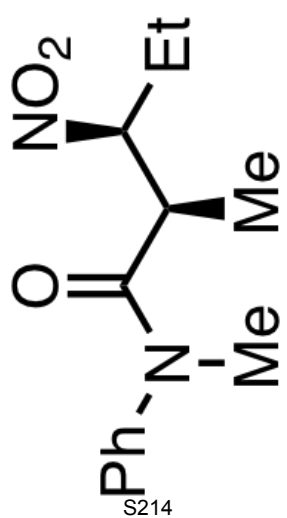

**30A**

| Parameter                | Value                |
|--------------------------|----------------------|
| 1 Title                  | DVR05063C1 C13.1.fid |
| 2 Solvent                | CDCl3                |
| 3 Temperature            | 298.2                |
| 4 Number of Scans        | 1024                 |
| 5 Receiver Gain          | 512                  |
| 6 Relaxation Delay       | 3.0000               |
| 7 Pulse Width            | 9.2500               |
| 8 Spectrometer Frequency | 100.62               |
| 9 Nucleus                | <sup>13</sup> C      |

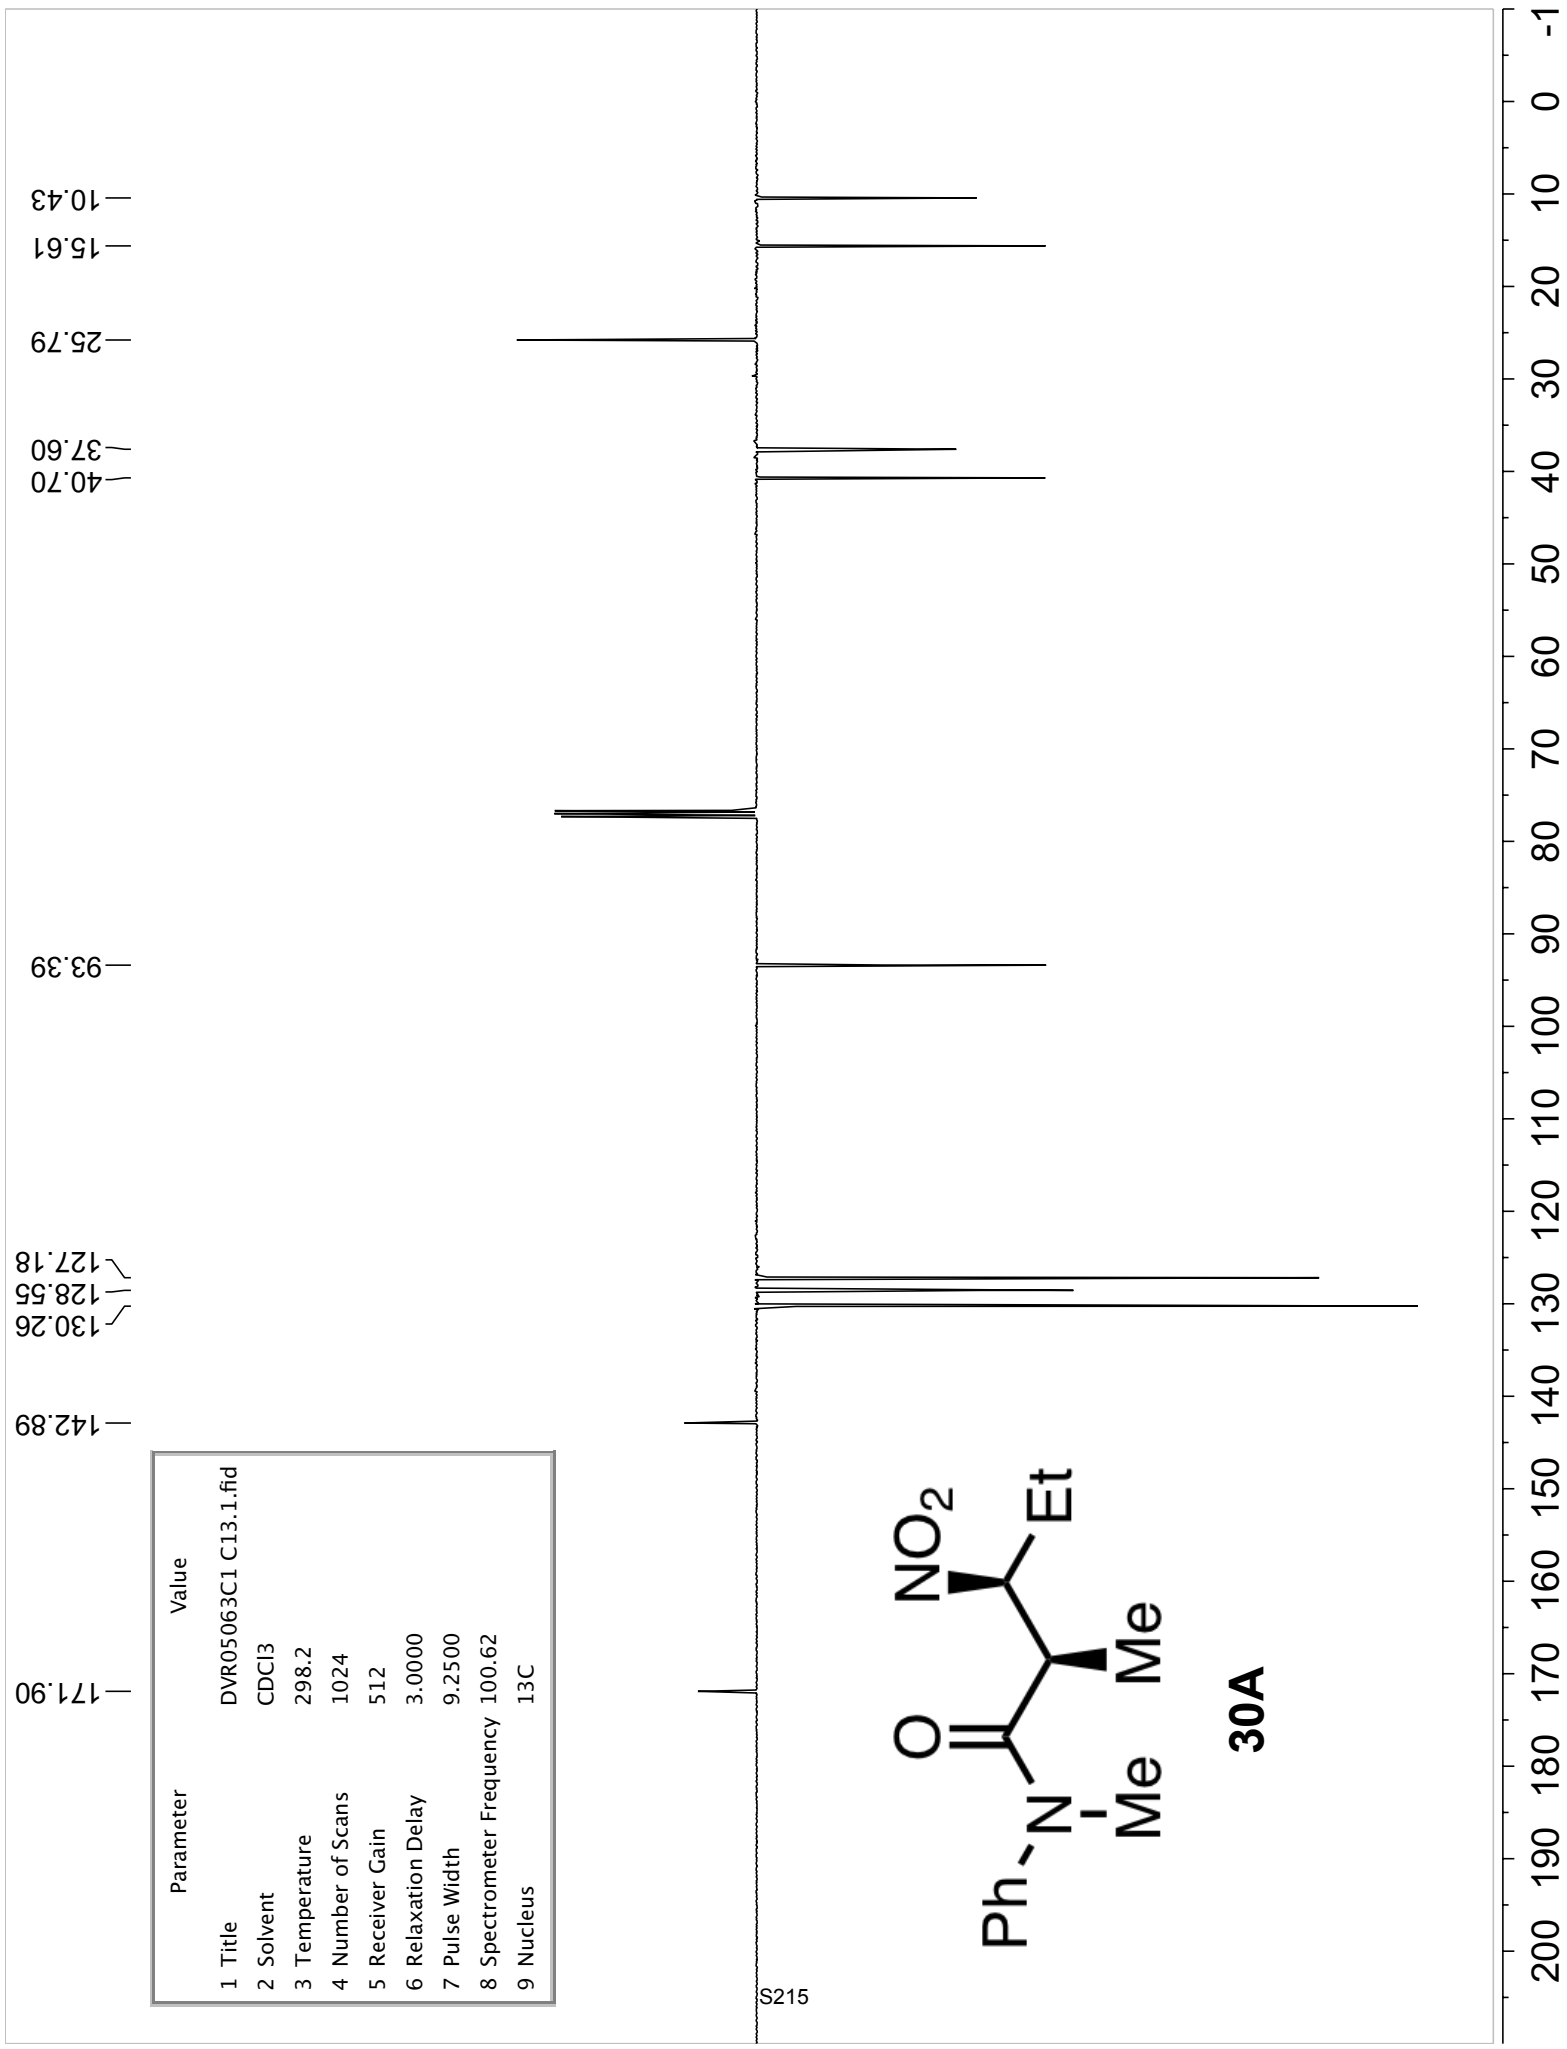

S215

30A

| Parameter                | Value            |
|--------------------------|------------------|
| 1 Title                  | DVR05063D2.1.fid |
| 2 Solvent                | CDCl3            |
| 3 Temperature            | 300.0            |
| 4 Number of Scans        | 16               |
| 5 Receiver Gain          | 144              |
| 6 Relaxation Delay       | 1.0000           |
| 7 Pulse Width            | 10.7300          |
| 8 Spectrometer Frequency | 600.32           |
| 9 Nucleus                | <sup>1</sup> H   |

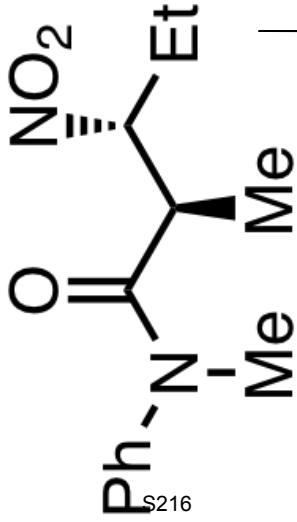

30B

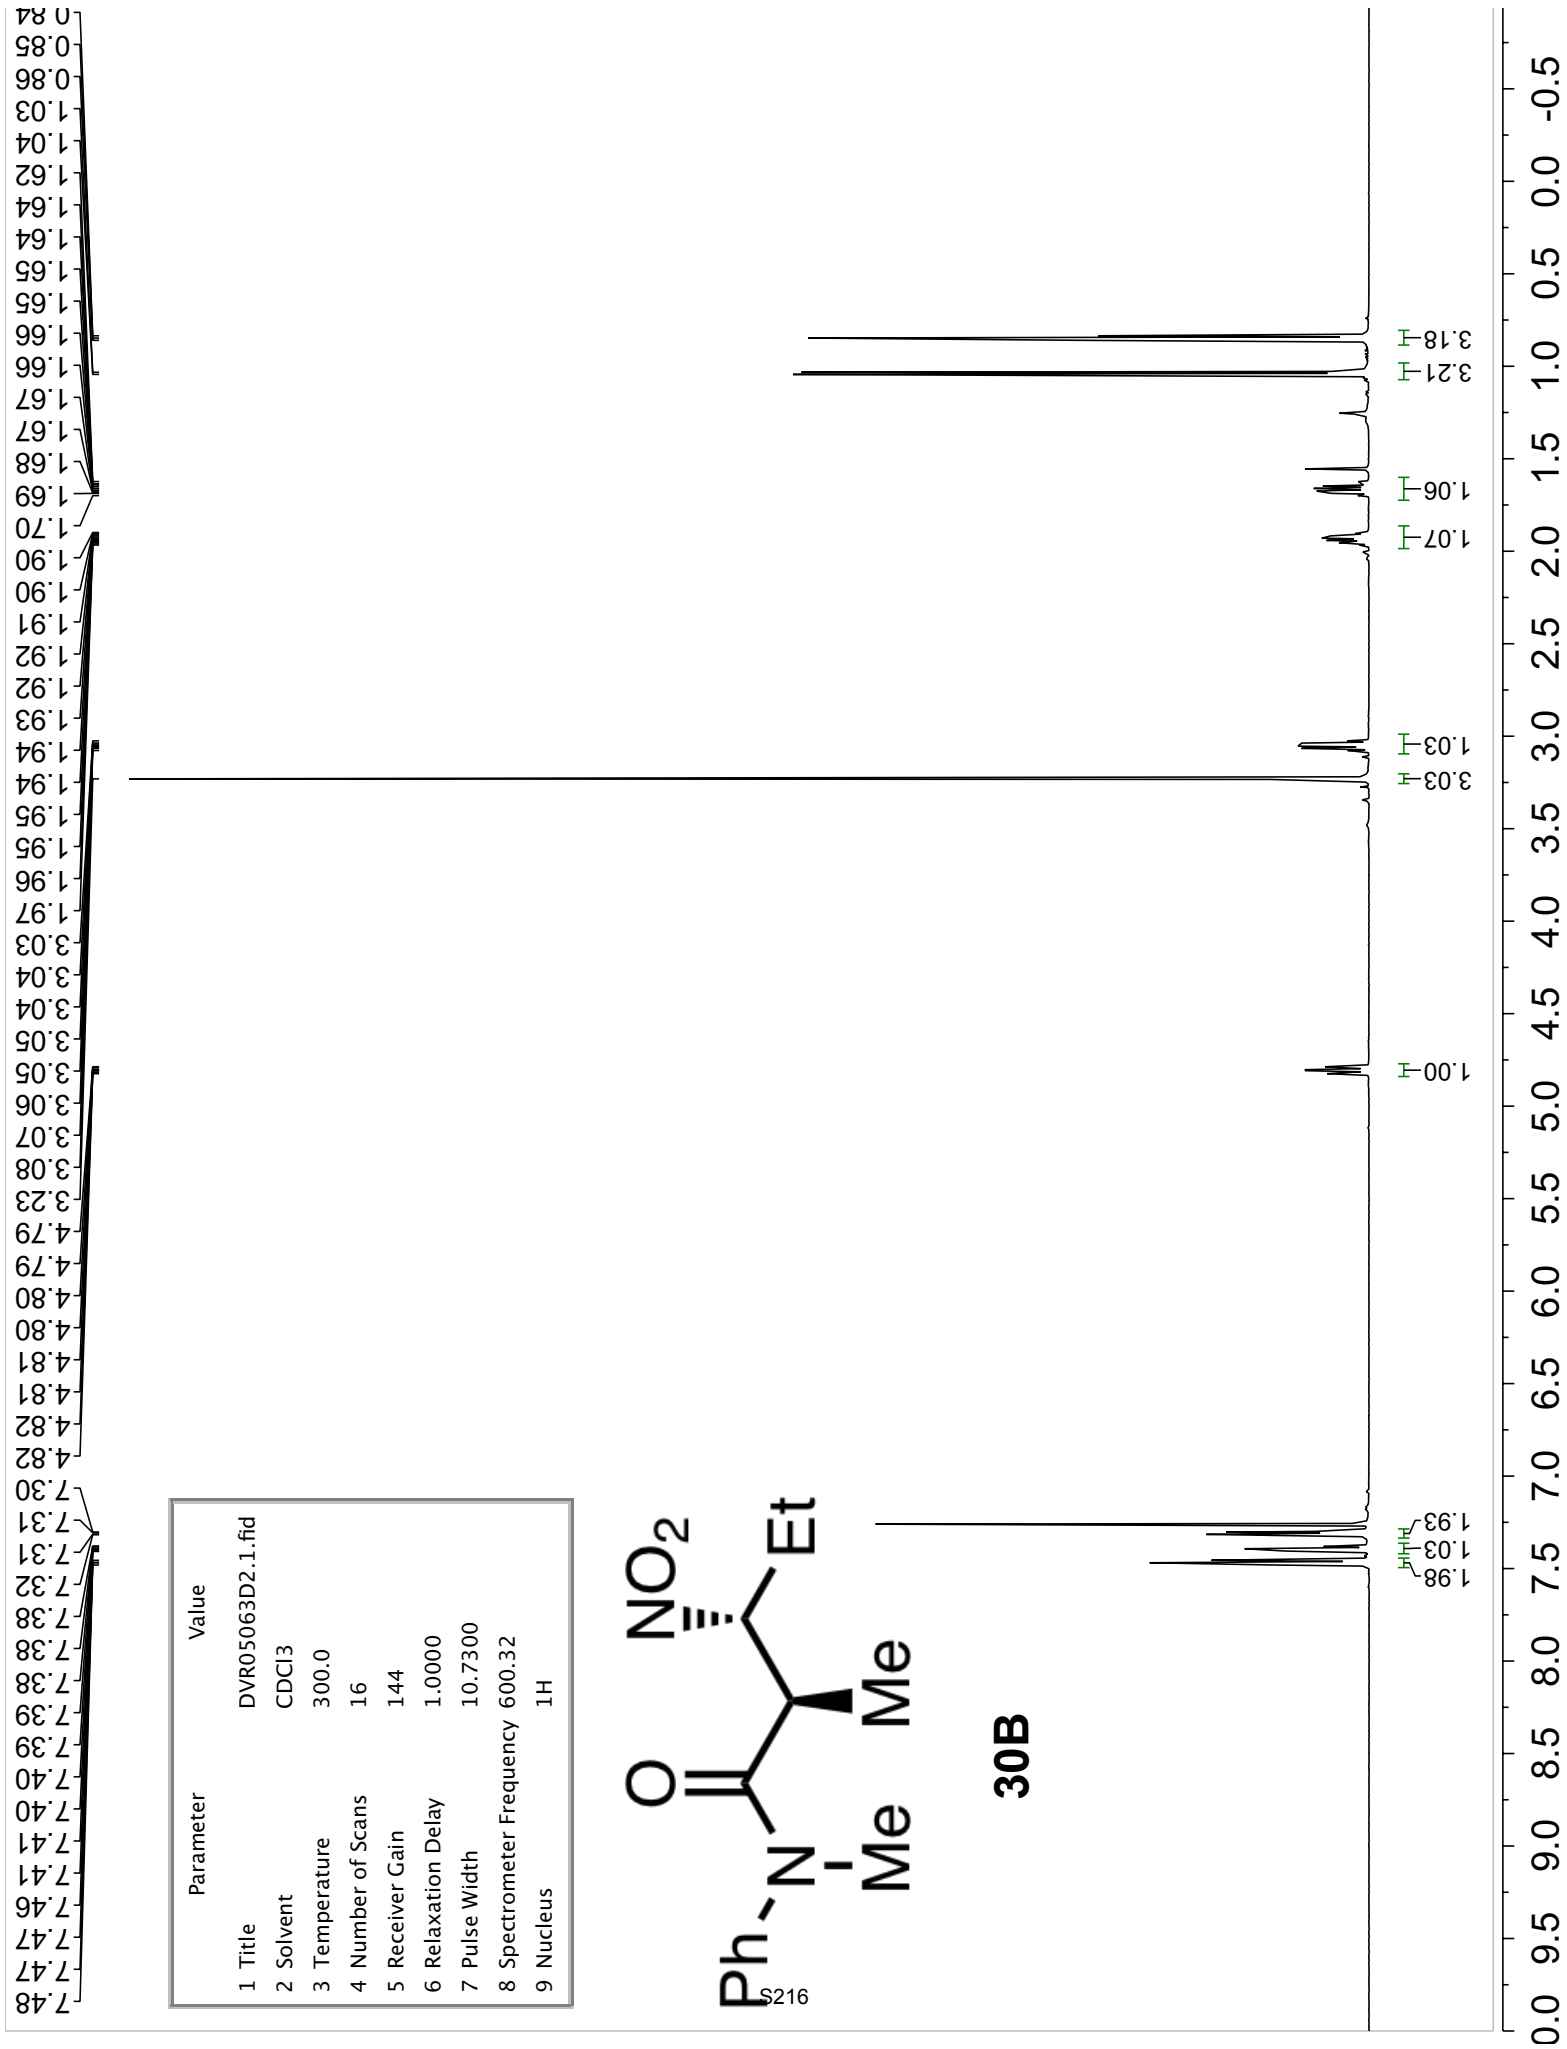

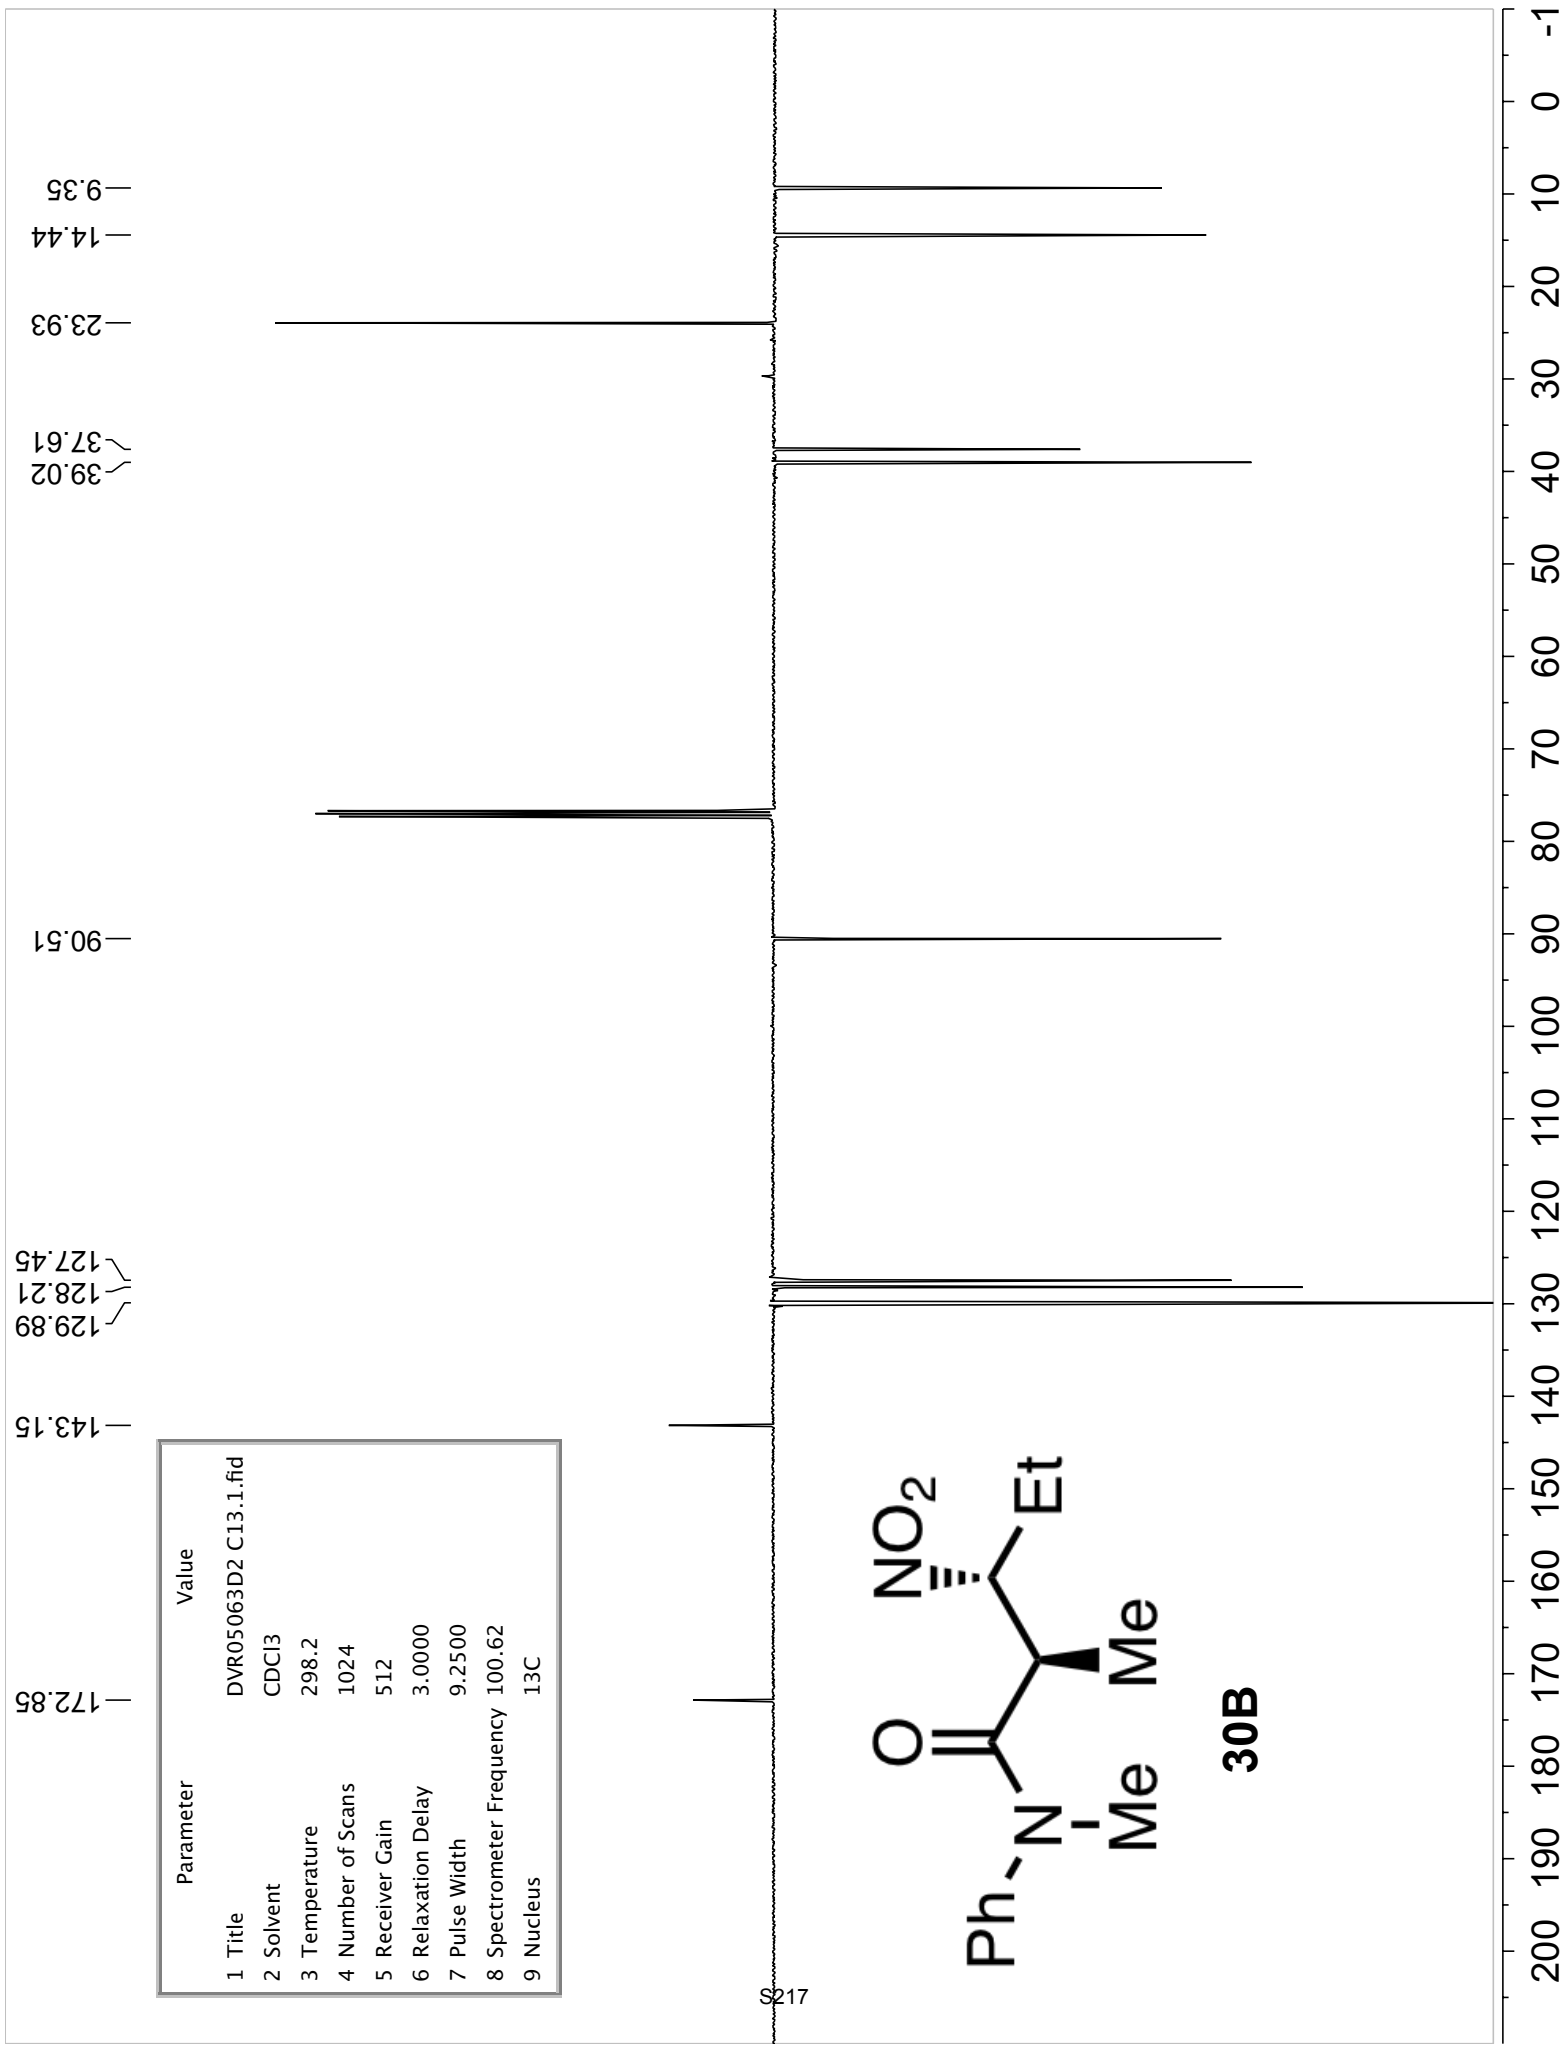

| Parameter                | Value             |
|--------------------------|-------------------|
| 1 Title                  | DVR05058CRD.1.fid |
| 2 Solvent                | CDCl3             |
| 3 Temperature            | 300.0             |
| 4 Number of Scans        | 16                |
| 5 Receiver Gain          | 181               |
| 6 Relaxation Delay       | 1.0000            |
| 7 Pulse Width            | 13.1400           |
| 8 Spectrometer Frequency | 600.32            |
| 9 Nucleus                | <sup>1</sup> H    |

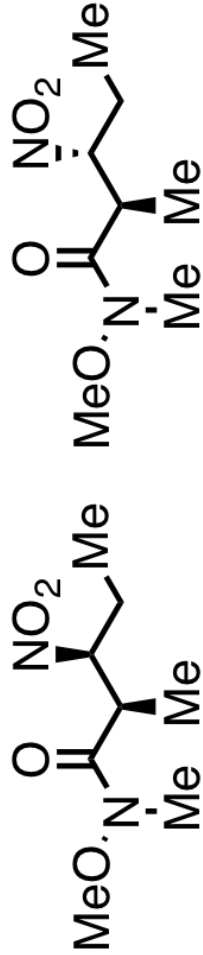

**Crude**  
**92:08**  
**31B**

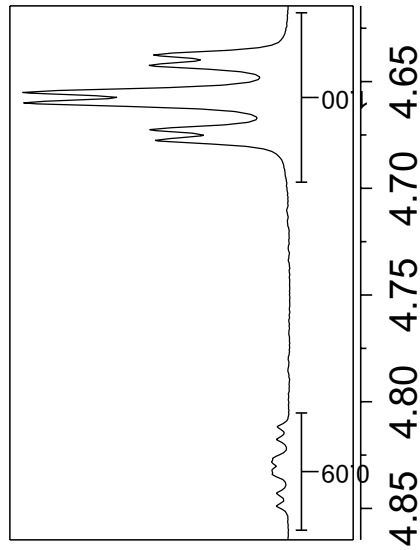

1.00  
0.60

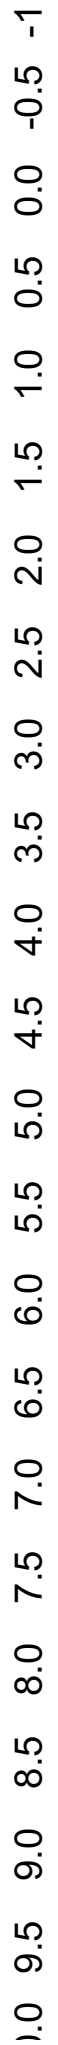



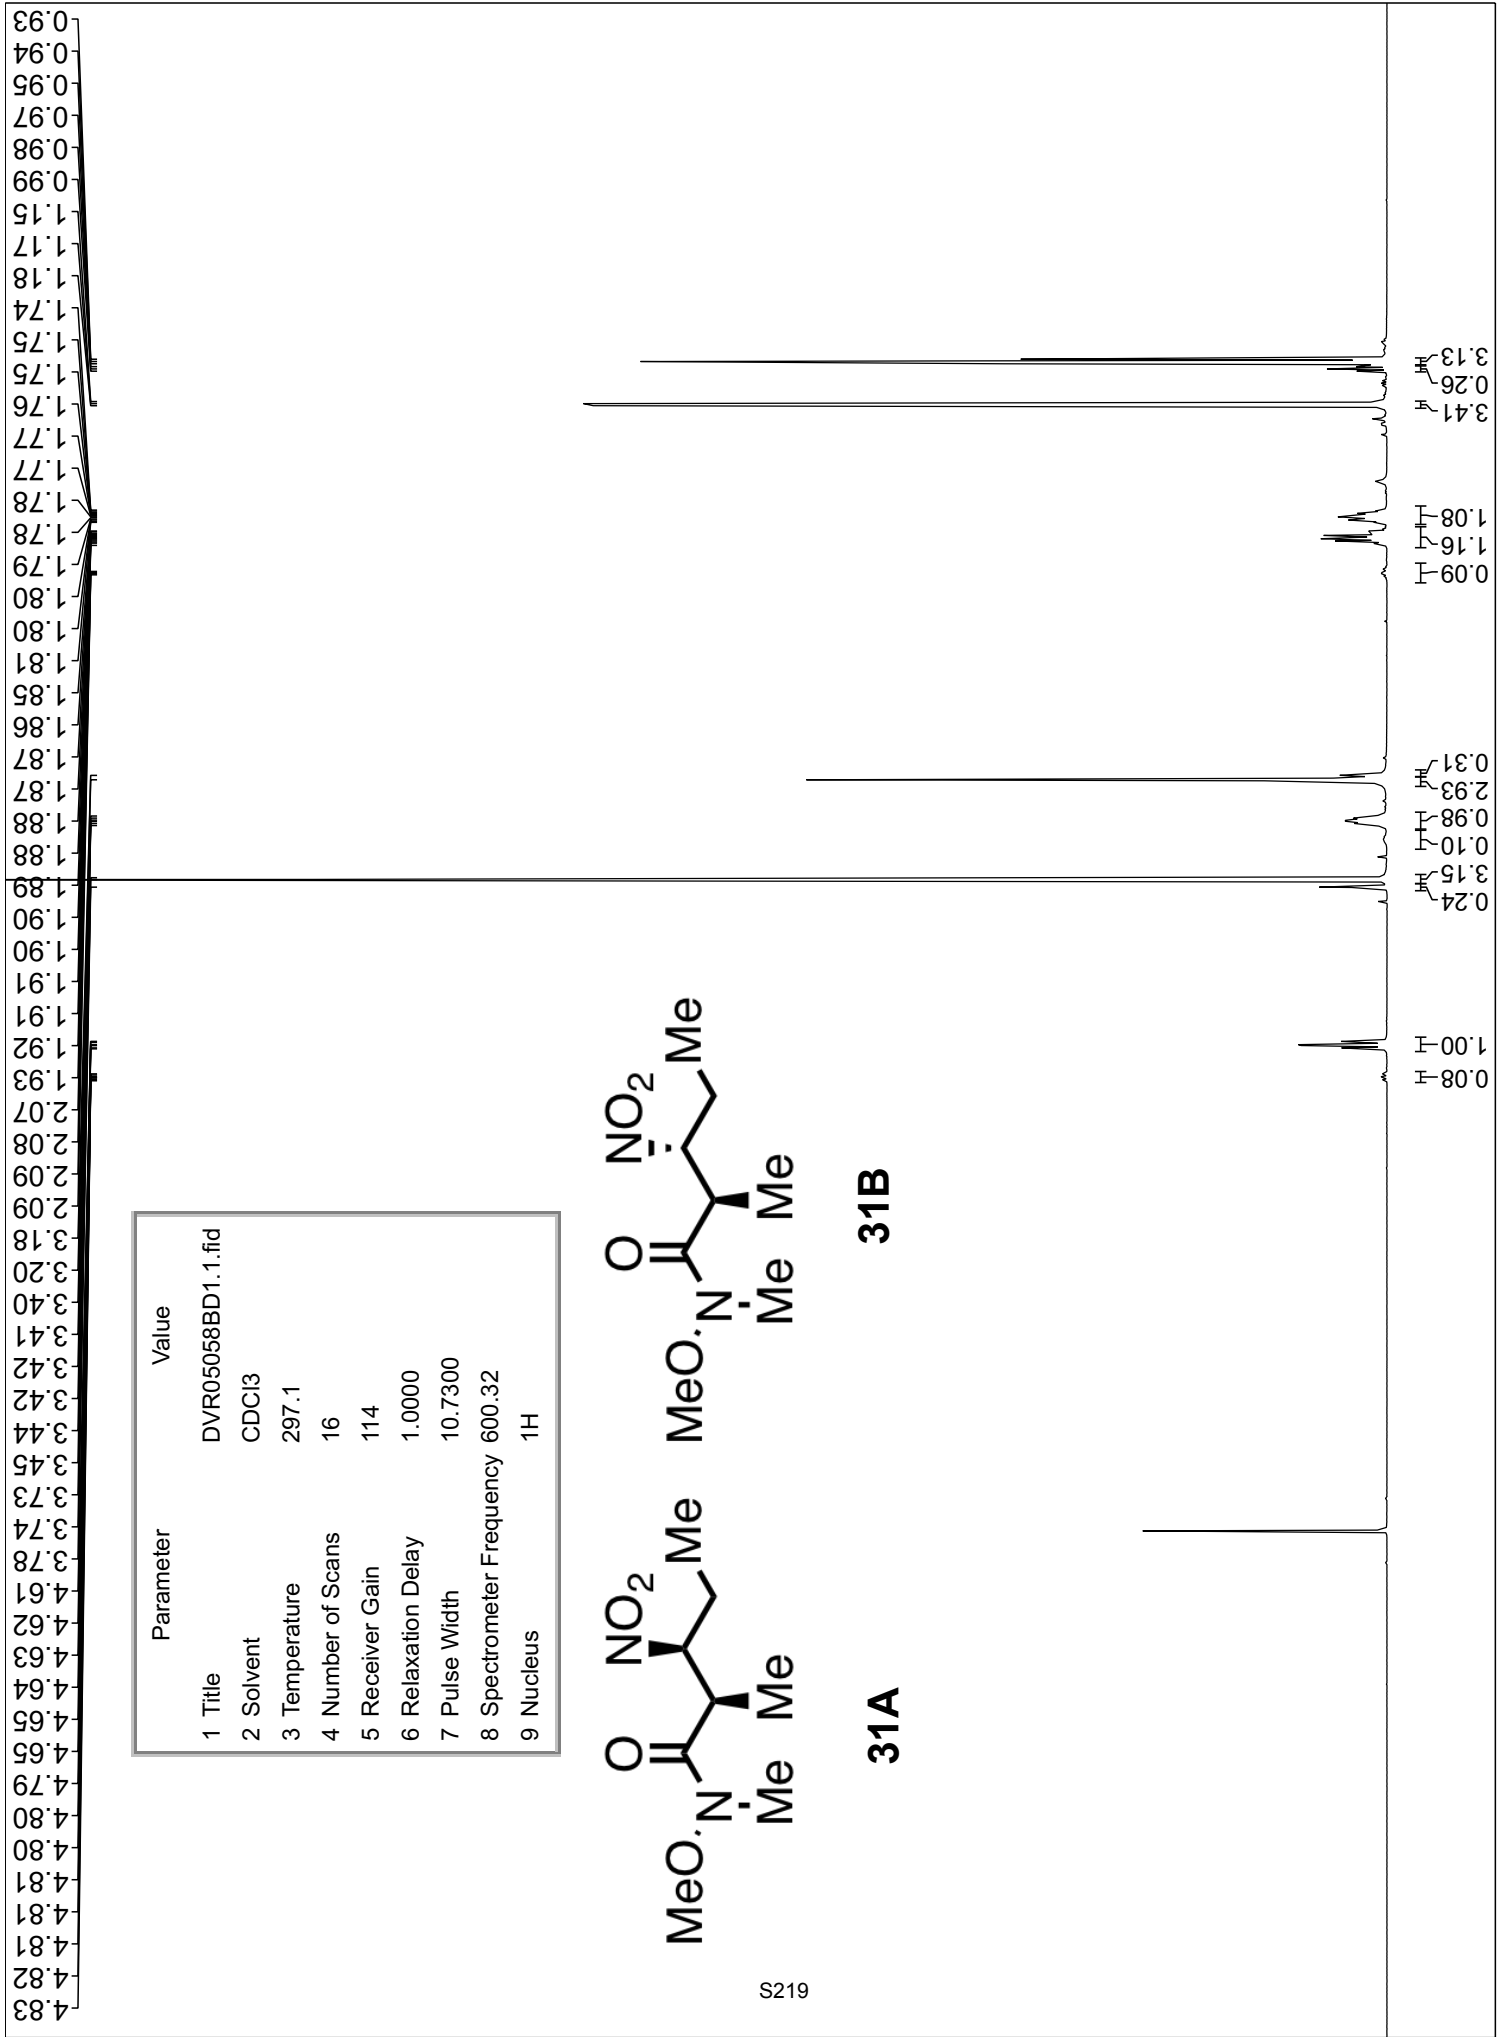

| Parameter                | Value             |
|--------------------------|-------------------|
| 1 Title                  | DVR05058BD1.1.fid |
| 2 Solvent                | CDCl3             |
| 3 Temperature            | 297.1             |
| 4 Number of Scans        | 16                |
| 5 Receiver Gain          | 114               |
| 6 Relaxation Delay       | 1.0000            |
| 7 Pulse Width            | 10.7300           |
| 8 Spectrometer Frequency | 600.32            |
| 9 Nucleus                | 1H                |

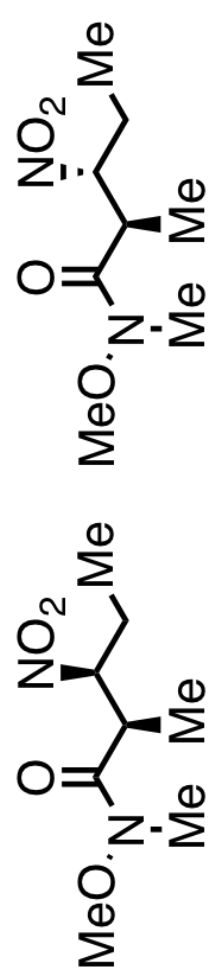

172.95

| Parameter                | Value                 |
|--------------------------|-----------------------|
| 1 Title                  | DVR05058BD1 C13.1.fid |
| 2 Solvent                | CDCl3                 |
| 3 Temperature            | 298.2                 |
| 4 Number of Scans        | 1024                  |
| 5 Receiver Gain          | 512                   |
| 6 Relaxation Delay       | 3.0000                |
| 7 Pulse Width            | 9.2500                |
| 8 Spectrometer Frequency | 100.62                |
| 9 Nucleus                | <sup>13</sup> C       |

92.77  
89.55  
61.80  
61.37  
39.41  
38.11  
32.14  
31.96  
25.89  
23.88  
15.05  
13.61  
10.32  
9.31

S220

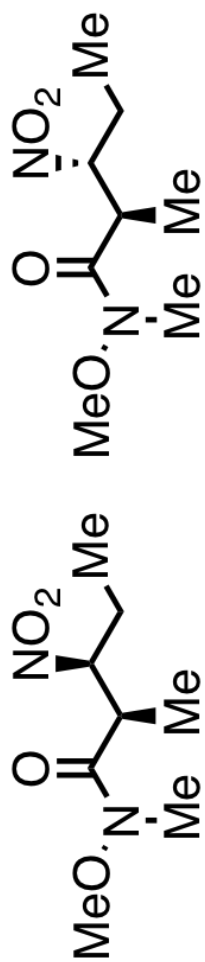

200 190 180 170 160 150 140 130 120 110 100 90 80 70 60 50 40 30 20 10 0 -1

| Parameter                | Value            |
|--------------------------|------------------|
| 1 Title                  | DVR05098D1.1.fid |
| 2 Solvent                | CDCl3            |
| 3 Temperature            | 298.2            |
| 4 Number of Scans        | 16               |
| 5 Receiver Gain          | 9                |
| 6 Relaxation Delay       | 1.0000           |
| 7 Pulse Width            | 15.0000          |
| 8 Spectrometer Frequency | 400.13           |
| 9 Nucleus                | <sup>1</sup> H   |

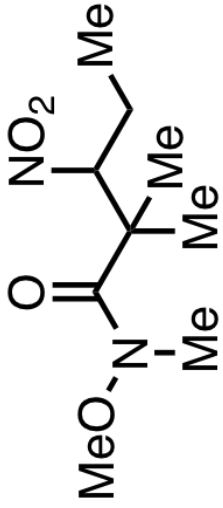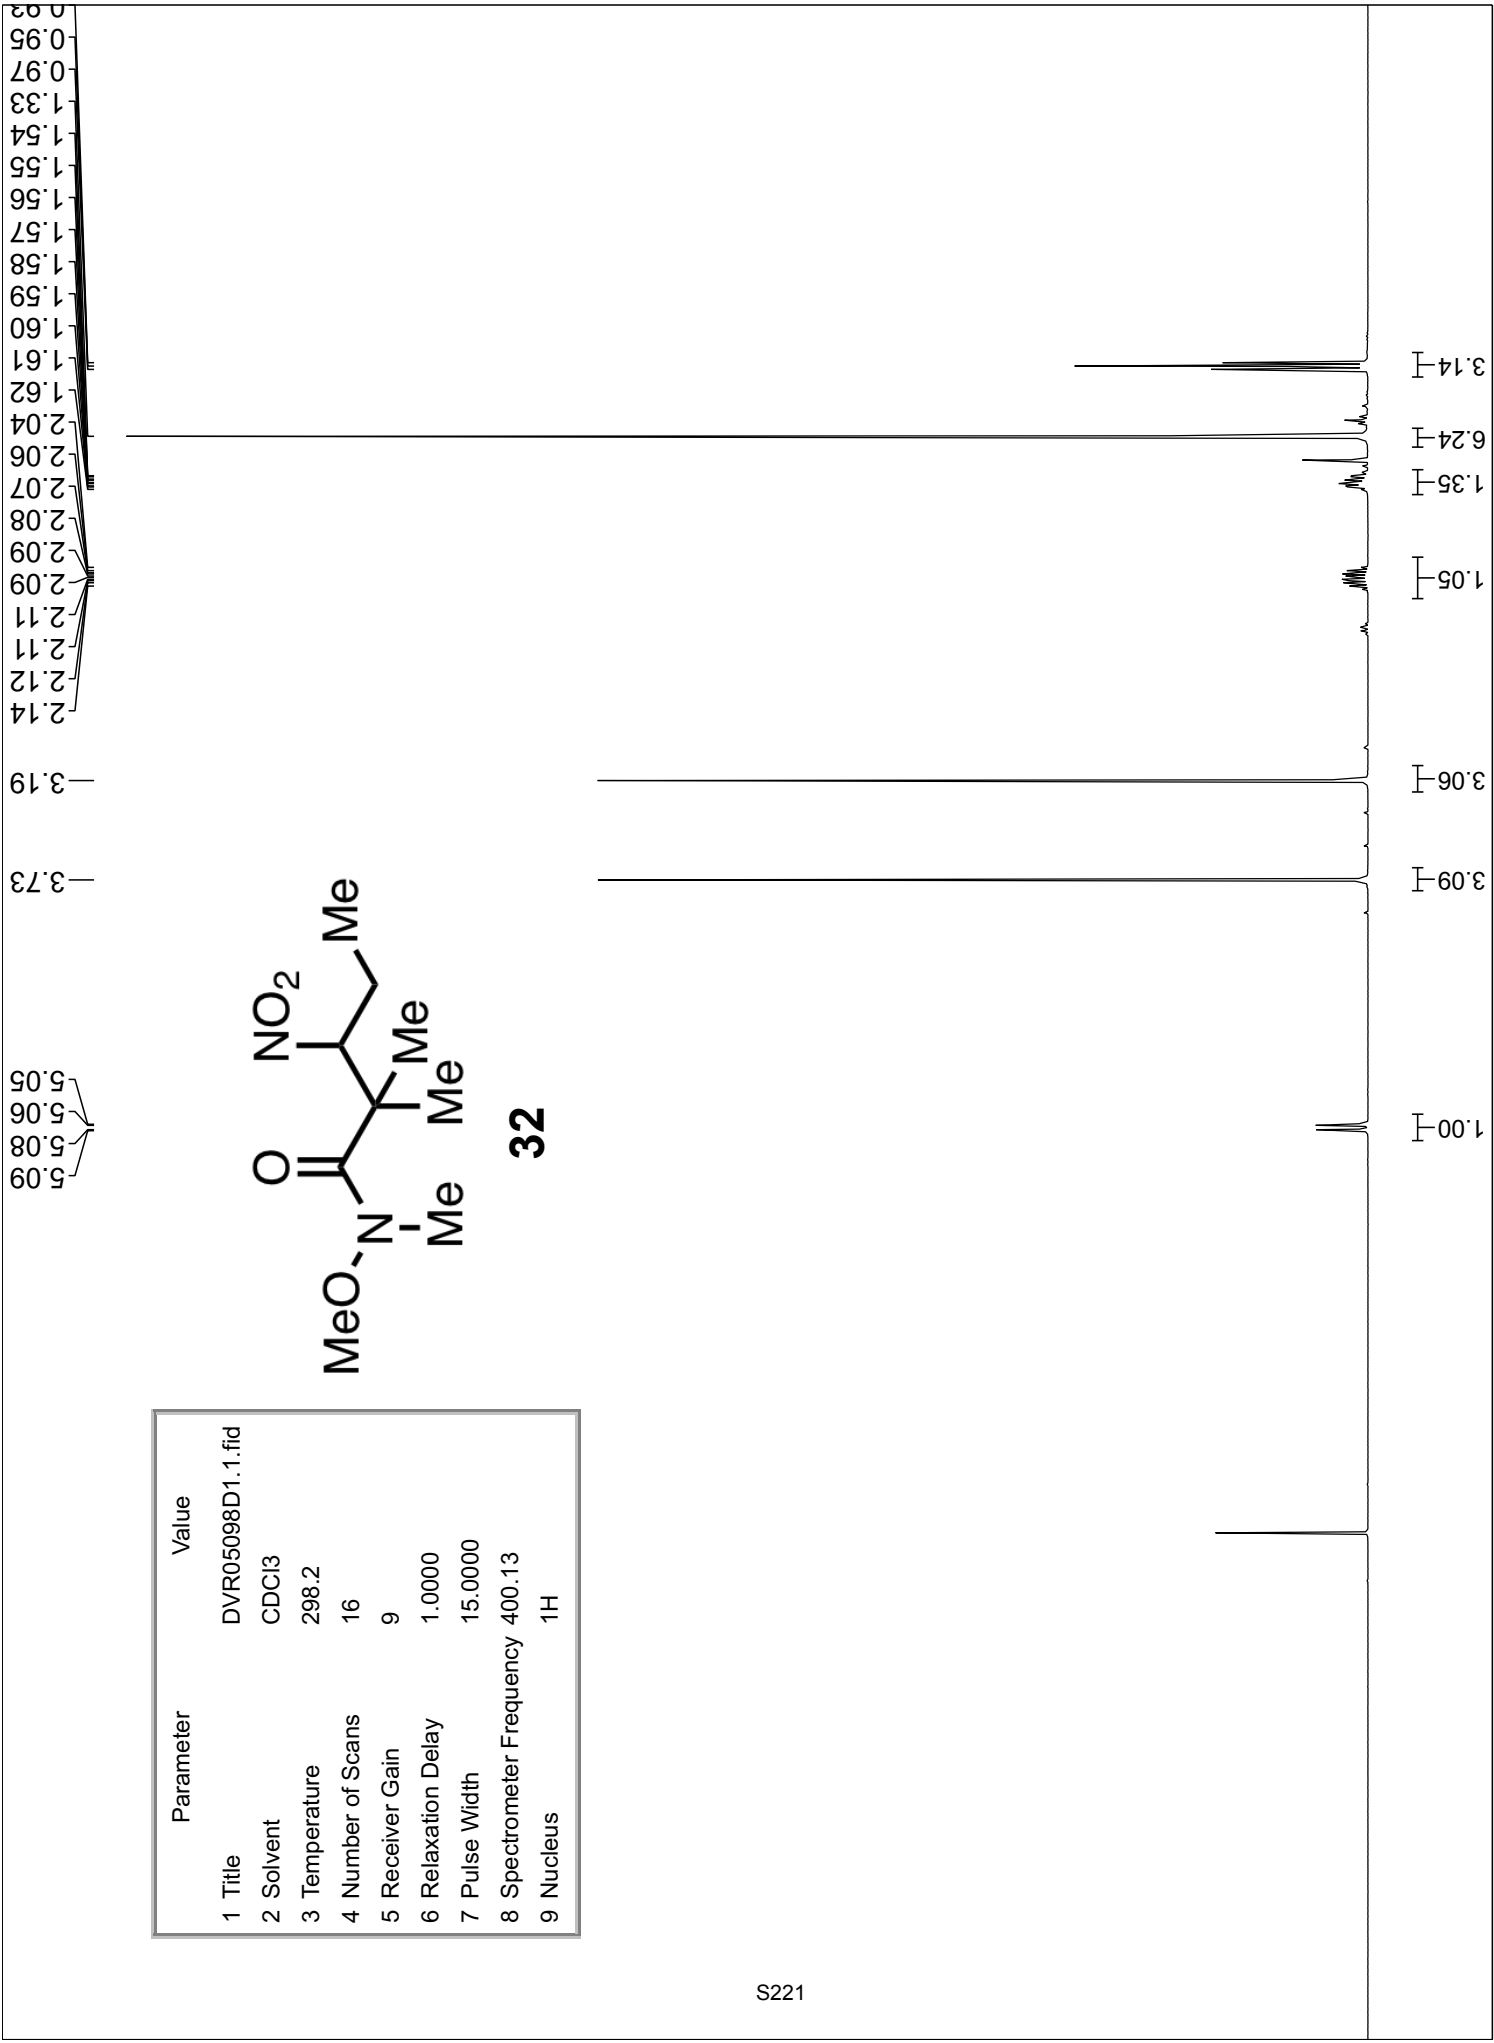

174.61  
94.28  
60.78  
46.54  
34.14  
22.34  
22.05  
20.25  
11.15

Parameter Value

|                          |                   |
|--------------------------|-------------------|
| 1 Title                  | DVR05098C13.1.fid |
| 2 Solvent                | CDC13             |
| 3 Temperature            | 298.2             |
| 4 Number of Scans        | 1024              |
| 5 Receiver Gain          | 512               |
| 6 Relaxation Delay       | 3.0000            |
| 7 Pulse Width            | 9.2500            |
| 8 Spectrometer Frequency | 100.62            |
| 9 Nucleus                | <sup>13</sup> C   |

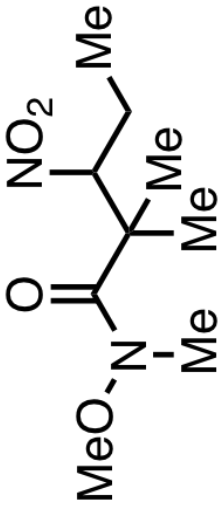

32

S222

200 190 180 170 160 150 140 130 120 110 100 90 80 70 60 50 40 30 20 10 0 -1

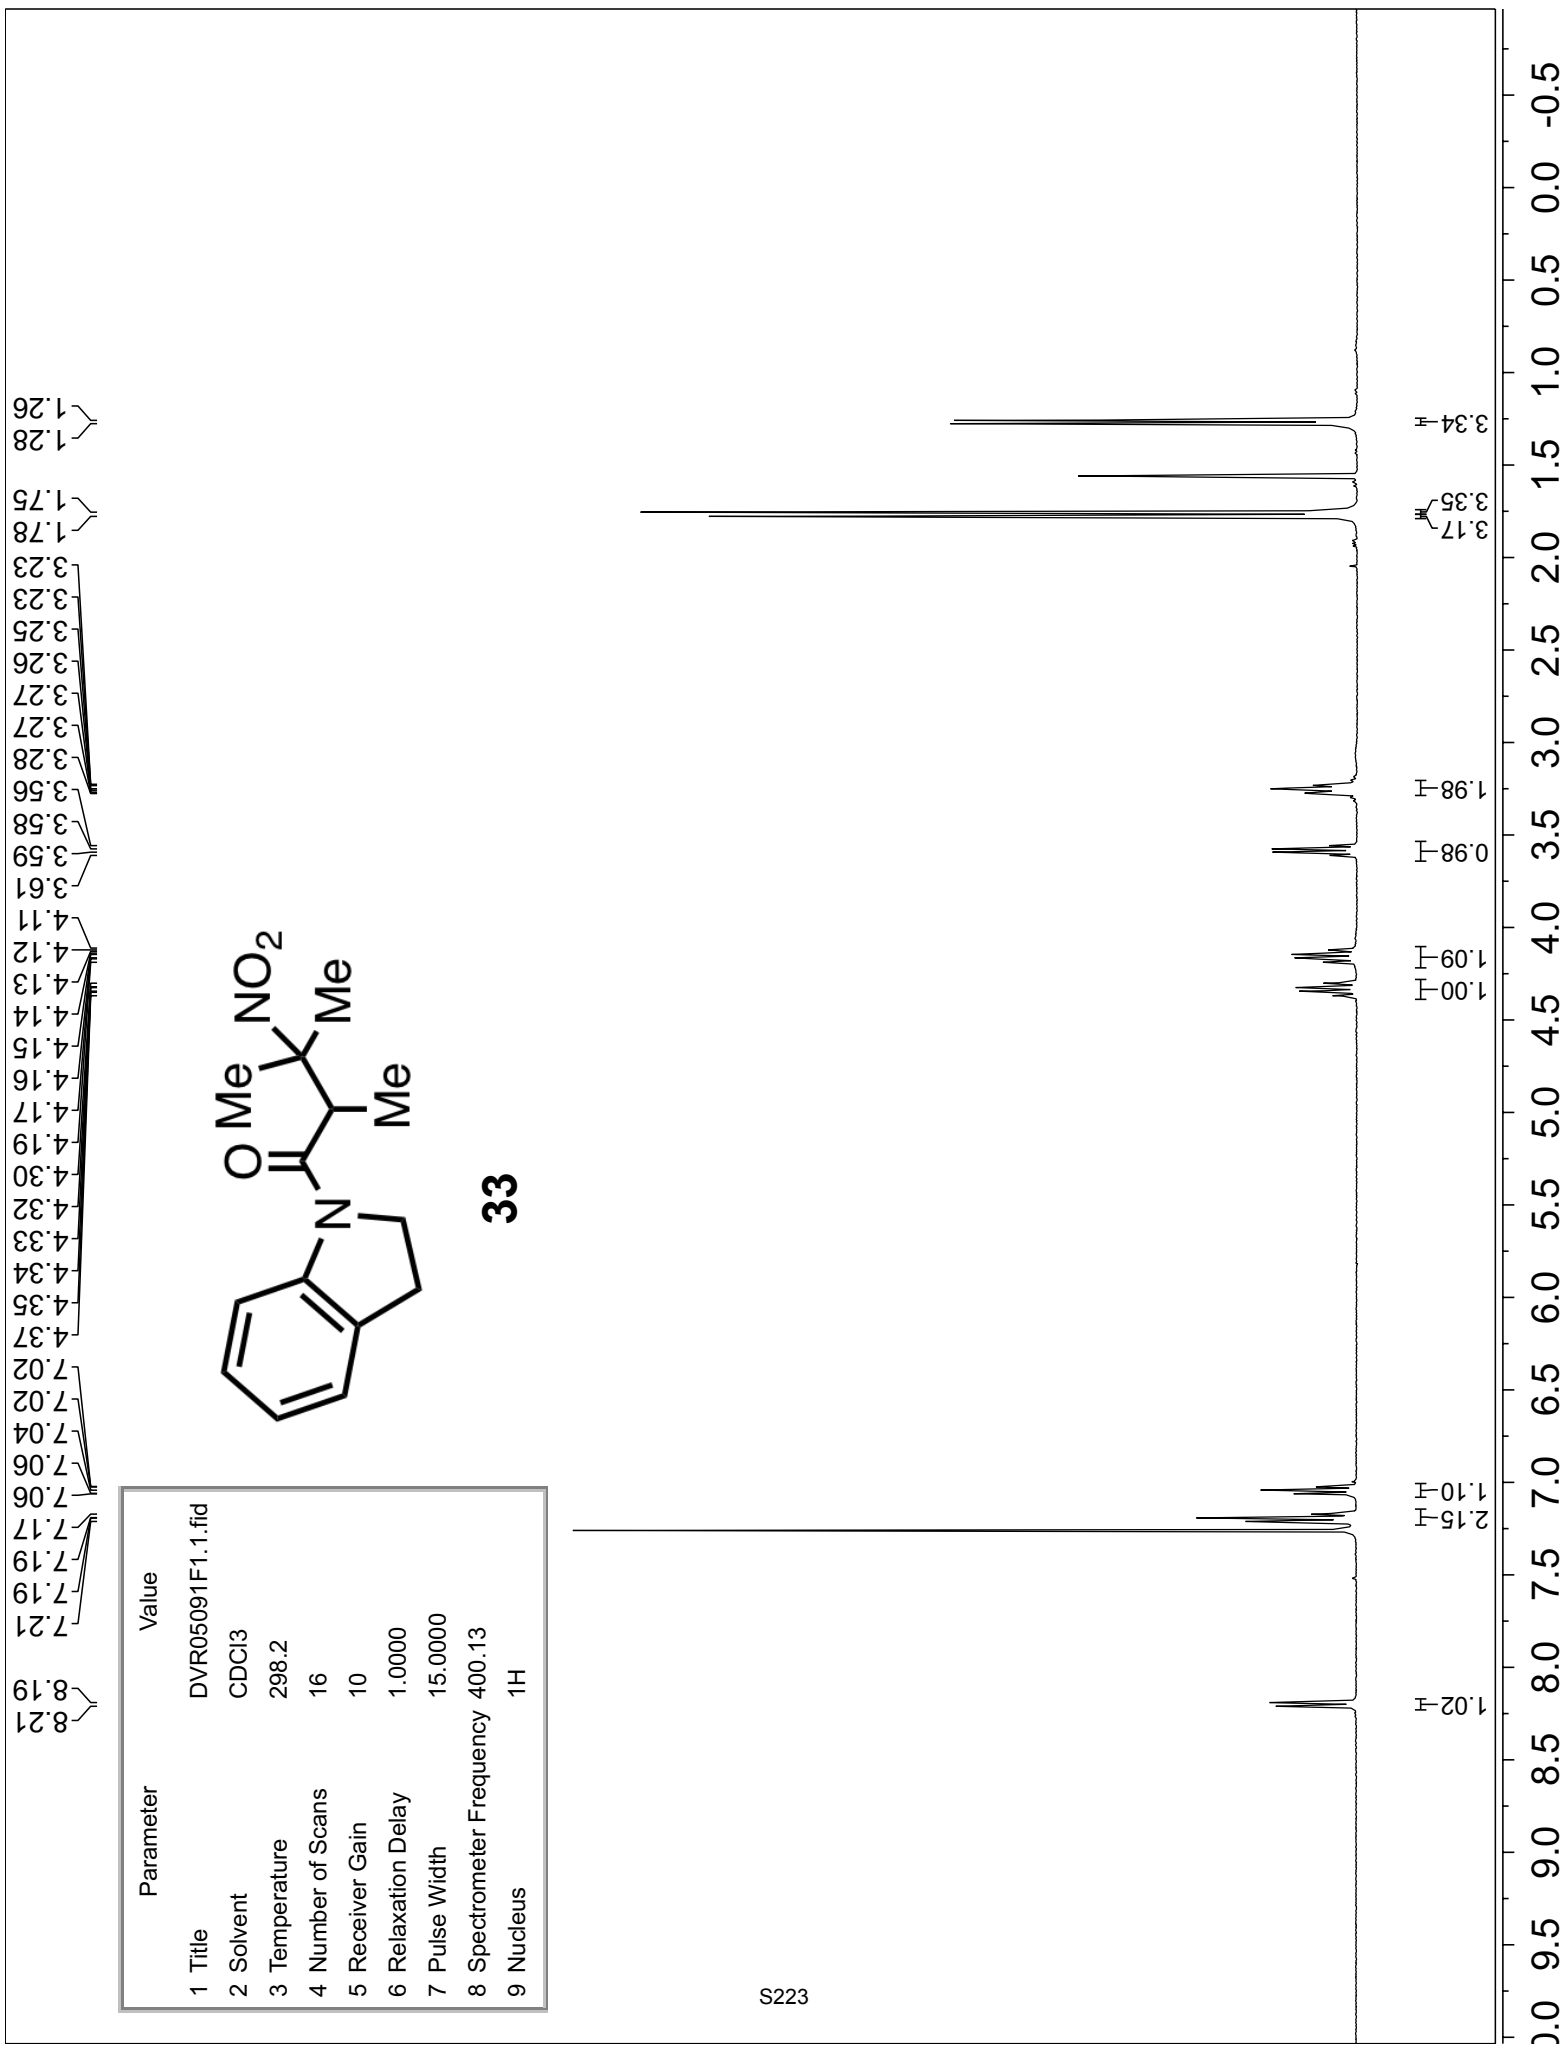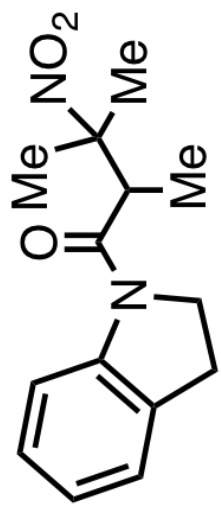

**33**

| Parameter                | Value             |
|--------------------------|-------------------|
| 1 Title                  | DVR05091F1.1.fid  |
| 2 Solvent                | CDCl <sub>3</sub> |
| 3 Temperature            | 298.2             |
| 4 Number of Scans        | 16                |
| 5 Receiver Gain          | 10                |
| 6 Relaxation Delay       | 1.0000            |
| 7 Pulse Width            | 15.0000           |
| 8 Spectrometer Frequency | 400.13            |
| 9 Nucleus                | <sup>1</sup> H    |

| Parameter                | Value               |
|--------------------------|---------------------|
| 1 Title                  | DVR05091F1C13.1.fid |
| 2 Solvent                | CDC13               |
| 3 Temperature            | 298.2               |
| 4 Number of Scans        | 1024                |
| 5 Receiver Gain          | 512                 |
| 6 Relaxation Delay       | 3.0000              |
| 7 Pulse Width            | 9.2500              |
| 8 Spectrometer Frequency | 100.62              |
| 9 Nucleus                | <sup>13</sup> C     |

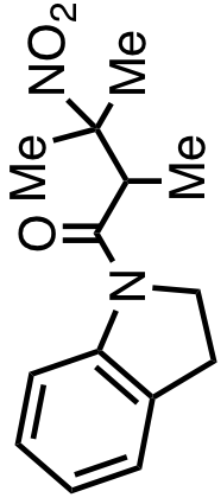

**33**

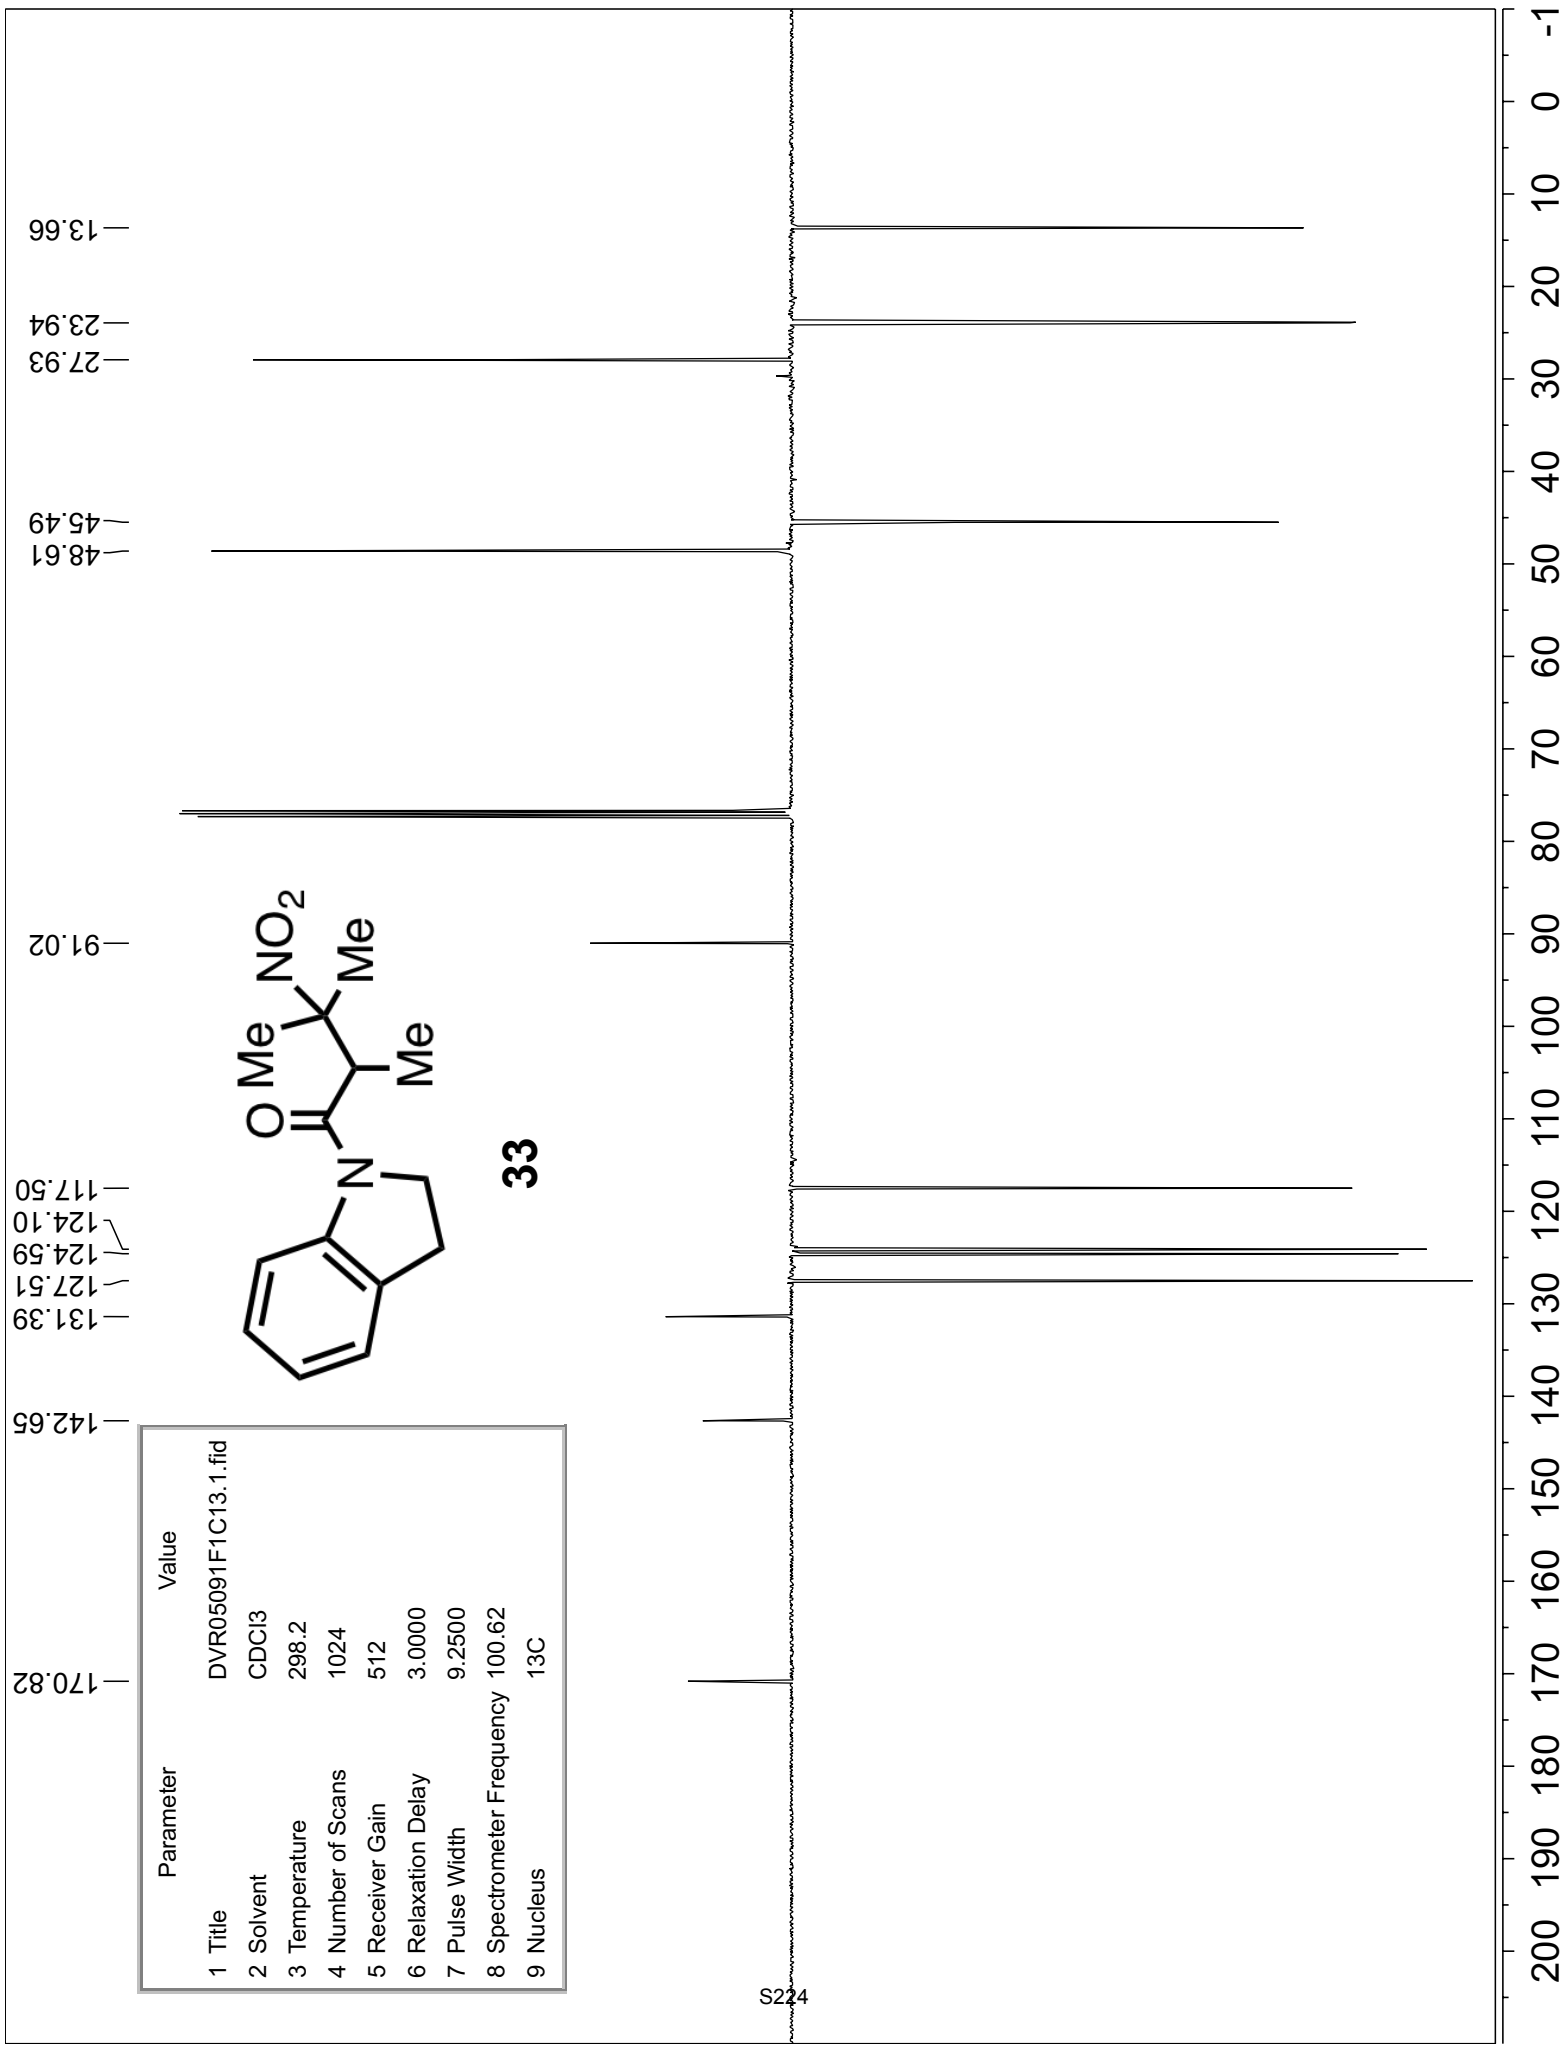

| Parameter                | Value            |
|--------------------------|------------------|
| 1 Title                  | DVR04232D2.1.fid |
| 2 Solvent                | CDCI3            |
| 3 Temperature            | 297.2            |
| 4 Number of Scans        | 16               |
| 5 Receiver Gain          | 228              |
| 6 Relaxation Delay       | 1.0000           |
| 7 Pulse Width            | 10.7700          |
| 8 Spectrometer Frequency | 600.32           |
| 9 Nucleus                | <sup>1</sup> H   |

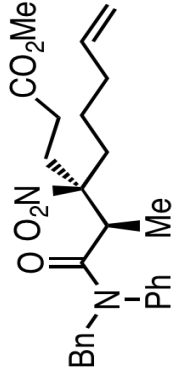

**34**

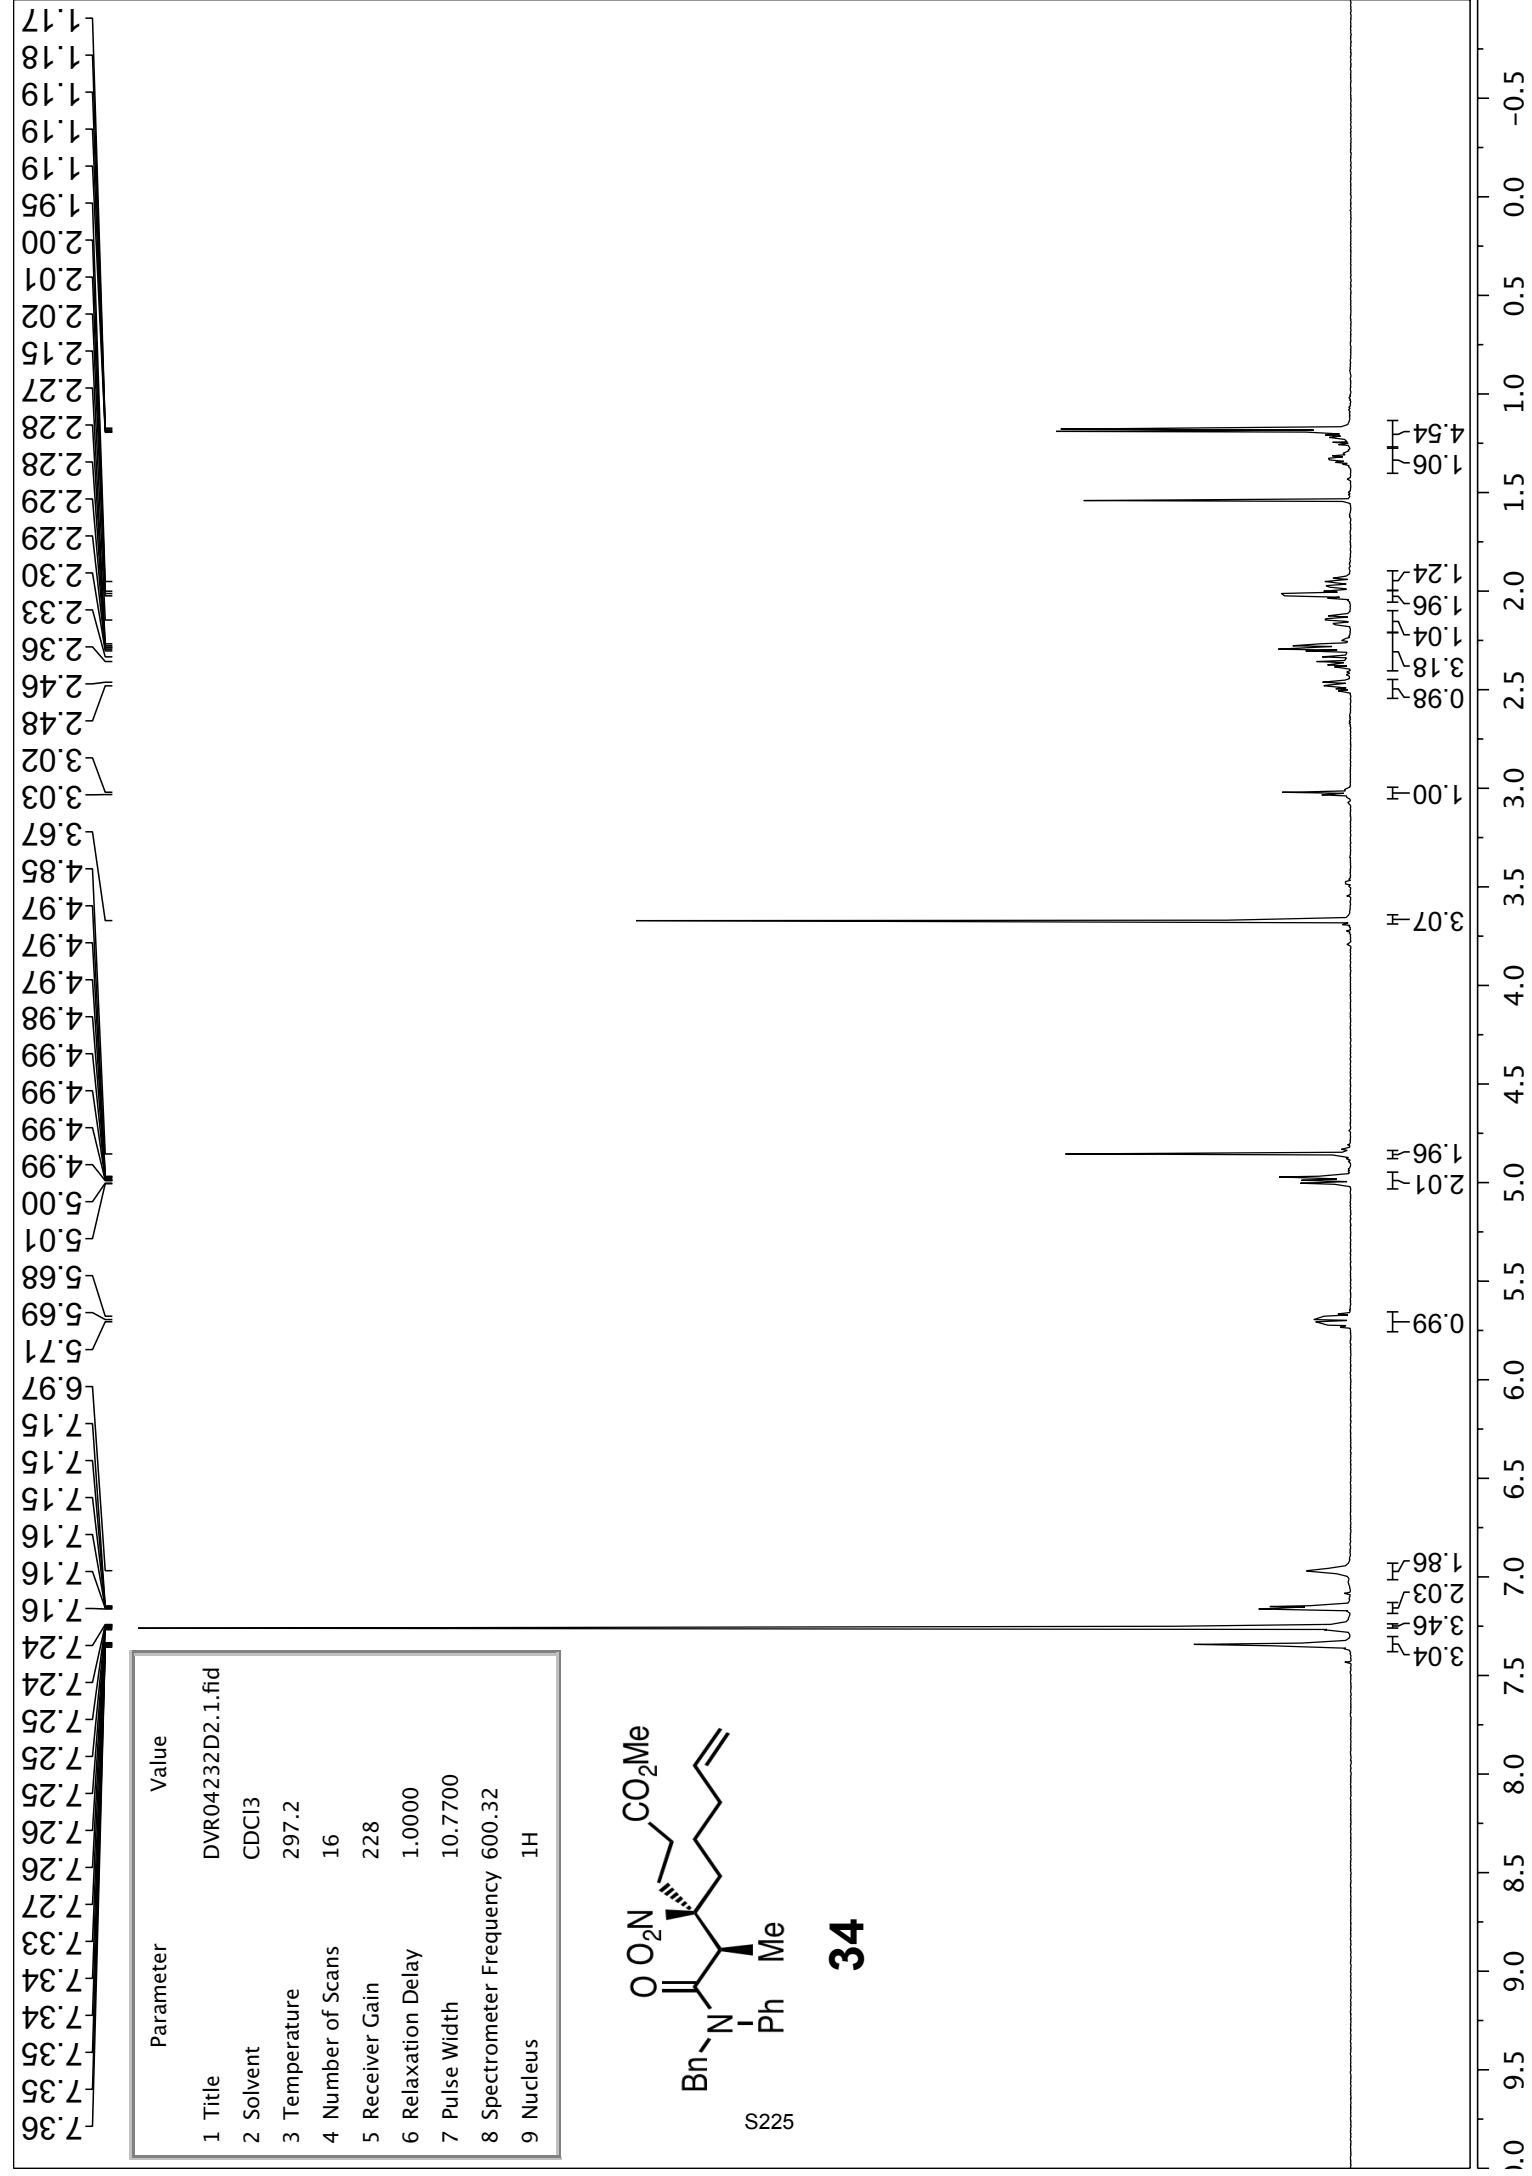

| Parameter                | Value           |
|--------------------------|-----------------|
| 1 Title                  | DVR04232.2.fid  |
| 2 Solvent                | CDCl3           |
| 3 Temperature            | 299.0           |
| 4 Number of Scans        | 1024            |
| 5 Receiver Gain          | 2050            |
| 6 Relaxation Delay       | 5.0000          |
| 7 Pulse Width            | 10.6300         |
| 8 Spectrometer Frequency | 150.97          |
| 9 Nucleus                | <sup>13</sup> C |

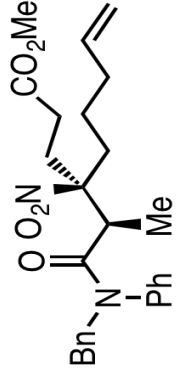

**34**

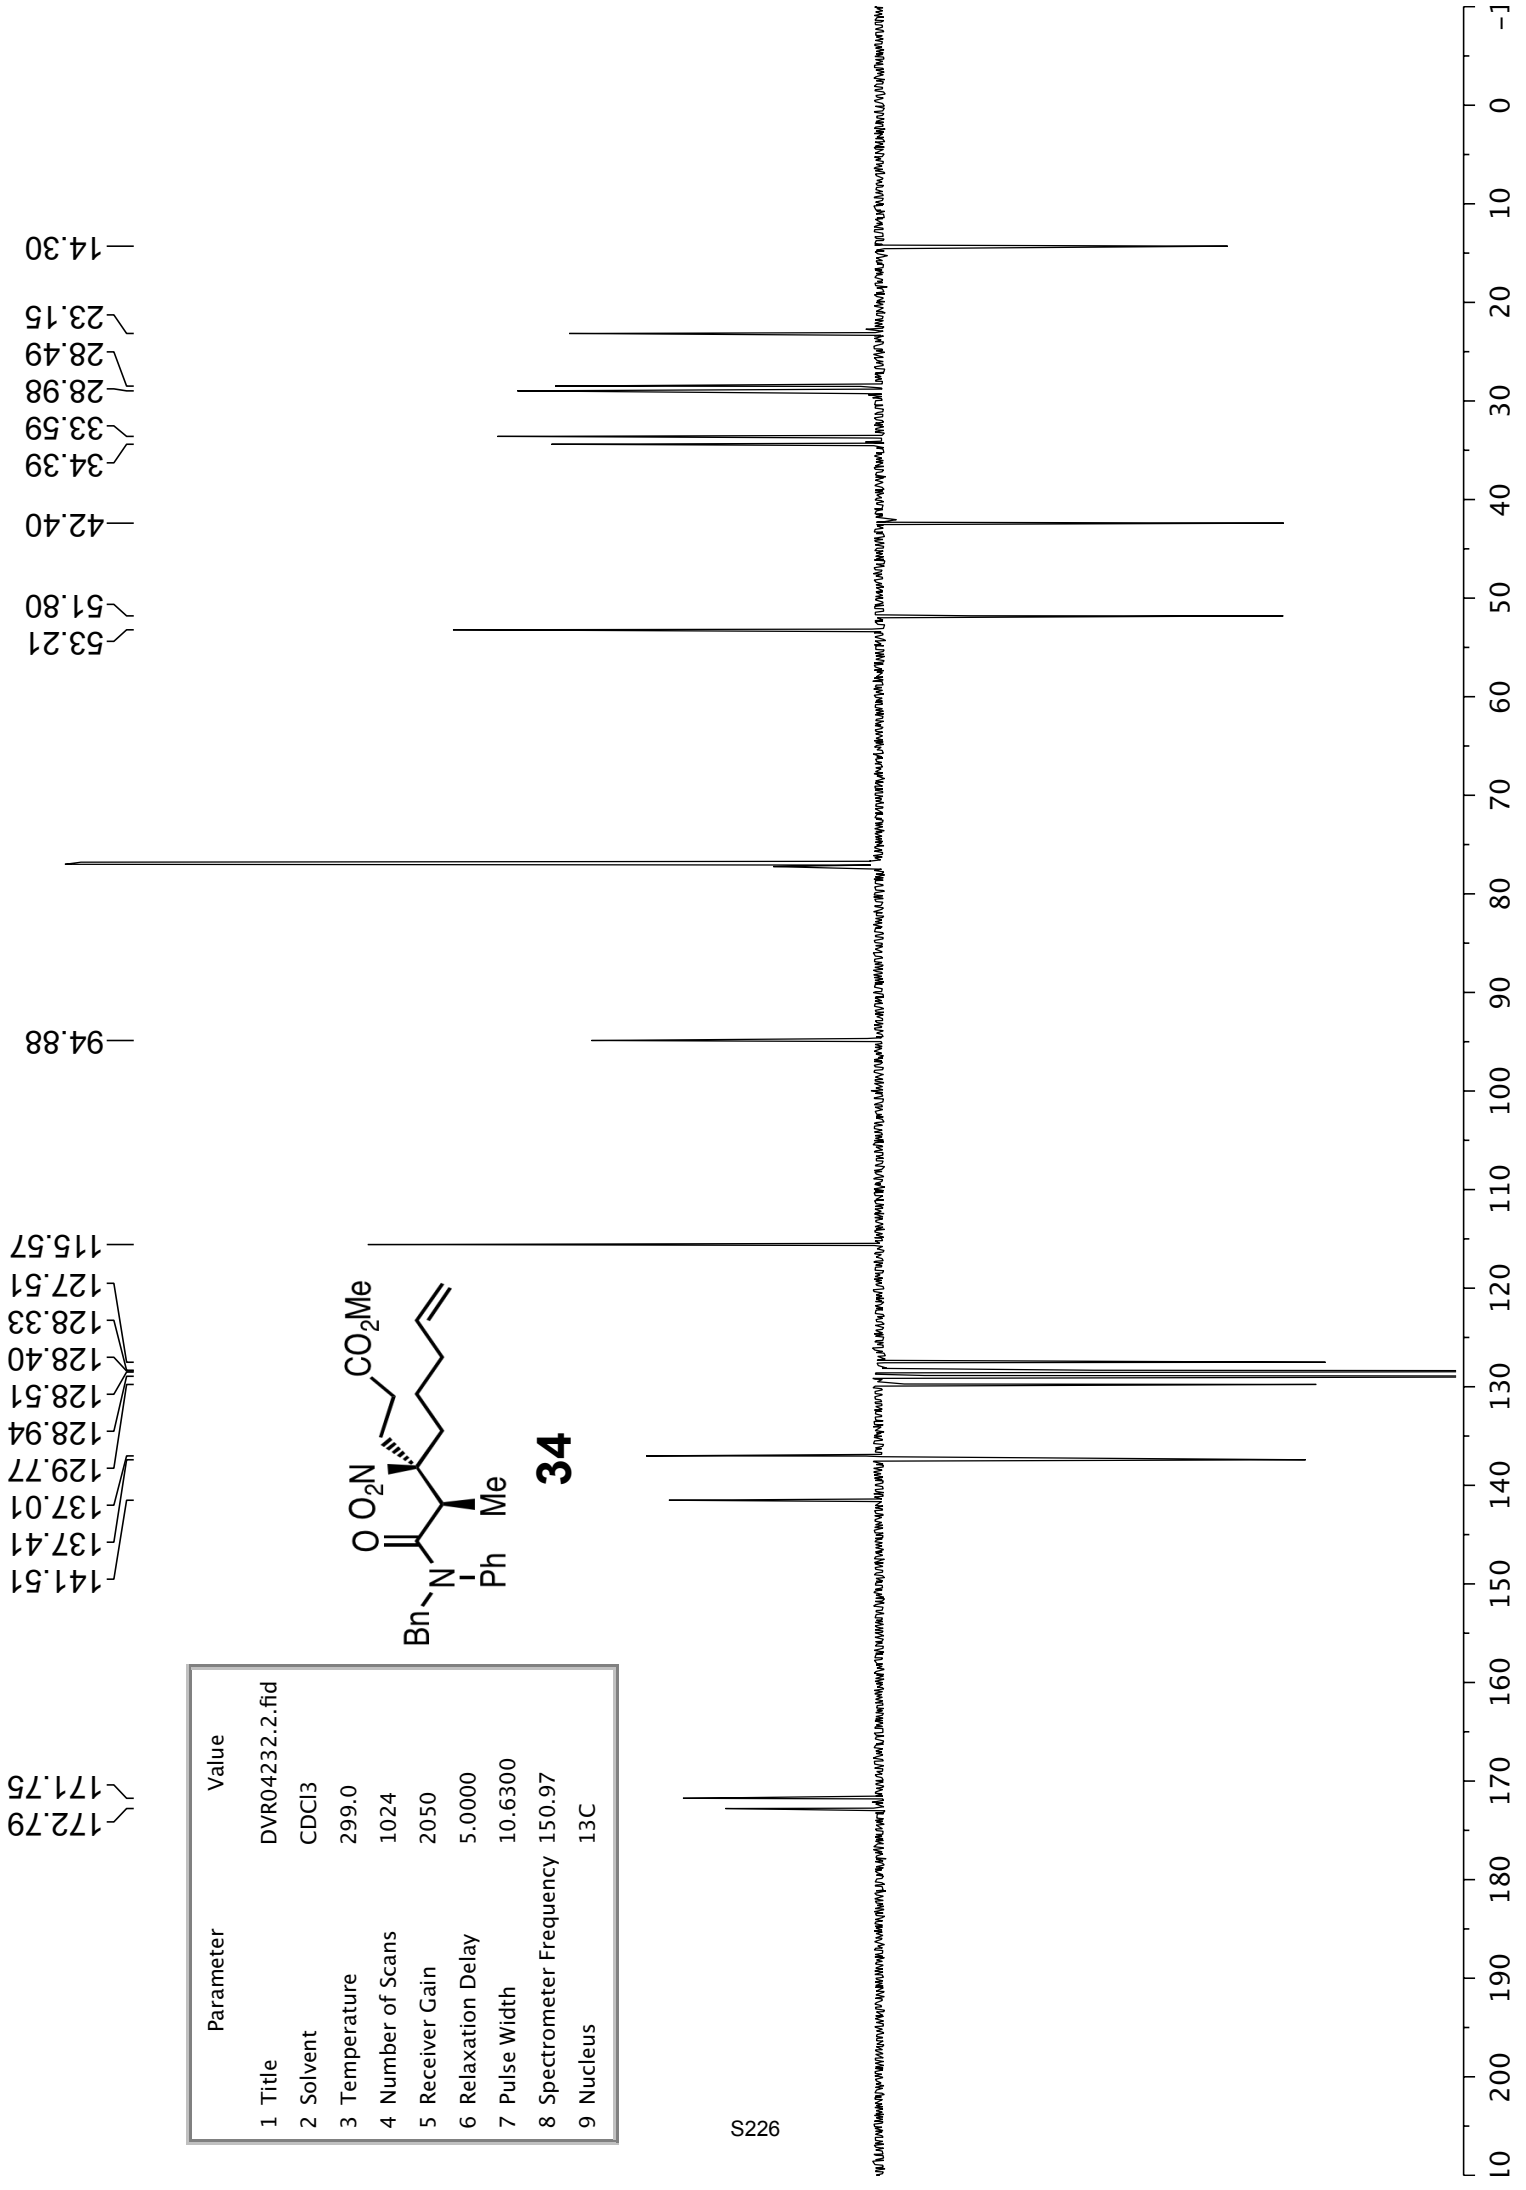



| Parameter                | Value            |
|--------------------------|------------------|
| 1 Title                  | DVR04265D1.1.fid |
| 2 Solvent                | CDCl3            |
| 3 Temperature            | 297.9            |
| 4 Number of Scans        | 16               |
| 5 Receiver Gain          | 181              |
| 6 Relaxation Delay       | 1.0000           |
| 7 Pulse Width            | 10.7700          |
| 8 Spectrometer Frequency | 600.32           |
| 9 Nucleus                | <sup>1</sup> H   |

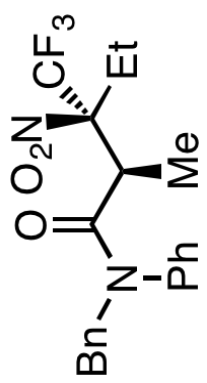

**35**

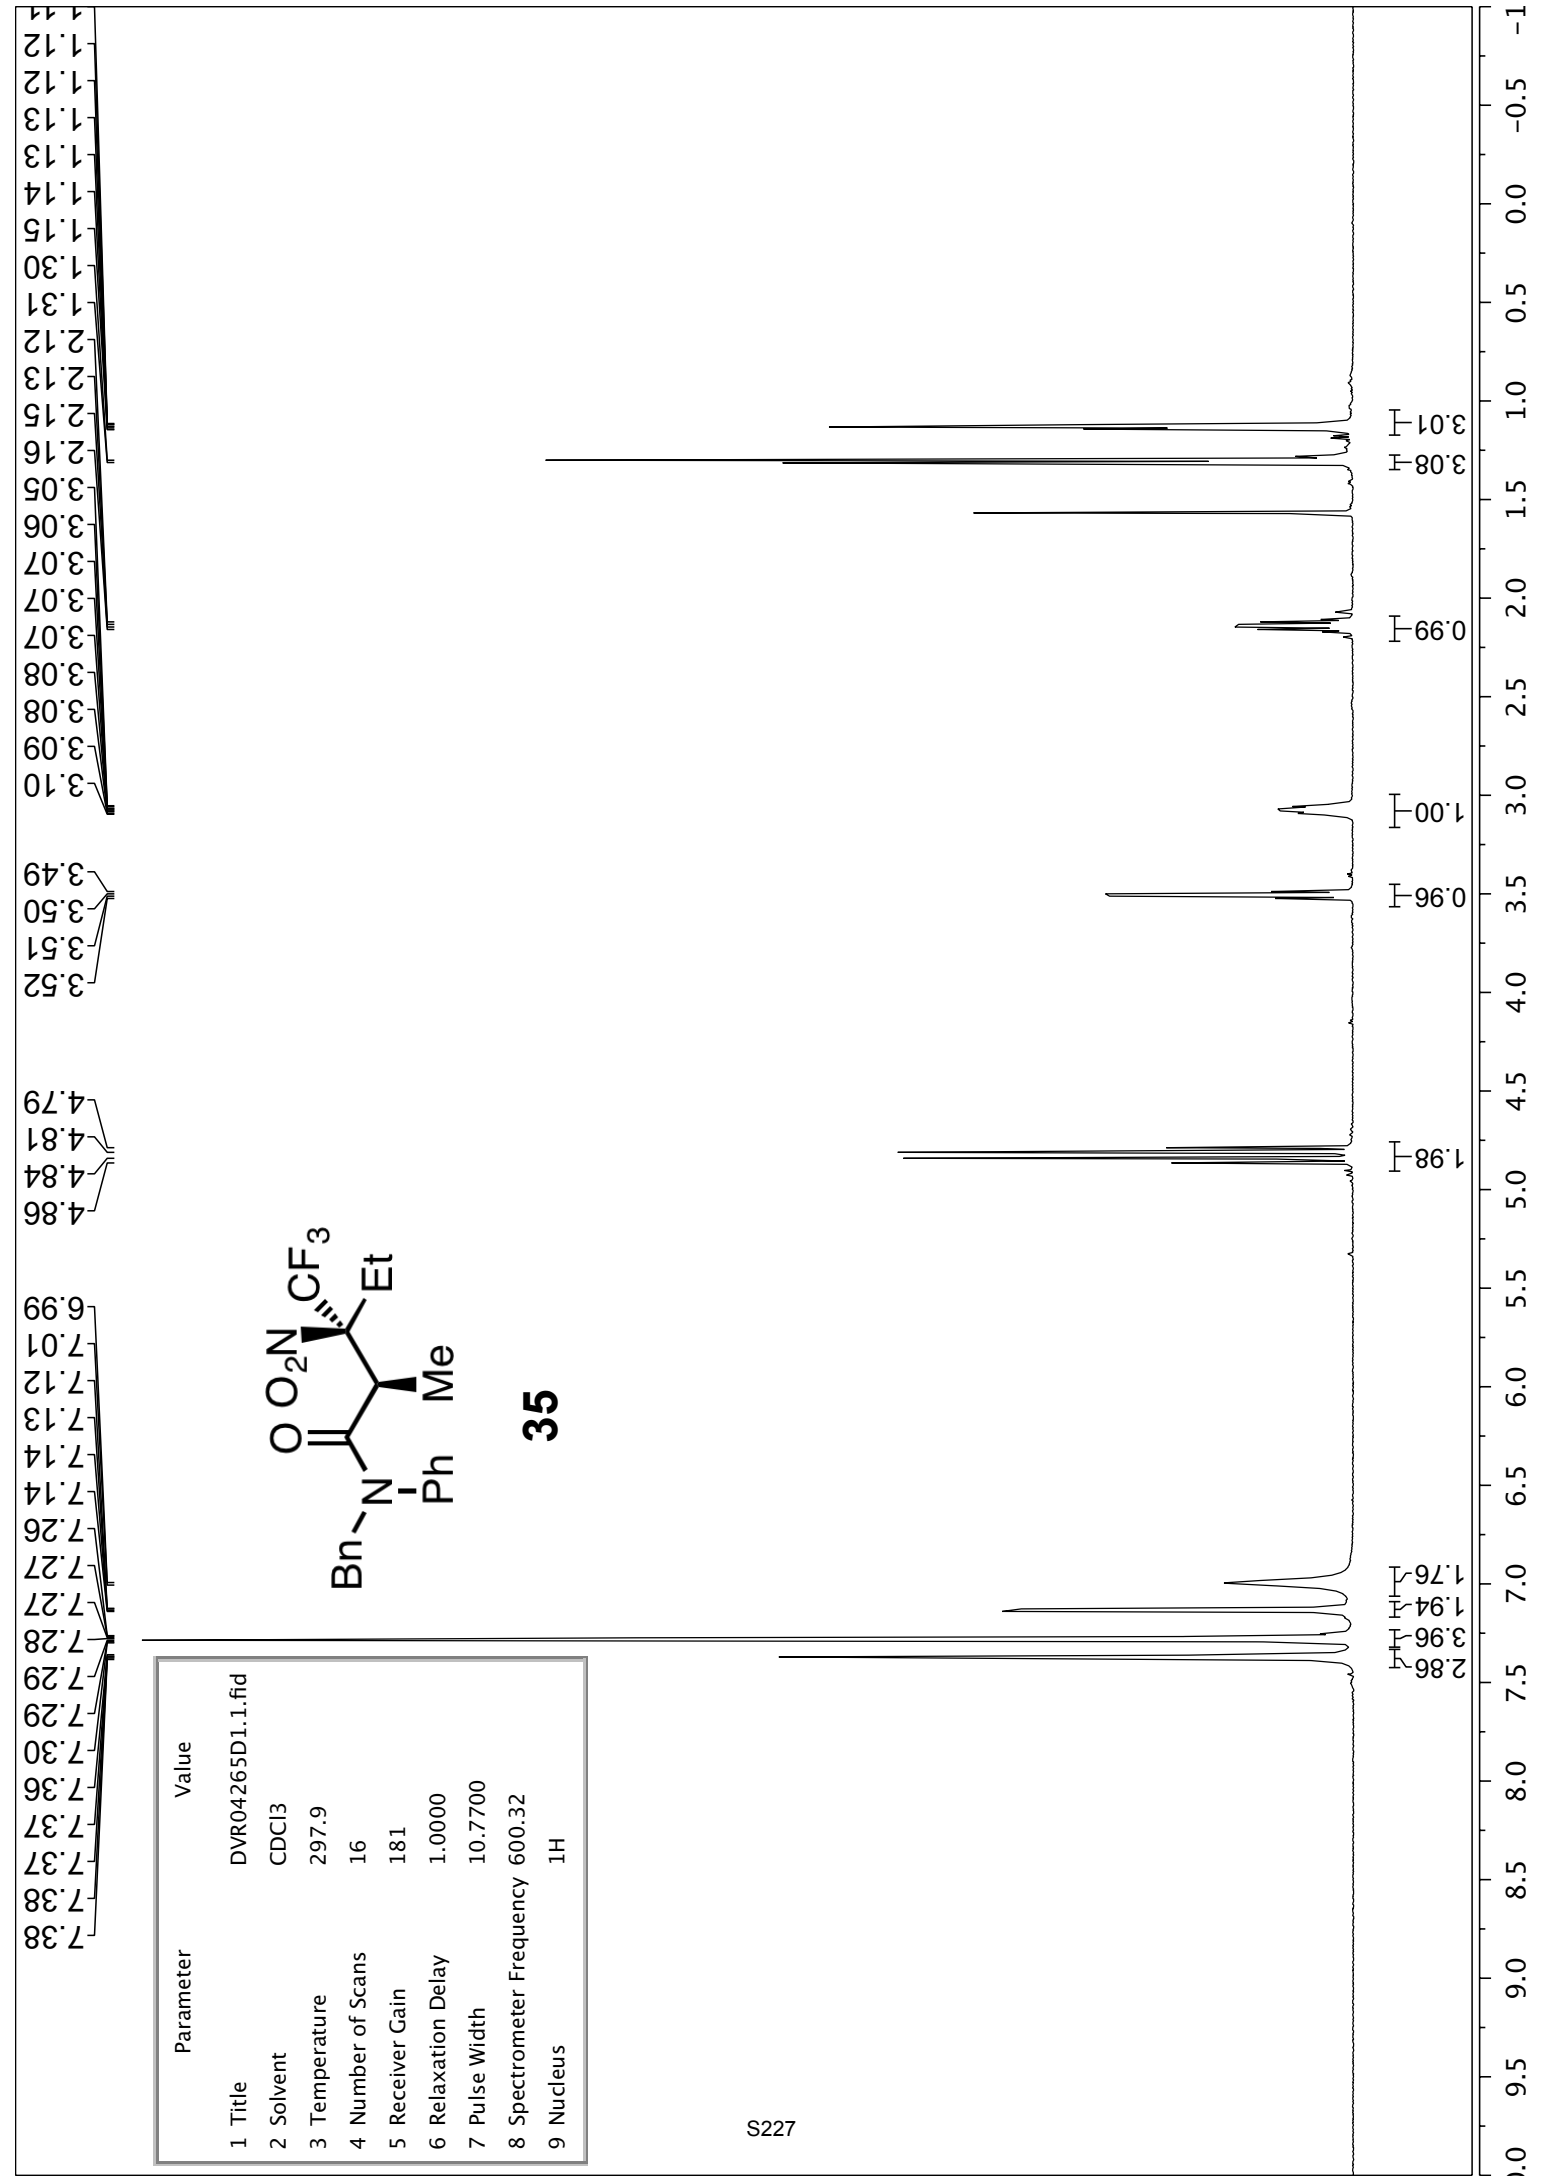

Parameter Value

|                          |                  |
|--------------------------|------------------|
| 1 Title                  | DVR04265D1.2.fid |
| 2 Solvent                | CDCl3            |
| 3 Temperature            | 297.9            |
| 4 Number of Scans        | 16               |
| 5 Receiver Gain          | 362              |
| 6 Relaxation Delay       | 3.0000           |
| 7 Pulse Width            | 11.6200          |
| 8 Spectrometer Frequency | 564.81           |
| 9 Nucleus                | 19F              |

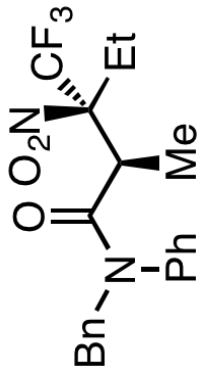

**35**

-67.20

-5 -10 -15 -20 -25 -30 -35 -40 -45 -50 -55 -60 -65 -70 -75 -80 -85 -90 -95 -1

| Parameter                | Value               |
|--------------------------|---------------------|
| 1 Title                  | DVR04265D1C13.1.fid |
| 2 Solvent                | CDCl3               |
| 3 Temperature            | 298.1               |
| 4 Number of Scans        | 1024                |
| 5 Receiver Gain          | 512                 |
| 6 Relaxation Delay       | 3.0000              |
| 7 Pulse Width            | 9.2500              |
| 8 Spectrometer Frequency | 100.62              |
| 9 Nucleus                | <sup>13</sup> C     |

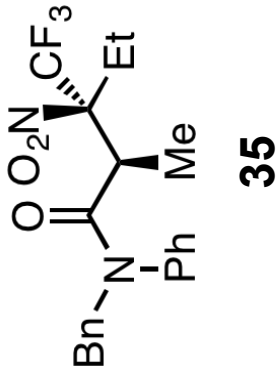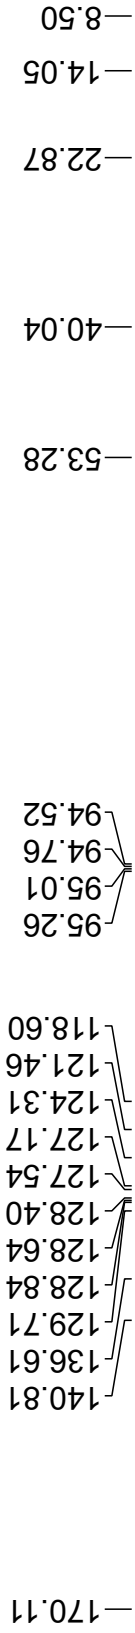

6225

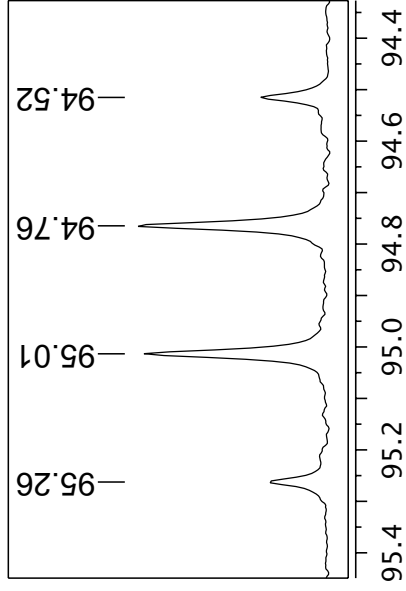

| Parameter                | Value            |
|--------------------------|------------------|
| 1 Title                  | DVR05004d1.1.fid |
| 2 Solvent                | CDCl3            |
| 3 Temperature            | 298.0            |
| 4 Number of Scans        | 16               |
| 5 Receiver Gain          | 203              |
| 6 Relaxation Delay       | 1.0000           |
| 7 Pulse Width            | 10.7700          |
| 8 Spectrometer Frequency | 600.32           |
| 9 Nucleus                | <sup>1</sup> H   |

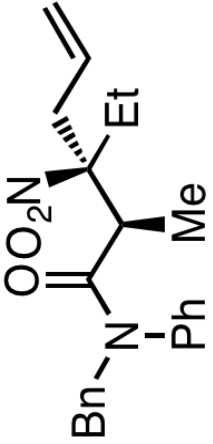

**36**

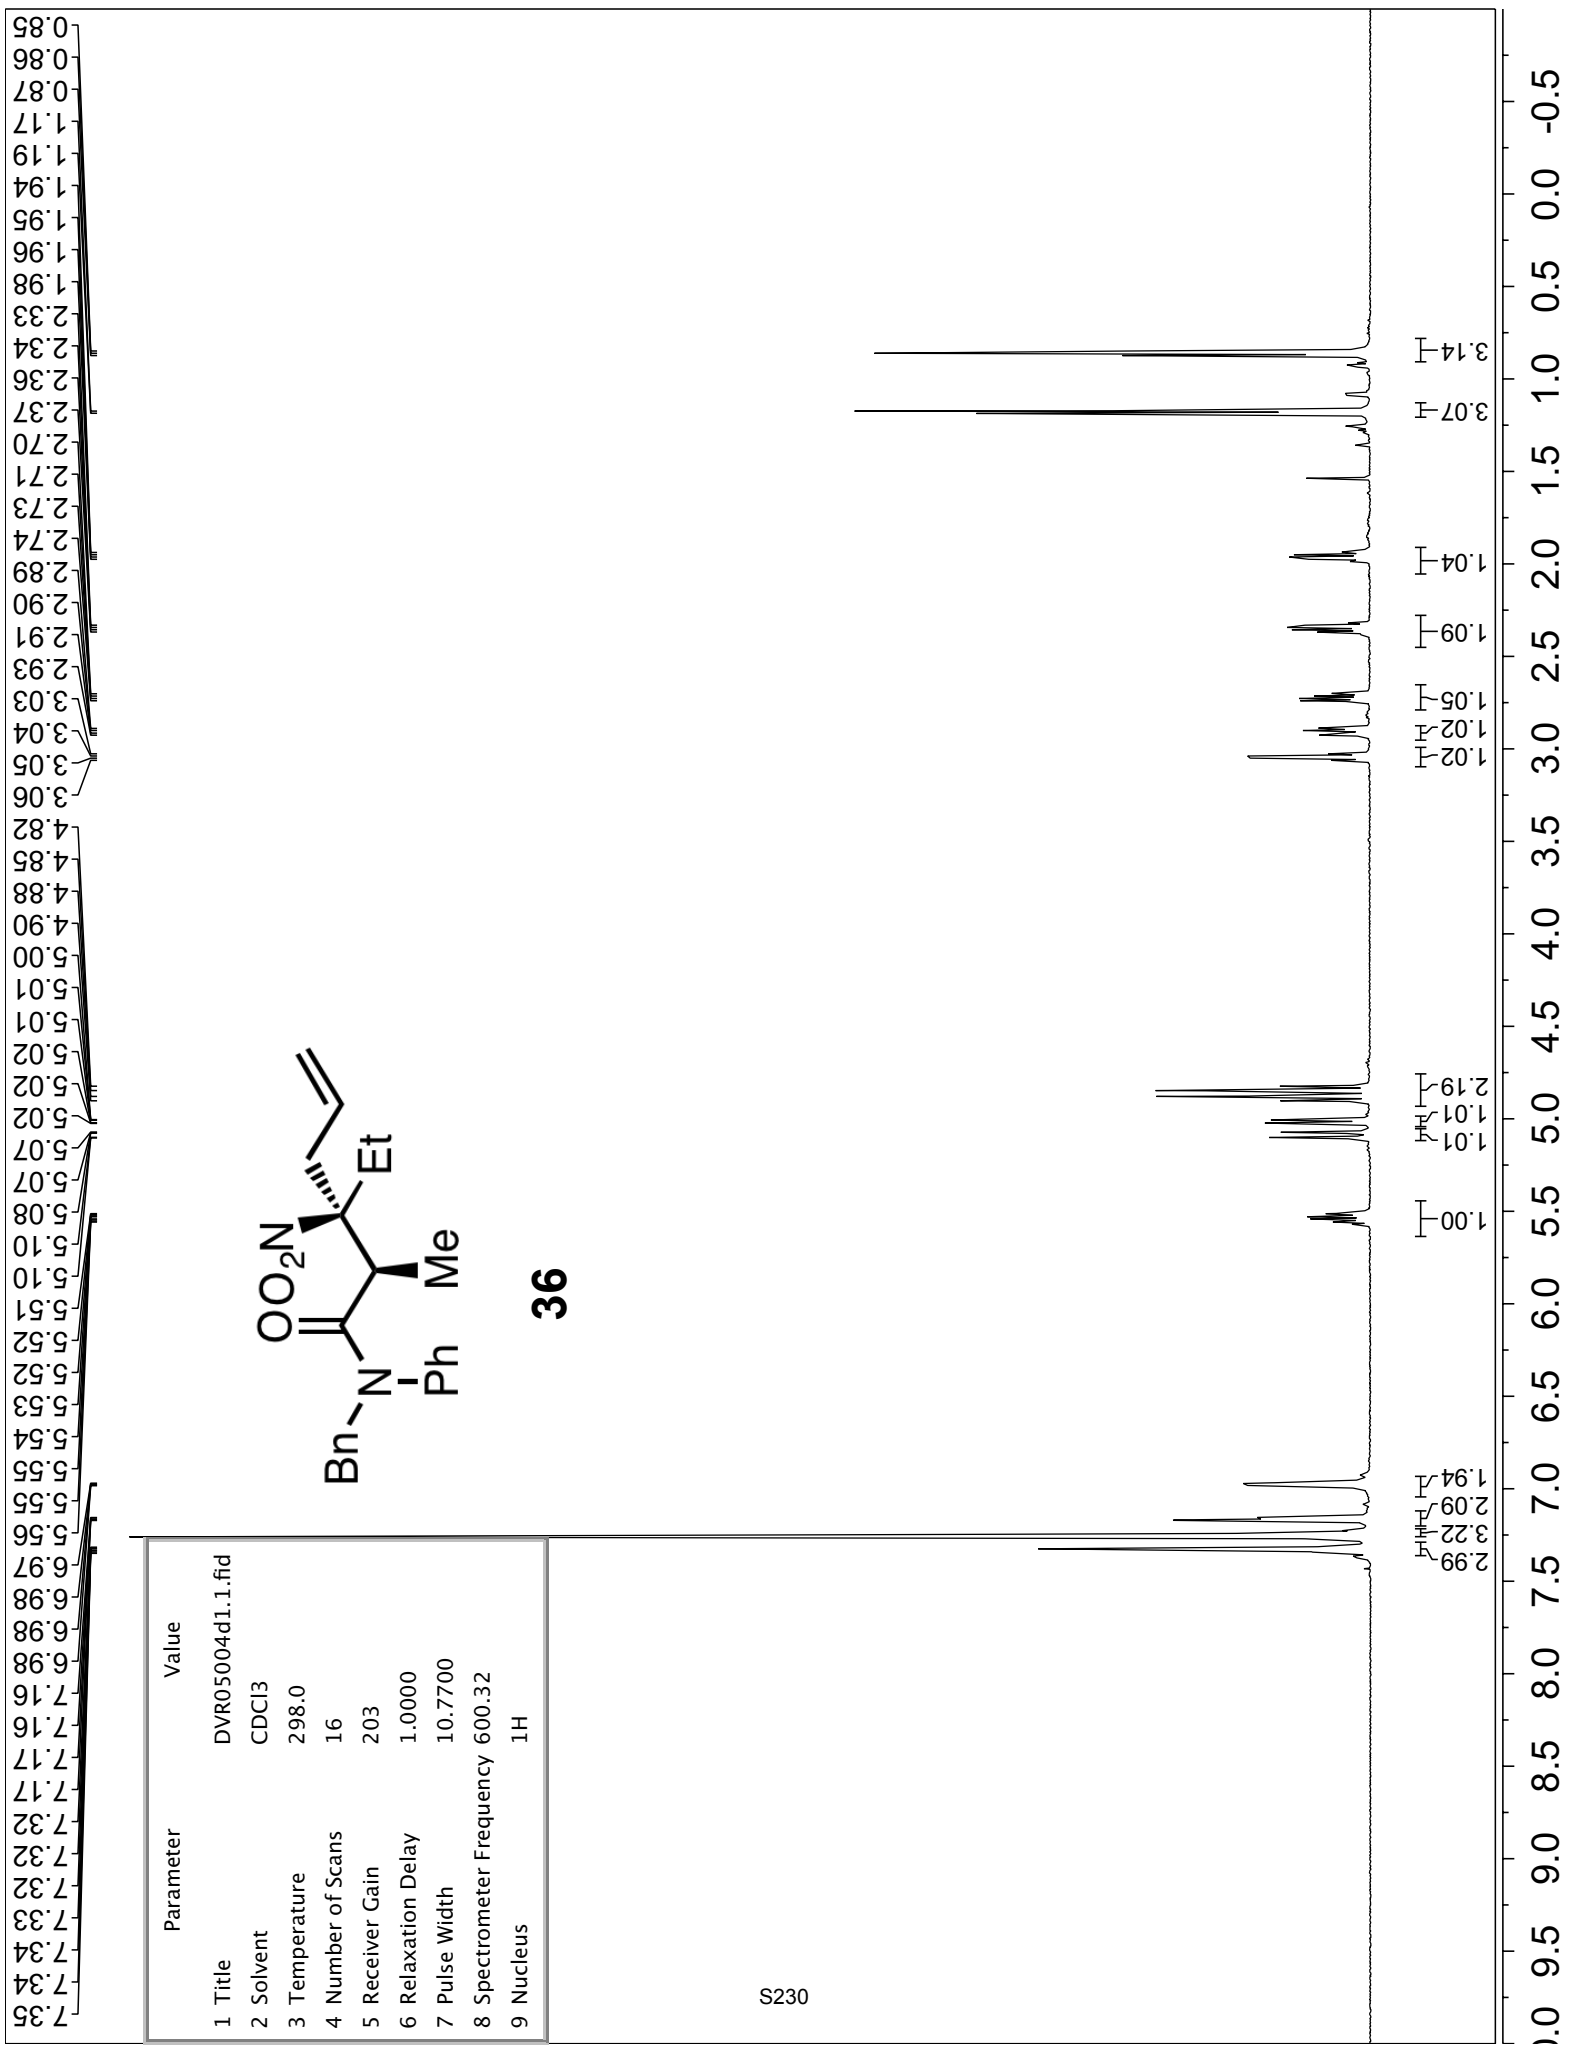

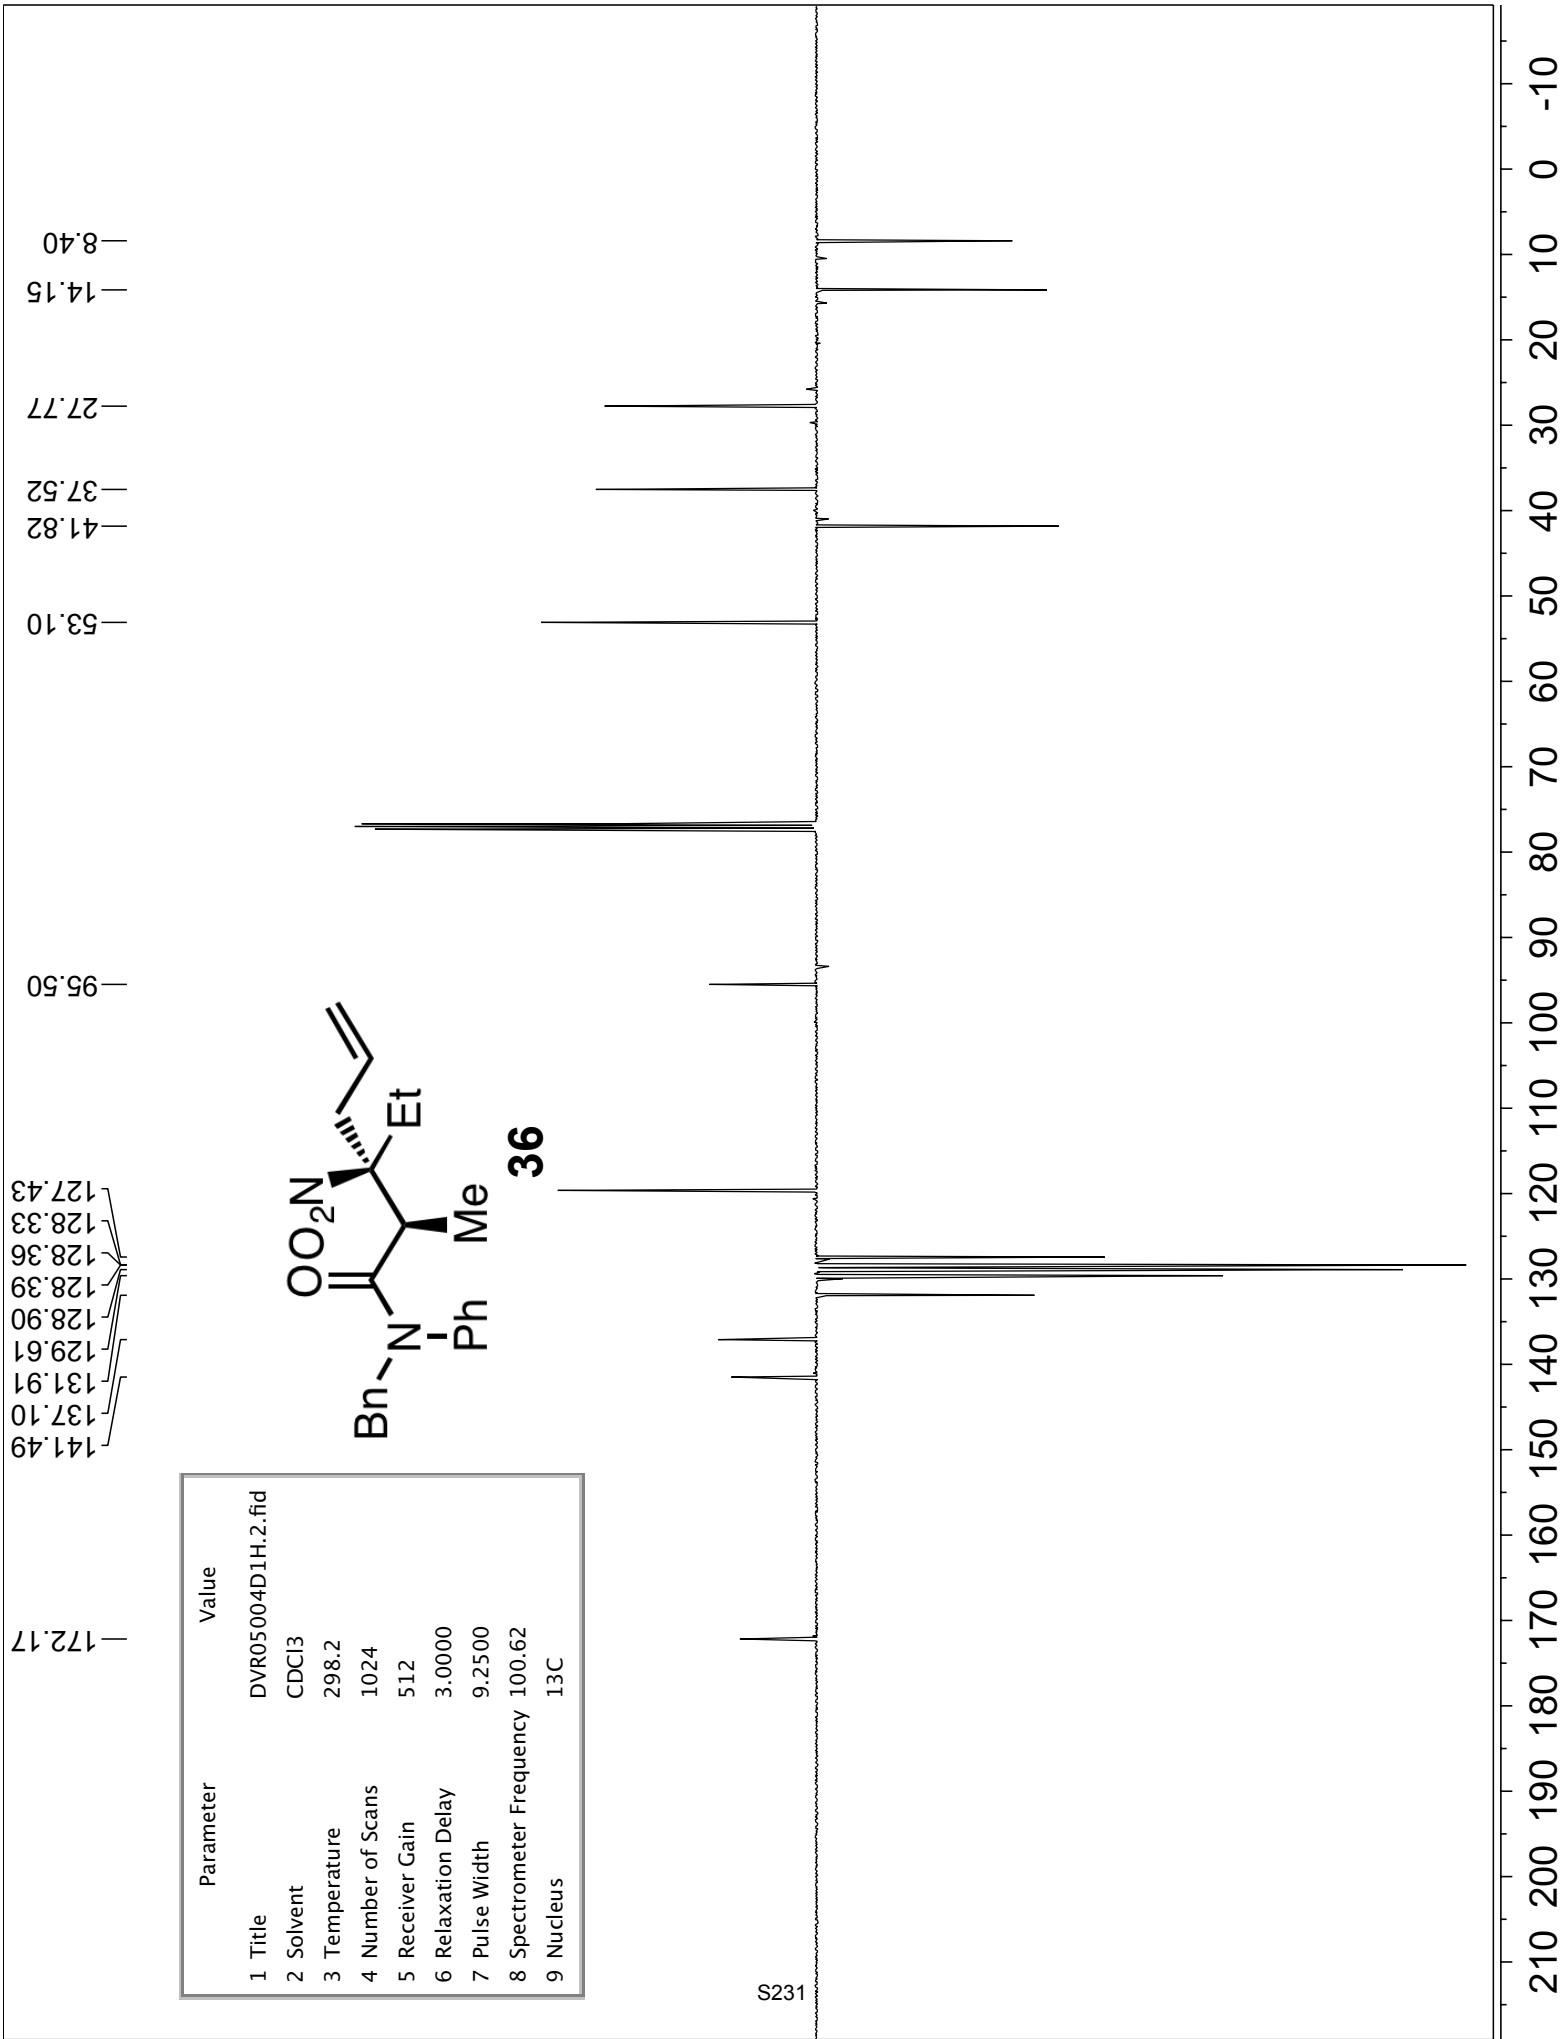

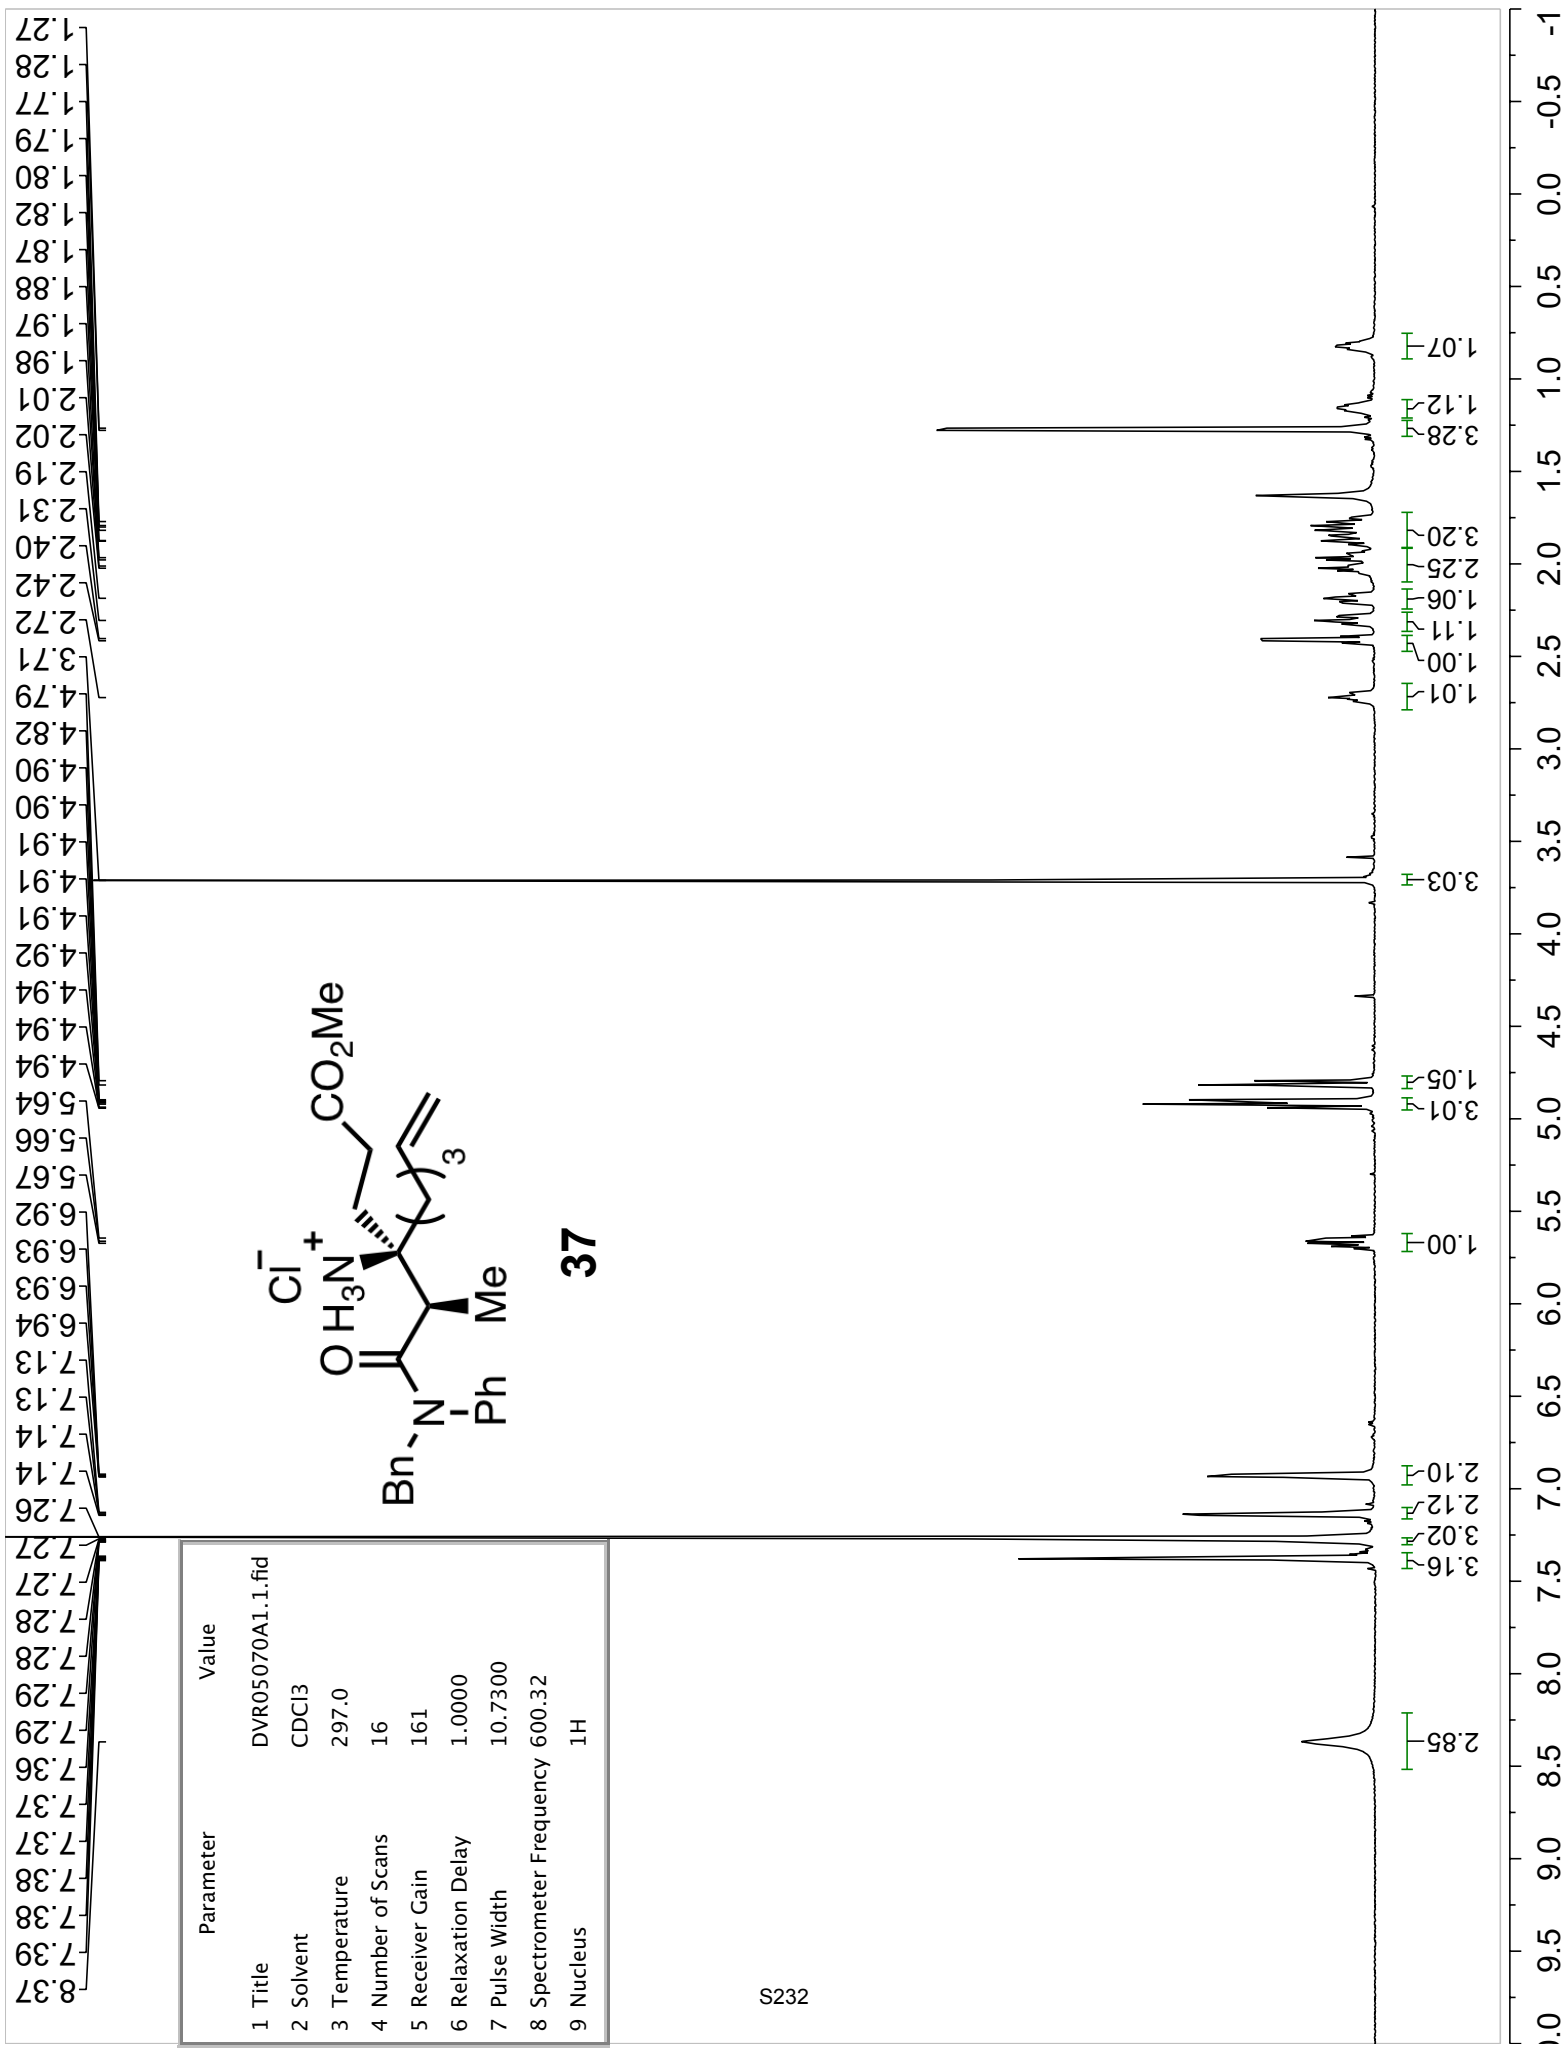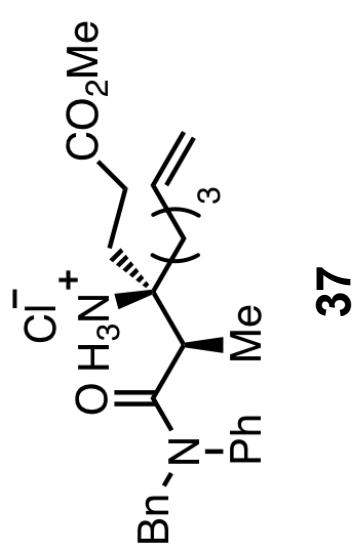

| Parameter                | Value            |
|--------------------------|------------------|
| 1 Title                  | DVR05070A1.1.fid |
| 2 Solvent                | CDCl3            |
| 3 Temperature            | 297.0            |
| 4 Number of Scans        | 16               |
| 5 Receiver Gain          | 161              |
| 6 Relaxation Delay       | 1.0000           |
| 7 Pulse Width            | 10.7300          |
| 8 Spectrometer Frequency | 600.32           |
| 9 Nucleus                | <sup>1</sup> H   |



| Parameter                | Value            |
|--------------------------|------------------|
| 1 Title                  | DVR04296D1.1.fid |
| 2 Solvent                | CDCl3            |
| 3 Temperature            | 298.0            |
| 4 Number of Scans        | 16               |
| 5 Receiver Gain          | 161              |
| 6 Relaxation Delay       | 1.0000           |
| 7 Pulse Width            | 10.7700          |
| 8 Spectrometer Frequency | 600.32           |
| 9 Nucleus                | <sup>1</sup> H   |

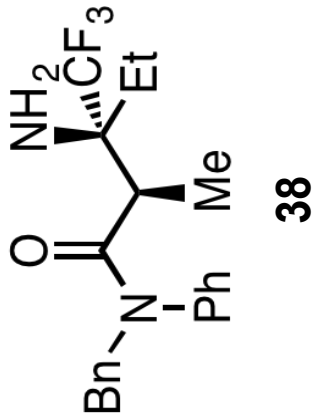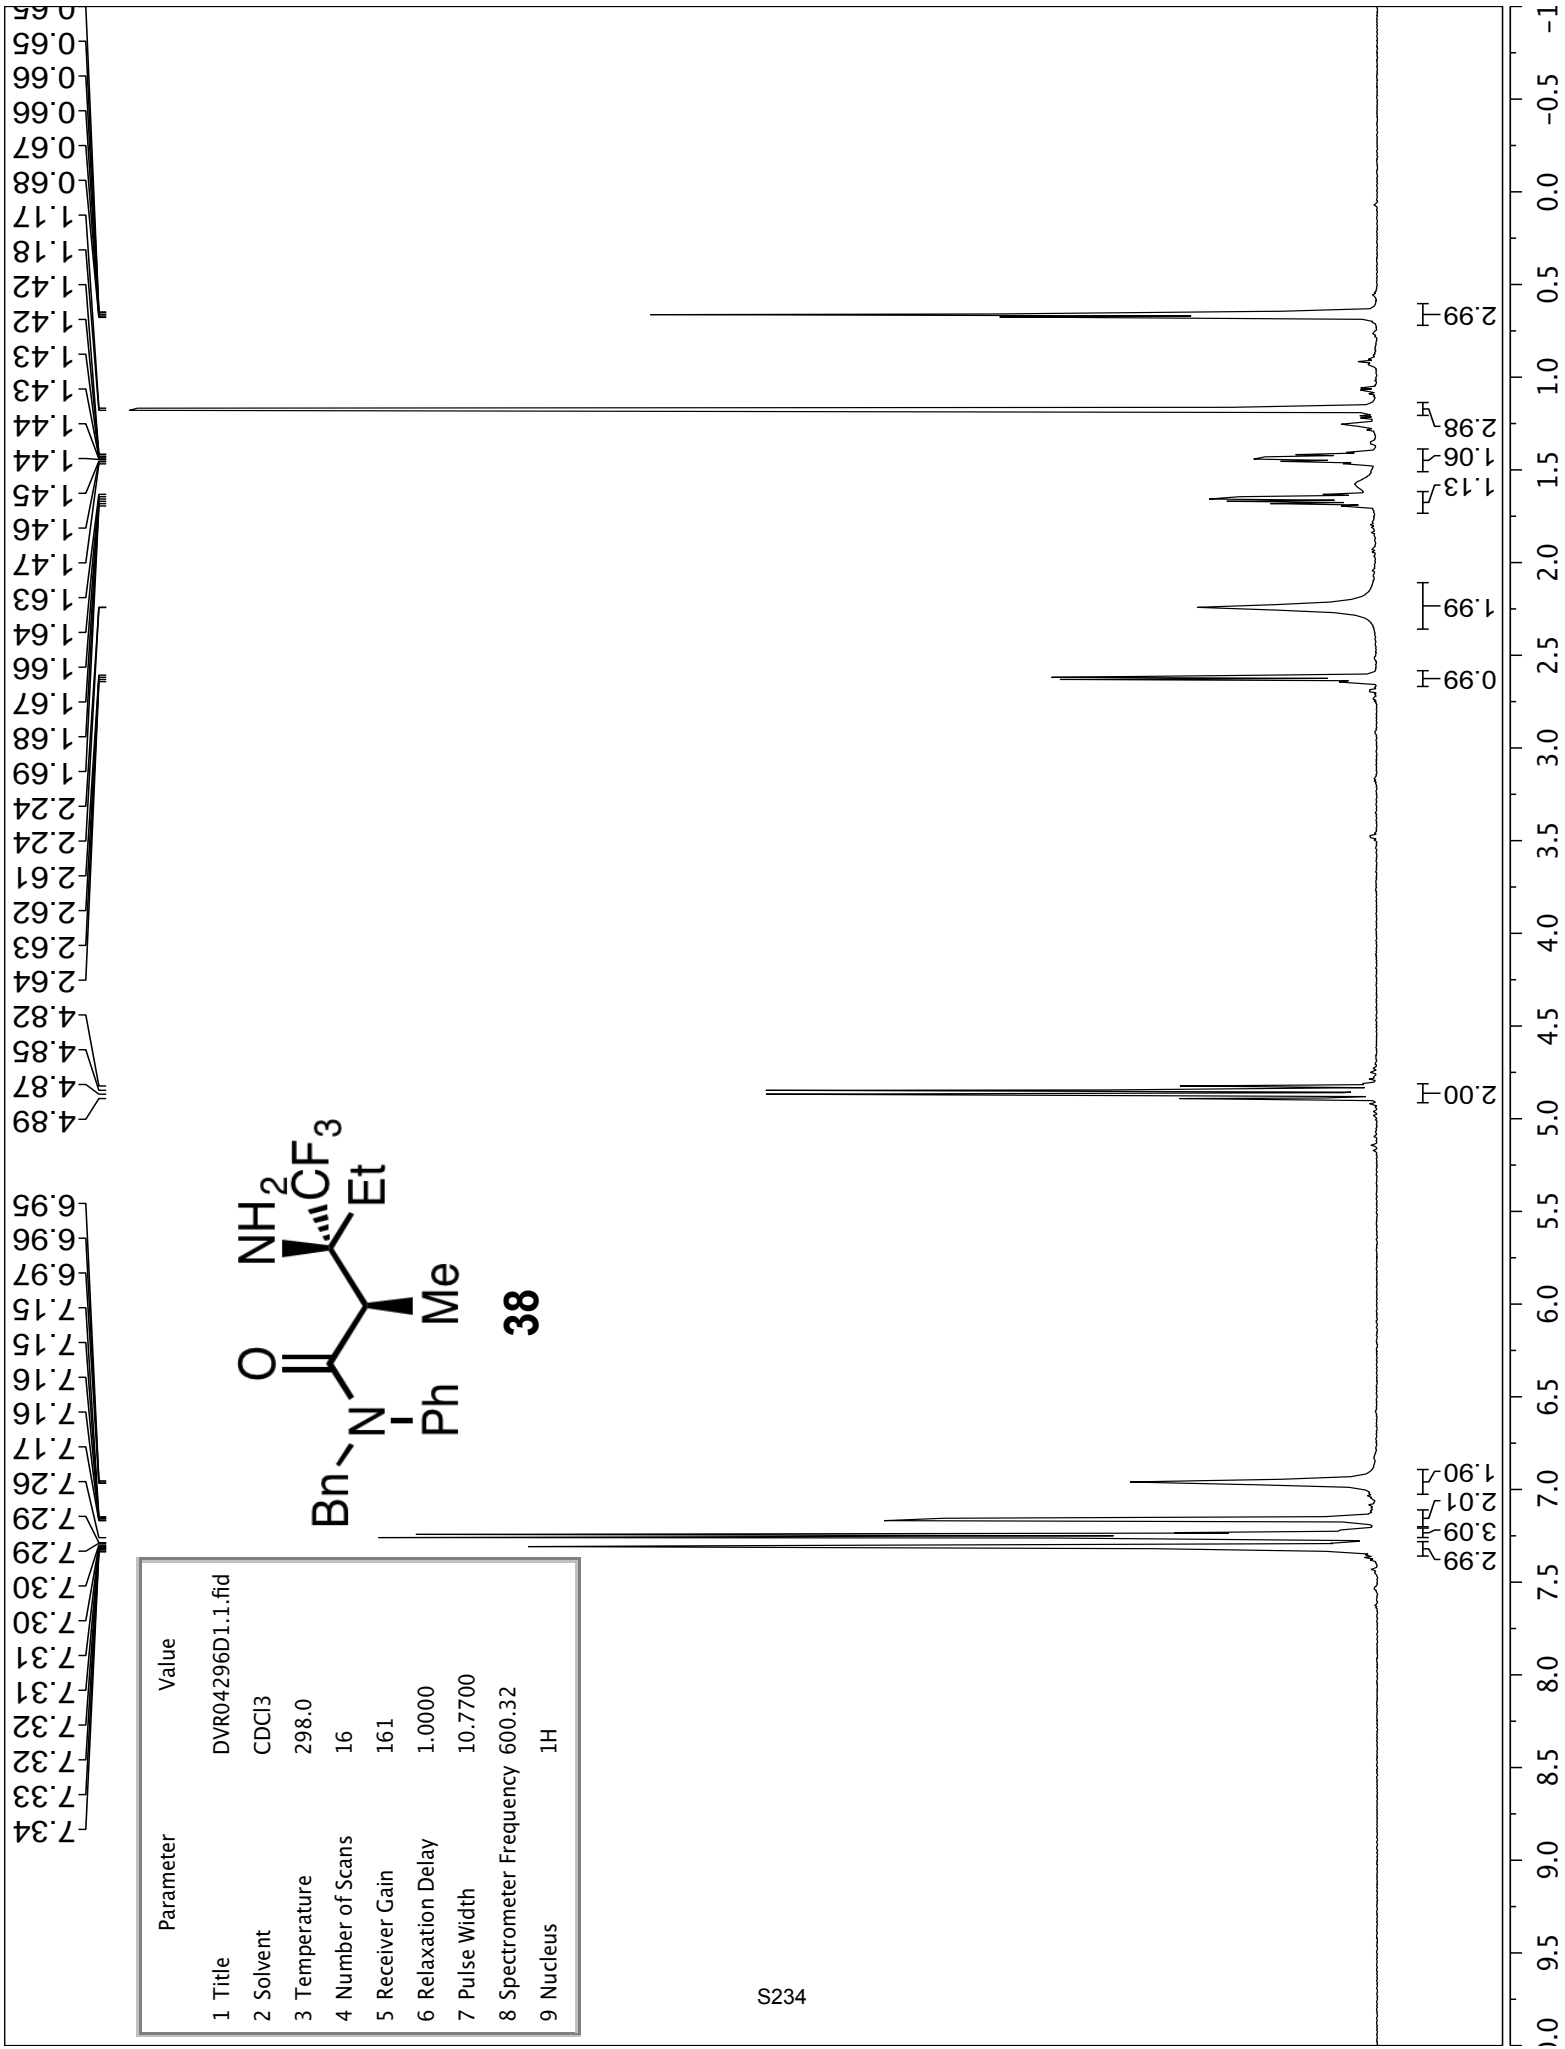



| Parameter                | Value            |
|--------------------------|------------------|
| 1 Title                  | DVR04296D1.2.fid |
| 2 Solvent                | CDCl3            |
| 3 Temperature            | 298.0            |
| 4 Number of Scans        | 16               |
| 5 Receiver Gain          | 362              |
| 6 Relaxation Delay       | 3.0000           |
| 7 Pulse Width            | 11.6200          |
| 8 Spectrometer Frequency | 564.81           |
| 9 Nucleus                | 19F              |

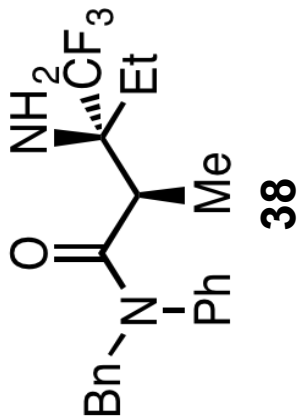

-74.47

-5 -10 -15 -20 -25 -30 -35 -40 -45 -50 -55 -60 -65 -70 -75 -80 -85 -90 -95 -1

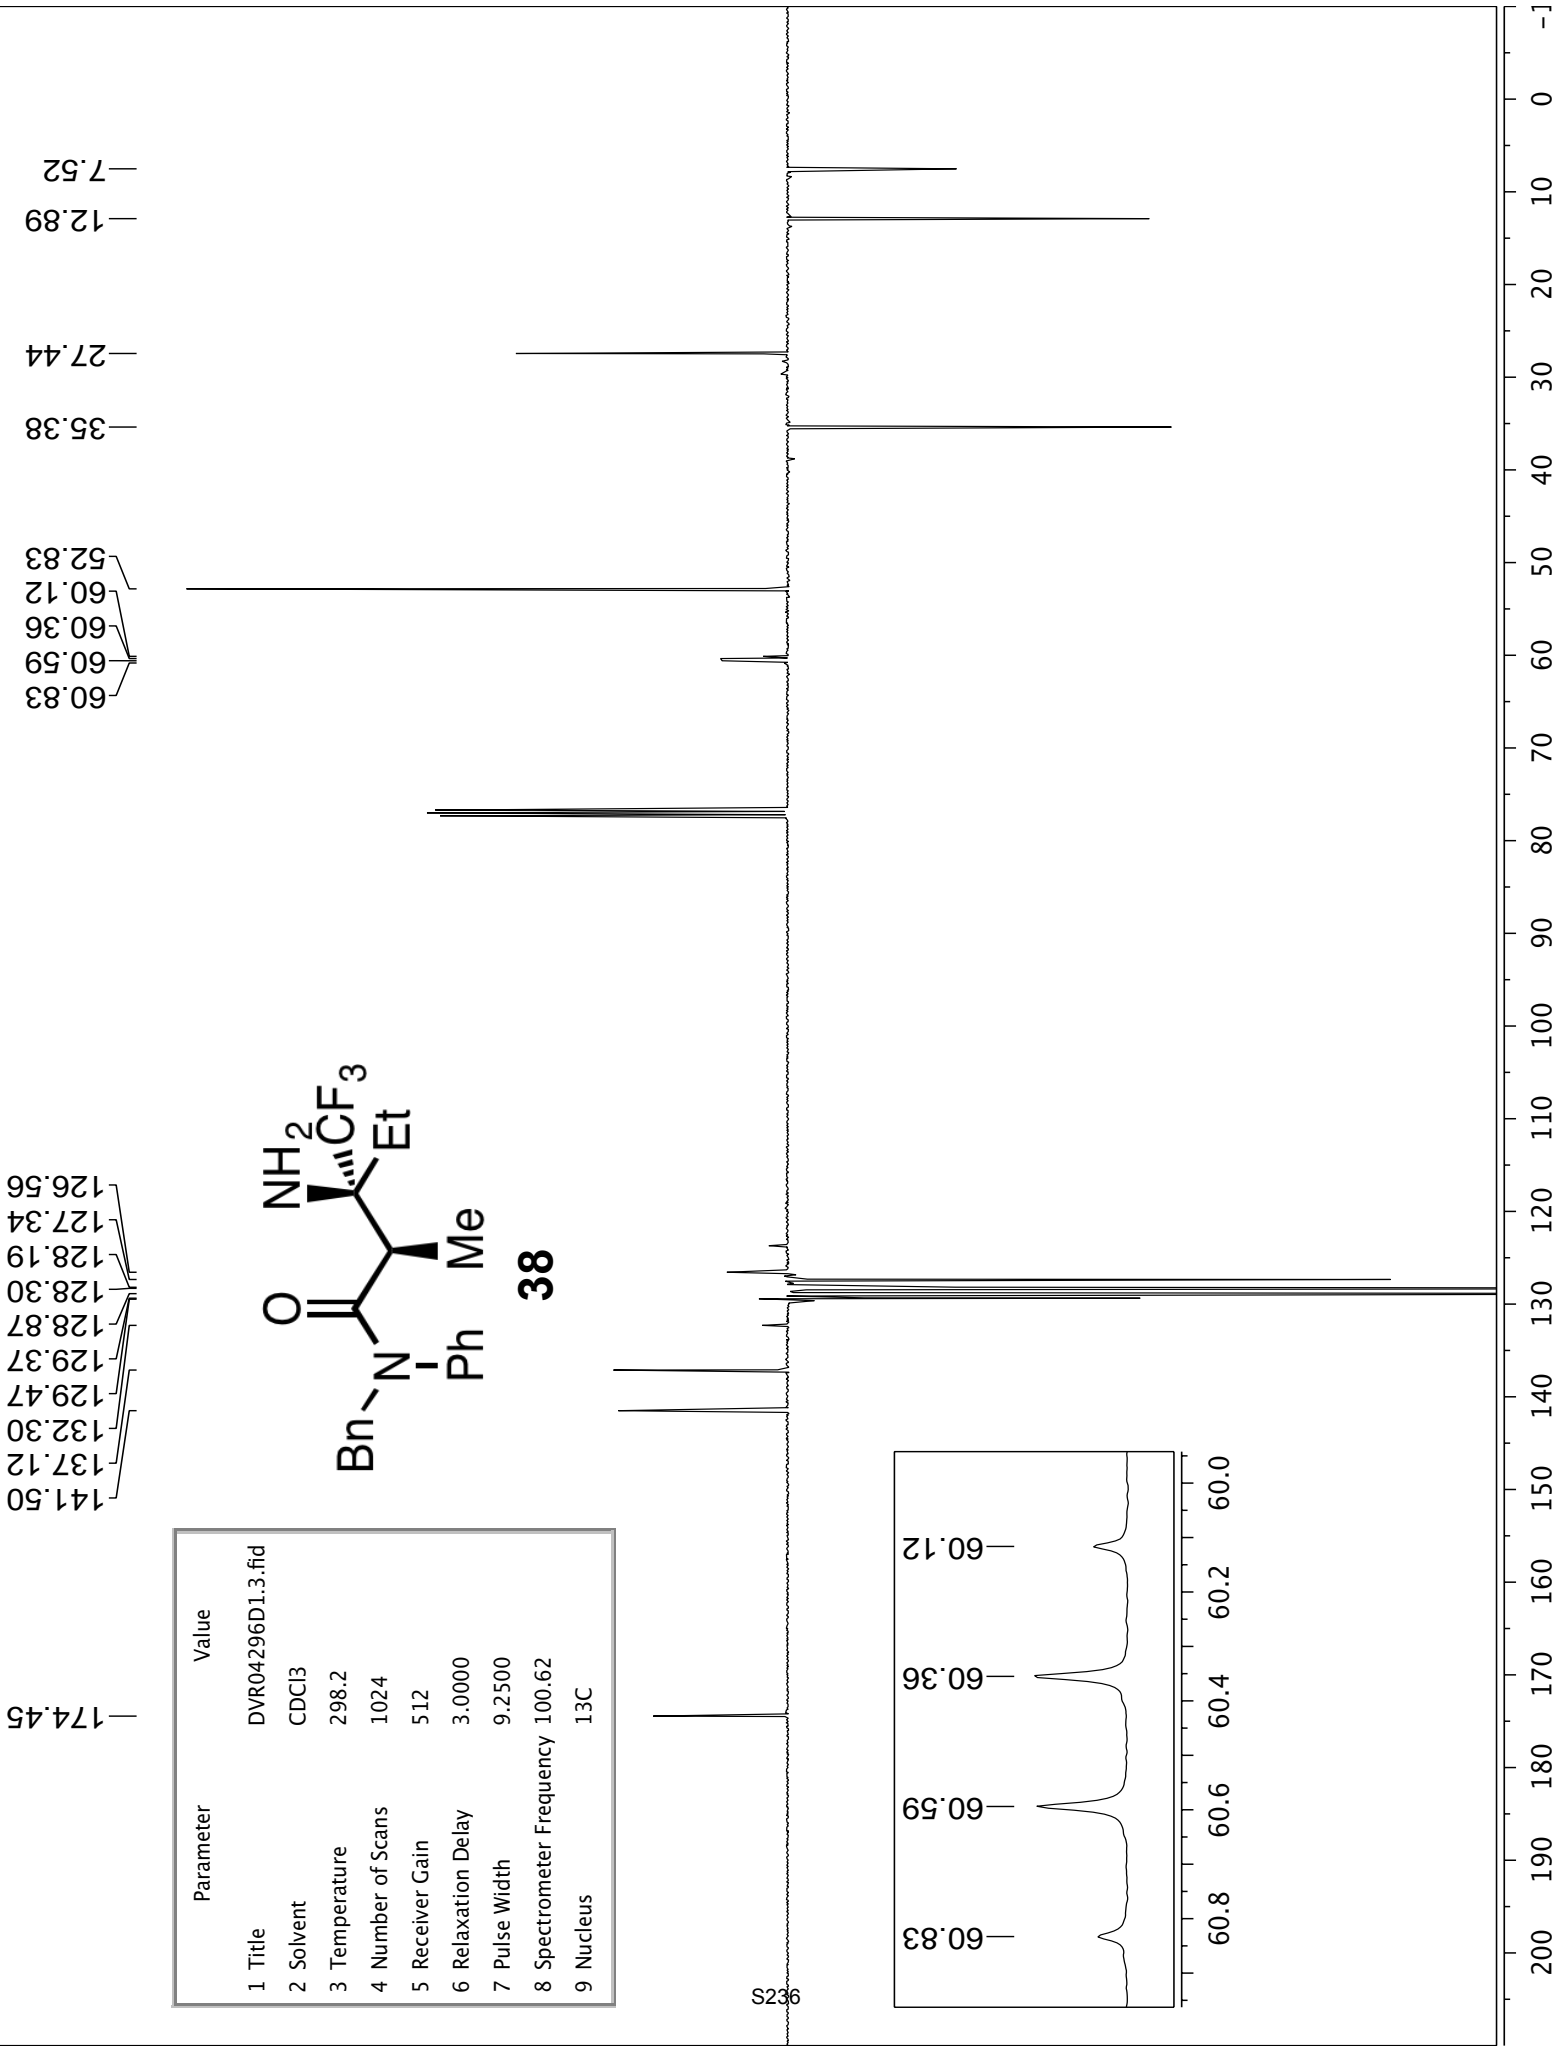

| Parameter                | Value            |
|--------------------------|------------------|
| 1 Title                  | DVR04296D1.3.fid |
| 2 Solvent                | CDCl3            |
| 3 Temperature            | 298.2            |
| 4 Number of Scans        | 1024             |
| 5 Receiver Gain          | 512              |
| 6 Relaxation Delay       | 3.0000           |
| 7 Pulse Width            | 9.2500           |
| 8 Spectrometer Frequency | 100.62           |
| 9 Nucleus                | 13C              |

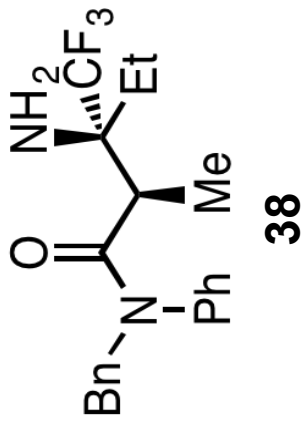

141.50  
137.12  
132.30  
129.47  
129.37  
128.87  
128.30  
128.19  
127.34  
126.56

60.83  
60.59  
60.36  
60.12  
52.83  
35.38  
27.44  
12.89  
-7.52

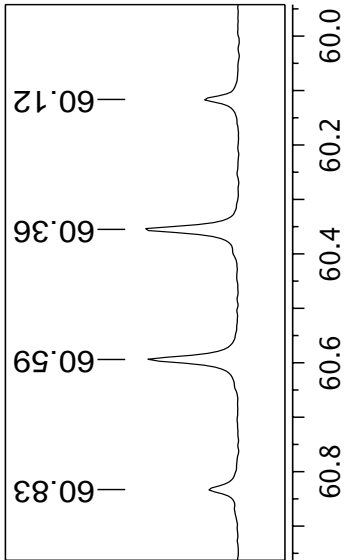

9235

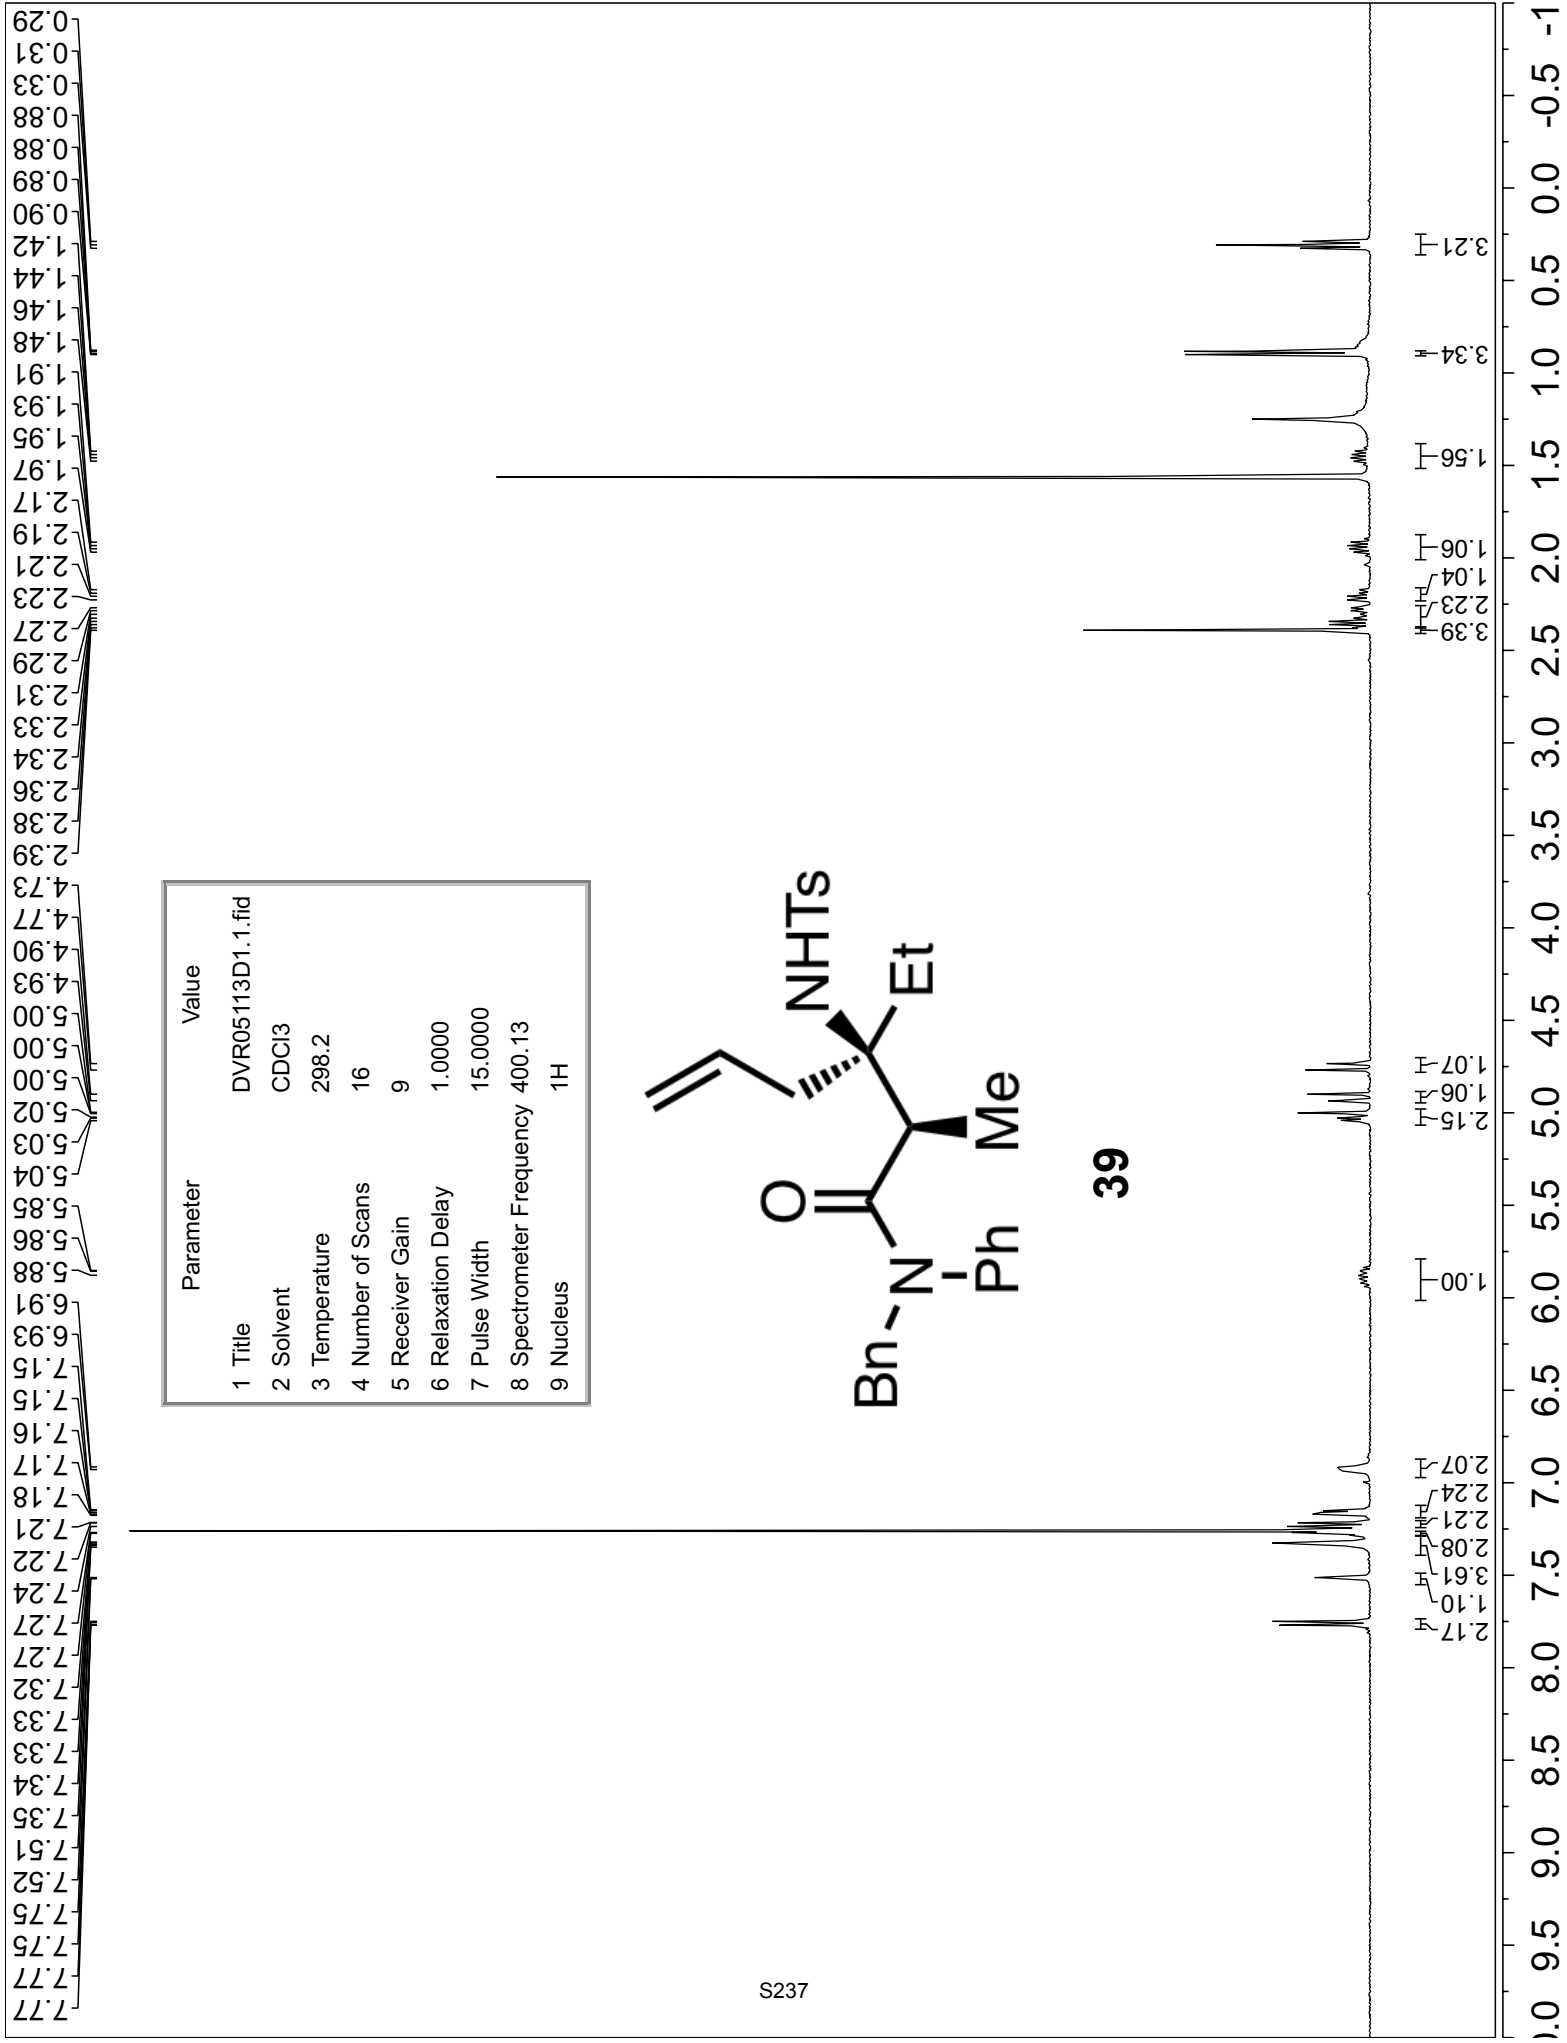

| Parameter                | Value            |
|--------------------------|------------------|
| 1 Title                  | DVR05113D1.1.fid |
| 2 Solvent                | CDCl3            |
| 3 Temperature            | 298.2            |
| 4 Number of Scans        | 16               |
| 5 Receiver Gain          | 9                |
| 6 Relaxation Delay       | 1.0000           |
| 7 Pulse Width            | 15.0000          |
| 8 Spectrometer Frequency | 400.13           |
| 9 Nucleus                | <sup>1</sup> H   |

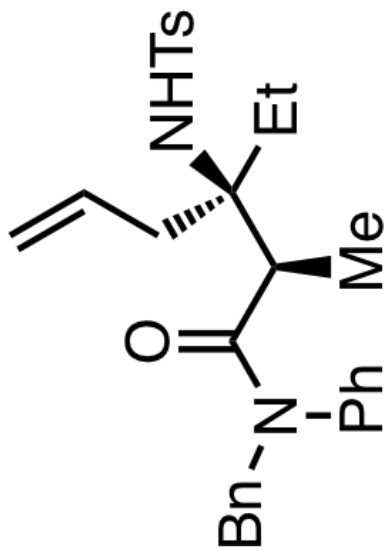

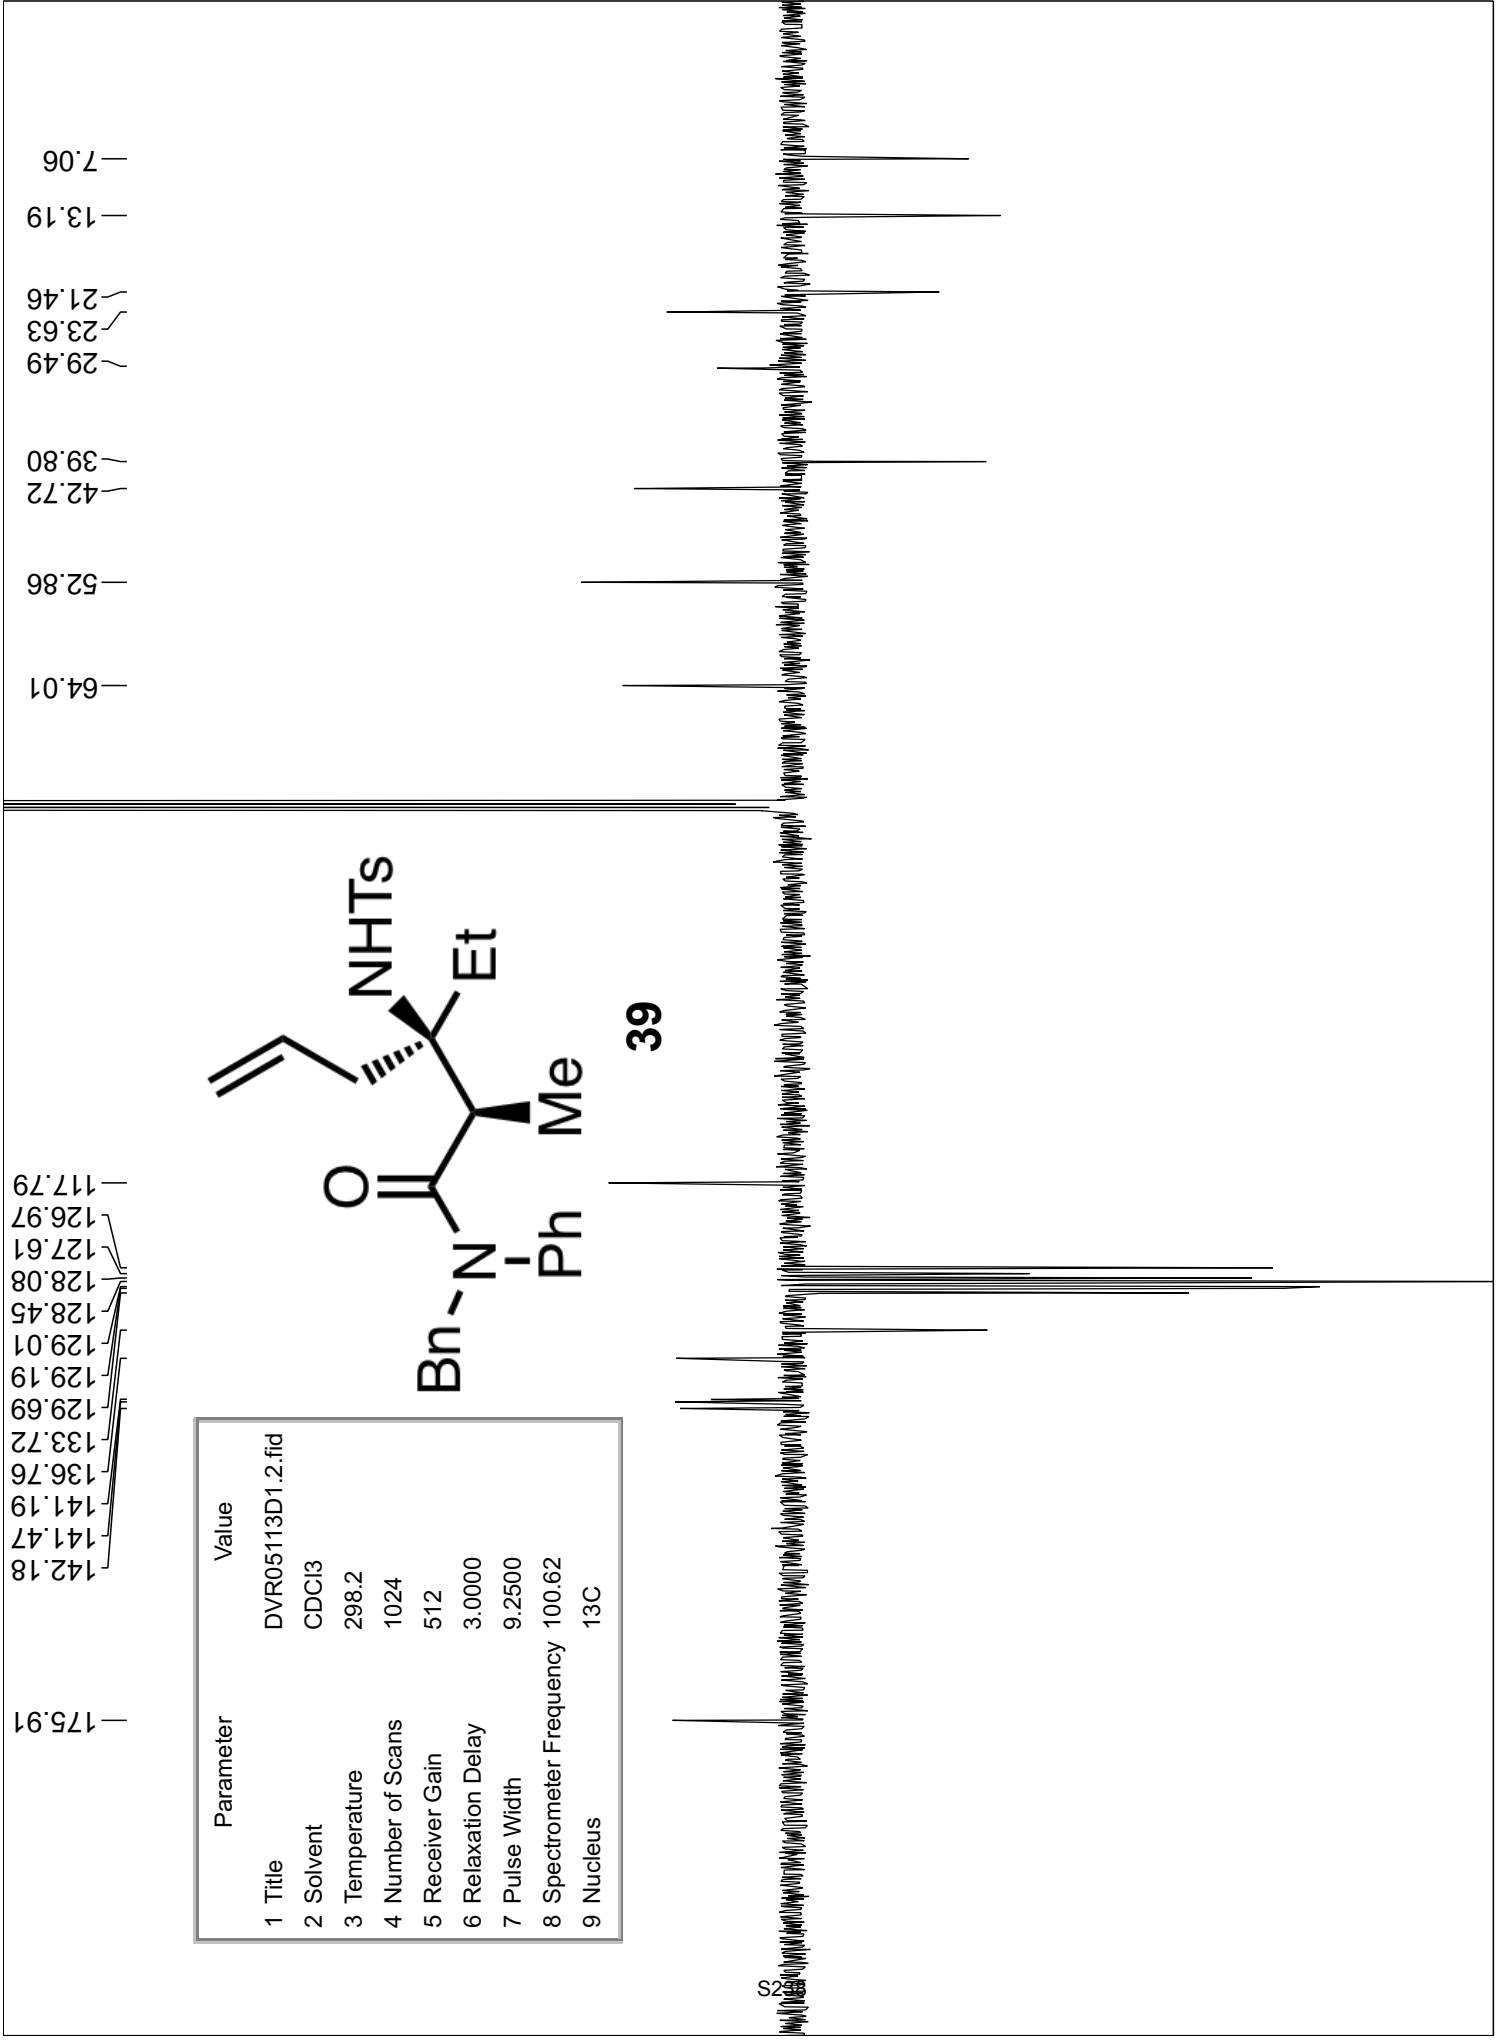

| Parameter                | Value            |
|--------------------------|------------------|
| 1 Title                  | DVR04259H1.1.fid |
| 2 Solvent                | CDCl3            |
| 3 Temperature            | 298.2            |
| 4 Number of Scans        | 16               |
| 5 Receiver Gain          | 10               |
| 6 Relaxation Delay       | 1.0000           |
| 7 Pulse Width            | 15.0000          |
| 8 Spectrometer Frequency | 400.13           |
| 9 Nucleus                | <sup>1</sup> H   |

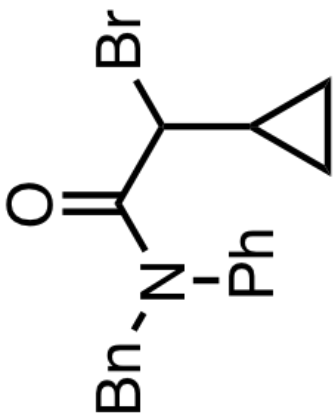

40

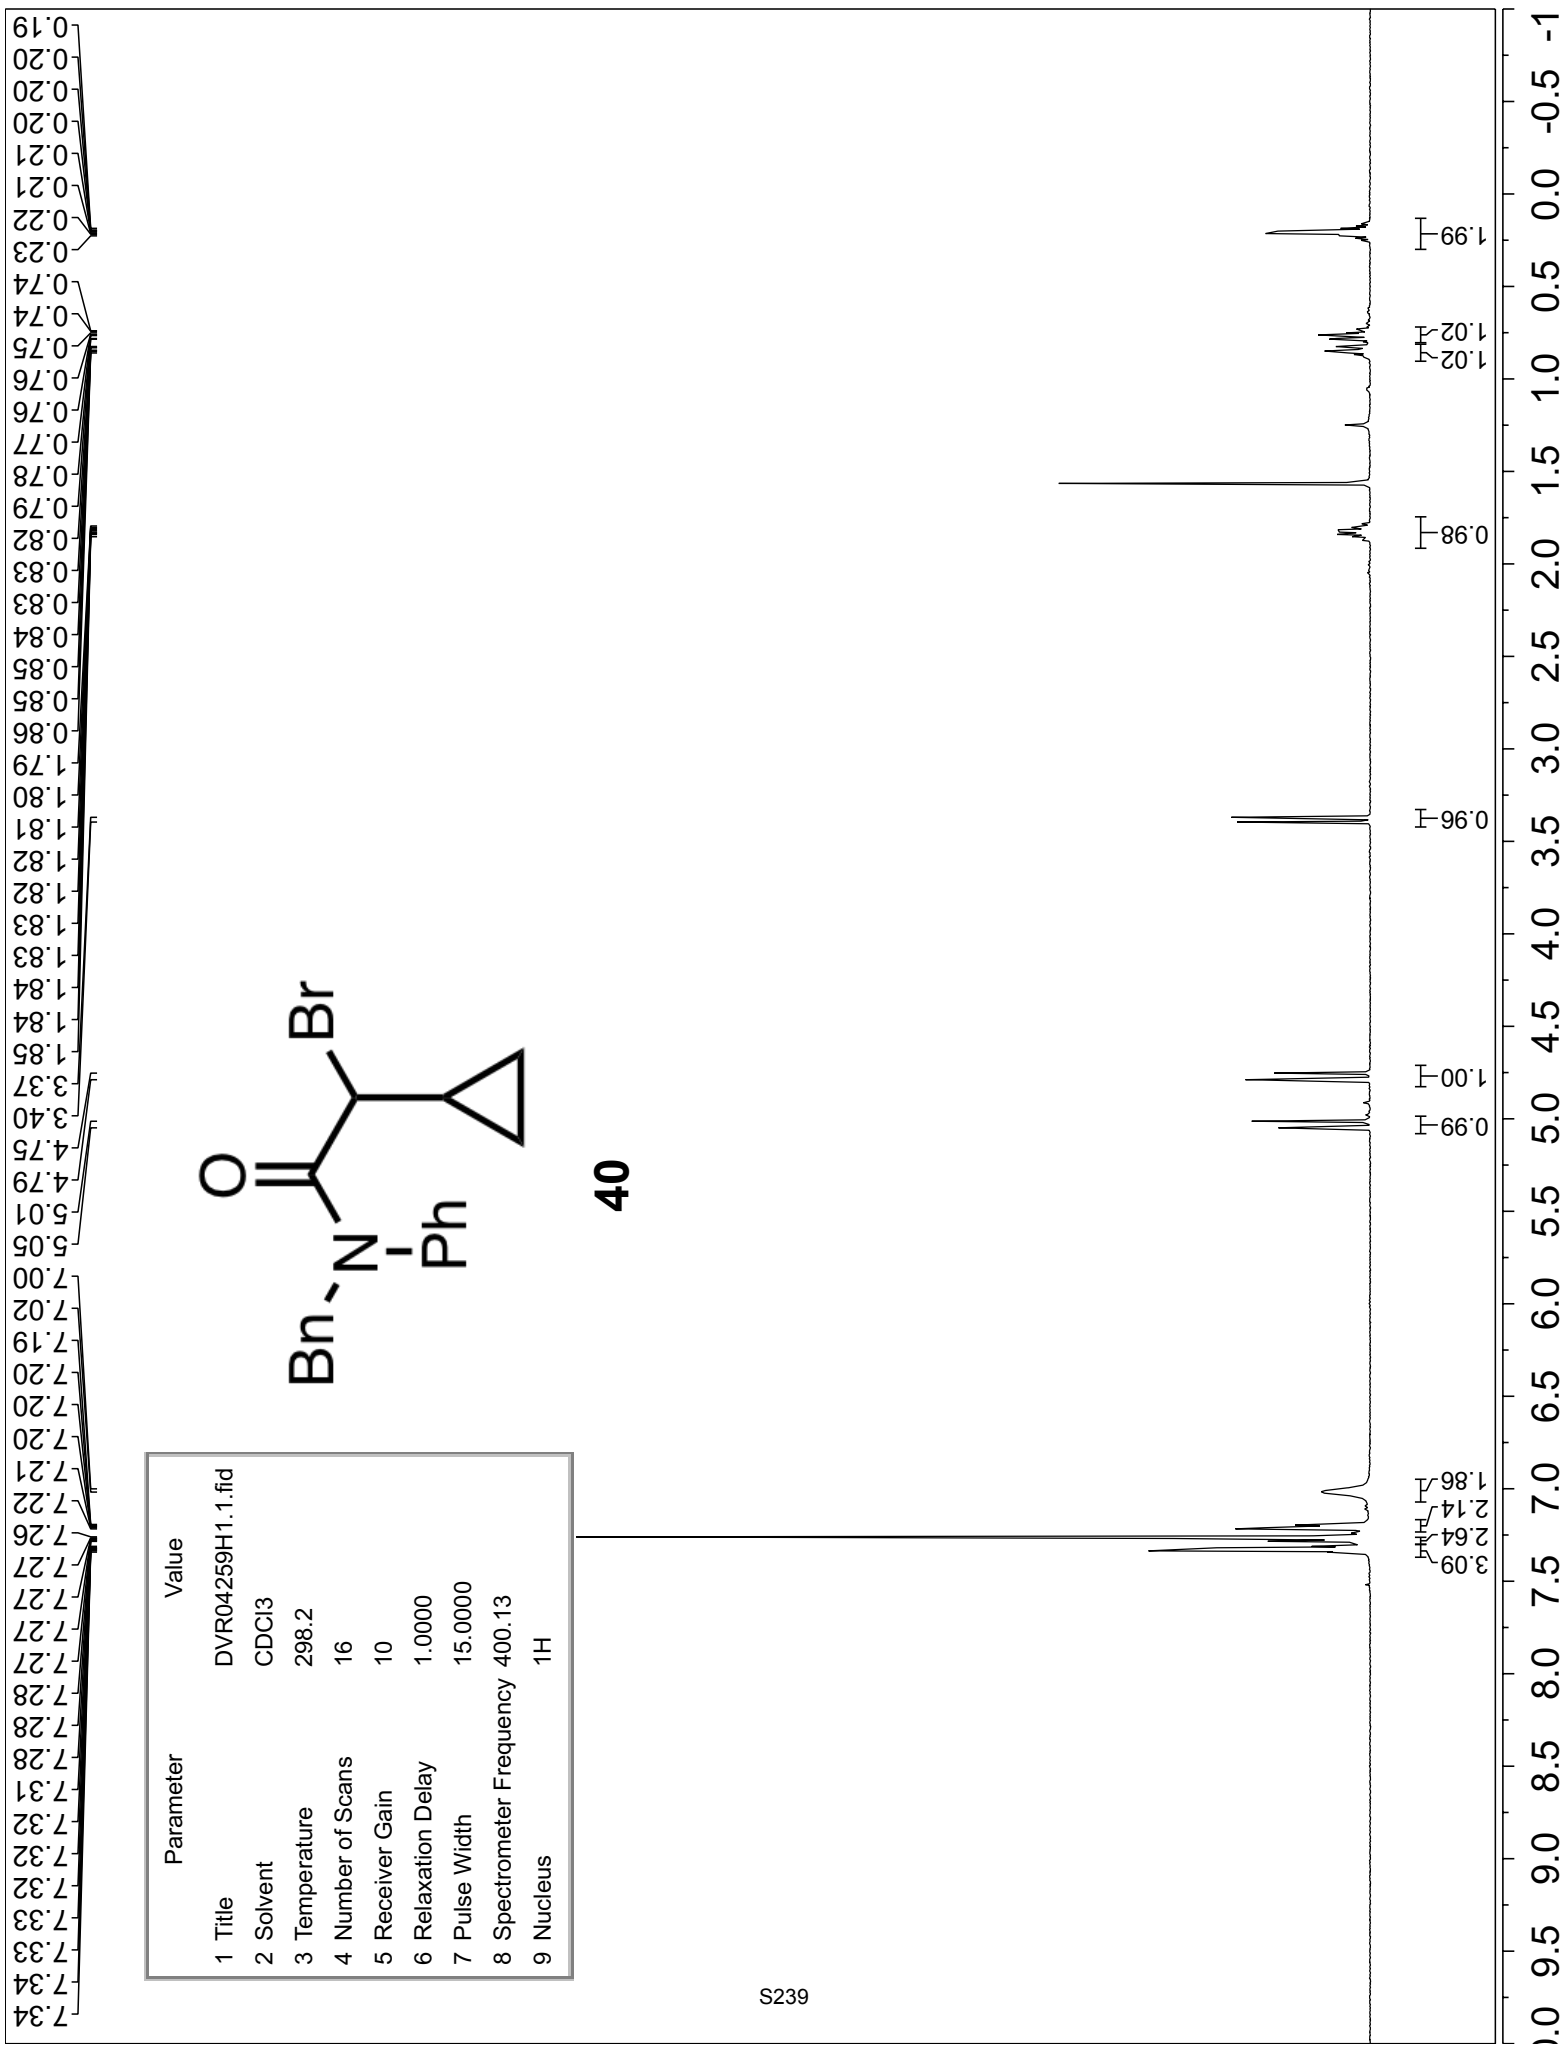

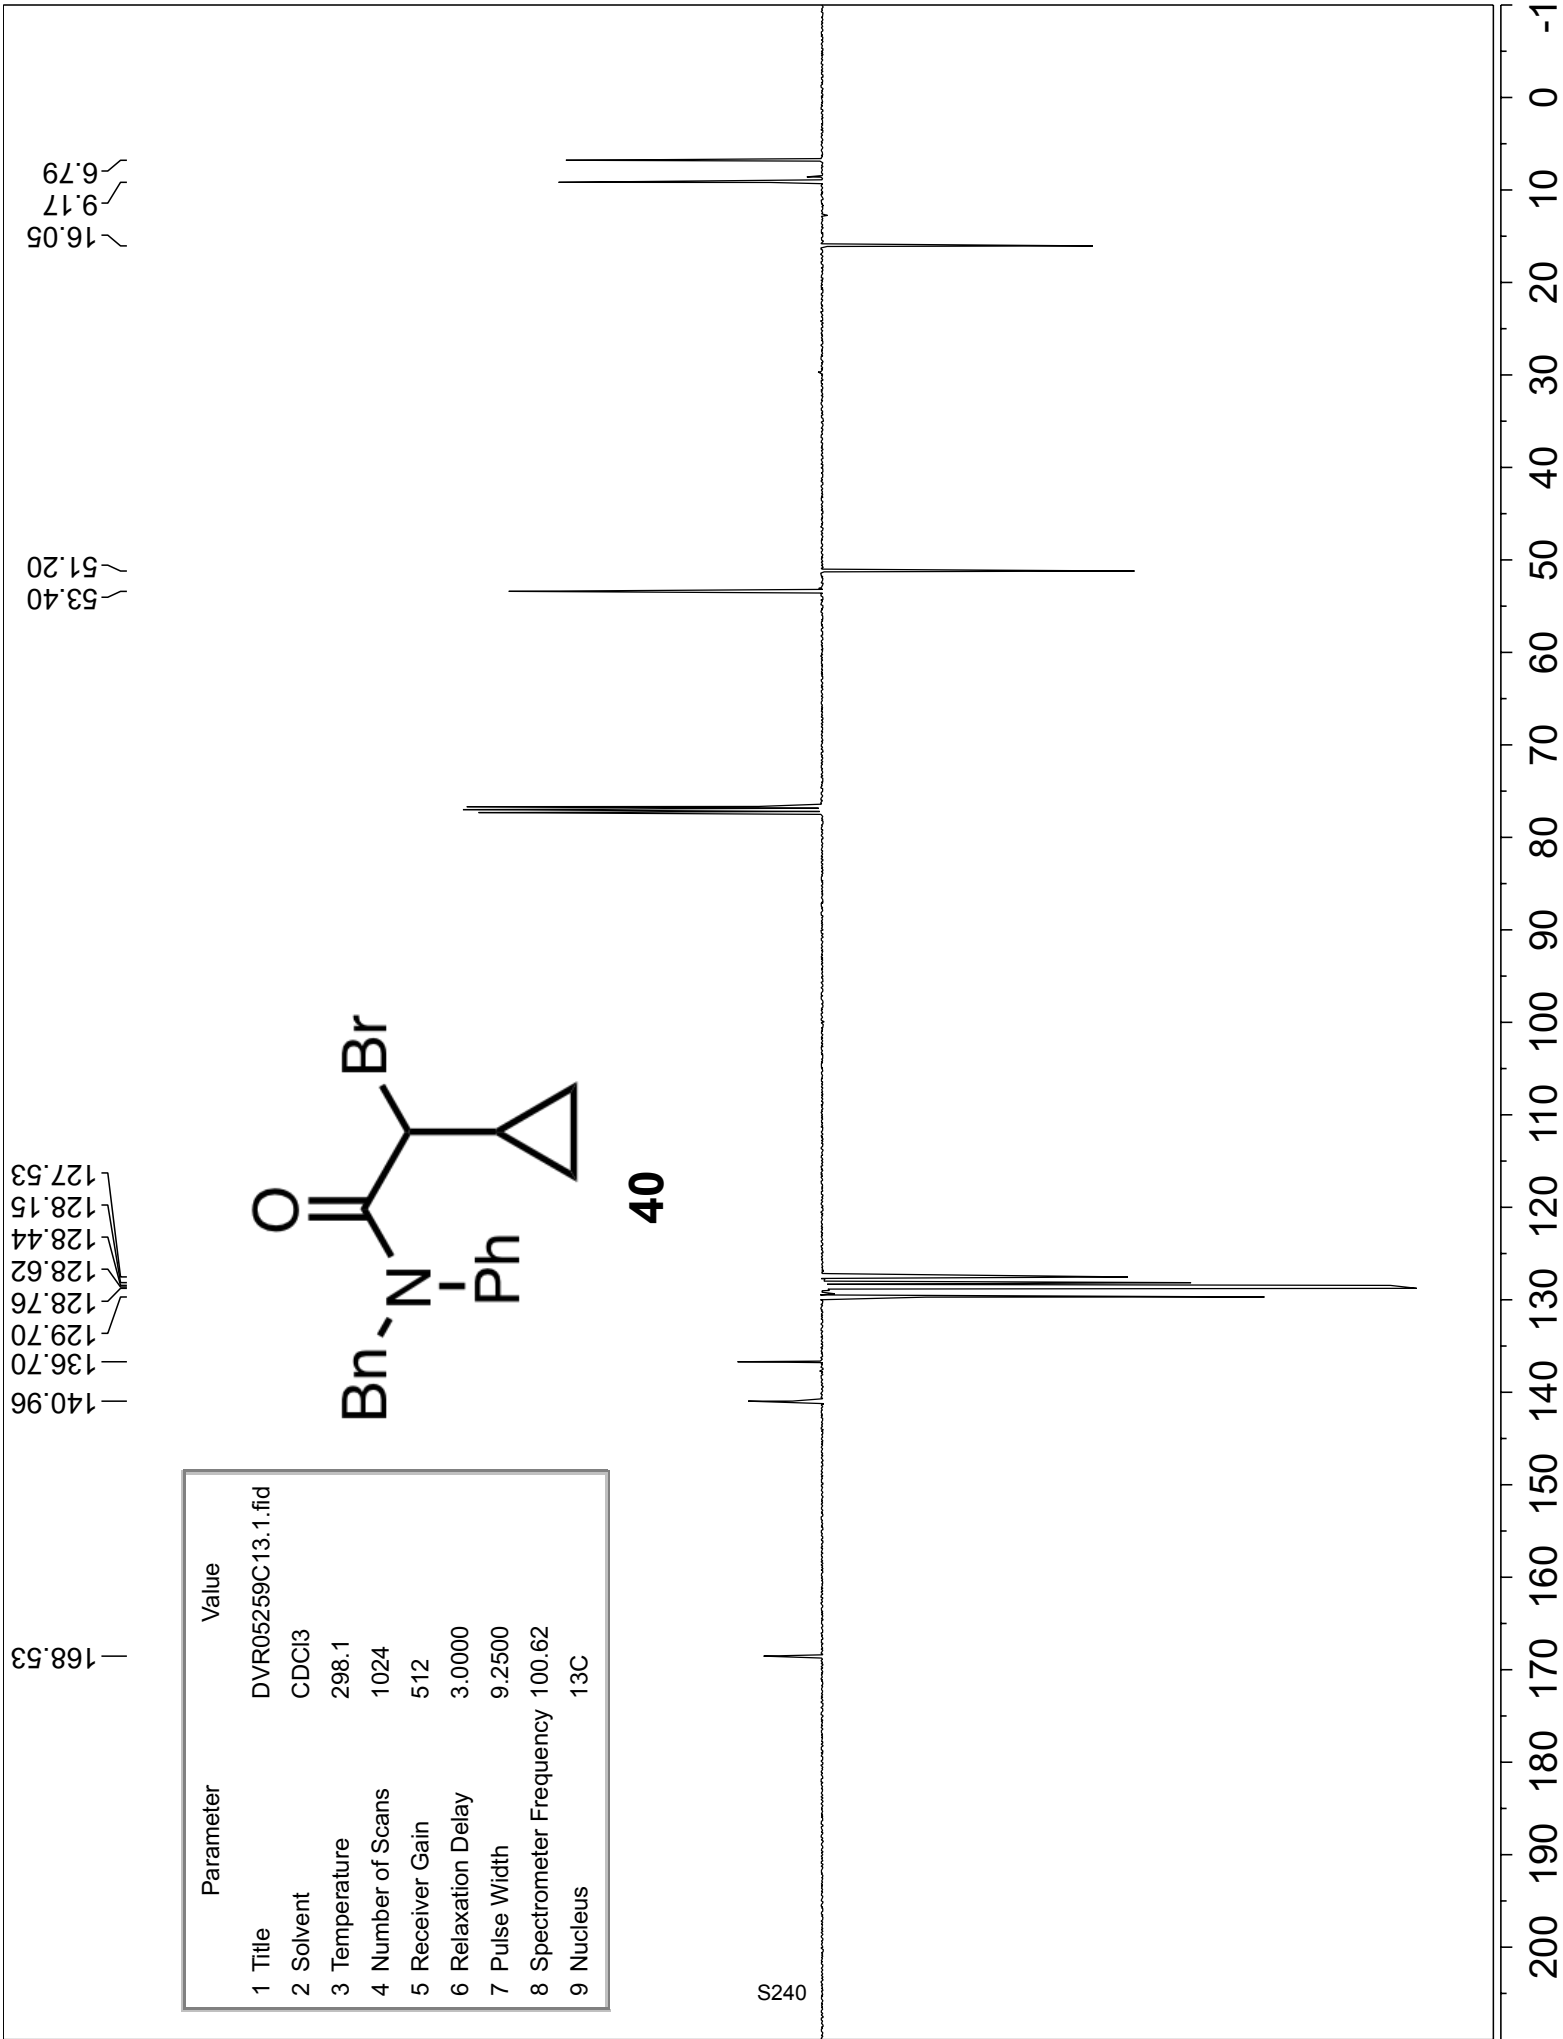

| Parameter                | Value            |
|--------------------------|------------------|
| 1 Title                  | DVR05067D1.1.fid |
| 2 Solvent                | CDCl3            |
| 3 Temperature            | 298.2            |
| 4 Number of Scans        | 16               |
| 5 Receiver Gain          | 4                |
| 6 Relaxation Delay       | 1.0000           |
| 7 Pulse Width            | 15.0000          |
| 8 Spectrometer Frequency | 400.13           |
| 9 Nucleus                | <sup>1</sup> H   |

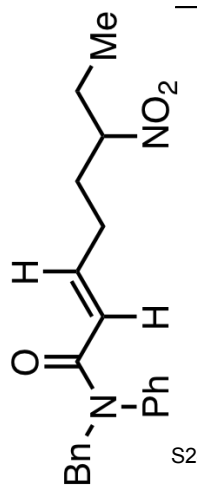

**41**

S241

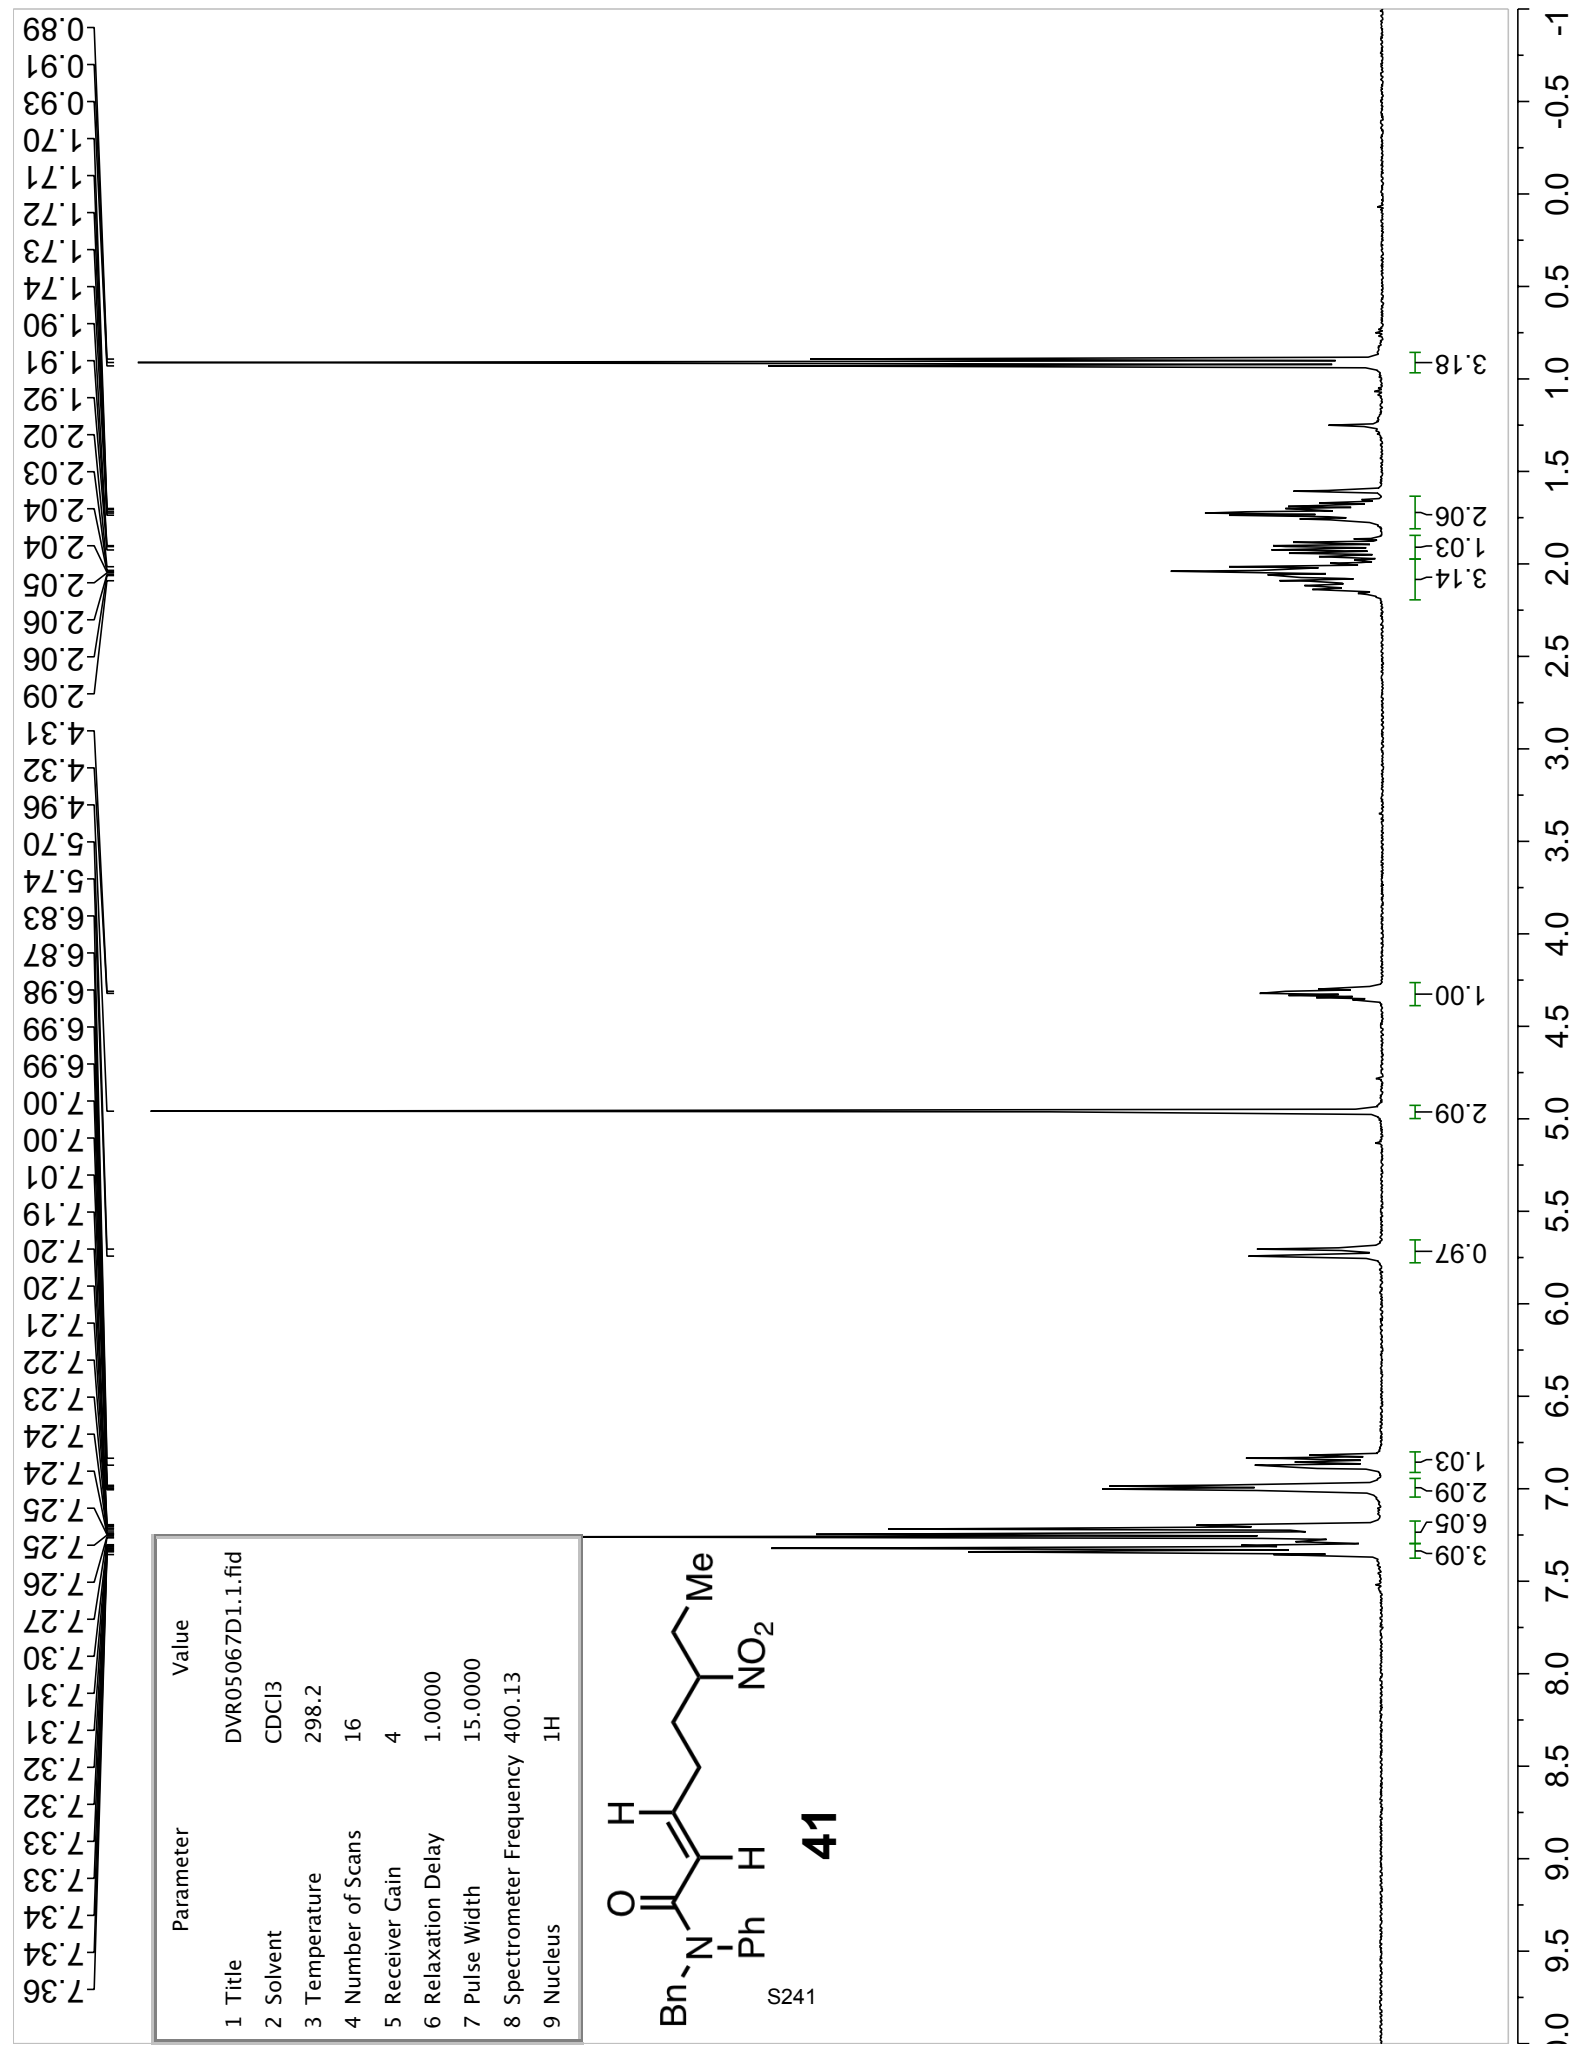

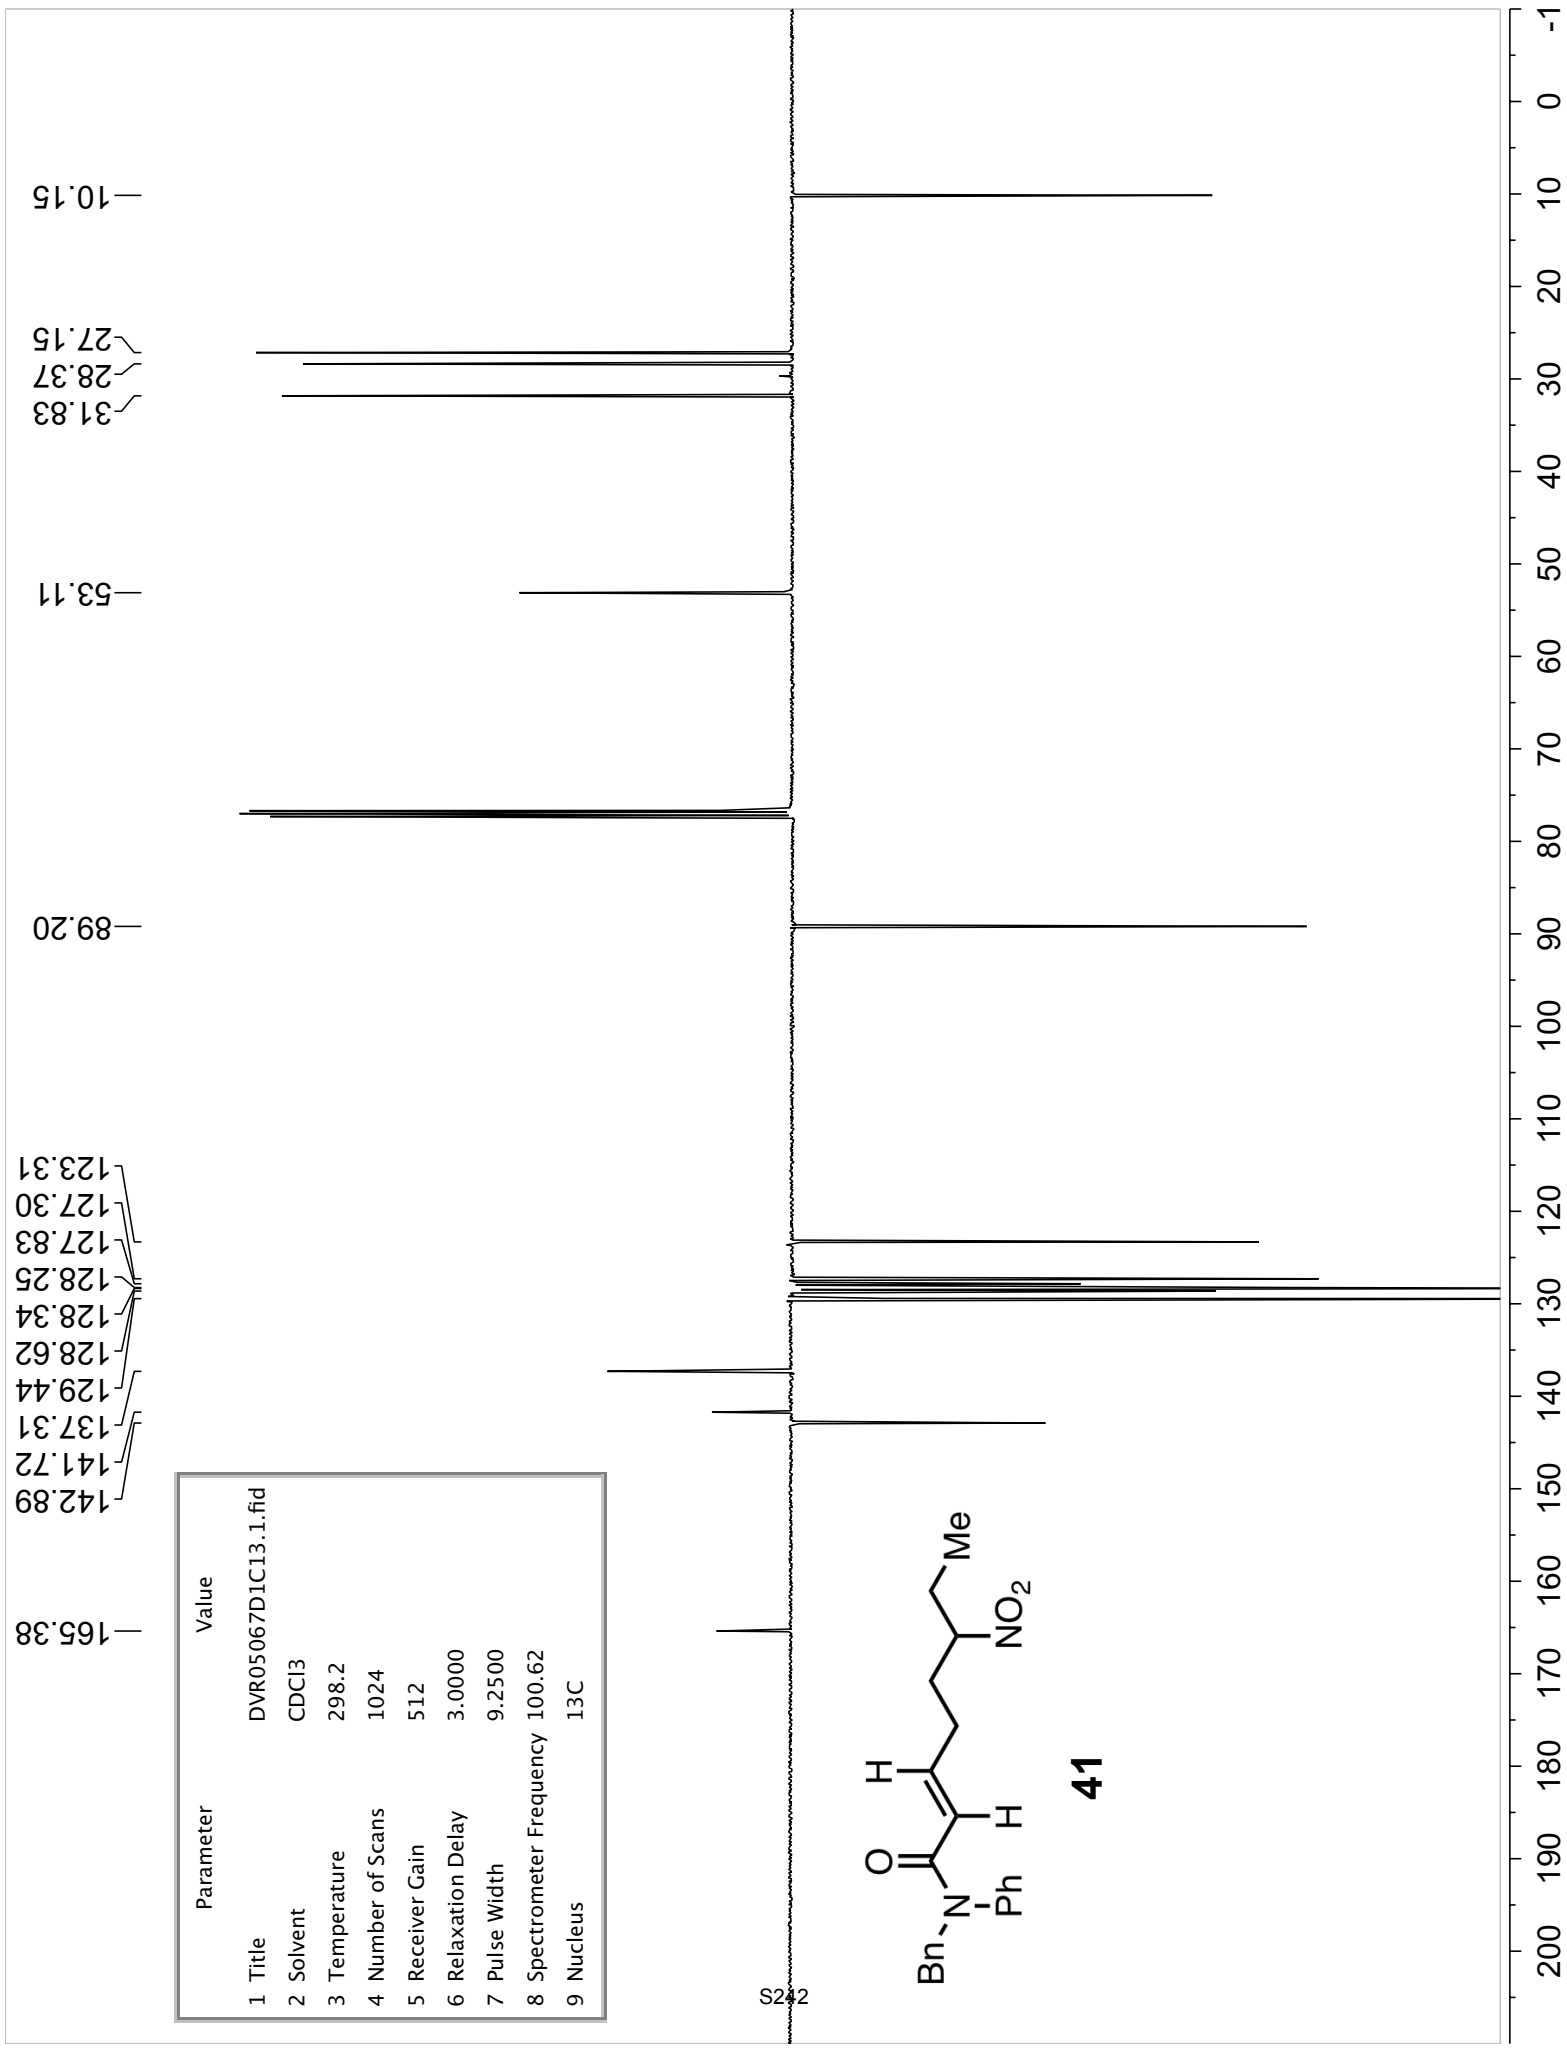

| Parameter                | Value               |
|--------------------------|---------------------|
| 1 Title                  | DVR05067D1C13.1.fid |
| 2 Solvent                | CDCl3               |
| 3 Temperature            | 298.2               |
| 4 Number of Scans        | 1024                |
| 5 Receiver Gain          | 512                 |
| 6 Relaxation Delay       | 3.0000              |
| 7 Pulse Width            | 9.2500              |
| 8 Spectrometer Frequency | 100.62              |
| 9 Nucleus                | 13C                 |

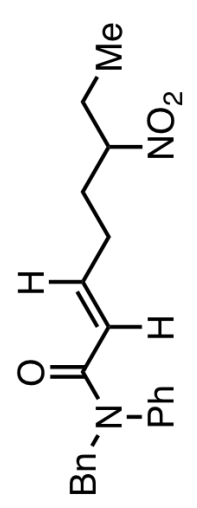

41



## ==== Shimadzu LCsolution Analysis Report ====

C:\LabSolutions\Data\DMMDVR04136RAC SYN 3\_7142016\_1001 AM\_3.lcd  
 Acquired by : LC User  
 Sample Name : DVR04136RAC SYN 3  
 Sample ID : DVR04136RAC SYN 3  
 Tray# : 1  
 Vial # : 6  
 Injection Volume : 2 uL  
 Data File Name : DVR04136RAC SYN 3\_7142016\_1001 AM\_3.lcd  
 Method File Name : col2\_0.8isoiPA\_30min\_1ML\_220and210.lcm  
 Batch File Name : DMM.lcb  
 Report File Name : Default.lcr  
 Data Acquired : 7/14/2016 12:14:11 PM  
 Data Processed : 7/14/2016 12:44:14 PM

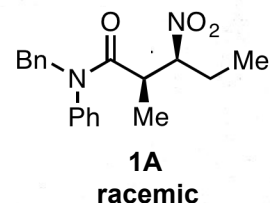

### <Chromatogram>

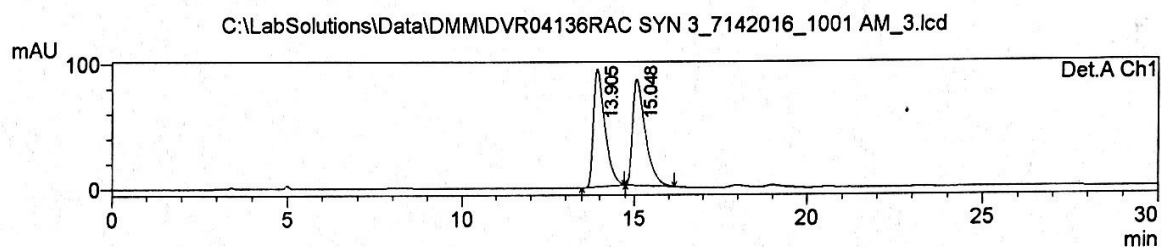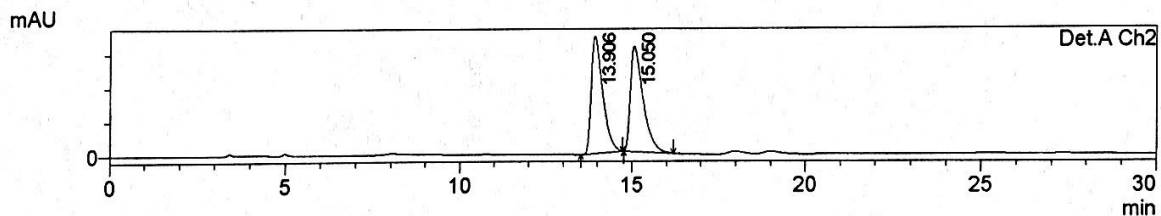

- 1 Det.A Ch1/220nm
- 2 Det.A Ch2/210nm

PeakTable

Detector A Ch1 220nm

| Peak# | Ret. Time | Area    | Height | Area %  | Height % |
|-------|-----------|---------|--------|---------|----------|
| 1     | 13.905    | 2190844 | 95013  | 50.043  | 52.727   |
| 2     | 15.048    | 2187053 | 85184  | 49.957  | 47.273   |
| Total |           | 4377897 | 180197 | 100.000 | 100.000  |

PeakTable

Detector A Ch2 210nm

| Peak# | Ret. Time | Area    | Height | Area %  | Height % |
|-------|-----------|---------|--------|---------|----------|
| 1     | 13.906    | 4055770 | 175507 | 50.093  | 52.761   |
| 2     | 15.050    | 4040646 | 157140 | 49.907  | 47.239   |
| Total |           | 8096415 | 332647 | 100.000 | 100.000  |

# ==== Shimadzu LCsolution Analysis Report ====

C:\LabSolutions\Data\DMMDVR04136 SYN 2\_7142016\_1001 AM\_7.lcd  
 Acquired by : LC User  
 Sample Name : DVR04136 SYN 2  
 Sample ID : DVR04136 SYN 2  
 Tray# : 1  
 Vial # : 7  
 Injection Volume : 2 uL  
 Data File Name : DVR04136 SYN 2\_7142016\_1001 AM\_7.lcd  
 Method File Name : col2\_0.8isoiPA\_30min\_1ML\_220and210.lcm  
 Batch File Name : DMM.lcb  
 Report File Name : Default.lcr  
 Data Acquired : 7/14/2016 1:25:10 PM  
 Data Processed : 7/14/2016 1:55:11 PM

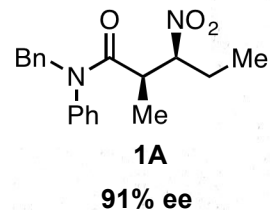

## <Chromatogram>

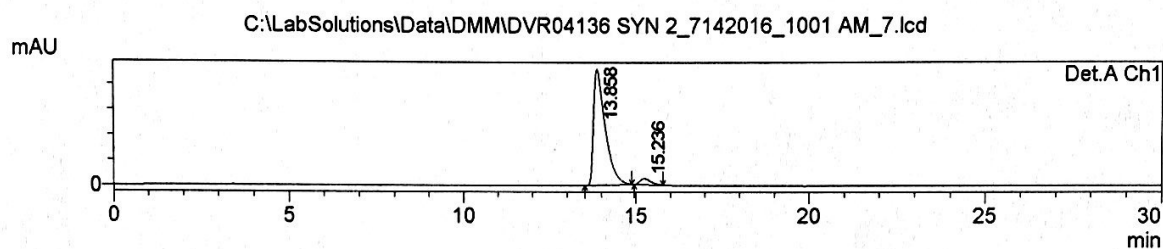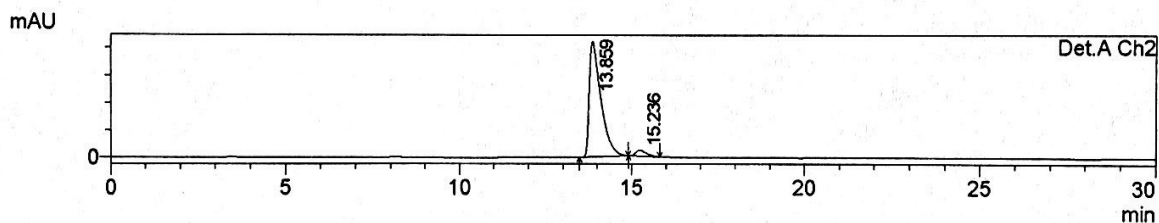

- 1 Det.A Ch1/220nm
- 2 Det.A Ch2/210nm

PeakTable

Detector A Ch1 220nm

| Peak# | Ret. Time | Area    | Height | Area %  | Height % |
|-------|-----------|---------|--------|---------|----------|
| 1     | 13.858    | 5398412 | 229800 | 95.553  | 95.199   |
| 2     | 15.236    | 251218  | 11590  | 4.447   | 4.801    |
| Total |           | 5649631 | 241390 | 100.000 | 100.000  |

PeakTable

Detector A Ch2 210nm

| Peak# | Ret. Time | Area     | Height | Area %  | Height % |
|-------|-----------|----------|--------|---------|----------|
| 1     | 13.859    | 9954946  | 422399 | 95.449  | 95.115   |
| 2     | 15.236    | 474650   | 21693  | 4.551   | 4.885    |
| Total |           | 10429596 | 444092 | 100.000 | 100.000  |

## ==== Shimadzu LCsolution Analysis Report ====

C:\LabSolutions\Data\DMM\DVR04135RAC ANTI 3\_7162016\_1752 PM\_2.lcd  
 Acquired by : LC User  
 Sample Name : DVR04135RAC ANTI 3  
 Sample ID : DVR04135RAC ANTI 3  
 Tray# : 1  
 Vial # : 6  
 Injection Volume : 2 uL  
 Data File Name : DVR04135RAC ANTI 3\_7162016\_1752 PM\_2.lcd  
 Method File Name : col2\_0.8isoiPA\_45min\_1ML\_220and210.lcm  
 Batch File Name : DMM.lcb  
 Report File Name : Default.lcr  
 Data Acquired : 7/16/2016 6:38:35 PM  
 Data Processed : 7/16/2016 10:46:56 PM

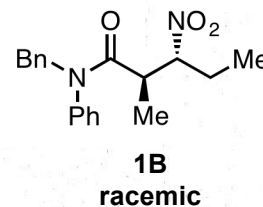

### <Chromatogram>

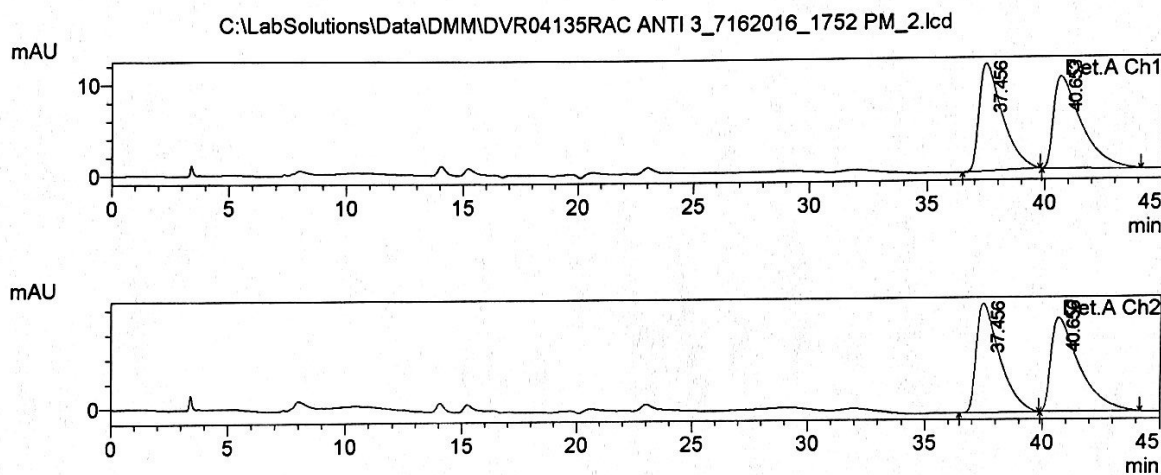

1 Det.A Ch1/220nm  
 2 Det.A Ch2/210nm

PeakTable

Detector A Ch1 220nm

| Peak# | Ret. Time | Area    | Height | Area %  | Height % |
|-------|-----------|---------|--------|---------|----------|
| 1     | 37.456    | 817118  | 11850  | 49.593  | 53.836   |
| 2     | 40.653    | 830543  | 10161  | 50.407  | 46.164   |
| Total |           | 1647661 | 22011  | 100.000 | 100.000  |

PeakTable

Detector A Ch2 210nm

| Peak# | Ret. Time | Area    | Height | Area %  | Height % |
|-------|-----------|---------|--------|---------|----------|
| 1     | 37.456    | 1545683 | 22392  | 49.041  | 53.793   |
| 2     | 40.656    | 1606133 | 19234  | 50.959  | 46.207   |
| Total |           | 3151816 | 41627  | 100.000 | 100.000  |

## ==== Shimadzu LCsolution Analysis Report ====

C:\LabSolutions\Data\DMM\DVR04135 ANTI 3\_7162016\_1752 PM\_4.lcd  
 Acquired by : LC User  
 Sample Name : DVR04135 ANTI 3  
 Sample ID : DVR04135 ANTI 3  
 Tray# : 1  
 Vail # : 7  
 Injection Volume : 2 uL  
 Data File Name : DVR04135 ANTI 3\_7162016\_1752 PM\_4.lcd  
 Method File Name : col2\_0.8isoiPA\_45min\_1ML\_220and210.lcm  
 Batch File Name : DMM.lcb  
 Report File Name : Default.lcr  
 Data Acquired : 7/16/2016 8:19:26 PM  
 Data Processed : 7/16/2016 10:48:54 PM

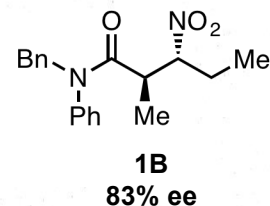

### <Chromatogram>

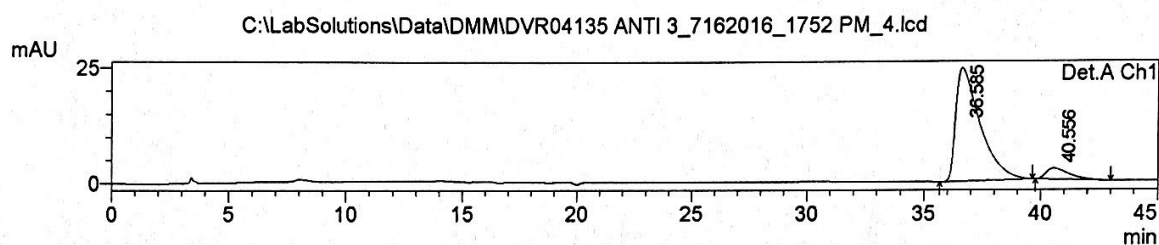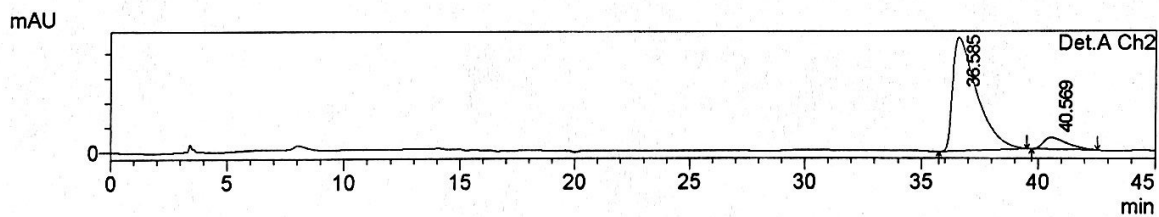

- 1 Det.A Ch1/220nm
- 2 Det.A Ch2/210nm

PeakTable

Detector A Ch1 220nm

| Peak# | Ret. Time | Area    | Height | Area %  | Height % |
|-------|-----------|---------|--------|---------|----------|
| 1     | 36.585    | 1778887 | 24567  | 91.507  | 91.057   |
| 2     | 40.556    | 165100  | 2413   | 8.493   | 8.943    |
| Total |           | 1943987 | 26980  | 100.000 | 100.000  |

PeakTable

Detector A Ch2 210nm

| Peak# | Ret. Time | Area    | Height | Area %  | Height % |
|-------|-----------|---------|--------|---------|----------|
| 1     | 36.585    | 3325547 | 46346  | 90.964  | 90.776   |
| 2     | 40.569    | 330327  | 4709   | 9.036   | 9.224    |
| Total |           | 3655875 | 51055  | 100.000 | 100.000  |

## ==== Shimadzu LCsolution Analysis Report ====

C:\LabSolutions\Data\DMMDVR04196 RAC SYN1\_9262016\_954 AM\_9.lcd  
 Acquired by : LC User  
 Sample Name : DVR04196 RAC SYN1  
 Sample ID : DVR04196 RAC SYN1  
 Tray# : 1  
 Vial # : 1  
 Injection Volume : 2 uL  
 Data File Name : DVR04196 RAC SYN1\_9262016\_954 AM\_9.lcd  
 Method File Name : col1\_1isoiPA\_30min\_1ML\_220and210.lcm  
 Batch File Name : DMM.lcb  
 Report File Name : Default.lcr  
 Data Acquired : 9/26/2016 2:54:01 PM  
 Data Processed : 9/26/2016 3:24:02 PM

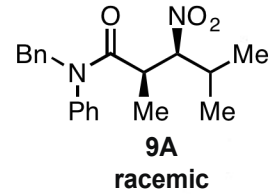

### <Chromatogram>

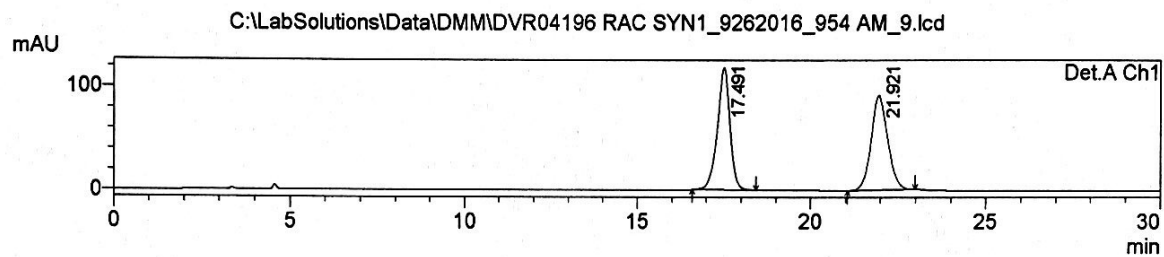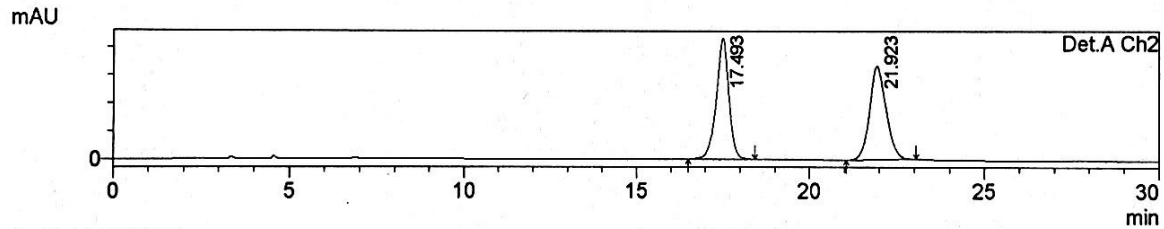

1 Det.A Ch1/220nm  
 2 Det.A Ch2/210nm

PeakTable

Detector A Ch1 220nm

| Peak# | Ret. Time | Area    | Height | Area %  | Height % |
|-------|-----------|---------|--------|---------|----------|
| 1     | 17.491    | 2997080 | 118652 | 50.031  | 56.408   |
| 2     | 21.921    | 2993359 | 91694  | 49.969  | 43.592   |
| Total |           | 5990440 | 210346 | 100.000 | 100.000  |

PeakTable

Detector A Ch2 210nm

| Peak# | Ret. Time | Area     | Height | Area %  | Height % |
|-------|-----------|----------|--------|---------|----------|
| 1     | 17.493    | 5481415  | 216292 | 50.105  | 56.428   |
| 2     | 21.923    | 5458508  | 167013 | 49.895  | 43.572   |
| Total |           | 10939923 | 383305 | 100.000 | 100.000  |

## ==== Shimadzu LCsolution Analysis Report ====

Acquired by : LC User  
 Sample Name : DVR04196 SYN1  
 Sample ID : DVR04196 SYN1  
 Tray# : 1  
 Vial # : 2  
 Injection Volume : 2 uL  
 Data File Name : DVR04196 SYN1\_9262016\_954 AM\_1.lcd  
 Method File Name : col1\_1isoiPA\_30min\_1ML\_220and210.lcm  
 Batch File Name : DMM.lcb  
 Report File Name : Default.lcr  
 Data Acquired : 9/26/2016 4:04:56 PM  
 Data Processed : 9/26/2016 4:34:56 PM

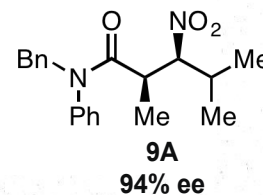

### <Chromatogram>

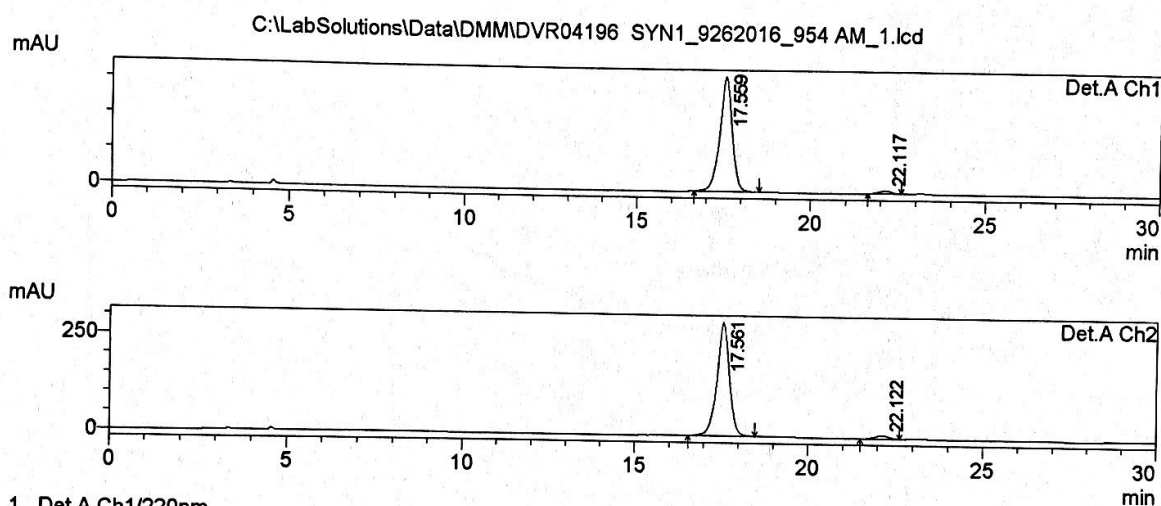

PeakTable

Detector A Ch1 220nm

| Peak# | Ret. Time | Area    | Height | Area %  | Height % |
|-------|-----------|---------|--------|---------|----------|
| 1     | 17.559    | 4033823 | 162734 | 97.235  | 97.433   |
| 2     | 22.117    | 114706  | 4288   | 2.765   | 2.567    |
| Total |           | 4148529 | 167022 | 100.000 | 100.000  |

PeakTable

Detector A Ch2 210nm

| Peak# | Ret. Time | Area    | Height | Area %  | Height % |
|-------|-----------|---------|--------|---------|----------|
| 1     | 17.561    | 7372880 | 296393 | 97.038  | 97.348   |
| 2     | 22.122    | 225026  | 8074   | 2.962   | 2.652    |
| Total |           | 7597906 | 304467 | 100.000 | 100.000  |



## ==== Shimadzu LCsolution Analysis Report ====

Acquired by : LC User  
 Sample Name : DVR04192 RAC ANTI  
 Sample ID : DVR04192 RAC ANTI  
 Tray# : 1  
 Vial # : 1  
 Injection Volume : 2 uL  
 Data File Name : DVR04192 RAC ANTI\_9252016\_1431 PM\_1.lcd  
 Method File Name : col1\_5isoiPA\_30min\_1ML\_220and210.lcm  
 Batch File Name : DMM.lcb  
 Report File Name : Default.lcr  
 Data Acquired : 9/25/2016 3:04:06 PM  
 Data Processed : 9/25/2016 3:34:09 PM

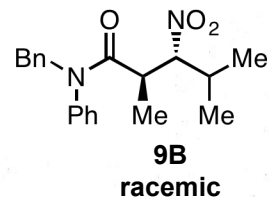

### <Chromatogram>

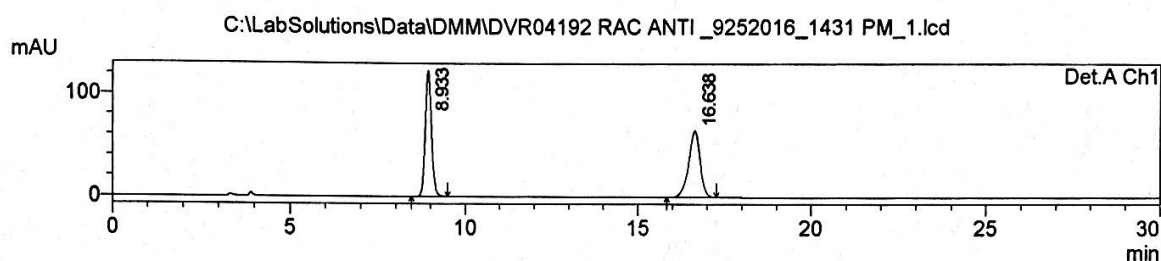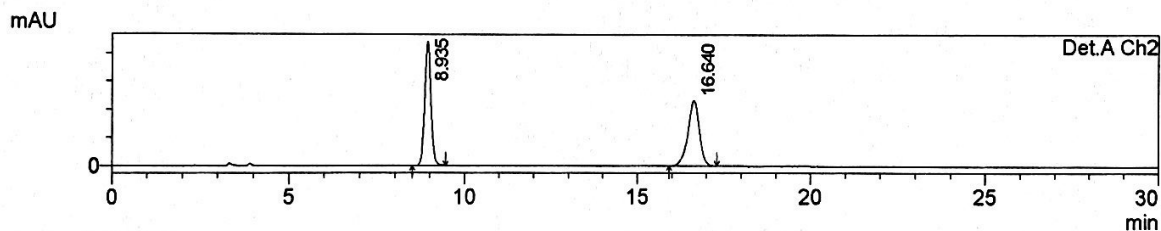

- 1 Det.A Ch1/220nm
- 2 Det.A Ch2/210nm

PeakTable

Detector A Ch1 220nm

| Peak#        | Ret. Time | Area           | Height        | Area %         | Height %       |
|--------------|-----------|----------------|---------------|----------------|----------------|
| 1            | 8.933     | 1508239        | 123366        | 50.180         | 65.477         |
| 2            | 16.638    | 1497399        | 65044         | 49.820         | 34.523         |
| <b>Total</b> |           | <b>3005638</b> | <b>188411</b> | <b>100.000</b> | <b>100.000</b> |

PeakTable

Detector A Ch2 210nm

| Peak#        | Ret. Time | Area           | Height        | Area %         | Height %       |
|--------------|-----------|----------------|---------------|----------------|----------------|
| 1            | 8.935     | 2705991        | 221558        | 50.166         | 65.484         |
| 2            | 16.640    | 2688042        | 116781        | 49.834         | 34.516         |
| <b>Total</b> |           | <b>5394033</b> | <b>338339</b> | <b>100.000</b> | <b>100.000</b> |

## ==== Shimadzu LCsolution Analysis Report ====

Acquired by : LC User  
 Sample Name : DVR04192 ANTI  
 Sample ID : DVR04192 ANTI  
 Tray# : 1  
 Vial # : 2  
 Injection Volume : 2 uL  
 Data File Name : DVR04192 ANTI\_9252016\_1431 PM\_5.lcd  
 Method File Name : col1\_5isoiPA\_30min\_1ML\_220and210.lcm  
 Batch File Name : DMM.lcb  
 Report File Name : Default.lcr  
 Data Acquired : 9/25/2016 4:15:02 PM  
 Data Processed : 9/25/2016 4:45:04 PM

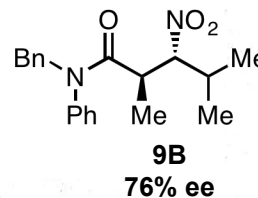

### <Chromatogram>

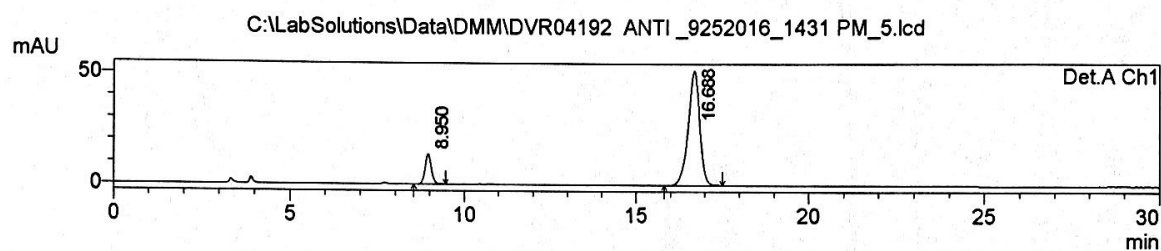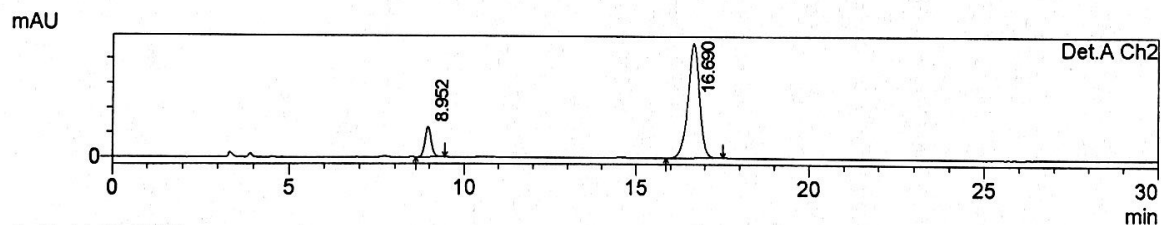

- 1 Det.A Ch1/220nm
- 2 Det.A Ch2/210nm

PeakTable

Detector A Ch1 220nm

| Peak# | Ret. Time | Area    | Height | Area %  | Height % |
|-------|-----------|---------|--------|---------|----------|
| 1     | 8.950     | 167797  | 13712  | 12.237  | 20.879   |
| 2     | 16.688    | 1203456 | 51963  | 87.763  | 79.121   |
| Total |           | 1371253 | 65676  | 100.000 | 100.000  |

PeakTable

Detector A Ch2 210nm

| Peak# | Ret. Time | Area    | Height | Area %  | Height % |
|-------|-----------|---------|--------|---------|----------|
| 1     | 8.952     | 302717  | 24702  | 12.268  | 20.922   |
| 2     | 16.690    | 2164882 | 93365  | 87.732  | 79.078   |
| Total |           | 2467599 | 118067 | 100.000 | 100.000  |



# ==== Shimadzu LCsolution Analysis Report ====

Acquired by : LC User  
 Sample Name : DVR04128RAC D1  
 Sample ID : DVR04128RAC D1  
 Tray# : 1  
 Vial # : 1  
 Injection Volume : 3 uL  
 Data File Name : DVR04128RAC D1\_7182016\_1401 PM\_4.lcd  
 Method File Name : col3\_2isoiPA\_30min\_1ML\_254and210.lcm  
 Batch File Name : DMM.lcb  
 Report File Name : Default.lcr  
 Data Acquired : 7/18/2016 3:52:45 PM  
 Data Processed : 7/18/2016 4:22:47 PM

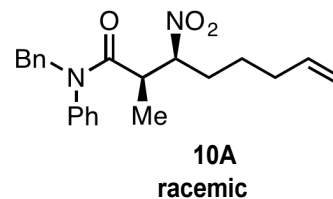

## <Chromatogram>

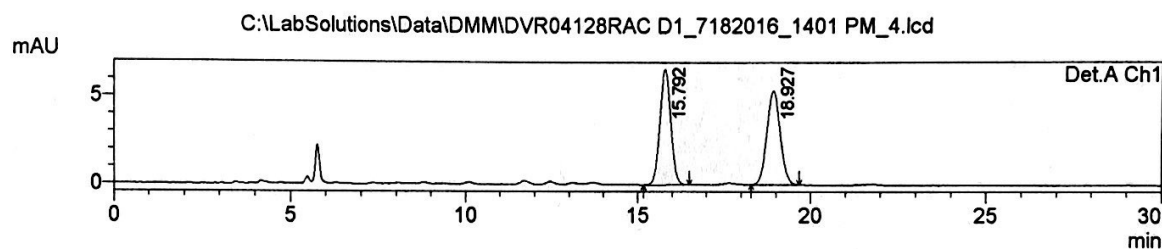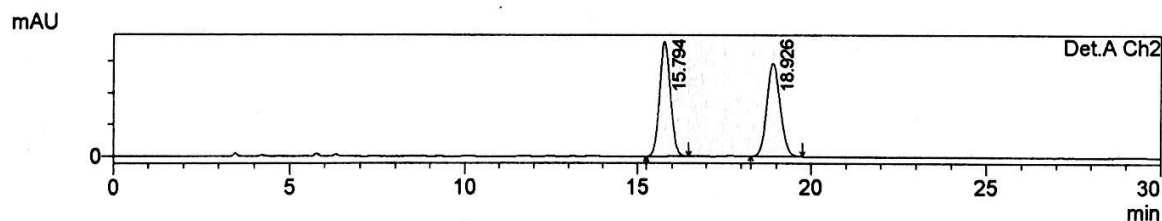

- 1 Det.A Ch1/254nm
- 2 Det.A Ch2/210nm

PeakTable

Detector A Ch1 254nm

| Peak#        | Ret. Time | Area          | Height       | Area %         | Height %       |
|--------------|-----------|---------------|--------------|----------------|----------------|
| 1            | 15.792    | 145324        | 6641         | 50.250         | 55.124         |
| 2            | 18.927    | 143877        | 5406         | 49.750         | 44.876         |
| <b>Total</b> |           | <b>289200</b> | <b>12047</b> | <b>100.000</b> | <b>100.000</b> |

PeakTable

Detector A Ch2 210nm

| Peak#        | Ret. Time | Area           | Height        | Area %         | Height %       |
|--------------|-----------|----------------|---------------|----------------|----------------|
| 1            | 15.794    | 3980250        | 182070        | 50.162         | 55.173         |
| 2            | 18.926    | 3954586        | 147927        | 49.838         | 44.827         |
| <b>Total</b> |           | <b>7934836</b> | <b>329997</b> | <b>100.000</b> | <b>100.000</b> |

## ==== Shimadzu LCsolution Analysis Report ====

C:\LabSolutions\Data\DMM\DVR04128 D1\_7182016\_1401 PM\_8.lcd  
 Acquired by : LC User  
 Sample Name : DVR04128 D1  
 Sample ID : DVR04128 D1  
 Tray# : 1  
 Vial # : 2  
 Injection Volume : 3 uL  
 Data File Name : DVR04128 D1\_7182016\_1401 PM\_8.lcd  
 Method File Name : col3\_2isoiPA\_30min\_1ML\_254and210.lcm  
 Batch File Name : DMM.lcb  
 Report File Name : Default.lcr  
 Data Acquired : 7/18/2016 5:03:45 PM  
 Data Processed : 7/18/2016 5:33:46 PM

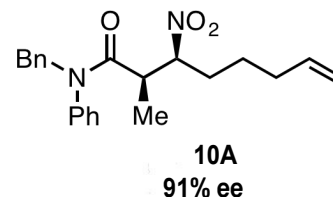

### <Chromatogram>

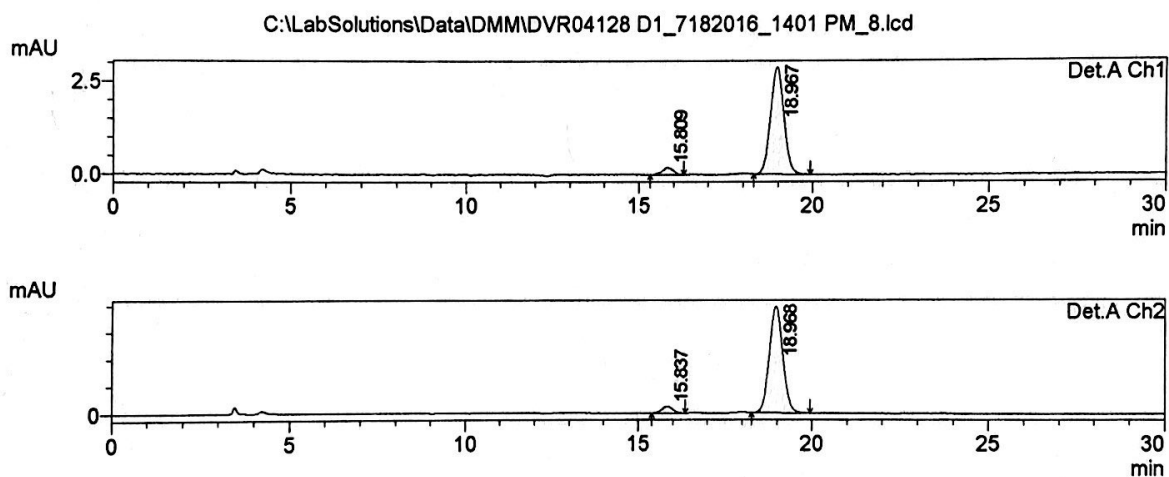

PeakTable

Detector A Ch1 254nm

| Peak# | Ret. Time | Area  | Height | Area %  | Height % |
|-------|-----------|-------|--------|---------|----------|
| 1     | 15.809    | 4289  | 192    | 5.271   | 6.220    |
| 2     | 18.967    | 77076 | 2897   | 94.729  | 93.780   |
| Total |           | 81364 | 3089   | 100.000 | 100.000  |

PeakTable

Detector A Ch2 210nm

| Peak# | Ret. Time | Area    | Height | Area %  | Height % |
|-------|-----------|---------|--------|---------|----------|
| 1     | 15.837    | 104022  | 4891   | 4.655   | 5.792    |
| 2     | 18.968    | 2130706 | 79554  | 95.345  | 94.208   |
| Total |           | 2234727 | 84445  | 100.000 | 100.000  |

## ==== Shimadzu LCsolution Analysis Report ====

C:\LabSolutions\Data\DMMDVR04128RAC ANTI 2\_7192016\_1355 PM\_2.lcd  
 Acquired by : LC User  
 Sample Name : DVR04128RAC ANTI 2  
 Sample ID : DVR04128RAC ANTI 2  
 Tray# : 1  
 Vail # : 2  
 Injection Volume : 1 uL  
 Data File Name : DVR04128RAC ANTI 2\_7192016\_1355 PM\_2.lcd  
 Method File Name : col2\_0.8isoIPA\_45min\_1ML\_220and210.lcm  
 Batch File Name : DMM.lcb  
 Report File Name : Default.lcr  
 Data Acquired : 7/19/2016 2:25:58 PM  
 Data Processed : 7/19/2016 3:11:00 PM

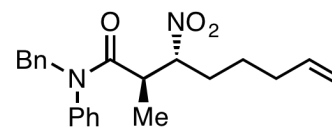

**10B**  
racemic

### <Chromatogram>

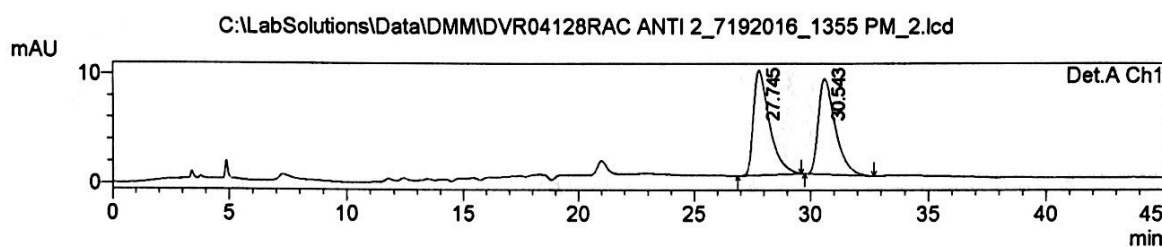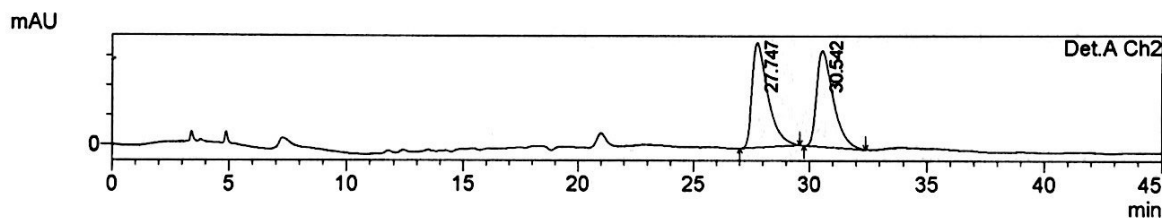

- 1 Det.A Ch1/220nm  
 2 Det.A Ch2/210nm

PeakTable

Detector A Ch1 220nm

| Peak# | Ret. Time | Area   | Height | Area %  | Height % |
|-------|-----------|--------|--------|---------|----------|
| 1     | 27.745    | 457217 | 9571   | 51.168  | 52.288   |
| 2     | 30.543    | 436342 | 8733   | 48.832  | 47.712   |
| Total |           | 893559 | 18304  | 100.000 | 100.000  |

PeakTable

Detector A Ch2 210nm

| Peak# | Ret. Time | Area    | Height | Area %  | Height % |
|-------|-----------|---------|--------|---------|----------|
| 1     | 27.747    | 851750  | 17849  | 51.218  | 52.190   |
| 2     | 30.542    | 811240  | 16351  | 48.782  | 47.810   |
| Total |           | 1662990 | 34200  | 100.000 | 100.000  |

## ==== Shimadzu LCsolution Analysis Report ====

Acquired by : C:\LabSolutions\Data\DMM\DVR04128 ANTI D2\_7192016\_1355 PM\_6.lcd  
 : LC User  
 Sample Name : DVR04128 ANTI D2  
 Sample ID : DVR04128 ANTI D2  
 Tray# : 1  
 Vail # : 3  
 Injection Volume : 1 uL  
 Data File Name : DVR04128 ANTI D2\_7192016\_1355 PM\_6.lcd  
 Method File Name : col2\_0.8isoiPA\_45min\_1ML\_220and210.lcm  
 Batch File Name : DMM.lcb  
 Report File Name : Default.lcr  
 Data Acquired : 7/19/2016 3:51:55 PM  
 Data Processed : 7/19/2016 4:36:58 PM

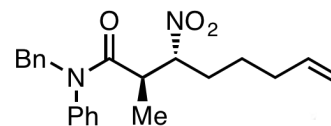

**10B**  
79% ee

### <Chromatogram>

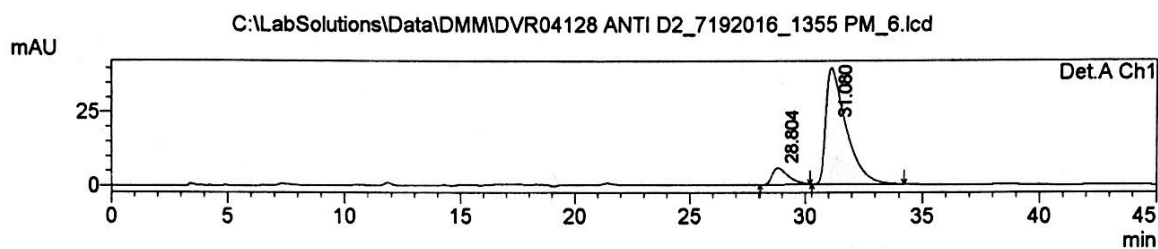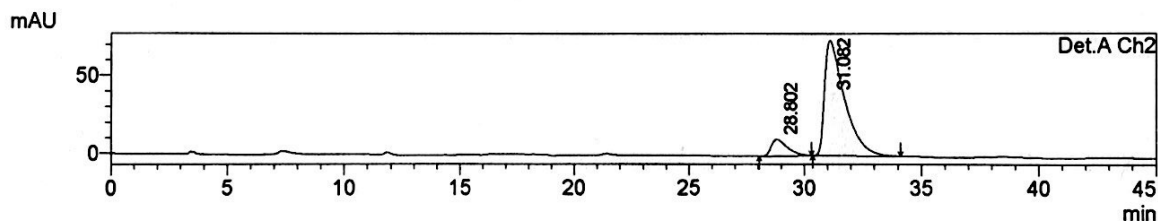

- 1 Det.A Ch1/220nm
- 2 Det.A Ch2/210nm

PeakTable

Detector A Ch1 220nm

| Peak# | Ret. Time | Area    | Height | Area %  | Height % |
|-------|-----------|---------|--------|---------|----------|
| 1     | 28.804    | 272983  | 5675   | 10.343  | 12.534   |
| 2     | 31.080    | 2366354 | 39606  | 89.657  | 87.466   |
| Total |           | 2639337 | 45281  | 100.000 | 100.000  |

PeakTable

Detector A Ch2 210nm

| Peak# | Ret. Time | Area    | Height | Area %  | Height % |
|-------|-----------|---------|--------|---------|----------|
| 1     | 28.802    | 521687  | 10686  | 10.578  | 12.586   |
| 2     | 31.082    | 4409944 | 74216  | 89.422  | 87.414   |
| Total |           | 4931631 | 84902  | 100.000 | 100.000  |

## ==== Shimadzu LCsolution Analysis Report ====

Acquired by : C:\LabSolutions\Data\DMM\DVR04140 RAC SYN\_7202016\_1046 AM\_2.lcd  
 : LC User  
 Sample Name : DVR04140 RAC SYN  
 Sample ID : DVR04140 RAC SYN  
 Tray# : 1  
 Vial # : 4  
 Injection Volume : 3 uL  
 Data File Name : DVR04140 RAC SYN\_7202016\_1046 AM\_2.lcd  
 Method File Name : col1\_5isoiPA\_15min\_1ML\_220and210.lcm  
 Batch File Name : DMM.lcb  
 Report File Name : Default.lcr  
 Data Acquired : 7/20/2016 11:02:13 AM  
 Data Processed : 7/20/2016 11:17:14 AM

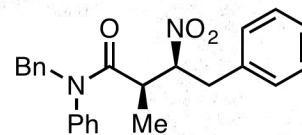

**11A**  
racemic

### <Chromatogram>

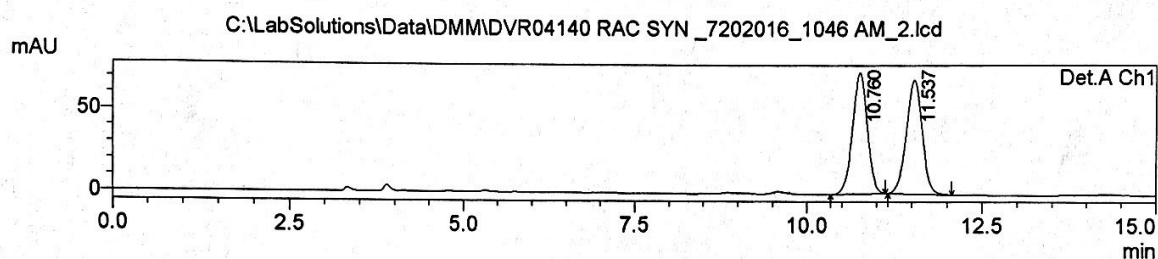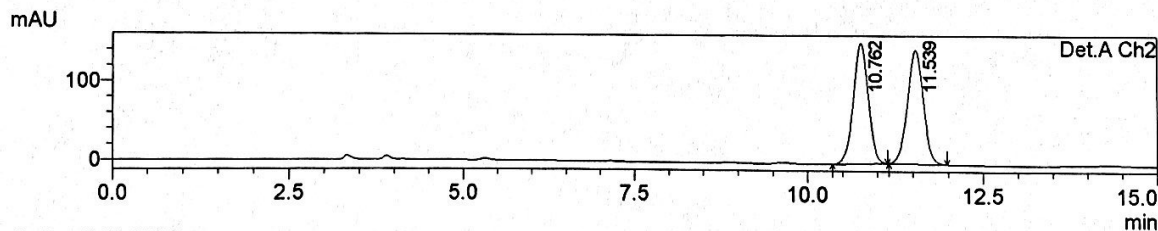

1 Det.A Ch1/220nm  
 2 Det.A Ch2/210nm

PeakTable

Detector A Ch1 220nm

| Peak# | Ret. Time | Area    | Height | Area %  | Height % |
|-------|-----------|---------|--------|---------|----------|
| 1     | 10.760    | 1093144 | 74436  | 50.032  | 51.502   |
| 2     | 11.537    | 1091760 | 70093  | 49.968  | 48.498   |
| Total |           | 2184904 | 144529 | 100.000 | 100.000  |

PeakTable

Detector A Ch2 210nm

| Peak# | Ret. Time | Area    | Height | Area %  | Height % |
|-------|-----------|---------|--------|---------|----------|
| 1     | 10.762    | 2254340 | 153508 | 50.098  | 51.537   |
| 2     | 11.539    | 2245525 | 144353 | 49.902  | 48.463   |
| Total |           | 4499866 | 297861 | 100.000 | 100.000  |

# ==== Shimadzu LCsolution Analysis Report ====

C:\LabSolutions\Data\DMM\DVR04140 SYN 1\_7202016\_1046 AM\_6.lcd  
 Acquired by : LC User  
 Sample Name : DVR04140 SYN 1  
 Sample ID : DVR04140 SYN 1  
 Tray# : 1  
 Vial # : 5  
 Injection Volume : 3 uL  
 Data File Name : DVR04140 SYN 1\_7202016\_1046 AM\_6.lcd  
 Method File Name : col1\_5isoiPA\_15min\_1ML\_220and210.lcm  
 Batch File Name : DMM.lcb  
 Report File Name : Default.lcr  
 Data Acquired : 7/20/2016 11:43:09 AM  
 Data Processed : 7/20/2016 11:58:11 AM

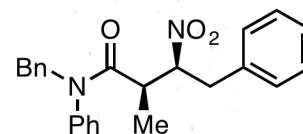

11A

87% ee

## <Chromatogram>

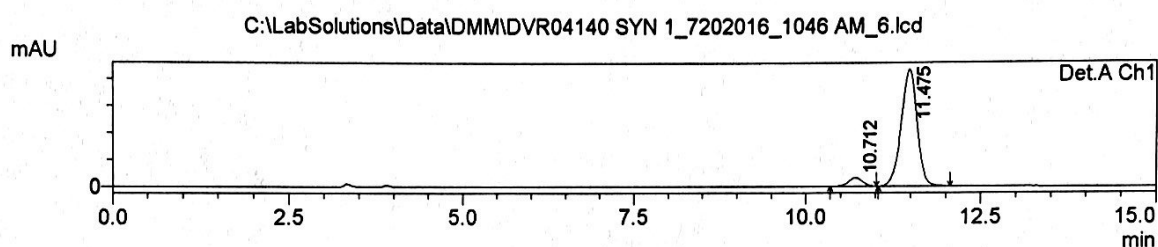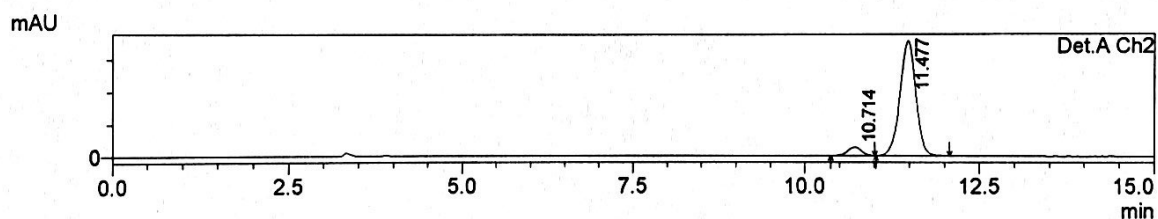

- 1 Det.A Ch1/220nm
- 2 Det.A Ch2/210nm

### PeakTable

#### Detector A Ch1 220nm

| Peak# | Ret. Time | Area    | Height | Area %  | Height % |
|-------|-----------|---------|--------|---------|----------|
| 1     | 10.712    | 92346   | 6486   | 6.370   | 6.968    |
| 2     | 11.475    | 1357267 | 86586  | 93.630  | 93.032   |
| Total |           | 1449613 | 93072  | 100.000 | 100.000  |

### PeakTable

#### Detector A Ch2 210nm

| Peak# | Ret. Time | Area    | Height | Area %  | Height % |
|-------|-----------|---------|--------|---------|----------|
| 1     | 10.714    | 189162  | 13361  | 6.329   | 6.961    |
| 2     | 11.477    | 2799668 | 178582 | 93.671  | 93.039   |
| Total |           | 2988829 | 191943 | 100.000 | 100.000  |

# ==== Shimadzu LCsolution Analysis Report ====

C:\LabSolutions\Data\DMM\DVR04140RAC ANTI\_7202016\_1046 AM\_10.lcd  
 Acquired by : LC User  
 Sample Name : DVR04140RAC ANTI  
 Sample ID : DVR04140RAC ANTI  
 Tray# : 1  
 Vial # : 6  
 Injection Volume : 3 uL  
 Data File Name : DVR04140RAC ANTI\_7202016\_1046 AM\_10.lcd  
 Method File Name : col1\_5isoiPA\_30min\_1ML\_254and210.lcm  
 Batch File Name : DMM.lcb  
 Report File Name : Default.lcr  
 Data Acquired : 7/20/2016 12:39:06 PM  
 Data Processed : 7/20/2016 1:09:06 PM

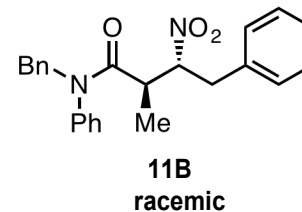

## <Chromatogram>

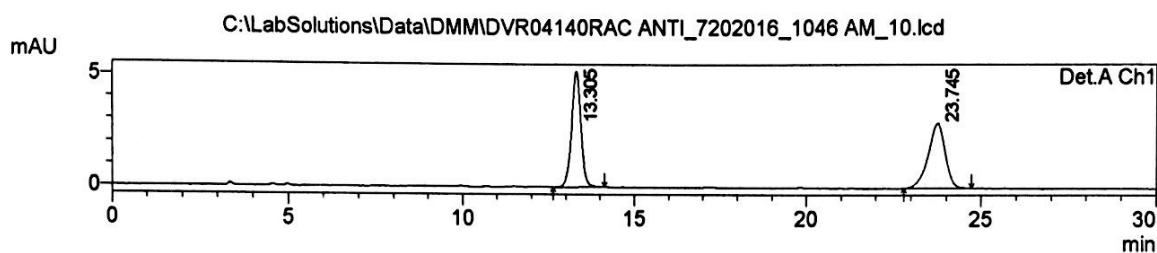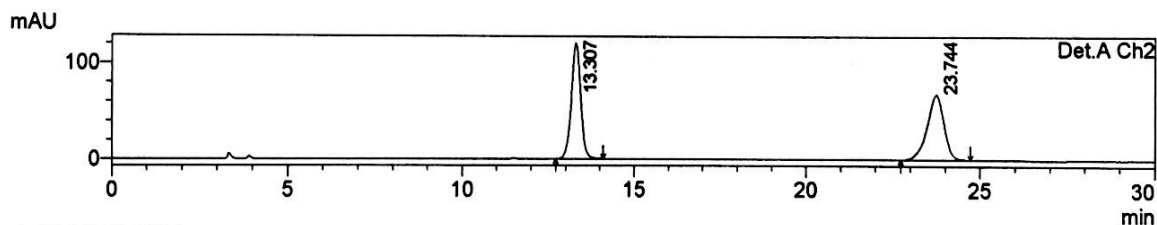

- 1 Det.A Ch1/254nm
- 2 Det.A Ch2/210nm

PeakTable

Detector A Ch1 254nm

| Peak# | Ret. Time | Area   | Height | Area %  | Height % |
|-------|-----------|--------|--------|---------|----------|
| 1     | 13.305    | 97959  | 5205   | 49.970  | 64.063   |
| 2     | 23.745    | 98077  | 2920   | 50.030  | 35.937   |
| Total |           | 196036 | 8124   | 100.000 | 100.000  |

PeakTable

Detector A Ch2 210nm

| Peak# | Ret. Time | Area    | Height | Area %  | Height % |
|-------|-----------|---------|--------|---------|----------|
| 1     | 13.307    | 2280277 | 121019 | 50.026  | 64.053   |
| 2     | 23.744    | 2277909 | 67917  | 49.974  | 35.947   |
| Total |           | 4558186 | 188936 | 100.000 | 100.000  |

## ==== Shimadzu LCsolution Analysis Report ====

C:\LabSolutions\Data\DMM\DVR04140 RAC ANTI 1\_7202016\_1046 AM\_14.lcd  
 Acquired by : LC User  
 Sample Name : DVR04140 RAC ANTI 1  
 Sample ID : DVR04140 RAC ANTI 1  
 Tray# : 1  
 Vail # : 7  
 Injection Volume : 3 uL  
 Data File Name : DVR04140 RAC ANTI 1\_7202016\_1046 AM\_14.lcd  
 Method File Name : col1\_5isoiPA\_30min\_1ML\_254and210.lcm  
 Batch File Name : DMM.lcb  
 Report File Name : Default.lcr  
 Data Acquired : 7/20/2016 1:50:02 PM  
 Data Processed : 7/20/2016 2:20:04 PM

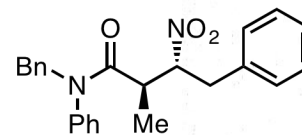

**11B**  
68% ee

### <Chromatogram>

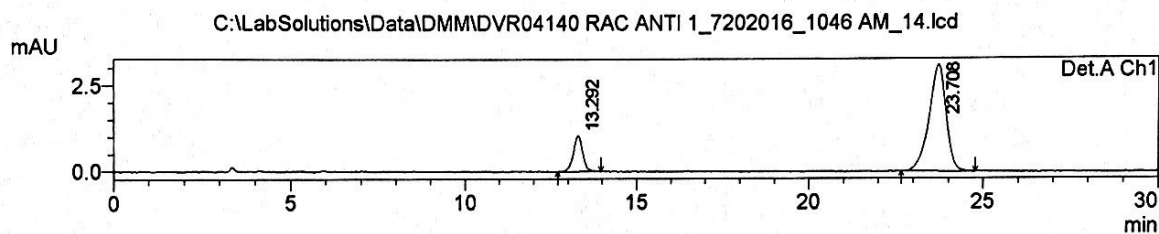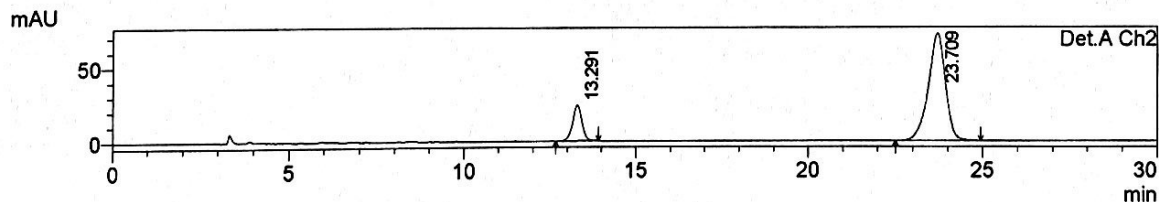

1 Det.A Ch1/254nm  
 2 Det.A Ch2/210nm

PeakTable

Detector A Ch1 254nm

| Peak# | Ret. Time | Area   | Height | Area %  | Height % |
|-------|-----------|--------|--------|---------|----------|
| 1     | 13.292    | 20287  | 1051   | 16.159  | 25.144   |
| 2     | 23.708    | 105258 | 3128   | 83.841  | 74.856   |
| Total |           | 125544 | 4179   | 100.000 | 100.000  |

PeakTable

Detector A Ch2 210nm

| Peak# | Ret. Time | Area    | Height | Area %  | Height % |
|-------|-----------|---------|--------|---------|----------|
| 1     | 13.291    | 454382  | 24182  | 15.632  | 24.942   |
| 2     | 23.709    | 2452271 | 72770  | 84.368  | 75.058   |
| Total |           | 2906652 | 96953  | 100.000 | 100.000  |



## ==== Shimadzu LCsolution Analysis Report ====

Acquired by : LC User  
 Sample Name : DVR04148 RAC D1  
 Sample ID : DVR04148 RAC D1  
 Tray# : 1  
 Vail # : 2  
 Injection Volume : 1 uL  
 Data File Name : DVR04148 RAC D1\_7282016\_1137 AM\_39.lcd  
 Method File Name : col1\_3isoiPA\_45min\_1ML\_220and210.lcm  
 Batch File Name : DMM.lcb  
 Report File Name : Default.lcr  
 Data Acquired : 7/29/2016 3:28:24 AM  
 Data Processed : 7/29/2016 4:13:27 AM

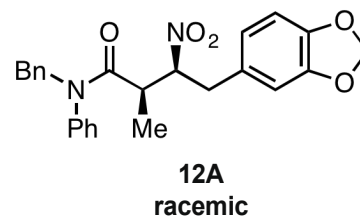

### <Chromatogram>

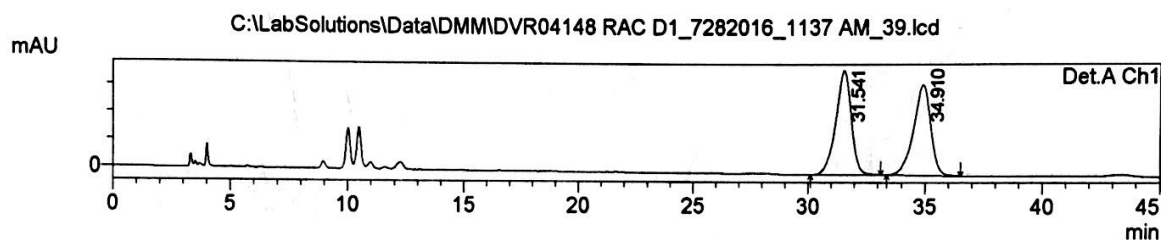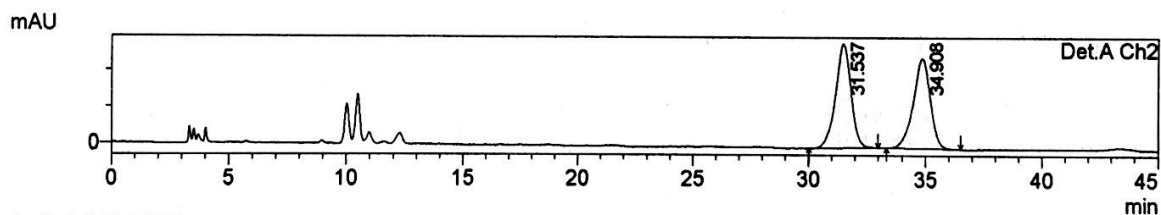

- 1 Det.A Ch1/220nm
- 2 Det.A Ch2/210nm

PeakTable

Detector A Ch1 220nm

| Peak# | Ret. Time | Area   | Height | Area %  | Height % |
|-------|-----------|--------|--------|---------|----------|
| 1     | 31.541    | 351187 | 7591   | 51.175  | 53.528   |
| 2     | 34.910    | 335062 | 6591   | 48.825  | 46.472   |
| Total |           | 686249 | 14182  | 100.000 | 100.000  |

PeakTable

Detector A Ch2 210nm

| Peak# | Ret. Time | Area    | Height | Area %  | Height % |
|-------|-----------|---------|--------|---------|----------|
| 1     | 31.537    | 659926  | 14299  | 51.196  | 53.593   |
| 2     | 34.908    | 629093  | 12382  | 48.804  | 46.407   |
| Total |           | 1289019 | 26681  | 100.000 | 100.000  |

## ==== Shimadzu LCsolution Analysis Report ====

C:\LabSolutions\Data\DMM\DVR04148 D1\_7282016\_1137 AM\_43.lcd  
 Acquired by : LC User  
 Sample Name : DVR04148 D1  
 Sample ID : DVR04148 D1  
 Tray# : 1  
 Vial # : 3  
 Injection Volume : 1 uL  
 Data File Name : DVR04148 D1\_7282016\_1137 AM\_43.lcd  
 Method File Name : col1\_3isoiPA\_45min\_1ML\_220and210.lcm  
 Batch File Name : DMM.lcb  
 Report File Name : Default.lcr  
 Data Acquired : 7/29/2016 5:09:21 AM  
 Data Processed : 7/29/2016 5:54:23 AM

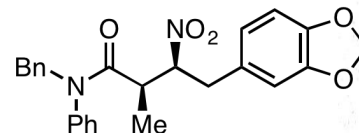

**12A**  
**89% ee**

### <Chromatogram>

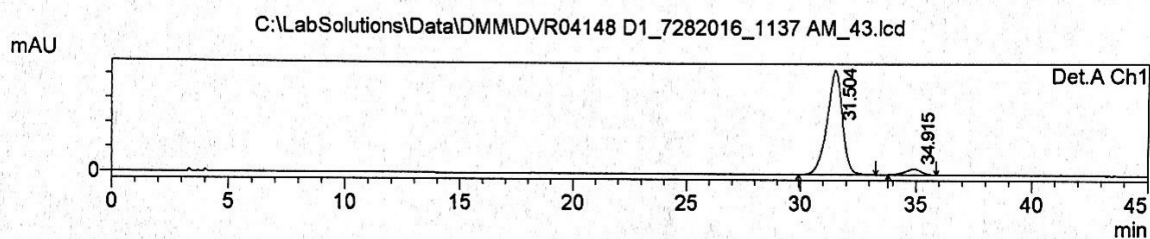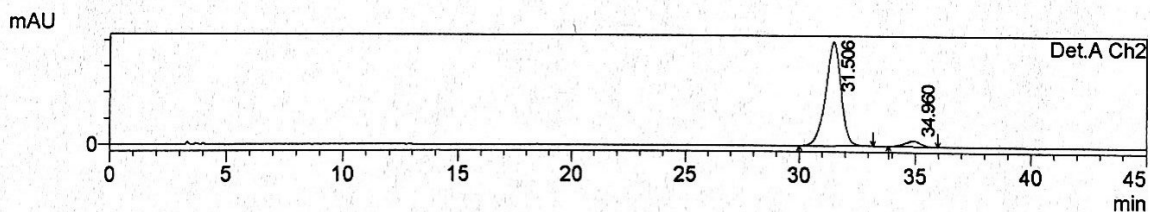

1 Det.A Ch1/220nm  
 2 Det.A Ch2/210nm

PeakTable

Detector A Ch1 220nm

| Peak# | Ret. Time | Area    | Height | Area %  | Height % |
|-------|-----------|---------|--------|---------|----------|
| 1     | 31.504    | 1984056 | 42980  | 94.535  | 94.787   |
| 2     | 34.915    | 114704  | 2364   | 5.465   | 5.213    |
| Total |           | 2098760 | 45344  | 100.000 | 100.000  |

PeakTable

Detector A Ch2 210nm

| Peak# | Ret. Time | Area    | Height | Area %  | Height % |
|-------|-----------|---------|--------|---------|----------|
| 1     | 31.506    | 3721912 | 80347  | 94.562  | 94.757   |
| 2     | 34.960    | 214020  | 4446   | 5.438   | 5.243    |
| Total |           | 3935932 | 84793  | 100.000 | 100.000  |

# ==== Shimadzu LCsolution Analysis Report ====

Acquired by : C:\LabSolutions\Data\DMM\DVR04148 RAC D2\_7292016\_1211 PM\_2.lcd  
 Sample Name : LC User  
 Sample ID : DVR04148 RAC D2  
 Tray# : DVR04148 RAC D2  
 Vial # : 1  
 Injection Volume : 2  
 Data File Name : 1 uL  
 Method File Name : DVR04148 RAC D2\_7292016\_1211 PM\_2.lcd  
 Batch File Name : col2\_3isoiPA\_45min\_1ML\_220and210.lcm  
 Report File Name : DMM.lcb  
 Data Acquired : Default.lcr  
 Data Processed : 7/29/2016 12:57:24 PM  
 Data Processed : 7/29/2016 1:42:23 PM

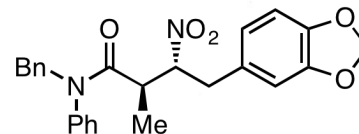

**12B**  
racemic

## <Chromatogram>

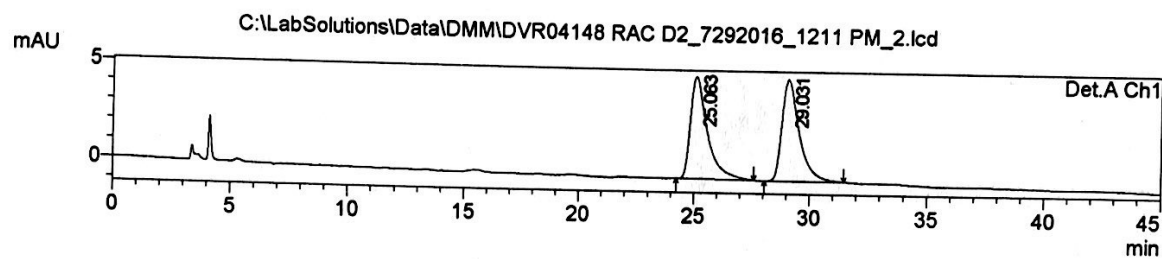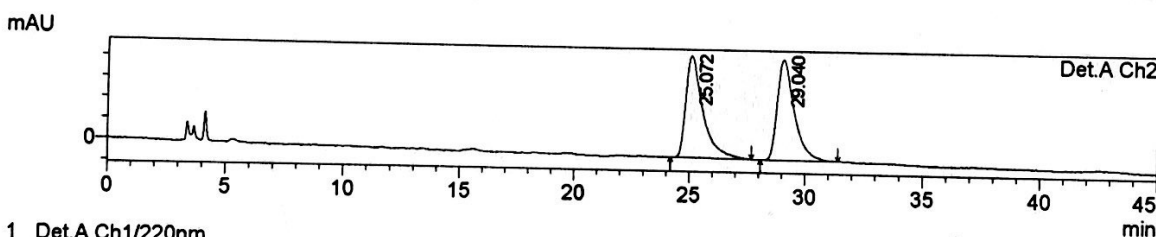

1 Det.A Ch1/220nm  
2 Det.A Ch2/210nm

PeakTable

Detector A Ch1 220nm

| Peak# | Ret. Time | Area   | Height | Area %  | Height % |
|-------|-----------|--------|--------|---------|----------|
| 1     | 25.063    | 269990 | 5265   | 49.936  | 50.107   |
| 2     | 29.031    | 270677 | 5242   | 50.064  | 49.893   |
| Total |           | 540666 | 10507  | 100.000 | 100.000  |

PeakTable

Detector A Ch2 210nm

| Peak# | Ret. Time | Area   | Height | Area %  | Height % |
|-------|-----------|--------|--------|---------|----------|
| 1     | 25.072    | 506479 | 9808   | 50.801  | 50.336   |
| 2     | 29.040    | 490498 | 9677   | 49.199  | 49.664   |
| Total |           | 996977 | 19485  | 100.000 | 100.000  |

# ==== Shimadzu LCsolution Analysis Report ====

C:\LabSolutions\Data\DMMDVR04148 D2\_7292016\_1211 PM\_1.lcd  
 Acquired by : LC User  
 Sample Name : DVR04148 D2  
 Sample ID : DVR04148 D2  
 Tray# : 1  
 Vail # : 3  
 Injection Volume : 1 uL  
 Data File Name : DVR04148 D2\_7292016\_1211 PM\_1.lcd  
 Method File Name : col2\_3isoiPA\_45min\_1ML\_220and210.lcm  
 Batch File Name : DMM.lcb  
 Report File Name : Default.lcr  
 Data Acquired : 7/29/2016 2:39:22 PM  
 Data Processed : 7/29/2016 3:24:23 PM

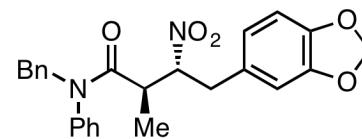

**12B**  
 81% ee

## <Chromatogram>

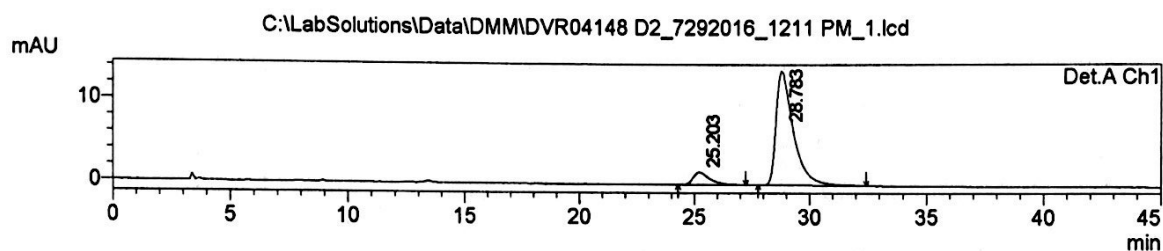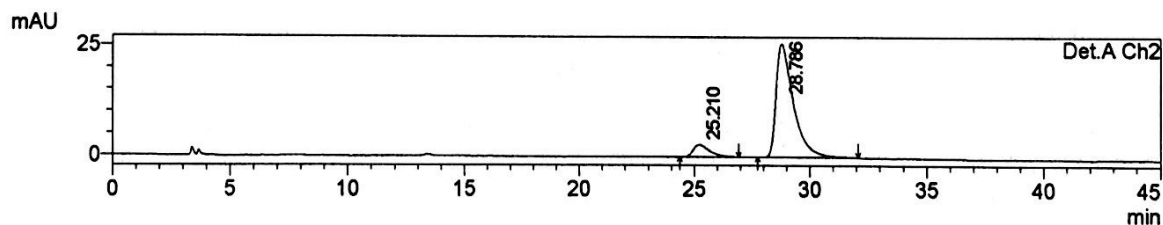

- 1 Det.A Ch1/220nm
- 2 Det.A Ch2/210nm

PeakTable

Detector A Ch1 220nm

| Peak# | Ret. Time | Area   | Height | Area %  | Height % |
|-------|-----------|--------|--------|---------|----------|
| 1     | 25.203    | 78122  | 1532   | 9.695   | 9.909    |
| 2     | 28.783    | 727654 | 13928  | 90.305  | 90.091   |
| Total |           | 805775 | 15460  | 100.000 | 100.000  |

PeakTable

Detector A Ch2 210nm

| Peak# | Ret. Time | Area    | Height | Area %  | Height % |
|-------|-----------|---------|--------|---------|----------|
| 1     | 25.210    | 141313  | 2831   | 9.455   | 9.829    |
| 2     | 28.786    | 1353283 | 25973  | 90.545  | 90.171   |
| Total |           | 1494596 | 28804  | 100.000 | 100.000  |



## ==== Shimadzu LCsolution Analysis Report ====

Acquired by : C:\LabSolutions\Data\DMM\DVR04167 D1 RAC\_8212016\_1521 PM\_1.lcd  
 : LC User  
 Sample Name : DVR04167 D1 RAC  
 Sample ID : DVR04167 D1 RAC  
 Tray# : 1  
 Vail # : 1  
 Injection Volume : 7 uL  
 Data File Name : DVR04167 D1 RAC\_8212016\_1521 PM\_1.lcd  
 Method File Name : col2\_1isoiPA\_45min\_1ML\_220 and210.lcm  
 Batch File Name : DMM.lcb  
 Report File Name : Default.lcr  
 Data Acquired : 8/21/2016 4:07:01 PM  
 Data Processed : 8/21/2016 4:52:04 PM

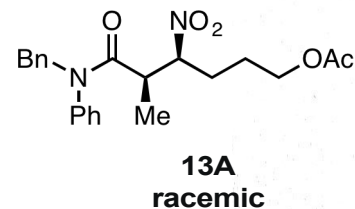

### <Chromatogram>

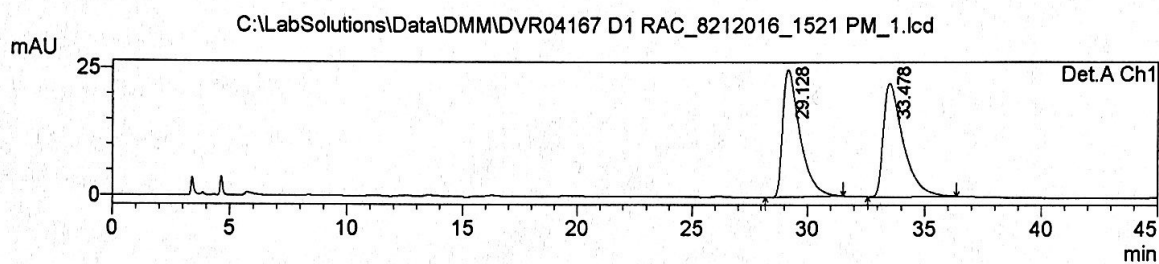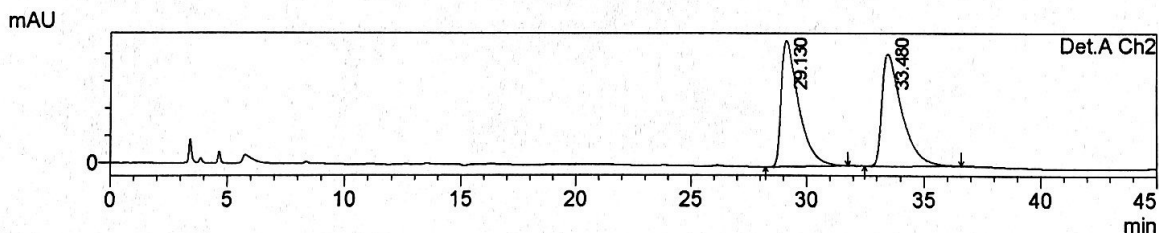

- 1 Det.A Ch1/220nm
- 2 Det.A Ch2/210nm

PeakTable

Detector A Ch1 220nm

| Peak# | Ret. Time | Area    | Height | Area %  | Height % |
|-------|-----------|---------|--------|---------|----------|
| 1     | 29.128    | 1305476 | 25180  | 49.826  | 52.953   |
| 2     | 33.478    | 1314597 | 22372  | 50.174  | 47.047   |
| Total |           | 2620073 | 47552  | 100.000 | 100.000  |

PeakTable

Detector A Ch2 210nm

| Peak# | Ret. Time | Area    | Height | Area %  | Height % |
|-------|-----------|---------|--------|---------|----------|
| 1     | 29.130    | 2424328 | 46353  | 49.960  | 52.975   |
| 2     | 33.480    | 2428165 | 41147  | 50.040  | 47.025   |
| Total |           | 4852493 | 87501  | 100.000 | 100.000  |

## ==== Shimadzu LCsolution Analysis Report ====

C:\LabSolutions\Data\DMM\DVR04167 D1\_8212016\_1521 PM\_5.lcd  
 Acquired by : LC User  
 Sample Name : DVR04167 D1  
 Sample ID : DVR04167 D1  
 Tray# : 1  
 Vial # : 2  
 Injection Volume : 2 uL  
 Data File Name : DVR04167 D1\_8212016\_1521 PM\_5.lcd  
 Method File Name : col2\_1isoiPA\_45min\_1ML\_220 and210.lcm  
 Batch File Name : DMM.lcb  
 Report File Name : Default.lcr  
 Data Acquired : 8/21/2016 5:47:58 PM  
 Data Processed : 8/21/2016 6:32:59 PM

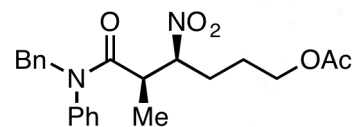

**13A**  
**91% ee**

### <Chromatogram>

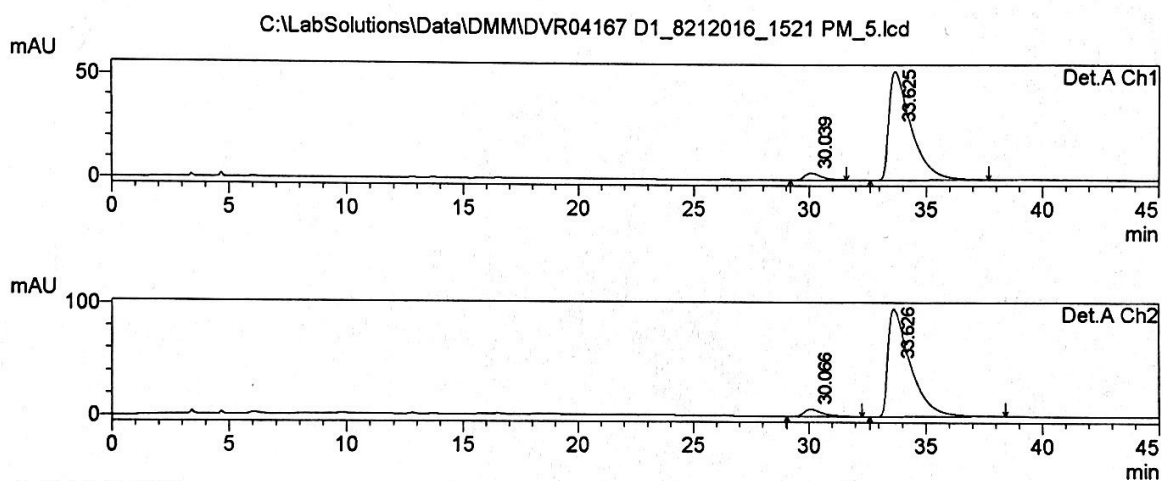

1 Det.A Ch1/220nm  
 2 Det.A Ch2/210nm

PeakTable

Detector A Ch1 220nm

| Peak# | Ret. Time | Area    | Height | Area %  | Height % |
|-------|-----------|---------|--------|---------|----------|
| 1     | 30.039    | 173900  | 3441   | 4.744   | 6.115    |
| 2     | 33.625    | 3491407 | 52837  | 95.256  | 93.885   |
| Total |           | 3665307 | 56278  | 100.000 | 100.000  |

PeakTable

Detector A Ch2 210nm

| Peak# | Ret. Time | Area    | Height | Area %  | Height % |
|-------|-----------|---------|--------|---------|----------|
| 1     | 30.066    | 365998  | 6533   | 5.361   | 6.313    |
| 2     | 33.626    | 6460729 | 96957  | 94.639  | 93.687   |
| Total |           | 6826726 | 103490 | 100.000 | 100.000  |

## ==== Shimadzu LCsolution Analysis Report ====

Acquired by : LC User  
 Sample Name : DVR04167 D2 RAC  
 Sample ID : DVR04167 D2 RAC  
 Tray# : 1  
 Vial # : 3  
 Injection Volume : 3 uL  
 Data File Name : DVR04167 D2 RAC\_8212016\_1521 PM\_9.lcd  
 Method File Name : col1\_05isoiPA\_30min\_1ml\_254and210.lcm  
 Batch File Name : DMM.lcb  
 Report File Name : Default.lcr  
 Data Acquired : 8/21/2016 7:13:54 PM  
 Data Processed : 8/21/2016 7:43:54 PM

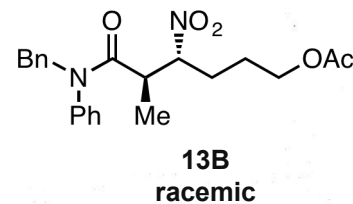

### <Chromatogram>

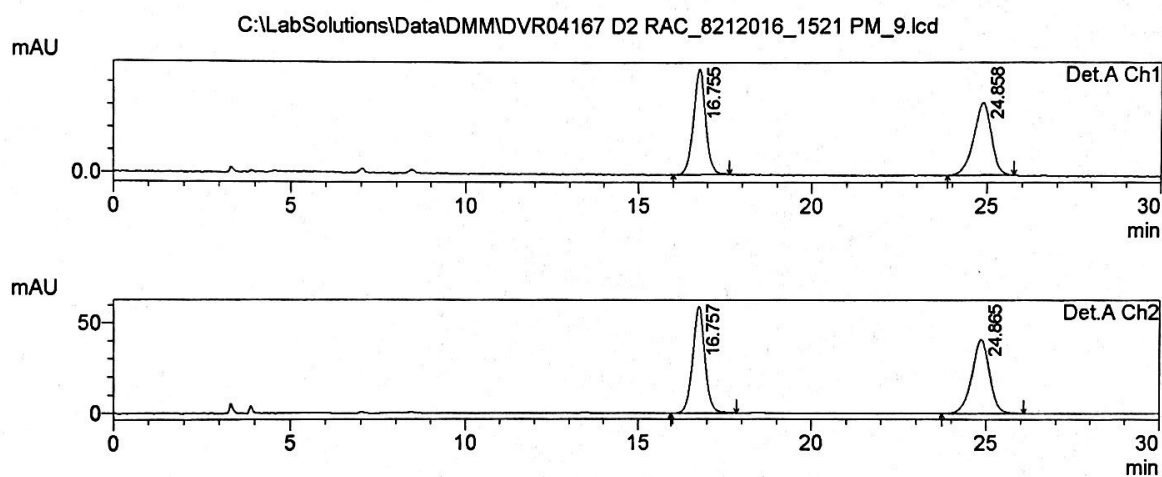

PeakTable

Detector A Ch1 254nm

| Peak# | Ret. Time | Area   | Height | Area %  | Height % |
|-------|-----------|--------|--------|---------|----------|
| 1     | 16.755    | 56733  | 2346   | 50.344  | 59.378   |
| 2     | 24.858    | 55958  | 1605   | 49.656  | 40.622   |
| Total |           | 112690 | 3951   | 100.000 | 100.000  |

PeakTable

Detector A Ch2 210nm

| Peak# | Ret. Time | Area    | Height | Area %  | Height % |
|-------|-----------|---------|--------|---------|----------|
| 1     | 16.757    | 1449925 | 59478  | 50.026  | 59.132   |
| 2     | 24.865    | 1448408 | 41106  | 49.974  | 40.868   |
| Total |           | 2898332 | 100584 | 100.000 | 100.000  |

## ==== Shimadzu LCsolution Analysis Report ====

C:\LabSolutions\Data\DMM\DVR04167 D2\_8212016\_1521 PM\_13.lcd  
 Acquired by : LC User  
 Sample Name : DVR04167 D2  
 Sample ID : DVR04167 D2  
 Tray# : 1  
 Vial # : 4  
 Injection Volume : 3 uL  
 Data File Name : DVR04167 D2\_8212016\_1521 PM\_13.lcd  
 Method File Name : col1\_05isoiPA\_30min\_1ml\_254and210.lcm  
 Batch File Name : DMM.lcb  
 Report File Name : Default.lcr  
 Data Acquired : 8/21/2016 8:24:48 PM  
 Data Processed : 8/21/2016 8:54:51 PM

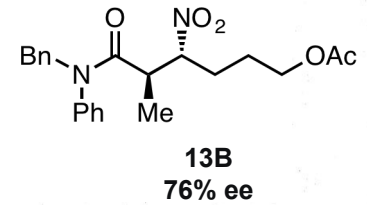

### <Chromatogram>

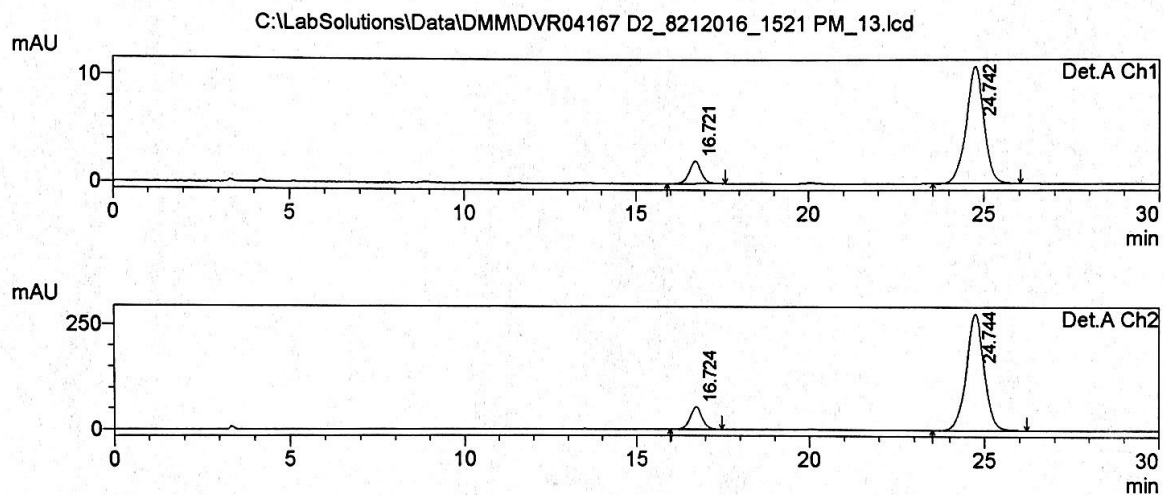

PeakTable

Detector A Ch1 254nm

| Peak# | Ret. Time | Area   | Height | Area %  | Height % |
|-------|-----------|--------|--------|---------|----------|
| 1     | 16.721    | 50971  | 2127   | 11.753  | 16.262   |
| 2     | 24.742    | 382709 | 10952  | 88.247  | 83.738   |
| Total |           | 433680 | 13080  | 100.000 | 100.000  |

PeakTable

Detector A Ch2 210nm

| Peak# | Ret. Time | Area     | Height | Area %  | Height % |
|-------|-----------|----------|--------|---------|----------|
| 1     | 16.724    | 1288866  | 53750  | 11.620  | 16.189   |
| 2     | 24.744    | 9802457  | 278264 | 88.380  | 83.811   |
| Total |           | 11091323 | 332014 | 100.000 | 100.000  |



## ==== Shimadzu LCsolution Analysis Report ====

Acquired by : LC User  
 Sample Name : DVR04186B RAC D1  
 Sample ID : DVR04186B RAC D1  
 Tray# : 1  
 Vial # : 1  
 Injection Volume : 3 uL  
 Data File Name : DVR04186B RAC D1\_9182016\_1754 PM\_2.lcd  
 Method File Name : col1\_5isoiPA\_60min\_1ML\_220and210.lcm  
 Batch File Name : DMM.lcb  
 Report File Name : Default.lcr  
 Data Acquired : 9/18/2016 6:25:08 PM  
 Data Processed : 9/18/2016 7:25:09 PM

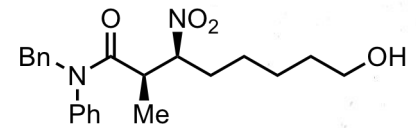

**14A**  
racemic

### <Chromatogram>

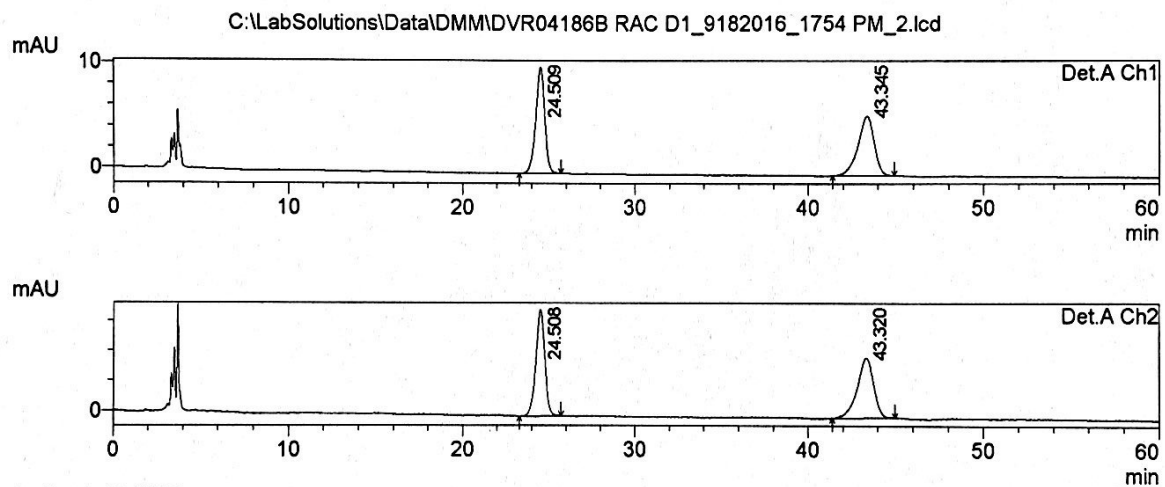

PeakTable

Detector A Ch1 220nm

| Peak# | Ret. Time | Area   | Height | Area %  | Height % |
|-------|-----------|--------|--------|---------|----------|
| 1     | 24.509    | 366519 | 10125  | 49.929  | 64.058   |
| 2     | 43.345    | 367559 | 5681   | 50.071  | 35.942   |
| Total |           | 734078 | 15806  | 100.000 | 100.000  |

PeakTable

Detector A Ch2 210nm

| Peak# | Ret. Time | Area    | Height | Area %  | Height % |
|-------|-----------|---------|--------|---------|----------|
| 1     | 24.508    | 643739  | 17786  | 49.731  | 64.074   |
| 2     | 43.320    | 650704  | 9973   | 50.269  | 35.926   |
| Total |           | 1294443 | 27759  | 100.000 | 100.000  |

## ==== Shimadzu LCsolution Analysis Report ====

C:\LabSolutions\Data\DMM\DVR04186B D1\_9182016\_1754 PM\_6.lcd  
 Acquired by : LC User  
 Sample Name : DVR04186B D1  
 Sample ID : DVR04186B D1  
 Tray# : 1  
 Vial # : 2  
 Injection Volume : 3 uL  
 Data File Name : DVR04186B D1\_9182016\_1754 PM\_6.lcd  
 Method File Name : col1\_5isoiPA\_60min\_1ML\_220and210.lcm  
 Batch File Name : DMM.lcb  
 Report File Name : Default.lcr  
 Data Acquired : 9/18/2016 8:06:04 PM  
 Data Processed : 9/18/2016 9:06:05 PM

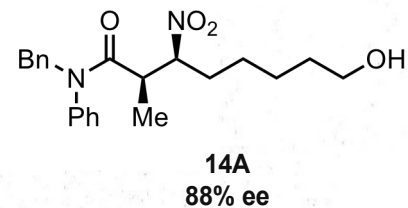

### <Chromatogram>

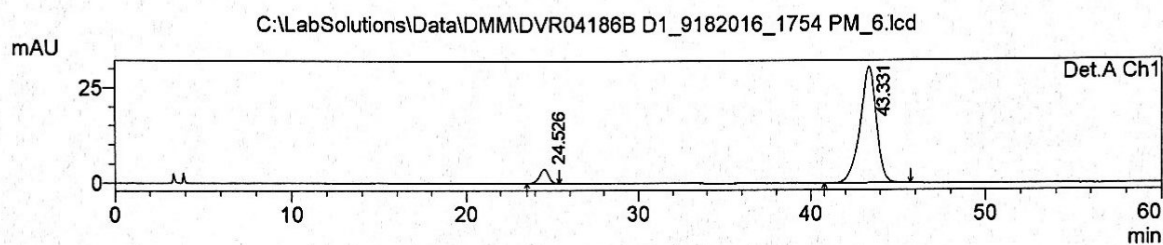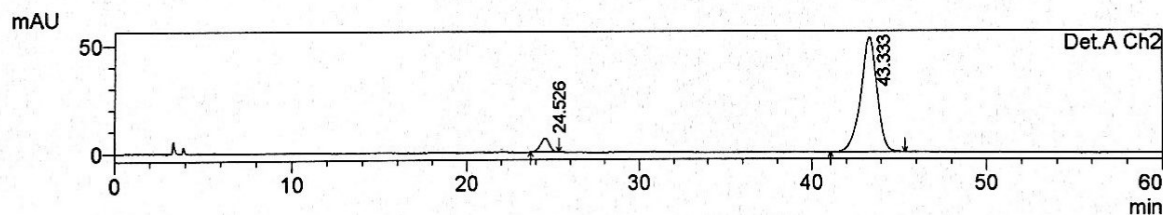

- 1 Det.A Ch1/220nm
- 2 Det.A Ch2/210nm

PeakTable

Detector A Ch1 220nm

| Peak# | Ret. Time | Area    | Height | Area %  | Height % |
|-------|-----------|---------|--------|---------|----------|
| 1     | 24.526    | 134003  | 3734   | 6.313   | 10.848   |
| 2     | 43.331    | 1988561 | 30690  | 93.687  | 89.152   |
| Total |           | 2122564 | 34424  | 100.000 | 100.000  |

PeakTable

Detector A Ch2 210nm

| Peak# | Ret. Time | Area    | Height | Area %  | Height % |
|-------|-----------|---------|--------|---------|----------|
| 1     | 24.526    | 229459  | 6505   | 6.186   | 10.782   |
| 2     | 43.333    | 3479887 | 53829  | 93.814  | 89.218   |
| Total |           | 3709345 | 60334  | 100.000 | 100.000  |

## ==== Shimadzu LCsolution Analysis Report ====

C:\LabSolutions\Data\DMM\DVR04186B RAC D2\_9182016\_1754 PM\_10.lcd  
 Acquired by : LC User  
 Sample Name : DVR04186B RAC D2  
 Sample ID : DVR04186B RAC D2  
 Tray# : 1  
 Vial # : 3  
 Injection Volume : 3 uL  
 Data File Name : DVR04186B RAC D2\_9182016\_1754 PM\_10.lcd  
 Method File Name : col2\_15isoiPA\_20min\_1ML\_220and210.lcm  
 Batch File Name : DMM.lcb  
 Report File Name : Default.lcr  
 Data Acquired : 9/18/2016 9:37:02 PM  
 Data Processed : 9/18/2016 9:57:02 PM

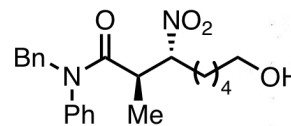

**14B**  
**racemic**

### <Chromatogram>

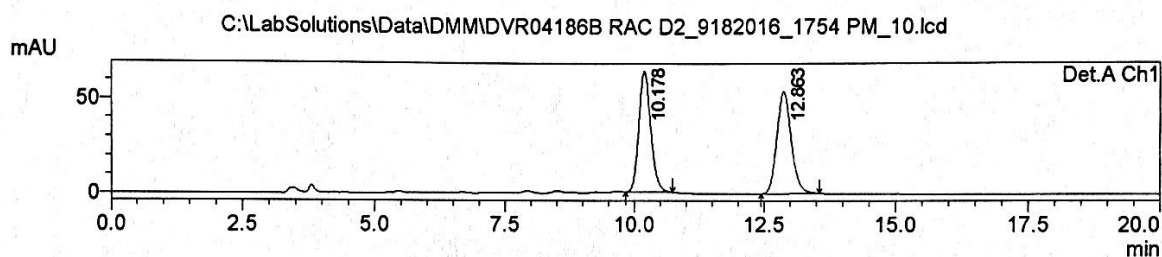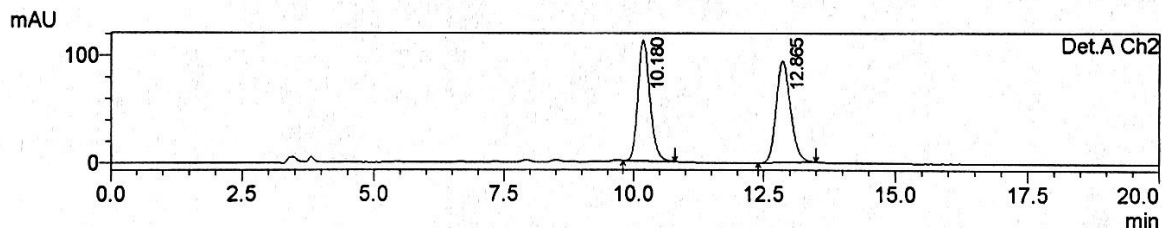

- 1 Det.A Ch1/220nm  
 2 Det.A Ch2/210nm

#### PeakTable

##### Detector A Ch1 220nm

| Peak# | Ret. Time | Area    | Height | Area %  | Height % |
|-------|-----------|---------|--------|---------|----------|
| 1     | 10.178    | 1035088 | 64444  | 49.991  | 54.356   |
| 2     | 12.863    | 1035462 | 54116  | 50.009  | 45.644   |
| Total |           | 2070550 | 118559 | 100.000 | 100.000  |

#### PeakTable

##### Detector A Ch2 210nm

| Peak# | Ret. Time | Area    | Height | Area %  | Height % |
|-------|-----------|---------|--------|---------|----------|
| 1     | 10.180    | 1824405 | 113225 | 50.147  | 54.363   |
| 2     | 12.865    | 1813704 | 95049  | 49.853  | 45.637   |
| Total |           | 3638109 | 208274 | 100.000 | 100.000  |



# ==== Shimadzu LCsolution Analysis Report ====

C:\LabSolutions\Data\DMMDVR04186B D2\_9182016\_1754 PM\_14.lcd  
 Acquired by : LC User  
 Sample Name : DVR04186B D2  
 Sample ID : DVR04186B D2  
 Tray# : 1  
 Vial # : 4  
 Injection Volume : 3 uL  
 Data File Name : DVR04186B D2\_9182016\_1754 PM\_14.lcd  
 Method File Name : col2\_15isoiPA\_20min\_1ML\_220and210.lcm  
 Batch File Name : DMM.lcb  
 Report File Name : Default.lcr  
 Data Acquired : 9/18/2016 10:27:57 PM  
 Data Processed : 9/18/2016 10:47:57 PM

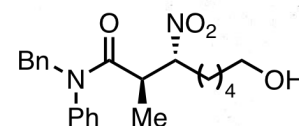

**14B**  
 77% ee

## <Chromatogram>

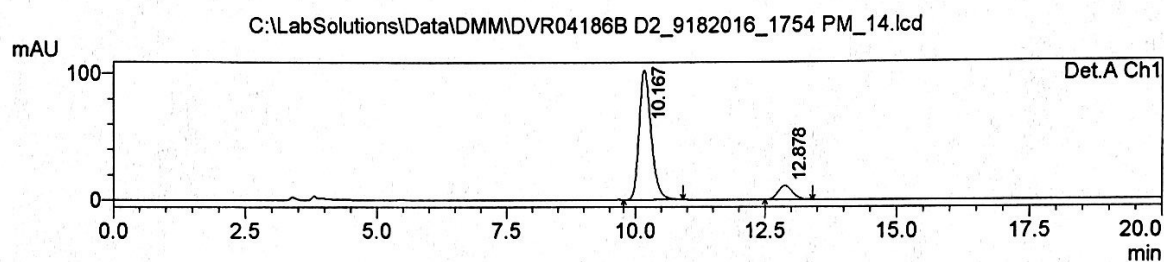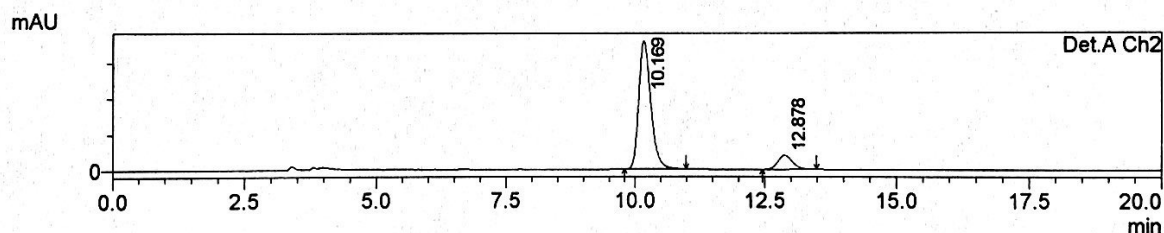

- 1 Det.A Ch1/220nm
- 2 Det.A Ch2/210nm

PeakTable

Detector A Ch1 220nm

| Peak# | Ret. Time | Area    | Height | Area %  | Height % |
|-------|-----------|---------|--------|---------|----------|
| 1     | 10.167    | 1660610 | 102762 | 88.791  | 90.266   |
| 2     | 12.878    | 209636  | 11081  | 11.209  | 9.734    |
| Total |           | 1870245 | 113843 | 100.000 | 100.000  |

PeakTable

Detector A Ch2 210nm

| Peak# | Ret. Time | Area    | Height | Area %  | Height % |
|-------|-----------|---------|--------|---------|----------|
| 1     | 10.169    | 2924609 | 180679 | 88.656  | 90.262   |
| 2     | 12.878    | 374237  | 19494  | 11.344  | 9.738    |
| Total |           | 3298846 | 200173 | 100.000 | 100.000  |

## ==== Shimadzu LCsolution Analysis Report ====

Acquired by : LC User  
 Sample Name : DVR04153 RAC SYN  
 Sample ID : DVR04153 RAC SYN  
 Tray# : 1  
 Vial # : 1  
 Injection Volume : 3 uL  
 Data File Name : DVR04153 RAC SYN\_8102016\_1351 PM\_3.lcd  
 Method File Name : col1\_1.5isoiPA\_55min\_1ml\_220and210.lcm  
 Batch File Name : DMM.lcb  
 Report File Name : Default.lcr  
 Data Acquired : 8/10/2016 3:37:04 PM  
 Data Processed : 8/10/2016 4:32:07 PM

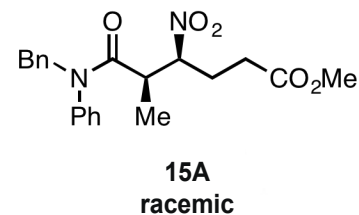

### <Chromatogram>

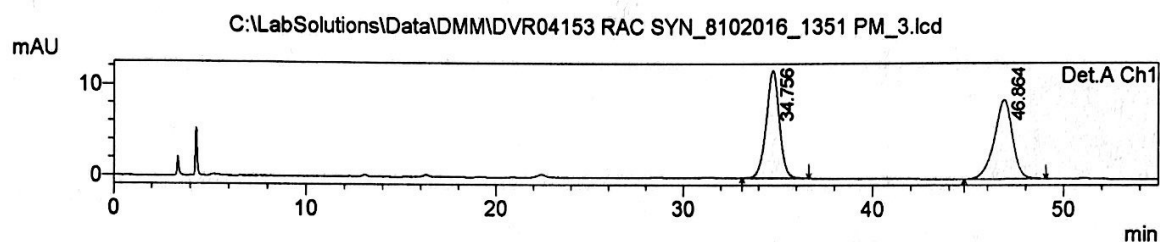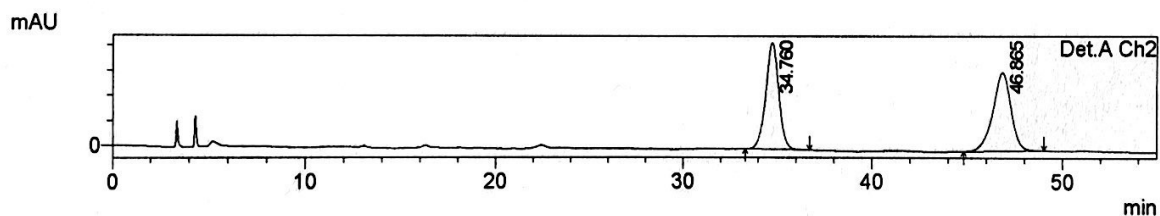

- 1 Det.A Ch1/220nm  
 2 Det.A Ch2/210nm

#### PeakTable

Detector A Ch1 220nm

| Peak# | Ret. Time | Area    | Height | Area %  | Height % |
|-------|-----------|---------|--------|---------|----------|
| 1     | 34.756    | 572557  | 11875  | 49.859  | 57.801   |
| 2     | 46.864    | 575787  | 8670   | 50.141  | 42.199   |
| Total |           | 1148343 | 20545  | 100.000 | 100.000  |

#### PeakTable

Detector A Ch2 210nm

| Peak# | Ret. Time | Area    | Height | Area %  | Height % |
|-------|-----------|---------|--------|---------|----------|
| 1     | 34.760    | 1036821 | 21570  | 49.769  | 57.706   |
| 2     | 46.865    | 1046448 | 15809  | 50.231  | 42.294   |
| Total |           | 2083269 | 37379  | 100.000 | 100.000  |

## ==== Shimadzu LCsolution Analysis Report ====

C:\LabSolutions\Data\DMM\DVR04156 SYN\_8102016\_1351 PM\_1.lcd  
 Acquired by : LC User  
 Sample Name : DVR04156 SYN  
 Sample ID : DVR04156 SYN  
 Tray# : 1  
 Vail # : 2  
 Injection Volume : 1 uL  
 Data File Name : DVR04156 SYN\_8102016\_1351 PM\_1.lcd  
 Method File Name : col1\_1.5isoiPA\_55min\_1ml\_220and210.lcm  
 Batch File Name : DMM.lcb  
 Report File Name : Default.lcr  
 Data Acquired : 8/10/2016 5:13:02 PM  
 Data Processed : 8/10/2016 6:08:03 PM

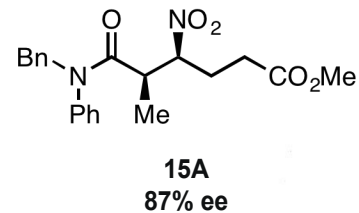

### <Chromatogram>

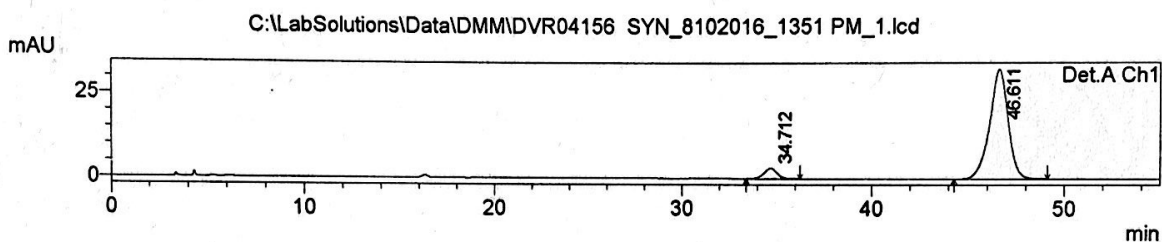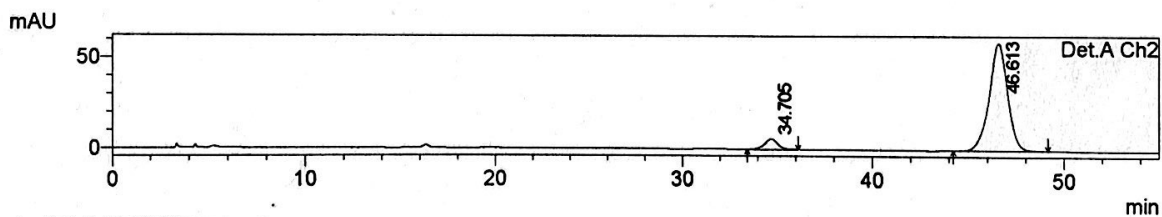

1 Det.A Ch1/220nm  
 2 Det.A Ch2/210nm

PeakTable

Detector A Ch1 220nm

| Peak# | Ret. Time | Area    | Height | Area %  | Height % |
|-------|-----------|---------|--------|---------|----------|
| 1     | 34.712    | 150536  | 3140   | 6.474   | 8.778    |
| 2     | 46.611    | 2174624 | 32634  | 93.526  | 91.222   |
| Total |           | 2325160 | 35774  | 100.000 | 100.000  |

PeakTable

Detector A Ch2 210nm

| Peak# | Ret. Time | Area    | Height | Area %  | Height % |
|-------|-----------|---------|--------|---------|----------|
| 1     | 34.705    | 279420  | 5785   | 6.590   | 8.862    |
| 2     | 46.613    | 3960833 | 59486  | 93.410  | 91.138   |
| Total |           | 4240253 | 65270  | 100.000 | 100.000  |

# ==== Shimadzu LCsolution Analysis Report ====

Acquired by : LC User  
 Sample Name : DVR04153 RAC ANTI1  
 Sample ID : DVR04153 RAC ANTI1  
 Tray# : 1  
 Vial # : 3  
 Injection Volume : 2 uL  
 Data File Name : DVR04153 RAC ANTI1\_8122016\_859 AM\_11.lcd  
 Method File Name : col2\_5isoiPA\_30min\_1ML\_254and210.lcm  
 Batch File Name : DMM.lcb  
 Report File Name : Default.lcr  
 Data Acquired : 8/12/2016 8:03:35 PM  
 Data Processed : 8/12/2016 8:33:37 PM

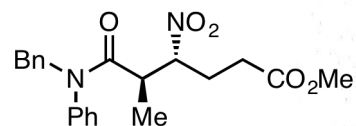

**15B**  
racemic

## <Chromatogram>

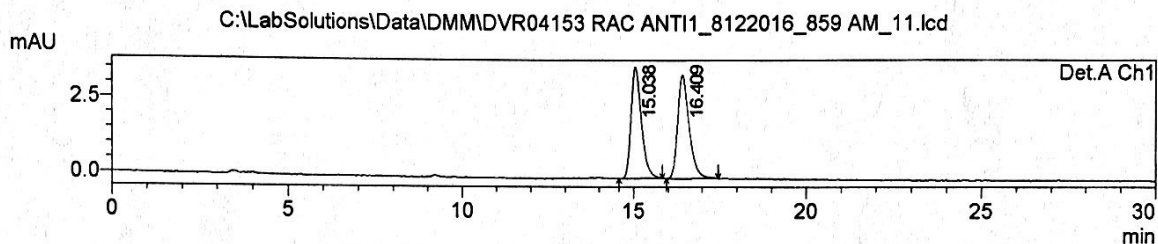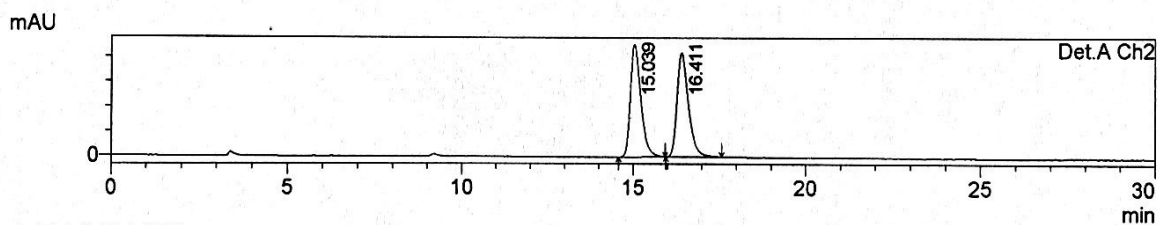

- 1 Det.A Ch1/254nm  
 2 Det.A Ch2/210nm

PeakTable

Detector A Ch1 254nm

| Peak# | Ret. Time | Area   | Height | Area %  | Height % |
|-------|-----------|--------|--------|---------|----------|
| 1     | 15.038    | 78844  | 3721   | 49.687  | 51.848   |
| 2     | 16.409    | 79837  | 3456   | 50.313  | 48.152   |
| Total |           | 158681 | 7177   | 100.000 | 100.000  |

PeakTable

Detector A Ch2 210nm

| Peak# | Ret. Time | Area    | Height | Area %  | Height % |
|-------|-----------|---------|--------|---------|----------|
| 1     | 15.039    | 1950335 | 91811  | 49.929  | 51.982   |
| 2     | 16.411    | 1955899 | 84808  | 50.071  | 48.018   |
| Total |           | 3906234 | 176619 | 100.000 | 100.000  |



## ==== Shimadzu LCsolution Analysis Report ====

C:\LabSolutions\Data\DMMDVR04156 ANTI 1\_8122016\_859 AM\_15.lcd  
 Acquired by : LC User  
 Sample Name : DVR04156 ANTI 1  
 Sample ID : DVR04156 ANTI 1  
 Tray# : 1  
 Vial # : 4  
 Injection Volume : 2 uL  
 Data File Name : DVR04156 ANTI 1\_8122016\_859 AM\_15.lcd  
 Method File Name : col2\_5isoiPA\_30min\_1ML\_254and210.lcm  
 Batch File Name : DMM.lcb  
 Report File Name : Default.lcr  
 Data Acquired : 8/12/2016 9:14:34 PM  
 Data Processed : 8/12/2016 9:44:36 PM

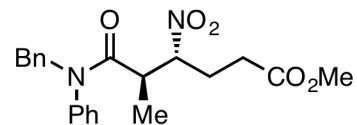

**15B**  
**63% ee**

### <Chromatogram>

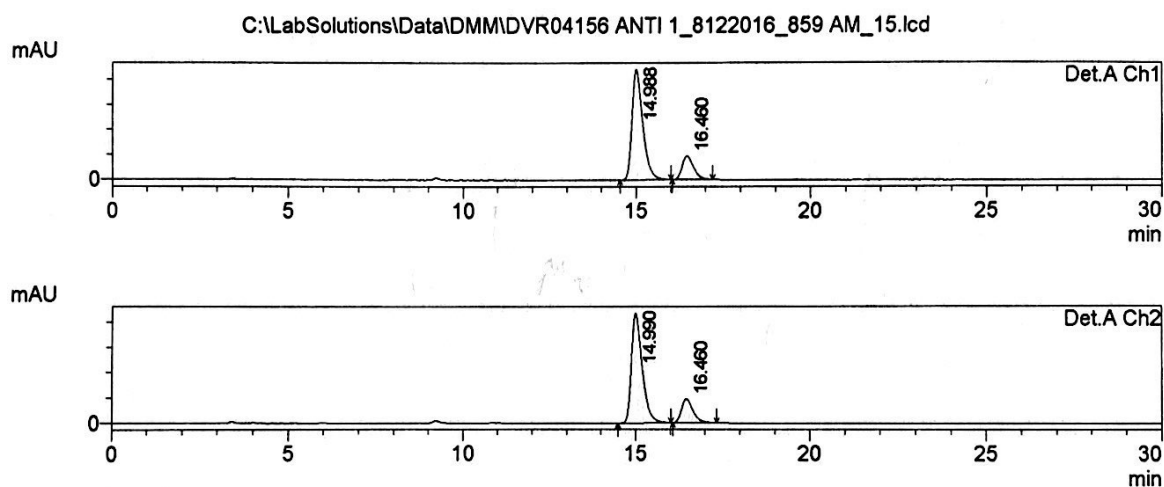

1 Det.A Ch1/254nm  
 2 Det.A Ch2/210nm

PeakTable

Detector A Ch1 254nm

| Peak# | Ret. Time | Area   | Height | Area %  | Height % |
|-------|-----------|--------|--------|---------|----------|
| 1     | 14.988    | 190860 | 8863   | 81.634  | 82.328   |
| 2     | 16.460    | 42939  | 1902   | 18.366  | 17.672   |
| Total |           | 233799 | 10765  | 100.000 | 100.000  |

PeakTable

Detector A Ch2 210nm

| Peak# | Ret. Time | Area    | Height | Area %  | Height % |
|-------|-----------|---------|--------|---------|----------|
| 1     | 14.990    | 4691540 | 217336 | 81.423  | 82.165   |
| 2     | 16.460    | 1070383 | 47175  | 18.577  | 17.835   |
| Total |           | 5761923 | 264510 | 100.000 | 100.000  |



# ==== Shimadzu LCsolution Analysis Report ====

C:\LabSolutions\Data\DMMRS-01-247-RES D1\_10272016\_853 AM\_4.lcd  
 Acquired by : LC User  
 Sample Name : RS-01-247-RES D1  
 Sample ID : RS-01-247-RES D1  
 Tray# : 1  
 Vial # : 91  
 Injection Volume : 3 uL  
 Data File Name : RS-01-247-RES D1\_10272016\_853 AM\_4.lcd  
 Method File Name : col1\_3isoiPA\_45min\_1ML\_254and210.lcm  
 Batch File Name : DMM.lcb  
 Report File Name : Default.lcr  
 Data Acquired : 10/27/2016 10:49:50 AM  
 Data Processed : 10/27/2016 11:34:53 AM

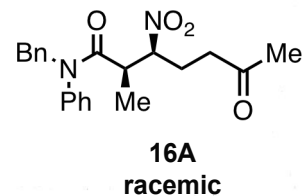

## <Chromatogram>

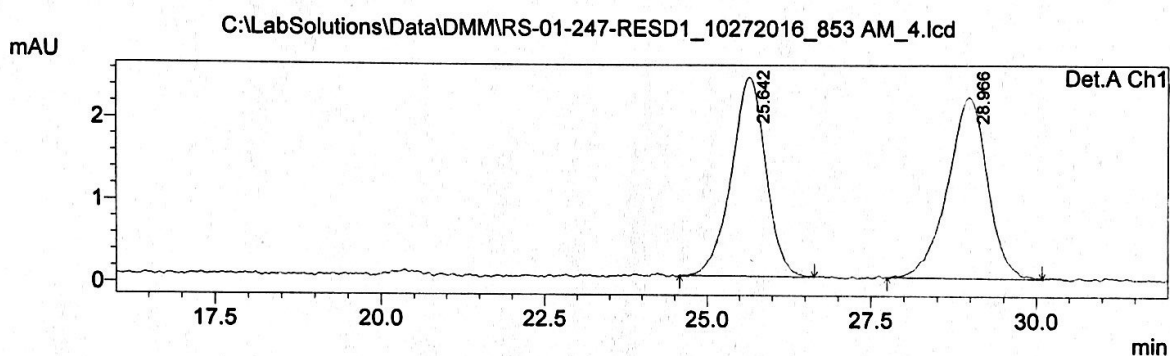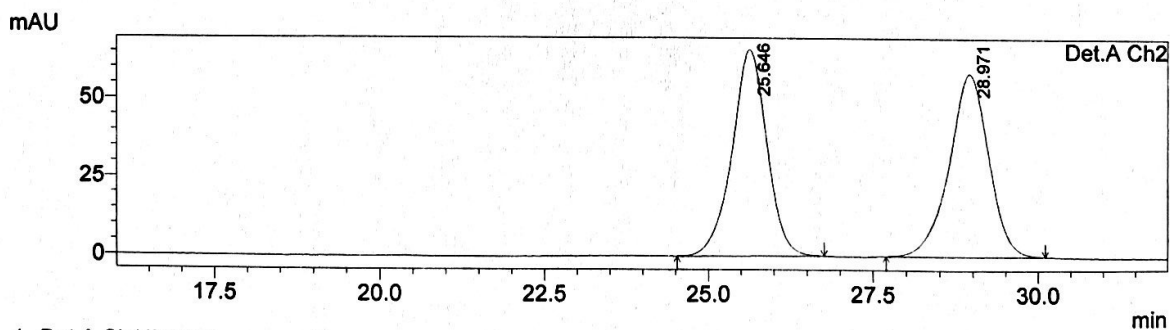

- 1 Det.A Ch1/254nm
- 2 Det.A Ch2/210nm

PeakTable

Detector A Ch1 254nm

| Peak# | Ret. Time | Area   | Height | Area %  | Height % |
|-------|-----------|--------|--------|---------|----------|
| 1     | 25.642    | 89065  | 2431   | 49.047  | 52.432   |
| 2     | 28.966    | 92527  | 2205   | 50.953  | 47.568   |
| Total |           | 181592 | 4636   | 100.000 | 100.000  |

PeakTable

Detector A Ch2 210nm

| Peak# | Ret. Time | Area    | Height | Area %  | Height % |
|-------|-----------|---------|--------|---------|----------|
| 1     | 25.646    | 2422797 | 65652  | 49.984  | 53.023   |
| 2     | 28.971    | 2424345 | 58167  | 50.016  | 46.977   |
| Total |           | 4847142 | 123819 | 100.000 | 100.000  |

# ==== Shimadzu LCsolution Analysis Report ====

C:\LabSolutions\Data\DMMRS-01-247-D1\_10242016\_2114 PM\_4.lcd  
 Acquired by : LC User  
 Sample Name : RS-01-247-D1  
 Sample ID : RS-01-247-D1  
 Tray# : 1  
 Vial # : 92  
 Injection Volume : 3 uL  
 Data File Name : RS-01-247-D1\_10242016\_2114 PM\_4.lcd  
 Method File Name : col1\_3isoiPA\_60min\_1ML\_254and210.lcm  
 Batch File Name : DMM.lcb  
 Report File Name : Default.lcr  
 Data Acquired : 10/24/2016 10:06:00 PM  
 Data Processed : 12/20/2016 12:42:13 PM

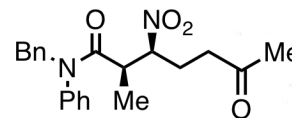

## <Chromatogram>

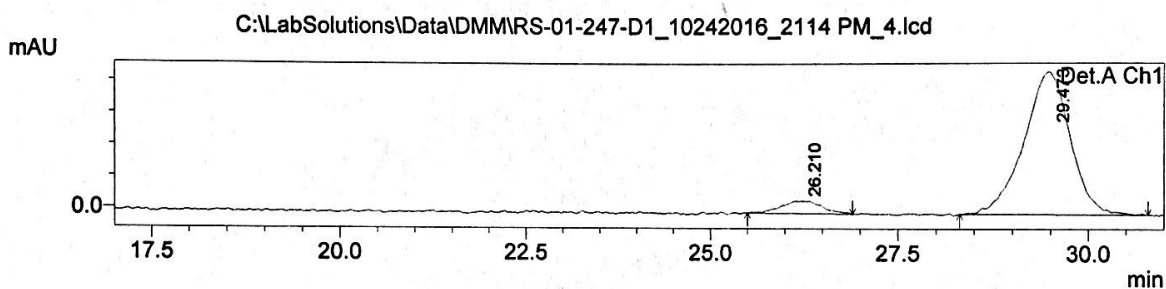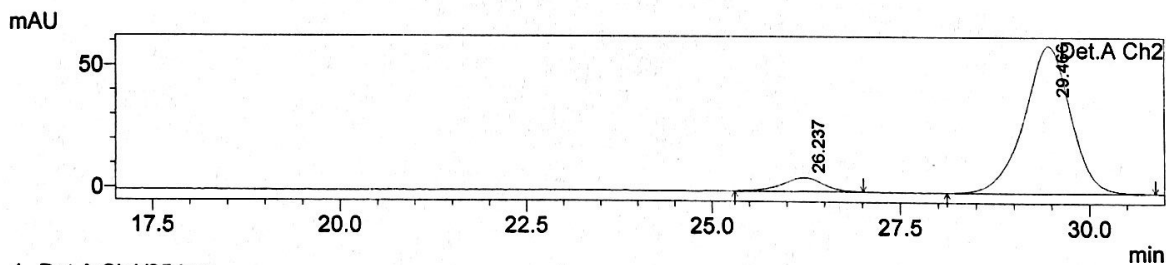

- 1 Det.A Ch1/254nm
- 2 Det.A Ch2/210nm

PeakTable

Detector A Ch1 254nm

| Peak# | Ret. Time | Area   | Height | Area %  | Height % |
|-------|-----------|--------|--------|---------|----------|
| 1     | 26.210    | 7729   | 196    | 7.547   | 8.102    |
| 2     | 29.473    | 94683  | 2225   | 92.453  | 91.898   |
| Total |           | 102412 | 2421   | 100.000 | 100.000  |

PeakTable

Detector A Ch2 210nm

| Peak# | Ret. Time | Area    | Height | Area %  | Height % |
|-------|-----------|---------|--------|---------|----------|
| 1     | 26.237    | 210828  | 5600   | 7.591   | 8.553    |
| 2     | 29.466    | 2566655 | 59873  | 92.409  | 91.447   |
| Total |           | 2777482 | 65474  | 100.000 | 100.000  |

# ==== Shimadzu LCsolution Analysis Report ====

C:\LabSolutions\Data\DMMRS-01-247-RES2\_10272016\_853 AM\_5.lcd  
 Acquired by : LC User  
 Sample Name : RS-01-247-RES2  
 Sample ID : RS-01-247-RES2  
 Tray# : 1  
 Vial # : 93  
 Injection Volume : 3 uL  
 Data File Name : RS-01-247-RES2\_10272016\_853 AM\_5.lcd  
 Method File Name : col1\_3isoiPA\_60min\_1ML\_254and210.lcm  
 Batch File Name : DMM.lcb  
 Report File Name : Default.lcr  
 Data Acquired : 10/27/2016 12:42:20 PM  
 Data Processed : 10/31/2016 8:14:16 AM

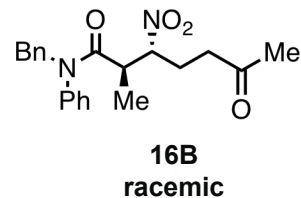

## <Chromatogram>

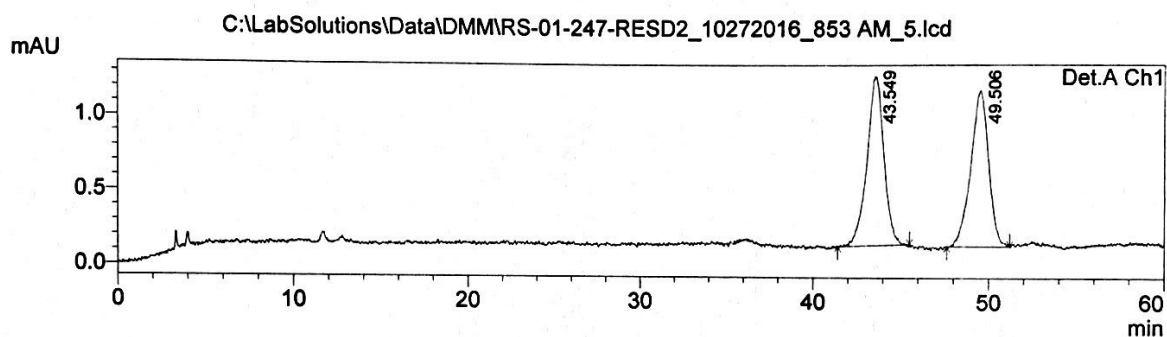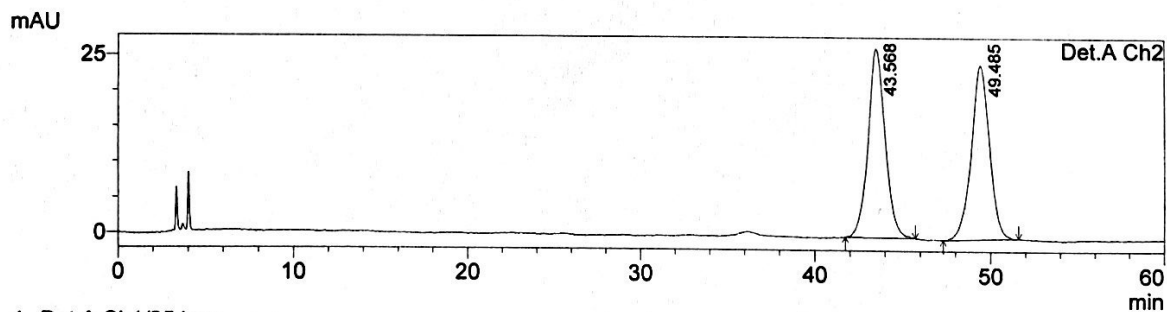

- 1 Det.A Ch1/254nm
- 2 Det.A Ch2/210nm

PeakTable

Detector A Ch1 254nm

| Peak# | Ret. Time | Area   | Height | Area %  | Height % |
|-------|-----------|--------|--------|---------|----------|
| 1     | 43.549    | 76267  | 1139   | 50.922  | 52.067   |
| 2     | 49.506    | 73505  | 1049   | 49.078  | 47.933   |
| Total |           | 149773 | 2188   | 100.000 | 100.000  |

PeakTable

Detector A Ch2 210nm

| Peak# | Ret. Time | Area    | Height | Area %  | Height % |
|-------|-----------|---------|--------|---------|----------|
| 1     | 43.568    | 1790765 | 26534  | 50.525  | 52.094   |
| 2     | 49.485    | 1753536 | 24401  | 49.475  | 47.906   |
| Total |           | 3544301 | 50935  | 100.000 | 100.000  |

# ==== Shimadzu LCsolution Analysis Report ====

C:\LabSolutions\Data\DMM\RS-01-247D2\_10272016\_853 AM\_6.lcd  
 Acquired by : LC User  
 Sample Name : RS-01-247D2  
 Sample ID : RS-01-247D2  
 Tray# : 1  
 Vial # : 94  
 Injection Volume : 3 uL  
 Data File Name : RS-01-247D2\_10272016\_853 AM\_6.lcd  
 Method File Name : col1\_3isoiPA\_60min\_1ML\_254and210.lcm  
 Batch File Name : DMM.lcb  
 Report File Name : Default.lcr  
 Data Acquired : 10/27/2016 1:42:57 PM  
 Data Processed : 10/31/2016 8:12:11 AM

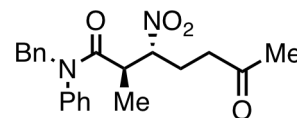

**16B**  
84% ee

## <Chromatogram>

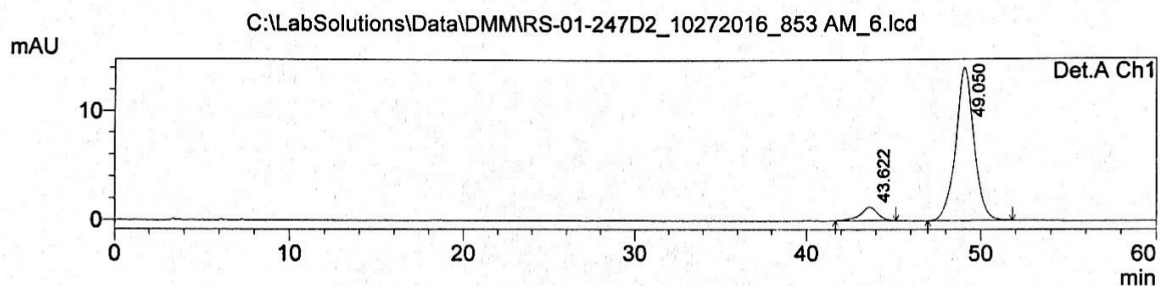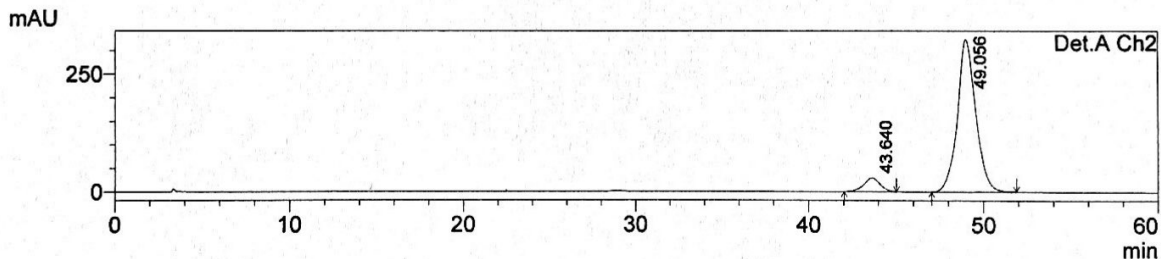

- 1 Det.A Ch1/254nm
- 2 Det.A Ch2/210nm

PeakTable

Detector A Ch1 254nm

| Peak#        | Ret. Time | Area           | Height       | Area %         | Height %       |
|--------------|-----------|----------------|--------------|----------------|----------------|
| 1            | 43.622    | 87935          | 1268         | 7.909          | 8.278          |
| 2            | 49.050    | 1023909        | 14050        | 92.091         | 91.722         |
| <b>Total</b> |           | <b>1111844</b> | <b>15318</b> | <b>100.000</b> | <b>100.000</b> |

PeakTable

Detector A Ch2 210nm

| Peak#        | Ret. Time | Area            | Height        | Area %         | Height %       |
|--------------|-----------|-----------------|---------------|----------------|----------------|
| 1            | 43.640    | 1888494         | 29071         | 7.384          | 8.229          |
| 2            | 49.056    | 23688716        | 324191        | 92.616         | 91.771         |
| <b>Total</b> |           | <b>25577210</b> | <b>353262</b> | <b>100.000</b> | <b>100.000</b> |

# ==== Shimadzu LCsolution Analysis Report ====

C:\LabSolutions\Data\DMMDVR04176D1 RAC\_912016\_1826 PM\_2.lcd  
 Acquired by : LC User  
 Sample Name : DVR04176D1 RAC  
 Sample ID : DVR04176D1 RAC  
 Tray# : 1  
 Vial # : 1  
 Injection Volume : 2 uL  
 Data File Name : DVR04176D1 RAC\_912016\_1826 PM\_2.lcd  
 Method File Name : col1\_3isoiPA\_30min\_1ML\_220and210.lcm  
 Batch File Name : DMM.lcb  
 Report File Name : Default.lcr  
 Data Acquired : 9/1/2016 6:56:42 PM  
 Data Processed : 9/1/2016 7:26:45 PM

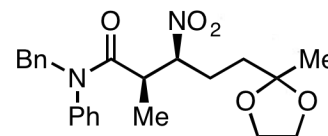

**17A**  
racemic

## <Chromatogram>

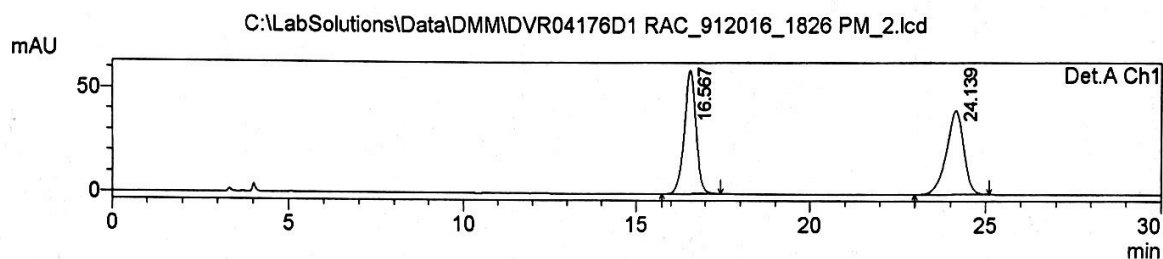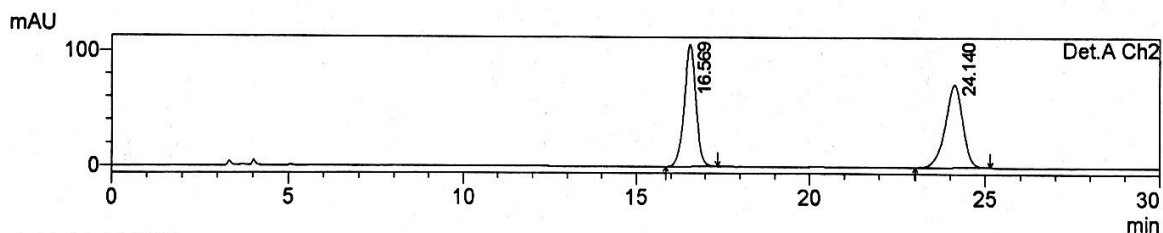

1 Det.A Ch1/220nm  
 2 Det.A Ch2/210nm

PeakTable

Detector A Ch1 220nm

| Peak# | Ret. Time | Area    | Height | Area %  | Height % |
|-------|-----------|---------|--------|---------|----------|
| 1     | 16.567    | 1385353 | 59416  | 50.092  | 59.595   |
| 2     | 24.139    | 1380273 | 40283  | 49.908  | 40.405   |
| Total |           | 2765626 | 99700  | 100.000 | 100.000  |

PeakTable

Detector A Ch2 210nm

| Peak# | Ret. Time | Area    | Height | Area %  | Height % |
|-------|-----------|---------|--------|---------|----------|
| 1     | 16.569    | 2486420 | 106893 | 49.990  | 59.569   |
| 2     | 24.140    | 2487449 | 72551  | 50.010  | 40.431   |
| Total |           | 4973869 | 179444 | 100.000 | 100.000  |

# ==== Shimadzu LCsolution Analysis Report ====

C:\LabSolutions\Data\DMM\DVR04176D1 SYN\_912016\_1826 PM\_6.lcd  
 Acquired by : LC User  
 Sample Name : DVR04176D1 SYN  
 Sample ID : DVR04176D1 SYN  
 Tray# : 1  
 Vial # : 2  
 Injection Volume : 2 uL  
 Data File Name : DVR04176D1 SYN\_912016\_1826 PM\_6.lcd  
 Method File Name : col1\_3isoiPA\_30min\_1ML\_220and210.lcm  
 Batch File Name : DMM.lcb  
 Report File Name : Default.lcr  
 Data Acquired : 9/1/2016 8:07:38 PM  
 Data Processed : 9/1/2016 8:37:39 PM

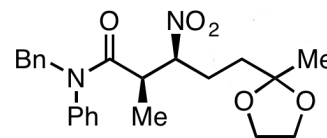

**17A**  
**89% ee**

## <Chromatogram>

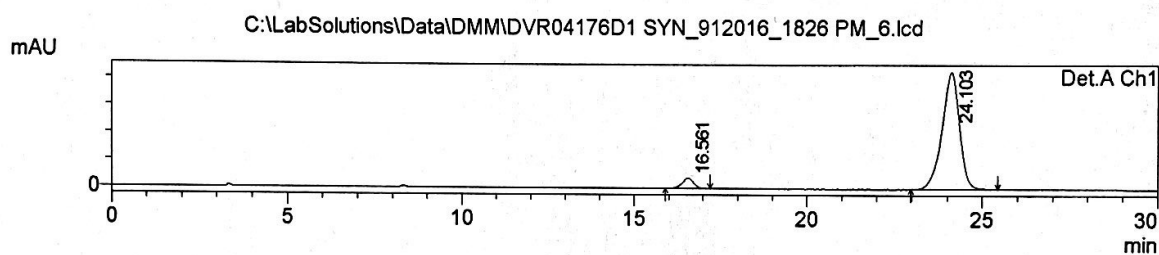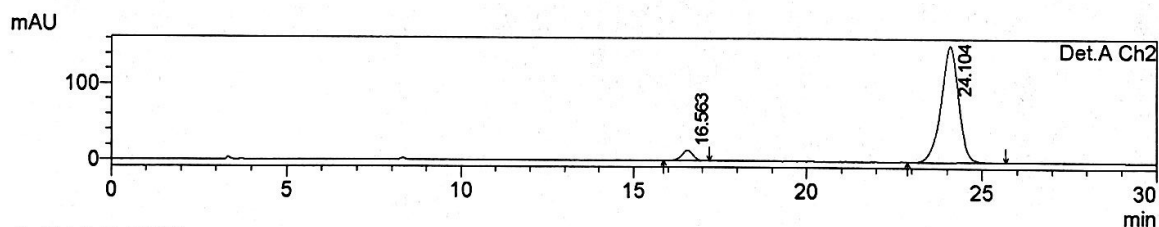

- 1 Det.A Ch1/220nm
- 2 Det.A Ch2/210nm

### PeakTable

Detector A Ch1 220nm

| Peak#        | Ret. Time | Area           | Height       | Area %         | Height %       |
|--------------|-----------|----------------|--------------|----------------|----------------|
| 1            | 16.561    | 178292         | 7696         | 5.702          | 8.267          |
| 2            | 24.103    | 2948606        | 85402        | 94.298         | 91.733         |
| <b>Total</b> |           | <b>3126898</b> | <b>93098</b> | <b>100.000</b> | <b>100.000</b> |

### PeakTable

Detector A Ch2 210nm

| Peak#        | Ret. Time | Area           | Height        | Area %         | Height %       |
|--------------|-----------|----------------|---------------|----------------|----------------|
| 1            | 16.563    | 320036         | 13837         | 5.672          | 8.257          |
| 2            | 24.104    | 5321908        | 153737        | 94.328         | 91.743         |
| <b>Total</b> |           | <b>5641945</b> | <b>167574</b> | <b>100.000</b> | <b>100.000</b> |



## ==== Shimadzu LCsolution Analysis Report ====

C:\LabSolutions\Data\DMM\DVR04176D2 RAC\_922016\_1106 AM\_2.lcd  
 Acquired by : LC User  
 Sample Name : DVR04176D2 RAC  
 Sample ID : DVR04176D2 RAC  
 Tray# : 1  
 Vial # : 1  
 Injection Volume : 2 uL  
 Data File Name : DVR04176D2 RAC\_922016\_1106 AM\_2.lcd  
 Method File Name : col1\_3isoiPA\_45min\_1ML\_220and210.lcm  
 Batch File Name : DMM.lcb  
 Report File Name : Default.lcr  
 Data Acquired : 9/2/2016 11:52:31 AM  
 Data Processed : 9/2/2016 12:37:32 PM

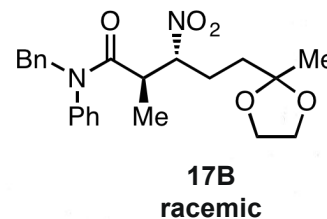

### <Chromatogram>

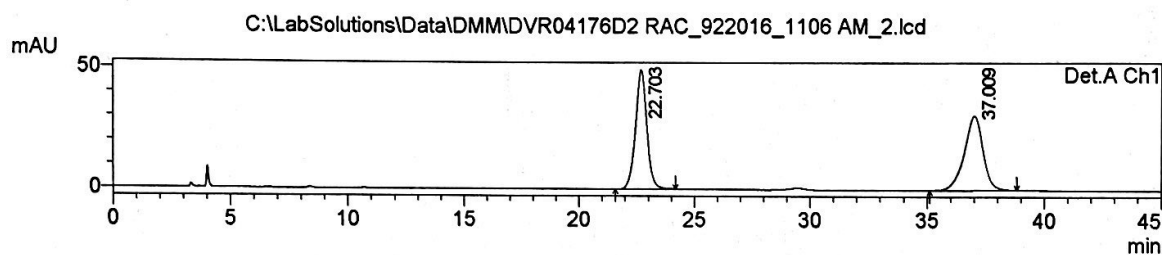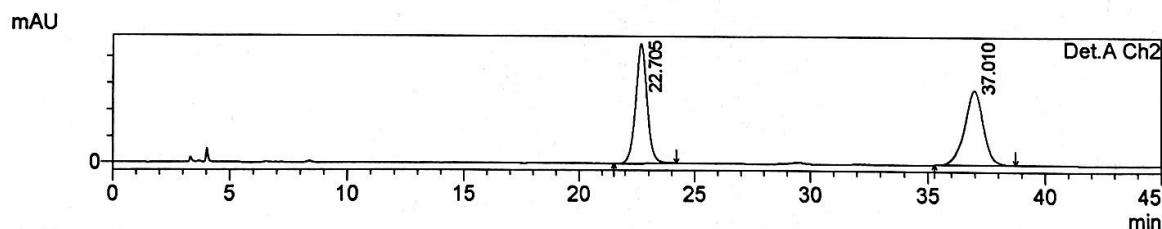

- 1 Det.A Ch1/220nm  
 2 Det.A Ch2/210nm

PeakTable

Detector A Ch1 220nm

| Peak# | Ret. Time | Area    | Height | Area %  | Height % |
|-------|-----------|---------|--------|---------|----------|
| 1     | 22.703    | 1695439 | 49784  | 49.579  | 61.673   |
| 2     | 37.009    | 1724221 | 30939  | 50.421  | 38.327   |
| Total |           | 3419661 | 80723  | 100.000 | 100.000  |

PeakTable

Detector A Ch2 210nm

| Peak# | Ret. Time | Area    | Height | Area %  | Height % |
|-------|-----------|---------|--------|---------|----------|
| 1     | 22.705    | 3103114 | 91134  | 49.746  | 61.735   |
| 2     | 37.010    | 3134829 | 56487  | 50.254  | 38.265   |
| Total |           | 6237943 | 147621 | 100.000 | 100.000  |

## ==== Shimadzu LCsolution Analysis Report ====

C:\LabSolutions\Data\DMMDVR04176D2 anti\_922016\_1106 AM\_6.lcd  
 Acquired by : LC User  
 Sample Name : DVR04176D2 anti  
 Sample ID : DVR04176D2 anti  
 Tray# : 1  
 Vial # : 2  
 Injection Volume : 2 uL  
 Data File Name : DVR04176D2 anti\_922016\_1106 AM\_6.lcd  
 Method File Name : col1\_3isoiPA\_45min\_1ML\_220and210.lcm  
 Batch File Name : DMM.lcb  
 Report File Name : Default.lcr  
 Data Acquired : 9/2/2016 1:33:25 PM  
 Data Processed : 9/2/2016 2:18:28 PM

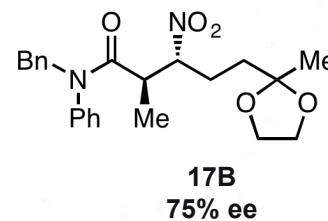

### <Chromatogram>

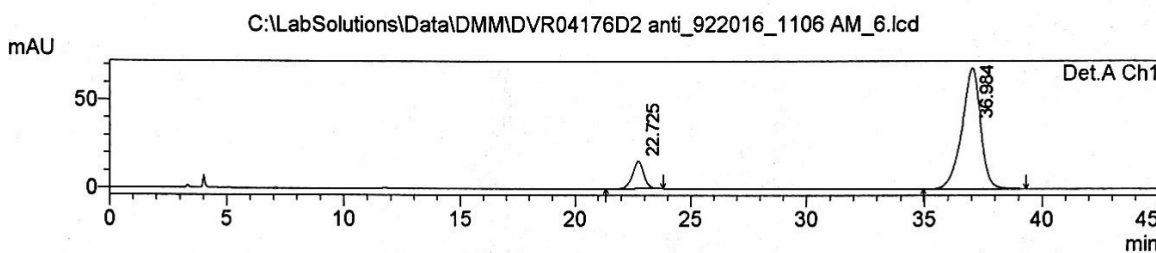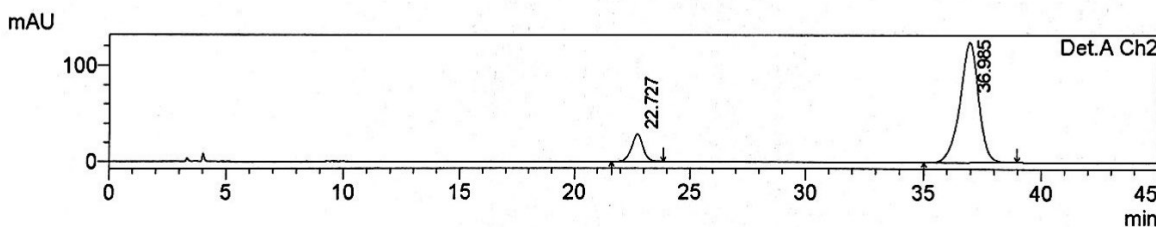

- 1 Det.A Ch1/220nm
- 2 Det.A Ch2/210nm

#### PeakTable

##### Detector A Ch1 220nm

| Peak# | Ret. Time | Area    | Height | Area %  | Height % |
|-------|-----------|---------|--------|---------|----------|
| 1     | 22.725    | 532796  | 15633  | 12.406  | 18.626   |
| 2     | 36.984    | 3761888 | 68295  | 87.594  | 81.374   |
| Total |           | 4294684 | 83928  | 100.000 | 100.000  |

#### PeakTable

##### Detector A Ch2 210nm

| Peak# | Ret. Time | Area    | Height | Area %  | Height % |
|-------|-----------|---------|--------|---------|----------|
| 1     | 22.727    | 982074  | 28668  | 12.515  | 18.662   |
| 2     | 36.985    | 6865144 | 124952 | 87.485  | 81.338   |
| Total |           | 7847218 | 153621 | 100.000 | 100.000  |



## ==== Shimadzu LCsolution Analysis Report ====

C:\LabSolutions\Data\DMM\DVR04216RAC\_10172016\_1228 PM\_1.lcd  
 Acquired by : LC User  
 Sample Name : DVR04216RAC  
 Sample ID : DVR04216RAC  
 Tray# : 1  
 Vial # : 2  
 Injection Volume : 2 uL  
 Data File Name : DVR04216RAC\_10172016\_1228 PM\_1.lcd  
 Method File Name : col1\_3isoiPA\_30min\_1ML\_220and210.lcm  
 Batch File Name : DMM.lcb  
 Report File Name : Default.lcr  
 Data Acquired : 10/17/2016 8:58:59 PM  
 Data Processed : 10/17/2016 9:29:00 PM

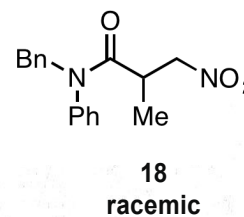

### <Chromatogram>

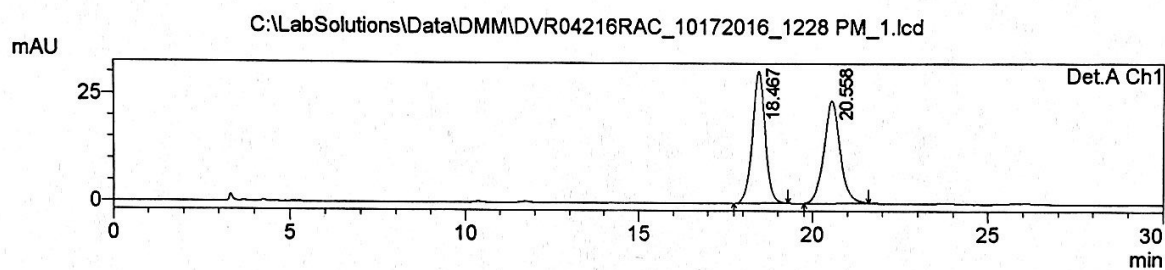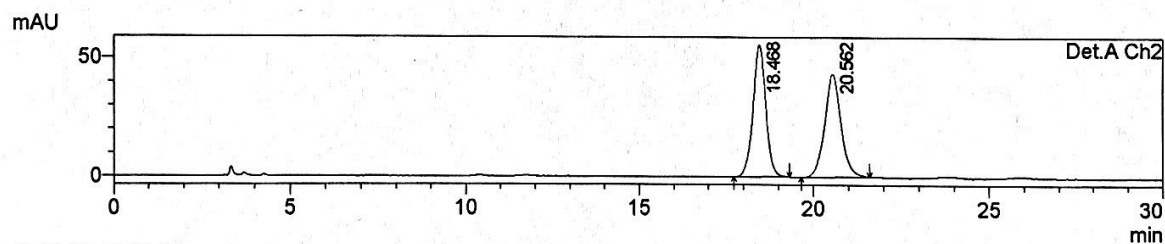

- 1 Det.A Ch1/220nm
- 2 Det.A Ch2/210nm

PeakTable

Detector A Ch1 220nm

| Peak# | Ret. Time | Area    | Height | Area %  | Height % |
|-------|-----------|---------|--------|---------|----------|
| 1     | 18.467    | 779496  | 30751  | 50.358  | 56.225   |
| 2     | 20.558    | 768425  | 23941  | 49.642  | 43.775   |
| Total |           | 1547921 | 54692  | 100.000 | 100.000  |

PeakTable

Detector A Ch2 210nm

| Peak# | Ret. Time | Area    | Height | Area %  | Height % |
|-------|-----------|---------|--------|---------|----------|
| 1     | 18.468    | 1419230 | 56009  | 50.219  | 56.182   |
| 2     | 20.562    | 1406872 | 43683  | 49.781  | 43.818   |
| Total |           | 2826102 | 99693  | 100.000 | 100.000  |

# ==== Shimadzu LCsolution Analysis Report ====

C:\LabSolutions\Data\DMM\DVR04216\_10152016\_2043 PM\_2.lcd  
 Acquired by : LC User  
 Sample Name : DVR04216  
 Sample ID : DVR04216  
 Tray# : 1  
 Vial # : 1  
 Injection Volume : 2 uL  
 Data File Name : DVR04216\_10152016\_2043 PM\_2.lcd  
 Method File Name : col1\_3isoiPA\_30min\_1ML\_220and210.lcm  
 Batch File Name : DMM.lcb  
 Report File Name : Default.lcr  
 Data Acquired : 10/15/2016 8:54:06 PM  
 Data Processed : 10/15/2016 9:24:09 PM

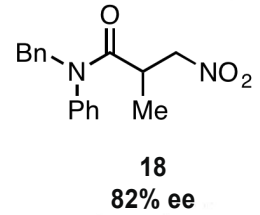

## <Chromatogram>

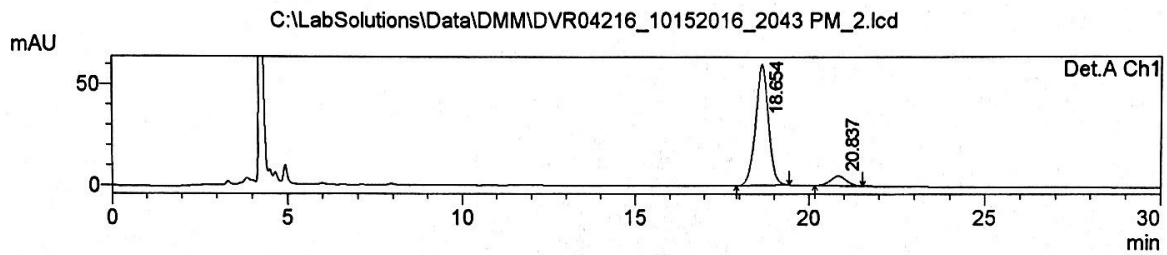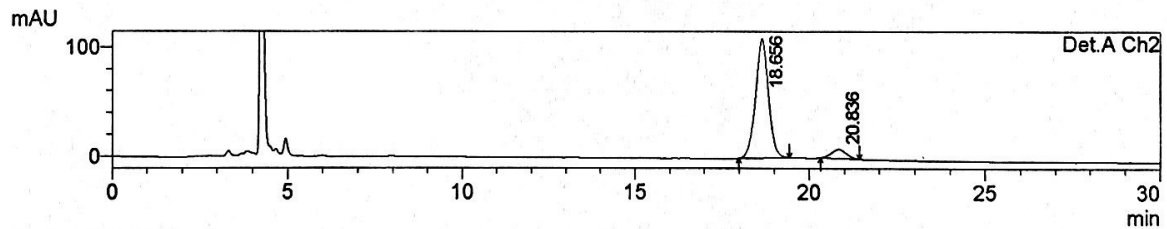

- 1 Det.A Ch1/220nm  
 2 Det.A Ch2/210nm

PeakTable

Detector A Ch1 220nm

| Peak# | Ret. Time | Area    | Height | Area %  | Height % |
|-------|-----------|---------|--------|---------|----------|
| 1     | 18.654    | 1541824 | 60100  | 90.868  | 92.496   |
| 2     | 20.837    | 154941  | 4876   | 9.132   | 7.504    |
| Total |           | 1696765 | 64975  | 100.000 | 100.000  |

PeakTable

Detector A Ch2 210nm

| Peak# | Ret. Time | Area    | Height | Area %  | Height % |
|-------|-----------|---------|--------|---------|----------|
| 1     | 18.656    | 2802804 | 109497 | 91.979  | 92.920   |
| 2     | 20.836    | 244404  | 8343   | 8.021   | 7.080    |
| Total |           | 3047208 | 117840 | 100.000 | 100.000  |

# ==== Shimadzu LCsolution Analysis Report ====

Acquired by : LC User  
 Sample Name : DVR04203 RAC SYN  
 Sample ID : DVR04203 RAC SYN  
 Tray# : 1  
 Vial # : 1  
 Injection Volume : 2 uL  
 Data File Name : DVR04203 RAC SYN\_9292016\_1421 PM\_2.lcd  
 Method File Name : col3\_2isoiPA\_45min\_1ML\_220and210.lcm  
 Batch File Name : DMM.lcb  
 Report File Name : Default.lcr  
 Data Acquired : 9/29/2016 3:07:12 PM  
 Data Processed : 9/29/2016 3:52:14 PM

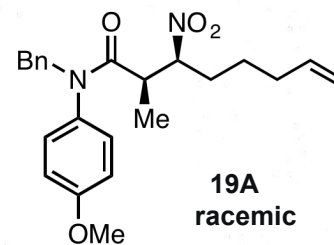

## <Chromatogram>

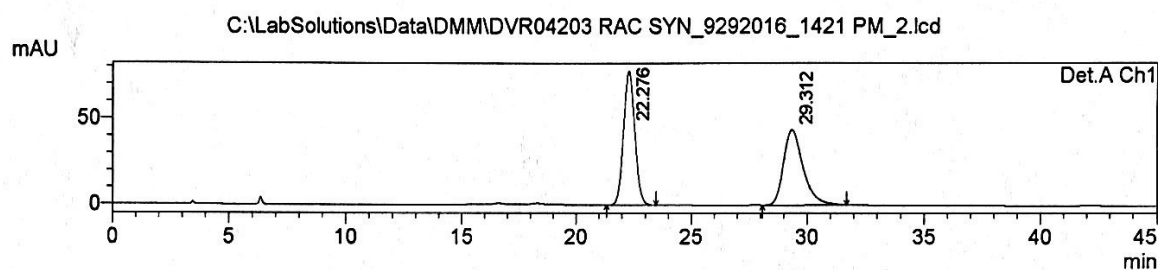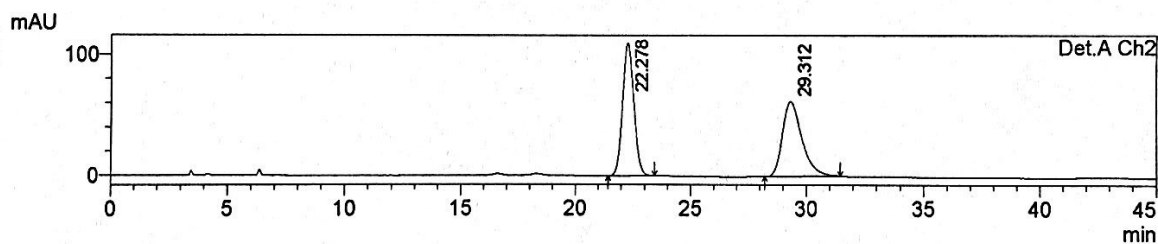

- 1 Det.A Ch1/220nm
- 2 Det.A Ch2/210nm

### PeakTable

Detector A Ch1 220nm

| Peak# | Ret. Time | Area    | Height | Area %  | Height % |
|-------|-----------|---------|--------|---------|----------|
| 1     | 22.276    | 2659822 | 77815  | 50.873  | 63.959   |
| 2     | 29.312    | 2568546 | 43848  | 49.127  | 36.041   |
| Total |           | 5228369 | 121663 | 100.000 | 100.000  |

### PeakTable

Detector A Ch2 210nm

| Peak# | Ret. Time | Area    | Height | Area %  | Height % |
|-------|-----------|---------|--------|---------|----------|
| 1     | 22.278    | 3778750 | 110421 | 51.048  | 63.956   |
| 2     | 29.312    | 3623583 | 62230  | 48.952  | 36.044   |
| Total |           | 7402333 | 172651 | 100.000 | 100.000  |

## ==== Shimadzu LCsolution Analysis Report ====

C:\LabSolutions\Data\DMM\DVR04203D1\_1022016\_1418 PM\_6.lcd  
 Acquired by : LC User  
 Sample Name : DVR04203D1  
 Sample ID : DVR04203D1  
 Tray# : 1  
 Vial # : 2  
 Injection Volume : 3 uL  
 Data File Name : DVR04203D1\_1022016\_1418 PM\_6.lcd  
 Method File Name : col3\_2isoiPA\_45min\_1ML\_220and210.lcm  
 Batch File Name : DMM.lcb  
 Report File Name : Default.lcr  
 Data Acquired : 10/2/2016 4:45:26 PM  
 Data Processed : 10/2/2016 5:30:28 PM

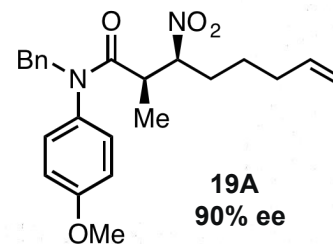

### <Chromatogram>

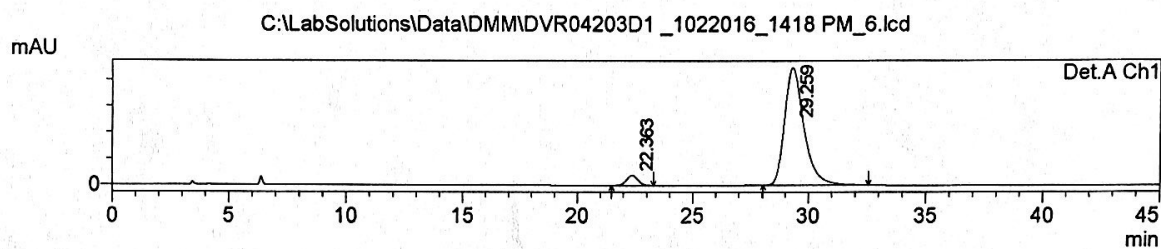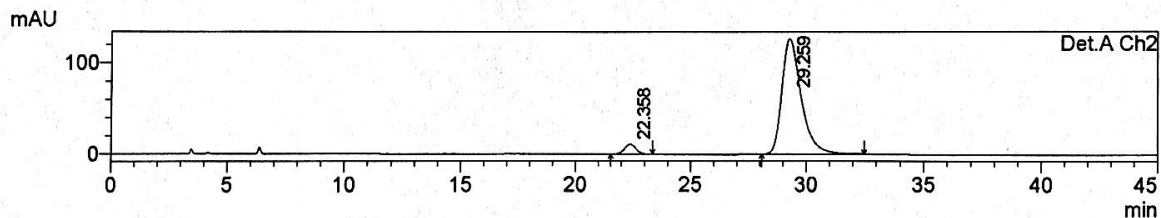

- 1 Det.A Ch1/220nm
- 2 Det.A Ch2/210nm

PeakTable

Detector A Ch1 220nm

| Peak# | Ret. Time | Area    | Height | Area %  | Height % |
|-------|-----------|---------|--------|---------|----------|
| 1     | 22.363    | 265768  | 7743   | 4.856   | 7.942    |
| 2     | 29.259    | 5206917 | 89759  | 95.144  | 92.058   |
| Total |           | 5472685 | 97503  | 100.000 | 100.000  |

PeakTable

Detector A Ch2 210nm

| Peak# | Ret. Time | Area    | Height | Area %  | Height % |
|-------|-----------|---------|--------|---------|----------|
| 1     | 22.358    | 377460  | 11067  | 4.868   | 8.003    |
| 2     | 29.259    | 7376937 | 127221 | 95.132  | 91.997   |
| Total |           | 7754396 | 138288 | 100.000 | 100.000  |



## ==== Shimadzu LCsolution Analysis Report ====

Acquired by : LC User  
 Sample Name : DVR04203D2 RAC  
 Sample ID : DVR04203D2 RAC  
 Tray# : 1  
 Vial # : 3  
 Injection Volume : 3 uL  
 Data File Name : DVR04203D2 RAC\_1022016\_1418 PM\_10.lcd  
 Method File Name : col2\_0.8isolPA\_60min\_1ml\_254and210.lcm  
 Batch File Name : DMM.lcb  
 Report File Name : Default.lcr  
 Data Acquired : 10/2/2016 6:11:24 PM  
 Data Processed : 10/2/2016 7:11:28 PM

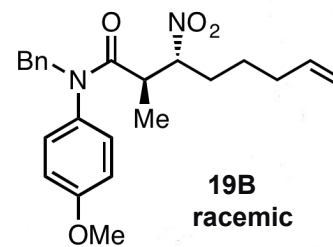

### <Chromatogram>

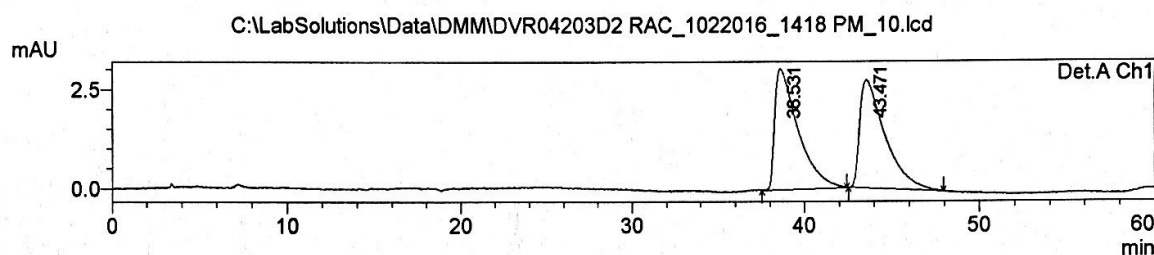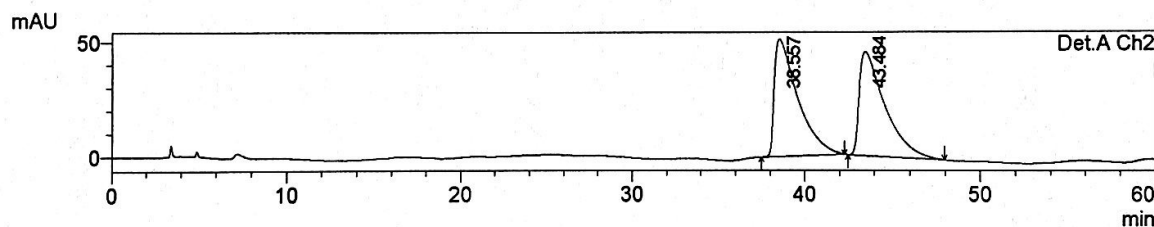

- 1 Det.A Ch1/254nm
- 2 Det.A Ch2/210nm

PeakTable

Detector A Ch1 254nm

| Peak# | Ret. Time | Area   | Height | Area %  | Height % |
|-------|-----------|--------|--------|---------|----------|
| 1     | 38.531    | 283737 | 3051   | 50.830  | 52.782   |
| 2     | 43.471    | 274466 | 2729   | 49.170  | 47.218   |
| Total |           | 558203 | 5780   | 100.000 | 100.000  |

PeakTable

Detector A Ch2 210nm

| Peak# | Ret. Time | Area    | Height | Area %  | Height % |
|-------|-----------|---------|--------|---------|----------|
| 1     | 38.557    | 4806533 | 51199  | 51.067  | 53.053   |
| 2     | 43.484    | 4605717 | 45307  | 48.933  | 46.947   |
| Total |           | 9412251 | 96505  | 100.000 | 100.000  |

## ==== Shimadzu LCsolution Analysis Report ====

C:\LabSolutions\Data\DMM\DVR04203D2\_1022016\_1418 PM\_14.lcd  
 Acquired by : LC User  
 Sample Name : DVR04203D2  
 Sample ID : DVR04203D2  
 Tray# : 1  
 Vail # : 4  
 Injection Volume : 3 uL  
 Data File Name : DVR04203D2\_1022016\_1418 PM\_14.lcd  
 Method File Name : col2\_0.8isoIPA\_60min\_1ml\_254and210.lcm  
 Batch File Name : DMM.lcb  
 Report File Name : Default.lcr  
 Data Acquired : 10/2/2016 7:52:23 PM  
 Data Processed : 10/2/2016 8:52:25 PM

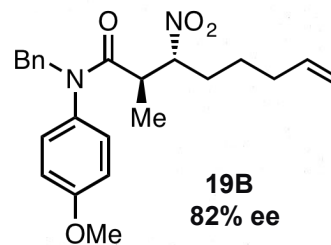

### <Chromatogram>

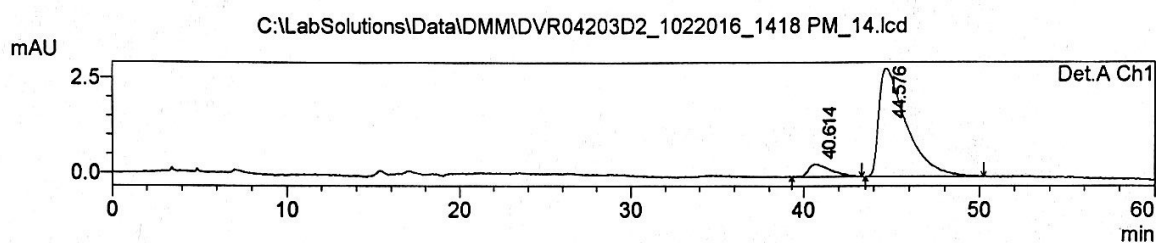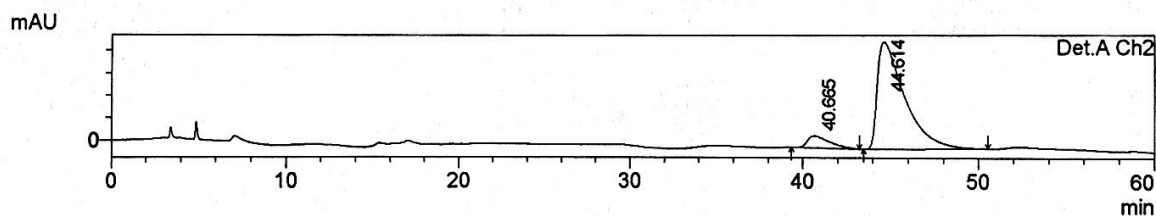

- 1 Det.A Ch1/254nm  
 2 Det.A Ch2/210nm

PeakTable

Detector A Ch1 254nm

| Peak# | Ret. Time | Area   | Height | Area %  | Height % |
|-------|-----------|--------|--------|---------|----------|
| 1     | 40.614    | 29603  | 330    | 8.822   | 10.432   |
| 2     | 44.576    | 305968 | 2835   | 91.178  | 89.568   |
| Total |           | 335571 | 3165   | 100.000 | 100.000  |

PeakTable

Detector A Ch2 210nm

| Peak# | Ret. Time | Area    | Height | Area %  | Height % |
|-------|-----------|---------|--------|---------|----------|
| 1     | 40.665    | 474842  | 5394   | 8.388   | 10.157   |
| 2     | 44.614    | 5186184 | 47717  | 91.612  | 89.843   |
| Total |           | 5661027 | 53111  | 100.000 | 100.000  |

## ==== Shimadzu LCsolution Analysis Report ====

C:\LabSolutions\Data\DMM\DVR04211 RAC D1\_1082016\_2042 PM\_2.lcd  
 Acquired by : LC User  
 Sample Name : DVR04211 RAC D1  
 Sample ID : DVR04211 RAC D1  
 Tray# : 1  
 Vial # : 1  
 Injection Volume : 2 uL  
 Data File Name : DVR04211 RAC D1\_1082016\_2042 PM\_2.lcd  
 Method File Name : col3\_2isoIPA\_20min\_1ML\_220and210.lcm  
 Batch File Name : DMM.lcb  
 Report File Name : Default.lcr  
 Data Acquired : 10/8/2016 9:03:01 PM  
 Data Processed : 10/8/2016 9:23:01 PM

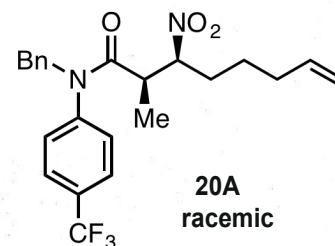

### <Chromatogram>

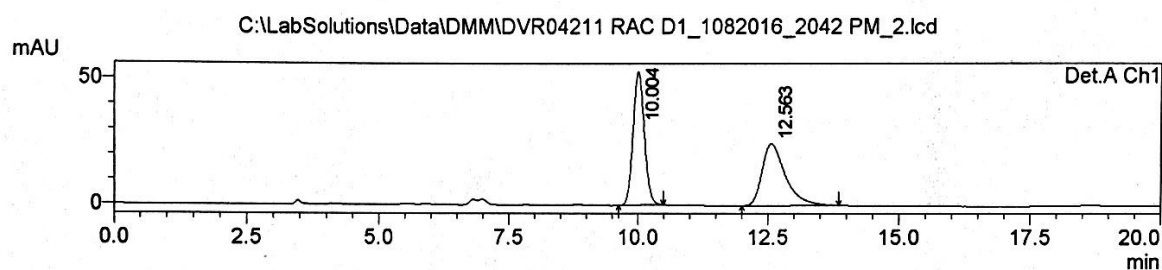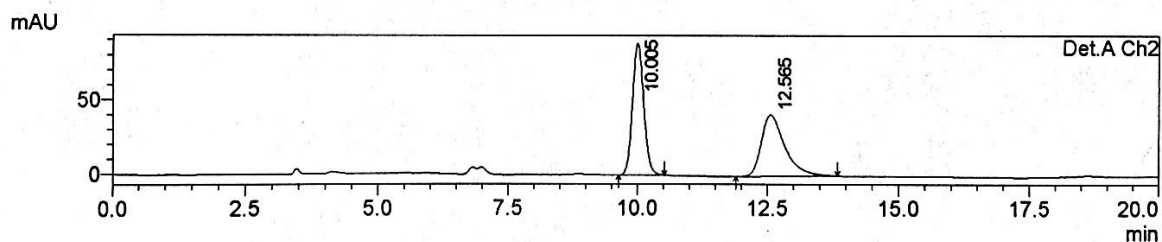

1 Det.A Ch1/220nm  
 2 Det.A Ch2/210nm

PeakTable

Detector A Ch1 220nm

| Peak# | Ret. Time | Area    | Height | Area %  | Height % |
|-------|-----------|---------|--------|---------|----------|
| 1     | 10.004    | 802330  | 53218  | 50.985  | 68.246   |
| 2     | 12.563    | 771334  | 24762  | 49.015  | 31.754   |
| Total |           | 1573665 | 77980  | 100.000 | 100.000  |

PeakTable

Detector A Ch2 210nm

| Peak# | Ret. Time | Area    | Height | Area %  | Height % |
|-------|-----------|---------|--------|---------|----------|
| 1     | 10.005    | 1348201 | 89182  | 50.972  | 68.225   |
| 2     | 12.565    | 1296787 | 41535  | 49.028  | 31.775   |
| Total |           | 2644988 | 130717 | 100.000 | 100.000  |

## ==== Shimadzu LCsolution Analysis Report ====

C:\LabSolutions\Data\DMM\DVR04211 D1\_1082016\_2042 PM\_6.lcd  
 Acquired by : LC User  
 Sample Name : DVR04211 D1  
 Sample ID : DVR04211 D1  
 Tray# : 1  
 Vial # : 2  
 Injection Volume : 2 uL  
 Data File Name : DVR04211 D1\_1082016\_2042 PM\_6.lcd  
 Method File Name : col3\_2isolPA\_20min\_1ML\_220and210.lcm  
 Batch File Name : DMM.lcb  
 Report File Name : Default.lcr  
 Data Acquired : 10/8/2016 9:53:54 PM  
 Data Processed : 10/8/2016 10:13:55 PM

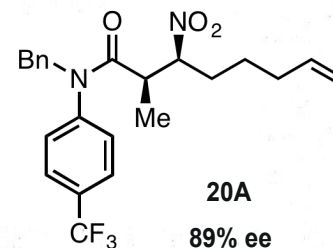

### <Chromatogram>

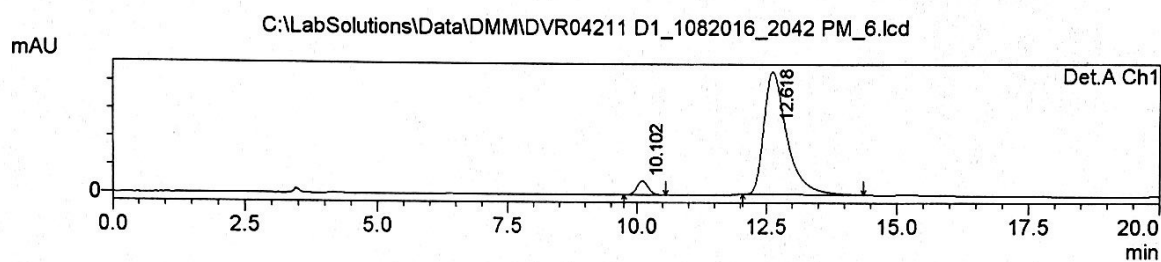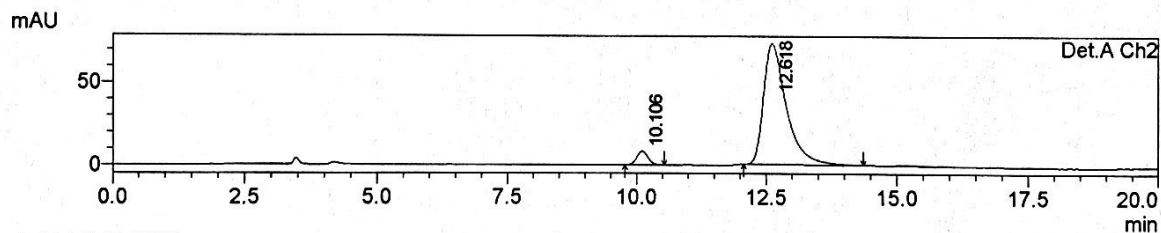

1 Det.A Ch1/220nm  
 2 Det.A Ch2/210nm

PeakTable

Detector A Ch1 220nm

| Peak# | Ret. Time | Area    | Height | Area %  | Height % |
|-------|-----------|---------|--------|---------|----------|
| 1     | 10.102    | 75639   | 5029   | 5.271   | 10.226   |
| 2     | 12.618    | 1359251 | 44152  | 94.729  | 89.774   |
| Total |           | 1434890 | 49181  | 100.000 | 100.000  |

PeakTable

Detector A Ch2 210nm

| Peak# | Ret. Time | Area    | Height | Area %  | Height % |
|-------|-----------|---------|--------|---------|----------|
| 1     | 10.106    | 126593  | 8417   | 5.283   | 10.226   |
| 2     | 12.618    | 2269788 | 73897  | 94.717  | 89.774   |
| Total |           | 2396380 | 82314  | 100.000 | 100.000  |



# ==== Shimadzu LCsolution Analysis Report ====

C:\LabSolutions\Data\DMM\DVR04211 RAC D2\_1082016\_2042 PM\_10.lcd  
 Acquired by : LC User  
 Sample Name : DVR04211 RAC D2  
 Sample ID : DVR04211 RAC D2  
 Tray# : 1  
 Vial # : 3  
 Injection Volume : 2 uL  
 Data File Name : DVR04211 RAC D2\_1082016\_2042 PM\_10.lcd  
 Method File Name : col3\_5isoiPA\_45min\_1ML\_220and210.lcm  
 Batch File Name : DMM.lcb  
 Report File Name : Default.lcr  
 Data Acquired : 10/8/2016 11:09:50 PM  
 Data Processed : 10/8/2016 11:54:51 PM

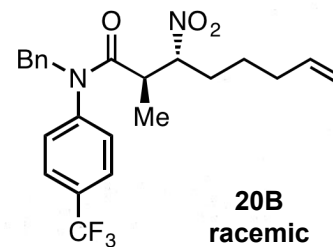

## <Chromatogram>

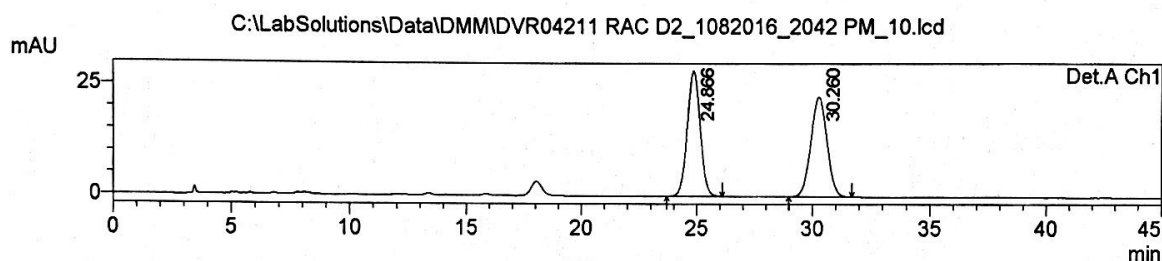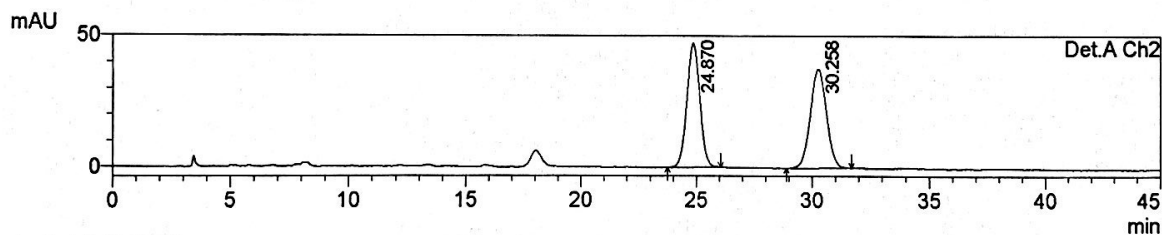

1 Det.A Ch1/220nm  
 2 Det.A Ch2/210nm

### PeakTable

Detector A Ch1 220nm

| Peak#        | Ret. Time | Area           | Height       | Area %         | Height %       |
|--------------|-----------|----------------|--------------|----------------|----------------|
| 1            | 24.866    | 1109817        | 28443        | 50.406         | 55.693         |
| 2            | 30.260    | 1091922        | 22628        | 49.594         | 44.307         |
| <b>Total</b> |           | <b>2201739</b> | <b>51071</b> | <b>100.000</b> | <b>100.000</b> |

### PeakTable

Detector A Ch2 210nm

| Peak#        | Ret. Time | Area           | Height       | Area %         | Height %       |
|--------------|-----------|----------------|--------------|----------------|----------------|
| 1            | 24.870    | 1855855        | 47618        | 50.177         | 55.620         |
| 2            | 30.258    | 1842744        | 37995        | 49.823         | 44.380         |
| <b>Total</b> |           | <b>3698599</b> | <b>85612</b> | <b>100.000</b> | <b>100.000</b> |

# ==== Shimadzu LCsolution Analysis Report ====

C:\LabSolutions\Data\DMM\DVR04211 D2\_1082016\_2042 PM\_14.lcd  
 Acquired by : LC User  
 Sample Name : DVR04211 D2  
 Sample ID : DVR04211 D2  
 Tray# : 1  
 Vial # : 4  
 Injection Volume : 2 uL  
 Data File Name : DVR04211 D2\_1082016\_2042 PM\_14.lcd  
 Method File Name : col3\_5isoiPA\_45min\_1ML\_220and210.lcm  
 Batch File Name : DMM.lcb  
 Report File Name : Default.lcr  
 Data Acquired : 10/9/2016 12:50:45 AM  
 Data Processed : 10/9/2016 1:35:49 AM

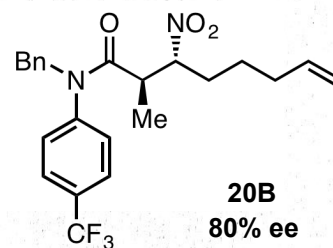

## <Chromatogram>

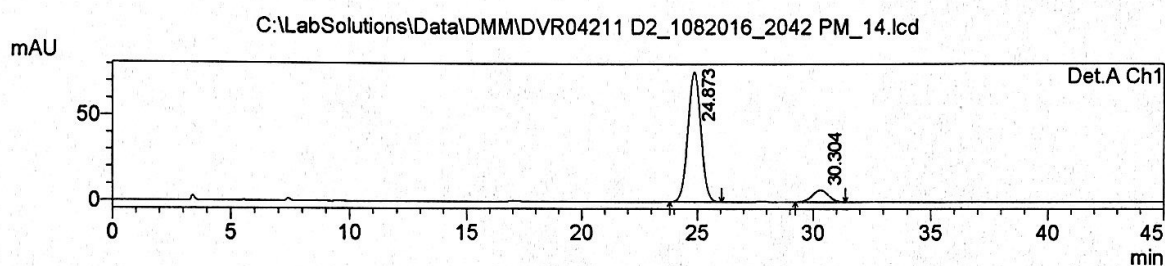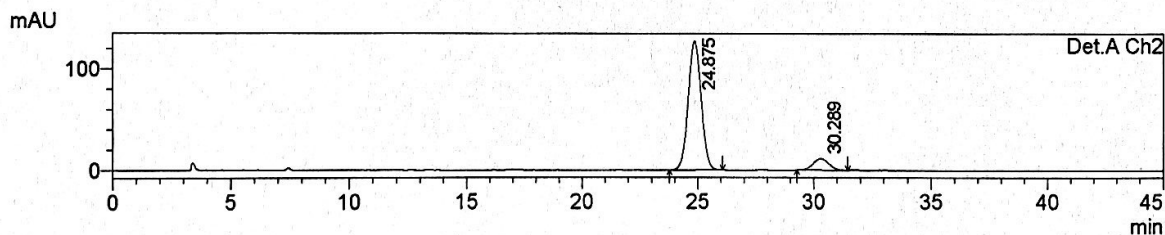

- 1 Det.A Ch1/220nm
- 2 Det.A Ch2/210nm

PeakTable

Detector A Ch1 220nm

| Peak# | Ret. Time | Area    | Height | Area %  | Height % |
|-------|-----------|---------|--------|---------|----------|
| 1     | 24.873    | 2991187 | 76619  | 90.165  | 91.787   |
| 2     | 30.304    | 326271  | 6856   | 9.835   | 8.213    |
| Total |           | 3317458 | 83475  | 100.000 | 100.000  |

PeakTable

Detector A Ch2 210nm

| Peak# | Ret. Time | Area    | Height | Area %  | Height % |
|-------|-----------|---------|--------|---------|----------|
| 1     | 24.875    | 5010876 | 128349 | 90.308  | 91.847   |
| 2     | 30.289    | 537780  | 11394  | 9.692   | 8.153    |
| Total |           | 5548656 | 139742 | 100.000 | 100.000  |

# ==== Shimadzu LCsolution Analysis Report ====

Acquired by : LC User  
 Sample Name : DVR04208 RAC SYN  
 Sample ID : DVR04208 RAC SYN  
 Tray# : 1  
 Vail # : 1  
 Injection Volume : 2 uL  
 Data File Name : DVR04208 RAC SYN\_1052016\_1934 PM\_2.lcd  
 Method File Name : col3\_2isoiPA\_30min\_1ML\_220and210.lcm  
 Batch File Name : DMM.lcb  
 Report File Name : Default.lcr  
 Data Acquired : 10/5/2016 8:04:47 PM  
 Data Processed : 10/5/2016 8:34:50 PM

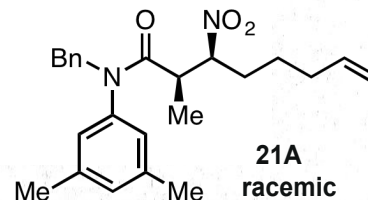

## <Chromatogram>

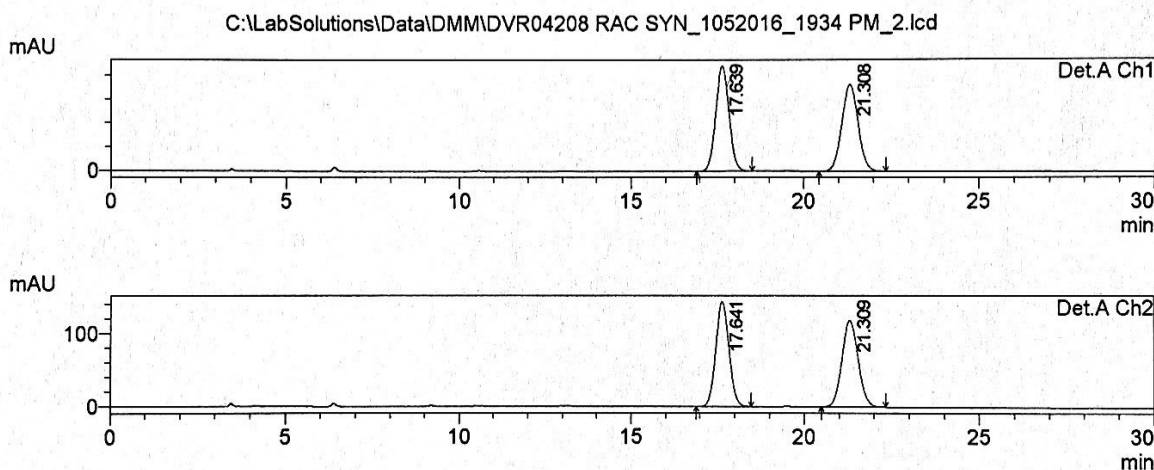

PeakTable

Detector A Ch1 220nm

| Peak# | Ret. Time | Area    | Height | Area %  | Height % |
|-------|-----------|---------|--------|---------|----------|
| 1     | 17.639    | 2341462 | 88122  | 49.919  | 54.847   |
| 2     | 21.308    | 2349054 | 72547  | 50.081  | 45.153   |
| Total |           | 4690517 | 160669 | 100.000 | 100.000  |

PeakTable

Detector A Ch2 210nm

| Peak# | Ret. Time | Area    | Height | Area %  | Height % |
|-------|-----------|---------|--------|---------|----------|
| 1     | 17.641    | 3828553 | 144185 | 49.931  | 54.846   |
| 2     | 21.309    | 3839066 | 118705 | 50.069  | 45.154   |
| Total |           | 7667619 | 262890 | 100.000 | 100.000  |

## ==== Shimadzu LCsolution Analysis Report ====

C:\LabSolutions\Data\DMM\DVR04208 SYN\_1052016\_1934 PM\_6.lcd  
 Acquired by : LC User  
 Sample Name : DVR04208 SYN  
 Sample ID : DVR04208 SYN  
 Tray# : 1  
 Vail # : 2  
 Injection Volume : 2 uL  
 Data File Name : DVR04208 SYN\_1052016\_1934 PM\_6.lcd  
 Method File Name : col3\_2isoiPA\_30min\_1ML\_220and210.lcm  
 Batch File Name : DMM.lcb  
 Report File Name : Default.lcr  
 Data Acquired : 10/5/2016 9:15:42 PM  
 Data Processed : 10/5/2016 9:45:44 PM

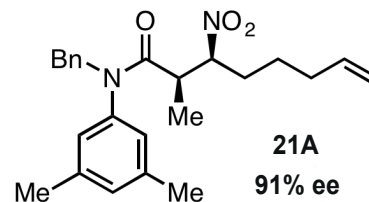

### <Chromatogram>

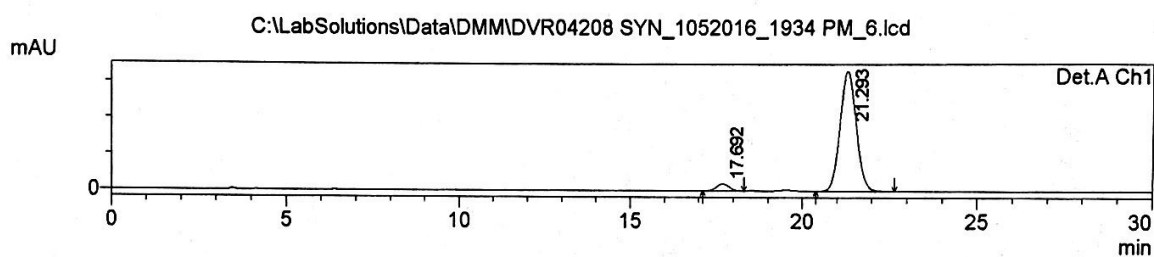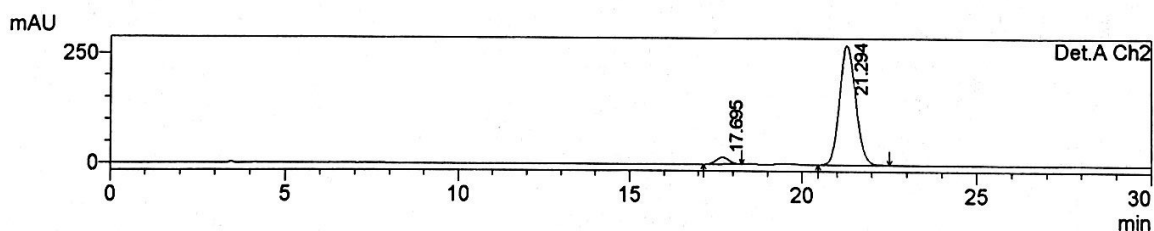

- 1 Det.A Ch1/220nm
- 2 Det.A Ch2/210nm

PeakTable

Detector A Ch1 220nm

| Peak# | Ret. Time | Area    | Height | Area %  | Height % |
|-------|-----------|---------|--------|---------|----------|
| 1     | 17.692    | 244609  | 9507   | 4.360   | 5.410    |
| 2     | 21.293    | 5366253 | 166221 | 95.640  | 94.590   |
| Total |           | 5610862 | 175728 | 100.000 | 100.000  |

PeakTable

Detector A Ch2 210nm

| Peak# | Ret. Time | Area    | Height | Area %  | Height % |
|-------|-----------|---------|--------|---------|----------|
| 1     | 17.695    | 399783  | 15548  | 4.355   | 5.400    |
| 2     | 21.294    | 8780463 | 272387 | 95.645  | 94.600   |
| Total |           | 9180246 | 287934 | 100.000 | 100.000  |

## ==== Shimadzu LCsolution Analysis Report ====

C:\LabSolutions\Data\DMMDVR04208 rac d2\_1062016\_1716 PM\_2.lcd  
 Acquired by : LC User  
 Sample Name : DVR04208 rac d2  
 Sample ID : DVR04208 rac d2  
 Tray# : 1  
 Vial # : 2  
 Injection Volume : 3 uL  
 Data File Name : DVR04208 rac d2\_1062016\_1716 PM\_2.lcd  
 Method File Name : col3\_8isolPA\_60min\_1mL\_254and280.lcm  
 Batch File Name : DMM.lcb  
 Report File Name : Default.lcr  
 Data Acquired : 10/6/2016 5:46:50 PM  
 Data Processed : 10/6/2016 6:46:53 PM

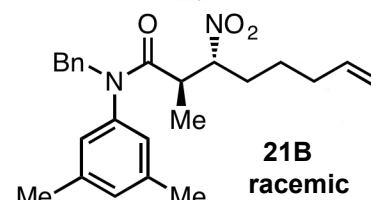

### <Chromatogram>

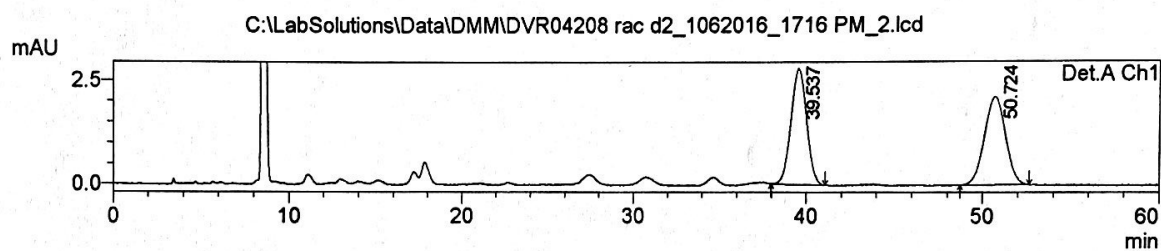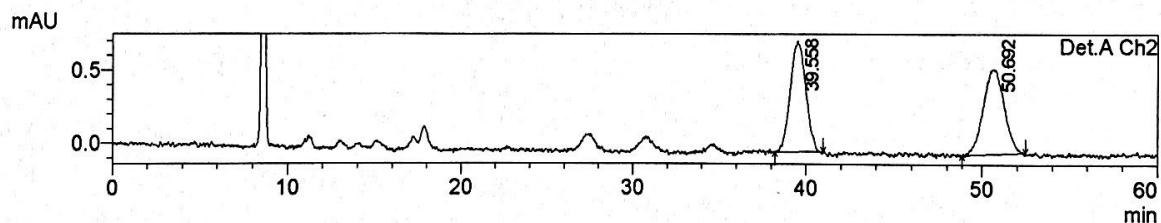

- 1 Det.A Ch1/254nm
- 2 Det.A Ch2/280nm

PeakTable

Detector A Ch1 254nm

| Peak# | Ret. Time | Area   | Height | Area %  | Height % |
|-------|-----------|--------|--------|---------|----------|
| 1     | 39.537    | 173539 | 2778   | 49.844  | 56.853   |
| 2     | 50.724    | 174629 | 2108   | 50.156  | 43.147   |
| Total |           | 348168 | 4886   | 100.000 | 100.000  |

PeakTable

Detector A Ch2 280nm

| Peak# | Ret. Time | Area  | Height | Area %  | Height % |
|-------|-----------|-------|--------|---------|----------|
| 1     | 39.558    | 46436 | 760    | 49.192  | 56.765   |
| 2     | 50.692    | 47963 | 578    | 50.808  | 43.235   |
| Total |           | 94399 | 1338   | 100.000 | 100.000  |



# ==== Shimadzu LCsolution Analysis Report ====

C:\LabSolutions\Data\DMM\DVR04208 D2\_1062016\_1716 PM\_6.lcd  
 Acquired by : LC User  
 Sample Name : DVR04208 D2  
 Sample ID : DVR04208 D2  
 Tray# : 1  
 Vial # : 3  
 Injection Volume : 3 uL  
 Data File Name : DVR04208 D2\_1062016\_1716 PM\_6.lcd  
 Method File Name : col3\_8isolPA\_60min\_1mL\_254and280.lcm  
 Batch File Name : DMM.lcb  
 Report File Name : Default.lcr  
 Data Acquired : 10/6/2016 7:27:44 PM  
 Data Processed : 10/6/2016 8:27:45 PM

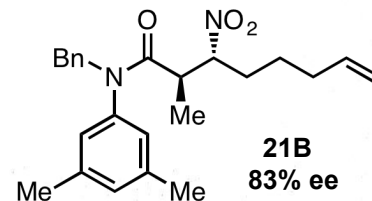

## <Chromatogram>

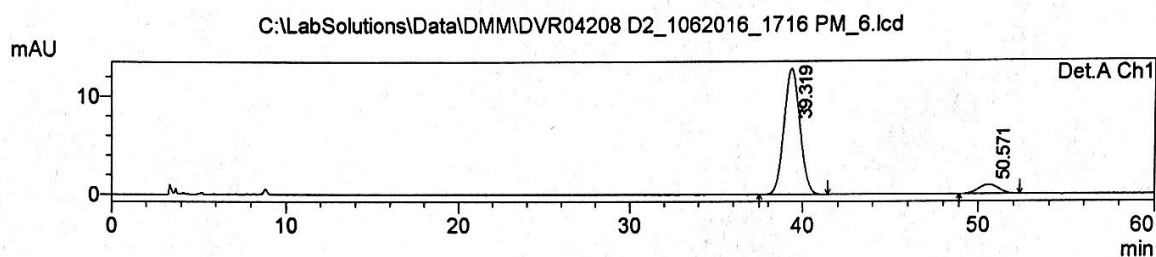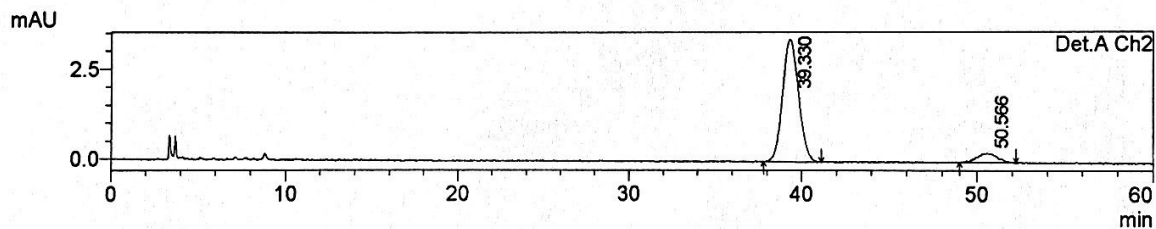

1 Det.A Ch1/254nm  
 2 Det.A Ch2/280nm

PeakTable

Detector A Ch1 254nm

| Peak# | Ret. Time | Area   | Height | Area %  | Height % |
|-------|-----------|--------|--------|---------|----------|
| 1     | 39.319    | 813272 | 12797  | 91.477  | 93.159   |
| 2     | 50.571    | 75775  | 940    | 8.523   | 6.841    |
| Total |           | 889047 | 13736  | 100.000 | 100.000  |

PeakTable

Detector A Ch2 280nm

| Peak# | Ret. Time | Area   | Height | Area %  | Height % |
|-------|-----------|--------|--------|---------|----------|
| 1     | 39.330    | 219035 | 3412   | 91.165  | 92.897   |
| 2     | 50.566    | 21228  | 261    | 8.835   | 7.103    |
| Total |           | 240263 | 3673   | 100.000 | 100.000  |

## ==== Shimadzu LCsolution Analysis Report ====

C:\LabSolutions\Data\DMM\DVR04150 RAC SYN 1\_822016\_841 AM\_25.lcd  
 Acquired by : LC User  
 Sample Name : DVR04150 RAC SYN 1  
 Sample ID : DVR04150 RAC SYN 1  
 Tray# : 1  
 Vial # : 3  
 Injection Volume : 1 uL  
 Data File Name : DVR04150 RAC SYN 1\_822016\_841 AM\_25.lcd  
 Method File Name : col3\_3isoiPA\_20min\_1ML\_220and210.lcm  
 Batch File Name : DMM.lcb  
 Report File Name : Default.lcr  
 Data Acquired : 8/2/2016 7:37:05 PM  
 Data Processed : 8/2/2016 7:57:07 PM

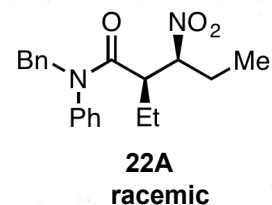

### <Chromatogram>

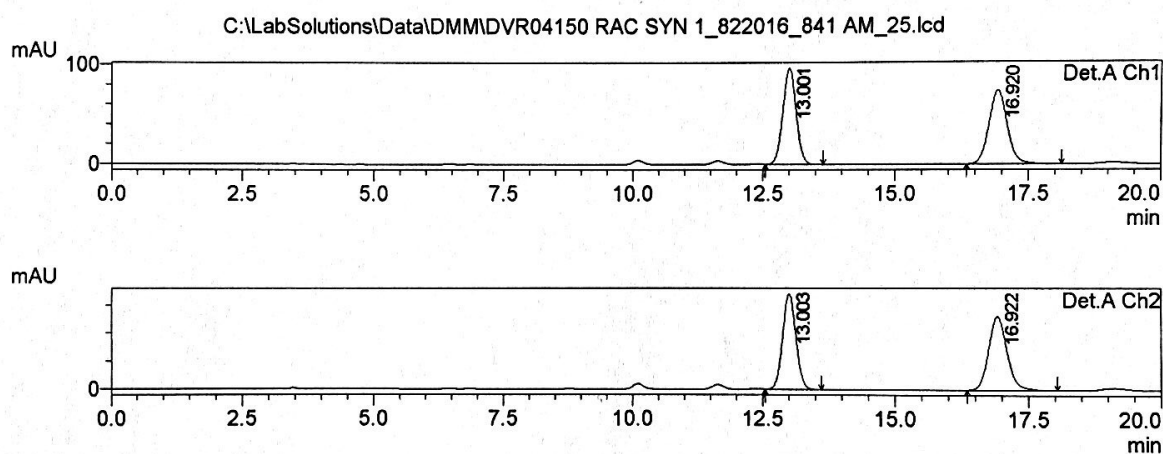

- 1 Det.A Ch1/220nm
- 2 Det.A Ch2/210nm

PeakTable

Detector A Ch1 220nm

| Peak# | Ret. Time | Area    | Height | Area %  | Height % |
|-------|-----------|---------|--------|---------|----------|
| 1     | 13.001    | 1683886 | 96541  | 48.958  | 56.693   |
| 2     | 16.920    | 1755548 | 73745  | 51.042  | 43.307   |
| Total |           | 3439434 | 170286 | 100.000 | 100.000  |

PeakTable

Detector A Ch2 210nm

| Peak# | Ret. Time | Area    | Height | Area %  | Height % |
|-------|-----------|---------|--------|---------|----------|
| 1     | 13.003    | 2977086 | 170612 | 48.719  | 56.656   |
| 2     | 16.922    | 3133617 | 130525 | 51.281  | 43.344   |
| Total |           | 6110703 | 301138 | 100.000 | 100.000  |

# ==== Shimadzu LCsolution Analysis Report ====

C:\LabSolutions\Data\DMMDVR04150 SYN 1\_822016\_841 AM\_29.lcd  
 Acquired by : LC User  
 Sample Name : DVR04150 SYN 1  
 Sample ID : DVR04150 SYN 1  
 Tray# : 1  
 Vail # : 4  
 Injection Volume : 1 uL  
 Data File Name : DVR04150 SYN 1\_822016\_841 AM\_29.lcd  
 Method File Name : col3\_3isoiPA\_20min\_1ML\_220and210.lcm  
 Batch File Name : DMM.lcb  
 Report File Name : Default.lcr  
 Data Acquired : 8/2/2016 8:28:03 PM  
 Data Processed : 8/2/2016 8:48:05 PM

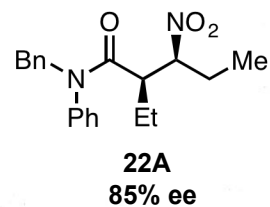

## <Chromatogram>

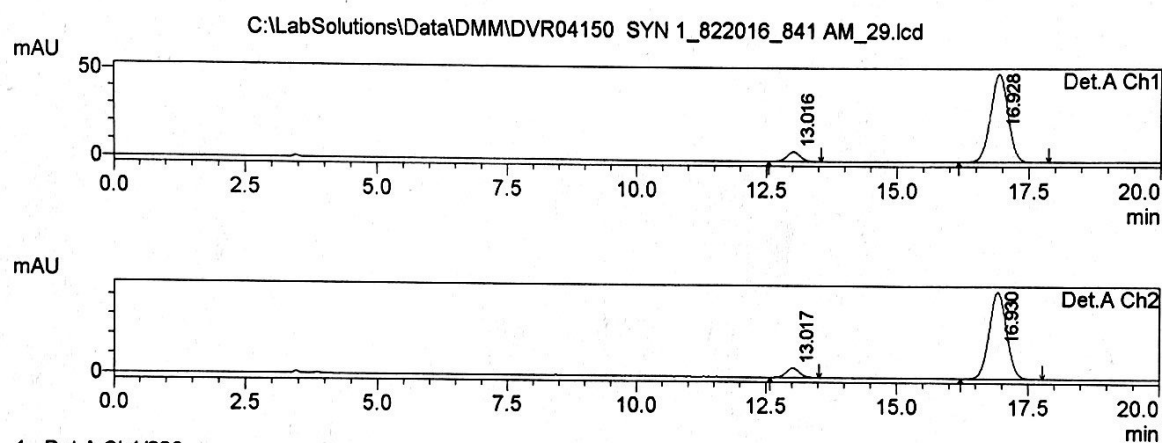

PeakTable

Detector A Ch1 220nm

| Peak# | Ret. Time | Area    | Height | Area %  | Height % |
|-------|-----------|---------|--------|---------|----------|
| 1     | 13.016    | 94791   | 5413   | 7.531   | 9.707    |
| 2     | 16.928    | 1163865 | 50348  | 92.469  | 90.293   |
| Total |           | 1258656 | 55761  | 100.000 | 100.000  |

PeakTable

Detector A Ch2 210nm

| Peak# | Ret. Time | Area    | Height | Area %  | Height % |
|-------|-----------|---------|--------|---------|----------|
| 1     | 13.017    | 166990  | 9557   | 7.511   | 9.698    |
| 2     | 16.930    | 2056243 | 88980  | 92.489  | 90.302   |
| Total |           | 2223234 | 98536  | 100.000 | 100.000  |



## ==== Shimadzu LCsolution Analysis Report ====

Acquired by : LC User  
 Sample Name : DVR04150 RAC ANTI 1  
 Sample ID : DVR04150 RAC ANTI 1  
 Tray# : 1  
 Vail # : 1  
 Injection Volume : 1 uL  
 Data File Name : DVR04150 RAC ANTI 1\_812016\_1017 AM\_1.lcd  
 Method File Name : col6\_3isoiPA\_30min\_1ML\_220and210.lcm  
 Batch File Name : DMM.lcb  
 Report File Name : Default.lcr  
 Data Acquired : 8/1/2016 10:48:37 AM  
 Data Processed : 8/1/2016 11:18:39 AM

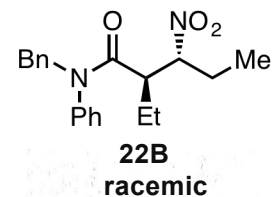

### <Chromatogram>

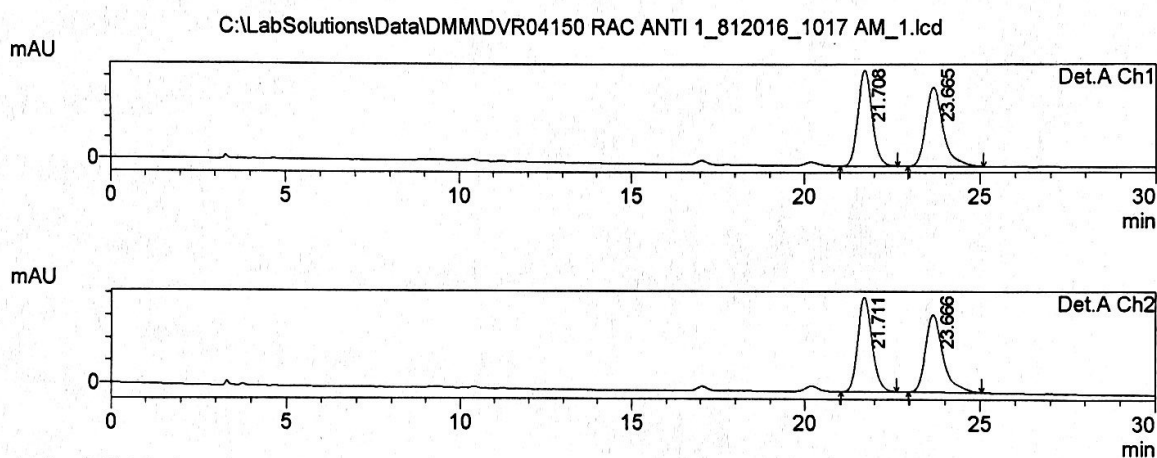

PeakTable

Detector A Ch1 220nm

| Peak# | Ret. Time | Area    | Height | Area %  | Height % |
|-------|-----------|---------|--------|---------|----------|
| 1     | 21.708    | 648485  | 23201  | 49.674  | 54.878   |
| 2     | 23.665    | 656990  | 19076  | 50.326  | 45.122   |
| Total |           | 1305475 | 42277  | 100.000 | 100.000  |

PeakTable

Detector A Ch2 210nm

| Peak# | Ret. Time | Area    | Height | Area %  | Height % |
|-------|-----------|---------|--------|---------|----------|
| 1     | 21.711    | 1182722 | 41875  | 49.776  | 54.948   |
| 2     | 23.666    | 1193362 | 34333  | 50.224  | 45.052   |
| Total |           | 2376083 | 76208  | 100.000 | 100.000  |

## ==== Shimadzu LCsolution Analysis Report ====

C:\LabSolutions\Data\DMM\DVR04150 ANTI\_812016\_1017 AM\_2.lcd  
 Acquired by : LC User  
 Sample Name : DVR04150 ANTI  
 Sample ID : DVR04150 ANTI  
 Tray# : 1  
 Vail # : 2  
 Injection Volume : 1 uL  
 Data File Name : DVR04150 ANTI\_812016\_1017 AM\_2.lcd  
 Method File Name : col6\_3isoiPA\_30min\_1ML\_220and210.lcm  
 Batch File Name : DMM.lcb  
 Report File Name : Default.lcr  
 Data Acquired : 8/1/2016 11:19:14 AM  
 Data Processed : 8/1/2016 11:49:14 AM

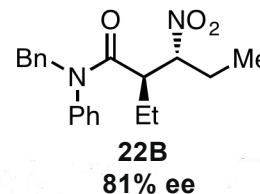

### <Chromatogram>

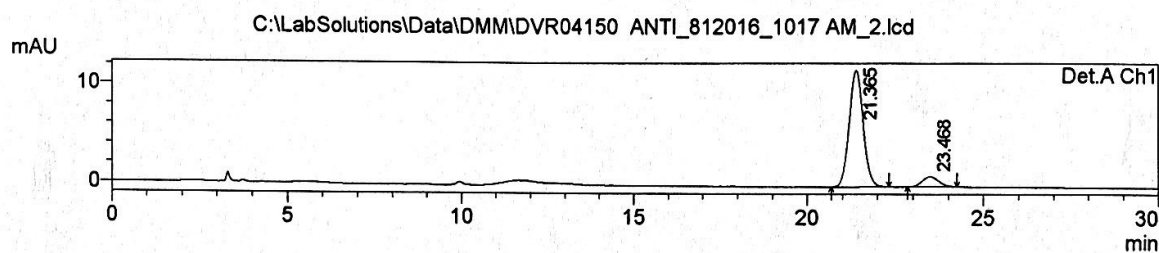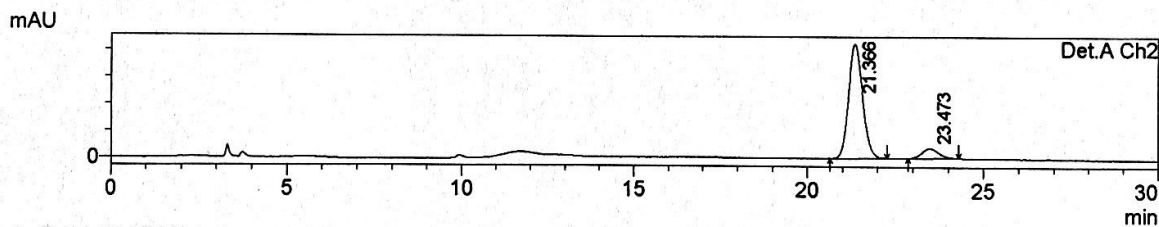

- 1 Det.A Ch1/220nm
- 2 Det.A Ch2/210nm

PeakTable

Detector A Ch1 220nm

| Peak# | Ret. Time | Area   | Height | Area %  | Height % |
|-------|-----------|--------|--------|---------|----------|
| 1     | 21.365    | 326032 | 11828  | 90.671  | 92.066   |
| 2     | 23.468    | 33547  | 1019   | 9.329   | 7.934    |
| Total |           | 359579 | 12847  | 100.000 | 100.000  |

PeakTable

Detector A Ch2 210nm

| Peak# | Ret. Time | Area   | Height | Area %  | Height % |
|-------|-----------|--------|--------|---------|----------|
| 1     | 21.366    | 585715 | 21277  | 90.446  | 92.013   |
| 2     | 23.473    | 61872  | 1847   | 9.554   | 7.987    |
| Total |           | 647587 | 23124  | 100.000 | 100.000  |

## ==== Shimadzu LCsolution Analysis Report ====

C:\LabSolutions\Data\DMMRS-01-240-RES\_10122016\_1001 AM\_2.lcd  
 Acquired by : LC User  
 Sample Name : RS-01-240-RES  
 Sample ID : RS-01-240-RES  
 Tray# : 1  
 Vial # : 91  
 Injection Volume : 2 uL  
 Data File Name : RS-01-240-RES\_10122016\_1001 AM\_2.lcd  
 Method File Name : col5\_3isoiPA\_60min\_1.0ML\_254and210.lcm  
 Batch File Name : DMM.lcb  
 Report File Name : Default.lcr  
 Data Acquired : 10/12/2016 10:16:44 AM  
 Data Processed : 10/12/2016 11:16:45 AM

### <Chromatogram>

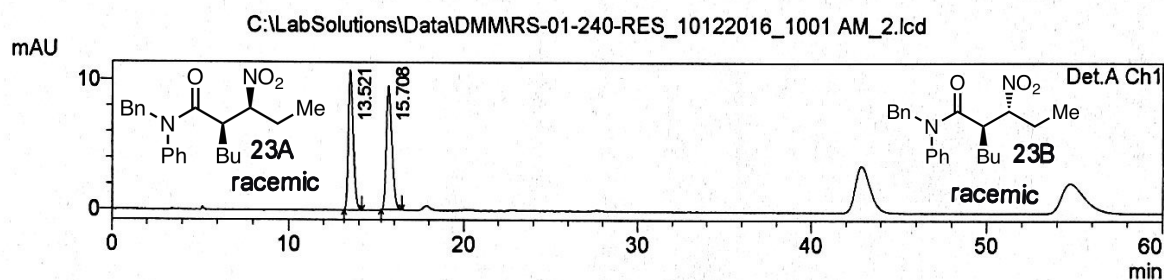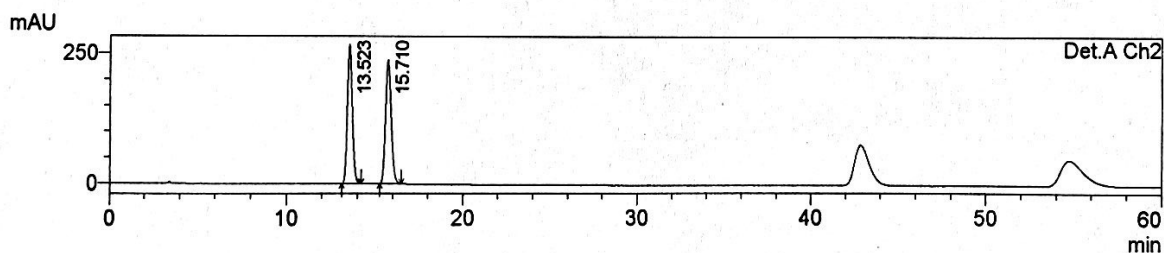

1 Det.A Ch1/254nm  
 2 Det.A Ch2/210nm

PeakTable

Detector A Ch1 254nm

| Peak# | Ret. Time | Area   | Height | Area %  | Height % |
|-------|-----------|--------|--------|---------|----------|
| 1     | 13.521    | 208119 | 10773  | 49.292  | 52.984   |
| 2     | 15.708    | 214099 | 9559   | 50.708  | 47.016   |
| Total |           | 422218 | 20332  | 100.000 | 100.000  |

PeakTable

Detector A Ch2 210nm

| Peak# | Ret. Time | Area     | Height | Area %  | Height % |
|-------|-----------|----------|--------|---------|----------|
| 1     | 13.523    | 5197100  | 268121 | 49.269  | 52.943   |
| 2     | 15.710    | 5351355  | 238314 | 50.731  | 47.057   |
| Total |           | 10548455 | 506435 | 100.000 | 100.000  |



## ==== Shimadzu LCsolution Analysis Report ====

C:\LabSolutions\Data\DMM\RS-01-229-final\_10122016\_1001 AM\_3.lcd  
 Acquired by : LC User  
 Sample Name : RS-01-229-final  
 Sample ID : RS-01-229-final  
 Tray# : 1  
 Vial # : 92  
 Injection Volume : 3 uL  
 Data File Name : RS-01-229-final\_10122016\_1001 AM\_3.lcd  
 Method File Name : col5\_3isoiPA\_60min\_1.0ML\_254and210.lcm  
 Batch File Name : DMM.lcb  
 Report File Name : Default.lcr  
 Data Acquired : 10/12/2016 11:17:19 AM  
 Data Processed : 10/12/2016 12:17:22 PM

### <Chromatogram>

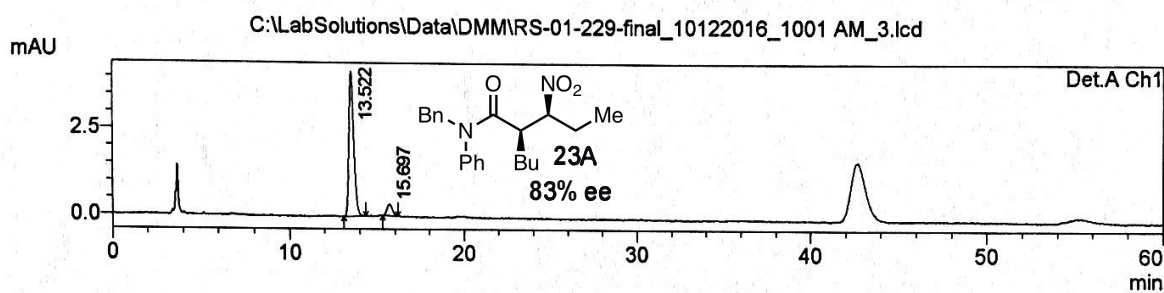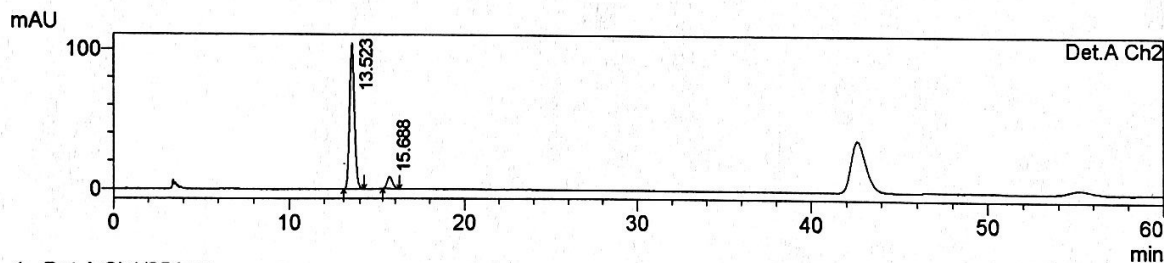

- 1 Det.A Ch1/254nm
- 2 Det.A Ch2/210nm

PeakTable

Detector A Ch1 254nm

| Peak# | Ret. Time | Area  | Height | Area %  | Height % |
|-------|-----------|-------|--------|---------|----------|
| 1     | 13.522    | 80975 | 4207   | 91.552  | 92.401   |
| 2     | 15.697    | 7472  | 346    | 8.448   | 7.599    |
| Total |           | 88447 | 4553   | 100.000 | 100.000  |

PeakTable

Detector A Ch2 210nm

| Peak# | Ret. Time | Area    | Height | Area %  | Height % |
|-------|-----------|---------|--------|---------|----------|
| 1     | 13.523    | 2016783 | 105053 | 91.495  | 92.403   |
| 2     | 15.688    | 187468  | 8638   | 8.505   | 7.597    |
| Total |           | 2204252 | 113690 | 100.000 | 100.000  |

## ==== Shimadzu LCsolution Analysis Report ====

C:\LabSolutions\Data\DMMRS-01-240-RES\_10122016\_1001 AM\_2.lcd  
 Acquired by : LC User  
 Sample Name : RS-01-240-RES  
 Sample ID : RS-01-240-RES  
 Tray# : 1  
 Vial # : 91  
 Injection Volume : 2 uL  
 Data File Name : RS-01-240-RES\_10122016\_1001 AM\_2.lcd  
 Method File Name : col5\_3isoiPA\_60min\_1.0ML\_254and210.lcm  
 Batch File Name : DMM.lcb  
 Report File Name : Default.lcr  
 Data Acquired : 10/12/2016 10:16:44 AM  
 Data Processed : 10/12/2016 12:20:03 PM

### <Chromatogram>

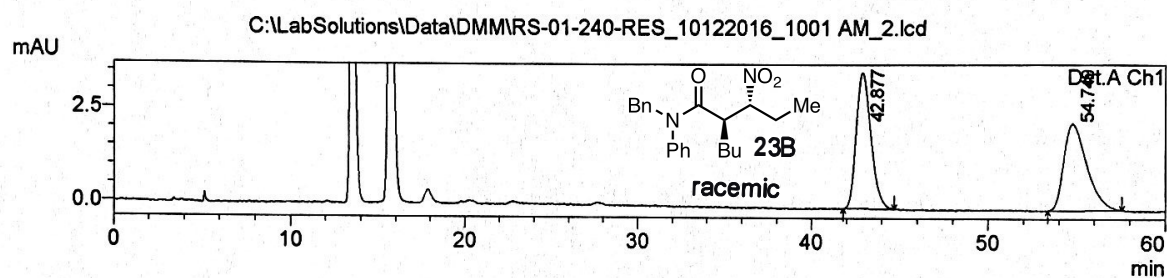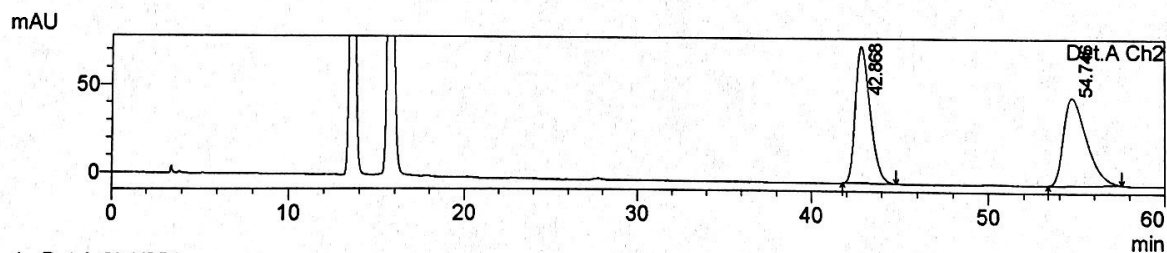

1 Det.A Ch1/254nm  
 2 Det.A Ch2/210nm

PeakTable

Detector A Ch1 254nm

| Peak# | Ret. Time | Area   | Height | Area %  | Height % |
|-------|-----------|--------|--------|---------|----------|
| 1     | 42.877    | 211348 | 3617   | 50.119  | 60.969   |
| 2     | 54.749    | 210348 | 2316   | 49.881  | 39.031   |
| Total |           | 421696 | 5933   | 100.000 | 100.000  |

PeakTable

Detector A Ch2 210nm

| Peak# | Ret. Time | Area    | Height | Area %  | Height % |
|-------|-----------|---------|--------|---------|----------|
| 1     | 42.868    | 4542037 | 78030  | 50.118  | 61.045   |
| 2     | 54.746    | 4520585 | 49793  | 49.882  | 38.955   |
| Total |           | 9062621 | 127824 | 100.000 | 100.000  |

# ==== Shimadzu LCsolution Analysis Report ====

C:\LabSolutions\Data\DMM\RS-01-229-final\_10122016\_1001 AM\_3.lcd  
 Acquired by : LC User  
 Sample Name : RS-01-229-final  
 Sample ID : RS-01-229-final  
 Tray# : 1  
 Vial # : 92  
 Injection Volume : 3 uL  
 Data File Name : RS-01-229-final\_10122016\_1001 AM\_3.lcd  
 Method File Name : col5\_3isoiPA\_60min\_1.0ML\_254and210.lcm  
 Batch File Name : DMM.lcb  
 Report File Name : Default.lcr  
 Data Acquired : 10/12/2016 11:17:19 AM  
 Data Processed : 10/12/2016 12:17:22 PM

## <Chromatogram>

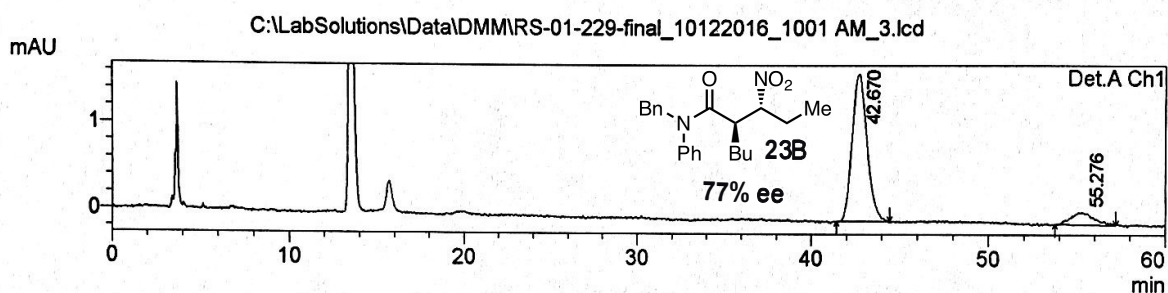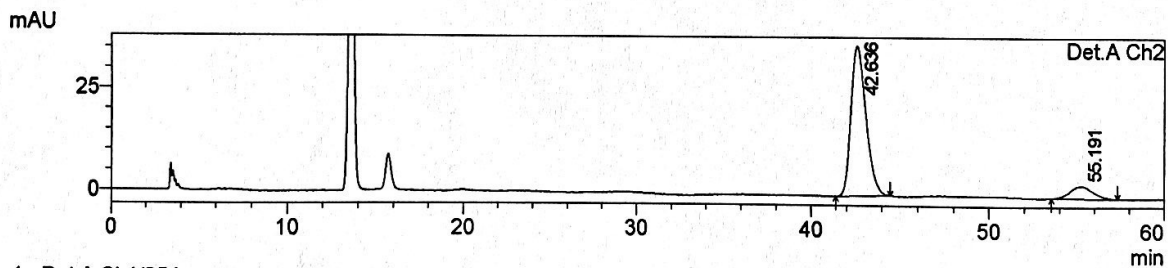

1 Det.A Ch1/254nm  
 2 Det.A Ch2/210nm

PeakTable

Detector A Ch1 254nm

| Peak# | Ret. Time | Area   | Height | Area %  | Height % |
|-------|-----------|--------|--------|---------|----------|
| 1     | 42.670    | 99819  | 1699   | 88.563  | 92.074   |
| 2     | 55.276    | 12891  | 146    | 11.437  | 7.926    |
| Total |           | 112709 | 1845   | 100.000 | 100.000  |

PeakTable

Detector A Ch2 210nm

| Peak# | Ret. Time | Area    | Height | Area %  | Height % |
|-------|-----------|---------|--------|---------|----------|
| 1     | 42.636    | 2163440 | 36678  | 88.746  | 92.388   |
| 2     | 55.191    | 274361  | 3022   | 11.254  | 7.612    |
| Total |           | 2437801 | 39700  | 100.000 | 100.000  |

# ==== Shimadzu LCsolution Analysis Report ====

C:\LabSolutions\Data\DMM\DVR05049RAC\_382017\_955 AM\_5.lcd  
 Acquired by : LC User  
 Sample Name : DVR05049RAC  
 Sample ID : DVR05049RAC  
 Tray# : 1  
 Vial # : 1  
 Injection Volume : 3 uL  
 Data File Name : DVR05049RAC\_382017\_955 AM\_5.lcd  
 Method File Name : col1\_1isoIPA\_30min\_1ML\_254and210.lcm  
 Batch File Name : DMM.lcb  
 Report File Name : Default.lcr  
 Data Acquired : 3/8/2017 12:48:27 PM  
 Data Processed : 3/8/2017 1:18:28 PM

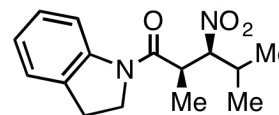

**24**  
racemic

## <Chromatogram>

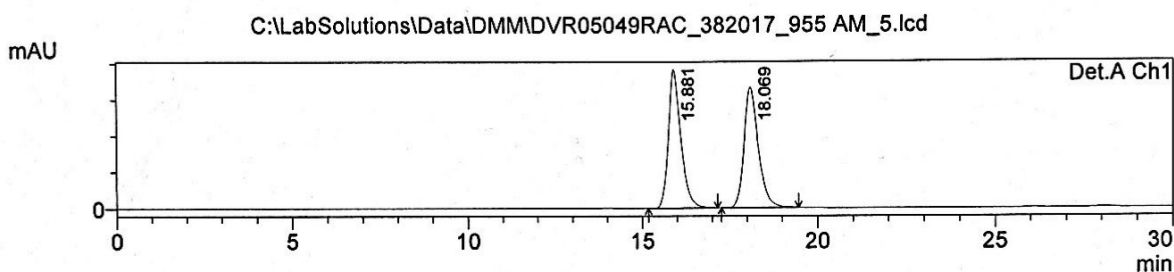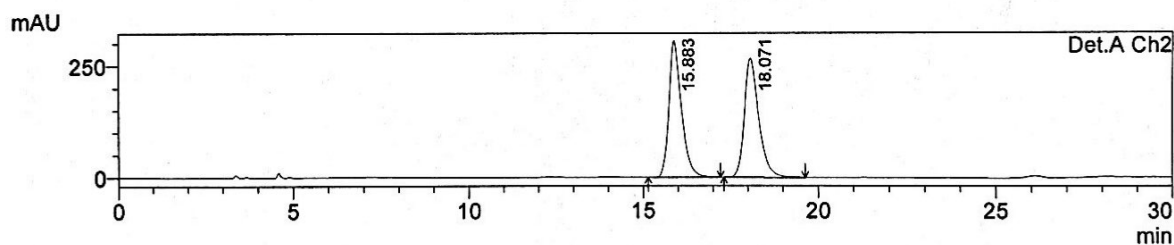

- 1 Det.A Ch1/254nm  
 2 Det.A Ch2/210nm

PeakTable

Detector A Ch1 254nm

| Peak# | Ret. Time | Area    | Height | Area %  | Height % |
|-------|-----------|---------|--------|---------|----------|
| 1     | 15.881    | 4746999 | 191118 | 50.154  | 53.475   |
| 2     | 18.069    | 4717929 | 166282 | 49.846  | 46.525   |
| Total |           | 9464928 | 357400 | 100.000 | 100.000  |

PeakTable

Detector A Ch2 210nm

| Peak# | Ret. Time | Area     | Height | Area %  | Height % |
|-------|-----------|----------|--------|---------|----------|
| 1     | 15.883    | 7628150  | 306467 | 50.087  | 53.427   |
| 2     | 18.071    | 7601695  | 267148 | 49.913  | 46.573   |
| Total |           | 15229845 | 573615 | 100.000 | 100.000  |



# ==== Shimadzu LCsolution Analysis Report ====

C:\LabSolutions\Data\DMM\DVR05049 D1\_382017\_955 AM\_9.lcd  
 Acquired by : LC User  
 Sample Name : DVR05049 D1  
 Sample ID : DVR05049 D1  
 Tray# : 1  
 Vial # : 2  
 Injection Volume : 3 uL  
 Data File Name : DVR05049 D1\_382017\_955 AM\_9.lcd  
 Method File Name : col1\_1isoiPA\_30min\_1ML\_254and210.lcm  
 Batch File Name : DMM.lcb  
 Report File Name : Default.lcr  
 Data Acquired : 3/8/2017 1:59:26 PM  
 Data Processed : 3/8/2017 2:29:27 PM

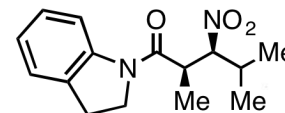

24  
 99% ee

## <Chromatogram>

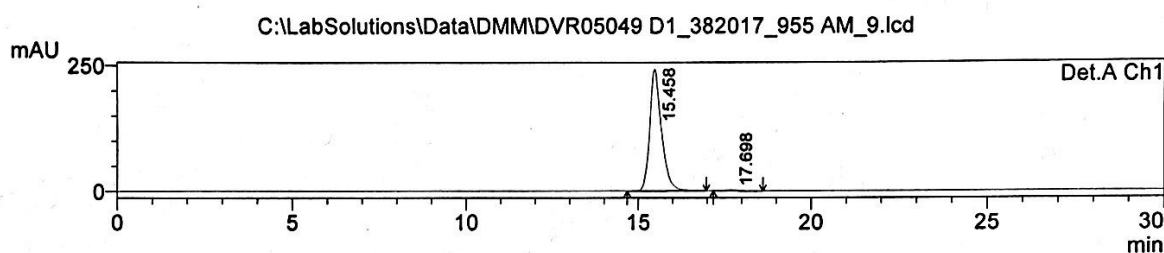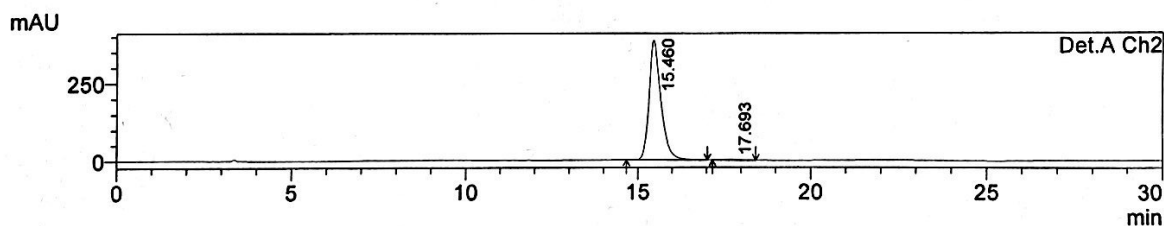

1 Det.A Ch1/254nm  
 2 Det.A Ch2/210nm

PeakTable

Detector A Ch1 254nm

| Peak# | Ret. Time | Area    | Height | Area %  | Height % |
|-------|-----------|---------|--------|---------|----------|
| 1     | 15.458    | 5749436 | 242233 | 99.419  | 99.426   |
| 2     | 17.698    | 33618   | 1397   | 0.581   | 0.574    |
| Total |           | 5783054 | 243630 | 100.000 | 100.000  |

PeakTable

Detector A Ch2 210nm

| Peak# | Ret. Time | Area    | Height | Area %  | Height % |
|-------|-----------|---------|--------|---------|----------|
| 1     | 15.460    | 9262467 | 388183 | 99.470  | 99.457   |
| 2     | 17.693    | 49334   | 2118   | 0.530   | 0.543    |
| Total |           | 9311801 | 390302 | 100.000 | 100.000  |



# ==== Shimadzu LCsolution Analysis Report ====

C:\LabSolutions\Data\DMMDVR05024 RAC COL1\_292017\_1055 AM\_4.lcd  
 Acquired by : LC User  
 Sample Name : DVR05024 RAC COL1  
 Sample ID : DVR05024 RAC COL1  
 Tray# : 1  
 Vail # : 1  
 Injection Volume : 3 uL  
 Data File Name : DVR05024 RAC COL1\_292017\_1055 AM\_4.lcd  
 Method File Name : col1\_5isoiPA\_30min\_1ML\_220and210.lcm  
 Batch File Name : DMM.lcb  
 Report File Name : Default.lcr  
 Data Acquired : 2/9/2017 12:35:22 PM  
 Data Processed : 2/9/2017 1:05:25 PM

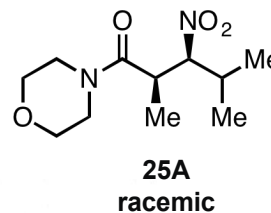

## <Chromatogram>

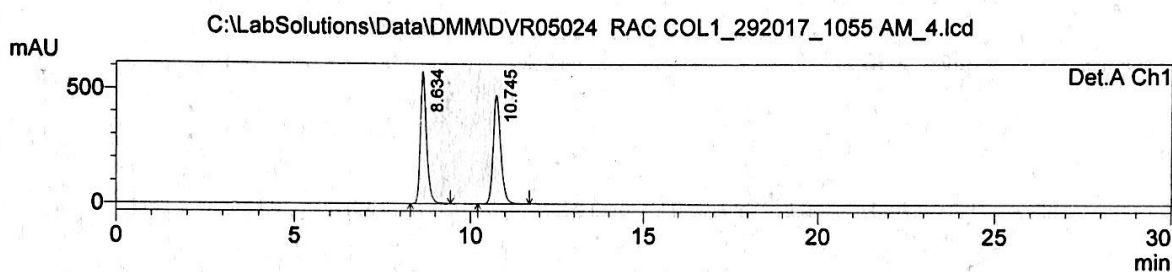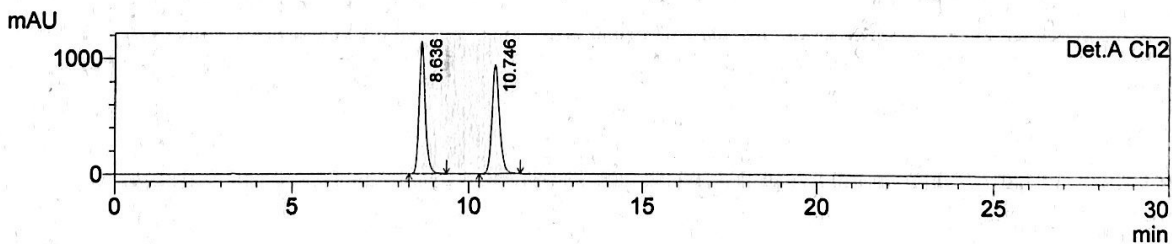

1 Det.A Ch1/220nm  
 2 Det.A Ch2/210nm

PeakTable

Detector A Ch1 220nm

| Peak# | Ret. Time | Area     | Height  | Area %  | Height % |
|-------|-----------|----------|---------|---------|----------|
| 1     | 8.634     | 7177016  | 581006  | 49.806  | 54.856   |
| 2     | 10.745    | 7232806  | 478140  | 50.194  | 45.144   |
| Total |           | 14409822 | 1059146 | 100.000 | 100.000  |

PeakTable

Detector A Ch2 210nm

| Peak# | Ret. Time | Area     | Height  | Area %  | Height % |
|-------|-----------|----------|---------|---------|----------|
| 1     | 8.636     | 14177266 | 1151903 | 49.779  | 54.792   |
| 2     | 10.746    | 14302886 | 950428  | 50.221  | 45.208   |
| Total |           | 28480152 | 2102331 | 100.000 | 100.000  |

# ==== Shimadzu LCsolution Analysis Report ====

C:\LabSolutions\Data\DMMDVR05024 col1\_292017\_1055 AM\_15.lcd  
 Acquired by : LC User  
 Sample Name : DVR05024 col1  
 Sample ID : DVR05024 col1  
 Tray# : 1  
 Vial # : 2  
 Injection Volume : 3 uL  
 Data File Name : DVR05024 col1\_292017\_1055 AM\_15.lcd  
 Method File Name : col1\_5isoiPA\_30min\_1ML\_220and210.lcm  
 Batch File Name : DMM.lcb  
 Report File Name : Default.lcr  
 Data Acquired : 2/10/2017 12:29:01 AM  
 Data Processed : 2/10/2017 12:59:03 AM

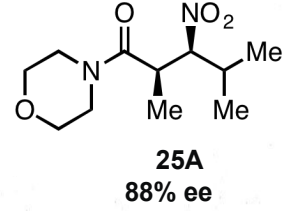

## <Chromatogram>

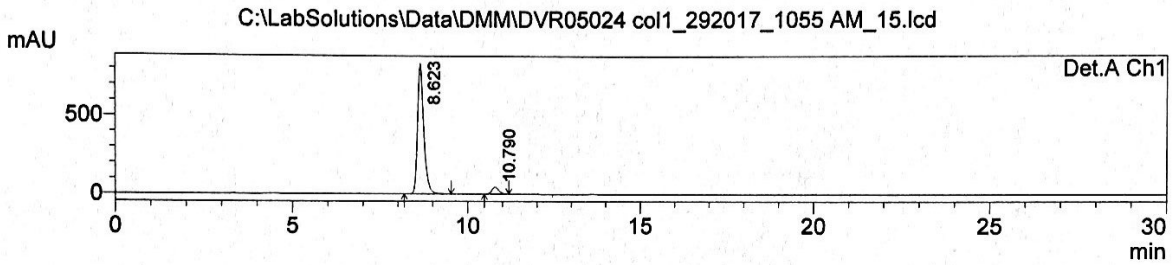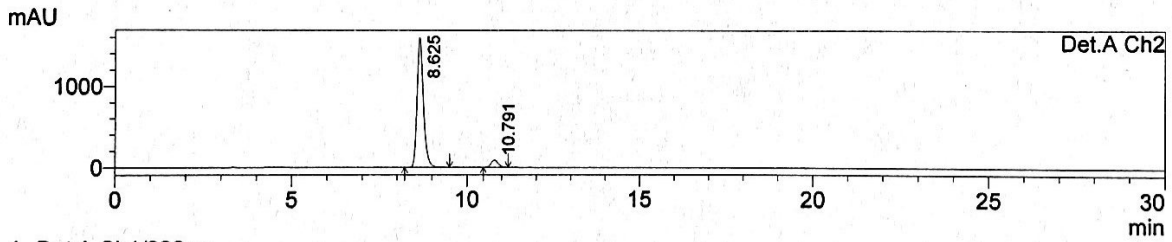

1 Det.A Ch1/220nm  
 2 Det.A Ch2/210nm

PeakTable

Detector A Ch1 220nm

| Peak# | Ret. Time | Area     | Height | Area %  | Height % |
|-------|-----------|----------|--------|---------|----------|
| 1     | 8.623     | 10504819 | 836720 | 94.139  | 94.827   |
| 2     | 10.790    | 653983   | 45642  | 5.861   | 5.173    |
| Total |           | 11158802 | 882362 | 100.000 | 100.000  |

PeakTable

Detector A Ch2 210nm

| Peak# | Ret. Time | Area     | Height  | Area %  | Height % |
|-------|-----------|----------|---------|---------|----------|
| 1     | 8.625     | 20521889 | 1601647 | 94.125  | 94.719   |
| 2     | 10.791    | 1280955  | 89297   | 5.875   | 5.281    |
| Total |           | 21802844 | 1690944 | 100.000 | 100.000  |

# ==== Shimadzu LCsolution Analysis Report ====

C:\LabSolutions\Data\DMM\DVR05053 SYN RAC\_3222017\_1208 PM\_2.lcd  
 Acquired by : LC User  
 Sample Name : DVR05053 SYN RAC  
 Sample ID : DVR05053 SYN RAC  
 Tray# : 1  
 Vial # : 7  
 Injection Volume : 3 uL  
 Data File Name : DVR05053 SYN RAC\_3222017\_1208 PM\_2.lcd  
 Method File Name : col4\_1isoiPA\_30min\_1ML\_210and220.lcm  
 Batch File Name : DMM.lcb  
 Report File Name : Default.lcr  
 Data Acquired : 3/22/2017 12:23:51 PM  
 Data Processed : 3/22/2017 12:53:54 PM

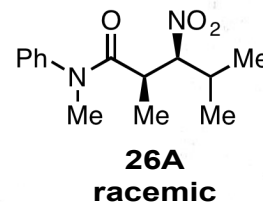

## <Chromatogram>

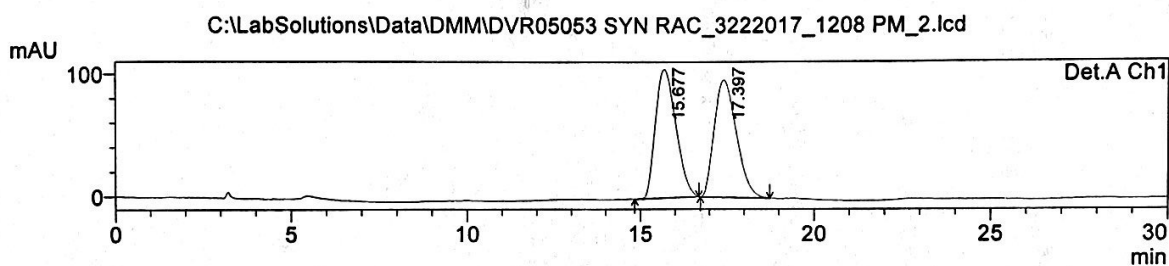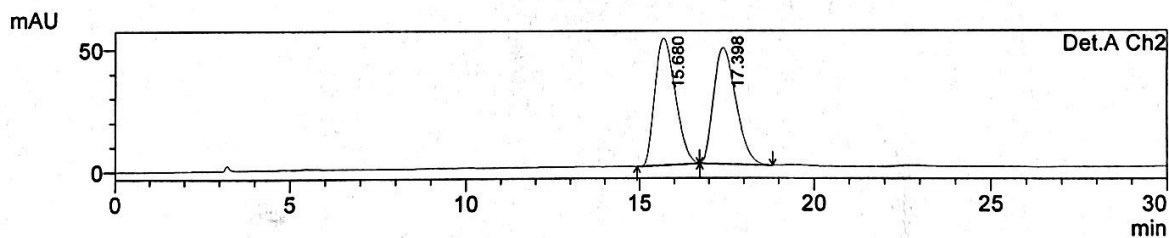

- 1 Det.A Ch1/210nm  
 2 Det.A Ch2/220nm

PeakTable

Detector A Ch1 210nm

| Peak# | Ret. Time | Area    | Height | Area %  | Height % |
|-------|-----------|---------|--------|---------|----------|
| 1     | 15.677    | 4350073 | 105559 | 50.347  | 52.301   |
| 2     | 17.397    | 4290082 | 96271  | 49.653  | 47.699   |
| Total |           | 8640155 | 201830 | 100.000 | 100.000  |

PeakTable

Detector A Ch2 220nm

| Peak# | Ret. Time | Area    | Height | Area %  | Height % |
|-------|-----------|---------|--------|---------|----------|
| 1     | 15.680    | 2144959 | 52093  | 50.222  | 52.168   |
| 2     | 17.398    | 2125976 | 47763  | 49.778  | 47.832   |
| Total |           | 4270935 | 99856  | 100.000 | 100.000  |

## ==== Shimadzu LCsolution Analysis Report ====

Acquired by : LC User  
 Sample Name : DVR05053R1  
 Sample ID : DVR05053R1  
 Tray# : 1  
 Vial # : 6  
 Injection Volume : 3 uL  
 Data File Name : DVR05053R1\_3222017\_1101 AM\_2.lcd  
 Method File Name : col4\_1isoiPA\_30min\_1ML\_210and220.lcm  
 Batch File Name : DMM.lcb  
 Report File Name : Default.lcr  
 Data Acquired : 3/22/2017 11:16:45 AM  
 Data Processed : 3/22/2017 11:46:46 AM

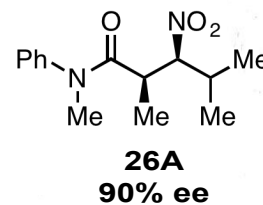

### <Chromatogram>

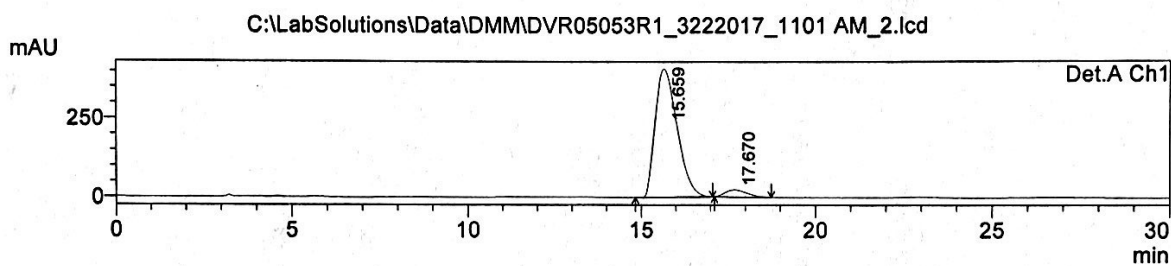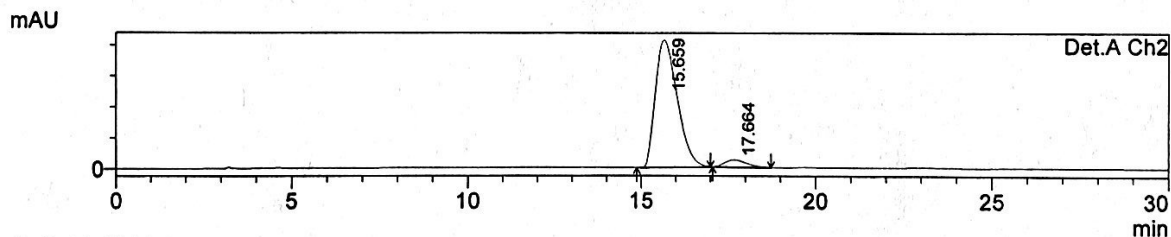

1 Det.A Ch1/210nm  
 2 Det.A Ch2/220nm

PeakTable

Detector A Ch1 210nm

| Peak# | Ret. Time | Area     | Height | Area %  | Height % |
|-------|-----------|----------|--------|---------|----------|
| 1     | 15.659    | 18070828 | 409433 | 94.732  | 94.656   |
| 2     | 17.670    | 1004850  | 23116  | 5.268   | 5.344    |
| Total |           | 19075678 | 432549 | 100.000 | 100.000  |

PeakTable

Detector A Ch2 220nm

| Peak# | Ret. Time | Area    | Height | Area %  | Height % |
|-------|-----------|---------|--------|---------|----------|
| 1     | 15.659    | 9038728 | 206005 | 94.800  | 94.755   |
| 2     | 17.664    | 495833  | 11403  | 5.200   | 5.245    |
| Total |           | 9534561 | 217408 | 100.000 | 100.000  |

# ==== Shimadzu LCsolution Analysis Report ====

C:\LabSolutions\Data\DMM\DVR05051D2 RAC COL1\_3212017\_1941 PM\_5.lcd  
 Acquired by : LC User  
 Sample Name : DVR05051D2 RAC COL1  
 Sample ID : DVR05051D2 RAC COL1  
 Tray# : 1  
 Vail # : 5  
 Injection Volume : 3 uL  
 Data File Name : DVR05051D2 RAC COL1\_3212017\_1941 PM\_5.lcd  
 Method File Name : col1\_5isoiPA\_30min\_1ML\_220and210.lcm  
 Batch File Name : DMM.lcb  
 Report File Name : Default.lcr  
 Data Acquired : 3/21/2017 8:56:16 PM  
 Data Processed : 3/22/2017 11:55:56 AM

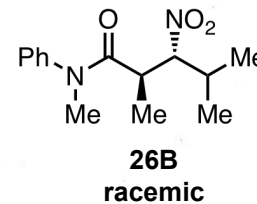

## <Chromatogram>

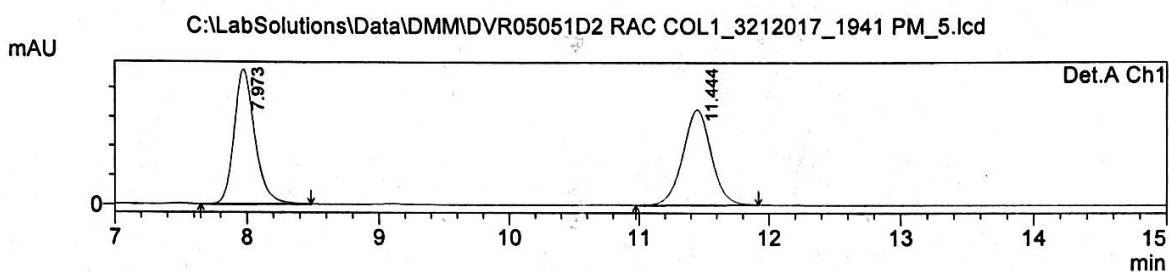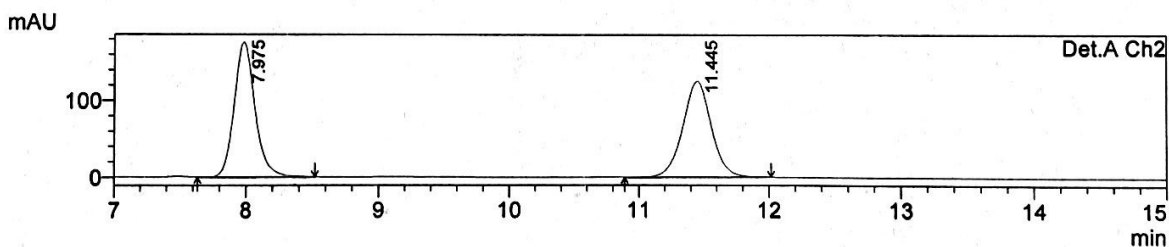

1 Det.A Ch1/220nm  
 2 Det.A Ch2/210nm

PeakTable

Detector A Ch1 220nm

| Peak# | Ret. Time | Area    | Height | Area %  | Height % |
|-------|-----------|---------|--------|---------|----------|
| 1     | 7.973     | 1003185 | 92461  | 50.237  | 58.486   |
| 2     | 11.444    | 993731  | 65631  | 49.763  | 41.514   |
| Total |           | 1996916 | 158092 | 100.000 | 100.000  |

PeakTable

Detector A Ch2 210nm

| Peak# | Ret. Time | Area    | Height | Area %  | Height % |
|-------|-----------|---------|--------|---------|----------|
| 1     | 7.975     | 1917627 | 176028 | 50.094  | 58.360   |
| 2     | 11.445    | 1910441 | 125595 | 49.906  | 41.640   |
| Total |           | 3828068 | 301623 | 100.000 | 100.000  |

## ==== Shimadzu LCsolution Analysis Report ====

Acquired by : LC User  
 Sample Name : DVR05053 ANTI  
 Sample ID : DVR05053 ANTI  
 Tray# : 1  
 Vail # : 2  
 Injection Volume : 3 uL  
 Data File Name : DVR05053 ANTI\_3222017\_1526 PM\_6.lcd  
 Method File Name : col1\_5isoIPA\_30min\_1ML\_220and210.lcm  
 Batch File Name : DMM.lcb  
 Report File Name : Default.lcr  
 Data Acquired : 3/22/2017 4:53:20 PM  
 Data Processed : 3/22/2017 7:24:22 PM

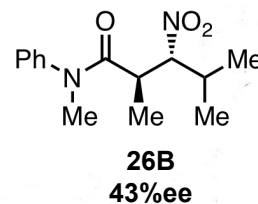

### <Chromatogram>

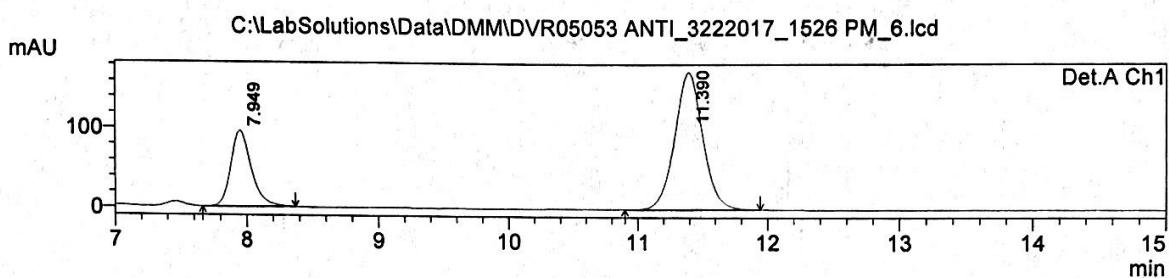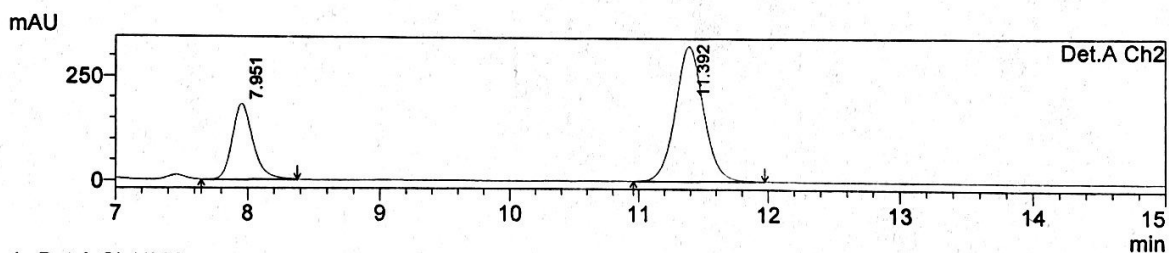

1 Det.A Ch1/220nm  
 2 Det.A Ch2/210nm

PeakTable

Detector A Ch1 220nm

| Peak# | Ret. Time | Area    | Height | Area %  | Height % |
|-------|-----------|---------|--------|---------|----------|
| 1     | 7.949     | 1032740 | 95668  | 28.309  | 35.617   |
| 2     | 11.390    | 2615418 | 172937 | 71.691  | 64.383   |
| Total |           | 3648159 | 268605 | 100.000 | 100.000  |

PeakTable

Detector A Ch2 210nm

| Peak# | Ret. Time | Area    | Height | Area %  | Height % |
|-------|-----------|---------|--------|---------|----------|
| 1     | 7.951     | 1971180 | 182055 | 28.366  | 35.787   |
| 2     | 11.392    | 4977953 | 326658 | 71.634  | 64.213   |
| Total |           | 6949133 | 508713 | 100.000 | 100.000  |



# ==== Shimadzu LCsolution Analysis Report ====

C:\LabSolutions\Data\DMMDVR05096 RAC1\_6222017\_1847 PM\_2.lcd  
 Acquired by : LC User  
 Sample Name : DVR05096 RAC1  
 Sample ID : DVR05096 RAC1  
 Tray# : 1  
 Vial # : 3  
 Injection Volume : 3 uL  
 Data File Name : DVR05096 RAC1\_6222017\_1847 PM\_2.lcd  
 Method File Name : col2\_2isoiPA\_20min\_1ML\_220and210.lcm  
 Batch File Name : DMM.lcb  
 Report File Name : Default.lcr  
 Data Acquired : 6/22/2017 6:58:25 PM  
 Data Processed : 6/22/2017 7:18:27 PM

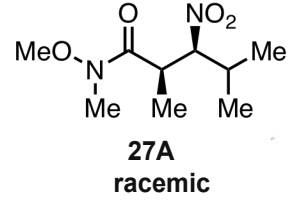

## <Chromatogram>

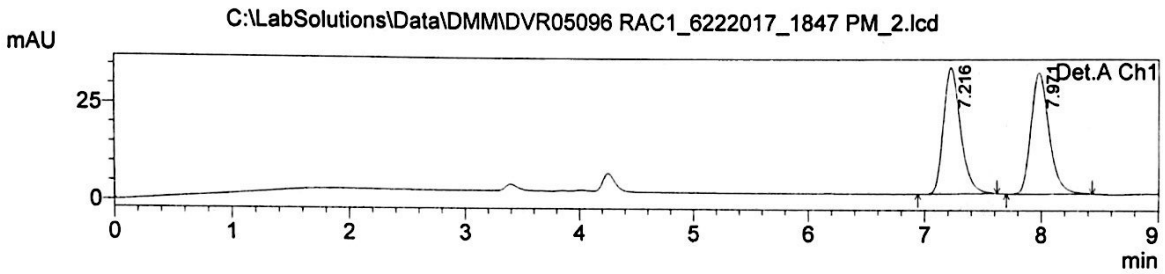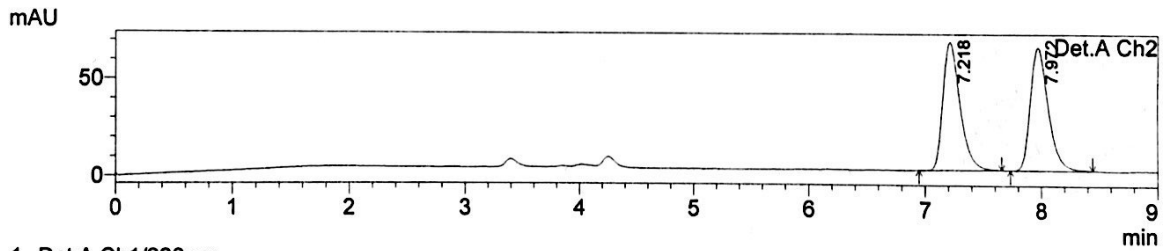

1 Det.A Ch1/220nm  
 2 Det.A Ch2/210nm

PeakTable

Detector A Ch1 220nm

| Peak# | Ret. Time | Area   | Height | Area %  | Height % |
|-------|-----------|--------|--------|---------|----------|
| 1     | 7.216     | 335148 | 32765  | 49.851  | 51.031   |
| 2     | 7.971     | 337158 | 31441  | 50.149  | 48.969   |
| Total |           | 672306 | 64206  | 100.000 | 100.000  |

PeakTable

Detector A Ch2 210nm

| Peak# | Ret. Time | Area    | Height | Area %  | Height % |
|-------|-----------|---------|--------|---------|----------|
| 1     | 7.218     | 676907  | 66033  | 49.917  | 51.038   |
| 2     | 7.972     | 679157  | 63346  | 50.083  | 48.962   |
| Total |           | 1356064 | 129379 | 100.000 | 100.000  |

# ==== Shimadzu LCsolution Analysis Report ====

C:\LabSolutions\Data\DMMDVR05096 D1\_6222017\_1847 PM\_3.lcd  
 Acquired by : LC User  
 Sample Name : DVR05096 D1  
 Sample ID : DVR05096 D1  
 Tray# : 1  
 Vail # : 4  
 Injection Volume : 3 uL  
 Data File Name : DVR05096 D1\_6222017\_1847 PM\_3.lcd  
 Method File Name : col2\_2isoiPA\_20min\_1ML\_220and210.lcm  
 Batch File Name : DMM.lcb  
 Report File Name : Default.lcr  
 Data Acquired : 6/22/2017 7:19:00 PM  
 Data Processed : 6/22/2017 7:39:02 PM

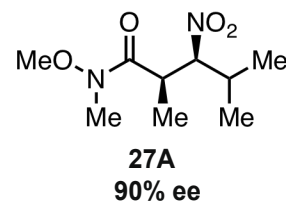

## <Chromatogram>

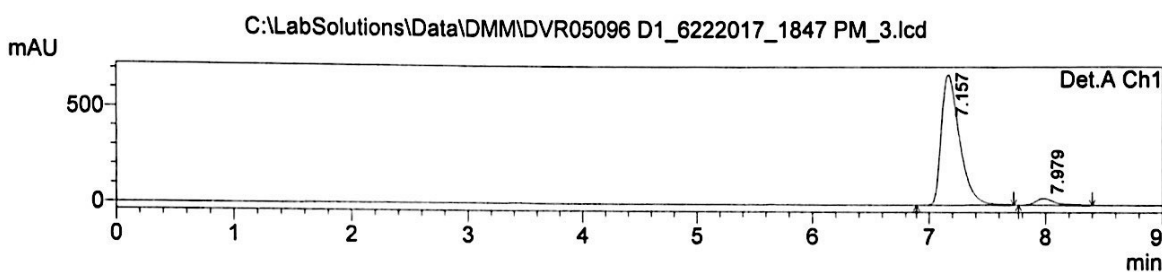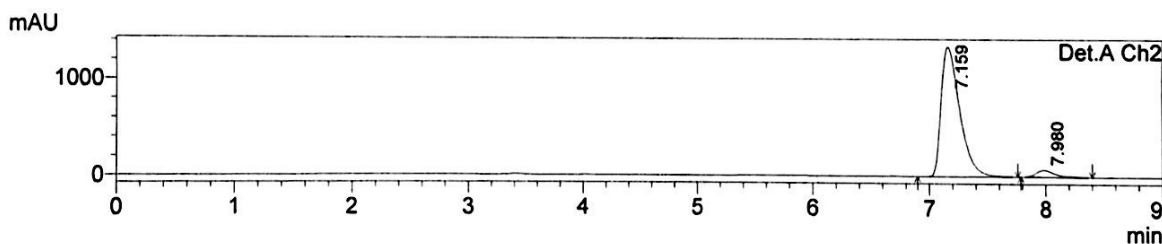

1 Det.A Ch1/220nm  
 2 Det.A Ch2/210nm

PeakTable

Detector A Ch1 220nm

| Peak# | Ret. Time | Area    | Height | Area %  | Height % |
|-------|-----------|---------|--------|---------|----------|
| 1     | 7.157     | 7448257 | 684968 | 94.858  | 95.094   |
| 2     | 7.979     | 403717  | 35340  | 5.142   | 4.906    |
| Total |           | 7851974 | 720308 | 100.000 | 100.000  |

PeakTable

Detector A Ch2 210nm

| Peak# | Ret. Time | Area     | Height  | Area %  | Height % |
|-------|-----------|----------|---------|---------|----------|
| 1     | 7.159     | 14946443 | 1348215 | 94.973  | 94.971   |
| 2     | 7.980     | 791193   | 71392   | 5.027   | 5.029    |
| Total |           | 15737636 | 1419607 | 100.000 | 100.000  |



# ==== Shimadzu LCsolution Analysis Report ====

Acquired by : LC User  
 Sample Name : DVR05096 RAC1  
 Sample ID : DVR05096 RAC1  
 Tray# : 1  
 Vial # : 3  
 Injection Volume : 3 uL  
 Data File Name : DVR05096 RAC1\_6222017\_1847 PM\_2.lcd  
 Method File Name : col2\_2isoiPA\_20min\_1ML\_220and210.lcm  
 Batch File Name : DMM.lcb  
 Report File Name : Default.lcr  
 Data Acquired : 6/22/2017 6:58:25 PM  
 Data Processed : 6/22/2017 8:30:04 PM

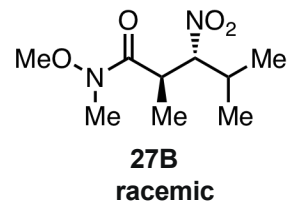

## <Chromatogram>

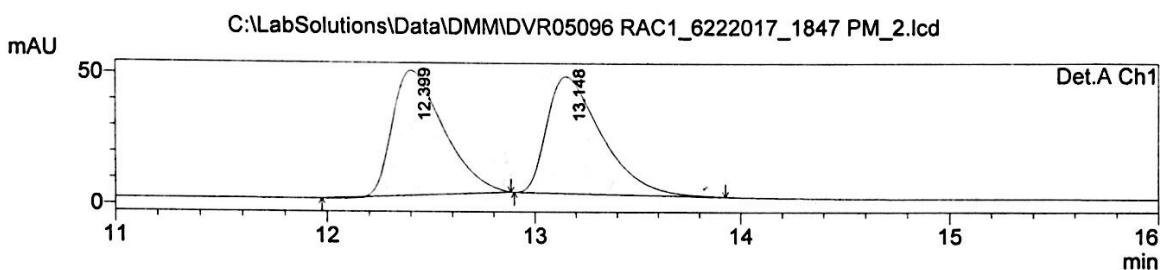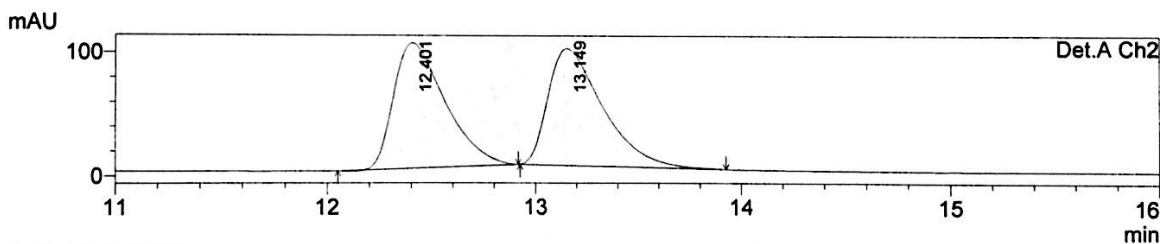

1 Det.A Ch1/220nm  
 2 Det.A Ch2/210nm

PeakTable

Detector A Ch1 220nm

| Peak# | Ret. Time | Area    | Height | Area %  | Height % |
|-------|-----------|---------|--------|---------|----------|
| 1     | 12.399    | 815274  | 47869  | 49.467  | 51.573   |
| 2     | 13.148    | 832837  | 44949  | 50.533  | 48.427   |
| Total |           | 1648111 | 92818  | 100.000 | 100.000  |

PeakTable

Detector A Ch2 210nm

| Peak# | Ret. Time | Area    | Height | Area %  | Height % |
|-------|-----------|---------|--------|---------|----------|
| 1     | 12.401    | 1753453 | 102119 | 49.856  | 51.741   |
| 2     | 13.149    | 1763598 | 95247  | 50.144  | 48.259   |
| Total |           | 3517051 | 197366 | 100.000 | 100.000  |

# ==== Shimadzu LCsolution Analysis Report ====

Acquired by : C:\LabSolutions\Data\DMM\DVR05096 D1\_6222017\_1847 PM\_3.lcd  
 : LC User  
 Sample Name : DVR05096 D1  
 Sample ID : DVR05096 D1  
 Tray# : 1  
 Vail # : 4  
 Injection Volume : 3 uL  
 Data File Name : DVR05096 D1\_6222017\_1847 PM\_3.lcd  
 Method File Name : col2\_2isoiPA\_20min\_1ML\_220and210.lcm  
 Batch File Name : DMM.lcb  
 Report File Name : Default.lcr  
 Data Acquired : 6/22/2017 7:19:00 PM  
 Data Processed : 6/22/2017 8:33:52 PM

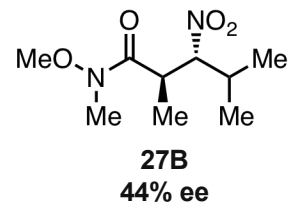

## <Chromatogram>

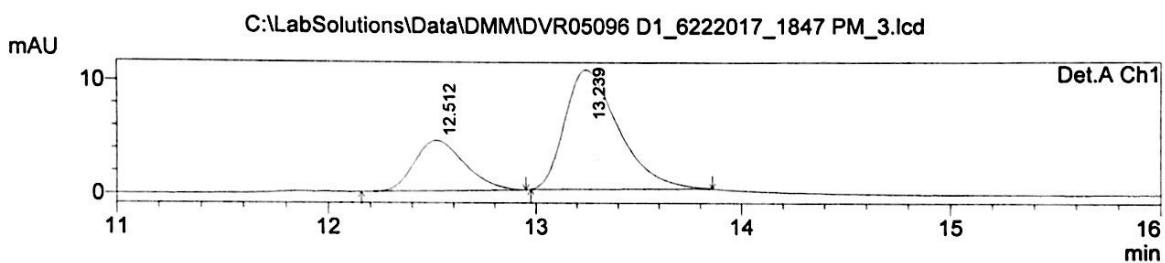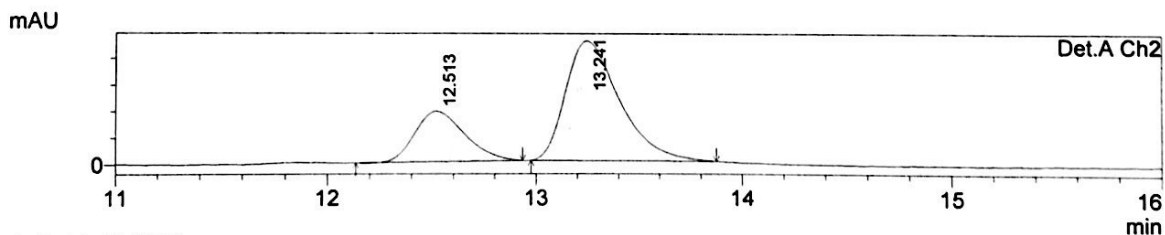

- 1 Det.A Ch1/220nm
- 2 Det.A Ch2/210nm

PeakTable

Detector A Ch1 220nm

| Peak# | Ret. Time | Area   | Height | Area %  | Height % |
|-------|-----------|--------|--------|---------|----------|
| 1     | 12.512    | 75349  | 4503   | 28.007  | 29.709   |
| 2     | 13.239    | 193688 | 10655  | 71.993  | 70.291   |
| Total |           | 269037 | 15158  | 100.000 | 100.000  |

PeakTable

Detector A Ch2 210nm

| Peak# | Ret. Time | Area   | Height | Area %  | Height % |
|-------|-----------|--------|--------|---------|----------|
| 1     | 12.513    | 158531 | 9527   | 27.733  | 29.604   |
| 2     | 13.241    | 413097 | 22654  | 72.267  | 70.396   |
| Total |           | 571628 | 32180  | 100.000 | 100.000  |

# ==== Shimadzu LCsolution Analysis Report ====

C:\LabSolutions\Data\DMM\DVR05057 RAC D1\_3232017\_1059 AM\_2.lcd  
 Acquired by : LC User  
 Sample Name : DVR05057 RAC D1  
 Sample ID : DVR05057 RAC D1  
 Tray# : 1  
 Vail # : 1  
 Injection Volume : 3 uL  
 Data File Name : DVR05057 RAC D1\_3232017\_1059 AM\_2.lcd  
 Method File Name : col1\_1isoiPA\_30min\_1ML\_254and210.lcm  
 Batch File Name : DMM.lcb  
 Report File Name : Default.lcr  
 Data Acquired : 3/23/2017 11:15:40 AM  
 Data Processed : 3/23/2017 11:45:42 AM

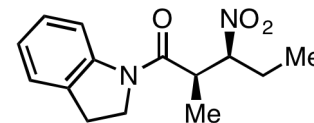

**28A**  
racemic

## <Chromatogram>

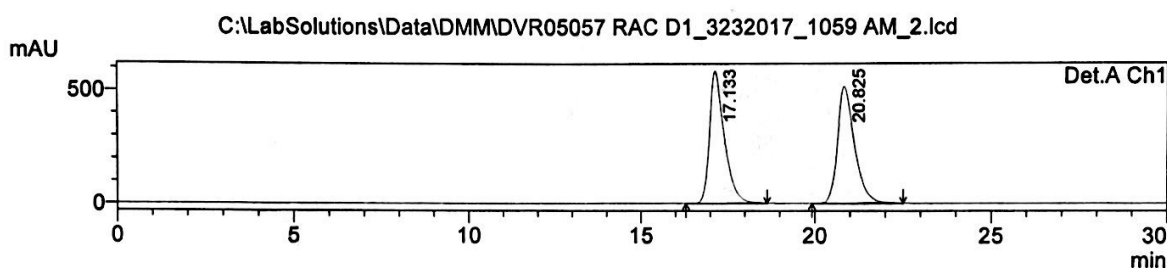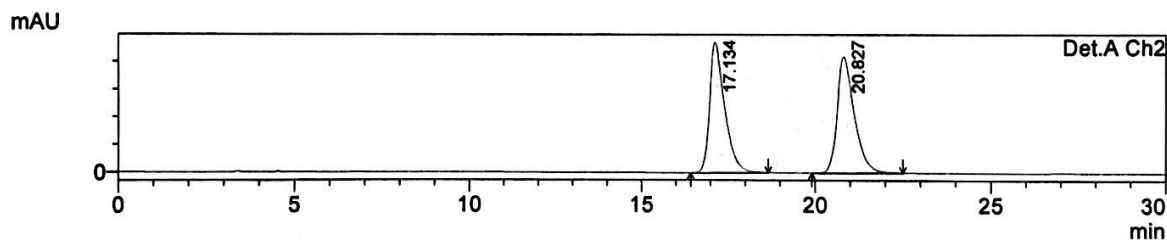

- 1 Det.A Ch1/254nm  
 2 Det.A Ch2/210nm

PeakTable

Detector A Ch1 254nm

| Peak# | Ret. Time | Area     | Height  | Area %  | Height % |
|-------|-----------|----------|---------|---------|----------|
| 1     | 17.133    | 17410414 | 585976  | 50.036  | 53.102   |
| 2     | 20.825    | 17385493 | 517516  | 49.964  | 46.898   |
| Total |           | 34795906 | 1103492 | 100.000 | 100.000  |

PeakTable

Detector A Ch2 210nm

| Peak# | Ret. Time | Area     | Height  | Area %  | Height % |
|-------|-----------|----------|---------|---------|----------|
| 1     | 17.134    | 28484540 | 949339  | 49.925  | 52.982   |
| 2     | 20.827    | 28569783 | 842484  | 50.075  | 47.018   |
| Total |           | 57054323 | 1791823 | 100.000 | 100.000  |

## ==== Shimadzu LCsolution Analysis Report ====

C:\LabSolutions\Data\DMM\DVR05054F1\_3212017\_1941 PM\_1.lcd  
 Acquired by : LC User  
 Sample Name : DVR05054F1  
 Sample ID : DVR05054F1  
 Tray# : 1  
 Vial # : 4  
 Injection Volume : 2 uL  
 Data File Name : DVR05054F1\_3212017\_1941 PM\_1.lcd  
 Method File Name : col1\_1isoiPA\_30min\_1ML\_254and210.lcm  
 Batch File Name : DMM.lcb  
 Report File Name : Default.lcr  
 Data Acquired : 3/21/2017 8:05:18 PM  
 Data Processed : 3/22/2017 9:02:54 AM

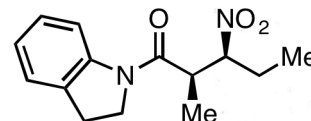

**28A**  
85% ee

### <Chromatogram>

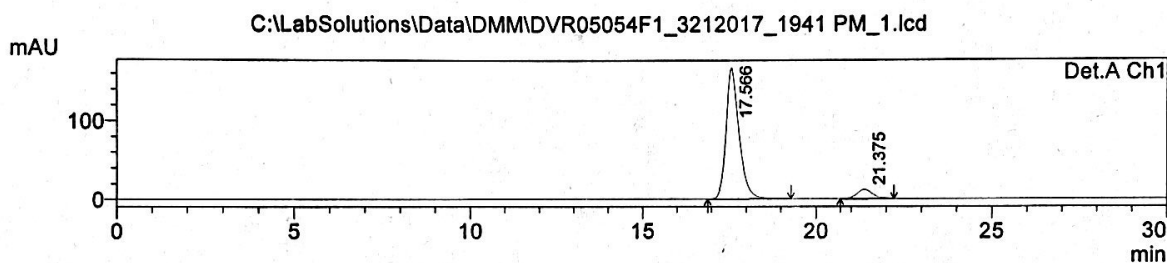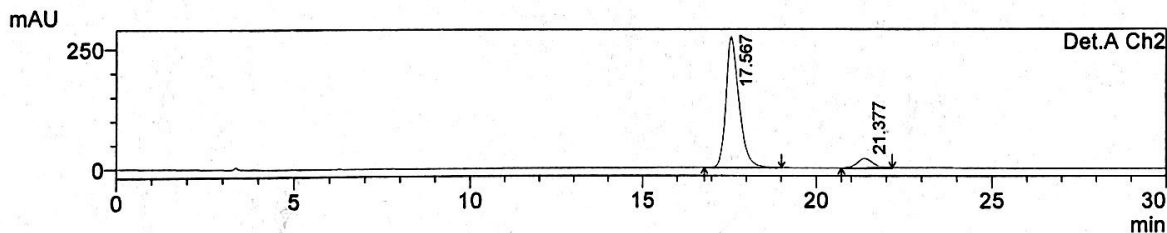

1 Det.A Ch1/254nm  
2 Det.A Ch2/210nm

PeakTable

Detector A Ch1 254nm

| Peak# | Ret. Time | Area    | Height | Area %  | Height % |
|-------|-----------|---------|--------|---------|----------|
| 1     | 17.566    | 4379186 | 167345 | 92.314  | 93.285   |
| 2     | 21.375    | 364615  | 12046  | 7.686   | 6.715    |
| Total |           | 4743801 | 179391 | 100.000 | 100.000  |

PeakTable

Detector A Ch2 210nm

| Peak# | Ret. Time | Area    | Height | Area %  | Height % |
|-------|-----------|---------|--------|---------|----------|
| 1     | 17.567    | 7242536 | 276749 | 92.329  | 93.267   |
| 2     | 21.377    | 601759  | 19978  | 7.671   | 6.733    |
| Total |           | 7844295 | 296727 | 100.000 | 100.000  |

## ==== Shimadzu LCsolution Analysis Report ====

Acquired by : LC User  
 Sample Name : DVR05057 RAC D2  
 Sample ID : DVR05056 RAC D2  
 Tray# : 1  
 Vial # : 3  
 Injection Volume : 3 uL  
 Data File Name : DVR05056 RAC D2\_3232017\_1323 PM\_4.lcd  
 Method File Name : col1\_5isoiPA\_60min\_1ML\_220and210.lcm  
 Batch File Name : DMM.lcb  
 Report File Name : Default.lcr  
 Data Acquired : 3/23/2017 9:39:19 PM  
 Data Processed : 3/23/2017 10:39:19 PM

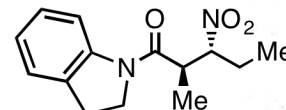

### <Chromatogram>

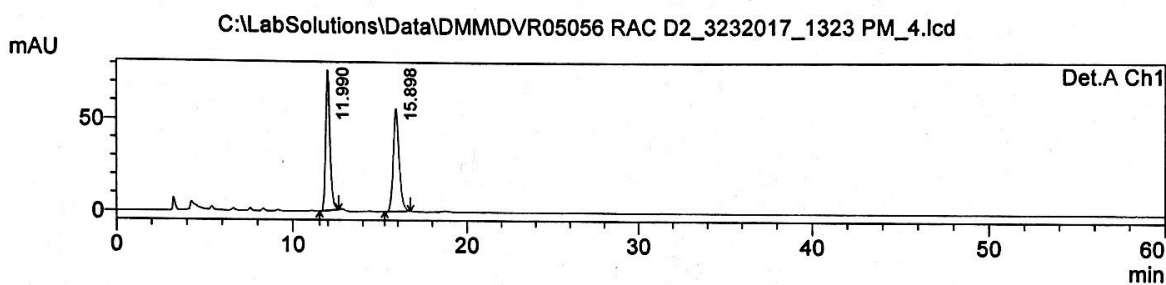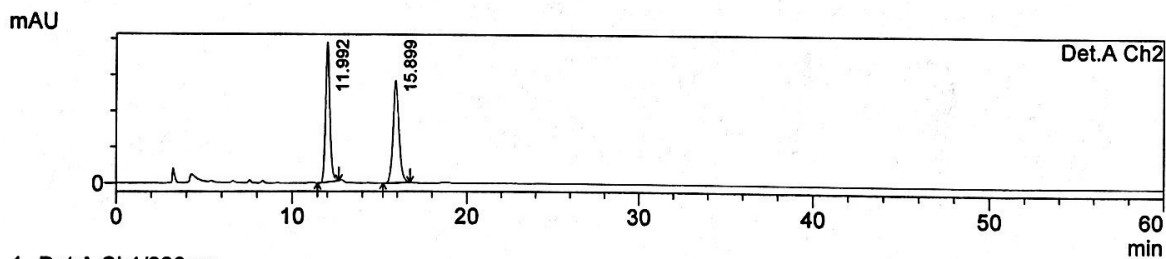

1 Det.A Ch1/220nm  
 2 Det.A Ch2/210nm

PeakTable

Detector A Ch1 220nm

| Peak# | Ret. Time | Area    | Height | Area %  | Height % |
|-------|-----------|---------|--------|---------|----------|
| 1     | 11.990    | 1302409 | 76793  | 49.604  | 57.681   |
| 2     | 15.898    | 1323191 | 56341  | 50.396  | 42.319   |
| Total |           | 2625600 | 133134 | 100.000 | 100.000  |

PeakTable

Detector A Ch2 210nm

| Peak# | Ret. Time | Area    | Height | Area %  | Height % |
|-------|-----------|---------|--------|---------|----------|
| 1     | 11.992    | 3277661 | 194717 | 49.618  | 57.758   |
| 2     | 15.899    | 3328124 | 142408 | 50.382  | 42.242   |
| Total |           | 6605785 | 337125 | 100.000 | 100.000  |

# ==== Shimadzu LCsolution Analysis Report =====

C:\LabSolutions\Data\DMM\DVR05056 D2\_3232017\_1323 PM\_8.lcd  
 Acquired by : LC User  
 Sample Name : DVR05057 D2  
 Sample ID : DVR05056 D2  
 Tray# : 1  
 Vial # : 4  
 Injection Volume : 3 uL  
 Data File Name : DVR05056 D2\_3232017\_1323 PM\_8.lcd  
 Method File Name : col1\_5isoiPA\_60min\_1ML\_220and210.lcm  
 Batch File Name : DMM.lcb  
 Report File Name : Default.lcr  
 Data Acquired : 3/23/2017 11:20:12 PM  
 Data Processed : 3/24/2017 12:20:15 AM

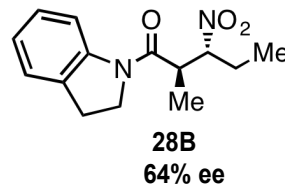

## <Chromatogram>

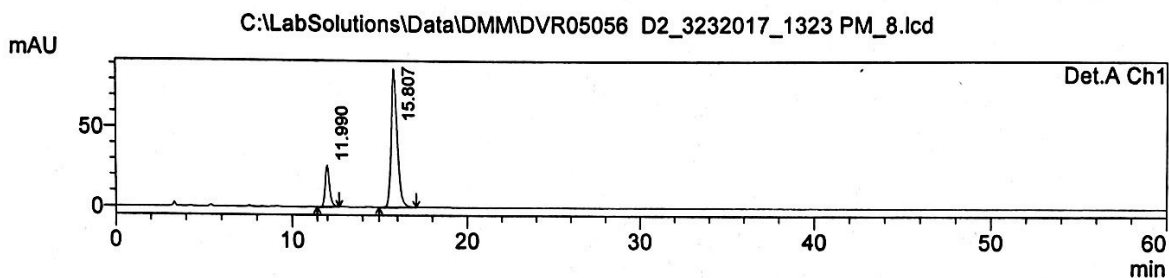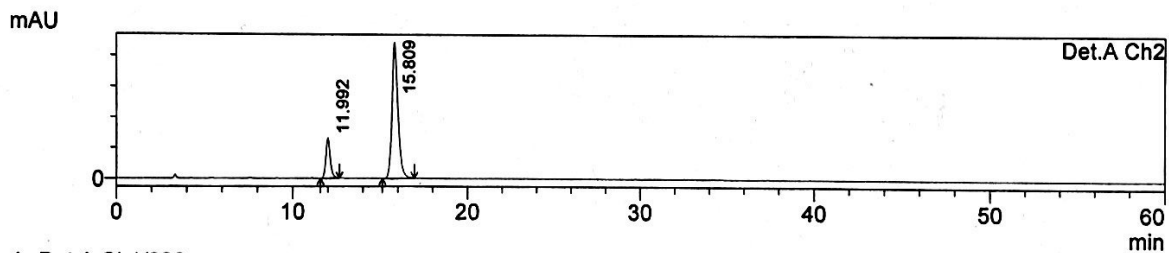

1 Det.A Ch1/220nm  
 2 Det.A Ch2/210nm

PeakTable

Detector A Ch1 220nm

| Peak# | Ret. Time | Area    | Height | Area %  | Height % |
|-------|-----------|---------|--------|---------|----------|
| 1     | 11.990    | 448172  | 26222  | 17.777  | 23.091   |
| 2     | 15.807    | 2072970 | 87337  | 82.223  | 76.909   |
| Total |           | 2521141 | 113559 | 100.000 | 100.000  |

PeakTable

Detector A Ch2 210nm

| Peak# | Ret. Time | Area    | Height | Area %  | Height % |
|-------|-----------|---------|--------|---------|----------|
| 1     | 11.992    | 1122696 | 65808  | 17.661  | 22.853   |
| 2     | 15.809    | 5234057 | 222154 | 82.339  | 77.147   |
| Total |           | 6356753 | 287962 | 100.000 | 100.000  |

# ==== Shimadzu LCsolution Analysis Report ====

C:\LabSolutions\Data\DMM\DVR05062B SYN RAC\_4132017\_1444 PM\_1.lcd  
 Acquired by : LC User  
 Sample Name : DVR05062B SYN RAC  
 Sample ID : DVR05062B SYN RAC  
 Tray# : 1  
 Vial # : 1  
 Injection Volume : 3 uL  
 Data File Name : DVR05062B SYN RAC\_4132017\_1444 PM\_1.lcd  
 Method File Name : col1\_5isoiPA\_30min\_1ML\_220and210.lcm  
 Batch File Name : DMM.lcb  
 Report File Name : Default.lcr  
 Data Acquired : 4/13/2017 4:27:31 PM  
 Data Processed : 4/26/2017 8:07:54 PM

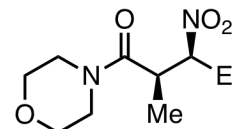

**29A**  
racemic

## <Chromatogram>

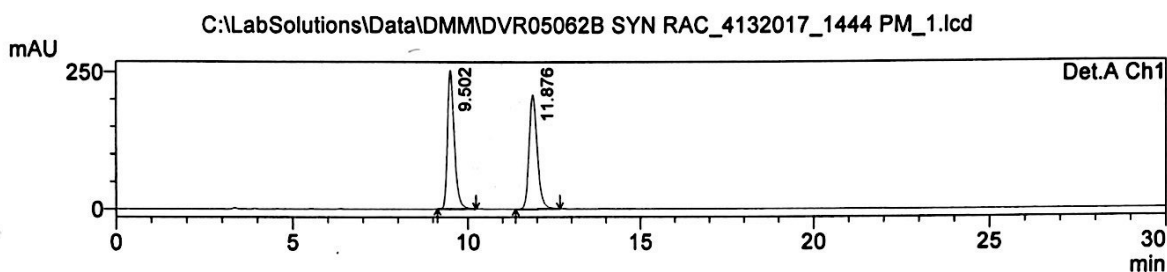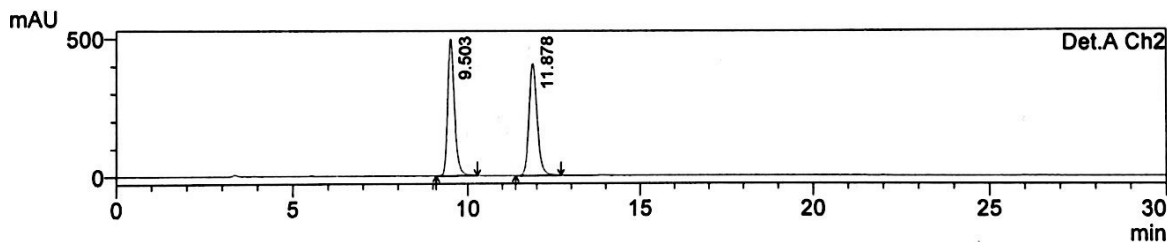

1 Det.A Ch1/220nm  
 2 Det.A Ch2/210nm

PeakTable

Detector A Ch1 220nm

| Peak# | Ret. Time | Area    | Height | Area %  | Height % |
|-------|-----------|---------|--------|---------|----------|
| 1     | 9.502     | 3400093 | 254233 | 49.892  | 54.860   |
| 2     | 11.876    | 3414842 | 209185 | 50.108  | 45.140   |
| Total |           | 6814935 | 463417 | 100.000 | 100.000  |

PeakTable

Detector A Ch2 210nm

| Peak# | Ret. Time | Area     | Height | Area %  | Height % |
|-------|-----------|----------|--------|---------|----------|
| 1     | 9.503     | 6685168  | 499845 | 50.023  | 54.929   |
| 2     | 11.878    | 6678977  | 410134 | 49.977  | 45.071   |
| Total |           | 13364145 | 909979 | 100.000 | 100.000  |



## ==== Shimadzu LCsolution Analysis Report ====

Acquired by : LC User  
 Sample Name : DVR05064SYN  
 Sample ID : DVR05064SYN  
 Tray# : 1  
 Vial # : 1  
 Injection Volume : 3 uL  
 Data File Name : DVR05064SYN\_4272017\_1056 AM\_2.lcd  
 Method File Name : col1\_5isoiPA\_35min\_1ML\_220and210.lcm  
 Batch File Name : DMM.lcb  
 Report File Name : Default.lcr  
 Data Acquired : 4/27/2017 11:12:37 AM  
 Data Processed : 4/27/2017 4:51:01 PM

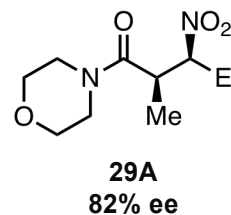

### <Chromatogram>

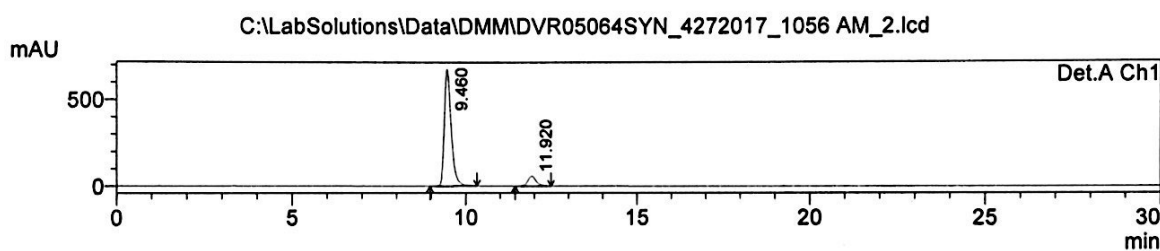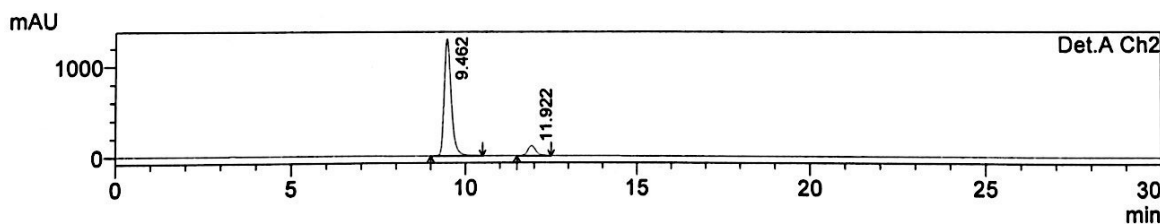

1 Det.A Ch1/220nm  
 2 Det.A Ch2/210nm

PeakTable

Detector A Ch1 220nm

| Peak# | Ret. Time | Area     | Height | Area %  | Height % |
|-------|-----------|----------|--------|---------|----------|
| 1     | 9.460     | 9282986  | 679090 | 90.839  | 92.145   |
| 2     | 11.920    | 936213   | 57888  | 9.161   | 7.855    |
| Total |           | 10219199 | 736978 | 100.000 | 100.000  |

PeakTable

Detector A Ch2 210nm

| Peak# | Ret. Time | Area     | Height  | Area %  | Height % |
|-------|-----------|----------|---------|---------|----------|
| 1     | 9.462     | 18152526 | 1311597 | 90.899  | 92.084   |
| 2     | 11.922    | 1817481  | 112747  | 9.101   | 7.916    |
| Total |           | 19970007 | 1424344 | 100.000 | 100.000  |



# ==== Shimadzu LCsolution Analysis Report ====

C:\LabSolutions\Data\DMM\DVR05064ANTI RAC 2\_892017\_1946 PM\_2.lcd  
 Acquired by : LC User  
 Sample Name : DVR05064ANTI RAC 2  
 Sample ID : DVR05064ANTI RAC 2  
 Tray# : 1  
 Vial # : 1  
 Injection Volume : 5 uL  
 Data File Name : DVR05064ANTI RAC 2\_892017\_1946 PM\_2.lcd  
 Method File Name : col1\_5isoiPA\_30min\_1ML\_220and210.lcm  
 Batch File Name : DMM.lcb  
 Report File Name : Default.lcr  
 Data Acquired : 8/9/2017 7:57:11 PM  
 Data Processed : 8/11/2017 11:21:57 AM

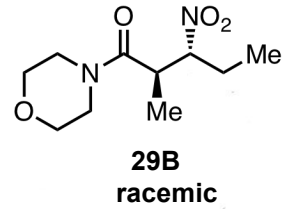

## <Chromatogram>

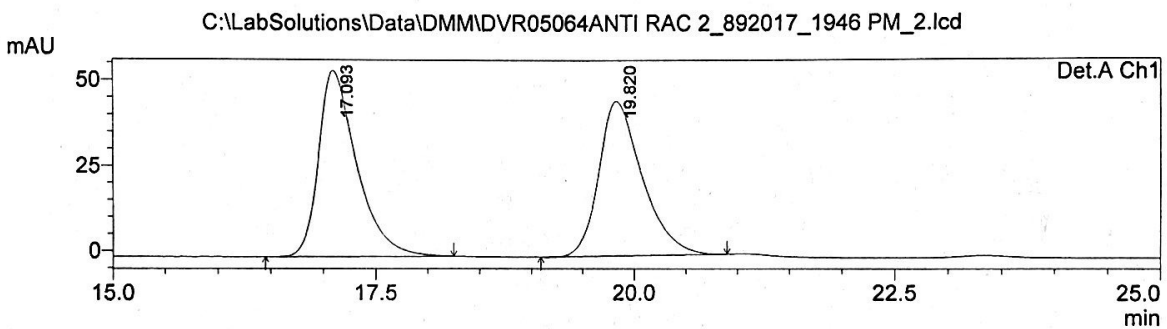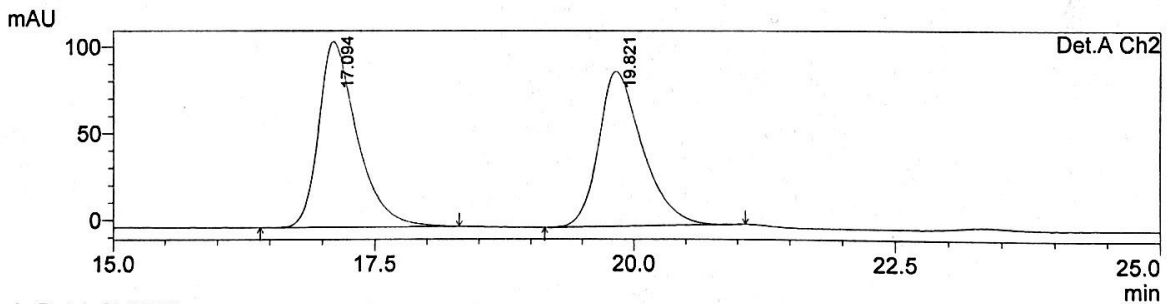

1 Det.A Ch1/220nm  
 2 Det.A Ch2/210nm

PeakTable

Detector A Ch1 220nm

| Peak# | Ret. Time | Area    | Height | Area %  | Height % |
|-------|-----------|---------|--------|---------|----------|
| 1     | 17.093    | 1386247 | 54558  | 50.838  | 54.487   |
| 2     | 19.820    | 1340558 | 45572  | 49.162  | 45.513   |
| Total |           | 2726805 | 100130 | 100.000 | 100.000  |

PeakTable

Detector A Ch2 210nm

| Peak# | Ret. Time | Area    | Height | Area %  | Height % |
|-------|-----------|---------|--------|---------|----------|
| 1     | 17.094    | 2723976 | 107119 | 50.856  | 54.491   |
| 2     | 19.821    | 2632268 | 89461  | 49.144  | 45.509   |
| Total |           | 5356244 | 196580 | 100.000 | 100.000  |

# ==== Shimadzu LCsolution Analysis Report ====

C:\LabSolutions\Data\DMM\DVR05064 D2-A\_8152017\_1731 PM\_2.lcd  
 Acquired by : LC User  
 Sample Name : DVR05064 D2-A  
 Sample ID : DVR05064 D2-A  
 Tray# : 1  
 Vial # : 5  
 Injection Volume : 5 uL  
 Data File Name : DVR05064 D2-A\_8152017\_1731 PM\_2.lcd  
 Method File Name : col1\_5isoiPA\_30min\_1ML\_220and210.lcm  
 Batch File Name : DMM.lcb  
 Report File Name : Default.lcr  
 Data Acquired : 8/15/2017 5:42:34 PM  
 Data Processed : 8/15/2017 6:12:36 PM

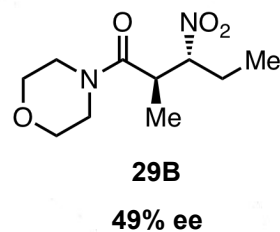

## <Chromatogram>

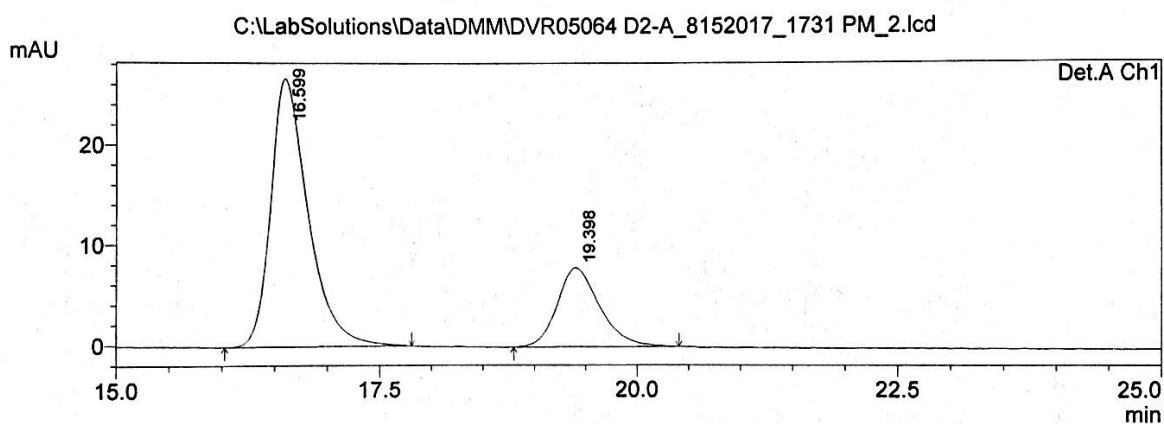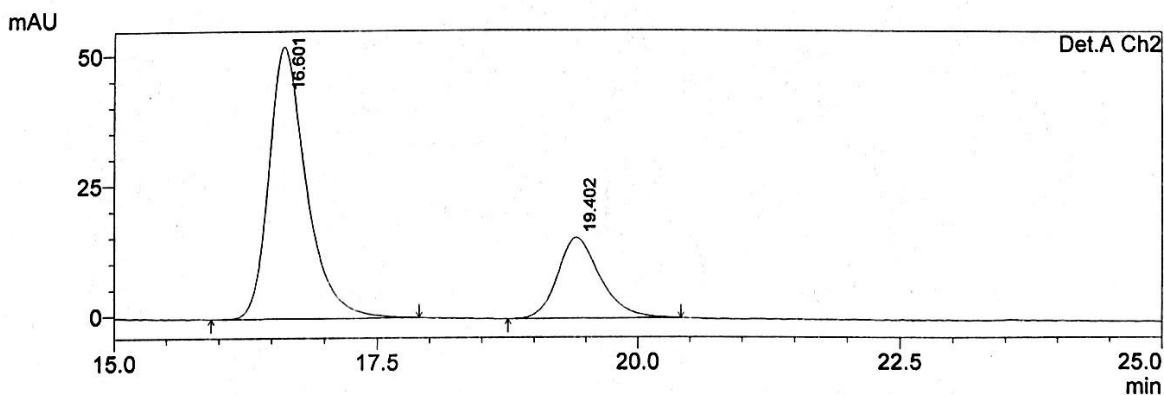

- 1 Det.A Ch1/220nm
- 2 Det.A Ch2/210nm

PeakTable

Detector A Ch1 220nm

| Peak# | Ret. Time | Area   | Height | Area %  | Height % |
|-------|-----------|--------|--------|---------|----------|
| 1     | 16.599    | 661030 | 26807  | 74.380  | 77.191   |
| 2     | 19.398    | 227688 | 7921   | 25.620  | 22.809   |
| Total |           | 888718 | 34728  | 100.000 | 100.000  |

PeakTable

Detector A Ch2 210nm

| Peak# | Ret. Time | Area    | Height | Area %  | Height % |
|-------|-----------|---------|--------|---------|----------|
| 1     | 16.601    | 1288922 | 52217  | 74.407  | 77.144   |
| 2     | 19.402    | 443330  | 15471  | 25.593  | 22.856   |
| Total |           | 1732252 | 67688  | 100.000 | 100.000  |

# ==== Shimadzu LCsolution Analysis Report ====

C:\LabSolutions\Data\DMMDVR05063 SYN RAC\_4142017\_1035 AM\_4.lcd  
 Acquired by : LC User  
 Sample Name : DVR05063 SYN RAC  
 Sample ID : DVR05063 SYN RAC  
 Tray# : 1  
 Vail # : 1  
 Injection Volume : 3 uL  
 Data File Name : DVR05063 SYN RAC\_4142017\_1035 AM\_4.lcd  
 Method File Name : col2\_1isoiPA\_45min\_1ML\_220 and210.lcm  
 Batch File Name : DMM.lcb  
 Report File Name : Default.lcr  
 Data Acquired : 4/14/2017 12:21:24 PM  
 Data Processed : 4/14/2017 9:27:36 PM

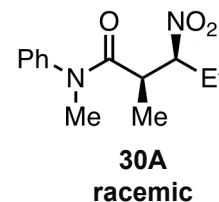

## <Chromatogram>

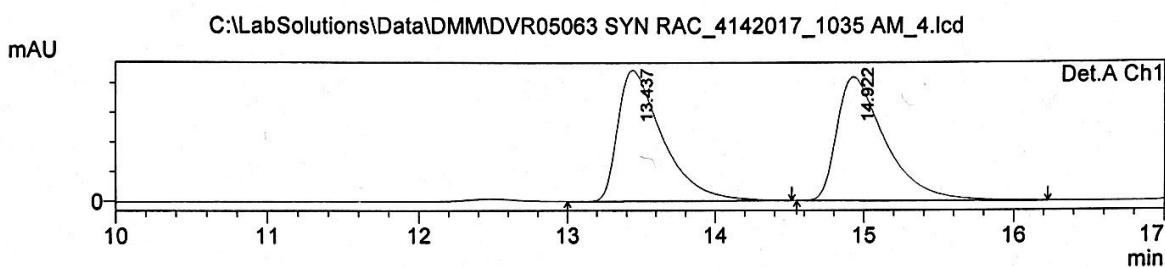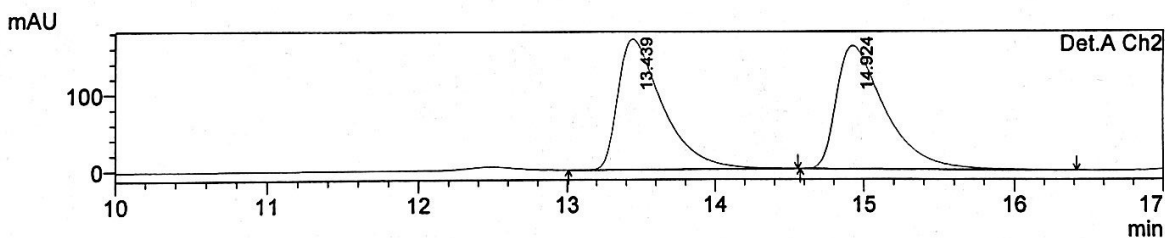

1 Det.A Ch1/220nm  
 2 Det.A Ch2/210nm

PeakTable

Detector A Ch1 220nm

| Peak# | Ret. Time | Area    | Height | Area %  | Height % |
|-------|-----------|---------|--------|---------|----------|
| 1     | 13.437    | 1875039 | 89147  | 49.907  | 51.483   |
| 2     | 14.922    | 1882004 | 84011  | 50.093  | 48.517   |
| Total |           | 3757042 | 173158 | 100.000 | 100.000  |

PeakTable

Detector A Ch2 210nm

| Peak# | Ret. Time | Area    | Height | Area %  | Height % |
|-------|-----------|---------|--------|---------|----------|
| 1     | 13.439    | 3640912 | 172661 | 49.757  | 51.429   |
| 2     | 14.924    | 3676496 | 163067 | 50.243  | 48.571   |
| Total |           | 7317407 | 335728 | 100.000 | 100.000  |

# ==== Shimadzu LCsolution Analysis Report ====

C:\LabSolutions\Data\DMM\DVR05063 SYN\_4142017\_1035 AM\_5.lcd  
 Acquired by : LC User  
 Sample Name : DVR05063 SYN  
 Sample ID : DVR05063 SYN  
 Tray# : 1  
 Vial # : 2  
 Injection Volume : 3 uL  
 Data File Name : DVR05063 SYN\_4142017\_1035 AM\_5.lcd  
 Method File Name : col2\_1isoiPA\_45min\_1ML\_220 and210.lcm  
 Batch File Name : DMM.lcb  
 Report File Name : Default.lcr  
 Data Acquired : 4/14/2017 1:47:22 PM  
 Data Processed : 4/14/2017 9:21:59 PM

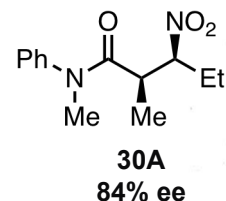

## <Chromatogram>

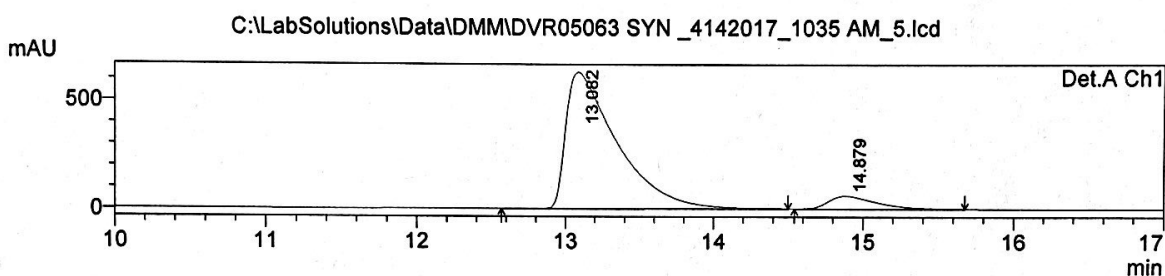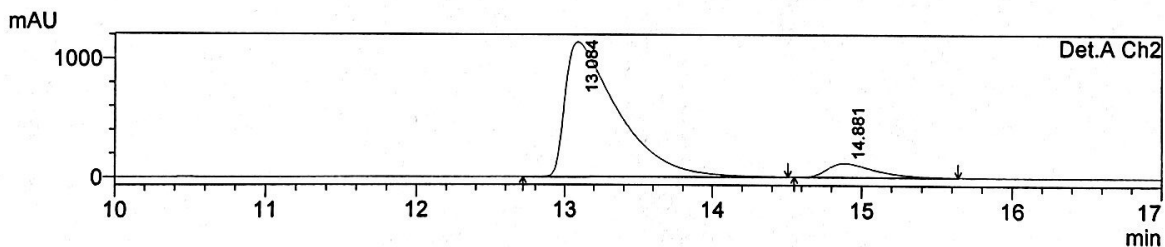

- 1 Det.A Ch1/220nm  
 2 Det.A Ch2/210nm

PeakTable

Detector A Ch1 220nm

| Peak# | Ret. Time | Area     | Height | Area %  | Height % |
|-------|-----------|----------|--------|---------|----------|
| 1     | 13.082    | 15144440 | 630793 | 91.992  | 91.337   |
| 2     | 14.879    | 1318328  | 59830  | 8.008   | 8.663    |
| Total |           | 16462767 | 690623 | 100.000 | 100.000  |

PeakTable

Detector A Ch2 210nm

| Peak# | Ret. Time | Area     | Height  | Area %  | Height % |
|-------|-----------|----------|---------|---------|----------|
| 1     | 13.084    | 28213573 | 1139857 | 91.710  | 90.757   |
| 2     | 14.881    | 2550271  | 116082  | 8.290   | 9.243    |
| Total |           | 30763844 | 1255939 | 100.000 | 100.000  |

# ==== Shimadzu LCsolution Analysis Report ====

C:\LabSolutions\Data\DMMDVR05063 ANTI RAC\_4142017\_1035 AM\_6.lcd  
 Acquired by : LC User  
 Sample Name : DVR05063 ANTI RAC  
 Sample ID : DVR05063 ANTI RAC  
 Tray# : 1  
 Vial # : 3  
 Injection Volume : 3 uL  
 Data File Name : DVR05063 ANTI RAC\_4142017\_1035 AM\_6.lcd  
 Method File Name : col2\_1isoIPA\_45min\_1ML\_220 and210.lcm  
 Batch File Name : DMM.lcb  
 Report File Name : Default.lcr  
 Data Acquired : 4/14/2017 3:13:18 PM  
 Data Processed : 4/14/2017 3:58:18 PM

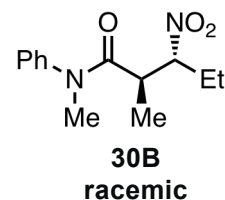

## <Chromatogram>

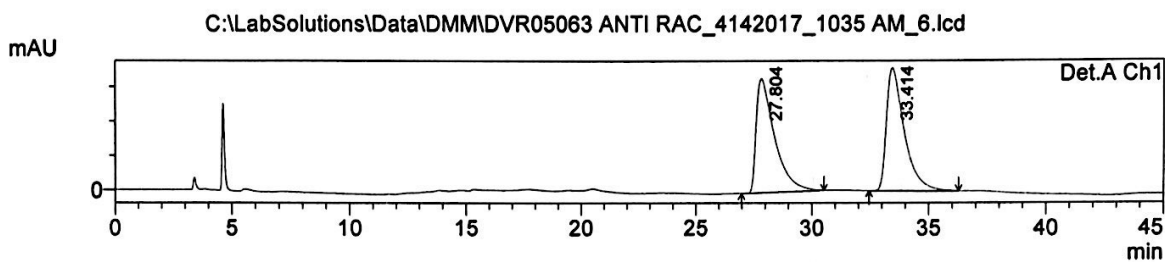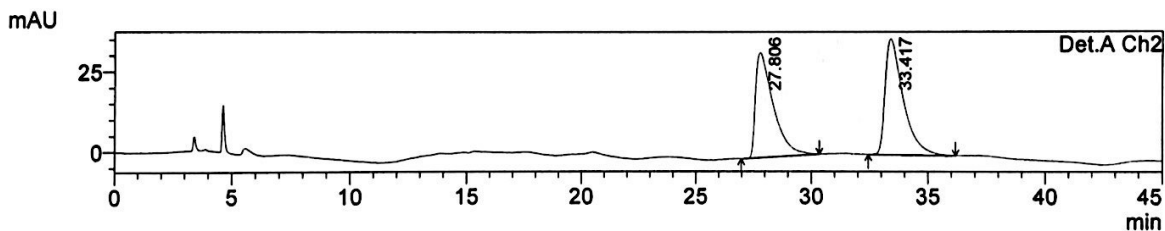

1 Det.A Ch1/220nm  
 2 Det.A Ch2/210nm

### PeakTable

Detector A Ch1 220nm

| Peak# | Ret. Time | Area    | Height | Area %  | Height % |
|-------|-----------|---------|--------|---------|----------|
| 1     | 27.804    | 918935  | 16637  | 49.096  | 48.143   |
| 2     | 33.414    | 952791  | 17920  | 50.904  | 51.857   |
| Total |           | 1871727 | 34557  | 100.000 | 100.000  |

### PeakTable

Detector A Ch2 210nm

| Peak# | Ret. Time | Area    | Height | Area %  | Height % |
|-------|-----------|---------|--------|---------|----------|
| 1     | 27.806    | 1751437 | 32953  | 47.277  | 47.555   |
| 2     | 33.417    | 1953216 | 36341  | 52.723  | 52.445   |
| Total |           | 3704653 | 69294  | 100.000 | 100.000  |

# ==== Shimadzu LCsolution Analysis Report ====

C:\LabSolutions\Data\DMM\DVR05063 ANTI\_4142017\_1035 AM\_10.lcd  
 Acquired by : LC User  
 Sample Name : DVR05063 ANTI  
 Sample ID : DVR05063 ANTI  
 Tray# : 1  
 Vial # : 4  
 Injection Volume : 3 uL  
 Data File Name : DVR05063 ANTI\_4142017\_1035 AM\_10.lcd  
 Method File Name : col2\_1isoiPA\_45min\_1ML\_220 and210.lcm  
 Batch File Name : DMM.lcb  
 Report File Name : Default.lcr  
 Data Acquired : 4/14/2017 4:39:16 PM  
 Data Processed : 4/14/2017 5:24:17 PM

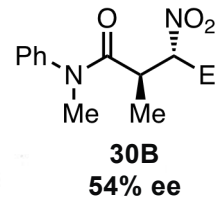

## <Chromatogram>

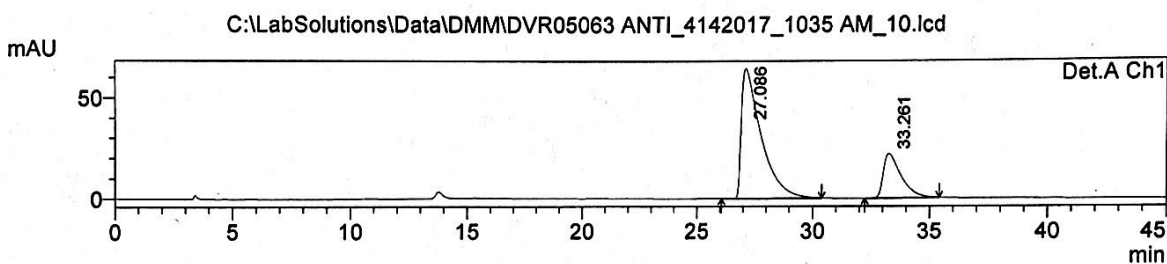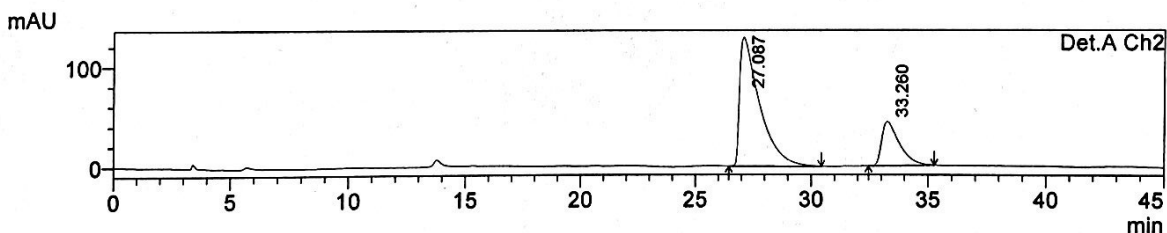

1 Det.A Ch1/220nm  
 2 Det.A Ch2/210nm

PeakTable

Detector A Ch1 220nm

| Peak# | Ret. Time | Area    | Height | Area %  | Height % |
|-------|-----------|---------|--------|---------|----------|
| 1     | 27.086    | 3841588 | 64821  | 76.841  | 74.649   |
| 2     | 33.261    | 1157821 | 22014  | 23.159  | 25.351   |
| Total |           | 4999409 | 86835  | 100.000 | 100.000  |

PeakTable

Detector A Ch2 210nm

| Peak# | Ret. Time | Area     | Height | Area %  | Height % |
|-------|-----------|----------|--------|---------|----------|
| 1     | 27.087    | 7752624  | 130001 | 76.981  | 74.578   |
| 2     | 33.260    | 2318221  | 44313  | 23.019  | 25.422   |
| Total |           | 10070845 | 174314 | 100.000 | 100.000  |



# ==== Shimadzu LCsolution Analysis Report ====

C:\LabSolutions\Data\DMM\DVR05060 F1 RAC\_3252017\_1721 PM\_2.lcd  
 Acquired by : LC User  
 Sample Name : DVR05060 F1 RAC  
 Sample ID : DVR05060 F1 RAC  
 Tray# : 1  
 Vial # : 2  
 Injection Volume : 3 uL  
 Data File Name : DVR05060 F1 RAC\_3252017\_1721 PM\_2.lcd  
 Method File Name : col6\_2isoIPA\_45min\_1ML\_210and220.lcm  
 Batch File Name : DMM.lcb  
 Report File Name : Default.lcr  
 Data Acquired : 3/25/2017 5:32:40 PM  
 Data Processed : 5/8/2017 10:08:00 AM

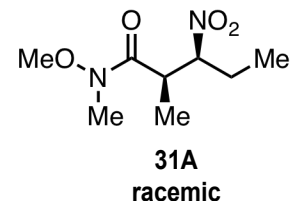

## <Chromatogram>

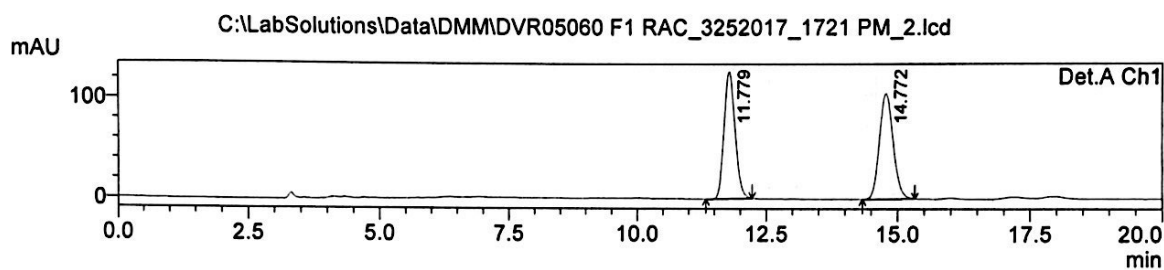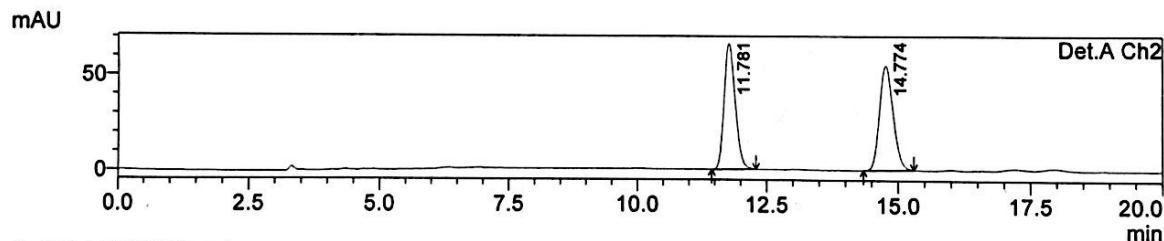

1 Det.A Ch1/210nm  
 2 Det.A Ch2/220nm

PeakTable

Detector A Ch1 210nm

| Peak# | Ret. Time | Area    | Height | Area %  | Height % |
|-------|-----------|---------|--------|---------|----------|
| 1     | 11.779    | 1892057 | 127392 | 49.826  | 54.694   |
| 2     | 14.772    | 1905263 | 105526 | 50.174  | 45.306   |
| Total |           | 3797320 | 232918 | 100.000 | 100.000  |

PeakTable

Detector A Ch2 220nm

| Peak# | Ret. Time | Area    | Height | Area %  | Height % |
|-------|-----------|---------|--------|---------|----------|
| 1     | 11.781    | 991580  | 66313  | 50.039  | 54.729   |
| 2     | 14.774    | 990019  | 54853  | 49.961  | 45.271   |
| Total |           | 1981598 | 121166 | 100.000 | 100.000  |



# ==== Shimadzu LCsolution Analysis Report ====

C:\LabSolutions\Data\DMM\DVR05058AF2\_3302017\_1816 PM\_5.lcd  
 Acquired by : LC User  
 Sample Name : DVR05058AF2  
 Sample ID : DVR05058AF2  
 Tray# : 1  
 Vail # : 1  
 Injection Volume : 2 uL  
 Data File Name : DVR05058AF2\_3302017\_1816 PM\_5.lcd  
 Method File Name : col6\_2isoiPA\_45min\_1ML\_210and220.lcm  
 Batch File Name : DMM.lcb  
 Report File Name : Default.lcr  
 Data Acquired : 3/30/2017 7:37:52 PM  
 Data Processed : 3/30/2017 8:22:54 PM

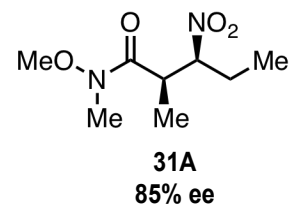

## <Chromatogram>

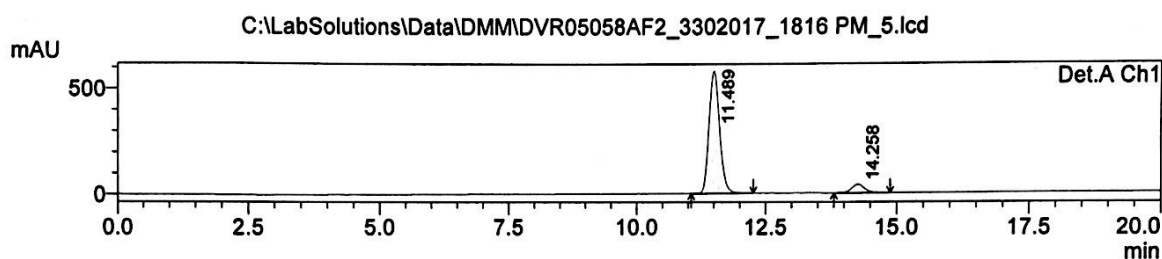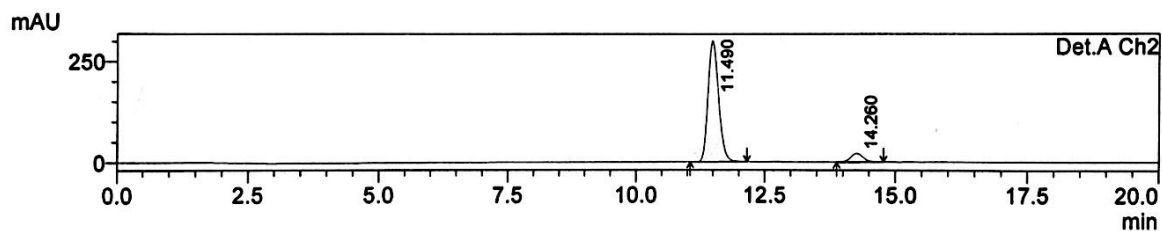

1 Det.A Ch1/210nm  
 2 Det.A Ch2/220nm

PeakTable

Detector A Ch1 210nm

| Peak# | Ret. Time | Area    | Height | Area %  | Height % |
|-------|-----------|---------|--------|---------|----------|
| 1     | 11.489    | 8231186 | 578832 | 92.537  | 93.512   |
| 2     | 14.258    | 663851  | 40164  | 7.463   | 6.488    |
| Total |           | 8895037 | 618996 | 100.000 | 100.000  |

PeakTable

Detector A Ch2 220nm

| Peak# | Ret. Time | Area    | Height | Area %  | Height % |
|-------|-----------|---------|--------|---------|----------|
| 1     | 11.490    | 4294914 | 301110 | 92.621  | 93.458   |
| 2     | 14.260    | 342155  | 21079  | 7.379   | 6.542    |
| Total |           | 4637070 | 322189 | 100.000 | 100.000  |

# ==== Shimadzu LCsolution Analysis Report ====

C:\LabSolutions\Data\DMM\DVR05060 F1 RAC\_3252017\_1721 PM\_2.lcd  
 Acquired by : LC User  
 Sample Name : DVR05060 F1 RAC  
 Sample ID : DVR05060 F1 RAC  
 Tray# : 1  
 Vial # : 2  
 Injection Volume : 3 uL  
 Data File Name : DVR05060 F1 RAC\_3252017\_1721 PM\_2.lcd  
 Method File Name : col6\_2isoiPA\_45min\_1ML\_210and220.lcm  
 Batch File Name : DMM.lcb  
 Report File Name : Default.lcr  
 Data Acquired : 3/25/2017 5:32:40 PM  
 Data Processed : 3/26/2017 4:45:00 PM

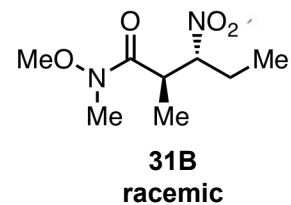

## <Chromatogram>

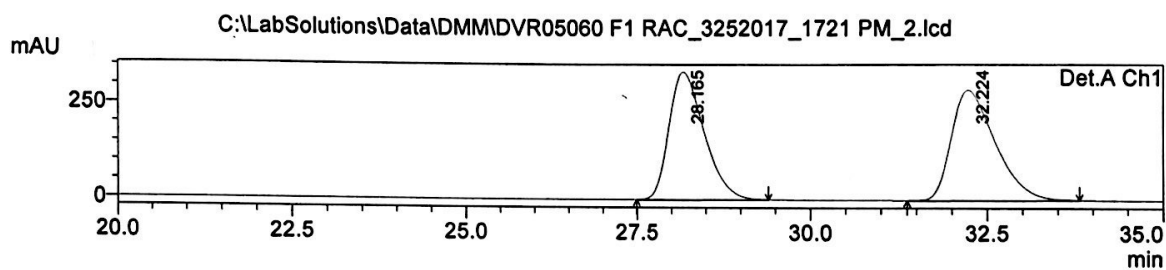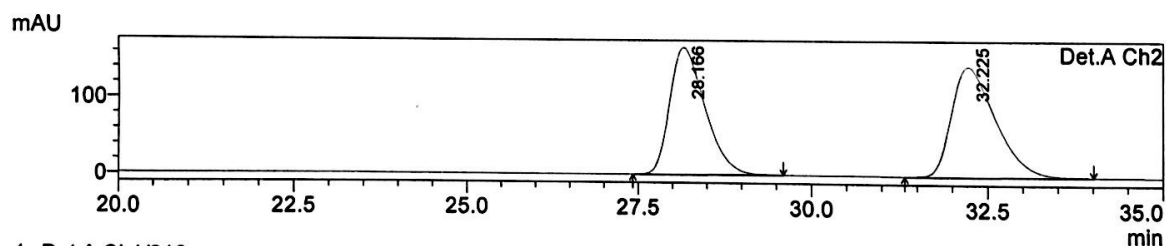

1 Det.A Ch1/210nm  
 2 Det.A Ch2/220nm

PeakTable

Detector A Ch1 210nm

| Peak# | Ret. Time | Area     | Height | Area %  | Height % |
|-------|-----------|----------|--------|---------|----------|
| 1     | 28.165    | 11971890 | 336483 | 48.889  | 53.786   |
| 2     | 32.224    | 12516074 | 289114 | 51.111  | 46.214   |
| Total |           | 24487965 | 625597 | 100.000 | 100.000  |

PeakTable

Detector A Ch2 220nm

| Peak# | Ret. Time | Area     | Height | Area %  | Height % |
|-------|-----------|----------|--------|---------|----------|
| 1     | 28.166    | 5944017  | 166301 | 48.907  | 53.781   |
| 2     | 32.225    | 6209711  | 142920 | 51.093  | 46.219   |
| Total |           | 12153728 | 309221 | 100.000 | 100.000  |

# ==== Shimadzu LCsolution Analysis Report ====

C:\LabSolutions\Data\DMM\DVR05058 SYN AND ANTI\_3252017\_1721 PM\_8.lcd  
 Acquired by : LC User  
 Sample Name : DVR05058 SYN AND ANTI  
 Sample ID : DVR05058 SYN AND ANTI  
 Tray# : 1  
 Vail # : 3  
 Injection Volume : 3 uL  
 Data File Name : DVR05058 SYN AND ANTI\_3252017\_1721 PM\_8.lcd  
 Method File Name : col6\_2isoiPA\_45min\_1ML\_210and220.lcm  
 Batch File Name : DMM.lcb  
 Report File Name : Default.lcr  
 Data Acquired : 3/25/2017 9:40:09 PM  
 Data Processed : 5/8/2017 10:44:10 AM

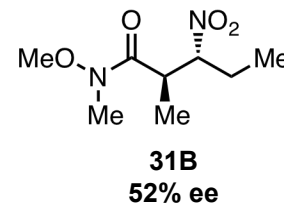

## <Chromatogram>

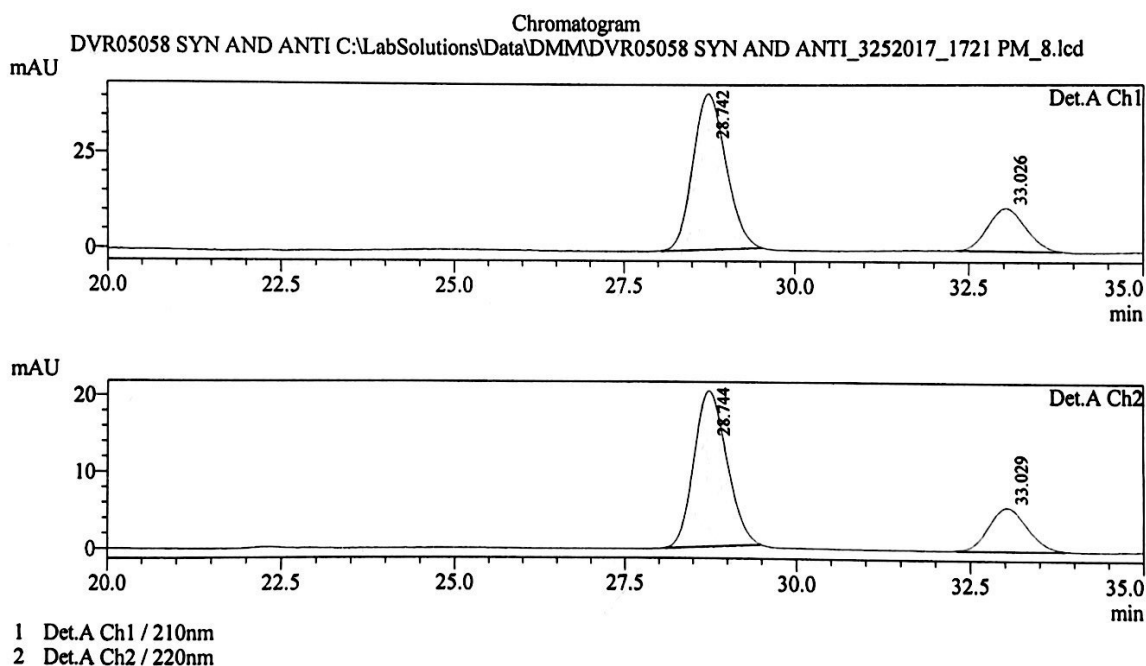

PeakTable

Detector A Ch1 210nm

| Peak# | Ret. Time | Area    | Height | Area %  | Height % |
|-------|-----------|---------|--------|---------|----------|
| 1     | 28.742    | 1395448 | 41405  | 76.647  | 78.632   |
| 2     | 33.026    | 425178  | 11252  | 23.353  | 21.368   |
| Total |           | 1820626 | 52656  | 100.000 | 100.000  |

PeakTable

Detector A Ch2 220nm

| Peak# | Ret. Time | Area   | Height | Area %  | Height % |
|-------|-----------|--------|--------|---------|----------|
| 1     | 28.744    | 681645 | 20378  | 75.992  | 78.385   |
| 2     | 33.029    | 215346 | 5619   | 24.008  | 21.615   |
| Total |           | 896991 | 25998  | 100.000 | 100.000  |

# ==== Shimadzu LCsolution Analysis Report ====

Acquired by : LC User  
 Sample Name : DVR05098 RAC  
 Sample ID : DVR05098 RAC  
 Tray# : 1  
 Vail # : 1  
 Injection Volume : 3 uL  
 Data File Name : DVR05098 RAC\_6232017\_1513 PM\_2.lcd  
 Method File Name : col1\_1isoiPA\_30min\_1ML\_220and210.lcm  
 Batch File Name : DMM.lcb  
 Report File Name : Default.lcr  
 Data Acquired : 6/23/2017 3:43:47 PM  
 Data Processed : 6/23/2017 4:13:48 PM

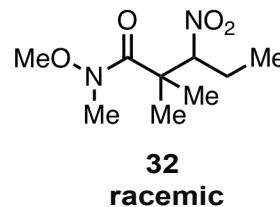

## <Chromatogram>

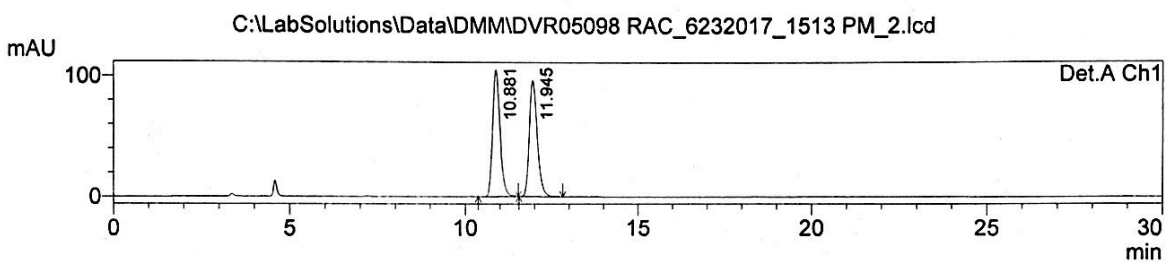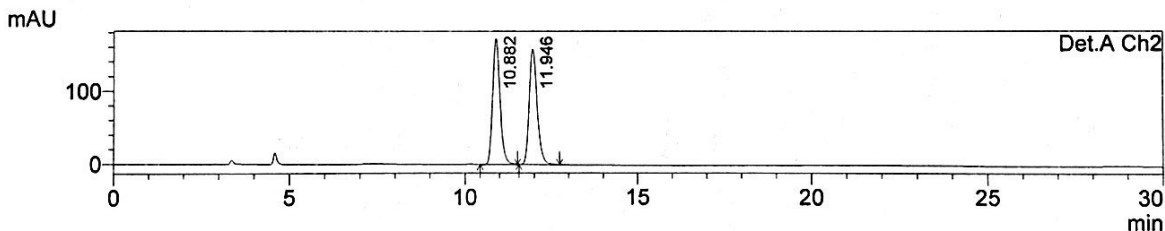

- 1 Det.A Ch1/220nm
- 2 Det.A Ch2/210nm

PeakTable

Detector A Ch1 220nm

| Peak# | Ret. Time | Area    | Height | Area %  | Height % |
|-------|-----------|---------|--------|---------|----------|
| 1     | 10.881    | 1546789 | 105485 | 49.965  | 52.192   |
| 2     | 11.945    | 1548959 | 96625  | 50.035  | 47.808   |
| Total |           | 3095748 | 202110 | 100.000 | 100.000  |

PeakTable

Detector A Ch2 210nm

| Peak# | Ret. Time | Area    | Height | Area %  | Height % |
|-------|-----------|---------|--------|---------|----------|
| 1     | 10.882    | 2537933 | 173332 | 49.986  | 52.196   |
| 2     | 11.946    | 2539398 | 158750 | 50.014  | 47.804   |
| Total |           | 5077332 | 332082 | 100.000 | 100.000  |

# ==== Shimadzu LCsolution Analysis Report ====

C:\LabSolutions\Data\DMM\DVR05098\_6232017\_1513 PM\_3.lcd  
 Acquired by : LC User  
 Sample Name : DVR05098  
 Sample ID : DVR05098  
 Tray# : 1  
 Vail # : 2  
 Injection Volume : 3 uL  
 Data File Name : DVR05098\_6232017\_1513 PM\_3.lcd  
 Method File Name : col1\_1isoiPA\_30min\_1ML\_220and210.lcm  
 Batch File Name : DMM.lcb  
 Report File Name : Default.lcr  
 Data Acquired : 6/23/2017 4:14:22 PM  
 Data Processed : 6/23/2017 4:44:24 PM

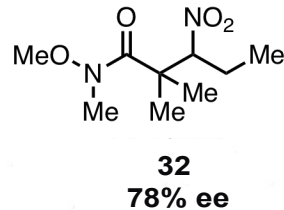

## <Chromatogram>

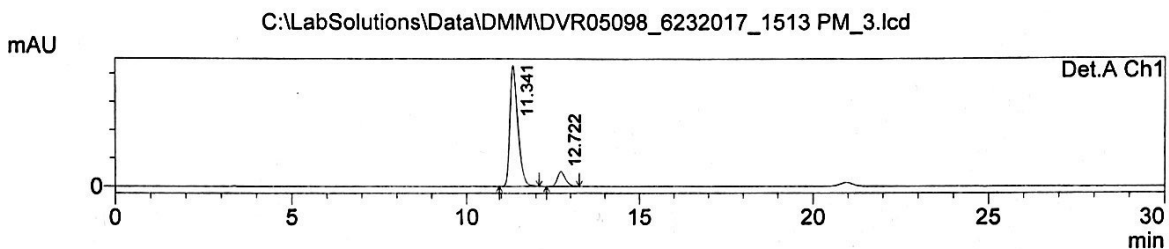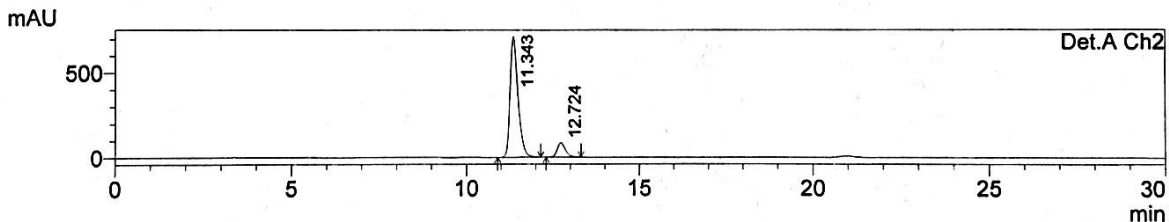

1 Det.A Ch1/220nm  
 2 Det.A Ch2/210nm

PeakTable

Detector A Ch1 220nm

| Peak# | Ret. Time | Area    | Height | Area %  | Height % |
|-------|-----------|---------|--------|---------|----------|
| 1     | 11.341    | 6877766 | 429717 | 88.925  | 89.090   |
| 2     | 12.722    | 856564  | 52623  | 11.075  | 10.910   |
| Total |           | 7734330 | 482340 | 100.000 | 100.000  |

PeakTable

Detector A Ch2 210nm

| Peak# | Ret. Time | Area     | Height | Area %  | Height % |
|-------|-----------|----------|--------|---------|----------|
| 1     | 11.343    | 11403339 | 714499 | 88.999  | 89.219   |
| 2     | 12.724    | 1409584  | 86336  | 11.001  | 10.781   |
| Total |           | 12812924 | 800835 | 100.000 | 100.000  |

# ==== Shimadzu LCsolution Analysis Report ====

C:\LabSolutions\Data\DMM\DVR05091 rac\_6162017\_2153 PM\_2.lcd  
 Acquired by : LC User  
 Sample Name : DVR05091 rac  
 Sample ID : DVR05091 rac  
 Tray# : 1  
 Vial # : 1  
 Injection Volume : 3 uL  
 Data File Name : DVR05091 rac\_6162017\_2153 PM\_2.lcd  
 Method File Name : col1\_1isoiPA\_30min\_1ML\_220and210.lcm  
 Batch File Name : DMM.lcb  
 Report File Name : Default.lcr  
 Data Acquired : 6/16/2017 10:08:59 PM  
 Data Processed : 6/16/2017 10:39:00 PM

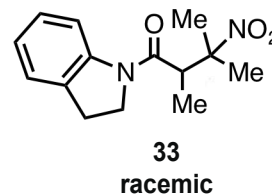

## <Chromatogram>

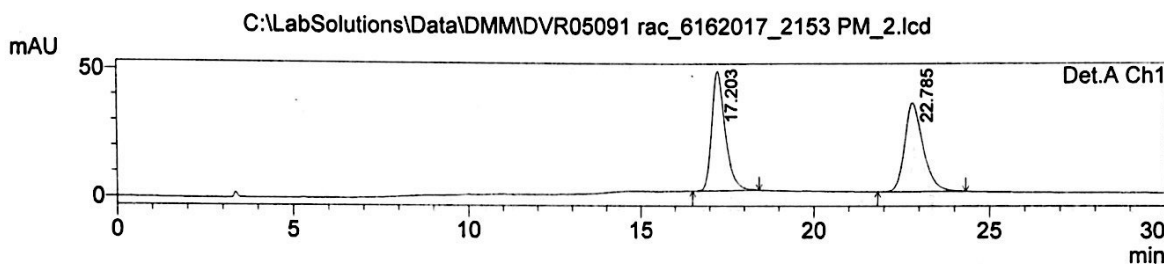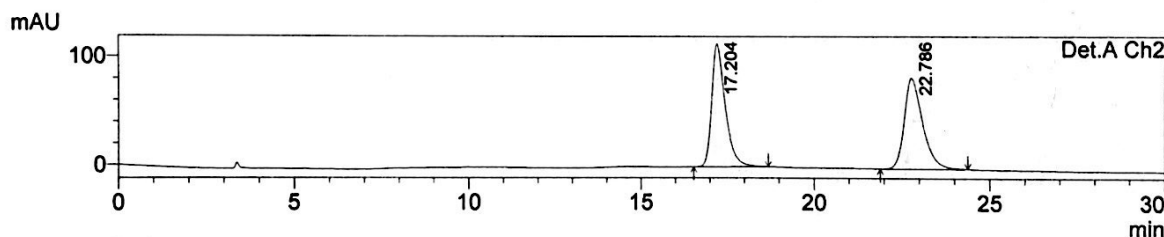

- 1 Det.A Ch1/220nm
- 2 Det.A Ch2/210nm

PeakTable

Detector A Ch1 220nm

| Peak# | Ret. Time | Area    | Height | Area %  | Height % |
|-------|-----------|---------|--------|---------|----------|
| 1     | 17.203    | 1278229 | 47202  | 50.021  | 57.413   |
| 2     | 22.785    | 1277175 | 35013  | 49.979  | 42.587   |
| Total |           | 2555404 | 82214  | 100.000 | 100.000  |

PeakTable

Detector A Ch2 210nm

| Peak# | Ret. Time | Area    | Height | Area %  | Height % |
|-------|-----------|---------|--------|---------|----------|
| 1     | 17.204    | 3112654 | 114185 | 50.327  | 57.542   |
| 2     | 22.786    | 3072236 | 84254  | 49.673  | 42.458   |
| Total |           | 6184890 | 198439 | 100.000 | 100.000  |

# ==== Shimadzu LCsolution Analysis Report ====

C:\LabSolutions\Data\DMM\DVR05091\_6162017\_2153 PM\_6.lcd  
 Acquired by : LC User  
 Sample Name : DVR05091  
 Sample ID : DVR05091  
 Tray# : 1  
 Vial # : 2  
 Injection Volume : 3 uL  
 Data File Name : DVR05091\_6162017\_2153 PM\_6.lcd  
 Method File Name : col1\_1isoiPA\_30min\_1ML\_220and210.lcm  
 Batch File Name : DMM.lcb  
 Report File Name : Default.lcr  
 Data Acquired : 6/16/2017 11:04:57 PM  
 Data Processed : 6/16/2017 11:35:00 PM

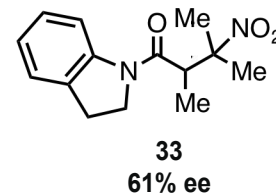

## <Chromatogram>

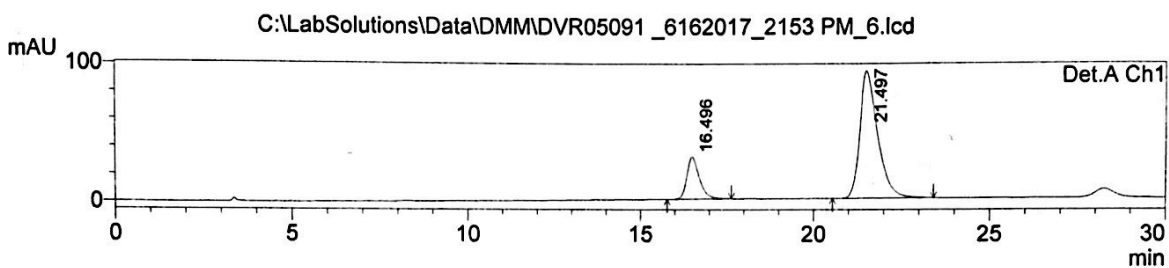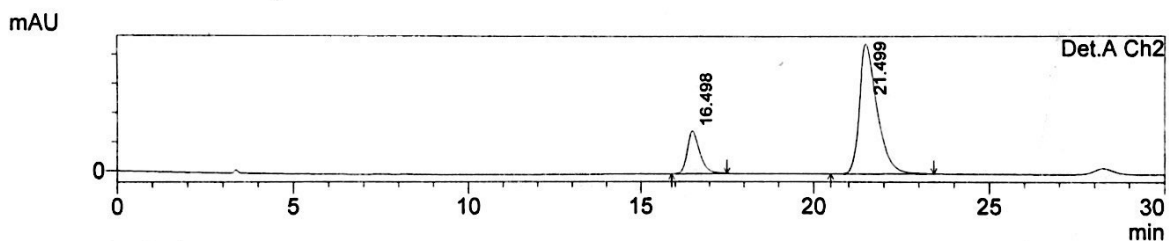

- 1 Det.A Ch1/220nm
- 2 Det.A Ch2/210nm

PeakTable

Detector A Ch1 220nm

| Peak# | Ret. Time | Area    | Height | Area %  | Height % |
|-------|-----------|---------|--------|---------|----------|
| 1     | 16.496    | 783513  | 30863  | 19.410  | 25.034   |
| 2     | 21.497    | 3253029 | 92425  | 80.590  | 74.966   |
| Total |           | 4036541 | 123288 | 100.000 | 100.000  |

PeakTable

Detector A Ch2 210nm

| Peak# | Ret. Time | Area    | Height | Area %  | Height % |
|-------|-----------|---------|--------|---------|----------|
| 1     | 16.498    | 1856427 | 73951  | 19.108  | 24.742   |
| 2     | 21.499    | 7859066 | 224938 | 80.892  | 75.258   |
| Total |           | 9715493 | 298889 | 100.000 | 100.000  |



## ==== Shimadzu LCsolution Analysis Report ====

C:\LabSolutions\Data\DMM\DVR04232 rac 1\_10272016\_853 AM\_2.lcd  
 Acquired by : LC User  
 Sample Name : DVR04232 rac 1  
 Sample ID : DVR04232 rac 1  
 Tray# : 1  
 Vial # : 2  
 Injection Volume : 2 uL  
 Data File Name : DVR04232 rac 1\_10272016\_853 AM\_2.lcd  
 Method File Name : col6\_3isoiPA\_36min\_1ML\_220and210.lcm  
 Batch File Name : DMM.lcb  
 Report File Name : Default.lcr  
 Data Acquired : 10/27/2016 9:29:51 AM  
 Data Processed : 10/27/2016 10:05:55 AM

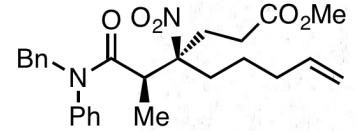

**34**  
**racemic**

### <Chromatogram>

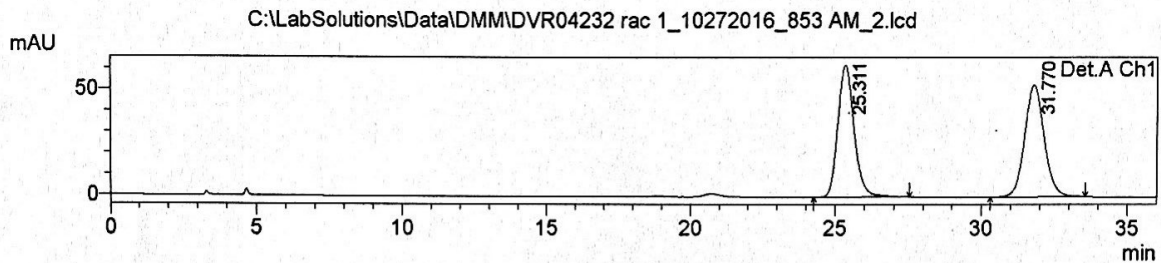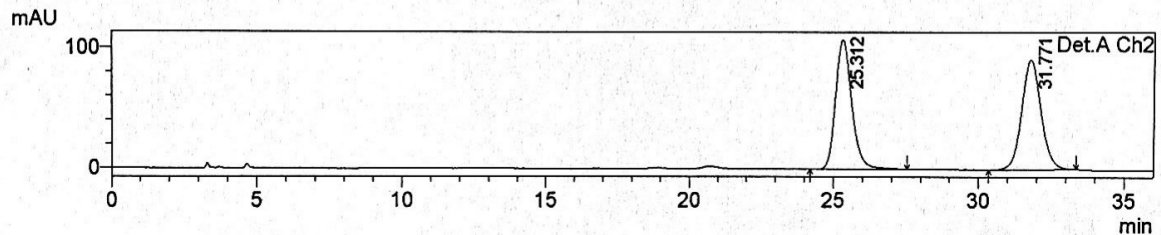

- 1 Det.A Ch1/220nm
- 2 Det.A Ch2/210nm

PeakTable

Detector A Ch1 220nm

| Peak# | Ret. Time | Area    | Height | Area %  | Height % |
|-------|-----------|---------|--------|---------|----------|
| 1     | 25.311    | 2423234 | 62422  | 49.620  | 54.151   |
| 2     | 31.770    | 2460372 | 52853  | 50.380  | 45.849   |
| Total |           | 4883607 | 115274 | 100.000 | 100.000  |

PeakTable

Detector A Ch2 210nm

| Peak# | Ret. Time | Area    | Height | Area %  | Height % |
|-------|-----------|---------|--------|---------|----------|
| 1     | 25.312    | 4202740 | 108032 | 49.810  | 54.197   |
| 2     | 31.771    | 4234796 | 91299  | 50.190  | 45.803   |
| Total |           | 8437535 | 199331 | 100.000 | 100.000  |



# ==== Shimadzu LCsolution Analysis Report ====

C:\LabSolutions\Data\DMMDVR04232 R1\_10272016\_853 AM\_6.lcd  
 Acquired by : LC User  
 Sample Name : DVR04232 R1  
 Sample ID : DVR04232 R1  
 Tray# : 1  
 Vial # : 3  
 Injection Volume : 2 uL  
 Data File Name : DVR04232 R1\_10272016\_853 AM\_6.lcd  
 Method File Name : col6\_3isoiPA\_36min\_1ML\_220and210.lcm  
 Batch File Name : DMM.lcb  
 Report File Name : Default.lcr  
 Data Acquired : 10/27/2016 10:52:50 AM  
 Data Processed : 10/27/2016 11:28:52 AM

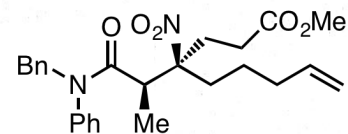

## <Chromatogram>

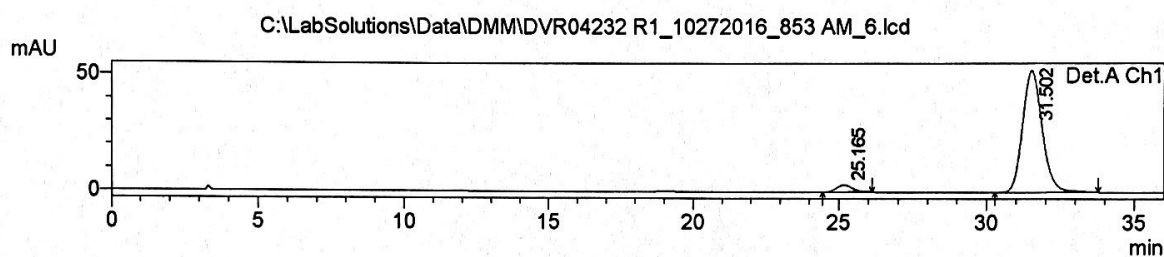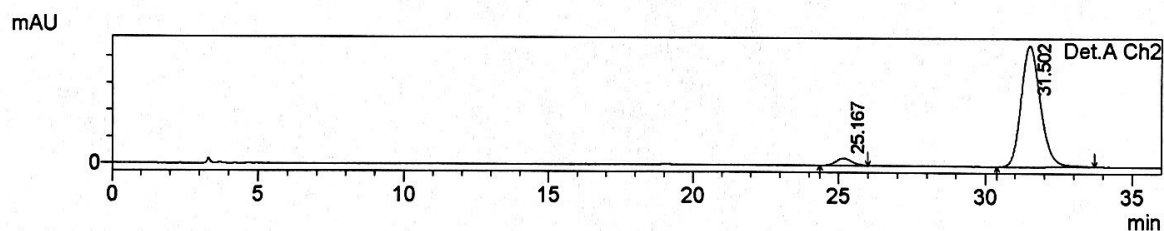

- 1 Det.A Ch1/220nm
- 2 Det.A Ch2/210nm

### PeakTable

#### Detector A Ch1 220nm

| Peak# | Ret. Time | Area    | Height | Area %  | Height % |
|-------|-----------|---------|--------|---------|----------|
| 1     | 25.165    | 113659  | 3031   | 4.515   | 5.504    |
| 2     | 31.502    | 2403724 | 52035  | 95.485  | 94.496   |
| Total |           | 2517382 | 55067  | 100.000 | 100.000  |

### PeakTable

#### Detector A Ch2 210nm

| Peak# | Ret. Time | Area    | Height | Area %  | Height % |
|-------|-----------|---------|--------|---------|----------|
| 1     | 25.167    | 199572  | 5343   | 4.590   | 5.606    |
| 2     | 31.502    | 4148749 | 89962  | 95.410  | 94.394   |
| Total |           | 4348320 | 95305  | 100.000 | 100.000  |

# ==== Shimadzu LCsolution Analysis Report ====

C:\LabSolutions\Data\DMM\DVR04233\_10272016\_853 AM\_29.lcd  
 Acquired by : LC User  
 Sample Name : DVR04233  
 Sample ID : DVR04233  
 Tray# : 1  
 Vial # : 6  
 Injection Volume : 2 uL  
 Data File Name : DVR04233\_10272016\_853 AM\_29.lcd  
 Method File Name : col6\_3isoiPA\_36min\_1ML\_220and210.lcm  
 Batch File Name : DMM.lcb  
 Report File Name : Default.lcr  
 Data Acquired : 10/28/2016 4:14:37 AM  
 Data Processed : 10/28/2016 4:50:38 AM

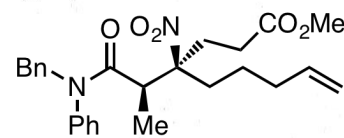

**34**  
**89% ee**

## <Chromatogram>

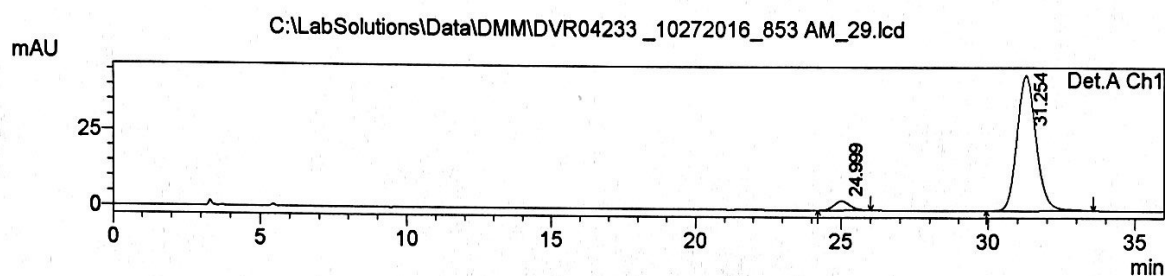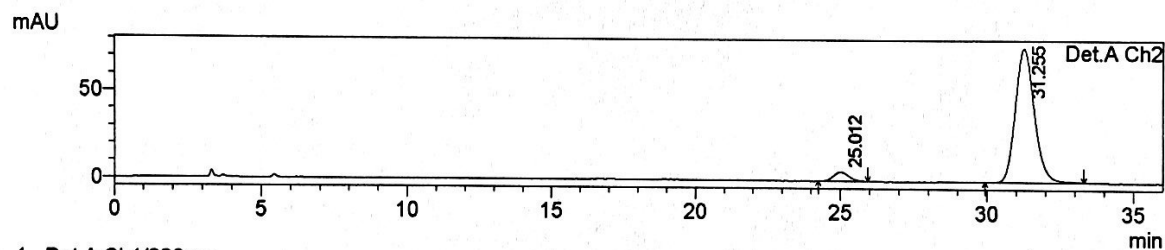

- 1 Det.A Ch1/220nm
- 2 Det.A Ch2/210nm

PeakTable

Detector A Ch1 220nm

| Peak# | Ret. Time | Area    | Height | Area %  | Height % |
|-------|-----------|---------|--------|---------|----------|
| 1     | 24.999    | 112827  | 3044   | 5.315   | 6.435    |
| 2     | 31.254    | 2010087 | 44252  | 94.685  | 93.565   |
| Total |           | 2122914 | 47296  | 100.000 | 100.000  |

PeakTable

Detector A Ch2 210nm

| Peak# | Ret. Time | Area    | Height | Area %  | Height % |
|-------|-----------|---------|--------|---------|----------|
| 1     | 25.012    | 191251  | 5259   | 5.234   | 6.440    |
| 2     | 31.255    | 3462427 | 76405  | 94.766  | 93.560   |
| Total |           | 3653678 | 81664  | 100.000 | 100.000  |

# ==== Shimadzu LCsolution Analysis Report ====

C:\LabSolutions\Data\DMM\DVR04264 RAC 1\_11302016\_2048 PM\_2.lcd  
 Acquired by : LC User  
 Sample Name : DVR04264 RAC 1  
 Sample ID : DVR04264 RAC 1  
 Tray# : 1  
 Vial # : 3  
 Injection Volume : 3 uL  
 Data File Name : DVR04264 RAC 1\_11302016\_2048 PM\_2.lcd  
 Method File Name : col1\_2isoIPA\_15min\_1ML\_254and210.lcm  
 Batch File Name : DMM.lcb  
 Report File Name : Default.lcr  
 Data Acquired : 11/30/2016 9:04:28 PM  
 Data Processed : 11/30/2016 9:19:30 PM

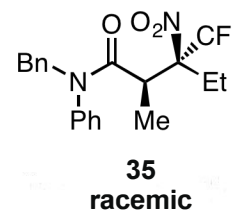

## <Chromatogram>

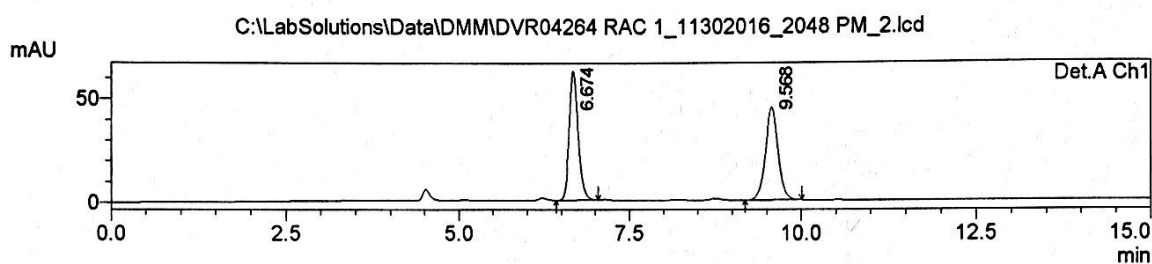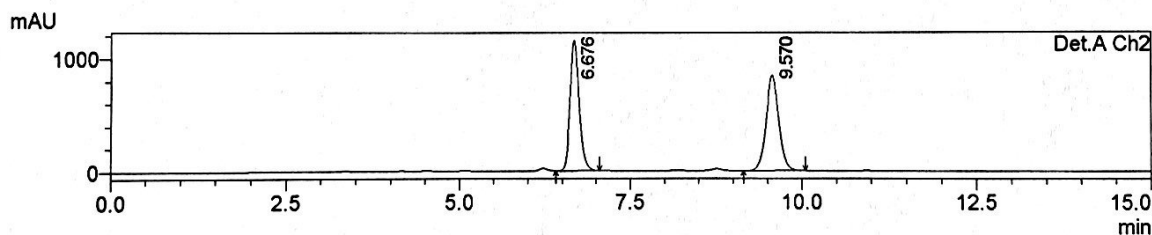

- 1 Det.A Ch1/254nm
- 2 Det.A Ch2/210nm

PeakTable

Detector A Ch1 254nm

| Peak# | Ret. Time | Area    | Height | Area %  | Height % |
|-------|-----------|---------|--------|---------|----------|
| 1     | 6.674     | 564738  | 62397  | 49.815  | 58.217   |
| 2     | 9.568     | 568939  | 44783  | 50.185  | 41.783   |
| Total |           | 1133677 | 107181 | 100.000 | 100.000  |

PeakTable

Detector A Ch2 210nm

| Peak# | Ret. Time | Area     | Height  | Area %  | Height % |
|-------|-----------|----------|---------|---------|----------|
| 1     | 6.676     | 10644936 | 1157078 | 49.477  | 57.720   |
| 2     | 9.570     | 10870050 | 847565  | 50.523  | 42.280   |
| Total |           | 21514986 | 2004643 | 100.000 | 100.000  |

# ==== Shimadzu LCsolution Analysis Report ====

C:\LabSolutions\Data\DMM\DVR04264\_11292016\_2144 PM\_6.lcd  
 Acquired by : LC User  
 Sample Name : DVR04264  
 Sample ID : DVR04264  
 Tray# : 1  
 Vial # : 4  
 Injection Volume : 2 uL  
 Data File Name : DVR04264\_11292016\_2144 PM\_6.lcd  
 Method File Name : col1\_2isoiPA\_15min\_1ML\_254and210.lcm  
 Batch File Name : DMM.lcb  
 Report File Name : Default.lcr  
 Data Acquired : 11/29/2016 10:40:54 PM  
 Data Processed : 11/29/2016 10:55:57 PM

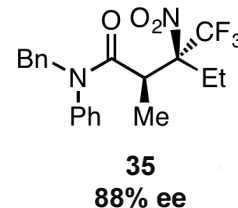

## <Chromatogram>

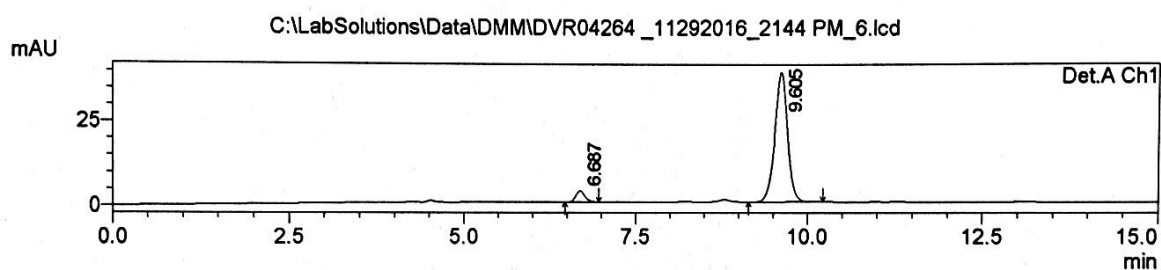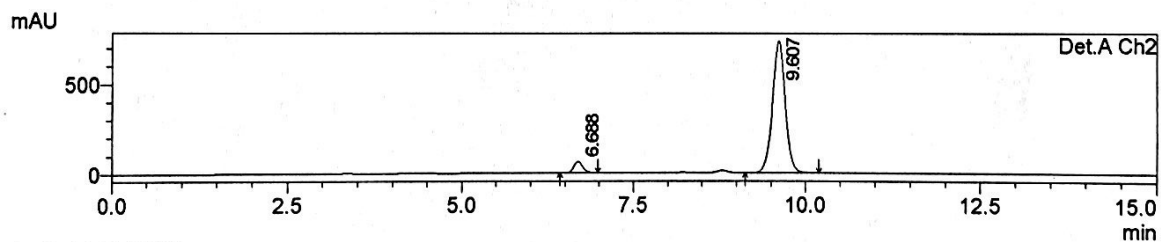

- 1 Det.A Ch1/254nm  
 2 Det.A Ch2/210nm

PeakTable

Detector A Ch1 254nm

| Peak# | Ret. Time | Area   | Height | Area %  | Height % |
|-------|-----------|--------|--------|---------|----------|
| 1     | 6.687     | 29874  | 3354   | 5.685   | 7.954    |
| 2     | 9.605     | 495594 | 38805  | 94.315  | 92.046   |
| Total |           | 525468 | 42159  | 100.000 | 100.000  |

PeakTable

Detector A Ch2 210nm

| Peak# | Ret. Time | Area     | Height | Area %  | Height % |
|-------|-----------|----------|--------|---------|----------|
| 1     | 6.688     | 581319   | 64771  | 5.780   | 8.074    |
| 2     | 9.607     | 9476777  | 737467 | 94.220  | 91.926   |
| Total |           | 10058095 | 802238 | 100.000 | 100.000  |



# ==== Shimadzu LCsolution Analysis Report ====

C:\LabSolutions\Data\DMM\DVR04265\_11302016\_2048 PM\_6.lcd  
 Acquired by : LC User  
 Sample Name : DVR04265  
 Sample ID : DVR04265  
 Tray# : 1  
 Vial # : 4  
 Injection Volume : 2 uL  
 Data File Name : DVR04265\_11302016\_2048 PM\_6.lcd  
 Method File Name : col1\_2isoiPA\_15min\_1ML\_254and210.lcm  
 Batch File Name : DMM.lcb  
 Report File Name : Default.lcr  
 Data Acquired : 11/30/2016 9:45:24 PM  
 Data Processed : 11/30/2016 10:00:25 PM

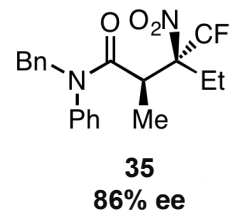

## <Chromatogram>

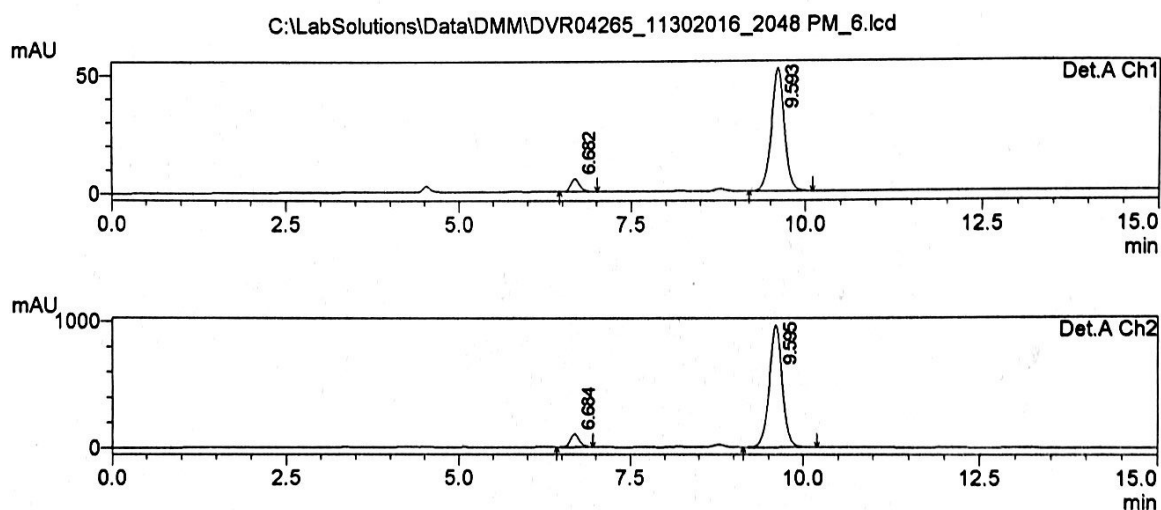

PeakTable

Detector A Ch1 254nm

| Peak# | Ret. Time | Area   | Height | Area %  | Height % |
|-------|-----------|--------|--------|---------|----------|
| 1     | 6.682     | 48174  | 5344   | 6.812   | 9.414    |
| 2     | 9.593     | 659029 | 51421  | 93.188  | 90.586   |
| Total |           | 707203 | 56765  | 100.000 | 100.000  |

PeakTable

Detector A Ch2 210nm

| Peak# | Ret. Time | Area     | Height  | Area %  | Height % |
|-------|-----------|----------|---------|---------|----------|
| 1     | 6.684     | 921805   | 102959  | 6.845   | 9.623    |
| 2     | 9.595     | 12544487 | 967024  | 93.155  | 90.377   |
| Total |           | 13466292 | 1069984 | 100.000 | 100.000  |

# ==== Shimadzu LCsolution Analysis Report ====

C:\LabSolutions\Data\DMM\DVR05019 RAC\_232017\_829 AM\_2.lcd  
 Acquired by : LC User  
 Sample Name : DVR05019 RAC  
 Sample ID : DVR05019 RAC  
 Tray# : 1  
 Vial # : 1  
 Injection Volume : 3 uL  
 Data File Name : DVR05019 RAC\_232017\_829 AM\_2.lcd  
 Method File Name : col5\_3isoiPA\_45min\_1.0ML\_254and210.lcm  
 Batch File Name : DMM.lcb  
 Report File Name : Default.lcr  
 Data Acquired : 2/3/2017 9:15:06 AM  
 Data Processed : 2/3/2017 10:00:07 AM

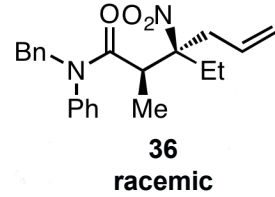

## <Chromatogram>

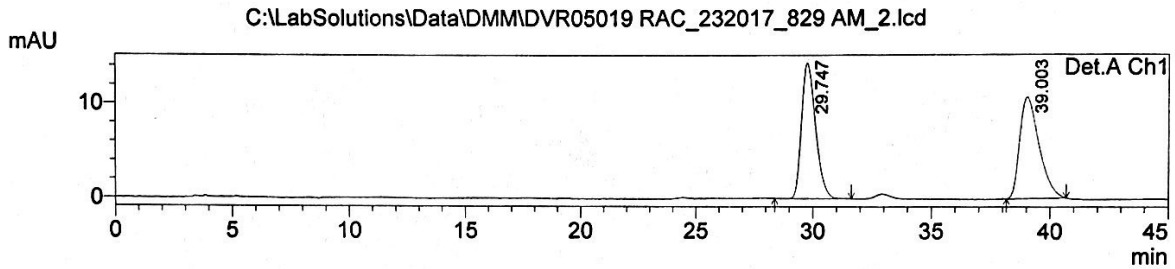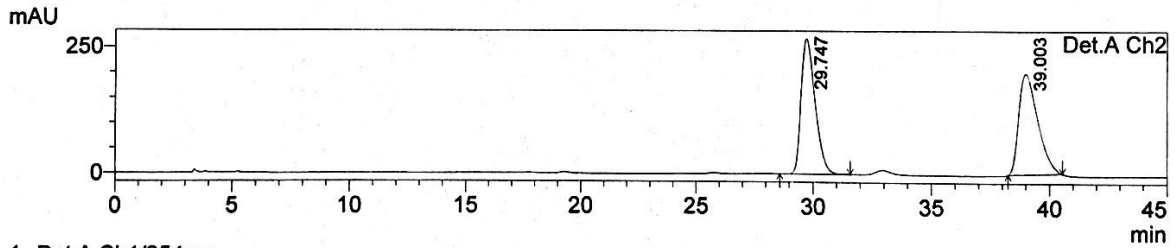

- 1 Det.A Ch1/254nm
- 2 Det.A Ch2/210nm

PeakTable

Detector A Ch1 254nm

| Peak# | Ret. Time | Area    | Height | Area %  | Height % |
|-------|-----------|---------|--------|---------|----------|
| 1     | 29.747    | 593529  | 14336  | 49.395  | 57.284   |
| 2     | 39.003    | 608072  | 10690  | 50.605  | 42.716   |
| Total |           | 1201602 | 25026  | 100.000 | 100.000  |

PeakTable

Detector A Ch2 210nm

| Peak# | Ret. Time | Area     | Height | Area %  | Height % |
|-------|-----------|----------|--------|---------|----------|
| 1     | 29.747    | 11134103 | 267848 | 50.058  | 57.486   |
| 2     | 39.003    | 11108142 | 198088 | 49.942  | 42.514   |
| Total |           | 22242245 | 465937 | 100.000 | 100.000  |

# ==== Shimadzu LCsolution Analysis Report ====

C:\LabSolutions\Data\DMM\DVR05019 D1\_232017\_829 AM\_1.lcd  
 Acquired by : LC User  
 Sample Name : DVR05019 D1  
 Sample ID : DVR05019 D1  
 Tray# : 1  
 Vial # : 2  
 Injection Volume : 3 uL  
 Data File Name : DVR05019 D1\_232017\_829 AM\_1.lcd  
 Method File Name : col5\_3isoiPA\_45min\_1.0ML\_254and210.lcm  
 Batch File Name : DMM.lcb  
 Report File Name : Default.lcr  
 Data Acquired : 2/3/2017 10:57:44 AM  
 Data Processed : 2/3/2017 11:42:46 AM

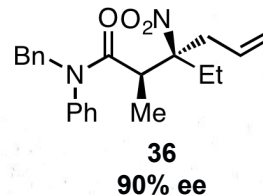

## <Chromatogram>

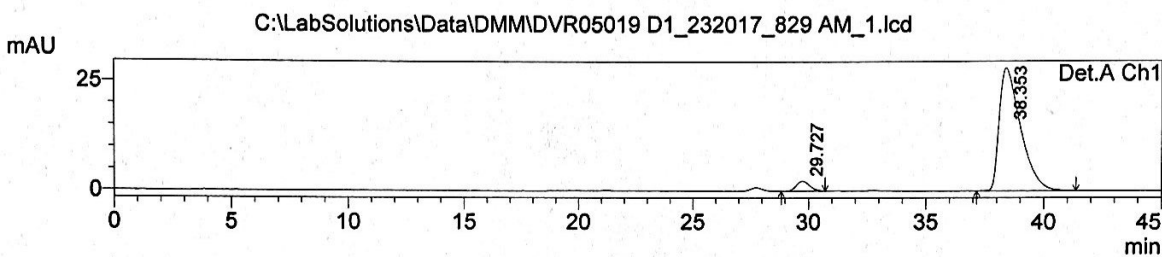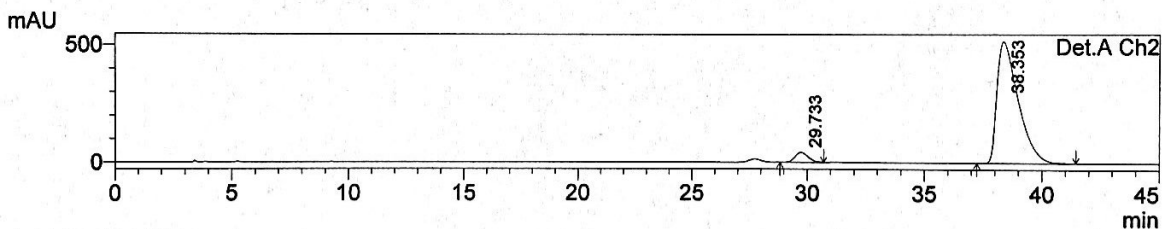

1 Det.A Ch1/254nm  
 2 Det.A Ch2/210nm

PeakTable

Detector A Ch1 254nm

| Peak# | Ret. Time | Area    | Height | Area %  | Height % |
|-------|-----------|---------|--------|---------|----------|
| 1     | 29.727    | 90114   | 2270   | 4.872   | 7.510    |
| 2     | 38.353    | 1759547 | 27962  | 95.128  | 92.490   |
| Total |           | 1849661 | 30233  | 100.000 | 100.000  |

PeakTable

Detector A Ch2 210nm

| Peak# | Ret. Time | Area     | Height | Area %  | Height % |
|-------|-----------|----------|--------|---------|----------|
| 1     | 29.733    | 1685056  | 42713  | 4.901   | 7.615    |
| 2     | 38.353    | 32699963 | 518217 | 95.099  | 92.385   |
| Total |           | 34385020 | 560930 | 100.000 | 100.000  |

Sample Name: DVR05065-1 rac IF3

```

=====
Acq. Operator   : SYSTEM
Sample Operator : SYSTEM
Acq. Instrument : LC1 Reverse DAD-WPALS           Location : 21
Injection Date  : 5/10/2017 12:27:17 PM
                                           Inj Volume : 5.000 µl
Acq. Method     : C:\Chem32\1\Methods\BZV_Initial_05mL_lowerslope.M
Last changed    : 5/10/2017 12:23:38 PM by SYSTEM
                  (modified after loading)
Analysis Method : C:\Chem32\1\Methods\BZV_Initial_05mL_lowerslope.M
Last changed    : 12/6/2016 3:08:01 PM by SYSTEM
Sample Info     : 1 min 10/90 MeCN/water
                  30 min gradient 35/65 MeCN/H2O
                  30 min hold 35/65 MeCN/H2O
                  4 min 90/10 MeCN/H2o Flush
                  IF-3 rac
                  1.0 mL/min
    
```

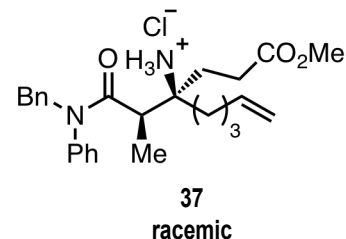

Additional Info : Peak(s) manually integrated

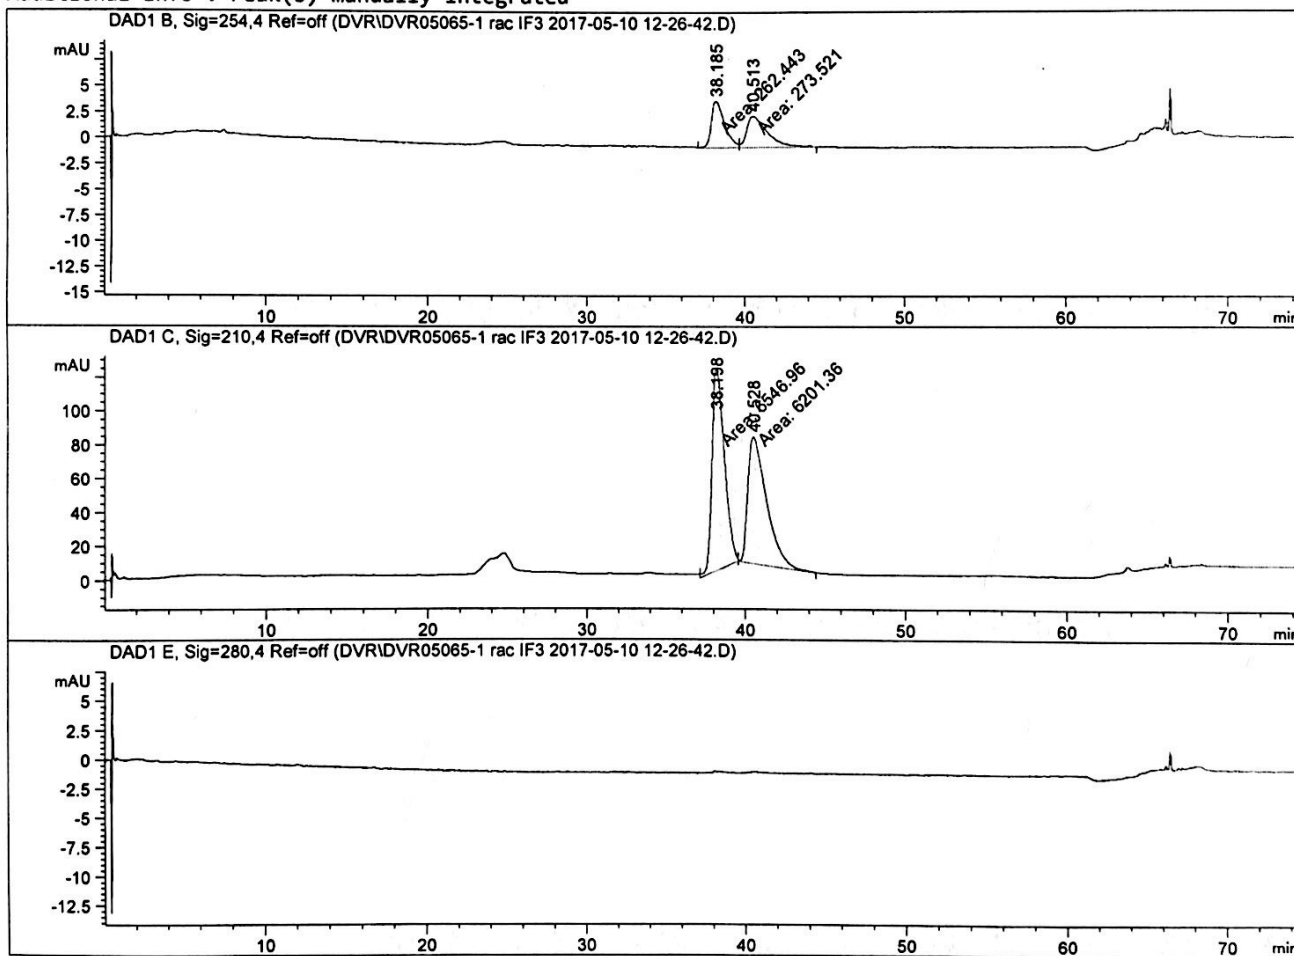



=====  
Area Percent Report  
=====

Sorted By : Signal  
Multiplier : 1.0000  
Dilution : 1.0000  
Sample Amount: : 5.00000 [ng/ul] (not used in calc.)  
Use Multiplier & Dilution Factor with ISTDs

Signal 1: DAD1 B, Sig=254,4 Ref=off

| Peak # | RetTime [min] | Type | Width [min] | Area [mAU*s] | Height [mAU] | Area %  |
|--------|---------------|------|-------------|--------------|--------------|---------|
| 1      | 38.185        | MF   | 0.9771      | 262.44263    | 4.47667      | 48.9665 |
| 2      | 40.513        | FM   | 1.5147      | 273.52121    | 3.00964      | 51.0335 |

Totals : 535.96384 7.48630

Signal 2: DAD1 C, Sig=210,4 Ref=off

| Peak # | RetTime [min] | Type | Width [min] | Area [mAU*s] | Height [mAU] | Area %  |
|--------|---------------|------|-------------|--------------|--------------|---------|
| 1      | 38.198        | MM   | 0.9071      | 6546.96143   | 120.28767    | 51.3555 |
| 2      | 40.528        | MM   | 1.3773      | 6201.35938   | 75.04160     | 48.6445 |

Totals : 1.27483e4 195.32926

Signal 3: DAD1 E, Sig=280,4 Ref=off

=====  
\*\*\* End of Report \*\*\*

=====  
Acq. Operator : SYSTEM  
Sample Operator : SYSTEM  
Acq. Instrument : LC1 Reverse DAD-WPALS Location : 21  
Injection Date : 5/10/2017 2:06:57 PM  
Inj Volume : 5.000 µl  
Acq. Method : C:\Chem32\1\Methods\BZV\_Initial\_05mL\_lowerslope.M  
Last changed : 5/10/2017 2:03:03 PM by SYSTEM  
(modified after loading)  
Analysis Method : C:\Chem32\1\Methods\BZV\_Initial\_05mL\_lower  
Last changed : 12/6/2016 3:08:01 PM by SYSTEM  
Sample Info : 1 min 10/90 MeCN/water  
30 min gradient 35/65 MeCN/H2O  
30 min hold 35/65 MeCN/H2O  
4 min 90/10 MeCN/H2o Flush  
IF-3 rac  
1.0 mL/min

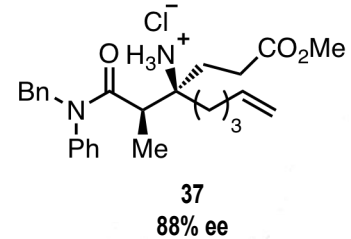

Additional Info : Peak(s) manually integrated

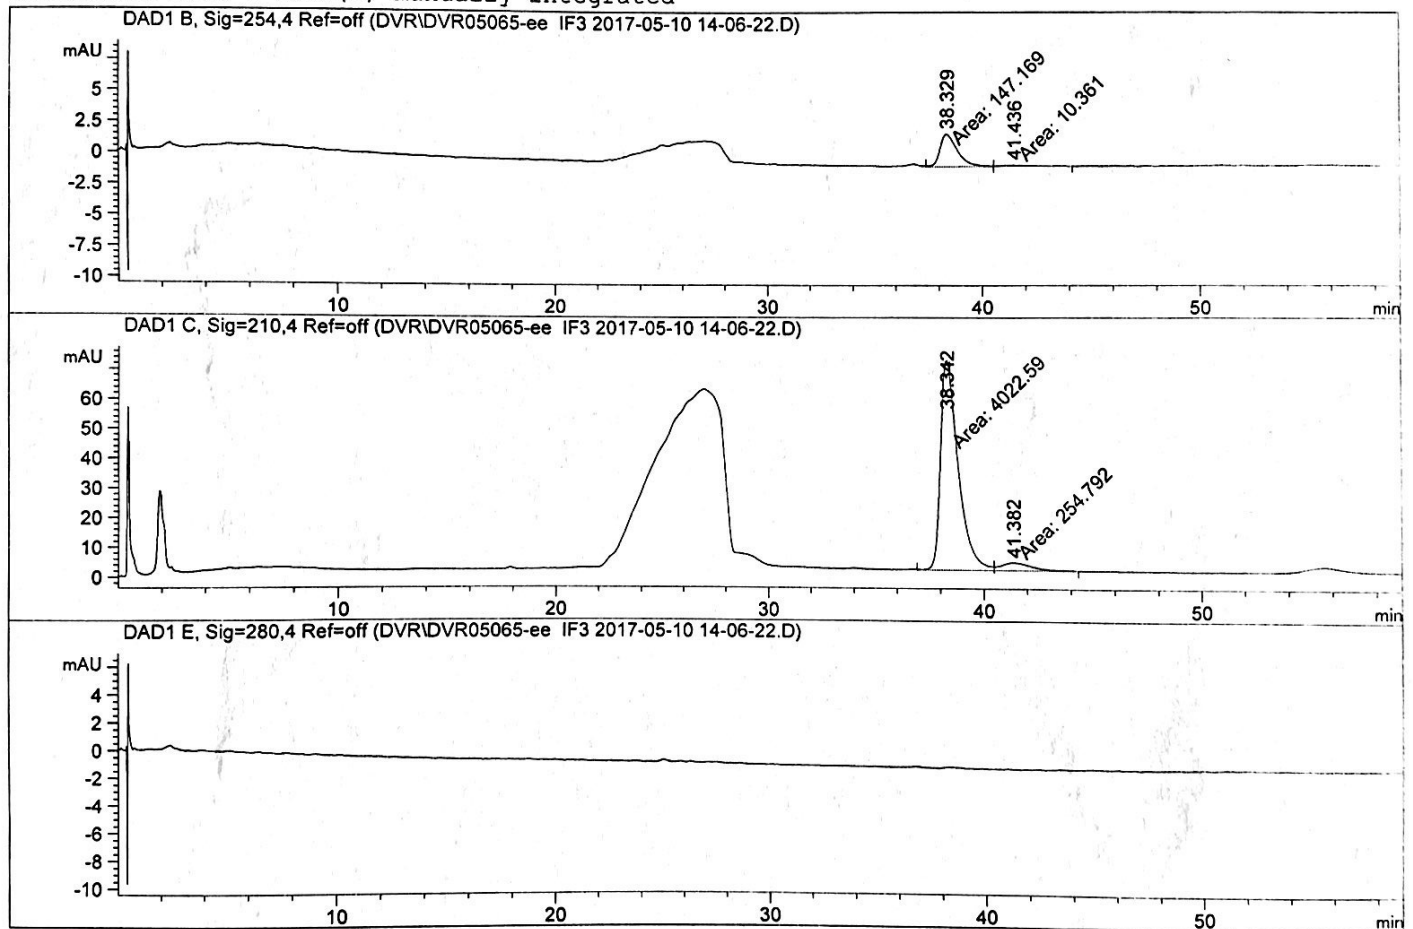

=====  
Area Percent Report  
=====

Sorted By : Signal  
Multiplier : 1.0000  
Dilution : 1.0000  
Sample Amount: : 5.00000 [ng/ul] (not used in calc.)  
Use Multiplier & Dilution Factor with ISTDs

Signal 1: DAD1 B, Sig=254,4 Ref=off

| Peak # | RetTime [min] | Type | Width [min] | Area [mAU*s] | Height [mAU] | Area %  |
|--------|---------------|------|-------------|--------------|--------------|---------|
| 1      | 38.329        | MF T | 0.9395      | 147.16916    | 2.61075      | 93.4228 |
| 2      | 41.436        | FM T | 1.4913      | 10.36101     | 1.15792e-1   | 6.5772  |

Totals : 157.53017 2.72654

Signal 2: DAD1 C, Sig=210,4 Ref=off

| Peak # | RetTime [min] | Type | Width [min] | Area [mAU*s] | Height [mAU] | Area %  |
|--------|---------------|------|-------------|--------------|--------------|---------|
| 1      | 38.342        | MF T | 1.1691      | 4022.58813   | 71.16277     | 94.0433 |
| 2      | 41.382        | FM T | 1.6251      | 254.79185    | 2.61314      | 5.9567  |

Totals : 4277.37999 73.77592

Signal 3: DAD1 E, Sig=280,4 Ref=off

=====  
\*\*\* End of Report \*\*\*

# ==== Shimadzu LCsolution Analysis Report ====

C:\LabSolutions\Data\DMM\DVR04296 rac\_1122017\_1914 PM\_2.lcd  
 Acquired by : LC User  
 Sample Name : DVR04296 rac  
 Sample ID : DVR04296 rac  
 Tray# : 1  
 Vail # : 1  
 Injection Volume : 5 uL  
 Data File Name : DVR04296 rac\_1122017\_1914 PM\_2.lcd  
 Method File Name : col1\_5isoiPA\_30min\_1ML\_220and210.lcm  
 Batch File Name : DMM.lcb  
 Report File Name : Default.lcr  
 Data Acquired : 1/12/2017 7:45:40 PM  
 Data Processed : 1/12/2017 8:15:42 PM

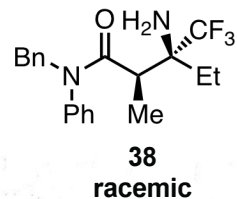

## <Chromatogram>

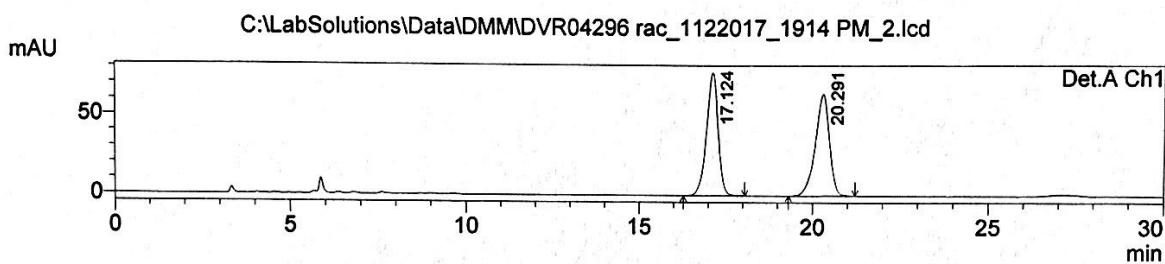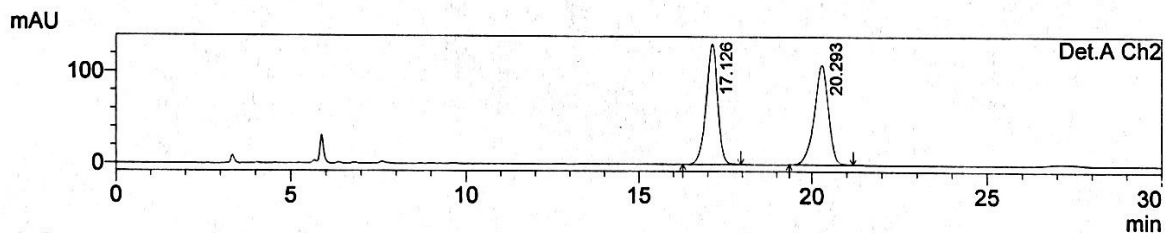

- 1 Det.A Ch1/220nm
- 2 Det.A Ch2/210nm

PeakTable

Detector A Ch1 220nm

| Peak# | Ret. Time | Area    | Height | Area %  | Height % |
|-------|-----------|---------|--------|---------|----------|
| 1     | 17.124    | 1797024 | 77416  | 50.015  | 54.705   |
| 2     | 20.291    | 1795951 | 64098  | 49.985  | 45.295   |
| Total |           | 3592976 | 141514 | 100.000 | 100.000  |

PeakTable

Detector A Ch2 210nm

| Peak# | Ret. Time | Area    | Height | Area %  | Height % |
|-------|-----------|---------|--------|---------|----------|
| 1     | 17.126    | 3072160 | 132476 | 49.987  | 54.689   |
| 2     | 20.293    | 3073760 | 109758 | 50.013  | 45.311   |
| Total |           | 6145919 | 242234 | 100.000 | 100.000  |

# ==== Shimadzu LCsolution Analysis Report ====

C:\LabSolutions\Data\DMM\DVR04296 D1\_1122017\_1914 PM\_6.lcd  
 Acquired by : LC User  
 Sample Name : DVR04296 D1  
 Sample ID : DVR04296 D1  
 Tray# : 1  
 Vail # : 2  
 Injection Volume : 5 uL  
 Data File Name : DVR04296 D1\_1122017\_1914 PM\_6.lcd  
 Method File Name : col1\_5isoiPA\_30min\_1ML\_220and210.lcm  
 Batch File Name : DMM.lcb  
 Report File Name : Default.lcr  
 Data Acquired : 1/12/2017 8:56:37 PM  
 Data Processed : 1/12/2017 9:26:41 PM

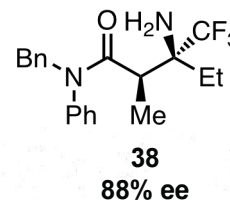

## <Chromatogram>

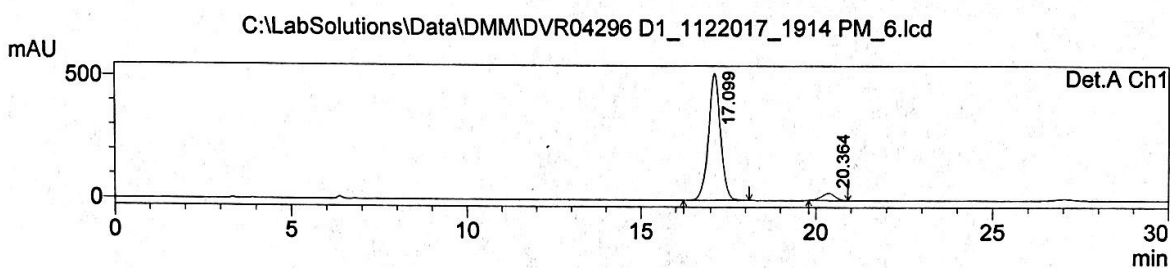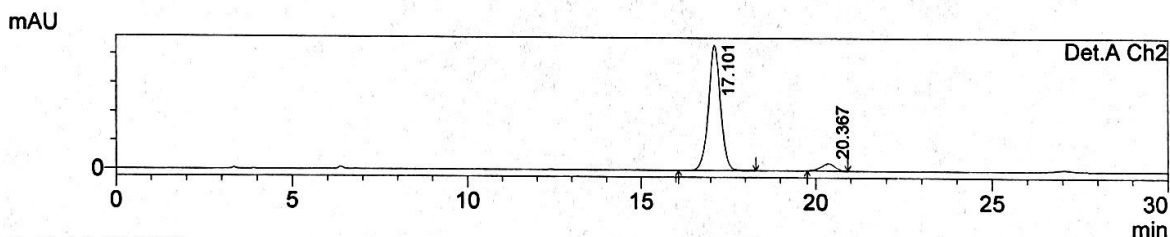

- 1 Det.A Ch1/220nm
- 2 Det.A Ch2/210nm

PeakTable

Detector A Ch1 220nm

| Peak# | Ret. Time | Area     | Height | Area %  | Height % |
|-------|-----------|----------|--------|---------|----------|
| 1     | 17.099    | 12356691 | 518103 | 94.085  | 94.670   |
| 2     | 20.364    | 776888   | 29168  | 5.915   | 5.330    |
| Total |           | 13133579 | 547271 | 100.000 | 100.000  |

PeakTable

Detector A Ch2 210nm

| Peak# | Ret. Time | Area     | Height | Area %  | Height % |
|-------|-----------|----------|--------|---------|----------|
| 1     | 17.101    | 21012325 | 874462 | 93.919  | 94.550   |
| 2     | 20.367    | 1360378  | 50401  | 6.081   | 5.450    |
| Total |           | 22372703 | 924864 | 100.000 | 100.000  |

# ==== Shimadzu LCsolution Analysis Report ====

C:\LabSolutions\Data\DMM\DVR05112 RAC COL2\_7312017\_1816 PM\_6.lcd  
 Acquired by : LC User  
 Sample Name : DVR05112 RAC COL2  
 Sample ID : DVR05112 RAC COL2  
 Tray# : 1  
 Vial # : 1  
 Injection Volume : 4 uL  
 Data File Name : DVR05112 RAC COL2\_7312017\_1816 PM\_6.lcd  
 Method File Name : col2\_3isoiPA\_45min\_1ML\_220and210.lcm  
 Batch File Name : DMM.lcb  
 Report File Name : Default.lcr  
 Data Acquired : 7/31/2017 7:33:04 PM  
 Data Processed : 8/28/2017 9:09:03 AM

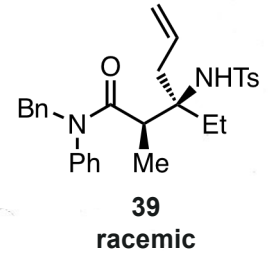

## <Chromatogram>

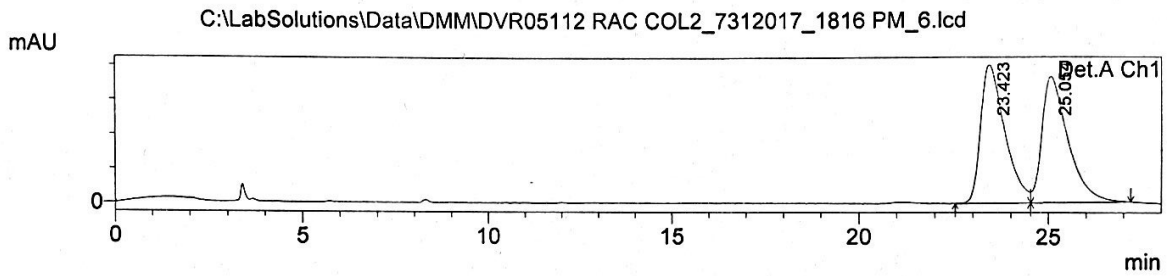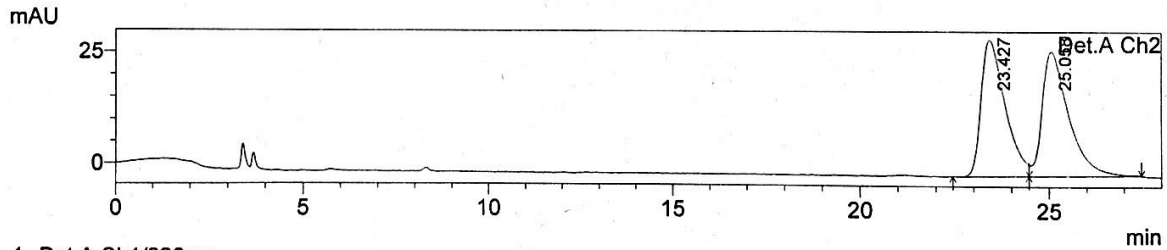

1 Det.A Ch1/220nm  
 2 Det.A Ch2/210nm

PeakTable

Detector A Ch1 220nm

| Peak# | Ret. Time | Area    | Height | Area %  | Height % |
|-------|-----------|---------|--------|---------|----------|
| 1     | 23.423    | 887881  | 19932  | 50.195  | 52.288   |
| 2     | 25.054    | 880972  | 18187  | 49.805  | 47.712   |
| Total |           | 1768853 | 38119  | 100.000 | 100.000  |

PeakTable

Detector A Ch2 210nm

| Peak# | Ret. Time | Area    | Height | Area %  | Height % |
|-------|-----------|---------|--------|---------|----------|
| 1     | 23.427    | 1346497 | 30425  | 49.495  | 52.327   |
| 2     | 25.058    | 1373982 | 27719  | 50.505  | 47.673   |
| Total |           | 2720479 | 58143  | 100.000 | 100.000  |



# ==== Shimadzu LCsolution Analysis Report ====

C:\LabSolutions\Data\DMM\DVR05113 R1\_812017\_1914 PM\_3.lcd  
 Acquired by : LC User  
 Sample Name : DVR05113 R1  
 Sample ID : DVR05113 R1  
 Tray# : 1  
 Vial # : 3  
 Injection Volume : 5 uL  
 Data File Name : DVR05113 R1\_812017\_1914 PM\_3.lcd  
 Method File Name : col2\_3isoiPA\_45min\_1ML\_254and210.lcm  
 Batch File Name : DMM.lcb  
 Report File Name : Default.lcr  
 Data Acquired : 8/1/2017 8:30:52 PM  
 Data Processed : 8/28/2017 9:06:53 AM

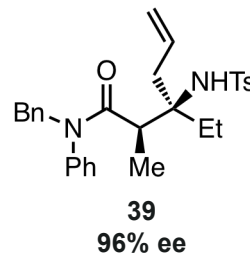

## <Chromatogram>

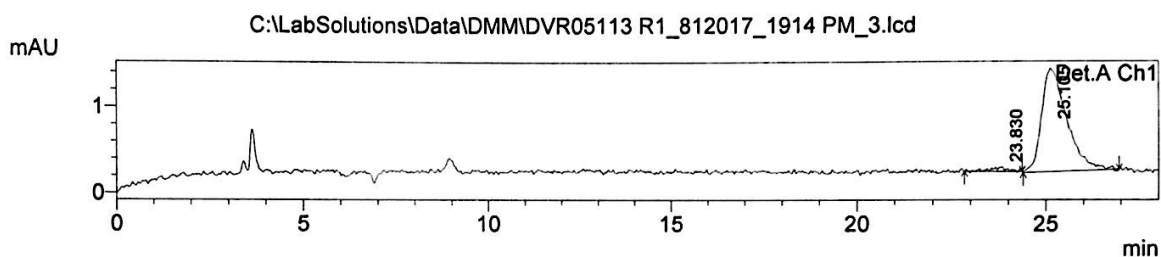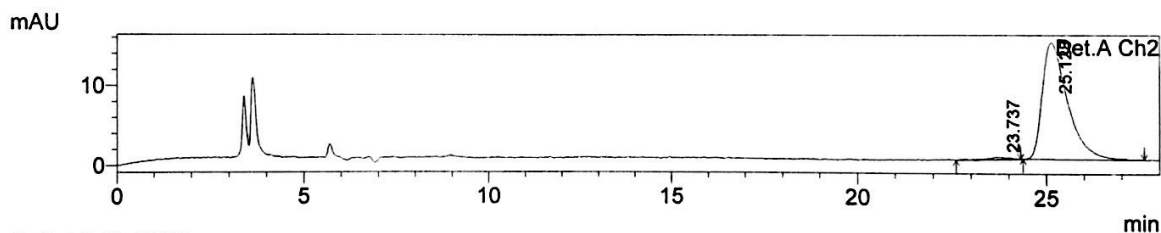

- 1 Det.A Ch1/254nm
- 2 Det.A Ch2/210nm

### PeakTable

Detector A Ch1 254nm

| Peak#        | Ret. Time | Area         | Height      | Area %         | Height %       |
|--------------|-----------|--------------|-------------|----------------|----------------|
| 1            | 23.830    | 1431         | 50          | 2.515          | 4.018          |
| 2            | 25.105    | 55484        | 1190        | 97.485         | 95.982         |
| <b>Total</b> |           | <b>56915</b> | <b>1240</b> | <b>100.000</b> | <b>100.000</b> |

### PeakTable

Detector A Ch2 210nm

| Peak#        | Ret. Time | Area          | Height       | Area %         | Height %       |
|--------------|-----------|---------------|--------------|----------------|----------------|
| 1            | 23.737    | 13302         | 305          | 1.922          | 2.063          |
| 2            | 25.128    | 678853        | 14504        | 98.078         | 97.937         |
| <b>Total</b> |           | <b>692155</b> | <b>14810</b> | <b>100.000</b> | <b>100.000</b> |

# ==== Shimadzu LCsolution Analysis Report ====

C:\LabSolutions\Data\DMMDVR04261\_11282016\_2040 PM\_2.lcd  
 Acquired by : LC User  
 Sample Name : DVR04261  
 Sample ID : DVR04261  
 Tray# : 1  
 Vial # : 1  
 Injection Volume : 3 uL  
 Data File Name : DVR04261\_11282016\_2040 PM\_2.lcd  
 Method File Name : col1\_5isoiPA\_30min\_1ML\_220and210.lcm  
 Batch File Name : DMM.lcb  
 Report File Name : Default.lcr  
 Data Acquired : 11/28/2016 9:51:02 PM  
 Data Processed : 11/29/2016 10:15:06 AM

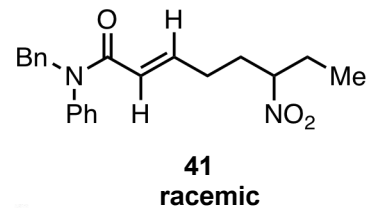

## <Chromatogram>

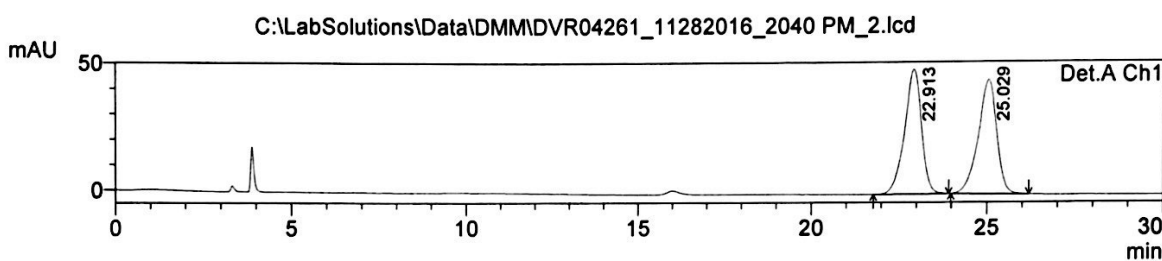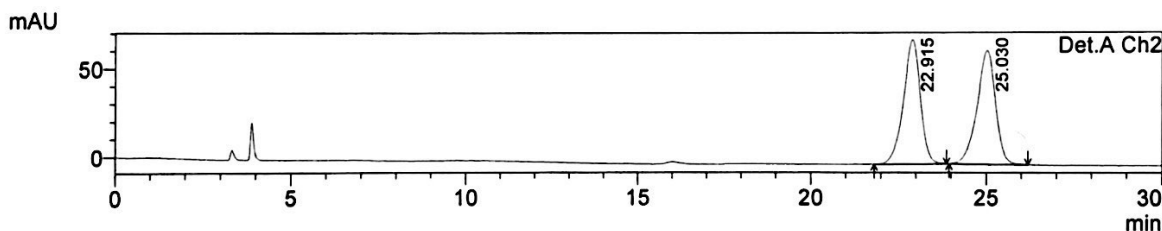

1 Det.A Ch1/220nm  
 2 Det.A Ch2/210nm

PeakTable

Detector A Ch1 220nm

| Peak# | Ret. Time | Area    | Height | Area %  | Height % |
|-------|-----------|---------|--------|---------|----------|
| 1     | 22.913    | 1640779 | 49207  | 50.076  | 52.291   |
| 2     | 25.029    | 1635815 | 44896  | 49.924  | 47.709   |
| Total |           | 3276593 | 94103  | 100.000 | 100.000  |

PeakTable

Detector A Ch2 210nm

| Peak# | Ret. Time | Area    | Height | Area %  | Height % |
|-------|-----------|---------|--------|---------|----------|
| 1     | 22.915    | 2351690 | 70527  | 50.093  | 52.300   |
| 2     | 25.030    | 2342912 | 64325  | 49.907  | 47.700   |
| Total |           | 4694603 | 134852 | 100.000 | 100.000  |



# ==== Shimadzu LCsolution Analysis Report ====

C:\LabSolutions\Data\DMM\DVR04258 COL1\_11232016\_1332 PM\_10.lcd  
 Acquired by : LC User  
 Sample Name : DVR04258 COL1  
 Sample ID : DVR04258 COL1  
 Tray# : 1  
 Vial # : 1  
 Injection Volume : 3 uL  
 Data File Name : DVR04258 COL1\_11232016\_1332 PM\_10.lcd  
 Method File Name : col1\_5isoiPA\_30min\_1ML\_220and210.lcm  
 Batch File Name : DMM.lcb  
 Report File Name : Default.lcr  
 Data Acquired : 11/23/2016 8:08:57 PM  
 Data Processed : 11/28/2016 10:02:36 AM

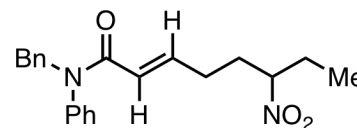

41  
16% ee

## <Chromatogram>

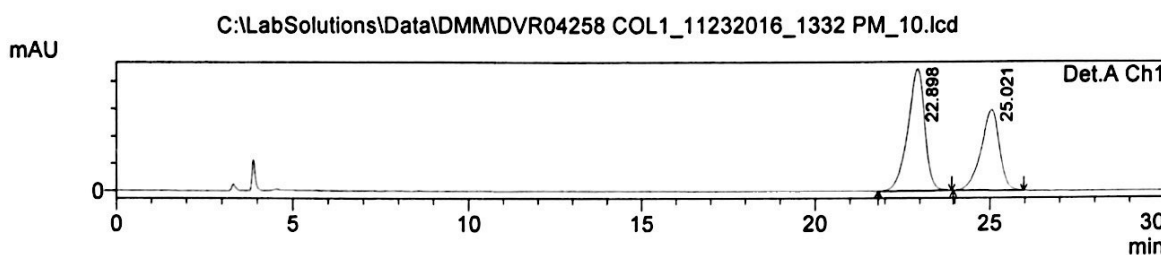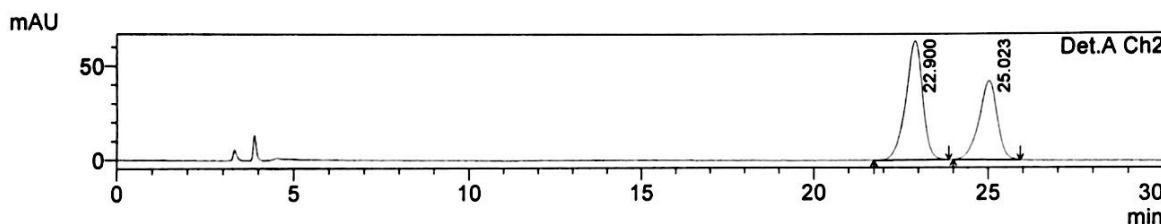

1 Det.A Ch1/220nm  
2 Det.A Ch2/210nm

PeakTable

Detector A Ch1 220nm

| Peak# | Ret. Time | Area    | Height | Area %  | Height % |
|-------|-----------|---------|--------|---------|----------|
| 1     | 22.898    | 1498085 | 44612  | 58.180  | 60.219   |
| 2     | 25.021    | 1076816 | 29471  | 41.820  | 39.781   |
| Total |           | 2574901 | 74083  | 100.000 | 100.000  |

PeakTable

Detector A Ch2 210nm

| Peak# | Ret. Time | Area    | Height | Area %  | Height % |
|-------|-----------|---------|--------|---------|----------|
| 1     | 22.900    | 2140251 | 63852  | 58.118  | 60.128   |
| 2     | 25.023    | 1542333 | 42341  | 41.882  | 39.872   |
| Total |           | 3682584 | 106193 | 100.000 | 100.000  |

# ==== Shimadzu LCsolution Analysis Report ====

C:\LabSolutions\Data\DMMDVR05088 RAC\_682017\_1612 PM\_3.lcd  
 Acquired by : LC User  
 Sample Name : DVR05088 RAC  
 Sample ID : DVR05088 RAC  
 Tray# : 1  
 Vial # : 3  
 Injection Volume : 5 uL  
 Data File Name : DVR05088 RAC\_682017\_1612 PM\_3.lcd  
 Method File Name : col1\_1isoiPA\_70min\_1ML\_254and210.lcm  
 Batch File Name : DMM.lcb  
 Report File Name : Default.lcr  
 Data Acquired : 6/8/2017 6:14:24 PM  
 Data Processed : 6/8/2017 7:34:27 PM

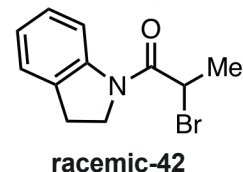

## <Chromatogram>

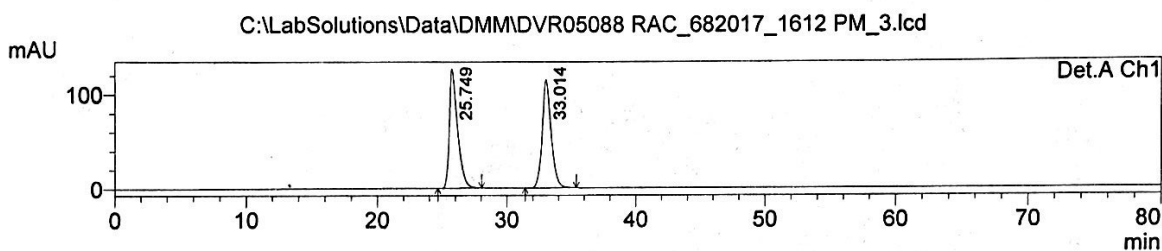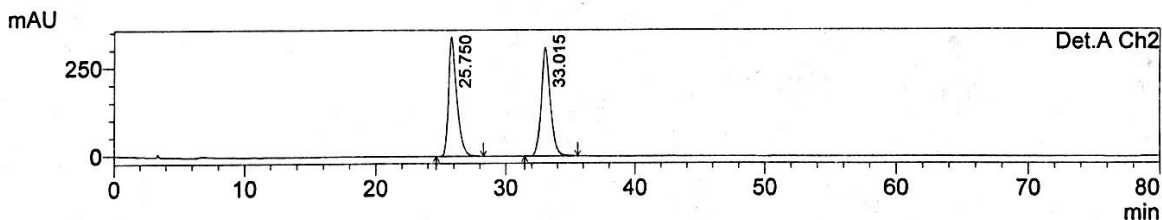

- 1 Det.A Ch1/254nm
- 2 Det.A Ch2/210nm

PeakTable

Detector A Ch1 254nm

| Peak# | Ret. Time | Area     | Height | Area %  | Height % |
|-------|-----------|----------|--------|---------|----------|
| 1     | 25.749    | 5523757  | 126927 | 50.001  | 52.473   |
| 2     | 33.014    | 5523525  | 114965 | 49.999  | 47.527   |
| Total |           | 11047282 | 241892 | 100.000 | 100.000  |

PeakTable

Detector A Ch2 210nm

| Peak# | Ret. Time | Area     | Height | Area %  | Height % |
|-------|-----------|----------|--------|---------|----------|
| 1     | 25.750    | 14973238 | 341657 | 49.948  | 52.416   |
| 2     | 33.015    | 15004329 | 310163 | 50.052  | 47.584   |
| Total |           | 29977568 | 651820 | 100.000 | 100.000  |

# ==== Shimadzu LCsolution Analysis Report ====

C:\LabSolutions\Data\DMMDVR05080 CROP2\_5312017\_1028 AM\_4.lcd  
 Acquired by : LC User  
 Sample Name : DVR05080 CROP2  
 Sample ID : DVR05080 CROP2  
 Tray# : 1  
 Vial # : 1  
 Injection Volume : 7 uL  
 Data File Name : DVR05080 CROP2\_5312017\_1028 AM\_4.lcd  
 Method File Name : col1\_1isoiPA\_45min\_1ML\_220and210.lcm  
 Batch File Name : DMM.lcb  
 Report File Name : Default.lcr  
 Data Acquired : 5/31/2017 12:20:55 PM  
 Data Processed : 5/31/2017 1:05:56 PM

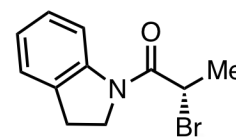

## <Chromatogram>

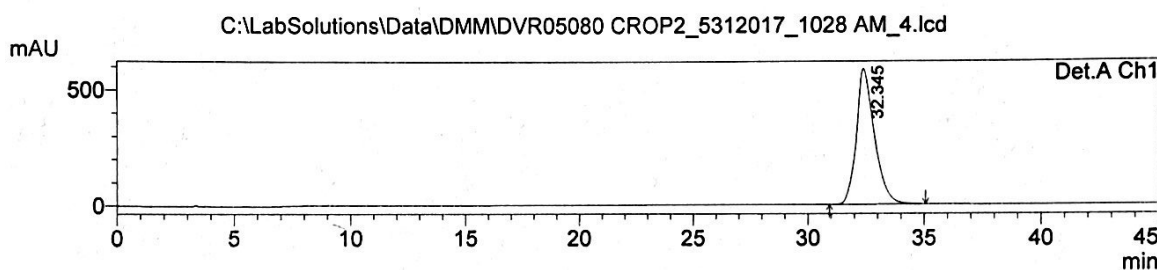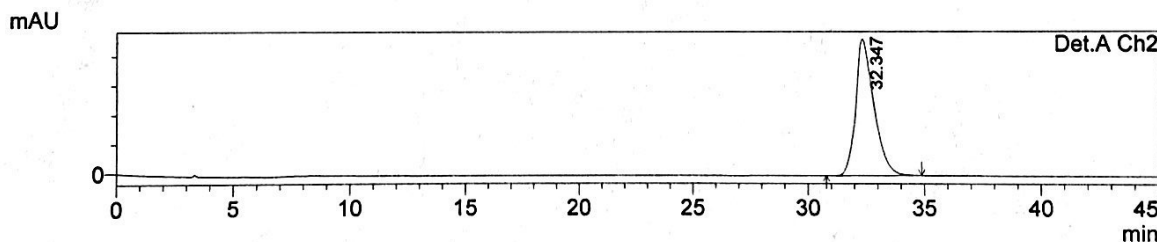

- 1 Det.A Ch1/220nm
- 2 Det.A Ch2/210nm

PeakTable

Detector A Ch1 220nm

| Peak# | Ret. Time | Area     | Height | Area %  | Height % |
|-------|-----------|----------|--------|---------|----------|
| 1     | 32.345    | 31626570 | 585635 | 100.000 | 100.000  |
| Total |           | 31626570 | 585635 | 100.000 | 100.000  |

PeakTable

Detector A Ch2 210nm

| Peak# | Ret. Time | Area     | Height | Area %  | Height % |
|-------|-----------|----------|--------|---------|----------|
| 1     | 32.347    | 50981975 | 932861 | 100.000 | 100.000  |
| Total |           | 50981975 | 932861 | 100.000 | 100.000  |

# ==== Shimadzu LCsolution Analysis Report ====

C:\LabSolutions\Data\DMM\DVR05085 CROP1\_612017\_1219 PM\_2.lcd  
 Acquired by : LC User  
 Sample Name : DVR05085 CROP1  
 Sample ID : DVR05085 CROP1  
 Tray# : 1  
 Vial # : 1  
 Injection Volume : 5 uL  
 Data File Name : DVR05085 CROP1\_612017\_1219 PM\_2.lcd  
 Method File Name : col1\_1isoiPA\_45min\_1ML\_220and210.lcm  
 Batch File Name : DMM.lcb  
 Report File Name : Default.lcr  
 Data Acquired : 6/1/2017 12:29:48 PM  
 Data Processed : 6/1/2017 1:14:50 PM

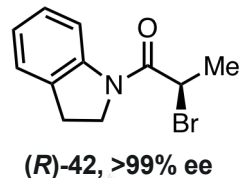

## <Chromatogram>

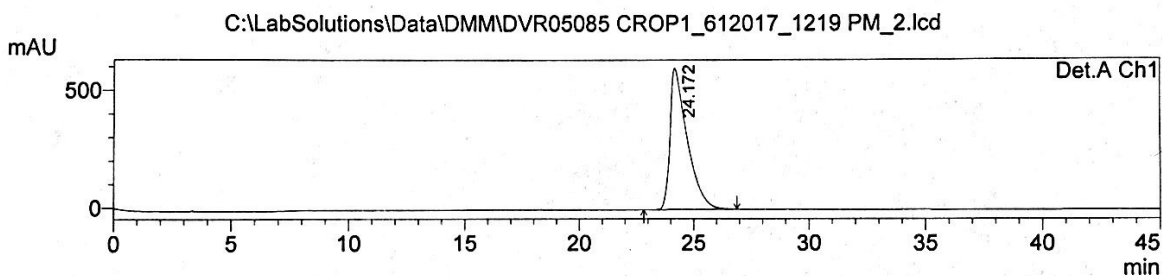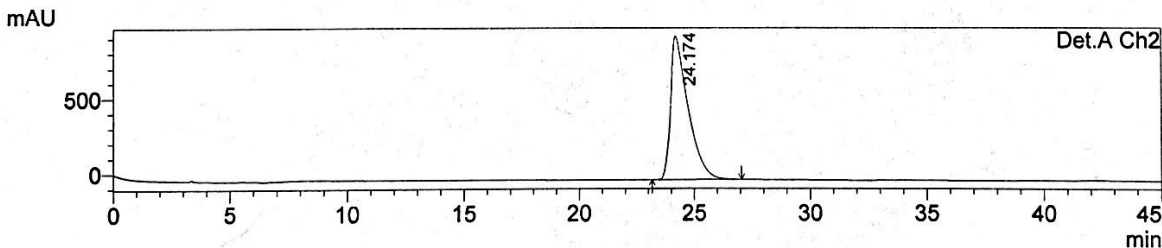

- 1 Det.A Ch1/220nm
- 2 Det.A Ch2/210nm

PeakTable

Detector A Ch1 220nm

| Peak# | Ret. Time | Area     | Height | Area %  | Height % |
|-------|-----------|----------|--------|---------|----------|
| 1     | 24.172    | 31383329 | 603604 | 100.000 | 100.000  |
| Total |           | 31383329 | 603604 | 100.000 | 100.000  |

PeakTable

Detector A Ch2 210nm

| Peak# | Ret. Time | Area     | Height | Area %  | Height % |
|-------|-----------|----------|--------|---------|----------|
| 1     | 24.174    | 50736042 | 961453 | 100.000 | 100.000  |
| Total |           | 50736042 | 961453 | 100.000 | 100.000  |

# ==== Shimadzu LCsolution Analysis Report ====

C:\LabSolutions\Data\DMM\DVR05088B\_682017\_1612 PM\_2.lcd  
 Acquired by : LC User  
 Sample Name : DVR05088B  
 Sample ID : DVR05088B  
 Tray# : 1  
 Vial # : 2  
 Injection Volume : 3 uL  
 Data File Name : DVR05088B\_682017\_1612 PM\_2.lcd  
 Method File Name : col1\_1isoiPA\_70min\_1ML\_254and210.lcm  
 Batch File Name : DMM.lcb  
 Report File Name : Default.lcr  
 Data Acquired : 6/8/2017 4:28:27 PM  
 Data Processed : 6/8/2017 5:58:36 PM

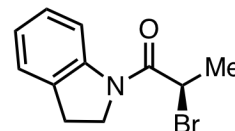

## <Chromatogram>

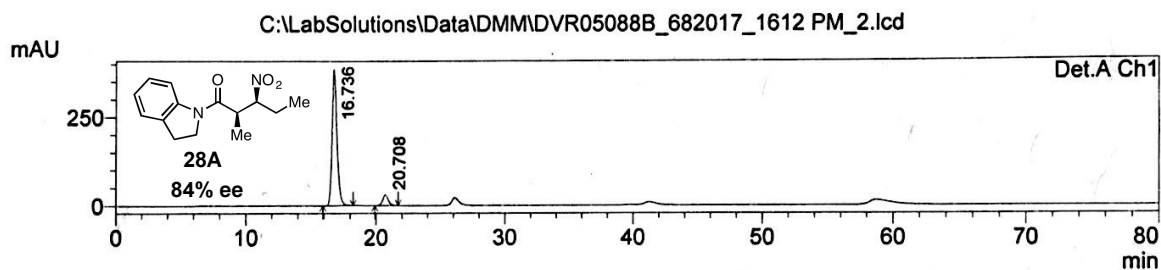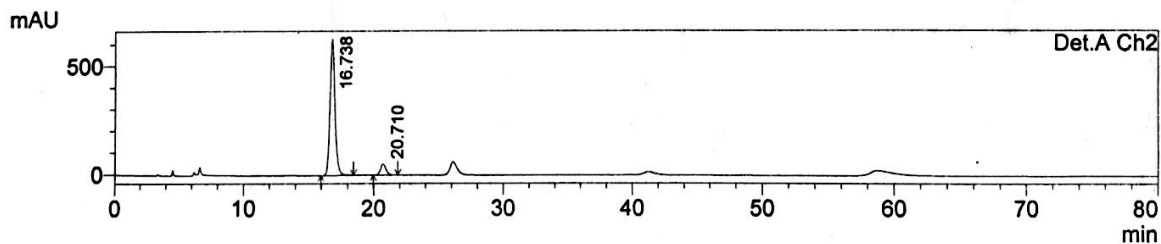

1 Det.A Ch1/254nm  
 2 Det.A Ch2/210nm

PeakTable

Detector A Ch1 254nm

| Peak# | Ret. Time | Area     | Height | Area %  | Height % |
|-------|-----------|----------|--------|---------|----------|
| 1     | 16.736    | 9966909  | 385908 | 91.608  | 92.589   |
| 2     | 20.708    | 913061   | 30889  | 8.392   | 7.411    |
| Total |           | 10879970 | 416797 | 100.000 | 100.000  |

PeakTable

Detector A Ch2 210nm

| Peak# | Ret. Time | Area     | Height | Area %  | Height % |
|-------|-----------|----------|--------|---------|----------|
| 1     | 16.738    | 16383132 | 628903 | 91.531  | 92.486   |
| 2     | 20.710    | 1515871  | 51098  | 8.469   | 7.514    |
| Total |           | 17899003 | 680001 | 100.000 | 100.000  |



# ==== Shimadzu LCsolution Analysis Report ====

C:\LabSolutions\Data\DMM\DVR05088B\_682017\_1612 PM\_2.lcd  
 Acquired by : LC User  
 Sample Name : DVR05088B  
 Sample ID : DVR05088B  
 Tray# : 1  
 Vial # : 2  
 Injection Volume : 3 uL  
 Data File Name : DVR05088B\_682017\_1612 PM\_2.lcd  
 Method File Name : col1\_1isoIPA\_70min\_1ML\_254and210.lcm  
 Batch File Name : DMM.lcb  
 Report File Name : Default.lcr  
 Data Acquired : 6/8/2017 4:28:27 PM  
 Data Processed : 6/8/2017 5:48:30 PM

## <Chromatogram>

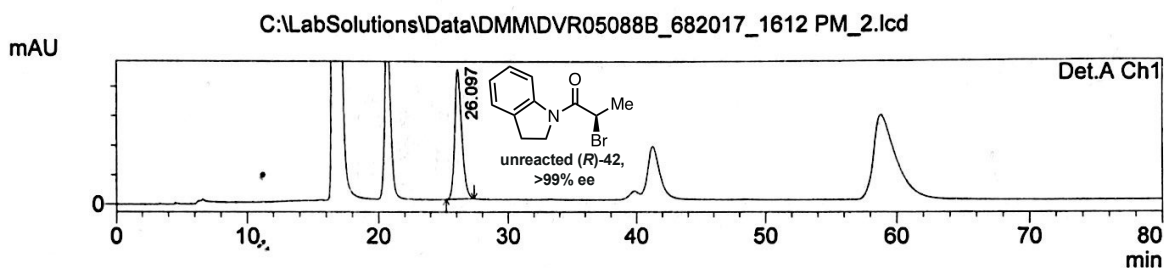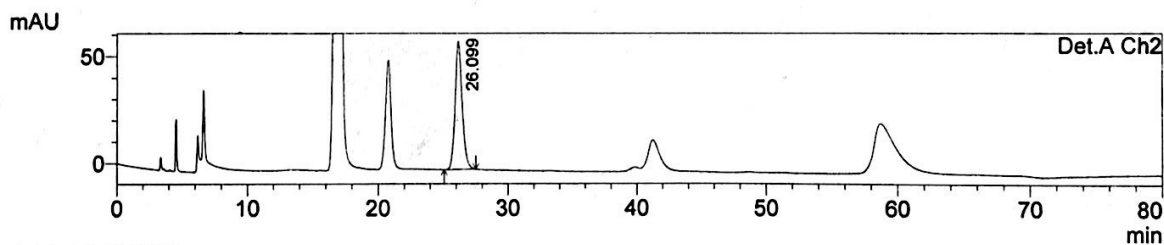

- 1 Det.A Ch1/254nm
- 2 Det.A Ch2/210nm

PeakTable

Detector A Ch1 254nm

| Peak# | Ret. Time | Area   | Height | Area %  | Height % |
|-------|-----------|--------|--------|---------|----------|
| 1     | 26.097    | 827395 | 22041  | 100.000 | 100.000  |
| Total |           | 827395 | 22041  | 100.000 | 100.000  |

PeakTable

Detector A Ch2 210nm

| Peak# | Ret. Time | Area    | Height | Area %  | Height % |
|-------|-----------|---------|--------|---------|----------|
| 1     | 26.099    | 2270685 | 60158  | 100.000 | 100.000  |
| Total |           | 2270685 | 60158  | 100.000 | 100.000  |

# ==== Shimadzu LCsolution Analysis Report ====

C:\LabSolutions\Data\DMM\DVR05088A\_682017\_1113 AM\_2.lcd  
 Acquired by : LC User  
 Sample Name : DVR05088A  
 Sample ID : DVR05088A  
 Tray# : 1  
 Vial # : 1  
 Injection Volume : 3 uL  
 Data File Name : DVR05088A\_682017\_1113 AM\_2.lcd  
 Method File Name : col\_1\_isoIPA\_70min\_1ML\_254and210.lcm  
 Batch File Name : DMM.lcb  
 Report File Name : Default.lcr  
 Data Acquired : 6/8/2017 11:28:54 AM  
 Data Processed : 6/8/2017 12:48:55 PM

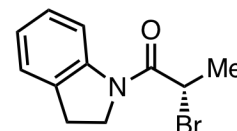

using (S)-42, >99% ee

## <Chromatogram>

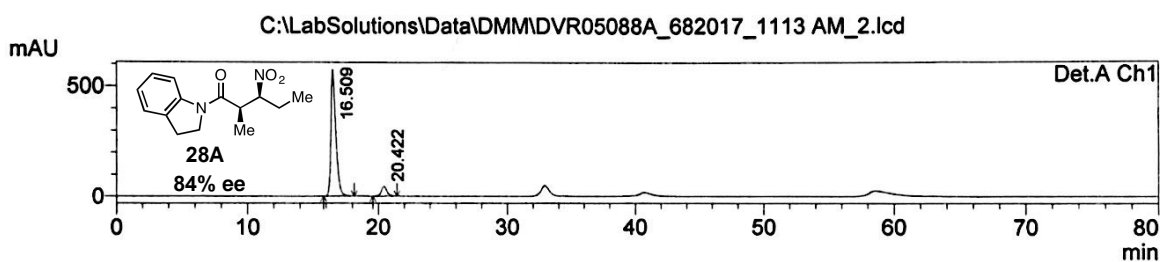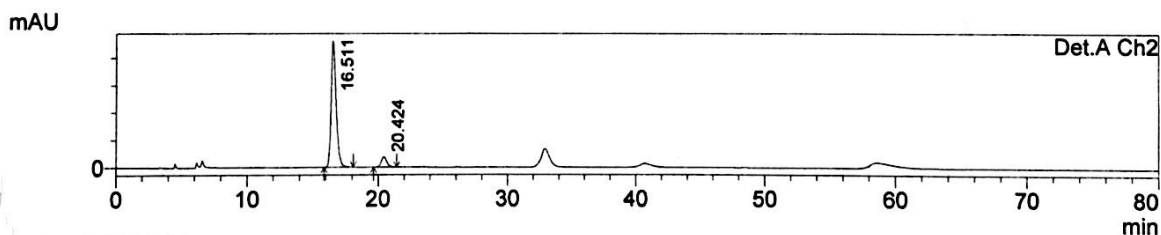

- 1 Det.A Ch1/254nm
- 2 Det.A Ch2/210nm

### PeakTable

#### Detector A Ch1 254nm

| Peak# | Ret. Time | Area     | Height | Area %  | Height % |
|-------|-----------|----------|--------|---------|----------|
| 1     | 16.509    | 14896468 | 575351 | 91.767  | 92.689   |
| 2     | 20.422    | 1336390  | 45383  | 8.233   | 7.311    |
| Total |           | 16232859 | 620734 | 100.000 | 100.000  |

### PeakTable

#### Detector A Ch2 210nm

| Peak# | Ret. Time | Area     | Height | Area %  | Height % |
|-------|-----------|----------|--------|---------|----------|
| 1     | 16.511    | 24214155 | 924284 | 91.633  | 92.488   |
| 2     | 20.424    | 2210874  | 75070  | 8.367   | 7.512    |
| Total |           | 26425029 | 999354 | 100.000 | 100.000  |

# ==== Shimadzu LCsolution Analysis Report ====

C:\LabSolutions\Data\DMMDVR05088A\_682017\_1113  
 Acquired by : LC User  
 Sample Name : DVR05088A  
 Sample ID : DVR05088A  
 Tray# : 1  
 Vial # : 1  
 Injection Volume : 3 uL  
 Data File Name : DVR05088A\_682017\_1113 AM\_2.lcd  
 Method File Name : col1\_1isoiPA\_70min\_1ML\_254and210.lcm  
 Batch File Name : DMM.lcb  
 Report File Name : Default.lcr  
 Data Acquired : 6/8/2017 11:28:54 AM  
 Data Processed : 6/8/2017 5:33:03 PM

## <Chromatogram>

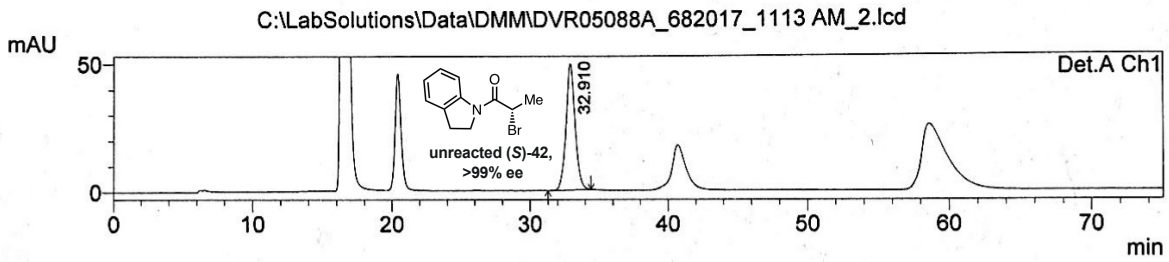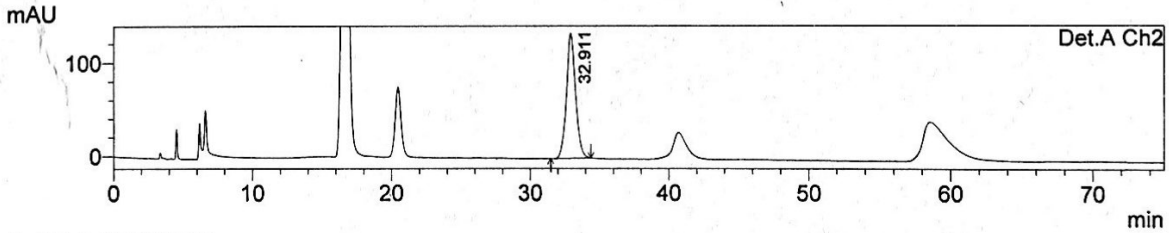

- 1 Det.A Ch1/254nm
- 2 Det.A Ch2/210nm

PeakTable

Detector A Ch1 254nm

| Peak# | Ret. Time | Area    | Height | Area %  | Height % |
|-------|-----------|---------|--------|---------|----------|
| 1     | 32.910    | 2257829 | 49329  | 100.000 | 100.000  |
| Total |           | 2257829 | 49329  | 100.000 | 100.000  |

PeakTable

Detector A Ch2 210nm

| Peak# | Ret. Time | Area    | Height | Area %  | Height % |
|-------|-----------|---------|--------|---------|----------|
| 1     | 32.911    | 6129378 | 133936 | 100.000 | 100.000  |
| Total |           | 6129378 | 133936 | 100.000 | 100.000  |
